# Supplementary material for: Binding affinity landscapes constrain the evolution of broadly neutralizing anti-influenza antibodies
Source: eLife. 2021 Sep 7;10:e71393. doi: 10.7554/eLife.71393 (PMC8476123; doi:10.7554/eLife.71393)
Supplement: Figure 1—source data 1. — Biological triplicates, mean, and standard error reported. [file elife-71393-fig1-data1.csv]

genotype	h1_repa	h1_repb	h1_repc	h1_mean	h1_sem	h3_repa	h3_repb	h3_repc	h3_mean	h3_sem	fluB_repa	fluB_repb	fluB_repc	fluB_mean	fluB_sem	pos1	pos2	pos3	pos4	pos5	pos6	pos7	pos8	pos9	pos10	pos11	pos12	pos13	pos14	pos15	pos16	som_mut
1001110010000101	9.502126580203958	9.499466730194165	9.452164031799166	9.484585780732429	0.011475670303133671	6.0	6.0	6.0	6.0	0.0	6.0	6.0	6.0	6.0	0.0	1	0	0	1	1	1	0	0	1	0	0	0	0	1	0	1	7
0001111110011011	9.526711309830567	9.446816938521431	9.319444739520724	9.430990995957574	0.042676502386221685	6.0	6.0	6.0	6.0	0.0	6.0	6.0	6.0	6.0	0.0	0	0	0	1	1	1	1	1	1	0	0	1	1	0	1	1	10
1111110010011111	9.522475461684577	9.556414833062364	9.41212903136441	9.497006442037117	0.030798001461830187	6.7192672661177015	6.789485845271015	6.699885241136367	6.736212784175028	0.01924590866477363	6.0	6.0	6.0	6.0	0.0	1	1	1	1	1	1	0	0	1	0	0	1	1	1	1	1	12
1011111110101110	9.520731406451196	9.55745527423728	9.420887596463675	9.499691425717383	0.02885219011062568	6.0	6.0	6.0	6.0	0.0	6.0	6.0	6.0	6.0	0.0	1	0	1	1	1	1	1	1	1	0	1	0	1	1	1	0	12
1111101010000111	9.346955471156232	9.39831079519755	9.39694574950768	9.380737338620486	0.011946943573310994	6.0	6.0	6.0	6.0	0.0	6.0	6.0	6.0	6.0	0.0	1	1	1	1	1	0	1	0	1	0	0	0	0	1	1	1	10
1111010011110011	9.570628307150264	9.476580528606467	9.53985182491044	9.52902022022239	0.01957566051394931	7.94399678829471	7.857011787040745	7.876907589320912	7.892638721552122	0.018606446023465957	6.0	6.0	6.0	6.0	0.0	1	1	1	1	0	1	0	0	1	1	1	1	0	0	1	1	11
1100101011111101	9.588783601887616	9.614488916610746	9.563536490272458	9.58893633625694	0.010400760655518928	6.0	6.0	6.0	6.0	0.0	6.0	6.0	6.0	6.0	0.0	1	1	0	0	1	0	1	0	1	1	1	1	1	1	0	1	11
1011010010101001	9.408602504102292	9.411665935243779	9.371943757797158	9.39740406571441	0.009023271875365774	6.0	6.0	6.0	6.0	0.0	6.0	6.0	6.0	6.0	0.0	1	0	1	1	0	1	0	0	1	0	1	0	1	0	0	1	8
1101000111011001	9.534194871788213	9.507164744438349	9.502481033675783	9.514613549967448	0.006988745831848734	6.940644342453253	7.0083267633690856	6.274217580930588	6.741062895584309	0.16563194055186317	6.0	6.0	6.0	6.0	0.0	1	1	0	1	0	0	0	1	1	1	0	1	1	0	0	1	9
1011101011100101	9.509721518606792	9.482688036222637	9.441328494682024	9.477912683170485	0.014062387350499977	6.70810582769509	6.894556187491983	6.899517330332782	6.834059781839952	0.04454296083205545	6.0	6.0	6.0	6.0	0.0	1	0	1	1	1	0	1	0	1	1	1	0	0	1	0	1	10
0111101011111001	9.46957845206734	9.452491134759784	9.401233118260881	9.441100901696002	0.01452052696595711	7.522599767179643	7.344008529415955	7.524204854664358	7.463604383753318	0.04228478914351927	6.0	6.0	6.0	6.0	0.0	0	1	1	1	1	0	1	0	1	1	1	1	1	0	0	1	11
1111011101011011	9.522704131870514	9.550830022112333	9.514333700588463	9.529289284857104	0.007805111050736977	6.0	6.0	6.0	6.0	0.0	6.0	6.0	6.0	6.0	0.0	1	1	1	1	0	1	1	1	0	1	0	1	1	0	1	1	12
1111000111011011	9.56689967827206	9.509543078994156	9.527409224959671	9.534617327408627	0.01198201726107034	7.576941499256527	7.589320415104115	7.6583597215834365	7.60820721198136	0.017910727948775167	6.0	6.0	6.0	6.0	0.0	1	1	1	1	0	0	0	1	1	1	0	1	1	0	1	1	11
1101111110100111	9.577432618009608	9.548861310313855	9.463262595884574	9.529852174736012	0.02425458346570908	6.0	6.0	6.0	6.0	0.0	6.0	6.0	6.0	6.0	0.0	1	1	0	1	1	1	1	1	1	0	1	0	0	1	1	1	12
1111101110101110	9.483708040503037	9.537836546227751	9.388606698086695	9.470050428272495	0.030841759226008732	6.0	6.0	6.0	6.0	0.0	6.0	6.0	6.0	6.0	0.0	1	1	1	1	1	0	1	1	1	0	1	0	1	1	1	0	12
0111010111011011	9.474299685344509	9.453091501331288	9.354317839690644	9.427236342122148	0.02614153070283779	7.5831182402916815	7.5628604398572	7.64461365454244	7.596864111563774	0.017381066138255387	6.0	6.0	6.0	6.0	0.0	0	1	1	1	0	1	0	1	1	1	0	1	1	0	1	1	11
1111100111100100	9.513345718926818	9.54003343120048	9.549107525476348	9.534162225201216	0.007589246743867955	7.494355146177712	7.5069262706706334	7.372531753797589	7.457937723548645	0.030304408492805197	6.0	6.0	6.0	6.0	0.0	1	1	1	1	1	0	0	1	1	1	1	0	0	1	0	0	10
1101101111010111	9.587419759380767	9.511537998183767	9.504749503466947	9.534569087010494	0.018736844685550032	6.995089293693089	6.7031001061866835	7.184974759494259	6.961054719791345	0.09909554273576841	6.0	6.0	6.0	6.0	0.0	1	1	0	1	1	0	1	1	1	1	0	1	0	1	1	1	12
1111000111101001	9.547442170014278	9.562052132141753	9.508267293996603	9.539253865384211	0.011354062805233177	7.241789110552221	7.175886325043452	7.287527746637522	7.235067727411065	0.0229122765396774	6.0	6.0	6.0	6.0	0.0	1	1	1	1	0	0	0	1	1	1	1	0	1	0	0	1	10
1101111110011011	9.579744177672602	9.510521099612557	9.431117726727727	9.507127668004296	0.03036196088769975	6.0	6.0	6.0	6.0	0.0	6.0	6.0	6.0	6.0	0.0	1	1	0	1	1	1	1	1	1	0	0	1	1	0	1	1	12
1101000111110110	9.556612205440164	9.58172111686219	9.537971099754712	9.558768140685688	0.00896290542377593	6.66918576112247	6.638361422011707	6.033472548458537	6.447006577197571	0.14634168332151992	6.0	6.0	6.0	6.0	0.0	1	1	0	1	0	0	0	1	1	1	1	1	0	1	1	0	10
1101011101011101	9.516265452157986	9.46430515992494	9.519059617154998	9.499876743079309	0.012589380350045741	6.0	6.0	6.0	6.0	0.0	6.0	6.0	6.0	6.0	0.0	1	1	0	1	0	1	1	1	0	1	0	1	1	1	0	1	11
1101110001001100	9.601179213255543	9.641168626044081	9.614957712483212	9.619101850594278	0.00829325724414834	6.0	6.0	6.0	6.0	0.0	6.0	6.0	6.0	6.0	0.0	1	1	0	1	1	1	0	0	0	1	0	0	1	1	0	0	8
1001111010001011	9.588434190986199	9.536635576307688	9.532522600723269	9.552530789339052	0.012721502986523582	6.0	6.0	6.0	6.0	0.0	6.0	6.0	6.0	6.0	0.0	1	0	0	1	1	1	1	0	1	0	0	0	1	0	1	1	9
1101101011111101	9.53790814649774	9.530053420348564	9.530434043820717	9.532798536889006	0.0018081897633697576	6.958480229810783	6.965106394264279	7.1248018689258386	7.016129497666967	0.03844528519014776	6.0	6.0	6.0	6.0	0.0	1	1	0	1	1	0	1	0	1	1	1	1	1	1	0	1	12
0101011101110111	9.49098523839993	9.579640744773855	9.43158084669656	9.500735609956783	0.03041856796921685	6.0	6.0	6.0	6.0	0.0	6.0	6.0	6.0	6.0	0.0	0	1	0	1	0	1	1	1	0	1	1	1	0	1	1	1	11
1101111001111101	9.578470252806056	9.606272843749867	9.558560901603476	9.581101332719799	0.009783483462614536	6.0	6.0	6.0	6.0	0.0	6.0	6.0	6.0	6.0	0.0	1	1	0	1	1	1	1	0	0	1	1	1	1	1	0	1	12
1011110101000100	9.54837437835768	9.563610287424485	9.665339370786203	9.59244134552279	0.02596030558613141	6.0	6.0	6.0	6.0	0.0	6.0	6.0	6.0	6.0	0.0	1	0	1	1	1	1	0	1	0	1	0	0	0	1	0	0	8
1110010111111111	9.578946100348617	9.5124850144437	9.418908278289782	9.5034464643607	0.032823512058268924	6.0	6.0	6.0	6.0	0.0	6.0	6.0	6.0	6.0	0.0	1	1	1	0	0	1	0	1	1	1	1	1	1	1	1	1	13
1101011011101111	9.57629038319882	9.566268187833273	9.559532364278631	9.567363645103574	0.003442572185291294	6.0	6.291103200522751	6.0	6.097034400174251	0.06861368237158151	6.0	6.0	6.0	6.0	0.0	1	1	0	1	0	1	1	0	1	1	1	0	1	1	1	1	12
1101101111011111	9.55736977327579	9.509287034464279	9.493948377401233	9.520201728380433	0.013508739585491848	6.988257675483299	7.175492052884741	7.137742518191527	7.100497415519855	0.040423953861940955	6.0	6.0	6.0	6.0	0.0	1	1	0	1	1	0	1	1	1	1	0	1	1	1	1	1	13
1111110101110011	9.555703608056552	9.595167926249689	9.486368405332806	9.545746646546348	0.022485883533980944	6.892563179080432	6.599765673452383	6.4802952342728535	6.657541362268556	0.08659747613970788	6.0	6.0	6.0	6.0	0.0	1	1	1	1	1	1	0	1	0	1	1	1	0	0	1	1	12
1110010111011011	9.514845137234756	9.559456093844974	9.516568854637368	9.530290028572367	0.010317762378826117	6.0	6.0	6.0	6.0	0.0	6.0	6.0	6.0	6.0	0.0	1	1	1	0	0	1	0	1	1	1	0	1	1	0	1	1	11
1111110101011101	9.60091394257803	9.56265808347117	9.527949462088161	9.563840496045787	0.014899678004974798	6.612417087532745	6.686296799409245	6.171204818401673	6.489972901781221	0.11370603266965915	6.0	6.0	6.0	6.0	0.0	1	1	1	1	1	1	0	1	0	1	0	1	1	1	0	1	12
1101010010100011	9.376334724721344	9.472554550100076	9.366689076065539	9.405192783628985	0.023897228992350573	6.0	6.0	6.0	6.0	0.0	6.0	6.0	6.0	6.0	0.0	1	1	0	1	0	1	0	0	1	0	1	0	0	0	1	1	8
1111110111010011	9.572421126032674	9.548953083372773	9.486873069994092	9.536082426466512	0.018045580391027043	8.985601180803759	8.64875182700346	8.807731631918852	8.814028213242024	0.06879511488372451	7.2870951337676395		7.326484300891818	7.306789717329728	0.011370673121149777	1	1	1	1	1	1	0	1	1	1	0	1	0	0	1	1	12
1101011111011111	9.555666001991396	9.54925700414375	9.553948658480387	9.552957221538511	0.00135437708683565	6.0	6.0	6.0	6.0	0.0	6.0	6.0	6.0	6.0	0.0	1	1	0	1	0	1	1	1	1	1	0	1	1	1	1	1	13
1111111110111011	9.4835467200146	9.558175589720758	9.529595340960345	9.5237725502319	0.015372029346105275	6.53123080284645	7.123248407848518	6.2029151577829325	6.619131456159299	0.19041543023684218	6.0	6.0	6.0	6.0	0.0	1	1	1	1	1	1	1	1	1	0	1	1	1	0	1	1	14
1011000111110011	9.59137725529204	9.520849269415363	9.519814958464028	9.544013827723811	0.01674683130746523	7.201760895169895	7.172213266146178	7.114162307364575	7.162712156226884	0.018193778532076484	6.0	6.0	6.0	6.0	0.0	1	0	1	1	0	0	0	1	1	1	1	1	0	0	1	1	10
1111011011100000	9.5333339302896	9.570495024530038	9.588842563543153	9.564223839454264	0.011545546855175389	6.0485776871349515	6.02120084930695	6.0	6.023259512147301	0.009942555769376625	6.0	6.0	6.0	6.0	0.0	1	1	1	1	0	1	1	0	1	1	1	0	0	0	0	0	9
1111010011011011	9.522284138770047	9.574992938905721	9.498625918355025	9.531967665343599	0.01595988968280129	7.823041381900219	7.808610412762227	8.004519990209	7.878723928290481	0.04457306756555478	6.0	6.0	6.0	6.0	0.0	1	1	1	1	0	1	0	0	1	1	0	1	1	0	1	1	11
1101111001010101	9.659848596000279	9.594113029462337	9.504735020083123	9.586232215181914	0.031784786150357416	6.0	6.0	6.0	6.0	0.0	6.0	6.0	6.0	6.0	0.0	1	1	0	1	1	1	1	0	0	1	0	1	0	1	0	1	10
1101111010100101	9.525992228948198	9.491218645542565	9.550086935305163	9.52243260326531	0.012082163755891164	6.0	6.0	6.0	6.0	0.0	6.0	6.0	6.0	6.0	0.0	1	1	0	1	1	1	1	0	1	0	1	0	0	1	0	1	10
1111000111111011	9.511811774872186	9.522345633894062	9.538954782751162	9.524370730505803	0.005586613186817009	7.644636072394639	7.6037288928413895	7.580118225168237	7.609494396801421	0.013326470710689601	6.0	6.0	6.0	6.0	0.0	1	1	1	1	0	0	0	1	1	1	1	1	1	0	1	1	12
1101000111011011	9.515745384108296	9.572663146829774	9.467474432520733	9.518627654486266	0.021495724444627082	6.780696547963225	6.868769332398357	6.450833890769067	6.700099923710217	0.08994384379823056	6.0	6.0	6.0	6.0	0.0	1	1	0	1	0	0	0	1	1	1	0	1	1	0	1	1	10
1110010011111011	9.500097343031024	9.49344138823398	9.511381096352242	9.501639942539082	0.0037023189078782353	6.0	6.0	6.0	6.0	0.0	6.0	6.0	6.0	6.0	0.0	1	1	1	0	0	1	0	0	1	1	1	1	1	0	1	1	11
1101000011101101	9.593784526976037	9.448547453907846	9.535585380346674	9.525972453743519	0.029840571142774795	6.8930505388929495	6.9903049686619445	6.993193468958357	6.95884965883775	0.02327097261118566	6.0	6.0	6.0	6.0	0.0	1	1	0	1	0	0	0	0	1	1	1	0	1	1	0	1	9
1111101011110011	9.540938574472914	9.512193839776302	9.479538983305419	9.510890465851546	0.012541607662594465	7.7158153918717245	7.660092485108264	7.722910184756166	7.699606020578718	0.014045008814221679	6.0	6.0	6.0	6.0	0.0	1	1	1	1	1	0	1	0	1	1	1	1	0	0	1	1	12
1111101101010011	9.451669613276572	9.492814627161923	9.418505250448572	9.45432983029569	0.015197469267520063	6.0	6.0	6.0	6.0	0.0	6.0	6.0	6.0	6.0	0.0	1	1	1	1	1	0	1	1	0	1	0	1	0	0	1	1	11
1101110101011111	9.593565425909418	9.619736676420336	9.487268205218124	9.566856769182627	0.02864142752429036	6.0	6.0	6.0	6.0	0.0	6.0	6.0	6.0	6.0	0.0	1	1	0	1	1	1	0	1	0	1	0	1	1	1	1	1	12
1011011111011101	9.616700506139498	9.528677142418314	9.371008934274276	9.505462194277362	0.05081877521200744	6.0	6.067080236182865	6.0	6.022360078727622	0.015810963296166367	6.0	6.0	6.0	6.0	0.0	1	0	1	1	0	1	1	1	1	1	0	1	1	1	0	1	12
1111000011010011	9.511313163816887	9.43736439000663	9.497691185745241	9.482122913189585	0.016066962063945017	7.539874761244753	7.568314889433436	7.5564224384978935	7.554870696392027	0.005831182706214425	6.0	6.0	6.0	6.0	0.0	1	1	1	1	0	0	0	0	1	1	0	1	0	0	1	1	9
1111000011111101	9.564900666464316	9.573859159853393	9.543784609285492	9.560848145201067	0.006303925290472199	7.757376186836505	7.7604200096590885	7.7092240714660525	7.742340089320549	0.01172475439151645	6.0	6.0	6.0	6.0	0.0	1	1	1	1	0	0	0	0	1	1	1	1	1	1	0	1	11
1101110110010001	9.49445424376606	9.498223013149078	9.477587149896	9.490088135603711	0.00448621756817347	6.0	6.0	6.0	6.0	0.0	6.0	6.0	6.0	6.0	0.0	1	1	0	1	1	1	0	1	1	0	0	1	0	0	0	1	9
1111010111100011	9.522039516893102	9.525934281373694	9.473906392832466	9.507293397033088	0.011830830730968881	7.169186029506863	7.132615825796695	7.2826801102370675	7.1948273218468755	0.03194508118317988	6.0	6.0	6.0	6.0	0.0	1	1	1	1	0	1	0	1	1	1	1	0	0	0	1	1	11
1101010001001101	9.538235397891537	9.55184528529328	9.6387533638205	9.576278015668438	0.02226239019741951	6.0	6.0	6.0	6.0	0.0	6.0	6.0	6.0	6.0	0.0	1	1	0	1	0	1	0	0	0	1	0	0	1	1	0	1	8
1101111110011101	9.543350835797847	9.53429905636436	9.507206199281631	9.528285363814613	0.007678238304720919	6.0	6.0	6.0	6.0	0.0	6.0	6.0	6.0	6.0	0.0	1	1	0	1	1	1	1	1	1	0	0	1	1	1	0	1	12
1100010111011101	9.592949550649047	9.552121162440953	9.522255287829008	9.55577533363967	0.014488124011751476	6.0	6.0	6.0	6.0	0.0	6.0	6.0	6.0	6.0	0.0	1	1	0	0	0	1	0	1	1	1	0	1	1	1	0	1	10
1101000111000011	9.538976192947958	9.531334212181633	9.486310804359306	9.518873736496298	0.011617934265085146	6.728968582511271	6.797043435540002	6.360656401476648	6.628889473175974	0.095847345615013	6.0	6.0	6.0	6.0	0.0	1	1	0	1	0	0	0	1	1	1	0	0	0	0	1	1	8
1001000110011011	9.444075426881042	9.357440955758584	9.347849042131381	9.383121808257002	0.021639119357010215	6.0	6.0	6.0	6.0	0.0	6.0	6.0	6.0	6.0	0.0	1	0	0	1	0	0	0	1	1	0	0	1	1	0	1	1	8
1001010111011011	9.587430771455876	9.497571526276783	9.471270202690956	9.518757500141204	0.024866153537105525	6.8732938078384125	6.702573596338303	6.0	6.525289134725572	0.1889589258495152	6.0	6.0	6.0	6.0	0.0	1	0	0	1	0	1	0	1	1	1	0	1	1	0	1	1	10
0111011011101001	9.533950371954782	9.46558665385211	9.465981721983091	9.48850624926333	0.016067126039961237	6.787579547759725	6.6564521456385375	6.370873788891044	6.604968494096435	0.08698548456558935	6.0	6.0	6.0	6.0	0.0	0	1	1	1	0	1	1	0	1	1	1	0	1	0	0	1	10
0111000111011011	9.520705664834123	9.427177493225956	9.397730026838614	9.448537728299565	0.02621369431200824	6.8088685129807285	6.889015744736117	7.330937531360559	7.009607263025802	0.11477931775119474	6.0	6.0	6.0	6.0	0.0	0	1	1	1	0	0	0	1	1	1	0	1	1	0	1	1	10
1111101001101101	9.431836890652674	9.464542235180328	9.473008266483992	9.456462464105664	0.008876303401239568	6.0	6.0	6.0	6.0	0.0	6.0	6.0	6.0	6.0	0.0	1	1	1	1	1	0	1	0	0	1	1	0	1	1	0	1	11
0100110011101011	9.68118051153222	9.652475286432487	9.58959706859376	9.641084288852824	0.01912327497453707	6.0	6.0	6.0	6.0	0.0	6.0	6.0	6.0	6.0	0.0	0	1	0	0	1	1	0	0	1	1	1	0	1	0	1	1	9
1001011111100011	9.659510026441614	9.59018571452377	9.522567661768138	9.59075446757784	0.027953966387074817	6.0	6.0	6.0	6.0	0.0	6.0	6.0	6.0	6.0	0.0	1	0	0	1	0	1	1	1	1	1	1	0	0	0	1	1	10
1101011111100011	9.645084335398368	9.628913122028402	9.605365401334852	9.626454286253875	0.008154066836146246	6.0	6.0	6.0	6.0	0.0	6.0	6.0	6.0	6.0	0.0	1	1	0	1	0	1	1	1	1	1	1	0	0	0	1	1	11
1001010111111111	9.621705937142515	9.57764211831308	9.52547597869499	9.574941344716862	0.019666053066204458	6.8778409912657805	6.959764541702772	6.2640237281251965	6.7005430870312495	0.15523623398649794	6.0	6.0	6.0	6.0	0.0	1	0	0	1	0	1	0	1	1	1	1	1	1	1	1	1	12
1111011011110001	9.542139465356687	9.47866060112944	9.556143709423194	9.525647925303106	0.016856681107301742	6.847229754296539	6.826415933938535	7.064737821878411	6.912794503371161	0.05388781991124453	6.0	6.0	6.0	6.0	0.0	1	1	1	1	0	1	1	0	1	1	1	1	0	0	0	1	11
1001101111010011	9.58953944248565	9.570459300282634	9.473127397117956	9.54437537996208	0.025489276343655002	6.232427251034526	6.316967505377795	6.0	6.183131585470773	0.06700702307580102	6.0	6.0	6.0	6.0	0.0	1	0	0	1	1	0	1	1	1	1	0	1	0	0	1	1	10
1111011111101101	9.580907344128137	9.545845717358217	9.546582701260409	9.557778587582254	0.008178633961294765	6.7332436820002775	7.009321816551278	6.0	6.580855166183852	0.21295513109422162	6.0	6.0	6.0	6.0	0.0	1	1	1	1	0	1	1	1	1	1	1	0	1	1	0	1	13
1111110111010000	9.625930858625944	9.550973426227033	9.521634758580266	9.566179681144414	0.02195769327078708	8.424910294198622	8.57158448297212	8.582846597485576	8.526447124885438	0.03597222260594776	6.0	6.0	6.0	6.0	0.0	1	1	1	1	1	1	0	1	1	1	0	1	0	0	0	0	10
1111011001110011	9.48073228454491	9.520528813312154	9.476710095096392	9.492657064317818	0.00988829523554974	6.0	6.0	6.0	6.0	0.0	6.0	6.0	6.0	6.0	0.0	1	1	1	1	0	1	1	0	0	1	1	1	0	0	1	1	11
1111010001111101	9.526536593764684	9.534769688672096	9.43286843547857	9.498058239305117	0.02310926529607536	6.473396799299812	6.187952546433661	6.0	6.2204497819111575	0.09731237085804882	6.0	6.0	6.0	6.0	0.0	1	1	1	1	0	1	0	0	0	1	1	1	1	1	0	1	11
1111111101111101	9.610293446142522	9.585543338791648	9.58957944917785	9.595138744704007	0.005420966680865339	6.518891787816192	6.48527003232211	6.0	6.334720606712767	0.11854044248641352	6.0	6.0	6.0	6.0	0.0	1	1	1	1	1	1	1	1	0	1	1	1	1	1	0	1	14
1111011111111001	9.618227577634851	9.525032474891065	9.57818016999359	9.573813407506503	0.019085916512882006	6.784353950047161	6.99016412585907	6.989942375075572	6.921486816993934	0.048483811200464126	6.0	6.0	6.0	6.0	0.0	1	1	1	1	0	1	1	1	1	1	1	1	1	0	0	1	13
1111000011101101	9.578112995379119	9.53460107833683	9.480388329032984	9.531034134249644	0.01998778760771475	7.391004944814621	7.432183515581665	7.3212919417436835	7.38149346737999	0.022884079033643433	6.0	6.0	6.0	6.0	0.0	1	1	1	1	0	0	0	0	1	1	1	0	1	1	0	1	10
1001110101110011	9.5823837400018	9.551069735188578	9.509667511755188	9.547706995648523	0.01489067647620514	6.0	6.0	6.0	6.0	0.0	6.0	6.0	6.0	6.0	0.0	1	0	0	1	1	1	0	1	0	1	1	1	0	0	1	1	10
1111011111011101	9.527876999274019	9.59513562771433	9.539326499335855	9.554113042108069	0.0146907689853401	6.885377288713018	6.951318344798282	6.520241494708217	6.785645709406506	0.09479504523279111	6.0	6.0	6.0	6.0	0.0	1	1	1	1	0	1	1	1	1	1	0	1	1	1	0	1	13
1111000111010011	9.55062298545708	9.523650366074508	9.465155468480637	9.513142940004075	0.017837127087897624	7.6137706828947325	7.448212592327795	7.622415896784946	7.561466390669158	0.04008013235977289	6.0	6.0	6.0	6.0	0.0	1	1	1	1	0	0	0	1	1	1	0	1	0	0	1	1	10
1101101111011011	9.523679206494377	9.559050184370443	9.444534062807369	9.50908781789073	0.02393799974412783	6.917503621946478	6.937392531996478	6.850482585908022	6.90179291328366	0.01858966763774327	6.0	6.0	6.0	6.0	0.0	1	1	0	1	1	0	1	1	1	1	0	1	1	0	1	1	12
1111101111101111	9.583183194604917	9.540942997645903	9.490322646053102	9.538149612767974	0.018980791249063714	7.540645190853316	7.475068899331113	7.53044999048118	7.5153880268885365	0.014406072578955632	6.0	6.0	6.0	6.0	0.0	1	1	1	1	1	0	1	1	1	1	1	0	1	1	1	1	14
1001010011111001	9.576105203926092	9.526246234207438	9.478847832832836	9.527066423655455	0.01985469546077548	6.433590767154987	6.412662227505447	6.0	6.282084331553477	0.09982332603483762	6.0	6.0	6.0	6.0	0.0	1	0	0	1	0	1	0	0	1	1	1	1	1	0	0	1	9
1111000101011011	9.533521812659119	9.555834914425548	9.478471415325627	9.52260938080343	0.016256222526567197	6.0	6.0	6.0	6.0	0.0	6.0	6.0	6.0	6.0	0.0	1	1	1	1	0	0	0	1	0	1	0	1	1	0	1	1	10
1001000111010011	9.589293540161126	9.485152229541269	9.438932101770316	9.504459290490903	0.03144230825555228	6.0	6.0	6.0	6.0	0.0	6.0	6.0	6.0	6.0	0.0	1	0	0	1	0	0	0	1	1	1	0	1	0	0	1	1	8
1111000111010111	9.530445004011913	9.504936687804378	9.48091440167756	9.505432031164617	0.010111908537992301	7.662492320147492	7.786187305291428	7.713680185311285	7.720786603583401	0.02537383239656335	6.0	6.0	6.0	6.0	0.0	1	1	1	1	0	0	0	1	1	1	0	1	0	1	1	1	11
1111000101110111	9.501921760574238	9.489446307248414	9.451799027488255	9.481055698436968	0.010652650923378994	6.0	6.0	6.0	6.0	0.0	6.0	6.0	6.0	6.0	0.0	1	1	1	1	0	0	0	1	0	1	1	1	0	1	1	1	11
1011000011001111	9.575155538124706	9.454267330413641	9.475850417500801	9.50175776201305	0.026321355606096872	6.912178201635581	6.598517439106639	6.716906532472076	6.742534057738099	0.06466367608119825	6.0	6.0	6.0	6.0	0.0	1	0	1	1	0	0	0	0	1	1	0	0	1	1	1	1	9
1101011111111101	9.601103137287977	9.597132572930207	9.563278420872289	9.587171377030158	0.008486227673915518	6.208882928201686	6.0	6.0	6.069627642733895	0.04923417833517168	6.0	6.0	6.0	6.0	0.0	1	1	0	1	0	1	1	1	1	1	1	1	1	1	0	1	13
1111000001001111	9.50959813827322	9.500617965339279	9.466115785083602	9.492110629565367	0.00937158676714041	6.0	6.0	6.0	6.0	0.0	6.0	6.0	6.0	6.0	0.0	1	1	1	1	0	0	0	0	0	1	0	0	1	1	1	1	9
1101111010001101	9.557109023779127	9.492808605898603	9.482579693907473	9.510832441195069	0.01649393439962608	6.0	6.0	6.0	6.0	0.0	6.0	6.0	6.0	6.0	0.0	1	1	0	1	1	1	1	0	1	0	0	0	1	1	0	1	10
1101101001000011	9.401608448481602	9.4597470100499	9.38057238296966	9.413975947167055	0.016742519031519628	6.0	6.0	6.0	6.0	0.0	6.0	6.0	6.0	6.0	0.0	1	1	0	1	1	0	1	0	0	1	0	0	0	0	1	1	8
1101110110111111	9.52141862377504	9.518396930986242	9.503320870542886	9.514378808434723	0.003957927690981926	6.0	6.0	6.0	6.0	0.0	6.0	6.0	6.0	6.0	0.0	1	1	0	1	1	1	0	1	1	0	1	1	1	1	1	1	13
1101101011011101	9.574380776595042	9.526299627366775	9.510606037302244	9.537095480421355	0.01356599409889873	7.094274558191706	6.867332652983157	7.0102554655571785	6.990620892244014	0.046841567076002864	6.0	6.0	6.0	6.0	0.0	1	1	0	1	1	0	1	0	1	1	0	1	1	1	0	1	11
1001000011111011	9.579924210874674	9.567259567439617	9.475249581786887	9.540811120033727	0.023323217228415332	6.0	6.237142013125426	6.0	6.079047337708475	0.055894908528405896	6.0	6.0	6.0	6.0	0.0	1	0	0	1	0	0	0	0	1	1	1	1	1	0	1	1	9
1111111101010111	9.56878597911042	9.605980264868998	9.541184360615347	9.571983534864922	0.013274634797954961	6.0	6.0	6.0	6.0	0.0	6.0	6.0	6.0	6.0	0.0	1	1	1	1	1	1	1	1	0	1	0	1	0	1	1	1	13
1111100011111101	9.569130394970562	9.568370006035913	9.583709489512588	9.573736630173022	0.003529352877135562	8.453472221573042	8.02073929271972	8.167473572085353	8.213895028792704	0.0898430674942129	6.0	6.0	6.0	6.0	0.0	1	1	1	1	1	0	0	0	1	1	1	1	1	1	0	1	12
1111111111011001	9.567502361455311	9.607315426721057	9.609262284260732	9.594693357479033	0.009621679185927762	8.492015622262942	8.54842044761276	8.759015310178084	8.599817126684597	0.05745059080259858	7.661662400383332	7.647711971936898	7.388156705581929	7.565843692634053	0.06288634276640936	1	1	1	1	1	1	1	1	1	1	0	1	1	0	0	1	13
1111000110101101	9.401056676925766	9.390081952626057	9.32983287365275	9.373657167734857	0.015655338318552037	6.0	6.0	6.0	6.0	0.0	6.0	6.0	6.0	6.0	0.0	1	1	1	1	0	0	0	1	1	0	1	0	1	1	0	1	10
1111101110010111	9.386067720566578	9.341124749869053	9.384230366653547	9.370474279029727	0.010383401127242545	6.0	6.0	6.0	6.0	0.0	6.0	6.0	6.0	6.0	0.0	1	1	1	1	1	0	1	1	1	0	0	1	0	1	1	1	12
1110010111011111	9.561310419508017	9.553657955432303	9.46771141743242	9.527559930790913	0.021217223604985784	6.0	6.0	6.0	6.0	0.0	6.0	6.0	6.0	6.0	0.0	1	1	1	0	0	1	0	1	1	1	0	1	1	1	1	1	12
1111010011111011	9.558284329122118	9.524251379139443	9.549383080598973	9.543972929620177	0.007205469234556499	8.064565623001604	7.841047702668568	7.990215265910635	7.965276197193603	0.04646958331148089	6.0	6.0	6.0	6.0	0.0	1	1	1	1	0	1	0	0	1	1	1	1	1	0	1	1	12
1111001001111101	9.472488501036768	9.413089458127233	9.421529309089022	9.435702422751008	0.013119447636993279	6.0	6.0	6.0	6.0	0.0	6.0	6.0	6.0	6.0	0.0	1	1	1	1	0	0	1	0	0	1	1	1	1	1	0	1	11
0011010111011111	9.56605989356517	9.477387458800765	9.428241211685373	9.490562854683768	0.028515173040788145	6.770166048251499	7.124258115915315	6.899306525543358	6.931243563236724	0.07315540408163027	6.0	6.0	6.0	6.0	0.0	0	0	1	1	0	1	0	1	1	1	0	1	1	1	1	1	11
1111110001011111	9.543988674671136	9.613540768503398	9.51990783490179	9.559145759358774	0.019849787890898564	6.88601718990979	6.760900970219293	6.0465212240504345	6.5644797947265054	0.1848983179164561	6.0	6.0	6.0	6.0	0.0	1	1	1	1	1	1	0	0	0	1	0	1	1	1	1	1	12
1111101101011011	9.460517952347676	9.53240122992158	9.366620724478354	9.453179968915869	0.03393910845638851	6.0	6.0	6.0	6.0	0.0	6.0	6.0	6.0	6.0	0.0	1	1	1	1	1	0	1	1	0	1	0	1	1	0	1	1	12
1111000011110011	9.544713470303034	9.496042864421238	9.535157559277298	9.525304631333857	0.010527876574593633	7.67256960846554	7.6696704339452015	7.502599577451369	7.614946539954037	0.039725057774043816	6.0	6.0	6.0	6.0	0.0	1	1	1	1	0	0	0	0	1	1	1	1	0	0	1	1	10
1101011111011011	9.593921883358384	9.619162966654542	9.532283860506908	9.581789570173278	0.01824549962168341	6.0	6.0	6.0	6.0	0.0	6.0	6.0	6.0	6.0	0.0	1	1	0	1	0	1	1	1	1	1	0	1	1	0	1	1	12
1111101011011011	9.52644749329253	9.471651172926393	9.517701240149664	9.505266635456195	0.012018206513655308	7.8056834135208	7.648865623804338	7.844545652164836	7.766364896496658	0.042292882991753	6.0	6.0	6.0	6.0	0.0	1	1	1	1	1	0	1	0	1	1	0	1	1	0	1	1	12
1101100111011011	9.591839137867408	9.544696533147047	9.476871811970684	9.53780249432838	0.02359384571728362	7.013653062318904	6.921371500790768	6.9648882213206305	6.966637594810101	0.018847046100216286	6.0	6.0	6.0	6.0	0.0	1	1	0	1	1	0	0	1	1	1	0	1	1	0	1	1	11
1101101011110111	9.604334500312454	9.565987525965935	9.515342699190516	9.561888241822968	0.01822310010488178	6.885867251402402	6.971299247337973	7.028572624514153	6.961913041084844	0.02931803065694876	6.0	6.0	6.0	6.0	0.0	1	1	0	1	1	0	1	0	1	1	1	1	0	1	1	1	12
0011011101011011	9.543621191175674	9.506067712524418	9.384304364873568	9.47799775619122	0.0340009917065042	6.0	6.0	6.0	6.0	0.0	6.0	6.0	6.0	6.0	0.0	0	0	1	1	0	1	1	1	0	1	0	1	1	0	1	1	10
1111111111110010	9.613506332222542	9.490080775589462	9.619854670873675	9.574480592895226	0.029867965620494305	8.269420804331558	7.9977669304979635	8.313066570604228	8.193418101811249	0.06974450259766932	6.0	6.0	6.0	6.0	0.0	1	1	1	1	1	1	1	1	1	1	1	1	0	0	1	0	13
1111111101010011	9.55958224726057	9.58216158913174	9.486502344640877	9.54274872701106	0.020413224133445103	6.0	6.0	6.0	6.0	0.0	6.0	6.0	6.0	6.0	0.0	1	1	1	1	1	1	1	1	0	1	0	1	0	0	1	1	12
1101000011011101	9.568056663455273	9.485951846495343	9.544300279717099	9.532769596555905	0.017248273984318867	7.0857028989860416	6.918216093845077	6.268242753863722	6.75738724889828	0.17628561590075034	6.0	6.0	6.0	6.0	0.0	1	1	0	1	0	0	0	0	1	1	0	1	1	1	0	1	9
1111110011000010	9.525307676694807	9.592176233674193	9.541722176026742	9.553068695465248	0.014226785802683687	7.522103116968834	7.430826335136556	7.48291337021659	7.4786142741073265	0.018693690539554674	6.0	6.0	6.0	6.0	0.0	1	1	1	1	1	1	0	0	1	1	0	0	0	0	1	0	9
1101110111101011	9.575691353111553	9.616467593751992	9.527908801578523	9.573355916147355	0.018095835695753418	7.7800207075059875	7.825482137576759	8.10211748090781	7.902540108663518	0.07116884974009821	6.0	6.0	6.0	6.0	0.0	1	1	0	1	1	1	0	1	1	1	1	0	1	0	1	1	12
1101110110001101	9.491552344137052	9.514009878616212	9.49854125480929	9.501367825854183	0.004691789666082505	6.0	6.0	6.0	6.0	0.0	6.0	6.0	6.0	6.0	0.0	1	1	0	1	1	1	0	1	1	0	0	0	1	1	0	1	10
1111011101111011	9.465460671100002	9.624969404521341	9.48448988232152	9.524973319314286	0.03556669910764008	6.0	6.0	6.0	6.0	0.0	6.0	6.0	6.0	6.0	0.0	1	1	1	1	0	1	1	1	0	1	1	1	1	0	1	1	13
1001111111101101	9.600976346395141	9.613501031038977	9.556779762847922	9.59041904676068	0.012164963337245973	7.455620633878671	7.203394268529606	7.264083284672663	7.307699395693646	0.05374524583586612	6.0	6.0	6.0	6.0	0.0	1	0	0	1	1	1	1	1	1	1	1	0	1	1	0	1	12
1101101001111110	9.615713065061858	9.553730867938773	9.43147852686416	9.53364081995493	0.038271614344543035	6.0	6.0	6.0	6.0	0.0	6.0	6.0	6.0	6.0	0.0	1	1	0	1	1	0	1	0	0	1	1	1	1	1	1	0	11
1101011011001101	9.623769307589056	9.513290001448864	9.59776206988507	9.57827379297433	0.02358058514264376	6.0	6.0	6.0	6.0	0.0	6.0	6.0	6.0	6.0	0.0	1	1	0	1	0	1	1	0	1	1	0	0	1	1	0	1	10
1101111001011011	9.56421576780992	9.620182745908169	9.531936044178966	9.572111519299018	0.018228307931181808	6.0	6.0	6.0	6.0	0.0	6.0	6.0	6.0	6.0	0.0	1	1	0	1	1	1	1	0	0	1	0	1	1	0	1	1	11
1111000011010111	9.569604779663743	9.46106128014617	9.480784689221943	9.503816916343952	0.023605385813870963	7.6869153664096395	7.621191139394567	7.535055717429409	7.614387407744538	0.031091414464376643	6.0	6.0	6.0	6.0	0.0	1	1	1	1	0	0	0	0	1	1	0	1	0	1	1	1	10
1011101010110001	9.424202719701816	9.419696614188348	9.394350127947275	9.412749820612481	0.006569979253583566	6.0	6.0	6.0	6.0	0.0	6.0	6.0	6.0	6.0	0.0	1	0	1	1	1	0	1	0	1	0	1	1	0	0	0	1	9
1111100101110101	9.573679938979248	9.45415679122837	9.430568925310096	9.486135218505906	0.03132399351059699	6.0	6.0	6.0	6.0	0.0	6.0	6.0	6.0	6.0	0.0	1	1	1	1	1	0	0	1	0	1	1	1	0	1	0	1	11
1111000001011011	9.541100658375122	9.507937101323524	9.48370728949276	9.510915016397135	0.011762586744674524	6.0	6.0	6.0	6.0	0.0	6.0	6.0	6.0	6.0	0.0	1	1	1	1	0	0	0	0	0	1	0	1	1	0	1	1	9
1101000011101111	9.576806310803734	9.56160043612568	9.533500755312044	9.557302500747152	0.008969364251898978	6.80739764108768	6.9503329450597855	6.895523520151273	6.884418035432913	0.029439554241195827	6.0	6.0	6.0	6.0	0.0	1	1	0	1	0	0	0	0	1	1	1	0	1	1	1	1	10
1111000110011101	9.457168380330977	9.38959513991018	9.442172291785017	9.42964527067539	0.0144869504419925	6.0	6.0	6.0	6.0	0.0	6.0	6.0	6.0	6.0	0.0	1	1	1	1	0	0	0	1	1	0	0	1	1	1	0	1	10
1110010011110111	9.57767858966359	9.507160531981457	9.504768361311081	9.529869160985376	0.016910237151067008	6.0	6.0	6.0	6.0	0.0	6.0	6.0	6.0	6.0	0.0	1	1	1	0	0	1	0	0	1	1	1	1	0	1	1	1	11
1101010101111101	9.503765055891053	9.537322728745275	9.47914946813334	9.506745750923223	0.011921237839196519	6.0	6.0	6.0	6.0	0.0	6.0	6.0	6.0	6.0	0.0	1	1	0	1	0	1	0	1	0	1	1	1	1	1	0	1	11
1101010011000101	9.5670771266707	9.498244620814662	9.578673502785048	9.547998416756803	0.017749174359837805	6.896427669872817	6.7724521758273255	6.7708782496415525	6.813252698447232	0.029408548118545274	6.0	6.0	6.0	6.0	0.0	1	1	0	1	0	1	0	0	1	1	0	0	0	1	0	1	8
1111101111010001	9.462155819428267	9.483961303152967	9.47057366542821	9.472230262669816	0.004489395206719693	7.7277169681820785	7.479897183203287	7.641770499606202	7.616461550330523	0.05137130950542476	6.0	6.0	6.0	6.0	0.0	1	1	1	1	1	0	1	1	1	1	0	1	0	0	0	1	11
1101110101011011	9.621929839269919	9.5795794889861	9.502749572503788	9.568086300253269	0.024664596885170916	6.0	6.0	6.0	6.0	0.0	6.0	6.0	6.0	6.0	0.0	1	1	0	1	1	1	0	1	0	1	0	1	1	0	1	1	11
1011011111011001	9.582819311471123	9.546940060044266	9.514615123113417	9.548124831542935	0.013928421722096428	6.0	6.0	6.0	6.0	0.0	6.0	6.0	6.0	6.0	0.0	1	0	1	1	0	1	1	1	1	1	0	1	1	0	0	1	11
1001000011110011	9.595817450758188	9.447500740954572	9.505431895931935	9.516250029214898	0.030515667034979765	6.092697663095144	6.381196120043085	6.0	6.15796459437941	0.08116079690284	6.0	6.0	6.0	6.0	0.0	1	0	0	1	0	0	0	0	1	1	1	1	0	0	1	1	8
0111011101110011	9.589820770646817	9.470096849385243	9.352511649766447	9.470809756599502	0.04844117719938907	6.0	6.0	6.0	6.0	0.0	6.0	6.0	6.0	6.0	0.0	0	1	1	1	0	1	1	1	0	1	1	1	0	0	1	1	11
0101011111011111	9.526478285914065	9.53701586169192	9.46686652079937	9.510120222801786	0.015443025278443217	6.0	6.0	6.0	6.0	0.0	6.0	6.0	6.0	6.0	0.0	0	1	0	1	0	1	1	1	1	1	0	1	1	1	1	1	12
1011110101011011	9.643106739824653	9.61319180539187	9.504602660831901	9.586967068682808	0.029753564453138114	6.0	6.0	6.0	6.0	0.0	6.0	6.0	6.0	6.0	0.0	1	0	1	1	1	1	0	1	0	1	0	1	1	0	1	1	11
1111111001110011	9.584322886900166	9.561476449648273	9.538009915012513	9.561269750520317	0.009453878257658479	6.643744776200653	6.430476118290248	6.0	6.358073631496967	0.133873960806297	6.0	6.0	6.0	6.0	0.0	1	1	1	1	1	1	1	0	0	1	1	1	0	0	1	1	12
1111011010111000	9.3914974926647	9.418061505020797	9.439908584550373	9.416489194078624	0.009897496111516874	6.0	6.0	6.0	6.0	0.0	6.0	6.0	6.0	6.0	0.0	1	1	1	1	0	1	1	0	1	0	1	1	1	0	0	0	10
1110010011010001	9.469897044956278	9.507538806594443	9.425250808832477	9.467562220127734	0.01681723916676645	6.0	6.0	6.0	6.0	0.0	6.0	6.0	6.0	6.0	0.0	1	1	1	0	0	1	0	0	1	1	0	1	0	0	0	1	8
1111110011010001	9.572949893115588	9.510517883364926	9.554271781740766	9.54591318607376	0.013082039542314334	8.686942832452795	8.888632386191002	8.674041753462522	8.74987232403544	0.04912971876715765	7.554191162740756	7.1963904012154725	7.592237541550675	7.447606368502302	0.08915714441369779	1	1	1	1	1	1	0	0	1	1	0	1	0	0	0	1	10
1111010011110001	9.56497058324763	9.476042858484023	9.482018160956297	9.507677200895984	0.020292957751716845	8.135080042667552	7.909944387058727	7.8769063702940665	7.973976933340115	0.057356395333856044	6.0	6.0	6.0	6.0	0.0	1	1	1	1	0	1	0	0	1	1	1	1	0	0	0	1	10
1111000111011111	9.517494099178426	9.481875839703756	9.480288315316866	9.49321941806635	0.008588511374112094	7.4324922431646145	7.52925004181288	7.792402185740469	7.584714823572654	0.07603842033580059	6.0	6.0	6.0	6.0	0.0	1	1	1	1	0	0	0	1	1	1	0	1	1	1	1	1	12
1100010111011011	9.536647799981317	9.523992022126386	9.518675730716627	9.52643851760811	0.0037691250868134418	6.0	6.0	6.0	6.0	0.0	6.0	6.0	6.0	6.0	0.0	1	1	0	0	0	1	0	1	1	1	0	1	1	0	1	1	10
0110010011110011	9.591062667439084	9.461614371736776	9.480686927463529	9.51112132221313	0.028530406595096054	6.0	6.0	6.0	6.0	0.0	6.0	6.0	6.0	6.0	0.0	0	1	1	0	0	1	0	0	1	1	1	1	0	0	1	1	9
0101110011111101	9.611853335247439	9.529078775073252	9.443317136838743	9.528083082386479	0.03440410851545361	8.579688604955955	8.322850844222053	8.241743687387228	8.381427712188412	0.07202445062059898	6.0	6.0	6.0	6.0	0.0	0	1	0	1	1	1	0	0	1	1	1	1	1	1	0	1	11
0011011001110011	9.567334621705617	9.43685047479958	9.319674954049567	9.441286683518255	0.05057764279917071	6.0	6.0	6.0	6.0	0.0	6.0	6.0	6.0	6.0	0.0	0	0	1	1	0	1	1	0	0	1	1	1	0	0	1	1	9
1011000111011011	9.539694502990224	9.497855609497943	9.505829296915437	9.514459803134535	0.009069063534557416	7.058243726313621	6.947553631741292	7.176442974174687	7.060746777409867	0.04673022169590541	6.0	6.0	6.0	6.0	0.0	1	0	1	1	0	0	0	1	1	1	0	1	1	0	1	1	10
1111011101010011	9.521721462061613	9.496411023360874	9.496263573049287	9.504798686157258	0.005983180503577825	6.0	6.0	6.0	6.0	0.0	6.0	6.0	6.0	6.0	0.0	1	1	1	1	0	1	1	1	0	1	0	1	0	0	1	1	11
1011101101010111	9.458560821440106	9.535667747814037	9.323973418370118	9.439400662541418	0.04373967696581822	6.0	6.0	6.0	6.0	0.0	6.0	6.0	6.0	6.0	0.0	1	0	1	1	1	0	1	1	0	1	0	1	0	1	1	1	11
1010010111011011	9.58158727978746	9.519165517589688	9.462816897072736	9.521189898149961	0.02425446536221074	6.0	6.0	6.0	6.0	0.0	6.0	6.0	6.0	6.0	0.0	1	0	1	0	0	1	0	1	1	1	0	1	1	0	1	1	10
1101011110010111	9.398530826689363	9.386210625770977	9.419581230643061	9.4014408943678	0.006889009215192113	6.0	6.0	6.0	6.0	0.0	6.0	6.0	6.0	6.0	0.0	1	1	0	1	0	1	1	1	1	0	0	1	0	1	1	1	11
1111111110011011	9.537209060990673	9.467032346768713	9.497919777460265	9.500720395073218	0.014358942620124328	6.308278150368991	6.100840678443122	6.254342994857263	6.2211539412231245	0.043938804320319824	6.0	6.0	6.0	6.0	0.0	1	1	1	1	1	1	1	1	1	0	0	1	1	0	1	1	13
1111111101010001	9.591856281955213	9.609513207155407	9.551359610574508	9.584243033228375	0.012171903206127396	6.0	6.0	6.0	6.0	0.0	6.0	6.0	6.0	6.0	0.0	1	1	1	1	1	1	1	1	0	1	0	1	0	0	0	1	11
1111011101110011	9.511911181555922	9.535717577609066	9.467441436080172	9.505023398415053	0.014147962414927034	6.0	6.0	6.0	6.0	0.0	6.0	6.0	6.0	6.0	0.0	1	1	1	1	0	1	1	1	0	1	1	1	0	0	1	1	12
1101110110011011	9.488046243376884	9.552200410873256	9.38167403493557	9.473973563061904	0.03516234129255821	6.0	6.0	6.0	6.0	0.0	6.0	6.0	6.0	6.0	0.0	1	1	0	1	1	1	0	1	1	0	0	1	1	0	1	1	11
1101111111101011	9.604799390066797	9.669668483597091	9.579862123312015	9.618109998991967	0.018926061482262772	7.406991022258426	7.334397536471314	7.438969197985486	7.393452585571741	0.021875690651566373	6.0	6.0	6.0	6.0	0.0	1	1	0	1	1	1	1	1	1	1	1	0	1	0	1	1	13
1101110101111101	9.58380582180581	9.576765018186114	9.468429766226725	9.543000202072884	0.026403773895718255	6.0	6.0	6.0	6.0	0.0	6.0	6.0	6.0	6.0	0.0	1	1	0	1	1	1	0	1	0	1	1	1	1	1	0	1	12
0101011001101101	9.575746113784009	9.453720074807055	9.490350529141509	9.506605572577525	0.02556285839172166	6.0	6.0	6.0	6.0	0.0	6.0	6.0	6.0	6.0	0.0	0	1	0	1	0	1	1	0	0	1	1	0	1	1	0	1	9
1111010101110001	9.511314554093863	9.516933533949798	9.482067593258279	9.50343856043398	0.007642337253463131	6.0	6.0	6.0	6.0	0.0	6.0	6.0	6.0	6.0	0.0	1	1	1	1	0	1	0	1	0	1	1	1	0	0	0	1	10
1011111111011101	9.595879316477664	9.62746087009221	9.495867210584821	9.5730691323849	0.028045947952708122	7.865917574414129	7.8429379524059275	8.000218705481009	7.903024744100354	0.03468192457548545	8.115684039971251	7.564268792630063	8.15709828262294	7.945683705074752	0.13511525108217495	1	0	1	1	1	1	1	1	1	1	0	1	1	1	0	1	13
1111110001101001	9.60906687634256	9.552150198471255	9.510871048391847	9.557362707735221	0.02012868122171155	6.493625161615902	6.659577769440392	6.0	6.384400977018764	0.14006436042088702	6.0	6.0	6.0	6.0	0.0	1	1	1	1	1	1	0	0	0	1	1	0	1	0	0	1	10
1111011111101110	9.609261195586534	9.582450773984693	9.538137955176683	9.576616641582637	0.014663768599640878	6.0848792468336335	6.494016740960808	6.0	6.192965329264813	0.1078386804435792	6.0	6.0	6.0	6.0	0.0	1	1	1	1	0	1	1	1	1	1	1	0	1	1	1	0	13
1001010111001011	9.653921863130966	9.5300473629241	9.462250167005168	9.548739797686745	0.03967905642349184	6.904138549442068	6.932918999034422	6.527489922647157	6.788182490374549	0.09235577920999335	6.0	6.0	6.0	6.0	0.0	1	0	0	1	0	1	0	1	1	1	0	0	1	0	1	1	9
1001000111011011	9.601602866618103	9.528125169336914	9.52462214842792	9.55145006146098	0.017746106087996587	6.0	6.0	6.0	6.0	0.0	6.0	6.0	6.0	6.0	0.0	1	0	0	1	0	0	0	1	1	1	0	1	1	0	1	1	9
0101010001111011	9.575034501178019	9.49187036745091	9.405402168728836	9.490769012452589	0.03462824422866823	6.0	6.0112502201623785	6.0	6.003750073387459	0.0026517023222198273	6.0	6.0	6.0	6.0	0.0	0	1	0	1	0	1	0	0	0	1	1	1	1	0	1	1	9
1111111001011101	9.608405315758414	9.560236499296542	9.548554822481616	9.572398879178857	0.01295159578115333	6.0		6.0	6.0	0.0	6.0	6.0	6.0	6.0	0.0	1	1	1	1	1	1	1	0	0	1	0	1	1	1	0	1	12
1111101111010101	9.538574693948878	9.536227121829278	9.501268070773706	9.525356628850622	0.008530062000388456	7.876423776557975	7.882637629923974	7.968181907139511	7.909081104540487	0.020933751233753784	6.0	6.0	6.0	6.0	0.0	1	1	1	1	1	0	1	1	1	1	0	1	0	1	0	1	12
1110010111010011	9.539910591956637	9.557747817651538	9.456931718843586	9.518196709483922	0.021964330795416542	6.0	6.0	6.0	6.0	0.0	6.0	6.0	6.0	6.0	0.0	1	1	1	0	0	1	0	1	1	1	0	1	0	0	1	1	10
1000010111011111	9.581704858691136	9.536774851296961	9.482268468811368	9.533582726266488	0.02032872005619124	6.0	6.0	6.0	6.0	0.0	6.0	6.0	6.0	6.0	0.0	1	0	0	0	0	1	0	1	1	1	0	1	1	1	1	1	10
1111110110110110	9.507048992894376	9.543758560870591	9.470857952228512	9.50722183533116	0.01488089989985696	6.534615293427661	6.709220111596851	6.0	6.4146118016748375	0.15085805701498292	6.0	6.0	6.0	6.0	0.0	1	1	1	1	1	1	0	1	1	0	1	1	0	1	1	0	12
1111011111011011	9.59762103840343	9.600553193370077	9.443672525850818	9.547282252541441	0.03663645948565985	6.636428417722322	7.041607350634173	6.426188088107097	6.70140795215453	0.12770537191364376	6.0	6.0	6.0	6.0	0.0	1	1	1	1	0	1	1	1	1	1	0	1	1	0	1	1	13
1111011010011011	9.444865765023025	9.383804660342063	9.345869065846813	9.3915131637373	0.020390571270369556	6.0	6.0	6.0	6.0	0.0	6.0	6.0	6.0	6.0	0.0	1	1	1	1	0	1	1	0	1	0	0	1	1	0	1	1	11
1011110111110011	9.59894437320116	9.565971564320696	9.538689851614649	9.567868596378835	0.012317676261353338	8.303946183885595	8.068094200195553	8.397438284976197	8.25649288968578	0.06928893958491317	7.651051949100263	7.904842366177722	7.6429583076309635	7.732950874302983	0.06079527187242315	1	0	1	1	1	1	0	1	1	1	1	1	0	0	1	1	12
0011111111111101	9.575926372364133	9.50204602479052	9.392799891237383	9.49025742946401	0.03761217723312415	6.858338375378535	7.117567219728636	7.097572882816241	7.0244928259744706	0.058886075698150006	6.0	6.0	6.0	6.0	0.0	0	0	1	1	1	1	1	1	1	1	1	1	1	1	0	1	13
1111011011001011	9.543611153797842	9.602462887503938	9.559713553241568	9.568595864847783	0.012416744303934354	6.0	6.0	6.0	6.0	0.0	6.0	6.0	6.0	6.0	0.0	1	1	1	1	0	1	1	0	1	1	0	0	1	0	1	1	11
1101000101011111	9.434749901481172	9.53440236279759	9.42788793344794	9.4656800659089	0.02433734174256063	6.0	6.0	6.0	6.0	0.0	6.0	6.0	6.0	6.0	0.0	1	1	0	1	0	0	0	1	0	1	0	1	1	1	1	1	10
1111010101101101	9.5426223725322	9.472924931943812	9.457301690215148	9.490949664897053	0.01854531817058143	6.0	6.0	6.0	6.0	0.0	6.0	6.0	6.0	6.0	0.0	1	1	1	1	0	1	0	1	0	1	1	0	1	1	0	1	11
1101111101010001	9.63949874440888	9.547630997619214	9.55089569831719	9.579341813448428	0.02127912445174596	6.0	6.0	6.0	6.0	0.0	6.0	6.0	6.0	6.0	0.0	1	1	0	1	1	1	1	1	0	1	0	1	0	0	0	1	10
1001011111101101	9.706173193107595	9.530345000065187	9.525517453022296	9.58734521539836	0.04202358964015095	6.0	6.0	6.0	6.0	0.0	6.0	6.0	6.0	6.0	0.0	1	0	0	1	0	1	1	1	1	1	1	0	1	1	0	1	11
1111110001001101	9.579872971546068	9.536672137082183	9.521146795622514	9.545897301416922	0.012423222055243145	6.067826724624728	6.0	6.0	6.022608908208244	0.015986912309272676	6.0	6.0	6.0	6.0	0.0	1	1	1	1	1	1	0	0	0	1	0	0	1	1	0	1	10
1101111111011011	9.601516736843669	9.61150401465759	9.5021897803043	9.571736843935186	0.024672967576857607	7.478725837396731	7.5015364318896065	7.538535795369485	7.506266021551942	0.012322638597017259	6.0	6.0	6.0	6.0	0.0	1	1	0	1	1	1	1	1	1	1	0	1	1	0	1	1	13
1111011111111101	9.620574461130454	9.582714616769518	9.54967826394814	9.584322447282704	0.014482785948312033	6.969285374603982	7.054822892136127	7.1930468688405895	7.072385045193566	0.046095233829467196	6.0	6.0	6.0	6.0	0.0	1	1	1	1	0	1	1	1	1	1	1	1	1	1	0	1	14
1111010011110110	9.606320474535046	9.477545962414682	9.474069099595956	9.519311845515228	0.030770381556231078	7.2780554329409055	7.466663343336049	7.342836854195004	7.362518543490652	0.03912322974920285	6.0	6.0	6.0	6.0	0.0	1	1	1	1	0	1	0	0	1	1	1	1	0	1	1	0	11
1001000111011110	9.615637215520566	9.531316849128087	9.49471711498457	9.547223726544408	0.025315309071331404	6.0	6.0	6.0	6.0	0.0	6.0	6.0	6.0	6.0	0.0	1	0	0	1	0	0	0	1	1	1	0	1	1	1	1	0	9
1111101010000010	9.467242865955617	9.486759527776963	9.47398506663155	9.475995820121376	0.004046755271404239	6.0	6.0	6.0	6.0	0.0	6.0	6.0	6.0	6.0	0.0	1	1	1	1	1	0	1	0	1	0	0	0	0	0	1	0	8
1101000111000111	9.575371343561851	9.55244047389351	9.576989583933962	9.568267133796441	0.0056053106996515195	6.94829968718864	6.601943894474907	6.531619072668169	6.693954218110572	0.09106326406308976	6.0	6.0	6.0	6.0	0.0	1	1	0	1	0	0	0	1	1	1	0	0	0	1	1	1	9
0010010111011111	9.589257920614054	9.467784717658146	9.402553478778868	9.486532039017023	0.03868297147722503	6.0	6.0	6.0	6.0	0.0	6.0	6.0	6.0	6.0	0.0	0	0	1	0	0	1	0	1	1	1	0	1	1	1	1	1	10
1101101011001111	9.497294842518151	9.548182472278368	9.536264120183512	9.527247144993344	0.010865596293180806	6.9906931559981755	7.073986791034295	7.2195831365451575	7.0947543611925425	0.04729539226395414	6.0	6.0	6.0	6.0	0.0	1	1	0	1	1	0	1	0	1	1	0	0	1	1	1	1	11
0111011011011101	9.55877414541713	9.460463211555998	9.41854142675134	9.479259594574822	0.029386169811218124	6.588963224227992	6.530112989230799	6.306151288956441	6.475075834138411	0.06091998032050976	6.0	6.0	6.0	6.0	0.0	0	1	1	1	0	1	1	0	1	1	0	1	1	1	0	1	11
1111101011011100	9.516418994352078	9.568779018672002	9.564327873108358	9.549841962044146	0.011851682378576405	7.480656011547487	7.30147383284288	7.335018282288215	7.372382708892861	0.03888795566100328	6.0	6.0	6.0	6.0	0.0	1	1	1	1	1	0	1	0	1	1	0	1	1	1	0	0	11
1101000111101111	9.532861345871869	9.529543294595868	9.576560363485733	9.54632166798449	0.010712425770106209	6.982946031245887	6.746468529838219	6.930368724221187	6.886594428435097	0.050691129889227894	6.0	6.0	6.0	6.0	0.0	1	1	0	1	0	0	0	1	1	1	1	0	1	1	1	1	11
1100010011011101	9.500565822001745	9.556489523422066	9.469698444928373	9.508917930117395	0.017960563785723367	6.0	6.0	6.0	6.0	0.0	6.0	6.0	6.0	6.0	0.0	1	1	0	0	0	1	0	0	1	1	0	1	1	1	0	1	9
1111111101111110	9.651254751839918	9.740076468214141	9.584576034109055	9.658635751387704	0.031848484049377915	6.0	6.0477097952934376	6.0	6.015903265097812	0.011245306593670575	6.0	6.0	6.0	6.0	0.0	1	1	1	1	1	1	1	1	0	1	1	1	1	1	1	0	14
1101110111000001	9.62653520224316	9.592192466809092	9.548308722698312	9.589012130583521	0.016007453625191088	7.9187269677157825	7.649369287931504	7.709806127808349	7.759300794485212	0.057699915419901666	6.0	6.0	6.0	6.0	0.0	1	1	0	1	1	1	0	1	1	1	0	0	0	0	0	1	9
1011010111111001	9.592279255451967	9.496119391046813	9.547091626705466	9.545163424401416	0.019640385067925734	7.366712054194419	7.3815111120069155	7.4036809080168755	7.383968024739403	0.007596066453191738	6.271754581259768	6.0	6.205060098975289	6.158938226745018	0.05781876631976416	1	0	1	1	0	1	0	1	1	1	1	1	1	0	0	1	11
1001011111011101	9.581970383810427	9.538314133770774	9.445212482929863	9.521832333503689	0.028517299335513394	6.0	6.0	6.0	6.0	0.0	6.0	6.0	6.0	6.0	0.0	1	0	0	1	0	1	1	1	1	1	0	1	1	1	0	1	11
1001000011001111	9.5924677090201	9.570456640169104	9.498151246359924	9.553691865183042	0.02014403154961799	6.746540462578205	6.519177916059267	6.0	6.421906126212491	0.15621940574696883	6.0	6.0	6.0	6.0	0.0	1	0	0	1	0	0	0	0	1	1	0	0	1	1	1	1	8
1001101110111111	9.424722579367767	9.419004915327907	9.35141263499263	9.398380043229436	0.01664645106261464	6.0	6.0	6.0	6.0	0.0	6.0	6.0	6.0	6.0	0.0	1	0	0	1	1	0	1	1	1	0	1	1	1	1	1	1	12
1111011111001000	9.572661716627877	9.560892279738038	9.530892001119467	9.554815332495126	0.008792745582374726	6.0	6.0	6.0	6.0	0.0	6.0	6.0	6.0	6.0	0.0	1	1	1	1	0	1	1	1	1	1	0	0	1	0	0	0	10
1111110001110010	9.586608797219826	9.609498576277664	9.54013689246608	9.578748088654523	0.014428581875661511	6.7364256479069065	6.499145191132506	6.086885850616206	6.440818896551872	0.13418081988231484	6.0	6.0	6.0	6.0	0.0	1	1	1	1	1	1	0	0	0	1	1	1	0	0	1	0	10
1101001011101101	9.599678952979687	9.558907152327373	9.514524804675961	9.557703636661007	0.017387225103518908	6.554071176067867	6.698950691118459	6.107490845726291	6.453504237637539	0.12585803444540794	6.0	6.0	6.0	6.0	0.0	1	1	0	1	0	0	1	0	1	1	1	0	1	1	0	1	10
1101010111011101	9.582552336162012	9.52824493669951	9.532444286572664	9.547747186478063	0.012335298052275994	7.159925375038716	7.084191690650387	7.123324501558617	7.1224805224159065	0.015461953107292882	6.0	6.0	6.0	6.0	0.0	1	1	0	1	0	1	0	1	1	1	0	1	1	1	0	1	11
1001110110111001	9.572453698344832	9.462242059692944	9.382705955354185	9.47246723779732	0.03890044385556728	6.0	6.0	6.0	6.0	0.0	6.0	6.0	6.0	6.0	0.0	1	0	0	1	1	1	0	1	1	0	1	1	1	0	0	1	10
0101010111001111	9.60527250476576	9.453757695137552	9.527169475788911	9.52873322523074	0.030932772179910736	6.896479091771004	6.9732846717196075	6.555092164508984	6.808285309333198	0.09087982056658858	6.0	6.0	6.0	6.0	0.0	0	1	0	1	0	1	0	1	1	1	0	0	1	1	1	1	10
1101111001110011	9.62093671569069	9.598886467330669	9.51519131039938	9.57833816447358	0.022774976208497555	6.0	6.0	6.0	6.0	0.0	6.0	6.0	6.0	6.0	0.0	1	1	0	1	1	1	1	0	0	1	1	1	0	0	1	1	11
1101111010011101	9.566783689543163	9.456928382776098	9.491274212893853	9.504995428404373	0.02294286716511273	6.0	6.0	6.0	6.0	0.0	6.0	6.0	6.0	6.0	0.0	1	1	0	1	1	1	1	0	1	0	0	1	1	1	0	1	11
1100101111010011	9.628792692637159	9.632441080611141	9.58546297457302	9.615565582607106	0.010668902954713658	6.0	6.0	6.0	6.0	0.0	6.0	6.0	6.0	6.0	0.0	1	1	0	0	1	0	1	1	1	1	0	1	0	0	1	1	10
0000001111110011	9.623739737410206	9.544203083477832	9.422675516071696	9.530206112319911	0.041339330902527845	6.0	6.0	6.0	6.0	0.0	6.0	6.0	6.0	6.0	0.0	0	0	0	0	0	0	1	1	1	1	1	1	0	0	1	1	8
1111111111111101	9.62270925917042	9.540801063249203	9.549973642389402	9.57116132160301	0.01832087358093295	8.769781348221596	8.42626537870682	8.64858643307762	8.614877720002012	0.07112549159856986	7.505862405404419	7.321062896081322	7.344320310903903	7.390415204129881	0.04109190724796077	1	1	1	1	1	1	1	1	1	1	1	1	1	1	0	1	15
1101111101111111	9.551748433413762	9.686951221927846	9.436515451298726	9.558405035546777	0.051174133385624536	6.0	6.0	6.0	6.0	0.0	6.0	6.0	6.0	6.0	0.0	1	1	0	1	1	1	1	1	0	1	1	1	1	1	1	1	14
1111000101101101	9.537193228610727	9.425149207448195	9.473703770292213	9.478682068783712	0.02293851659498472	6.0	6.0	6.0	6.0	0.0	6.0	6.0	6.0	6.0	0.0	1	1	1	1	0	0	0	1	0	1	1	0	1	1	0	1	10
1111010001011101	9.575405179686081	9.453403554744206	9.525115700709966	9.517974811713417	0.025031125104092118	6.0	6.0	6.0	6.0	0.0	6.0	6.0	6.0	6.0	0.0	1	1	1	1	0	1	0	0	0	1	0	1	1	1	0	1	10
1111001111101101	9.5300709214685	9.55765007109774	9.579691006371734	9.55580399964599	0.010149664947710944	7.028700424593168	7.129555298027976	6.997034934377196	7.051763552332781	0.02825285410769443	6.0	6.0	6.0	6.0	0.0	1	1	1	1	0	0	1	1	1	1	1	0	1	1	0	1	12
1001110011001101	9.584412568519104	9.580323204660292	9.556454475092789	9.573730082757395	0.006164626094750779	7.457144566704339	7.733171823299529	7.8886271461738575	7.692981178725908	0.08921488107359074	6.0	6.0	6.0	6.0	0.0	1	0	0	1	1	1	0	0	1	1	0	0	1	1	0	1	9
0011010110011110	9.482470689940182	9.394841699479466	9.29966813360968	9.392326841009776	0.03732500733441218	6.0	6.0	6.0	6.0	0.0	6.0	6.0	6.0	6.0	0.0	0	0	1	1	0	1	0	1	1	0	0	1	1	1	1	0	9
1111111110101010	9.511700740524036	9.614567212073505	9.52642983519786	9.550899262598467	0.022709918538840367	6.0	6.0	6.0	6.0	0.0	6.0	6.0	6.0	6.0	0.0	1	1	1	1	1	1	1	1	1	0	1	0	1	0	1	0	12
1101101111101111	9.555672947309354	9.595621638887817	9.475010629556888	9.542101738584686	0.025082820058899363	6.960622051150823	7.019978262145913	7.063699464317603	7.0147665925381135	0.021121116610967036	6.0	6.0	6.0	6.0	0.0	1	1	0	1	1	0	1	1	1	1	1	0	1	1	1	1	13
1101101011110001	9.550709186708566	9.494738221495382	9.543471219327552	9.5296395425105	0.012427615079614705	6.9367169328653935	6.836598304802657	6.885099101928168	6.88613811319874	0.02043993060819274	6.0	6.0	6.0	6.0	0.0	1	1	0	1	1	0	1	0	1	1	1	1	0	0	0	1	10
1100010111011111	9.599217892791591	9.567756326301346	9.456733427802412	9.54123588229845	0.030558567138628052	6.0	6.0	6.0	6.0	0.0	6.0	6.0	6.0	6.0	0.0	1	1	0	0	0	1	0	1	1	1	0	1	1	1	1	1	11
1111011111011111	9.564060404053118	9.601177028062617	9.503493712574981	9.556243714896906	0.020130130829132287	7.2460656477121725	7.369316549288633	6.487519866717516	7.034300687906107	0.19494642255399516	6.0	6.0	6.0	6.0	0.0	1	1	1	1	0	1	1	1	1	1	0	1	1	1	1	1	14
0101111101111101	9.61050021980717	9.568215649608232	9.431212073138107	9.536642647517837	0.038261601137774555	6.0	6.064302688269984	6.0	6.021434229423328	0.015156288974743392	6.0	6.0	6.0	6.0	0.0	0	1	0	1	1	1	1	1	0	1	1	1	1	1	0	1	12
1111110001100111	9.542675019775396	9.592988662673422	9.477669099178938	9.537777593875918	0.02360310366763327	6.822873365829662	6.385881218595796	6.0	6.4029181948084855	0.1680762911928256	6.0	6.0	6.0	6.0	0.0	1	1	1	1	1	1	0	0	0	1	1	0	0	1	1	1	11
1111011111110011	9.562828546935645	9.566490598189608	9.553906192659703	9.561075112594985	0.0026425276607044915	6.8552743946669015	7.129336240614404	6.767079119133576	6.917229918138294	0.07712157143362965	6.0	6.0	6.0	6.0	0.0	1	1	1	1	0	1	1	1	1	1	1	1	0	0	1	1	13
1100010111110001	9.571734701686982	9.602987834332863	9.601947606097513	9.592223380705784	0.0072469533213056	6.0	6.0	6.0	6.0	0.0	6.0	6.0	6.0	6.0	0.0	1	1	0	0	0	1	0	1	1	1	1	1	0	0	0	1	9
1101101011001101	9.491351249134148	9.553760508314687	9.528382749005152	9.524498168817997	0.012813055713403921	7.153221059739134	7.081825367456022	7.02851179251086	7.087852739902005	0.02554521236000082	6.0	6.0	6.0	6.0	0.0	1	1	0	1	1	0	1	0	1	1	0	0	1	1	0	1	10
0001110101111110	9.697103802856203	9.611924123745851	9.533988772190632	9.614338899597563	0.03330666015496009	6.0	6.0	6.0	6.0	0.0	6.0	6.0	6.0	6.0	0.0	0	0	0	1	1	1	0	1	0	1	1	1	1	1	1	0	10
1111111110001101	9.575491615094123	9.523140196853046	9.445947250108556	9.514859687351908	0.02660470119194859	6.0	6.0	6.0	6.0	0.0	6.0	6.0	6.0	6.0	0.0	1	1	1	1	1	1	1	1	1	0	0	0	1	1	0	1	12
1101001111101101	9.6084277098024	9.573503627120916	9.58655973779008	9.589497024904466	0.007204091771116928	6.852740151991457	6.791480520617533	6.40573890964884	6.6833198607526105	0.09893312044067305	6.0	6.0	6.0	6.0	0.0	1	1	0	1	0	0	1	1	1	1	1	0	1	1	0	1	11
1111111110011111	9.543481295881783	9.52340338165192	9.462312093753756	9.50973225709582	0.017259222551515543	6.698409246692356	6.588100998402764	6.3844465725586925	6.556985605884603	0.06502469521389499	6.0	6.0	6.0	6.0	0.0	1	1	1	1	1	1	1	1	1	0	0	1	1	1	1	1	14
1111110101010011	9.572137106948492	9.590538063521985	9.520445569715896	9.561040246728792	0.014835737550707433	6.954141206084037	6.718316656659727	6.210677755723901	6.627711872822555	0.15510286675084656	6.0	6.0	6.0	6.0	0.0	1	1	1	1	1	1	0	1	0	1	0	1	0	0	1	1	11
1110010111010001	9.550940949886867	9.455152616158005	9.457338887785584	9.487810817943485	0.022324333193845435	6.0	6.0	6.0	6.0	0.0	6.0	6.0	6.0	6.0	0.0	1	1	1	0	0	1	0	1	1	1	0	1	0	0	0	1	9
1111010101111011	9.51336979846804	9.514991626366914	9.464674711897224	9.49767871224406	0.011673371482450992	6.0869463189637605	6.0	6.0	6.028982106321254	0.02049344391282785	6.0	6.0	6.0	6.0	0.0	1	1	1	1	0	1	0	1	0	1	1	1	1	0	1	1	12
1111000111100011	9.55305637118324	9.515955428096118	9.5471665489262	9.538726116068519	0.00813992910091172	7.001460650032115	7.216200466097872	7.2578090111640226	7.158490042431336	0.05616417944084703	6.0	6.0	6.0	6.0	0.0	1	1	1	1	0	0	0	1	1	1	1	0	0	0	1	1	10
1111010101010001	9.488275763403092	9.492064828845157	9.424506083263005	9.468282225170418	0.015496516836881693	6.0	6.0	6.0	6.0	0.0	6.0	6.0	6.0	6.0	0.0	1	1	1	1	0	1	0	1	0	1	0	1	0	0	0	1	9
1101001111111101	9.574641975823567	9.53818389672166	9.476523097754127	9.529782990099784	0.020247468905411136	6.403310877028075	6.8042619729791864	6.717855482609444	6.641809444205568	0.08614686616837557	6.0	6.0	6.0	6.0	0.0	1	1	0	1	0	0	1	1	1	1	1	1	1	1	0	1	12
1001111011011101	9.660431083069533	9.596825536887783	9.557738430076594	9.604998350011304	0.02116026701330442	7.090642806433518	7.073687461109692	7.014440867361613	7.059590378301608	0.016333654864282864	6.0	6.0	6.0	6.0	0.0	1	0	0	1	1	1	1	0	1	1	0	1	1	1	0	1	11
1111000001001100	9.591894729977401	9.521164114378088	9.53182299578241	9.548293946712633	0.015567991543408427	6.0	6.0	6.0	6.0	0.0	6.0	6.0	6.0	6.0	0.0	1	1	1	1	0	0	0	0	0	1	0	0	1	1	0	0	7
1101101001111100	9.627711740585488	9.51748311901114	9.518560693830656	9.554585184475762	0.02585507750979362	6.0	6.0	6.0	6.0	0.0	6.0	6.0	6.0	6.0	0.0	1	1	0	1	1	0	1	0	0	1	1	1	1	1	0	0	10
1011111111010001	9.609842049891812	9.493377448847653	9.51963112238604	9.540950207041833	0.024939521353381084	7.745953430305531	7.938850014512267	7.7795443378979625	7.821449260905254	0.042069961530055086	8.090735611440946	8.035807572851795	7.78897680170672	7.971839995333155	0.06561692241494928	1	0	1	1	1	1	1	1	1	1	0	1	0	0	0	1	11
0001011111011101	9.644668016925683	9.482472681934414	9.409318640944832	9.51215311326831	0.0491732111973728	6.0	6.0	6.0	6.0	0.0	6.0	6.0	6.0	6.0	0.0	0	0	0	1	0	1	1	1	1	1	0	1	1	1	0	1	10
1010101011011000	9.519612522672547	9.492978410597958	9.492047833727042	9.501546255665849	0.006390213820055259	6.0	6.0	6.0	6.0	0.0	6.0	6.0	6.0	6.0	0.0	1	0	1	0	1	0	1	0	1	1	0	1	1	0	0	0	8
1111111110010011	9.50226106441677	9.492388316450704	9.477463547332588	9.490704309400021	0.005096667590938352	6.066649695619196	6.017230853107965	6.112193631442546	6.06535806005657	0.01938957434239533	6.0	6.0	6.0	6.0	0.0	1	1	1	1	1	1	1	1	1	0	0	1	0	0	1	1	12
1111110011011011	9.56476556793958	9.613421767113612	9.574533831575096	9.584240388876095	0.010508087127652317	9.019993374850156	8.645901225397472	8.700259270634731	8.788717956960786	0.08251761272644652	7.425920463665454	7.449084245671982	7.403210861570589	7.426071856969341	0.009364018298588886	1	1	1	1	1	1	0	0	1	1	0	1	1	0	1	1	12
1011011111011111	9.620241245834224	9.549983221605318	9.470151935507033	9.546792134315526	0.030657618811619155	6.0	6.0	6.0	6.0	0.0	6.0	6.0	6.0	6.0	0.0	1	0	1	1	0	1	1	1	1	1	0	1	1	1	1	1	13
0001000001101101	9.507902715868306	9.371568778143669	9.284670101014395	9.388047198342123	0.0459380993526548	6.0	6.0	6.0	6.0	0.0	6.0	6.0	6.0	6.0	0.0	0	0	0	1	0	0	0	0	0	1	1	0	1	1	0	1	6
1111101011010010	9.600226696901112	9.510536600303537	9.455259487706703	9.522007594970452	0.02986793354192794	7.459417866351941	7.408255357159918	7.497332009196138	7.455001744235999	0.01824960769168586	6.0	6.0	6.0	6.0	0.0	1	1	1	1	1	0	1	0	1	1	0	1	0	0	1	0	10
1101011111100111	9.60910990172526	9.628546030020543	9.553521450685098	9.597059127476967	0.01589595203242319	6.0	6.0	6.0	6.0	0.0	6.0	6.0	6.0	6.0	0.0	1	1	0	1	0	1	1	1	1	1	1	0	0	1	1	1	12
0100010111011101	9.60020254795196	9.497770604043797	9.399769559160015	9.499247570385258	0.040916544781621	6.0	6.0	6.0	6.0	0.0	6.0	6.0	6.0	6.0	0.0	0	1	0	0	0	1	0	1	1	1	0	1	1	1	0	1	9
1111110001010101	9.634832706459619	9.559624751686362	9.534302233371193	9.576253230505726	0.02134624766295857	6.412882916106124	6.45460324271887	6.404815016251487	6.424100391692161	0.010909404907268085	6.0	6.0	6.0	6.0	0.0	1	1	1	1	1	1	0	0	0	1	0	1	0	1	0	1	10
0101011111011011	9.55844983751374	9.48288143639947	9.429345333972153	9.490225535961786	0.02648095245475457	6.0	6.0	6.0	6.0	0.0	6.0	6.0	6.0	6.0	0.0	0	1	0	1	0	1	1	1	1	1	0	1	1	0	1	1	11
0101101011111101	9.549142089206132	9.486610664244226	9.448645547093564	9.494799433514642	0.020717065030101973	6.8208624640530005	6.977782413332281	6.9843908767505125	6.9276785847119315	0.03778928567653132	6.0	6.0	6.0	6.0	0.0	0	1	0	1	1	0	1	0	1	1	1	1	1	1	0	1	11
1111101011011111	9.543872917720623	9.566230197470935	9.506993269002349	9.539032128064635	0.012212209443614397	7.978894307222446	7.759691107801138	7.771332383657433	7.836639266227006	0.050350856236267075	6.0	6.0	6.0	6.0	0.0	1	1	1	1	1	0	1	0	1	1	0	1	1	1	1	1	13
1101010101110111	9.497820822322515	9.470283048646534	9.4374513369782	9.468518402649083	0.012338653166685998	6.0	6.0	6.0	6.0	0.0	6.0	6.0	6.0	6.0	0.0	1	1	0	1	0	1	0	1	0	1	1	1	0	1	1	1	11
1101011011001011	9.538031818310431	9.58041069449119	9.500716108777583	9.5397195405264	0.0162785290732127	6.0	6.0	6.0	6.0	0.0	6.0	6.0	6.0	6.0	0.0	1	1	0	1	0	1	1	0	1	1	0	0	1	0	1	1	10
1101010011010011	9.493279804815817	9.513254060644607	9.568078976648382	9.524870947369601	0.0158110882484171	7.071896620014128	6.701733605091728	6.597409065223537	6.790346430109797	0.10179537029506043	6.0	6.0	6.0	6.0	0.0	1	1	0	1	0	1	0	0	1	1	0	1	0	0	1	1	9
1101000010010101	9.339681334074447	9.328129163383693	9.427348197103568	9.365052898187237	0.02215058826240446	6.0	6.0	6.0	6.0	0.0	6.0	6.0	6.0	6.0	0.0	1	1	0	1	0	0	0	0	1	0	0	1	0	1	0	1	7
1111111001000001	9.676618200117801	9.589972799691756	9.537621942259491	9.601404314023016	0.0286589124141827	6.0	6.0	6.0	6.0	0.0	6.0	6.0	6.0	6.0	0.0	1	1	1	1	1	1	1	0	0	1	0	0	0	0	0	1	9
1111101011111101	9.543044818795105	9.529942566279354	9.458351168397256	9.51044618449057	0.01861153442343731	7.962725284278666	7.806531499457037	7.713603002462118	7.827619928732607	0.05139555624655047	6.0	6.0	6.0	6.0	0.0	1	1	1	1	1	0	1	0	1	1	1	1	1	1	0	1	13
1111010010000101	9.418600244515172	9.400154909984186	9.426325749568957	9.41502696802277	0.005489451092949397	6.0	6.0	6.0	6.0	0.0	6.0	6.0	6.0	6.0	0.0	1	1	1	1	0	1	0	0	1	0	0	0	0	1	0	1	8
1111010001110111	9.529414539398454	9.576068131565128	9.55734420882338	9.554275626595654	0.009584723636946313	6.1044110509192775	6.0	6.0	6.034803683639759	0.024609920711945007	6.0	6.0	6.0	6.0	0.0	1	1	1	1	0	1	0	0	0	1	1	1	0	1	1	1	11
1101000101011011	9.49268589115317	9.469302567371297	9.489164899286683	9.483717785937051	0.005146977116955637	6.0	6.0	6.0	6.0	0.0	6.0	6.0	6.0	6.0	0.0	1	1	0	1	0	0	0	1	0	1	0	1	1	0	1	1	9
1111110001001011	9.56629325627858	9.585655684015027	9.55149189650774	9.567813612267116	0.006994339448912436	6.0	6.0	6.0	6.0	0.0	6.0	6.0	6.0	6.0	0.0	1	1	1	1	1	1	0	0	0	1	0	0	1	0	1	1	10
1011000111101001	9.546014330587859	9.507709168489663	9.524318515170002	9.526014004749173	0.007841953142415823	6.955188310223773	6.911205483359753	6.6231436223735525	6.829845805319027	0.0736296663383218	6.0	6.0	6.0	6.0	0.0	1	0	1	1	0	0	0	1	1	1	1	0	1	0	0	1	9
1111010001111100	9.480611911899656	9.569112170881516	9.51439173577534	9.521371939518836	0.018232829334242202	6.0	6.0	6.0	6.0	0.0	6.0	6.0	6.0	6.0	0.0	1	1	1	1	0	1	0	0	0	1	1	1	1	1	0	0	10
1101101111111011	9.559052463516103	9.499025482305523	9.441749640199859	9.499942528673829	0.023946533569675976	6.7456472281657645	6.994696321661128	6.949109374844854	6.896484308223916	0.054134725408557086	6.0	6.0	6.0	6.0	0.0	1	1	0	1	1	0	1	1	1	1	1	1	1	0	1	1	13
1111100110010011	9.45741309486973	9.399085406438001	9.354008438169426	9.403502313159054	0.021165075618275006	6.0	6.0	6.0	6.0	0.0	6.0	6.0	6.0	6.0	0.0	1	1	1	1	1	0	0	1	1	0	0	1	0	0	1	1	10
1111000001100101	9.527341746980131	9.407001411436676	9.409738439454456	9.448027199290422	0.02804749227355269	6.0	6.0	6.0	6.0	0.0	6.0	6.0	6.0	6.0	0.0	1	1	1	1	0	0	0	0	0	1	1	0	0	1	0	1	8
1101000110101101	9.389798255873243	9.412981217319087	9.356025189273954	9.386268220822094	0.0116928977251597	6.0	6.0	6.0	6.0	0.0	6.0	6.0	6.0	6.0	0.0	1	1	0	1	0	0	0	1	1	0	1	0	1	1	0	1	9
1011101001110011	9.485892250598686	9.431386063195623	9.37461642410762	9.430631579300643	0.022715649248841403	6.0	6.0	6.0	6.0	0.0	6.0	6.0	6.0	6.0	0.0	1	0	1	1	1	0	1	0	0	1	1	1	0	0	1	1	10
0111011111011011	9.5283772972772	9.465575637363344	9.39531629982174	9.463089744820762	0.027175178647865325	6.6807137669005145	6.435447249779172	6.162087013805218	6.426082676828301	0.10591600341501481	6.0	6.0	6.0	6.0	0.0	0	1	1	1	0	1	1	1	1	1	0	1	1	0	1	1	12
1001101011110011	9.591568077595284	9.50108134243145	9.5028218048482	9.531823741624978	0.02112580003516882	6.392704551552929	6.5255105468075145	6.0	6.30607169945348	0.11155661641714101	6.0	6.0	6.0	6.0	0.0	1	0	0	1	1	0	1	0	1	1	1	1	0	0	1	1	10
1111100011010101	9.561736794000492	9.496093182797589	9.532789395133966	9.530206457310683	0.013430528649242164	8.280412893739241	8.089032767181141	8.210863327784239	8.193436329568208	0.03954820562820505	6.0	6.0	6.0	6.0	0.0	1	1	1	1	1	0	0	0	1	1	0	1	0	1	0	1	10
1111010001010010	9.541409425548279	9.501081759150344	9.48465585121962	9.509049011972747	0.011922317223885584	6.0	6.0	6.0	6.0	0.0	6.0	6.0	6.0	6.0	0.0	1	1	1	1	0	1	0	0	0	1	0	1	0	0	1	0	8
1111000110011011	9.35239518866068	9.415072461268721	9.386426986361283	9.384631545430228	0.012809682740661304	6.0	6.0	6.0	6.0	0.0	6.0	6.0	6.0	6.0	0.0	1	1	1	1	0	0	0	1	1	0	0	1	1	0	1	1	10
1101000011010011	9.5682078574391	9.554852022217133	9.473796993366154	9.532285624340796	0.020857790505328253	6.856423214788232	6.895223525911902	6.646123083521196	6.799256608073777	0.05471711080982076	6.0	6.0	6.0	6.0	0.0	1	1	0	1	0	0	0	0	1	1	0	1	0	0	1	1	8
1101110001111110	9.590634452230484	9.67829194477762	9.547542434652886	9.605489610553663	0.027200996905963698	6.0	6.0	6.0	6.0	0.0	6.0	6.0	6.0	6.0	0.0	1	1	0	1	1	1	0	0	0	1	1	1	1	1	1	0	11
1101010111001111	9.533152221645539	9.595844061828956	9.520185863458867	9.54972738231112	0.016518135026233647	6.965262640375483	7.059404048687787	7.0549720377699545	7.026546242277742	0.021685903934659946	6.0	6.0	6.0	6.0	0.0	1	1	0	1	0	1	0	1	1	1	0	0	1	1	1	1	11
1111111011101111	9.662294964533118	9.558283978645598	9.507101913965961	9.575893619048225	0.03228465918569113	7.665747550244012	7.813060765109824	7.931542492214852	7.803450269189562	0.05436145849496013	6.0	6.0	6.0	6.0	0.0	1	1	1	1	1	1	1	0	1	1	1	0	1	1	1	1	14
1111011011100011	9.547838076927222	9.551587102473661	9.565047120302753	9.55482409990121	0.0036945096141593942	6.19302173914902	6.617400210372541	6.164078193533169	6.3248333810182435	0.10360658315395484	6.0	6.0	6.0	6.0	0.0	1	1	1	1	0	1	1	0	1	1	1	0	0	0	1	1	11
1111010111011101	9.52455242419185	9.542768004163117	9.536695000888681	9.534671809747882	0.003786419047432578	8.052271285898401	7.887393028206858	7.954568215505054	7.9647441765367715	0.03384738444360466	6.0	6.0	6.0	6.0	0.0	1	1	1	1	0	1	0	1	1	1	0	1	1	1	0	1	12
1101000111010011	9.510555164388826	9.491432910197467	9.467863106473322	9.48995039368654	0.008730228554368549	6.815460489333957	6.840684414242232	6.031002099302174	6.562382334292788	0.18794182486475025	6.0	6.0	6.0	6.0	0.0	1	1	0	1	0	0	0	1	1	1	0	1	0	0	1	1	9
0100011111100111	9.641158514036086	9.536023920264707	9.48922475128545	9.555469061862082	0.03176620902441787	6.0	6.0	6.0	6.0	0.0	6.0	6.0	6.0	6.0	0.0	0	1	0	0	0	1	1	1	1	1	1	0	0	1	1	1	10
1111000011000111	9.543653276338352	9.52286386796219	9.468664401496273	9.51172718193227	0.015805337544202085	7.2595245614980275	7.115853023454568	7.275266621253968	7.2168814020688545	0.035863173022414034	6.0	6.0	6.0	6.0	0.0	1	1	1	1	0	0	0	0	1	1	0	0	0	1	1	1	9
0101011101011101	9.557284705178663	9.517129438750038	9.470871230370648	9.515095124766448	0.01765373417597887	6.0	6.0	6.0	6.0	0.0	6.0	6.0	6.0	6.0	0.0	0	1	0	1	0	1	1	1	0	1	0	1	1	1	0	1	10
1101001011011101	9.550176503866405	9.506884832482745	9.47887051562762	9.511977283992257	0.014666207112838241	6.6606769061958495	6.505851177340348	6.0	6.388842694512065	0.14106247574831401	6.0	6.0	6.0	6.0	0.0	1	1	0	1	0	0	1	0	1	1	0	1	1	1	0	1	10
1011000010011101	9.42625146579358	9.390491968664897	9.401617752756364	9.406120395738279	0.0074709521268603455	6.0	6.0	6.0	6.0	0.0	6.0	6.0	6.0	6.0	0.0	1	0	1	1	0	0	0	0	1	0	0	1	1	1	0	1	8
1001000101111111	9.536726180892172	9.469444960165976	9.461436621817224	9.489202587625124	0.016881460780670387	6.0	6.0	6.0	6.0	0.0	6.0	6.0	6.0	6.0	0.0	1	0	0	1	0	0	0	1	0	1	1	1	1	1	1	1	10
0101110101111001	9.616930635114574	9.551917930256515	9.518927653084276	9.562592072818456	0.020357632112151455	6.423014481037486	6.212580215693312	6.0	6.2118648989102665	0.08634783972440423	6.0	6.0	6.0	6.0	0.0	0	1	0	1	1	1	0	1	0	1	1	1	1	0	0	1	10
0001011111011011	9.57883172693023	9.428064074454634	9.451927112965015	9.486274304783294	0.03308453427107047	6.0	6.0	6.0	6.0	0.0	6.0	6.0	6.0	6.0	0.0	0	0	0	1	0	1	1	1	1	1	0	1	1	0	1	1	10
1111110101011100	9.566087848353929	9.654140151166414	9.532795353004396	9.584341117508247	0.025596309585433855	6.578854464269779	6.230603599623598	6.0	6.269819354631125	0.1189688539645783	6.0	6.0	6.0	6.0	0.0	1	1	1	1	1	1	0	1	0	1	0	1	1	1	0	0	11
1111101111101101	9.558976182749436	9.501725484714463	9.5506457634024	9.537115810288766	0.012627386439902355	7.694855167343378	7.5120018617000355	7.678784756722506	7.628547261921973	0.041335390928052565	6.0	6.0	6.0	6.0	0.0	1	1	1	1	1	0	1	1	1	1	1	0	1	1	0	1	13
1101111001001111	9.55198694206681	9.625339829324917	9.514017408779708	9.563781393390478	0.023103037825254594	6.0	6.0	6.0	6.0	0.0	6.0	6.0	6.0	6.0	0.0	1	1	0	1	1	1	1	0	0	1	0	0	1	1	1	1	11
1111011011000001	9.583376692443867	9.489377252853245	9.550094464341363	9.540949469879491	0.0194580611128074	6.0	6.0	6.0	6.0	0.0	6.0	6.0	6.0	6.0	0.0	1	1	1	1	0	1	1	0	1	1	0	0	0	0	0	1	9
1101110101011110	9.643275347450047	9.635455533935026	9.576909026782866	9.61854663605598	0.01480740383691984	6.0	6.0	6.0	6.0	0.0	6.0	6.0	6.0	6.0	0.0	1	1	0	1	1	1	0	1	0	1	0	1	1	1	1	0	11
1101110011110001	9.59926652723736	9.52089110021336	9.395741878298887	9.50529983524987	0.041908404763152746	7.814421145457722	7.8676613180318995	7.759483214214718	7.813855225901446	0.02208266943056756	6.0	6.0	6.0	6.0	0.0	1	1	0	1	1	1	0	0	1	1	1	1	0	0	0	1	10
1111111001100011	9.547701030132457	9.595626072160737	9.53954075561518	9.560955952636123	0.012370397534285382	6.0	6.0	6.0	6.0	0.0	6.0	6.0	6.0	6.0	0.0	1	1	1	1	1	1	1	0	0	1	1	0	0	0	1	1	11
1111101111010011	9.488630024942466	9.521201562782704	9.434716459441377	9.481516015722184	0.01783197091546383	7.670612559232419	7.553770217974836	7.665991094639994	7.630124623949082	0.027011836811247712	6.0	6.0	6.0	6.0	0.0	1	1	1	1	1	0	1	1	1	1	0	1	0	0	1	1	12
1111101011101101	9.578746224480556	9.565843829012485	9.542707213081902	9.562432422191648	0.007454650204413857	7.5318841749396865	7.4296551994517275	7.607422591628344	7.5229873220065855	0.03642269650552999	6.0	6.0	6.0	6.0	0.0	1	1	1	1	1	0	1	0	1	1	1	0	1	1	0	1	12
1111010011010011	9.538334744234298	9.49585696486598	9.611517798293935	9.548569835798071	0.02388487988177655	7.972579873902457	7.72584584430111	7.792807446568098	7.830411054923888	0.052089576471467655	6.0	6.0	6.0	6.0	0.0	1	1	1	1	0	1	0	0	1	1	0	1	0	0	1	1	10
1101011011101101	9.732746237114043	9.564911108864301	9.481960801675664	9.593206049218002	0.05215966895699364	6.27699594805625	6.092828057757763	6.149961508183662	6.173261837999225	0.038485131287689954	6.0	6.0	6.0	6.0	0.0	1	1	0	1	0	1	1	0	1	1	1	0	1	1	0	1	11
1101000111011101	9.576928090997141	9.531898019731232	9.529132032274157	9.54598604766751	0.010954224494936082	6.7436765226392685	7.1356648671567955	6.790171516367054	6.889837635387706	0.08742970225641944	6.0	6.0	6.0	6.0	0.0	1	1	0	1	0	0	0	1	1	1	0	1	1	1	0	1	10
0111101011111100	9.494695905439212	9.44015662516781	9.377262595557653	9.437371708721559	0.023991187226229574	7.328345116662265	7.345991293485774	7.196529400253963	7.290288603467334	0.03334401003060439	6.0	6.0	6.0	6.0	0.0	0	1	1	1	1	0	1	0	1	1	1	1	1	1	0	0	11
0110010101111001	9.465723470395012	9.417975284811204	9.397642925561637	9.427113893589285	0.014267537594141249	6.0	6.0	6.0	6.0	0.0	6.0	6.0	6.0	6.0	0.0	0	1	1	0	0	1	0	1	0	1	1	1	1	0	0	1	9
1111010111011111	9.570026075456408	9.542777250065054	9.47093553606068	9.527912953860714	0.02089834214186968	8.199726251680604	7.98592040513955	8.115972068557921	8.100539575126026	0.04398267915503466	6.0	6.0	6.0	6.0	0.0	1	1	1	1	0	1	0	1	1	1	0	1	1	1	1	1	13
1101110010010001	9.479329659270876	9.51866737413964	9.472853776302548	9.490283603237687	0.010121866618166846	6.0	6.0	6.0	6.0	0.0	6.0	6.0	6.0	6.0	0.0	1	1	0	1	1	1	0	0	1	0	0	1	0	0	0	1	8
1001010111001001	9.674472032343235	9.577410687170683	9.499592885756092	9.58382520175667	0.03576902401937616	6.600467549412325	6.676328430474461	6.396071191853597	6.557622390580128	0.05917884007588796	6.0	6.0	6.0	6.0	0.0	1	0	0	1	0	1	0	1	1	1	0	0	1	0	0	1	8
1111111101110011	9.545249464262222	9.603543044292438	9.495038434613463	9.547943647722708	0.022168884157702445	6.0	6.283221301124505	6.0	6.094407100374835	0.0667559008672049	6.0	6.0	6.0	6.0	0.0	1	1	1	1	1	1	1	1	0	1	1	1	0	0	1	1	13
1101011011100011	9.577745600322617	9.572599190444603	9.538315432799834	9.562886741189018	0.008750555035971603	6.0	6.0	6.0	6.0	0.0	6.0	6.0	6.0	6.0	0.0	1	1	0	1	0	1	1	0	1	1	1	0	0	0	1	1	10
1111111011001001	9.61151787063458	9.562698306944167	9.637079817328717	9.603765331635822	0.015428483763627873	7.7259175780645215	7.63190614858242	7.466145895558149	7.607989874068363	0.05369562815540595	6.0	6.0	6.0	6.0	0.0	1	1	1	1	1	1	1	0	1	1	0	0	1	0	0	1	11
1101101111101100	9.511051586670874	9.59012503742982	9.538996372332118	9.54672433214427	0.016370418829276295	7.0382240471499316	7.055226794210008	7.3406479861438525	7.1446996091679305	0.06936509470610402	6.0	6.0	6.0	6.0	0.0	1	1	0	1	1	0	1	1	1	1	1	0	1	1	0	0	11
1101011101010011	9.466360057123113	9.623307806537076	9.494481458096502	9.528049773918896	0.03416448663424994	6.0	6.0	6.0	6.0	0.0	6.0	6.0	6.0	6.0	0.0	1	1	0	1	0	1	1	1	0	1	0	1	0	0	1	1	10
1001001001111101	9.52427776182372	9.391313134037132	9.375071474412307	9.430220790091054	0.033419014860510146	6.0	6.0	6.0	6.0	0.0	6.0	6.0	6.0	6.0	0.0	1	0	0	1	0	0	1	0	0	1	1	1	1	1	0	1	9
1111101111101011	9.541333355398304	9.535360715827649	9.497386410931323	9.524693494052425	0.009731184385754613	7.418591291273334	7.254283930788157	7.305816929907343	7.326230717322944	0.0343068730113187	6.0	6.0	6.0	6.0	0.0	1	1	1	1	1	0	1	1	1	1	1	0	1	0	1	1	13
1111000001001101	9.527356186738068	9.413619998264924	9.455444145020726	9.465473443341239	0.02348552838345713	6.0	6.0	6.0	6.0	0.0	6.0	6.0	6.0	6.0	0.0	1	1	1	1	0	0	0	0	0	1	0	0	1	1	0	1	8
1001010111001101	9.592348054523894	9.516421603811244	9.468060626479074	9.525610094938072	0.025577211437103863	6.8269338622174764	6.479249420264579	6.624499234888464	6.643560839123507	0.07129004881589303	6.0	6.0	6.0	6.0	0.0	1	0	0	1	0	1	0	1	1	1	0	0	1	1	0	1	9
1111010111101011	9.551234927919488	9.534212834759726	9.567365085798839	9.550937616159352	0.006767991244972175	7.309815786654973	7.175761511823689	7.376509349934436	7.287362216137699	0.04173936141554573	6.0	6.0	6.0	6.0	0.0	1	1	1	1	0	1	0	1	1	1	1	0	1	0	1	1	12
1101110101111001	9.648564612133171	9.625848259579891	9.56650239910184	9.613638423604966	0.017298178000398533	6.0	6.0	6.0	6.0	0.0	6.0	6.0	6.0	6.0	0.0	1	1	0	1	1	1	0	1	0	1	1	1	1	0	0	1	11
1101110101001111	9.563409293126554	9.575948006778454	9.524366411538416	9.554574570481142	0.010982595966974203	6.0	6.0	6.0	6.0	0.0	6.0	6.0	6.0	6.0	0.0	1	1	0	1	1	1	0	1	0	1	0	0	1	1	1	1	11
1001110111011011	9.535421327556335	9.567640906944886	9.434810111365731	9.512624115288984	0.02828659791290979	7.240508877477182	7.426091238032902	7.4426523740746475	7.3697508298615775	0.04581880890865317	6.0	6.0	6.0	6.0	0.0	1	0	0	1	1	1	0	1	1	1	0	1	1	0	1	1	11
0101010101011011	9.55620815627706	9.539502794188495	9.480571283658726	9.52542741137476	0.016221495131899386	6.0	6.0	6.0	6.0	0.0	6.0	6.0	6.0	6.0	0.0	0	1	0	1	0	1	0	1	0	1	0	1	1	0	1	1	9
1111011101111111	9.541509529445415	9.5256000299614	9.460521918598614	9.509210492668478	0.017517662406722125	6.0	6.0	6.0	6.0	0.0	6.0	6.0	6.0	6.0	0.0	1	1	1	1	0	1	1	1	0	1	1	1	1	1	1	1	14
1101111010001011	9.549389260728356	9.480978222605748	9.48486877368758	9.50507875234056	0.015686246428632443	6.0	6.0	6.0	6.0	0.0	6.0	6.0	6.0	6.0	0.0	1	1	0	1	1	1	1	0	1	0	0	0	1	0	1	1	10
1101011111101101	9.65211940297713	9.559510770140776	9.560298100223706	9.590642757780536	0.02173587050873767	6.16726269067309	6.236221499079387	6.0	6.134494729917492	0.049590747786068125	6.0	6.0	6.0	6.0	0.0	1	1	0	1	0	1	1	1	1	1	1	0	1	1	0	1	12
1101111101110011	9.563196867683567	9.669388737773557	9.524399021965962	9.585661542474362	0.030643108612388816	6.0	6.0	6.0	6.0	0.0	6.0	6.0	6.0	6.0	0.0	1	1	0	1	1	1	1	1	0	1	1	1	0	0	1	1	12
1101110110010101	9.517919574089833	9.514865103630363	9.424493037519136	9.48575923841311	0.02166984454809867	6.0	6.0	6.0	6.0	0.0	6.0	6.0	6.0	6.0	0.0	1	1	0	1	1	1	0	1	1	0	0	1	0	1	0	1	10
1001111010011011	9.592584135494725	9.46456973061585	9.478861809601657	9.512005225237411	0.028637930744982287	6.0	6.0	6.0	6.0	0.0	6.0	6.0	6.0	6.0	0.0	1	0	0	1	1	1	1	0	1	0	0	1	1	0	1	1	10
1001110011001001	9.601983368397493	9.565543245282095	9.476692830286947	9.548073147988845	0.026310115163767554	7.331731662708485	7.519939185104349	7.380772085460002	7.410814311090945	0.03985895834531797	6.0	6.0	6.0	6.0	0.0	1	0	0	1	1	1	0	0	1	1	0	0	1	0	0	1	8
1001010011000101	9.637111201199165	9.488463309134051	9.60048312093269	9.575352543755303	0.03161673709129898	6.744967246811268	6.554970473412008	6.16691800633263	6.488951908851969	0.1202802763371234	6.0	6.0	6.0	6.0	0.0	1	0	0	1	0	1	0	0	1	1	0	0	0	1	0	1	7
1111101101110010	9.495971701507036	9.570753907937863	9.464995609517436	9.510573739654113	0.02219654274781152	6.0	6.0	6.0	6.0	0.0	6.0	6.0	6.0	6.0	0.0	1	1	1	1	1	0	1	1	0	1	1	1	0	0	1	0	11
1111101101011111	9.440149909384932	9.499671939102976	9.396617690483668	9.445479846323858	0.021120095921705554	6.0	6.0	6.0	6.0	0.0	6.0	6.0	6.0	6.0	0.0	1	1	1	1	1	0	1	1	0	1	0	1	1	1	1	1	13
1110010011010111	9.444023959670199	9.465542893754458	9.449678896694216	9.45308191670629	0.004554330172714929	6.0	6.0	6.0	6.0	0.0	6.0	6.0	6.0	6.0	0.0	1	1	1	0	0	1	0	0	1	1	0	1	0	1	1	1	10
1101101011001010	9.531101188009599	9.563640288898268	9.53569860123779	9.543480026048552	0.007189241971224732	6.924026422142432	6.942991351576624	6.527854915230668	6.798290896316575	0.09569189449872757	6.0	6.0	6.0	6.0	0.0	1	1	0	1	1	0	1	0	1	1	0	0	1	0	1	0	9
1001100111011111	9.596552976555357	9.514778064715466	9.397831005301057	9.50305401552396	0.040775187434439975	7.1233323572930685	6.9304938509231135	6.247347812614526	6.767058006943569	0.18791429205531335	6.0	6.0	6.0	6.0	0.0	1	0	0	1	1	0	0	1	1	1	0	1	1	1	1	1	11
1111010011111111	9.613412336969382	9.578955834523347	9.544341682922203	9.578903284804978	0.014099000459435344	8.116668208926969	7.791849766174577	8.077645134924666	7.995387703342071	0.07240104623547251	6.0	6.0	6.0	6.0	0.0	1	1	1	1	0	1	0	0	1	1	1	1	1	1	1	1	13
1101111001000001	9.609178383865991	9.549487530954856	9.60963053867097	9.589432151163939	0.014122857499622343	6.0	6.0	6.0	6.0	0.0	6.0	6.0	6.0	6.0	0.0	1	1	0	1	1	1	1	0	0	1	0	0	0	0	0	1	8
1101110101010101	9.668801703809736	9.61547615160376	9.5038167893499	9.596031548254466	0.03437192398210209	6.0	6.0	6.0	6.0	0.0	6.0	6.0	6.0	6.0	0.0	1	1	0	1	1	1	0	1	0	1	0	1	0	1	0	1	10
1101010010001101	9.36992924548926	9.462334454914098	9.43359065673124	9.4219514523782	0.01930580219645086	6.0	6.0	6.0	6.0	0.0	6.0	6.0	6.0	6.0	0.0	1	1	0	1	0	1	0	0	1	0	0	0	1	1	0	1	8
1101000111111011	9.49230358284235	9.53884096925944	9.480289459609699	9.503811337237162	0.012625312728631157	6.657326230835865	6.884855922911742	6.8369871768204025	6.79305644352267	0.04897256407093866	6.0	6.0	6.0	6.0	0.0	1	1	0	1	0	0	0	1	1	1	1	1	1	0	1	1	11
1001111001110011	9.629163046745493	9.625392478669852	9.553383595745784	9.602646373720376	0.01743401974222509	6.0	6.0	6.0	6.0	0.0	6.0	6.0	6.0	6.0	0.0	1	0	0	1	1	1	1	0	0	1	1	1	0	0	1	1	10
1111101111110011	9.555653520113912	9.48379096963594	9.52979082658586	9.52307843877857	0.014859613346564273	7.632654855838947	7.510610456648947	7.619644151263134	7.58763648791701	0.027362007504540396	6.0	6.0	6.0	6.0	0.0	1	1	1	1	1	0	1	1	1	1	1	1	0	0	1	1	13
1111011110101011	9.424757497502704	9.457822929265443	9.328587415603792	9.40372261412398	0.027408344948558726	6.0	6.0	6.0	6.0	0.0	6.0	6.0	6.0	6.0	0.0	1	1	1	1	0	1	1	1	1	0	1	0	1	0	1	1	12
1001010111010011	9.584401356010572	9.53084477210934	9.485511655772873	9.533585927964262	0.020209027087093222	6.008748398730408	6.5946961899940195	6.0	6.201148196241476	0.13915168651515736	6.0	6.0	6.0	6.0	0.0	1	0	0	1	0	1	0	1	1	1	0	1	0	0	1	1	9
1101101101011011	9.45612891126412	9.516168874426759	9.41585915663898	9.46271898077662	0.02060777212930694	6.0	6.0	6.0	6.0	0.0	6.0	6.0	6.0	6.0	0.0	1	1	0	1	1	0	1	1	0	1	0	1	1	0	1	1	11
1101000001101101	9.48389905712947	9.4332322602526	9.473465774512759	9.463532363964944	0.010922343767663396	6.0	6.0	6.0	6.0	0.0	6.0	6.0	6.0	6.0	0.0	1	1	0	1	0	0	0	0	0	1	1	0	1	1	0	1	8
1011110101011101	9.596175331161954	9.563592662423355	9.519834312244287	9.559867435276532	0.015638604905374717	6.0	6.0	6.0	6.0	0.0	6.0	6.0	6.0	6.0	0.0	1	0	1	1	1	1	0	1	0	1	0	1	1	1	0	1	11
1001101111111101	9.580963754865428	9.516118183852342	9.423567632082024	9.5068831902666	0.03229382989754284	6.883419819206705	6.47513930527459	6.0	6.452853041493765	0.18049937784139464	6.0	6.0	6.0	6.0	0.0	1	0	0	1	1	0	1	1	1	1	1	1	1	1	0	1	12
0110010111011111	9.543221645256867	9.495720212715657	9.413988758068873	9.484310205347134	0.026686219864218767	6.0	6.0	6.0	6.0	0.0	6.0	6.0	6.0	6.0	0.0	0	1	1	0	0	1	0	1	1	1	0	1	1	1	1	1	11
0101111111010110	9.566409665274898	9.439760821767667	9.501871145353556	9.50268054413204	0.025853670710419312	6.905372312750663	7.157355370837669	7.285317672690902	7.116015118759744	0.07892124921551981	6.0	6.0	6.0	6.0	0.0	0	1	0	1	1	1	1	1	1	1	0	1	0	1	1	0	11
1111001011011011	9.55012000314057	9.519678452599754	9.494889398161241	9.52156261796719	0.011293563734450278	7.161788850444207	7.035089591542605	7.226238595063559	7.141039012350124	0.039701809829572804	6.0	6.0	6.0	6.0	0.0	1	1	1	1	0	0	1	0	1	1	0	1	1	0	1	1	11
1101110101110110	9.63251325340667	9.757296719175018	9.544193367337503	9.644667779973064	0.04371128578169849	6.0	6.0	6.0	6.0	0.0	6.0	6.0	6.0	6.0	0.0	1	1	0	1	1	1	0	1	0	1	1	1	0	1	1	0	11
1001000011011101	9.582161878139743	9.478406224004779	9.531035055534888	9.530534385893136	0.021179773935727852	6.0	6.0	6.0	6.0	0.0	6.0	6.0	6.0	6.0	0.0	1	0	0	1	0	0	0	0	1	1	0	1	1	1	0	1	8
0001101111111101	9.556626429297019	9.445193612943257	9.296899147772306	9.43290639667086	0.0531942931695494	6.0	6.0	6.0	6.0	0.0	6.0	6.0	6.0	6.0	0.0	0	0	0	1	1	0	1	1	1	1	1	1	1	1	0	1	11
1101011111100001	9.626023649803065	9.579698999552198	9.63109224546241	9.612271631605891	0.011562546826344349	6.0	6.0	6.0	6.0	0.0	6.0	6.0	6.0	6.0	0.0	1	1	0	1	0	1	1	1	1	1	1	0	0	0	0	1	10
1101010011011010	9.543755747510467	9.611099349762624	9.493971462208082	9.549608853160391	0.023998019519185423	6.4025068776765135	6.652616765751686	6.360174485373155	6.471766042933784	0.06452163179553222	6.0	6.0	6.0	6.0	0.0	1	1	0	1	0	1	0	0	1	1	0	1	1	0	1	0	9
1001000111111111	9.600272229344725	9.445477505914226	9.565207037383537	9.53698559088083	0.03313530124733545	6.531671901535879	6.2845156243121325	6.0	6.272062508616004	0.10861634529280899	6.0	6.0	6.0	6.0	0.0	1	0	0	1	0	0	0	1	1	1	1	1	1	1	1	1	11
1111101001110111	9.517515178370054	9.510200764842407	9.47335352895222	9.500356490721561	0.009663031956471198	6.0	6.0	6.0	6.0	0.0	6.0	6.0	6.0	6.0	0.0	1	1	1	1	1	0	1	0	0	1	1	1	0	1	1	1	12
1111011101011001	9.444081553539176	9.505187208937052	9.498299494390581	9.482522752288936	0.013663543183153179	6.0	6.0	6.0	6.0	0.0	6.0	6.0	6.0	6.0	0.0	1	1	1	1	0	1	1	1	0	1	0	1	1	0	0	1	11
1111010001101110	9.622710909207314	9.536326902399058	9.569222323001037	9.576086711535803	0.017799293200056045	6.0	6.0	6.0	6.0	0.0	6.0	6.0	6.0	6.0	0.0	1	1	1	1	0	1	0	0	0	1	1	0	1	1	1	0	10
1101111111001011	9.653341231525859	9.613531236615607	9.550947893665672	9.605940120602378	0.021072563881669764	7.3668254951447585	7.340768125005696	7.507705896737857	7.40509983896277	0.03666458089616667	6.0	6.0	6.0	6.0	0.0	1	1	0	1	1	1	1	1	1	1	0	0	1	0	1	1	12
1101101001110011	9.472514824726817	9.515188347597087	9.366405647169397	9.451369606497767	0.03127675701727116	6.0	6.0	6.0	6.0	0.0	6.0	6.0	6.0	6.0	0.0	1	1	0	1	1	0	1	0	0	1	1	1	0	0	1	1	10
1101010001111101	9.503071649266985	9.526027062860576	9.48425732359017	9.504452011905911	0.008540168133011701	6.0	6.0	6.0	6.0	0.0	6.0	6.0	6.0	6.0	0.0	1	1	0	1	0	1	0	0	0	1	1	1	1	1	0	1	10
1001110011001111	9.631653158531133	9.648928054779876	9.495781654946224	9.592120956085745	0.03424312879527703	7.514657771025133	7.672313349069108	7.684401515836218	7.6237908786434865	0.03866319810831457	6.0	6.0	6.0	6.0	0.0	1	0	0	1	1	1	0	0	1	1	0	0	1	1	1	1	10
1001010111010101	9.537181683339425	9.539532941444888	9.531990318427273	9.536234981070528	0.0015755937709275776	6.887648446978622	6.8162752969483655	6.0	6.567974581308995	0.20133714485747412	6.0	6.0	6.0	6.0	0.0	1	0	0	1	0	1	0	1	1	1	0	1	0	1	0	1	9
1111011111101100	9.573115674872641	9.60463229506888	9.561549877891007	9.57976594927751	0.009103051500431995	6.118869033766908	6.5484936888932905	6.0	6.222454240886733	0.11779838216170122	6.0	6.0	6.0	6.0	0.0	1	1	1	1	0	1	1	1	1	1	1	0	1	1	0	0	12
1111011110110101	9.343141091151564	9.407683973414919	9.326048834164776	9.358957966243754	0.017576993217266402	6.0	6.0	6.0	6.0	0.0	6.0	6.0	6.0	6.0	0.0	1	1	1	1	0	1	1	1	1	0	1	1	0	1	0	1	12
1111000001001011	9.477608627620944	9.528078142188637	9.454096494502725	9.486594421437434	0.015431998231299407	6.0	6.0	6.0	6.0	0.0	6.0	6.0	6.0	6.0	0.0	1	1	1	1	0	0	0	0	0	1	0	0	1	0	1	1	8
1101010101011011	9.528874389924622	9.558614143285249	9.443742638577836	9.510410390595903	0.024339799717898635	6.0	6.0	6.0	6.0	0.0	6.0	6.0	6.0	6.0	0.0	1	1	0	1	0	1	0	1	0	1	0	1	1	0	1	1	10
0001010110111010	9.547216395890583	9.398904901642249	9.341992341977768	9.429371213170201	0.04325385373908149	6.0	6.0	6.0	6.0	0.0	6.0	6.0	6.0	6.0	0.0	0	0	0	1	0	1	0	1	1	0	1	1	1	0	1	0	8
1111111011011111	9.591107155657491	9.604418958532976	9.491655789089943	9.562393967760137	0.025156902515781263	8.489781372558692	8.42416958419399	8.53715776213876	8.483702906297147	0.0231635234182586	7.1164985622641215	7.144154681099169	7.6517103694251825	7.304121204262824	0.12302092371554342	1	1	1	1	1	1	1	0	1	1	0	1	1	1	1	1	14
1111110011001011	9.509275915988754	9.600868507764078	9.480187111103703	9.530110511618846	0.02571173582976184	8.065257231612739	8.040275377242484	8.255532210957393	8.120354939937537	0.04806366301102718	6.0	6.0	6.0	6.0	0.0	1	1	1	1	1	1	0	0	1	1	0	0	1	0	1	1	11
1111110011000011	9.545815075080768	9.59058364274575	9.543754815253566	9.56005117769336	0.010803045359761763	7.9249077176694325	7.865967204651384	7.931812440550227	7.907562454290349	0.01477352583684144	6.0	6.0	6.0	6.0	0.0	1	1	1	1	1	1	0	0	1	1	0	0	0	0	1	1	10
1101101111100111	9.524445555883824	9.575165927431481	9.481898987953553	9.52717015708962	0.019062389185220394	6.909983151802438	6.9044363005287375	6.9981375260495575	6.937518992793578	0.021461775401641008	6.0	6.0	6.0	6.0	0.0	1	1	0	1	1	0	1	1	1	1	1	0	0	1	1	1	12
1101111101011010	9.62755757190773	9.706598052933288	9.588989816521853	9.64104848045429	0.024475933002341774	6.0	6.0	6.0	6.0	0.0	6.0	6.0	6.0	6.0	0.0	1	1	0	1	1	1	1	1	0	1	0	1	1	0	1	0	11
1101101011101101	9.598359438922287	9.497607214277645	9.511442273551854	9.535802975583929	0.02229661986838952	7.190940259726568	7.0257791481723775	7.129448387858533	7.115389265252493	0.03407783343267944	6.0	6.0	6.0	6.0	0.0	1	1	0	1	1	0	1	0	1	1	1	0	1	1	0	1	11
1111101111011001	9.526129880811814	9.564991276695187	9.518614049742581	9.536578402416527	0.010161942873178804	7.556708462209361	7.6284057109418395	7.711748764356527	7.632287645835909	0.03167721548779828	6.0	6.0	6.0	6.0	0.0	1	1	1	1	1	0	1	1	1	1	0	1	1	0	0	1	12
1101111110010001	9.546350750837377	9.498964479445501	9.424772979246884	9.490029403176587	0.02501721183230994	6.0	6.0	6.0	6.0	0.0	6.0	6.0	6.0	6.0	0.0	1	1	0	1	1	1	1	1	1	0	0	1	0	0	0	1	10
1100010011100101	9.572211393538536	9.536395796823902	9.518688481457216	9.54243189060655	0.011131796429828695	6.0	6.0	6.0	6.0	0.0	6.0	6.0	6.0	6.0	0.0	1	1	0	0	0	1	0	0	1	1	1	0	0	1	0	1	8
1001111011010011	9.597143726312328	9.547476945047423	9.514236041444725	9.552952237601493	0.017033815260342842	6.765796489242022	6.912980635357852	7.011934727366179	6.896903950655351	0.05056324902203143	6.0	6.0	6.0	6.0	0.0	1	0	0	1	1	1	1	0	1	1	0	1	0	0	1	1	10
0100000011011101	9.522112822619984	9.438315437393376	9.38007753218526	9.446835264066207	0.029148889393138356	6.0	6.0	6.0	6.0	0.0	6.0	6.0	6.0	6.0	0.0	0	1	0	0	0	0	0	0	1	1	0	1	1	1	0	1	7
1111011101001101	9.370825867195038	9.518071714083176	9.475411291769946	9.454769624349387	0.03092974210981237	6.0	6.0	6.0	6.0	0.0	6.0	6.0	6.0	6.0	0.0	1	1	1	1	0	1	1	1	0	1	0	0	1	1	0	1	11
0111110101110011	9.55634343903313	9.555787812000297	9.486453474385664	9.532861575139696	0.016408133359441236	6.609659784956758	6.9207926122077525	6.6562084544745685	6.72888695054636	0.06851098682175281	6.0	6.0	6.0	6.0	0.0	0	1	1	1	1	1	0	1	0	1	1	1	0	0	1	1	11
1111111010011011	9.568298341922393	9.466728236801911	9.413620589157189	9.482882389293833	0.03208587249390965	6.335517619699634	6.002800568029535	6.193144801268207	6.177154329665792	0.06815048361843756	6.0	6.0	6.0	6.0	0.0	1	1	1	1	1	1	1	0	1	0	0	1	1	0	1	1	12
1011111110010001	9.555967485416128	9.46428099215092	9.464171573229974	9.494806683599007	0.02162362038878577	6.0	6.0	6.0	6.0	0.0	6.0	6.0	6.0	6.0	0.0	1	0	1	1	1	1	1	1	1	0	0	1	0	0	0	1	10
0111011111101101	9.5607239125499	9.485701940325551	9.490484120825617	9.512303324567023	0.017147071266154435	6.603258335112914	6.824810350366668	6.6931096564458255	6.7070594473084695	0.04549225458724377	6.0	6.0	6.0	6.0	0.0	0	1	1	1	0	1	1	1	1	1	1	0	1	1	0	1	12
0101111111100011	9.549111334591887	9.557387479245259	9.46101867391795	9.522505829251699	0.021804534489635673	6.97872158002855	7.067874381390223	6.9563362465313725	7.000977402650048	0.02408900202847591	6.0	6.0	6.0	6.0	0.0	0	1	0	1	1	1	1	1	1	1	1	0	0	0	1	1	11
0011111101011100	9.662799804940068	9.557874747559	9.438815721510359	9.55316342466981	0.04575089221349747	6.0	6.0	6.0	6.0	0.0	6.0	6.0	6.0	6.0	0.0	0	0	1	1	1	1	1	1	0	1	0	1	1	1	0	0	10
1110101111100011	9.56554548635006	9.584974356437774	9.567243604566993	9.572587815784944	0.004392999988198166	6.0	6.0	6.0	6.0	0.0	6.0	6.0	6.0	6.0	0.0	1	1	1	0	1	0	1	1	1	1	1	0	0	0	1	1	11
1101010110001001	9.42046880366428	9.424237135006381	9.377313073673953	9.407339670781537	0.010643836093187755	6.0	6.0	6.0	6.0	0.0	6.0	6.0	6.0	6.0	0.0	1	1	0	1	0	1	0	1	1	0	0	0	1	0	0	1	8
1001111011110011	9.645090197338485	9.595288546553231	9.586045443750539	9.60880806254742	0.012965683656632	6.946056786255549	6.996644849261261	6.341867718885847	6.761523118134218	0.1487294964123348	6.0	6.0	6.0	6.0	0.0	1	0	0	1	1	1	1	0	1	1	1	1	0	0	1	1	11
1001011101011101	9.487856859212792	9.493476625074543	9.434265156333204	9.47186621354018	0.013343382063760498	6.0	6.0	6.0	6.0	0.0	6.0	6.0	6.0	6.0	0.0	1	0	0	1	0	1	1	1	0	1	0	1	1	1	0	1	10
0111101011110011	9.497949682040788	9.481179633397597	9.325547360344666	9.434892225261017	0.03881050812506626	7.348349854001228	7.387814840483973	7.473973625951321	7.403379440145507	0.0262266581671847	6.0	6.0	6.0	6.0	0.0	0	1	1	1	1	0	1	0	1	1	1	1	0	0	1	1	11
0111000101111101	9.493970309052262	9.404155497973992	9.381852332993278	9.42665938000651	0.02422955725551913	6.0	6.0	6.0	6.0	0.0	6.0	6.0	6.0	6.0	0.0	0	1	1	1	0	0	0	1	0	1	1	1	1	1	0	1	10
1111100001101111	9.51773239880901	9.510741192136162	9.39629063471245	9.474921408552541	0.02783678079060212	6.0	6.0	6.0	6.0	0.0	6.0	6.0	6.0	6.0	0.0	1	1	1	1	1	0	0	0	0	1	1	0	1	1	1	1	11
1011011111101101	9.565548248957192	9.509594926395836	9.53858181382365	9.537908329725559	0.011423905943507036	6.0	6.0	6.0	6.0	0.0	6.0	6.0	6.0	6.0	0.0	1	0	1	1	0	1	1	1	1	1	1	0	1	1	0	1	12
0010010011111111	9.547629430967902	9.482723930928536	9.400106795812258	9.476820052569565	0.030185188988350056	6.0	6.0	6.0	6.0	0.0	6.0	6.0	6.0	6.0	0.0	0	0	1	0	0	1	0	0	1	1	1	1	1	1	1	1	10
1111011001010011	9.496854982070298	9.476183334279476	9.517912550676924	9.496983622342233	0.008518062050000242	6.0	6.0	6.0	6.0	0.0	6.0	6.0	6.0	6.0	0.0	1	1	1	1	0	1	1	0	0	1	0	1	0	0	1	1	10
1100010111111101	9.577345918751297	9.489747692407713	9.557020199933381	9.541371270364131	0.01871732291280357	6.0	6.0	6.0	6.0	0.0	6.0	6.0	6.0	6.0	0.0	1	1	0	0	0	1	0	1	1	1	1	1	1	1	0	1	11
1011110001110011	9.5141725210857	9.559558590608047	9.539076516451424	9.537602542715057	0.009279037985368478	6.0	6.0	6.0	6.0	0.0	6.0	6.0	6.0	6.0	0.0	1	0	1	1	1	1	0	0	0	1	1	1	0	0	1	1	10
1001011011001101	9.612773020617373	9.511248052704486	9.537959592228033	9.553993555183297	0.021485055866292627	6.0	6.0	6.0	6.0	0.0	6.0	6.0	6.0	6.0	0.0	1	0	0	1	0	1	1	0	1	1	0	0	1	1	0	1	9
0111000101010011	9.520072759007704	9.465610772127967	9.327868376268343	9.437850635801338	0.0404425519774849	6.0	6.0	6.0	6.0	0.0	6.0	6.0	6.0	6.0	0.0	0	1	1	1	0	0	0	1	0	1	0	1	0	0	1	1	8
0101111001101101	9.541317767076631	9.481184009504911	9.428109120482679	9.483536965688074	0.023123587228947584	6.0	6.0	6.0	6.0	0.0	6.0	6.0	6.0	6.0	0.0	0	1	0	1	1	1	1	0	0	1	1	0	1	1	0	1	10
1111100010001101	9.386561142970491	9.385355347252004	9.384441880736864	9.385452790319787	0.00043396226166834165	6.0	6.0	6.0	6.0	0.0	6.0	6.0	6.0	6.0	0.0	1	1	1	1	1	0	0	0	1	0	0	0	1	1	0	1	9
1111011011111011	9.5498691154147	9.586304257805443	9.597685427594156	9.577952933604765	0.010197290404313464	6.904148218579497	6.713662354772016	6.928505193862453	6.848771922404655	0.048026489237091366	6.0	6.0	6.0	6.0	0.0	1	1	1	1	0	1	1	0	1	1	1	1	1	0	1	1	13
1111010111110011	9.556757539478848	9.577860547204605	9.509826337160117	9.54814814128119	0.014217094974529455	7.704935746834224	8.010810411788333	7.8790838217393615	7.864943326787306	0.0626362419893812	6.0	6.0	6.0	6.0	0.0	1	1	1	1	0	1	0	1	1	1	1	1	0	0	1	1	12
1111010001101101	9.498729508570236	9.454536742705839	9.554753884487317	9.502673378587799	0.020504204689724723	6.0	6.0	6.0	6.0	0.0	6.0	6.0	6.0	6.0	0.0	1	1	1	1	0	1	0	0	0	1	1	0	1	1	0	1	10
1110010011100101	9.529859687271973	9.478444351124491	9.482712275998011	9.497005438131492	0.011648355110058134	6.0	6.0	6.0	6.0	0.0	6.0	6.0	6.0	6.0	0.0	1	1	1	0	0	1	0	0	1	1	1	0	0	1	0	1	9
1101111110011111	9.532251028228783	9.54053776967087	9.373495832396012	9.482094876765222	0.038432802502899356	6.0	6.0	6.0	6.0	0.0	6.0	6.0	6.0	6.0	0.0	1	1	0	1	1	1	1	1	1	0	0	1	1	1	1	1	13
1101111010010011	9.545976545681464	9.477324726931727	9.480759727904179	9.501353666839123	0.01579214359026804	6.0	6.0	6.0	6.0	0.0	6.0	6.0	6.0	6.0	0.0	1	1	0	1	1	1	1	0	1	0	0	1	0	0	1	1	10
1101011011000011	9.616902381058516	9.571113551653811	9.517658773547328	9.568558235419884	0.02027815178441313	6.0	6.0	6.0	6.0	0.0	6.0	6.0	6.0	6.0	0.0	1	1	0	1	0	1	1	0	1	1	0	0	0	0	1	1	9
1100010011011011	9.543725882437963	9.573031292364057	9.468308391892434	9.528355188898152	0.02205642436917374	6.0	6.0	6.0	6.0	0.0	6.0	6.0	6.0	6.0	0.0	1	1	0	0	0	1	0	0	1	1	0	1	1	0	1	1	9
1010010011110011	9.581431450460462	9.486292371438736	9.435637902530752	9.501120574809983	0.03021822398790023	6.0	6.0	6.0	6.0	0.0	6.0	6.0	6.0	6.0	0.0	1	0	1	0	0	1	0	0	1	1	1	1	0	0	1	1	9
1111101111111101	9.583911823395225	9.577171768207164	9.508989933161518	9.556691174921303	0.016920960547269825	7.812179701887202	7.811745477234504	8.00444622193405	7.876123800351919	0.04536891382192748	6.0	6.0	6.0	6.0	0.0	1	1	1	1	1	0	1	1	1	1	1	1	1	1	0	1	14
1111010010100011	9.488501249325633	9.434333413038116	9.344868573726536	9.422567745363429	0.02961252431211114	6.0	6.0	6.0	6.0	0.0	6.0	6.0	6.0	6.0	0.0	1	1	1	1	0	1	0	0	1	0	1	0	0	0	1	1	9
1101111011111111	9.585707096464333	9.650641693569012	9.451549175996007	9.562632655343117	0.041450331750143385	7.369969856025058	7.42047959214961	7.480298770334393	7.423582739503021	0.02254750346783384	6.0	6.0	6.0	6.0	0.0	1	1	0	1	1	1	1	0	1	1	1	1	1	1	1	1	14
1101000011010001	9.550548157566654	9.54031796292294	9.49590007998544	9.528922066825011	0.011860318515514244	6.992396403113324	6.790475249643352	6.437090395878025	6.7399873495449	0.1147482472343739	6.0	6.0	6.0	6.0	0.0	1	1	0	1	0	0	0	0	1	1	0	1	0	0	0	1	7
1001110001111101	9.631698900500604	9.555369058981102	9.514960500555986	9.567342820012565	0.024202244111983715	6.0	6.0	6.0	6.0	0.0	6.0	6.0	6.0	6.0	0.0	1	0	0	1	1	1	0	0	0	1	1	1	1	1	0	1	10
1001000111111011	9.60654326192824	9.490298508956057	9.505961898548325	9.534267889810874	0.025752451353892345	6.380808380573236	6.194032803813366	6.0	6.191613728128868	0.07773689023888868	6.0	6.0	6.0	6.0	0.0	1	0	0	1	0	0	0	1	1	1	1	1	1	0	1	1	10
1111000001101111	9.512867602168011	9.489374000988846	9.448283334505238	9.483508312554031	0.013345327727928697	6.0	6.0	6.0	6.0	0.0	6.0	6.0	6.0	6.0	0.0	1	1	1	1	0	0	0	0	0	1	1	0	1	1	1	1	10
1101110111011011	9.571804553161753	9.62852843642424	9.494253662480974	9.564862217355655	0.027518405202131804	7.749272694617903	7.725099996026117	7.963207785300161	7.812526825314727	0.05350178130352492	6.0	6.0	6.0	6.0	0.0	1	1	0	1	1	1	0	1	1	1	0	1	1	0	1	1	12
1001111001001101	9.652398380068764	9.54892379833034	9.532216960785613	9.577846379728237	0.026577810830548967	6.0	6.0	6.0	6.0	0.0	6.0	6.0	6.0	6.0	0.0	1	0	0	1	1	1	1	0	0	1	0	0	1	1	0	1	9
1001100111010001	9.574672303958279	9.477276938533828	9.519093298660787	9.523680847050963	0.019946797995813448	7.022508627590049	6.744980433493696	6.211672061239523	6.6597203741077555	0.16823393565095013	6.0	6.0	6.0	6.0	0.0	1	0	0	1	1	0	0	1	1	1	0	1	0	0	0	1	8
1111111010110011	9.503260939097423	9.453316390316523	9.490555395935854	9.4823775751166	0.010596949665240024	6.875406237252504	6.544962953869852	6.3572157714779625	6.592528320866773	0.10710367859234404	6.0	6.0	6.0	6.0	0.0	1	1	1	1	1	1	1	0	1	0	1	1	0	0	1	1	12
1111111001011011	9.578199897808009	9.611759016676006	9.504310849304638	9.564756587929551	0.022441847455265992	6.0	6.0	6.0	6.0	0.0	6.0	6.0	6.0	6.0	0.0	1	1	1	1	1	1	1	0	0	1	0	1	1	0	1	1	12
1111101101110001	9.447998554699966	9.479704920791193	9.476173895854311	9.467959123781823	0.007093838556920506	6.0	6.0	6.0	6.0	0.0	6.0	6.0	6.0	6.0	0.0	1	1	1	1	1	0	1	1	0	1	1	1	0	0	0	1	11
1111101010100011	9.417542244005887	9.436824695169566	9.385239948146767	9.413202295774072	0.010640902956224038	6.0	6.0	6.0	6.0	0.0	6.0	6.0	6.0	6.0	0.0	1	1	1	1	1	0	1	0	1	0	1	0	0	0	1	1	10
1111100101010001	9.512707704178672	9.436843235766359	9.456680023241331	9.468743654395453	0.016062392875584353	6.0	6.0	6.0	6.0	0.0	6.0	6.0	6.0	6.0	0.0	1	1	1	1	1	0	0	1	0	1	0	1	0	0	0	1	9
1111000101011110	9.538950789491373	9.542013576617288	9.546086539957457	9.542350302022038	0.0014614360333366028	6.0	6.0	6.0	6.0	0.0	6.0	6.0	6.0	6.0	0.0	1	1	1	1	0	0	0	1	0	1	0	1	1	1	1	0	10
1101111001111111	9.524900337030363	9.689135767635053	9.509978094141182	9.5746713996022	0.04058373441639169	6.0	6.0	6.0	6.0	0.0	6.0	6.0	6.0	6.0	0.0	1	1	0	1	1	1	1	0	0	1	1	1	1	1	1	1	13
1101110001001101	9.610317557259972	9.502912391850533	9.558555740631949	9.557261896580817	0.021928759326049145	6.0	6.0	6.0	6.0	0.0	6.0	6.0	6.0	6.0	0.0	1	1	0	1	1	1	0	0	0	1	0	0	1	1	0	1	9
1101011011011011	9.569268426642038	9.596308471092195	9.477103110269868	9.547560002668034	0.025514444489908333	6.0	6.0	6.0	6.0	0.0	6.0	6.0	6.0	6.0	0.0	1	1	0	1	0	1	1	0	1	1	0	1	1	0	1	1	11
1011000111010001	9.598748606920367	9.53056653978549	9.482042588976071	9.53711924522731	0.023934901704272087	7.310565152611793	7.091917440040377	7.003136787816078	7.135206460156083	0.06459296184205535	6.0	6.0	6.0	6.0	0.0	1	0	1	1	0	0	0	1	1	1	0	1	0	0	0	1	8
1011000010011111	9.463858204591467	9.360004006546273	9.414036912328523	9.412633041155422	0.02120495914326656	6.0	6.0	6.0	6.0	0.0	6.0	6.0	6.0	6.0	0.0	1	0	1	1	0	0	0	0	1	0	0	1	1	1	1	1	9
1001110011101111	9.573413694441467	9.599353870413749	9.539815636203734	9.57086106701965	0.012186654334951837	7.616142967028755	7.474963427039024	7.418660538155682	7.503255644074486	0.04153344954569424	6.0	6.0	6.0	6.0	0.0	1	0	0	1	1	1	0	0	1	1	1	0	1	1	1	1	11
1111111111000101	9.609110719094524	9.54743967975233	9.619610151709553	9.592053516852134	0.01591830899145902	7.9502766465832035	8.028324207570973	7.895840594750353	7.9581471496348435	0.02718588950851596	6.0	6.0	6.0	6.0	0.0	1	1	1	1	1	1	1	1	1	1	0	0	0	1	0	1	12
1111110110100001	9.487336840567039	9.472124248628823	9.471809542995404	9.477090210730422	0.003623300225977572	6.830504591765642	6.407462064843527	6.0	6.412655552203056	0.1695359836284366	6.0	6.0	6.0	6.0	0.0	1	1	1	1	1	1	0	1	1	0	1	0	0	0	0	1	10
1101101101011101	9.528352992977943	9.423930295951662	9.39023373899961	9.447505675976407	0.029399776040434176	6.0	6.0	6.0	6.0	0.0	6.0	6.0	6.0	6.0	0.0	1	1	0	1	1	0	1	1	0	1	0	1	1	1	0	1	11
1101010011101101	9.59072053243042	9.537479107388583	9.567245446844764	9.565148362221256	0.0108931221271347	6.834584693254642	6.918711499293377	7.143241221418804	6.965512471322274	0.06514082351813616	6.0	6.0	6.0	6.0	0.0	1	1	0	1	0	1	0	0	1	1	1	0	1	1	0	1	10
1001000111101101	9.601939248659995	9.55020502488412	9.519177182436195	9.557107151993437	0.017069072521098207	6.931348086065947	6.442708251905673	6.625728107541669	6.666594815171096	0.10078424788163151	6.0	6.0	6.0	6.0	0.0	1	0	0	1	0	0	0	1	1	1	1	0	1	1	0	1	9
1111011101011101	9.491729880686934	9.554083361538419	9.500507211341189	9.515440151188848	0.013779414978779403	6.0	6.0	6.0	6.0	0.0	6.0	6.0	6.0	6.0	0.0	1	1	1	1	0	1	1	1	0	1	0	1	1	1	0	1	12
1101111010001111	9.530081266431882	9.49350174098619	9.472591410193463	9.498724805870511	0.011879472474734875	6.0	6.0	6.0	6.0	0.0	6.0	6.0	6.0	6.0	0.0	1	1	0	1	1	1	1	0	1	0	0	0	1	1	1	1	11
1101111001011101	9.625960002834434	9.611399486016882	9.50251059784864	9.579956695566652	0.027542166766945438	6.0	6.0	6.0	6.0	0.0	6.0	6.0	6.0	6.0	0.0	1	1	0	1	1	1	1	0	0	1	0	1	1	1	0	1	11
1101011111011101	9.619571686710989	9.518734436285804	9.490784443797256	9.54303018893135	0.027656377148228557	6.0	6.0	6.0	6.0	0.0	6.0	6.0	6.0	6.0	0.0	1	1	0	1	0	1	1	1	1	1	0	1	1	1	0	1	12
1111011111101001	9.565026617309384	9.593645974890183	9.549352270243789	9.56934162081445	0.009169219425720545	6.801916327438611	6.37336309959734	6.0901948796205225	6.42182476888549	0.14628639425439546	6.0	6.0	6.0	6.0	0.0	1	1	1	1	0	1	1	1	1	1	1	0	1	0	0	1	12
1111001101010011	9.434861742969137	9.530584879912562	9.462906457639713	9.476117693507137	0.02008993239341105	6.0	6.0	6.0	6.0	0.0	6.0	6.0	6.0	6.0	0.0	1	1	1	1	0	0	1	1	0	1	0	1	0	0	1	1	10
1101111011000011	9.587551463359745	9.600496103788617	9.566486184643502	9.58484458393062	0.0070079008655370865	7.52739892029541	7.450375264606833	7.493097731266715	7.490290638722986	0.015753680576931526	6.0	6.0	6.0	6.0	0.0	1	1	0	1	1	1	1	0	1	1	0	0	0	0	1	1	10
1101110110011101	9.517429809013043	9.494849440477363	9.502967095757755	9.50508211508272	0.004669461797332959	6.0	6.0	6.0	6.0	0.0	6.0	6.0	6.0	6.0	0.0	1	1	0	1	1	1	0	1	1	0	0	1	1	1	0	1	11
1101101101011010	9.501885911484846	9.618305972548088	9.432910610445106	9.51770083149268	0.03825450701870431	6.0	6.0	6.0	6.0	0.0	6.0	6.0	6.0	6.0	0.0	1	1	0	1	1	0	1	1	0	1	0	1	1	0	1	0	10
0101101011111111	9.530875934619909	9.466536454069258	9.418326633780417	9.471913007489862	0.023052537007446135	6.8459235110209535	7.055524419191067	6.987806590497558	6.963084840236526	0.04366827391140831	6.0	6.0	6.0	6.0	0.0	0	1	0	1	1	0	1	0	1	1	1	1	1	1	1	1	12
1111110101011011	9.54178341848219	9.659668277101883	9.509921185681593	9.570457627088556	0.03220431008061437	6.288716294126803	6.654932606803821	6.200806539020059	6.381485146650228	0.09832951943937472	6.0	6.0	6.0	6.0	0.0	1	1	1	1	1	1	0	1	0	1	0	1	1	0	1	1	12
1101111001000101	9.595954619312486	9.617924351516182	9.517623704634337	9.577167558487668	0.02152428931097645	6.0	6.0	6.0	6.0	0.0	6.0	6.0	6.0	6.0	0.0	1	1	0	1	1	1	1	0	0	1	0	0	0	1	0	1	9
0111111111011011	9.574865397560984	9.462179324142856	9.381673799482149	9.472906173728662	0.039617015217771716	7.942786218004872	8.00040459846264	8.177176036605829	8.04012228435778	0.04986275780512632	6.0	6.0	6.0	6.0	0.0	0	1	1	1	1	1	1	1	1	1	0	1	1	0	1	1	13
1111111010011101	9.567683240958374	9.513603499187036	9.508609212797515	9.529965317647642	0.013374210433335556	6.238102022501144		6.048895948285068	6.143498985393106	0.05461908894048175	6.0	6.0	6.0	6.0	0.0	1	1	1	1	1	1	1	0	1	0	0	1	1	1	0	1	12
1111101011100101	9.531583951075945	9.54204265181616	9.5365731751071	9.536733259333069	0.0021356234652867906	7.655003860522852	7.540563438358205	7.494136778142079	7.563234692341045	0.03380099571090431	6.0	6.0	6.0	6.0	0.0	1	1	1	1	1	0	1	0	1	1	1	0	0	1	0	1	11
1110010111111011	9.488048181074806	9.570908114975596	9.539922502057768	9.532959599369391	0.017091926319643392	6.0	6.0	6.0	6.0	0.0	6.0	6.0	6.0	6.0	0.0	1	1	1	0	0	1	0	1	1	1	1	1	1	0	1	1	12
1101010001000111	9.561234255990893	9.527105481225329	9.399629033935176	9.4959895903838	0.034773579400808344	6.0	6.0	6.0	6.0	0.0	6.0	6.0	6.0	6.0	0.0	1	1	0	1	0	1	0	0	0	1	0	0	0	1	1	1	8
1011010011101101	9.640759987874551	9.534567502273454	9.490784822317341	9.555370770821783	0.031484704110881466	7.031452446315122	6.8922571762069404	7.00855451841347	6.977421380311843	0.030470710037574202	6.0	6.0	6.0	6.0	0.0	1	0	1	1	0	1	0	0	1	1	1	0	1	1	0	1	10
0011011110100111	9.365217510236976	9.314802925219938	9.265418575866413	9.315146337107775	0.020371733988415235	6.0	6.0	6.0	6.0	0.0	6.0	6.0	6.0	6.0	0.0	0	0	1	1	0	1	1	1	1	0	1	0	0	1	1	1	10
1111011111010001	9.625503817184985	9.534326803001663	9.500786133225429	9.553538917804024	0.02634847936612688	6.759697421903312	7.011931805943284	6.7225352129074505	6.831388146918016	0.06428098092883223	6.0	6.0	6.0	6.0	0.0	1	1	1	1	0	1	1	1	1	1	0	1	0	0	0	1	11
1101111001100011	9.67192305498868	9.53710476675951	9.554302360088537	9.587776727278909	0.02995661489097682	6.0	6.0	6.0	6.0	0.0	6.0	6.0	6.0	6.0	0.0	1	1	0	1	1	1	1	0	0	1	1	0	0	0	1	1	10
1011011101011111	9.53230130068084	9.57063813677858	9.447511188724537	9.516816875394651	0.02572251576637488	6.0	6.0	6.0	6.0	0.0	6.0	6.0	6.0	6.0	0.0	1	0	1	1	0	1	1	1	0	1	0	1	1	1	1	1	12
0011010101011011	9.560033955530097	9.43277859157001	9.368670711917787	9.453827753005966	0.039764458899297916	6.0	6.0	6.0	6.0	0.0	6.0	6.0	6.0	6.0	0.0	0	0	1	1	0	1	0	1	0	1	0	1	1	0	1	1	9
1111101010000100	9.485095507588573	9.365063142172778	9.374640115790504	9.408266255183952	0.027233496913141284	6.0	6.0	6.0	6.0	0.0	6.0	6.0	6.0	6.0	0.0	1	1	1	1	1	0	1	0	1	0	0	0	0	1	0	0	8
1111011011101111	9.614943671272655	9.543132325222398	9.497409866488091	9.551828620994382	0.02418769655182628	6.488416607081499	7.162889513217071	6.846006751934938	6.832437624077836	0.13775976444572086	6.0	6.0	6.0	6.0	0.0	1	1	1	1	0	1	1	0	1	1	1	0	1	1	1	1	13
1111001011010101	9.617551952522408	9.507035754323507	9.460050080255641	9.528212595700518	0.033010235533630576	7.312867634418402	7.1402980174806965	7.3669800450359055	7.273381898978335	0.04833136987086714	6.0	6.0	6.0	6.0	0.0	1	1	1	1	0	0	1	0	1	1	0	1	0	1	0	1	10
1111000001111101	9.43386051430632	9.42005976943831	9.52331720227648	9.459079162007036	0.022885619585859173	6.0	6.0	6.0	6.0	0.0	6.0	6.0	6.0	6.0	0.0	1	1	1	1	0	0	0	0	0	1	1	1	1	1	0	1	10
1101001011110101	9.603452778358335	9.512075333753279	9.624902242468501	9.580143451526704	0.024460755543543926	6.802684088336264	6.945648065565464	6.0	6.58277738463391	0.2080992490483217	6.0	6.0	6.0	6.0	0.0	1	1	0	1	0	0	1	0	1	1	1	1	0	1	0	1	10
1011111101000101	9.712456288433804	9.620616839960908	9.537517185399384	9.623530104598032	0.035724146306003166	6.0	6.0	6.0	6.0	0.0	6.0	6.0	6.0	6.0	0.0	1	0	1	1	1	1	1	1	0	1	0	0	0	1	0	1	10
0101000101011001	9.501068961725883	9.410887477062342	9.3560568769938	9.422671105260674	0.029892213589616603	6.0	6.0	6.0	6.0	0.0	6.0	6.0	6.0	6.0	0.0	0	1	0	1	0	0	0	1	0	1	0	1	1	0	0	1	7
1111111001000111	9.586334938415806	9.544624355812543	9.512748719449867	9.54790267122607	0.015065376526928277	6.0	6.0	6.0	6.0	0.0	6.0	6.0	6.0	6.0	0.0	1	1	1	1	1	1	1	0	0	1	0	0	0	1	1	1	11
1111100111111101	9.595984694387417	9.554544208541834	9.517666057654466	9.556064986861239	0.015995763970238778	8.042778729556074	8.324822287476985	8.019310144979302	8.128970387337453	0.0694096159364921	6.0	6.0	6.0	6.0	0.0	1	1	1	1	1	0	0	1	1	1	1	1	1	1	0	1	13
1111010111101101	9.576036222632496	9.526056744839268	9.494872586945585	9.532321851472448	0.016714876658849253	7.379857002560407	7.459127865759169	7.452780133738	7.430588334019192	0.01798297537088414	6.0	6.0	6.0	6.0	0.0	1	1	1	1	0	1	0	1	1	1	1	0	1	1	0	1	12
1111000001000010	9.453973928455252	9.536198936209699	9.544051191347418	9.511408018670789	0.020369178173782736	6.0	6.0	6.0	6.0	0.0	6.0	6.0	6.0	6.0	0.0	1	1	1	1	0	0	0	0	0	1	0	0	0	0	1	0	6
1101100111011001	9.493228689577334	9.516808292948754	9.487090439492153	9.49904247400608	0.006404916998615932	7.351722802867028	6.894140294814624	7.1160021135281815	7.120621737069945	0.09341791727690912	6.0	6.0	6.0	6.0	0.0	1	1	0	1	1	0	0	1	1	1	0	1	1	0	0	1	10
1001011011000001	9.627804637005916	9.506586460094852	9.513908762122897	9.549433286407888	0.027748740129558767	6.0	6.0	6.0	6.0	0.0	6.0	6.0	6.0	6.0	0.0	1	0	0	1	0	1	1	0	1	1	0	0	0	0	0	1	7
0101011011001101	9.531471926798098	9.45614262432181	9.483666299572292	9.490426950230733	0.015561200419018227	6.0	6.0	6.0	6.0	0.0	6.0	6.0	6.0	6.0	0.0	0	1	0	1	0	1	1	0	1	1	0	0	1	1	0	1	9
1111011111100001	9.58549422205836	9.528304457323264	9.579670123969828	9.56448960111715	0.012848498635861459	6.877260398026994	6.018641368472236	6.0	6.29863392216641	0.20461073777613215	6.0	6.0	6.0	6.0	0.0	1	1	1	1	0	1	1	1	1	1	1	0	0	0	0	1	11
1101000011101011	9.512941551572137	9.562955467869513	9.58400129730468	9.553299438915444	0.014901348022157628	6.814411566238855	6.843185872367022	6.5465641272189865	6.734720521941621	0.06678212314379038	6.0	6.0	6.0	6.0	0.0	1	1	0	1	0	0	0	0	1	1	1	0	1	0	1	1	9
1100101011110011	9.617050442356762	9.611046694660574	9.509191468392627	9.579096201803322	0.024745420658898357	6.0	6.0	6.0	6.0	0.0	6.0	6.0	6.0	6.0	0.0	1	1	0	0	1	0	1	0	1	1	1	1	0	0	1	1	10
0011010011010000	9.611504120800243	9.434490511393095	9.404923413447532	9.483639348546957	0.045608119357137024	6.432749437306132	6.343759487209282	6.4173758929803775	6.397961605831931	0.019418585228554112	6.0	6.0	6.0	6.0	0.0	0	0	1	1	0	1	0	0	1	1	0	1	0	0	0	0	6
1111101011010001	9.49480969480443	9.527853006255556	9.460159899712187	9.494274200257392	0.013819094484205771	7.958060113037687	7.692738476644032	7.784678019291149	7.81182553632429	0.05500247486166759	6.0	6.0	6.0	6.0	0.0	1	1	1	1	1	0	1	0	1	1	0	1	0	0	0	1	10
1111011111100101	9.675919450597695	9.497417464601627	9.514409386209543	9.562582100469621	0.040220636391704985	6.978949511102508	6.686140196012151	6.096124185035206	6.5870712973832894	0.18357837749088318	6.0	6.0	6.0	6.0	0.0	1	1	1	1	0	1	1	1	1	1	1	0	0	1	0	1	12
1101110011100101	9.65595046389223	9.561573393560565	9.732774544411168	9.650099467287989	0.035007461428696124	8.070383645316749	7.777952896113828	7.76336070472738	7.870565748719319	0.07070905984246366	6.0	6.0	6.0	6.0	0.0	1	1	0	1	1	1	0	0	1	1	1	0	0	1	0	1	10
1011000111010011	9.504108735899294	9.431895105607245	9.487460441254377	9.474488094253639	0.015437580985050074	7.270216766542807	7.224141836533238	7.2247798820306945	7.239712828368913	0.01078555715298434	6.0	6.0	6.0	6.0	0.0	1	0	1	1	0	0	0	1	1	1	0	1	0	0	1	1	9
1001011111011100	9.564841531763395	9.533568393727002	9.495560775810805	9.5313235671004	0.014164128525246546	6.0	6.0	6.0	6.0	0.0	6.0	6.0	6.0	6.0	0.0	1	0	0	1	0	1	1	1	1	1	0	1	1	1	0	0	10
1111111001111101	9.58849918842629	9.59224234382755	9.576448963163084	9.585730165138974	0.0033691822864865962	6.866423785941835	6.462750973745155	6.0	6.4430582532289975	0.1769950077650221	6.0	6.0	6.0	6.0	0.0	1	1	1	1	1	1	1	0	0	1	1	1	1	1	0	1	13
1111011101000000	9.535250315392917	9.566197161991848	9.553837321280533	9.5517615995551	0.006359484964936591	6.0	6.0	6.0	6.0	0.0	6.0	6.0	6.0	6.0	0.0	1	1	1	1	0	1	1	1	0	1	0	0	0	0	0	0	8
1111000001110011	9.49698005021014	9.46736740933316	9.486203061933747	9.48351684049235	0.00611880930889085	6.0	6.0	6.0	6.0	0.0	6.0	6.0	6.0	6.0	0.0	1	1	1	1	0	0	0	0	0	1	1	1	0	0	1	1	9
1101111111100011	9.611000800095484	9.653610664826381	9.56798919260531	9.610866885842391	0.017477473959816046	7.277856543059933	7.483182810464329	7.494637493628853	7.418558949051039	0.04980073247514255	6.0	6.0	6.0	6.0	0.0	1	1	0	1	1	1	1	1	1	1	1	0	0	0	1	1	12
1101101111010101	9.56745098049303	9.522011620697548	9.51660212079276	9.535354907327779	0.011401272639321367	6.7976922625924585	6.900107004363611	7.115085398398692	6.93762822178492	0.06613179011364541	6.0	6.0	6.0	6.0	0.0	1	1	0	1	1	0	1	1	1	1	0	1	0	1	0	1	11
1011000111011101	9.595090265360808	9.545055997671934	9.572345422743142	9.570830561925293	0.01022723560127205	7.18267341356484	7.262723529991268	7.377574534632387	7.274323826062832	0.039994868212596305	6.0	6.0	6.0	6.0	0.0	1	0	1	1	0	0	0	1	1	1	0	1	1	1	0	1	10
1111101001111111	9.458015041348428	9.52574533475408	9.384477947057071	9.456079441053193	0.028844203976019653	6.0	6.0	6.0	6.0	0.0	6.0	6.0	6.0	6.0	0.0	1	1	1	1	1	0	1	0	0	1	1	1	1	1	1	1	13
1111000111011110	9.48788195176059	9.539917622030377	9.466260246536931	9.4980199401093	0.015456586228123565	7.027164618478137	7.119790299182576	7.367191559077827	7.171382158912846	0.07176451081630016	6.0	6.0	6.0	6.0	0.0	1	1	1	1	0	0	0	1	1	1	0	1	1	1	1	0	11
1101110010010100	9.461563825187095	9.43947404576309	9.451383323861924	9.45080706493737	0.004513657875666573	6.0	6.0	6.0	6.0	0.0	6.0	6.0	6.0	6.0	0.0	1	1	0	1	1	1	0	0	1	0	0	1	0	1	0	0	8
1101011101011111	9.517736909282752	9.573719177893672	9.53117326631073	9.540876451162385	0.011931173782053297	6.0	6.0	6.0	6.0	0.0	6.0	6.0	6.0	6.0	0.0	1	1	0	1	0	1	1	1	0	1	0	1	1	1	1	1	12
1111011101011000	9.575335728676473	9.583665648095495	9.460325258599855	9.539775545123941	0.028141333511850945	6.0	6.0	6.0	6.0	0.0	6.0	6.0	6.0	6.0	0.0	1	1	1	1	0	1	1	1	0	1	0	1	1	0	0	0	10
1111010011001101	9.492656093914134	9.527761548206655	9.54089104110723	9.520436227742673	0.010180846171489748	7.276260354714402	7.353229818512085	7.26187920005796	7.29712312442815	0.020052743964706327	6.0	6.0	6.0	6.0	0.0	1	1	1	1	0	1	0	0	1	1	0	0	1	1	0	1	10
1111010010011011	9.435639782758363	9.427673699046359	9.376097654455453	9.41313704542006	0.013195971510896356	6.0	6.0	6.0	6.0	0.0	6.0	6.0	6.0	6.0	0.0	1	1	1	1	0	1	0	0	1	0	0	1	1	0	1	1	10
1101101111010001	9.509003577517998	9.509046243756783	9.511294754367087	9.509781525213954	0.0005350781803309576	6.836487595148912	7.102930749102441	6.701989998602924	6.8804694476180925	0.08330583599278879	6.0	6.0	6.0	6.0	0.0	1	1	0	1	1	0	1	1	1	1	0	1	0	0	0	1	10
1101100010110111	9.384794506233957	9.419285524651508	9.414797329656226	9.406292453513897	0.007655687172697462	6.0	6.0	6.0	6.0	0.0	6.0	6.0	6.0	6.0	0.0	1	1	0	1	1	0	0	0	1	0	1	1	0	1	1	1	10
1011111101110100	9.681712199844	9.52508629667942	9.554216634478443	9.587005043667288	0.034007911379514325	6.0	6.0	6.0	6.0	0.0	6.0	6.0	6.0	6.0	0.0	1	0	1	1	1	1	1	1	0	1	1	1	0	1	0	0	11
1011000011000101	9.674662538828446	9.48324415387417	9.491015272390758	9.549640655031125	0.04423036502585638	6.659063093284812	6.797082878754929	6.664814889817383	6.7069869539523745	0.03187534977679636	6.0	6.0	6.0	6.0	0.0	1	0	1	1	0	0	0	0	1	1	0	0	0	1	0	1	7
0011011001010111	9.588244099848117	9.413755419699633	9.372640045657821	9.458213188401858	0.046732656220085746	6.0	6.0	6.0	6.0	0.0	6.0	6.0	6.0	6.0	0.0	0	0	1	1	0	1	1	0	0	1	0	1	0	1	1	1	9
1111101011001101	9.522699498349944	9.520141797311977	9.53487857713606	9.525906624265994	0.003214742404841831	7.628906836192702	7.554080305827483	7.489951647556541	7.557646263192242	0.02839211495930175	6.0	6.0	6.0	6.0	0.0	1	1	1	1	1	0	1	0	1	1	0	0	1	1	0	1	11
1111010011001011	9.535039983658061	9.581450771713293	9.475794077177143	9.530761610849497	0.021620062559626837	7.418444929126458	7.180555397530688	7.060260701907783	7.219753676188309	0.07441590773523066	6.0	6.0	6.0	6.0	0.0	1	1	1	1	0	1	0	0	1	1	0	0	1	0	1	1	10
1111001111011100	9.497757286459077	9.554306551996254	9.482325422499807	9.511463086985046	0.015471519409004883	6.738408102574907	6.973243971978242	6.7705286034802095	6.827393559344453	0.05198106833852554	6.0	6.0	6.0	6.0	0.0	1	1	1	1	0	0	1	1	1	1	0	1	1	1	0	0	11
1101101111101101	9.553078175647737	9.542089687696963	9.564653815630848	9.553273892991848	0.004606403085439339	6.990537958679725	7.056829507021702	7.3264801485188755	7.1246158714067676	0.07264127858397688	6.0	6.0	6.0	6.0	0.0	1	1	0	1	1	0	1	1	1	1	1	0	1	1	0	1	12
1001100111011101	9.635551219728098	9.499486401124114	9.521635208839081	9.552224276563765	0.02980541621258548	6.83871310079993	7.083191641486876	7.025861900483185	6.9825888809233305	0.052196511506158845	6.0	6.0	6.0	6.0	0.0	1	0	0	1	1	0	0	1	1	1	0	1	1	1	0	1	10
1111110101100001	9.640658549250137	9.573539717365463	9.485011272508752	9.566403179708118	0.03187139866336115	6.3228050202365775	6.0	6.0	6.107601673412193	0.07608587293678157	6.0	6.0	6.0	6.0	0.0	1	1	1	1	1	1	0	1	0	1	1	0	0	0	0	1	10
1111010101110100	9.607428608218582	9.537947434594695	9.5187595495284	9.554711864113893	0.01904527528933267	6.0	6.0	6.0	6.0	0.0	6.0	6.0	6.0	6.0	0.0	1	1	1	1	0	1	0	1	0	1	1	1	0	1	0	0	10
1101101111100011	9.557570766366352	9.526405545731414	9.562013599606322	9.548663303901364	0.007921390249018563	6.72496378717574	6.827483760170432	6.927002385183803	6.826483310843325	0.04124247294033979	6.0	6.0	6.0	6.0	0.0	1	1	0	1	1	0	1	1	1	1	1	0	0	0	1	1	11
1101100001110101	9.506296634934195	9.442627465700744	9.3785896404502	9.442504580361714	0.026068117294371695	6.0	6.0	6.0	6.0	0.0	6.0	6.0	6.0	6.0	0.0	1	1	0	1	1	0	0	0	0	1	1	1	0	1	0	1	9
1101000011011010	9.523683421826734	9.456377570599651	9.502752868287681	9.49427128690469	0.014062197074768655	6.274645055740482	6.252550679552113	6.0	6.175731911764198	0.06229408609439216	6.0	6.0	6.0	6.0	0.0	1	1	0	1	0	0	0	0	1	1	0	1	1	0	1	0	8
1000010111010011	9.526604876090957	9.54984425480516	9.44981666295942	9.508755264618513	0.021371071782912806	6.0	6.0	6.0	6.0	0.0	6.0	6.0	6.0	6.0	0.0	1	0	0	0	0	1	0	1	1	1	0	1	0	0	1	1	8
1111010010001011	9.39684916830067	9.419034024495813	9.467496302856988	9.427793165217823	0.014749555444688221	6.0	6.0	6.0	6.0	0.0	6.0	6.0	6.0	6.0	0.0	1	1	1	1	0	1	0	0	1	0	0	0	1	0	1	1	9
1111000101110011	9.567191963008836	9.437003764752204	9.441216109553565	9.481803945771535	0.030201465411382633	6.0	6.0	6.0	6.0	0.0	6.0	6.0	6.0	6.0	0.0	1	1	1	1	0	0	0	1	0	1	1	1	0	0	1	1	10
1111111101111111	9.607600593011911	9.6607746617247	9.560810491268377	9.609728582001663	0.020418966251219178	6.338071322246868	6.270973028585327	6.0	6.2030147836107306	0.07307165093985568	6.0	6.0	6.0	6.0	0.0	1	1	1	1	1	1	1	1	0	1	1	1	1	1	1	1	15
1111100011110011	9.554852907641477	9.47687953869933	9.499075230253077	9.510269225531294	0.016400918235287887	8.044252000217108	8.02291047356608	7.801796444550908	7.956319639444698	0.05480560876115926	6.0	6.0	6.0	6.0	0.0	1	1	1	1	1	0	0	0	1	1	1	1	0	0	1	1	11
1110101111110001	9.70150665107708	9.653753589192556	9.55898688162227	9.638082373963968	0.029614639992799327	6.0	6.0	6.0	6.0	0.0	6.0	6.0	6.0	6.0	0.0	1	1	1	0	1	0	1	1	1	1	1	1	0	0	0	1	11
1101101111011101	9.512853372503123	9.575617675084981	9.552394364877964	9.54695513748869	0.012955232633900783	6.763412088417791	7.034246532381995	7.121911391396691	6.973190004065493	0.07629587395641302	6.0	6.0	6.0	6.0	0.0	1	1	0	1	1	0	1	1	1	1	0	1	1	1	0	1	12
1101011110101101	9.429373341007377	9.453988738026915	9.385901998899085	9.423088025977792	0.014074681168864548	6.0	6.0	6.0	6.0	0.0	6.0	6.0	6.0	6.0	0.0	1	1	0	1	0	1	1	1	1	0	1	0	1	1	0	1	11
1101011001101101	9.41669969812903	9.452970922091732	9.4796278986202	9.449766172946987	0.012895040500613473	6.0	6.0	6.0	6.0	0.0	6.0	6.0	6.0	6.0	0.0	1	1	0	1	0	1	1	0	0	1	1	0	1	1	0	1	10
1100010111011001	9.52359502009276	9.526187476776089	9.523036764445902	9.524273087104918	0.0006863646020435675	6.0	6.0	6.0	6.0	0.0	6.0	6.0	6.0	6.0	0.0	1	1	0	0	0	1	0	1	1	1	0	1	1	0	0	1	9
1011101011000011	9.585772652204863	9.531623303616968	9.531326729905118	9.549574228575649	0.012798218586465088	6.759543657667082	6.825635470425718	6.855985082599162	6.813721403563988	0.020131632872264372	6.0	6.0	6.0	6.0	0.0	1	0	1	1	1	0	1	0	1	1	0	0	0	0	1	1	9
1010010011001111	9.512959270330892	9.453853093836646	9.468631789676213	9.478481384614584	0.01255750715229569	6.0	6.0	6.0	6.0	0.0	6.0	6.0	6.0	6.0	0.0	1	0	1	0	0	1	0	0	1	1	0	0	1	1	1	1	9
1101110011000010	9.572796112429561	9.590547373253324	9.5116682529689	9.558337246217262	0.01689315943076798	7.370969595622287	7.421198902778983	7.421353038194837	7.404507178865369	0.011857368010169818	6.0	6.0	6.0	6.0	0.0	1	1	0	1	1	1	0	0	1	1	0	0	0	0	1	0	8
1101100011011011	9.599306088666172	9.47153710211417	9.464931020276637	9.511924737018992	0.030923387969509955	7.207259336799318	6.881666851577522	7.059379915023536	7.049435367800125	0.06655422240904436	6.0	6.0	6.0	6.0	0.0	1	1	0	1	1	0	0	0	1	1	0	1	1	0	1	1	10
1011110001111101	9.588993959354092	9.511931973458195	9.495982045108924	9.53230265930707	0.02030610613975007	6.33313026249052	6.310117971629	6.008253004385548	6.21716707950169	0.07401149625666092	6.0	6.0	6.0	6.0	0.0	1	0	1	1	1	1	0	0	0	1	1	1	1	1	0	1	11
1001011001111101	9.612777437214344	9.49664908045494	9.512578401157224	9.540668306275503	0.025700943199538008	6.0	6.0	6.0	6.0	0.0	6.0	6.0	6.0	6.0	0.0	1	0	0	1	0	1	1	0	0	1	1	1	1	1	0	1	10
0111000011010011	9.475217721887669	9.423685548422698	9.372149574018588	9.423684281442986	0.02103869758918317	7.004261124184777	7.062556243832686	7.113233658414642	7.060017008810703	0.022262034535626068	6.0	6.0	6.0	6.0	0.0	0	1	1	1	0	0	0	0	1	1	0	1	0	0	1	1	8
0101000111010011	9.479904397215993	9.435749897064733	9.445475500324427	9.453709931535052	0.00947153070983224	6.807850247504084	6.69639447308117	6.0	6.5014149068617515	0.17873084001296335	6.0	6.0	6.0	6.0	0.0	0	1	0	1	0	0	0	1	1	1	0	1	0	0	1	1	8
1111011110101111	9.49357175141658	9.453279908968122	9.340036455479373	9.428962705288024	0.03249811935775651	6.0	6.0	6.0	6.0	0.0	6.0	6.0	6.0	6.0	0.0	1	1	1	1	0	1	1	1	1	0	1	0	1	1	1	1	13
1111010101011111	9.496392018853447	9.560314233134136	9.493374926935406	9.516693726307663	0.015434469933449073	6.0	6.0	6.0	6.0	0.0	6.0	6.0	6.0	6.0	0.0	1	1	1	1	0	1	0	1	0	1	0	1	1	1	1	1	12
1101011001110111	9.451715976704417	9.525079422030199	9.499508602571932	9.492101333768849	0.015202518984574555	6.0	6.0	6.0	6.0	0.0	6.0	6.0	6.0	6.0	0.0	1	1	0	1	0	1	1	0	0	1	1	1	0	1	1	1	11
1101000011100111	9.645370723154167	9.553473187323544	9.516323199711085	9.571722370062933	0.027120380803895828	7.131903541505977	6.952370568899661	6.911779313602282	6.998684474669306	0.04782328987756074	6.0	6.0	6.0	6.0	0.0	1	1	0	1	0	0	0	0	1	1	1	0	0	1	1	1	9
1001110011101100	9.592691352877994	9.565761406332497	9.534676260430636	9.564376339880376	0.011852401618282911	7.322799637500463	7.385884522386654	7.180431454714628	7.296371871533915	0.042966189933575406	6.0	6.0	6.0	6.0	0.0	1	0	0	1	1	1	0	0	1	1	1	0	1	1	0	0	9
1000010011010011	9.553554735946118	9.487268783272008	9.475639549991543	9.505487689736556	0.01715925632206028	6.0	6.0	6.0	6.0	0.0	6.0	6.0	6.0	6.0	0.0	1	0	0	0	0	1	0	0	1	1	0	1	0	0	1	1	7
1111111010000111	9.524343877366439	9.44537342454429	9.450397877124336	9.473371726345022	0.018050537460811342	6.0	6.0	6.0	6.0	0.0	6.0	6.0	6.0	6.0	0.0	1	1	1	1	1	1	1	0	1	0	0	0	0	1	1	1	11
1111110001110011	9.493227837564906	9.496112082790779	9.515131153727905	9.501490358027864	0.004858552564438275	6.845075918550728	6.841497190049736	6.965388798284558	6.883987302295008	0.028789044462618006	6.0	6.0	6.0	6.0	0.0	1	1	1	1	1	1	0	0	0	1	1	1	0	0	1	1	11
1111011111010011	9.576599348975595	9.595160806572519	9.533874036159585	9.568544730569233	0.012830138445381964	6.860390652974537	7.037870220247455	6.298744729788326	6.73233520100344	0.157519983783145	6.0	6.0	6.0	6.0	0.0	1	1	1	1	0	1	1	1	1	1	0	1	0	0	1	1	12
1101110101010001	9.518962607944372	9.559097963553569	9.57609896732131	9.55138651293975	0.011977344889691028	6.0	6.0	6.0	6.0	0.0	6.0	6.0	6.0	6.0	0.0	1	1	0	1	1	1	0	1	0	1	0	1	0	0	0	1	9
1101110011011001	9.584734595942331	9.59283997571398	9.509375316296707	9.562316629317673	0.01879056174252829	7.634289307321397	7.615005051776488	7.644190295684197	7.631161551594027	0.006059177026154728	6.0	6.0	6.0	6.0	0.0	1	1	0	1	1	1	0	0	1	1	0	1	1	0	0	1	10
1101010011011011	9.530039822647852	9.566878532732273	9.49101954253441	9.52931263263818	0.015486785778218116	7.042532818181638	6.9242856974187506	6.717001429858095	6.89460664848616	0.06727221523422654	6.0	6.0	6.0	6.0	0.0	1	1	0	1	0	1	0	0	1	1	0	1	1	0	1	1	10
1100010111001101	9.616690579061867	9.572474320817447	9.505469771061263	9.56487822364686	0.022861148091050297	6.0	6.0	6.0	6.0	0.0	6.0	6.0	6.0	6.0	0.0	1	1	0	0	0	1	0	1	1	1	0	0	1	1	0	1	9
1011100111011110	9.571510860570546	9.564780659890028	9.525740422112843	9.554010647524473	0.010089005021294704	7.162148812672464	7.238286763934572	7.12836245474203	7.176266010449688	0.022986626157671778	6.0	6.0	6.0	6.0	0.0	1	0	1	1	1	0	0	1	1	1	0	1	1	1	1	0	11
1001101111111011	9.591647867332323	9.496955630957672	9.466613353471924	9.518405617253974	0.02662543848828352	6.579988484654952	6.7506315507386345	6.0	6.443540011797862	0.160637049768438	6.0	6.0	6.0	6.0	0.0	1	0	0	1	1	0	1	1	1	1	1	1	1	0	1	1	12
1001011111011110	9.5995125707715	9.58276211176648	9.462331627085344	9.548202103207775	0.03055172791441691	6.0	6.0	6.0	6.0	0.0	6.0	6.0	6.0	6.0	0.0	1	0	0	1	0	1	1	1	1	1	0	1	1	1	1	0	11
1111100101110111	9.405357775657675	9.555272622100876	9.343231771172132	9.434620722976893	0.044502004973562784	6.0	6.0	6.0	6.0	0.0	6.0	6.0	6.0	6.0	0.0	1	1	1	1	1	0	0	1	0	1	1	1	0	1	1	1	12
1111000111000011	9.461775335359233	9.527160721869274	9.528675009168703	9.505870355465737	0.015593007862238651	7.094056388256294	7.155103975941743	6.916017578207728	7.0550593141352556	0.05071350122314283	6.0	6.0	6.0	6.0	0.0	1	1	1	1	0	0	0	1	1	1	0	0	0	0	1	1	9
1101111110100101	9.552275977417988	9.543100305989054	9.47852634032802	9.524634207911687	0.016408838199669845	6.0	6.0	6.0	6.0	0.0	6.0	6.0	6.0	6.0	0.0	1	1	0	1	1	1	1	1	1	0	1	0	0	1	0	1	11
1101101111001101	9.551052342207646	9.543975622058865	9.494483021272368	9.529836995179627	0.01258271032867698	7.050371406102442	7.1033091089067675	6.652513198528403	6.935397904512538	0.10059690001382356	6.0	6.0	6.0	6.0	0.0	1	1	0	1	1	0	1	1	1	1	0	0	1	1	0	1	11
1011101111110011	9.558179203742881	9.532941361740551	9.472532608769253	9.521217724750896	0.017967180987581717	7.157844829298559	7.179259020116548	7.0667451264602645	7.13461632529179	0.024390970375730864	6.0	6.0	6.0	6.0	0.0	1	0	1	1	1	0	1	1	1	1	1	1	0	0	1	1	12
1111111111011111	9.606814266831801	9.628191800513674	9.570631380362816	9.601879149236096	0.011878320807591828	8.39934703284771	8.270462331929808	8.7121685387308	8.46065930116944	0.09273213122276541	7.460134198852137		7.2813759682556665	7.3707550835539015	0.05160305627736661	1	1	1	1	1	1	1	1	1	1	0	1	1	1	1	1	15
1111110111010111	9.561892333423083	9.581849527219887	9.568768230784695	9.570836697142555	0.004138866810815079	8.956914206701972	8.757778136336647	8.906301945323401	8.87366476278734	0.042254551812112635	7.1215233422199935	7.334925017700722	7.3623524875722675	7.272933615830994	0.053823584889444186	1	1	1	1	1	1	0	1	1	1	0	1	0	1	1	1	13
1111011111010111	9.526543139493834	9.485322282736917	9.485682390000866	9.499182604077205	0.009673689342953318	6.635926618297472	7.040140314081151	6.601333382679987	6.75913343835287	0.099601557168675	6.0	6.0	6.0	6.0	0.0	1	1	1	1	0	1	1	1	1	1	0	1	0	1	1	1	13
1101110011110010	9.551774803680937	9.55397614785199	9.546162466731033	9.550637806087986	0.0016448391922303722	7.450409109203854	7.1862283720914375	7.3772471216863	7.337961534327197	0.055685700582117054	6.0	6.0	6.0	6.0	0.0	1	1	0	1	1	1	0	0	1	1	1	1	0	0	1	0	10
1101010110010011	9.403752661401354	9.38600728563544	9.364127622725313	9.384629189920702	0.008103088746157965	6.0	6.0	6.0	6.0	0.0	6.0	6.0	6.0	6.0	0.0	1	1	0	1	0	1	0	1	1	0	0	1	0	0	1	1	9
1011011011111001	9.631183985769924	9.594121308192722	9.478116632131997	9.567807308698216	0.03260041823473369	6.85694977005338	6.454384252978687	6.10819743997555	6.473177154335872	0.15298278378372668	6.0	6.0	6.0	6.0	0.0	1	0	1	1	0	1	1	0	1	1	1	1	1	0	0	1	11
1001000101110101	9.48345380624708	9.463804325045665	9.424020508180142	9.457092879824296	0.012361646684388822	6.0	6.0	6.0	6.0	0.0	6.0	6.0	6.0	6.0	0.0	1	0	0	1	0	0	0	1	0	1	1	1	0	1	0	1	8
1111101001111101	9.462171299853738	9.474834886522462	9.433418931387783	9.456808372587995	0.008664016356677877	6.0	6.0	6.0	6.0	0.0	6.0	6.0	6.0	6.0	0.0	1	1	1	1	1	0	1	0	0	1	1	1	1	1	0	1	12
1111100101011001	9.577537895737622	9.459060702356554	9.46324284754377	9.499947148545983	0.027445751407426455	6.0	6.0	6.0	6.0	0.0	6.0	6.0	6.0	6.0	0.0	1	1	1	1	1	0	0	1	0	1	0	1	1	0	0	1	10
1111011111000101	9.557188453303382	9.536113093675004	9.542345873384553	9.545215806787647	0.0044200317527142525	6.196772989787188	6.150496705756494	6.0	6.1157565651812265	0.042002103921191025	6.0	6.0	6.0	6.0	0.0	1	1	1	1	0	1	1	1	1	1	0	0	0	1	0	1	11
1001101011110001	9.586143748149466	9.44745503334301	9.524660546218037	9.519419775903504	0.028370287152770363	6.8500868557706704	6.668109129508427	6.300798439488242	6.606331474922446	0.11423061470852378	6.0	6.0	6.0	6.0	0.0	1	0	0	1	1	0	1	0	1	1	1	1	0	0	0	1	9
1111010011010010	9.545480482983098	9.513870402732904	9.513690154558665	9.524347013424888	0.007471900405596289	7.271243901127918	7.0840801176135	7.211223292612676	7.1888491037846975	0.03901500503896003	6.0	6.0	6.0	6.0	0.0	1	1	1	1	0	1	0	0	1	1	0	1	0	0	1	0	9
1111000111100101	9.485577283261293	9.540075116379226	9.534145467471141	9.519932622370554	0.01220660461954585	7.374393162118671	7.406661135656506	7.325095975563244	7.368716757779474	0.01676993843124471	6.0	6.0	6.0	6.0	0.0	1	1	1	1	0	0	0	1	1	1	1	0	0	1	0	1	10
1011011101010001	9.51621177206669	9.526269050547146	9.502593851770698	9.515024891461511	0.004850863728146762	6.0	6.0	6.0	6.0	0.0	6.0	6.0	6.0	6.0	0.0	1	0	1	1	0	1	1	1	0	1	0	1	0	0	0	1	9
0101110001111101	9.64356555561699	9.51663644059326	9.376852884582679	9.512351626930975	0.054463568777141445	6.665932460759546	6.42407407998976	6.347452248454842	6.479152929734716	0.06786343047416735	6.0	6.0	6.0	6.0	0.0	0	1	0	1	1	1	0	0	0	1	1	1	1	1	0	1	10
0011011111011011	9.561132313905967	9.526233055756252	9.37498726639226	9.487450878684827	0.040395003037235505	6.0	6.0	6.0	6.0	0.0	6.0	6.0	6.0	6.0	0.0	0	0	1	1	0	1	1	1	1	1	0	1	1	0	1	1	11
1011011010011001	9.412491073550417	9.397942328466145	9.443595610060703	9.418009670692422	0.009521000611803642	6.0	6.0	6.0	6.0	0.0	6.0	6.0	6.0	6.0	0.0	1	0	1	1	0	1	1	0	1	0	0	1	1	0	0	1	9
0100010011111101	9.579710044498713	9.530312916076534	9.39313667784789	9.501053212807712	0.03946412497950978	6.0	6.0	6.0	6.0	0.0	6.0	6.0	6.0	6.0	0.0	0	1	0	0	0	1	0	0	1	1	1	1	1	1	0	1	9
1111010010011111	9.474654128382033	9.398193868734225	9.375876861224592	9.41624161944695	0.0211483967324343	6.0	6.0	6.0	6.0	0.0	6.0	6.0	6.0	6.0	0.0	1	1	1	1	0	1	0	0	1	0	0	1	1	1	1	1	11
1111001011101101	9.530381453136904	9.518403921298644	9.503360720455706	9.517382031630417	0.005527404341516713	7.129714401821184	7.057992620937752	7.139911481345894	7.109206168034944	0.018225968938191315	6.0	6.0	6.0	6.0	0.0	1	1	1	1	0	0	1	0	1	1	1	0	1	1	0	1	11
1101111110010011	9.58009650502358	9.422865033898338	9.405435728644157	9.469465755855358	0.03927534673420522	6.0	6.0	6.0	6.0	0.0	6.0	6.0	6.0	6.0	0.0	1	1	0	1	1	1	1	1	1	0	0	1	0	0	1	1	11
1011101110011011	9.473967031134574	9.354458552050344	9.323322329825167	9.383915971003361	0.03246603650144845	6.0	6.0	6.0	6.0	0.0	6.0	6.0	6.0	6.0	0.0	1	0	1	1	1	0	1	1	1	0	0	1	1	0	1	1	11
1011001011101101	9.614200191673223	9.528194345019124	9.519735750104527	9.55404342893229	0.021338595840182457	6.4070458501812055	6.4911117221103884	6.0156925221805775	6.304616698157392	0.10358141106050654	6.0	6.0	6.0	6.0	0.0	1	0	1	1	0	0	1	0	1	1	1	0	1	1	0	1	10
1111111111011101	9.624681015253923	9.595607888216133	9.588205932988254	9.60283161215277	0.0078713038649514	8.65620045593982	8.596258146957508	8.4780032207142	8.57682060787051	0.037017849534228396	7.734969103654713	6.9274485038160165	7.5484298734908615	7.403615826987196	0.17260296967295402	1	1	1	1	1	1	1	1	1	1	0	1	1	1	0	1	14
1111101111001101	9.517705112054328	9.501372146889167	9.530414357358417	9.516497205433971	0.0059435788326236945	7.363596605116215	7.549491358629807	7.478171357277719	7.463753107007914	0.038286484346310885	6.0	6.0	6.0	6.0	0.0	1	1	1	1	1	0	1	1	1	1	0	0	1	1	0	1	12
1111000011111011	9.484310599108843	9.536607131852014	9.552802699100829	9.524573476687229	0.014613912223156583	7.743782384609428	7.5067197342738305	7.426179566108098	7.5588938949971185	0.06740362856872263	6.0	6.0	6.0	6.0	0.0	1	1	1	1	0	0	0	0	1	1	1	1	1	0	1	1	11
1101110111010010	9.591971970558244	9.582049924377435	9.53965120114928	9.571224365361653	0.011345044982205885	7.3926210903540595	7.379109259509167	7.431500490489899	7.401076946784375	0.011104326498387137	6.0	6.0	6.0	6.0	0.0	1	1	0	1	1	1	0	1	1	1	0	1	0	0	1	0	10
1101110011110111	9.601790344621866	9.595274559290788	9.536910984712199	9.577991962874952	0.014585089073699964	7.741534142325912	7.801796708176659	7.8070202760724445	7.783450375525004	0.01485793485869339	6.0	6.0	6.0	6.0	0.0	1	1	0	1	1	1	0	0	1	1	1	1	0	1	1	1	12
1101100101111101	9.470783100775195	9.523168289907877	9.378784351562855	9.457578580748644	0.029839710467913783	6.0	6.0	6.0	6.0	0.0	6.0	6.0	6.0	6.0	0.0	1	1	0	1	1	0	0	1	0	1	1	1	1	1	0	1	11
0101110001110101	9.564749585075754	9.539323748463612	9.469721701329538	9.524598344956303	0.020084001940437215	6.410024504516586	6.7648470803728875	6.732407162609206	6.63575958249956	0.08008363455383498	6.0	6.0	6.0	6.0	0.0	0	1	0	1	1	1	0	0	0	1	1	1	0	1	0	1	9
0011000111101011	9.47028101624785	9.45126147337363	9.328884688660636	9.416809059427372	0.03132745596605545	6.0	6.415409074874554	6.0	6.138469691624851	0.09791285793674247	6.0	6.0	6.0	6.0	0.0	0	0	1	1	0	0	0	1	1	1	1	0	1	0	1	1	9
1111101011111111	9.573465219401225	9.529471369542797	9.476767104590234	9.526567897844751	0.01976509534054881	8.159491930517747	7.805096332758183	7.852397782559775	7.938995348611901	0.07855296913808556	6.0	6.0	6.0	6.0	0.0	1	1	1	1	1	0	1	0	1	1	1	1	1	1	1	1	14
1111100101100101	9.433161028353819	9.427555366222476	9.414462655787773	9.42505968345469	0.003917452584540491	6.0	6.0	6.0	6.0	0.0	6.0	6.0	6.0	6.0	0.0	1	1	1	1	1	0	0	1	0	1	1	0	0	1	0	1	10
1111011110011011	9.419269006589	9.408680024291659	9.399775759309538	9.409241596730066	0.003983992868911838	6.0	6.0	6.0	6.0	0.0	6.0	6.0	6.0	6.0	0.0	1	1	1	1	0	1	1	1	1	0	0	1	1	0	1	1	12
1111000110111011	9.36627240159093	9.444579229047637	9.416070157748623	9.408973929462396	0.016180014155851363	6.0	6.0	6.0	6.0	0.0	6.0	6.0	6.0	6.0	0.0	1	1	1	1	0	0	0	1	1	0	1	1	1	0	1	1	11
1111000010010111	9.404609474969494	9.399541722743846	9.370514097500594	9.391555098404645	0.007510695900273695	6.0	6.0	6.0	6.0	0.0	6.0	6.0	6.0	6.0	0.0	1	1	1	1	0	0	0	0	1	0	0	1	0	1	1	1	9
1011000010010011	9.39108597263948	9.304461933597944	9.443349855376024	9.379632587204481	0.028638111938465518	6.0	6.0	6.0	6.0	0.0	6.0	6.0	6.0	6.0	0.0	1	0	1	1	0	0	0	0	1	0	0	1	0	0	1	1	7
0111111101110101	9.5671756592245	9.496886405415225	9.459116756849877	9.507726273829867	0.02238790095876615	6.0	6.5078921601124575	6.0455640323868485	6.1844853974997696	0.11471920126955827	6.0	6.0	6.0	6.0	0.0	0	1	1	1	1	1	1	1	0	1	1	1	0	1	0	1	12
0101011101011011	9.587058278906529	9.488575500118491	9.475220938306556	9.516951572443858	0.024935913854584085	6.0	6.0	6.0	6.0	0.0	6.0	6.0	6.0	6.0	0.0	0	1	0	1	0	1	1	1	0	1	0	1	1	0	1	1	10
1101111101100011	9.589498376684807	9.580249012703	9.563674488849275	9.577807292745694	0.005341500928234282	6.0	6.0	6.0	6.0	0.0	6.0	6.0	6.0	6.0	0.0	1	1	0	1	1	1	1	1	0	1	1	0	0	0	1	1	11
1101110111111111	9.573690136229896	9.600900154643188	9.487339678995461	9.553976656622849	0.024205582572337903	7.972051265414072	7.881836611557145	8.130715767128066	7.994867881366428	0.05143872891130066	6.0	6.0	6.0	6.0	0.0	1	1	0	1	1	1	0	1	1	1	1	1	1	1	1	1	14
1101011111001111	9.58154506229562	9.56512686608908	9.567016312113763	9.571229413499488	0.003667468680482	6.0	6.0	6.0	6.0	0.0	6.0	6.0	6.0	6.0	0.0	1	1	0	1	0	1	1	1	1	1	0	0	1	1	1	1	12
1101011011101001	9.60127507470238	9.540918584953758	9.577855459362436	9.573349706339524	0.012422780294157856	6.122697627267263	6.0	6.0689226818595685	6.063873436375611	0.025109088972660815	6.0	6.0	6.0	6.0	0.0	1	1	0	1	0	1	1	0	1	1	1	0	1	0	0	1	10
1100010011101011	9.539405795880173	9.51294513527292	9.544859102108044	9.532403344420379	0.0069689916131318985	6.0	6.0	6.0	6.0	0.0	6.0	6.0	6.0	6.0	0.0	1	1	0	0	0	1	0	0	1	1	1	0	1	0	1	1	9
1100010011010101	9.58841509176994	9.51073275571106	9.458389301952574	9.519179049811191	0.026708866871718046	6.0	6.0	6.0	6.0	0.0	6.0	6.0	6.0	6.0	0.0	1	1	0	0	0	1	0	0	1	1	0	1	0	1	0	1	8
1011101111101111	9.591171734967926	9.525619527815893	9.462337200674195	9.526376154486005	0.02629959971054391	6.8165967628590085	6.831311098654799	6.972631894379824	6.873513251964543	0.03517221174725856	6.0	6.0	6.0	6.0	0.0	1	0	1	1	1	0	1	1	1	1	1	0	1	1	1	1	13
1111101011100011	9.549545995446637	9.488302834402267	9.53449402510894	9.524114284985949	0.013028721141144844	7.3494962987702035	7.312631735466648	7.191424602930884	7.284517545722578	0.03376258038396875	6.0	6.0	6.0	6.0	0.0	1	1	1	1	1	0	1	0	1	1	1	0	0	0	1	1	11
1111010101011101	9.566925630823512	9.540130918982594	9.492470191410805	9.533175580405638	0.015395809308460769	6.0	6.0	6.0	6.0	0.0	6.0	6.0	6.0	6.0	0.0	1	1	1	1	0	1	0	1	0	1	0	1	1	1	0	1	11
1111010011110101	9.598542208961822	9.523600131147884	9.528856499386896	9.550332946498868	0.017078285882871785	8.28548635841844	7.942708956380644	8.070432766590496	8.099542693796527	0.07072202360109217	6.0	6.0	6.0	6.0	0.0	1	1	1	1	0	1	0	0	1	1	1	1	0	1	0	1	11
1101001111111110	9.552214938288452	9.644024254431427	9.462880640188317	9.553039944302732	0.03697693587778035	6.200405269630182	6.0	6.0	6.066801756543394	0.04723597504700675	6.0	6.0	6.0	6.0	0.0	1	1	0	1	0	0	1	1	1	1	1	1	1	1	1	0	12
1001010011111010	9.547821094697973	9.49193696544676	9.514353229361557	9.518037096502097	0.01148141348276591	6.0	6.131345680637527	6.0	6.043781893545842	0.030958473819452718	6.0	6.0	6.0	6.0	0.0	1	0	0	1	0	1	0	0	1	1	1	1	1	0	1	0	9
0111111101010001	9.576802958691063	9.478623022249666	9.458069918224314	9.504498633055015	0.025905418193021765	6.0	6.0	6.0	6.0	0.0	6.0	6.0	6.0	6.0	0.0	0	1	1	1	1	1	1	1	0	1	0	1	0	0	0	1	10
1111111011110011	9.605482880045175	9.604232325886978	9.586776398318575	9.598830534750242	0.004269418876548766	8.523050306406745	8.071731450705931	8.33221063140997	8.308997462840884	0.09248992357191825	7.214474631297247	6.83216625130946	6.6513048283070075	6.899315236971238	0.11738242092733382	1	1	1	1	1	1	1	0	1	1	1	1	0	0	1	1	13
1111100110100011	9.455466752309617	9.459627895479796	9.361878036373296	9.425657561387569	0.022565458989369264	6.0	6.0	6.0	6.0	0.0	6.0	6.0	6.0	6.0	0.0	1	1	1	1	1	0	0	1	1	0	1	0	0	0	1	1	10
1111000111110111	9.555803033115922	9.440922036938137	9.56575926501102	9.52082811168836	0.028324068754560307	7.585752805830762	7.648410023141969	7.725008454245222	7.653057094405985	0.028472882881004826	6.0	6.0	6.0	6.0	0.0	1	1	1	1	0	0	0	1	1	1	1	1	0	1	1	1	12
1111000101011001	9.539026517642732	9.483028276709002	9.487251041447019	9.50310194526625	0.01273046942596737	6.0	6.0	6.0	6.0	0.0	6.0	6.0	6.0	6.0	0.0	1	1	1	1	0	0	0	1	0	1	0	1	1	0	0	1	9
1111000101010011	9.42720960881164	9.52975353035102	9.450909564824167	9.469290901328941	0.021917341345552947	6.0	6.0	6.0	6.0	0.0	6.0	6.0	6.0	6.0	0.0	1	1	1	1	0	0	0	1	0	1	0	1	0	0	1	1	9
1110010011101101	9.466073250970824	9.511279794521013	9.547825633144232	9.50839289287869	0.016718819977179666	6.0	6.0	6.0	6.0	0.0	6.0	6.0	6.0	6.0	0.0	1	1	1	0	0	1	0	0	1	1	1	0	1	1	0	1	10
1101111111011001	9.596390769204746	9.595831767983142	9.521806136384829	9.571342891190906	0.01751425932456886	7.381541513140298	7.201031750028641	7.349731756107392	7.310768339758777	0.03933733278711037	6.0	6.0	6.0	6.0	0.0	1	1	0	1	1	1	1	1	1	1	0	1	1	0	0	1	12
1101010110000011	9.409151543077543	9.409327076699464	9.435175737905707	9.417884785894238	0.006113379713250566	6.0	6.0	6.0	6.0	0.0	6.0	6.0	6.0	6.0	0.0	1	1	0	1	0	1	0	1	1	0	0	0	0	0	1	1	8
1011110001101101	9.58813121320817	9.573960825167124	9.435790422559812	9.532627486978368	0.03435904237657392	6.0	6.0	6.0	6.0	0.0	6.0	6.0	6.0	6.0	0.0	1	0	1	1	1	1	0	0	0	1	1	0	1	1	0	1	10
1111101101110100	9.524094806344609	9.560904248495175	9.539755760841098	9.541584938560293	0.007541476161924813	6.0	6.0	6.0	6.0	0.0	6.0	6.0	6.0	6.0	0.0	1	1	1	1	1	0	1	1	0	1	1	1	0	1	0	0	11
1101110011110011	9.546444653160462	9.559818517653014	9.543019225089099	9.54976079863419	0.003624032589630092	7.531695642886325	7.708421390605395	7.608372645142372	7.616163226211364	0.036178993310484506	6.0	6.0	6.0	6.0	0.0	1	1	0	1	1	1	0	0	1	1	1	1	0	0	1	1	11
1101100101011100	9.645847289881539	9.55387650283628	9.463010256843404	9.554244683187074	0.0373216800937584	6.0	6.0	6.0	6.0	0.0	6.0	6.0	6.0	6.0	0.0	1	1	0	1	1	0	0	1	0	1	0	1	1	1	0	0	9
1011111111010111	9.61133492502107	9.62785789661893	9.579355767151016	9.60618286293034	0.010066627609504695	7.892340463800819	7.709475556910213	8.019083019030386	7.873633013247139	0.06354351747659152	8.150491408870595	7.843230511182933	7.734515786398298	7.909412568817275	0.08807570435647995	1	0	1	1	1	1	1	1	1	1	0	1	0	1	1	1	13
1111110101100111	9.506412215074908	9.611116703804651	9.48135553021172	9.532961483030427	0.02810141830579641	6.266049782724508	6.574223272994168	6.0	6.280091018572892	0.11731791497191585	6.0	6.0	6.0	6.0	0.0	1	1	1	1	1	1	0	1	0	1	1	0	0	1	1	1	12
1111010001011111	9.52707947879277	9.485829569383169	9.390271700709427	9.467726916295122	0.02864981551029875	6.0	6.0	6.0	6.0	0.0	6.0	6.0	6.0	6.0	0.0	1	1	1	1	0	1	0	0	0	1	0	1	1	1	1	1	11
1111000101100011	9.43472072398098	9.507893416110182	9.425387474681669	9.45600053825761	0.01844555260077259	6.0	6.0	6.0	6.0	0.0	6.0	6.0	6.0	6.0	0.0	1	1	1	1	0	0	0	1	0	1	1	0	0	0	1	1	9
1110010011110011	9.511272080770407	9.500457337806397	9.478730889124144	9.496820102566984	0.006765776607059974	6.0	6.0	6.0	6.0	0.0	6.0	6.0	6.0	6.0	0.0	1	1	1	0	0	1	0	0	1	1	1	1	0	0	1	1	10
1101100011111101	9.565369578287909	9.482995795060603	9.568063400583144	9.538809591310551	0.019740816677266605	7.319099872336378	7.3153523846905175	7.318618945300031	7.317690400775642	0.0008324223801951272	6.0	6.0	6.0	6.0	0.0	1	1	0	1	1	0	0	0	1	1	1	1	1	1	0	1	11
1101010011111001	9.531751290829172	9.5135611998271	9.529185361572884	9.52483261740972	0.004019320816970474	7.060161180963857	6.929271428173622	6.963886533034392	6.984439714057291	0.027688315176840225	6.0	6.0	6.0	6.0	0.0	1	1	0	1	0	1	0	0	1	1	1	1	1	0	0	1	10
1011000110010001	9.477233791169684	9.359049327535098	9.349592340899312	9.395291819868033	0.029035104169085984	6.0	6.0	6.0	6.0	0.0	6.0	6.0	6.0	6.0	0.0	1	0	1	1	0	0	0	1	1	0	0	1	0	0	0	1	7
0101110101010111	9.585384511114377	9.5257243092703	9.444877813094982	9.518662211159887	0.028789286112977368	6.0	6.0	6.0	6.0	0.0	6.0	6.0	6.0	6.0	0.0	0	1	0	1	1	1	0	1	0	1	0	1	0	1	1	1	10
1111101111010111	9.581813324942503	9.535977518362333	9.487837994237669	9.53520961251417	0.019184555223818667	7.535257804875822	7.72732841262749	7.768635238604682	7.677073818702664	0.050843550560156325	6.0	6.0	6.0	6.0	0.0	1	1	1	1	1	0	1	1	1	1	0	1	0	1	1	1	13
1111010111111011	9.538565036030096	9.544183763497333	9.500065428557454	9.527604742694962	0.00980393536597257	8.277388332285371	8.08894688619161	8.092701446378662	8.153012221618548	0.043980273720165185	6.0	6.0	6.0	6.0	0.0	1	1	1	1	0	1	0	1	1	1	1	1	1	0	1	1	13
1101111001111011	9.608159165644746	9.634522124901023	9.551159216035144	9.59794683552697	0.017395221606670477	6.0	6.0	6.0	6.0	0.0	6.0	6.0	6.0	6.0	0.0	1	1	0	1	1	1	1	0	0	1	1	1	1	0	1	1	12
1101100001111111	9.529372910894354	9.459427487042584	9.425447108644411	9.471415835527116	0.02163305136384108	6.0	6.0	6.0	6.0	0.0	6.0	6.0	6.0	6.0	0.0	1	1	0	1	1	0	0	0	0	1	1	1	1	1	1	1	11
1011011111011011	9.642508559325119	9.527855811568552	9.523278242847462	9.564547537913711	0.02757921674764525	6.0	6.0	6.0	6.0	0.0	6.0	6.0	6.0	6.0	0.0	1	0	1	1	0	1	1	1	1	1	0	1	1	0	1	1	12
1011000110010011	9.456041849630648	9.381387473853449	9.404777509695425	9.414068944393174	0.015588815567192668	6.0	6.0	6.0	6.0	0.0	6.0	6.0	6.0	6.0	0.0	1	0	1	1	0	0	0	1	1	0	0	1	0	0	1	1	8
0101010101011000	9.64222139335866	9.483078904671613	9.513730329088157	9.54634354237281	0.03447051683912759	6.0	6.0	6.0	6.0	0.0	6.0	6.0	6.0	6.0	0.0	0	1	0	1	0	1	0	1	0	1	0	1	1	0	0	0	7
1111111001111010	9.640540587030106	9.600788662571297	9.575280716236184	9.605536655279195	0.013426468014556981	6.0	6.001428484694777	6.0	6.000476161564926	0.00033669707149943404	6.0	6.0	6.0	6.0	0.0	1	1	1	1	1	1	1	0	0	1	1	1	1	0	1	0	12
1111110101011000	9.63227878954833	9.602894316844813	9.500135021731909	9.578436042708349	0.02832592812095427	6.0	6.349070238912343	6.0	6.116356746304114	0.0822766443484419	6.0	6.0	6.0	6.0	0.0	1	1	1	1	1	1	0	1	0	1	0	1	1	0	0	0	10
1111101110010101	9.368702265519449	9.366171500308235	9.3679251190457	9.36759962829113	0.0005292528242809034	6.0	6.0	6.0	6.0	0.0	6.0	6.0	6.0	6.0	0.0	1	1	1	1	1	0	1	1	1	0	0	1	0	1	0	1	11
1111010101110011	9.529045522782962	9.538655235610689	9.445362541057992	9.504354433150548	0.020948823135809643	6.0	6.0960738773809995	6.0	6.0320246257936665	0.022644830063663197	6.0	6.0	6.0	6.0	0.0	1	1	1	1	0	1	0	1	0	1	1	1	0	0	1	1	11
1111001111100111	9.68581547654916	9.549570056005203	9.490374420989534	9.575253317847967	0.04091459398089355	7.145636304915833	7.1156859732616935	7.14067816538872	7.134000147855416	0.0065536571238199405	6.0	6.0	6.0	6.0	0.0	1	1	1	1	0	0	1	1	1	1	1	0	0	1	1	1	12
1111001111000101	9.531111907302332	9.507358797835721	9.571730377590557	9.53673369424287	0.013289271589875883	7.01864256323589	7.012274179750593	6.857685118747902	6.962867287244795	0.03721022597874473	6.0	6.0	6.0	6.0	0.0	1	1	1	1	0	0	1	1	1	1	0	0	0	1	0	1	10
1101110101011101	9.537923566318913	9.552016193577566	9.48608931212058	9.525343024005688	0.014173278604073074	6.0	6.0	6.0	6.0	0.0	6.0	6.0	6.0	6.0	0.0	1	1	0	1	1	1	0	1	0	1	0	1	1	1	0	1	11
1101100101110010	9.508812364324474	9.535195624801931	9.44153717154122	9.495181720222542	0.01971599313067233	6.0	6.0	6.0	6.0	0.0	6.0	6.0	6.0	6.0	0.0	1	1	0	1	1	0	0	1	0	1	1	1	0	0	1	0	9
1101000111101101	9.56565525086766	9.547299556716316	9.570638318343995	9.561197708642657	0.005017913088694831	7.102266075931049	7.013515569634353	7.094395015922536	7.070058887162646	0.020055541479615344	6.0	6.0	6.0	6.0	0.0	1	1	0	1	0	0	0	1	1	1	1	0	1	1	0	1	10
1011011111100101	9.671482848172907	9.485087109189068	9.535331610654843	9.563967189338939	0.03937181765502373	6.0	6.0	6.0	6.0	0.0	6.0	6.0	6.0	6.0	0.0	1	0	1	1	0	1	1	1	1	1	1	0	0	1	0	1	11
1000010111011101	9.57983901306752	9.543661308833704	9.521609799761569	9.548370040554266	0.0120020098064842	6.0	6.0	6.0	6.0	0.0	6.0	6.0	6.0	6.0	0.0	1	0	0	0	0	1	0	1	1	1	0	1	1	1	0	1	9
0101010001001110	9.625401833100264	9.487738124866144	9.49023753878878	9.534459165585064	0.03215713593324339	6.0	6.0	6.0	6.0	0.0	6.0	6.0	6.0	6.0	0.0	0	1	0	1	0	1	0	0	0	1	0	0	1	1	1	0	7
1111110001101000	9.562034118699994	9.646192392611564	9.61994280970745	9.609389773673003	0.017579242940192925	6.273590228600518	6.069715632760193	6.109975807079952	6.151093889480221	0.04408180885669735	6.0	6.0	6.0	6.0	0.0	1	1	1	1	1	1	0	0	0	1	1	0	1	0	0	0	9
1111101101111100	9.633614180899162	9.551359359210176	9.50504553107759	9.563339690395644	0.026583581025138452	6.0	6.0	6.0	6.0	0.0	6.0	6.0	6.0	6.0	0.0	1	1	1	1	1	0	1	1	0	1	1	1	1	1	0	0	12
1101111010110011	9.515295960227869	9.468391256339686	9.454415269870946	9.479367495479499	0.013019043640149303	6.0	6.0	6.0	6.0	0.0	6.0	6.0	6.0	6.0	0.0	1	1	0	1	1	1	1	0	1	0	1	1	0	0	1	1	11
1101110111001111	9.652529002547265	9.642933057762411	9.48227334728468	9.592578469198118	0.039047909631059606	8.00920431593653	8.100141676342924	7.98028955581971	8.029878516033055	0.025533310304714583	6.0	6.0	6.0	6.0	0.0	1	1	0	1	1	1	0	1	1	1	0	0	1	1	1	1	12
1001011011010100	9.581062264985128	9.559327059116884	9.52170615032901	9.55403182481034	0.01225980367256117	6.0	6.0	6.0	6.0	0.0	6.0	6.0	6.0	6.0	0.0	1	0	0	1	0	1	1	0	1	1	0	1	0	1	0	0	8
0101010101111101	9.602144599499034	9.455998641344998	9.42651135191036	9.494884864251464	0.03839675151968087	6.0	6.0	6.0	6.0	0.0	6.0	6.0	6.0	6.0	0.0	0	1	0	1	0	1	0	1	0	1	1	1	1	1	0	1	10
1111110011110011	9.58423626282077	9.564049775200859	9.594924064273725	9.581070034098452	0.006400835683464182	8.861727428646514	8.842135960441595	8.732994187318011	8.81228585880204	0.028317642562115598	6.966949156418202	6.85508926712826	7.359071169303089	7.060369864283184	0.10804706607418467	1	1	1	1	1	1	0	0	1	1	1	1	0	0	1	1	12
1111101111100011	9.536290561189368	9.533889947356418	9.544178184486318	9.538119564344035	0.002197380835415277	7.515422609819268	7.288971443662369	7.355059825385046	7.386484626288895	0.04754063393095028	6.0	6.0	6.0	6.0	0.0	1	1	1	1	1	0	1	1	1	1	1	0	0	0	1	1	12
1101111111011111	9.599919562669179	9.600223181811467	9.51336993317698	9.571170892552542	0.020435819144732942	7.2924199204017475	7.258061972770323	7.516956509181777	7.355812800784616	0.05740294447783576	6.0	6.0	6.0	6.0	0.0	1	1	0	1	1	1	1	1	1	1	0	1	1	1	1	1	14
1101111001000111	9.646082727914246	9.57508395721069	9.563853937713992	9.595006874279642	0.018202955130287784	6.0	6.0	6.0	6.0	0.0	6.0	6.0	6.0	6.0	0.0	1	1	0	1	1	1	1	0	0	1	0	0	0	1	1	1	10
1101000011111001	9.561476547508466	9.547301512744674	9.634136736732676	9.580971598995271	0.019018113320448598	6.9908994241123645	6.630367014969057	6.620960046993572	6.747408828691664	0.08610833806448735	6.0	6.0	6.0	6.0	0.0	1	1	0	1	0	0	0	0	1	1	1	1	1	0	0	1	9
1011101011001111	9.52329489268517	9.493087539170805	9.459436885491787	9.491939772449253	0.01304127611990021	6.7859808981683925	6.971042163528526	6.907150816456674	6.88805795938453	0.038373864538155784	6.0	6.0	6.0	6.0	0.0	1	0	1	1	1	0	1	0	1	1	0	0	1	1	1	1	11
1001011011001011	9.571098426970039	9.492999990397657	9.508646913044453	9.524248443470716	0.016869090384950724	6.0	6.0	6.0	6.0	0.0	6.0	6.0	6.0	6.0	0.0	1	0	0	1	0	1	1	0	1	1	0	0	1	0	1	1	9
1111101011001111	9.53693570328573	9.514382330372168	9.522276893139628	9.524531642265842	0.004672197514039235	7.577683791302631	7.557006029445293	7.4877140202834775	7.5408012803438	0.01923791977835901	6.0	6.0	6.0	6.0	0.0	1	1	1	1	1	0	1	0	1	1	0	0	1	1	1	1	12
1111000110011111	9.400783540187154	9.369069724440768	9.42247519827094	9.397442820966289	0.010965145252425815	6.0	6.0	6.0	6.0	0.0	6.0	6.0	6.0	6.0	0.0	1	1	1	1	0	0	0	1	1	0	0	1	1	1	1	1	11
1110101011011101	9.622392536694198	9.476023381914665	9.513816191078227	9.53741070322903	0.031020176553453394	6.0	6.0	6.0	6.0	0.0	6.0	6.0	6.0	6.0	0.0	1	1	1	0	1	0	1	0	1	1	0	1	1	1	0	1	11
1101110111101111	9.608143512945317	9.593015958802113	9.431537517192163	9.544232329646531	0.039963110675519005	7.935962196660607	7.9900249450578515	8.12111127953835	8.015699473752269	0.038868221360510324	6.0	6.0	6.0	6.0	0.0	1	1	0	1	1	1	0	1	1	1	1	0	1	1	1	1	13
1101000110111001	9.355649678612187	9.412086530283394	9.407052793260744	9.391596334052108	0.012750530414396173	6.0	6.0	6.0	6.0	0.0	6.0	6.0	6.0	6.0	0.0	1	1	0	1	0	0	0	1	1	0	1	1	1	0	0	1	9
1011111001111011	9.610232507906378	9.624526652315065	9.467255766389448	9.567338308870298	0.035504617359735466	6.0	6.0	6.0	6.0	0.0	6.0	6.0	6.0	6.0	0.0	1	0	1	1	1	1	1	0	0	1	1	1	1	0	1	1	12
1001110111111010	9.593857632054323	9.556423759150878	9.44729020699295	9.53252386606605	0.031088331651870058	6.8857222628328	7.03946608595086	7.055476945651738	6.993555098145133	0.03826449003474096	6.0	6.0	6.0	6.0	0.0	1	0	0	1	1	1	0	1	1	1	1	1	1	0	1	0	11
0001110011011101	9.600476126198574	9.489439622463859	9.463196253033187	9.517704000565208	0.02975062239171956	7.1427818318239344	7.3409336846627715	7.462200288999117	7.315305268495275	0.0658276151303341	6.0	6.0	6.0	6.0	0.0	0	0	0	1	1	1	0	0	1	1	0	1	1	1	0	1	9
1111000011011000	9.520347011041038	9.51951990838307	9.539260116741564	9.526375678721891	0.004558464325000446	7.10423737002941	7.336645017355468	7.225456133951488	7.222112840445455	0.047454736051857765	6.0	6.0	6.0	6.0	0.0	1	1	1	1	0	0	0	0	1	1	0	1	1	0	0	0	8
1110010111001101	9.51469118367866	9.541032407696909	9.470446934672573	9.508723508682714	0.014561862914019832	6.0	6.0	6.0	6.0	0.0	6.0	6.0	6.0	6.0	0.0	1	1	1	0	0	1	0	1	1	1	0	0	1	1	0	1	10
1101111010101101	9.497165825002943	9.605453402540821	9.510282812538087	9.537634013360616	0.02412680391211282	6.0	6.0	6.0	6.0	0.0	6.0	6.0	6.0	6.0	0.0	1	1	0	1	1	1	1	0	1	0	1	0	1	1	0	1	11
1101111001001110	9.56572137833012	9.647112919191096	9.599167138721446	9.604000478747553	0.01670162972480538	6.0	6.0	6.0	6.0	0.0	6.0	6.0	6.0	6.0	0.0	1	1	0	1	1	1	1	0	0	1	0	0	1	1	1	0	10
1011011101011011	9.550862282633963	9.534052779089526	9.461111363948897	9.515342141890796	0.019478076605465286	6.0	6.0	6.0	6.0	0.0	6.0	6.0	6.0	6.0	0.0	1	0	1	1	0	1	1	1	0	1	0	1	1	0	1	1	11
0001011001101101	9.540470840091418	9.376366002189286	9.375209999106033	9.430682280462245	0.03881683473886968	6.0	6.0	6.0	6.0	0.0	6.0	6.0	6.0	6.0	0.0	0	0	0	1	0	1	1	0	0	1	1	0	1	1	0	1	8
1111111101110101	9.624139036672302	9.59543440580651	9.511630005441962	9.57706781597359	0.023866186832928203	6.18568972364104	6.615475067503167	6.305840542008622	6.369001777717609	0.0905270371416612	6.0	6.0	6.0	6.0	0.0	1	1	1	1	1	1	1	1	0	1	1	1	0	1	0	1	13
1111101110011111	9.339653381861329	9.372115682465731	9.372577791424376	9.361448951917145	0.007706475001753698	6.0	6.0	6.0	6.0	0.0	6.0	6.0	6.0	6.0	0.0	1	1	1	1	1	0	1	1	1	0	0	1	1	1	1	1	13
1011101011010011	9.531169526662476	9.535236436188164	9.39980947780627	9.48873848021897	0.031452107880768465	7.120996469808916	7.111328036117568	7.1987616512810275	7.143695385735838	0.019568639253199075	6.0	6.0	6.0	6.0	0.0	1	0	1	1	1	0	1	0	1	1	0	1	0	0	1	1	10
1101011011101011	9.612488117456596	9.526789130691988	9.557371577783778	9.56554960864412	0.01773057258280489	6.0	6.0	6.0	6.0	0.0	6.0	6.0	6.0	6.0	0.0	1	1	0	1	0	1	1	0	1	1	1	0	1	0	1	1	11
1011111011100000	9.639049993517686	9.559835604354689	9.550278465212722	9.583054687695032	0.019893216736591855	6.878802962165443	6.9856190662981605	7.090499363052058	6.984973797171887	0.043212949093743167	6.0	6.0	6.0	6.0	0.0	1	0	1	1	1	1	1	0	1	1	1	0	0	0	0	0	9
1011011001010011	9.541578205501873	9.531370099276147	9.434891376318733	9.502613227032251	0.024033789256748987	6.0	6.0	6.0	6.0	0.0	6.0	6.0	6.0	6.0	0.0	1	0	1	1	0	1	1	0	0	1	0	1	0	0	1	1	9
0101101111111101	9.54507060008666	9.423763678221778	9.391704479760238	9.453512919356227	0.03302538096437168	6.816800289695657	7.006675029385166	7.189920021904031	7.004465113661619	0.07616675394208099	6.0	6.0	6.0	6.0	0.0	0	1	0	1	1	0	1	1	1	1	1	1	1	1	0	1	12
1111110100011111	9.460569161120944	9.508786876260881	9.366029346153702	9.44512846117851	0.029647201980427987	6.0	6.0	6.0	6.0	0.0	6.0	6.0	6.0	6.0	0.0	1	1	1	1	1	1	0	1	0	0	0	1	1	1	1	1	12
1111100101010111	9.521050091078953	9.571075613034562	9.485474547936198	9.525866750683237	0.0175560328842693	6.0	6.0	6.0	6.0	0.0	6.0	6.0	6.0	6.0	0.0	1	1	1	1	1	0	0	1	0	1	0	1	0	1	1	1	11
1111000001111011	9.458231218050788	9.448254200075821	9.417242744598738	9.441242720908448	0.0087262474663914	6.0	6.0	6.0	6.0	0.0	6.0	6.0	6.0	6.0	0.0	1	1	1	1	0	0	0	0	0	1	1	1	1	0	1	1	10
1101101111010011	9.573445140672767	9.53405759774795	9.467101812796802	9.524868183739173	0.021949031274380096	7.263717706305027	6.9992311153657045	6.695570695486535	6.986173172385755	0.11606437788403433	6.0	6.0	6.0	6.0	0.0	1	1	0	1	1	0	1	1	1	1	0	1	0	0	1	1	11
1101000111110010	9.692814989404614	9.547652180195524	9.561384732748396	9.600617300782844	0.032717110941885584	6.798698323590161	6.498245869590767	6.707715003214322	6.66821973213175	0.0628991608409561	6.0	6.0	6.0	6.0	0.0	1	1	0	1	0	0	0	1	1	1	1	1	0	0	1	0	9
1101000111101001	9.5816067190977	9.487607093754988	9.482637941737586	9.517283918196759	0.02276415367322651	6.873395392308023	6.653655474757676	6.732719620596191	6.753256829220629	0.045438127427710376	6.0	6.0	6.0	6.0	0.0	1	1	0	1	0	0	0	1	1	1	1	0	1	0	0	1	9
1001110111001001	9.595720057789267	9.539580320725443	9.599993621988844	9.578431333501184	0.013763579555101114	7.577700119636316	7.3629496451733445	7.7099761583064135	7.550208641038691	0.07150021707535435	6.0	6.0	6.0	6.0	0.0	1	0	0	1	1	1	0	1	1	1	0	0	1	0	0	1	9
0111011001110011	9.461881518378137	9.457032115923136	9.411732285446107	9.443548639915793	0.011292250180604693	6.0	6.0	6.0	6.0	0.0	6.0	6.0	6.0	6.0	0.0	0	1	1	1	0	1	1	0	0	1	1	1	0	0	1	1	10
0101101101110011	9.560221969290504	9.437824226122883	9.373429031363504	9.45715840892563	0.03873684375229351	6.0	6.0	6.0	6.0	0.0	6.0	6.0	6.0	6.0	0.0	0	1	0	1	1	0	1	1	0	1	1	1	0	0	1	1	10
0101010001100101	9.550310391687377	9.4463452523795	9.472100336362985	9.489585326809953	0.02210385040373644	6.0	6.0	6.0	6.0	0.0	6.0	6.0	6.0	6.0	0.0	0	1	0	1	0	1	0	0	0	1	1	0	0	1	0	1	7
0011011111111111	9.571897685240026	9.473027328423797	9.480471876273096	9.508465629978973	0.022478043172360854	6.0	6.103216725847108	6.0	6.03440557528237	0.024328415592787714	6.0	6.0	6.0	6.0	0.0	0	0	1	1	0	1	1	1	1	1	1	1	1	1	1	1	13
1111000011011010	9.52495529348182	9.424291824361573	9.450549353166505	9.466598823669965	0.02131694408763392	7.3561725468827746	7.010575121800648	7.4033978878551014	7.256715185512841	0.08755594062338097	6.0	6.0	6.0	6.0	0.0	1	1	1	1	0	0	0	0	1	1	0	1	1	0	1	0	9
1101110001110011	9.562828244645244	9.64057430042949	9.522151920385314	9.575184821820017	0.024564468830131136	6.0	6.0	6.0	6.0	0.0	6.0	6.0	6.0	6.0	0.0	1	1	0	1	1	1	0	0	0	1	1	1	0	0	1	1	10
1101011011110111	9.566989418825251	9.565268372617876	9.506496270479662	9.546251353974263	0.014059934197089988	6.0	6.0	6.0	6.0	0.0	6.0	6.0	6.0	6.0	0.0	1	1	0	1	0	1	1	0	1	1	1	1	0	1	1	1	12
1011000010001101	9.465808363129684	9.373902031628287	9.371981330459425	9.403897241739132	0.02189239779437049	6.0	6.0	6.0	6.0	0.0	6.0	6.0	6.0	6.0	0.0	1	0	1	1	0	0	0	0	1	0	0	0	1	1	0	1	7
1001111101011001	9.611931889392194	9.54225701563442	9.498655036829351	9.550947980618655	0.02332581183261687	6.0	6.0	6.0	6.0	0.0	6.0	6.0	6.0	6.0	0.0	1	0	0	1	1	1	1	1	0	1	0	1	1	0	0	1	10
1101111101011101	9.595436043411429	9.577809143398257	9.527239049342755	9.56682807871748	0.014451904927166807	6.0	6.0	6.0	6.0	0.0	6.0	6.0	6.0	6.0	0.0	1	1	0	1	1	1	1	1	0	1	0	1	1	1	0	1	12
1101110111110111	9.589130876282177	9.575664226114698	9.567325438520896	9.577373513639257	0.004491854236123341	7.806948768359119	7.77488286860898	8.107225669801535	7.896352435589878	0.07484171760217215	6.0	6.0	6.0	6.0	0.0	1	1	0	1	1	1	0	1	1	1	1	1	0	1	1	1	13
1101110001001001	9.623491308625619	9.603764357482142	9.549694295041355	9.592316653716372	0.01559800865826896	6.0	6.0	6.0	6.0	0.0	6.0	6.0	6.0	6.0	0.0	1	1	0	1	1	1	0	0	0	1	0	0	1	0	0	1	8
1101101011011011	9.492355509925323	9.542293481251725	9.472919153624726	9.502522714933926	0.01461008998768635	7.0353181316345035	6.9655364598913465	6.557414868056887	6.852756486527579	0.10538609500979655	6.0	6.0	6.0	6.0	0.0	1	1	0	1	1	0	1	0	1	1	0	1	1	0	1	1	11
1101010111100011	9.581975502204477	9.554452952845963	9.520961144366199	9.552463199805546	0.012474355718003722	7.021960711255916	7.011397889312779	7.1550731113409505	7.062810570636548	0.0326909151874905	6.0	6.0	6.0	6.0	0.0	1	1	0	1	0	1	0	1	1	1	1	0	0	0	1	1	10
1101010101010111	9.521000688216946	9.520590527765755	9.48040744840912	9.507332888130605	0.009519948669727848	6.0	6.0	6.0	6.0	0.0	6.0	6.0	6.0	6.0	0.0	1	1	0	1	0	1	0	1	0	1	0	1	0	1	1	1	10
0101000101100101	9.52725648346344	9.453528478778836	9.457492389045008	9.479425783762428	0.016930052281696403	6.0	6.0	6.0	6.0	0.0	6.0	6.0	6.0	6.0	0.0	0	1	0	1	0	0	0	1	0	1	1	0	0	1	0	1	7
1111111001110000	9.593588134017338	9.603387556625753	9.634234894521038	9.610403528388042	0.008659846800879507	6.0	6.0	6.0	6.0	0.0	6.0	6.0	6.0	6.0	0.0	1	1	1	1	1	1	1	0	0	1	1	1	0	0	0	0	10
1111101101110111	9.493228876008537	9.457794836815996	9.483319522139103	9.478114411654545	0.007463384673881517	6.0	6.0	6.0	6.0	0.0	6.0	6.0	6.0	6.0	0.0	1	1	1	1	1	0	1	1	0	1	1	1	0	1	1	1	13
1111010101011010	9.56812309410074	9.587373882276438	9.441556087629499	9.53235102133556	0.032340475675130625	6.0	6.0	6.0	6.0	0.0	6.0	6.0	6.0	6.0	0.0	1	1	1	1	0	1	0	1	0	1	0	1	1	0	1	0	10
1111000101010010	9.497996980900279	9.563384288397446	9.534675297309708	9.532018855535812	0.013380131461772193	6.0	6.0	6.0	6.0	0.0	6.0	6.0	6.0	6.0	0.0	1	1	1	1	0	0	0	1	0	1	0	1	0	0	1	0	8
1101111111100101	9.604543118790524	9.649123692711195	9.575160510241984	9.6096091072479	0.015203542731499221	7.808203471995635	7.501557272182832	7.585123703609236	7.631628149262568	0.06471729619925315	6.0	6.0	6.0	6.0	0.0	1	1	0	1	1	1	1	1	1	1	1	0	0	1	0	1	12
1101011111111001	9.646619279827712	9.577130033312656	9.64376476643856	9.622504693192974	0.016052943038132976	6.0	6.0	6.0	6.0	0.0	6.0	6.0	6.0	6.0	0.0	1	1	0	1	0	1	1	1	1	1	1	1	1	0	0	1	12
1011010010011111	9.464488431653963	9.353366937321516	9.284372065334075	9.367409144769852	0.03709978447059274	6.0	6.0	6.0	6.0	0.0	6.0	6.0	6.0	6.0	0.0	1	0	1	1	0	1	0	0	1	0	0	1	1	1	1	1	10
1001000111010111	9.582359994096183	9.484272117363526	9.445559078534183	9.504063729997965	0.028787739209178785	6.0	6.089158276979295	6.0	6.029719425659764	0.021014807416989294	6.0	6.0	6.0	6.0	0.0	1	0	0	1	0	0	0	1	1	1	0	1	0	1	1	1	9
1001000111010001	9.579453563794166	9.539218182658603	9.485379528572828	9.534683758341865	0.019269586479819873	6.0	6.0	6.0	6.0	0.0	6.0	6.0	6.0	6.0	0.0	1	0	0	1	0	0	0	1	1	1	0	1	0	0	0	1	7
1001000011110010	9.587935951247411	9.448783110941813	9.484355445344896	9.507024835844707	0.02951356803941632	6.0	6.0	6.0	6.0	0.0	6.0	6.0	6.0	6.0	0.0	1	0	0	1	0	0	0	0	1	1	1	1	0	0	1	0	7
0001010011011001	9.555604802713834	9.456758051662769	9.401396807717576	9.47125322069806	0.031892028455955033	6.410564336832429	6.641380460755682	6.0	6.350648265862705	0.13262395178984435	6.0	6.0	6.0	6.0	0.0	0	0	0	1	0	1	0	0	1	1	0	1	1	0	0	1	7
1111110011111011	9.527940407279877	9.561144448076872	9.530650127455814	9.539911660937522	0.007527273556172428	8.648327103409745	8.611917458426149	8.714149310431004	8.658131290755632	0.02115391791221597	7.241027535148675	7.134082355185764	7.1577377644668365	7.177615884933759	0.022933500366268914	1	1	1	1	1	1	0	0	1	1	1	1	1	0	1	1	13
1111101101110011	9.499265224754463	9.531750916461716	9.478910723174193	9.503308954796791	0.01088029810526888	6.0	6.0	6.0	6.0	0.0	6.0	6.0	6.0	6.0	0.0	1	1	1	1	1	0	1	1	0	1	1	1	0	0	1	1	12
1111101001101100	9.491196137333628	9.504958396120694	9.4961019644349	9.49741883262974	0.002847529575862888	6.0	6.0	6.0	6.0	0.0	6.0	6.0	6.0	6.0	0.0	1	1	1	1	1	0	1	0	0	1	1	0	1	1	0	0	10
1111010111000111	9.535212256310198	9.573592509764511	9.486275297078226	9.531693354384311	0.01786691966968794	7.216674409750007	6.9121847278479445	7.232113442212175	7.120324193270043	0.07365586504197456	6.0	6.0	6.0	6.0	0.0	1	1	1	1	0	1	0	1	1	1	0	0	0	1	1	1	11
1111010011001111	9.522170045519678	9.501877643217416	9.524205112297446	9.516084267011513	0.00503994864255842	7.458262010943518	7.2180052617800845	7.198995628288449	7.29175430033735	0.058997111242630546	6.0	6.0	6.0	6.0	0.0	1	1	1	1	0	1	0	0	1	1	0	0	1	1	1	1	11
1111010011000011	9.541489013042874	9.544399220891405	9.534611049138382	9.540166427690886	0.0020519909265814653	6.879635651358001	6.950814389477402	7.189220465501631	7.006556835445678	0.0661955493204051	6.0	6.0	6.0	6.0	0.0	1	1	1	1	0	1	0	0	1	1	0	0	0	0	1	1	9
1101101110100010	9.48341045855516	9.490502080692997	9.440583012464359	9.471498517237505	0.011025720707133575	6.0	6.0	6.0	6.0	0.0	6.0	6.0	6.0	6.0	0.0	1	1	0	1	1	0	1	1	1	0	1	0	0	0	1	0	9
1101000111101011	9.573890403941807	9.554455078028745	9.540363022831762	9.556236168267437	0.006872657574928273	6.767511729291296	6.820551841786536	6.861306521476874	6.816456697518235	0.019200448845524444	6.0	6.0	6.0	6.0	0.0	1	1	0	1	0	0	0	1	1	1	1	0	1	0	1	1	10
1011010111100101	9.61040023510487	9.517567767119058	9.541379057085418	9.556449019769781	0.019684150178782837	6.833919553550029	7.061294086186731	7.155303105753091	7.016838915163284	0.06745868313235334	6.0	6.0	6.0	6.0	0.0	1	0	1	1	0	1	0	1	1	1	1	0	0	1	0	1	10
1000010011011101	9.486896787607245	9.50281682120881	9.396838223643119	9.462183944153058	0.023330628149820065	6.0	6.0	6.0	6.0	0.0	6.0	6.0	6.0	6.0	0.0	1	0	0	0	0	1	0	0	1	1	0	1	1	1	0	1	8
0111110101010010	9.655801059166313	9.596069102581296	9.516581151231103	9.589483770992905	0.02851336129919012	6.253272249888426	6.312893464076222	6.0	6.188721904654883	0.06782408651274723	6.0	6.0	6.0	6.0	0.0	0	1	1	1	1	1	0	1	0	1	0	1	0	0	1	0	9
0011010001001101	9.518470827275213	9.434001850475283	9.34525081391692	9.432574497222472	0.03536198820754432	6.0	6.0	6.0	6.0	0.0	6.0	6.0	6.0	6.0	0.0	0	0	1	1	0	1	0	0	0	1	0	0	1	1	0	1	7
1111000001111111	9.516850131066043	9.494285637581212	9.41648346010871	9.475873076251988	0.021496643035565786	6.0	6.0	6.0	6.0	0.0	6.0	6.0	6.0	6.0	0.0	1	1	1	1	0	0	0	0	0	1	1	1	1	1	1	1	11
1101110111100101	9.568105503929727	9.574055014323466	9.548712619550935	9.563624379268042	0.005410169465566255	8.098226168930086	7.797610666819643	7.8612758412591335	7.9190375590029545	0.06467190535672623	6.0	6.0	6.0	6.0	0.0	1	1	0	1	1	1	0	1	1	1	1	0	0	1	0	1	11
1101101111010000	9.540163558531411	9.530384138641184	9.557239678093204	9.542595791755266	0.005548901072227009	6.801383311289399	7.065167946254838	6.791558053635103	6.88603643705978	0.06336430003278352	6.0	6.0	6.0	6.0	0.0	1	1	0	1	1	0	1	1	1	1	0	1	0	0	0	0	9
1101100001111001	9.515493914214412	9.353578823238463	9.43390543289373	9.434326056782202	0.03305111411329208	6.0	6.0	6.0	6.0	0.0	6.0	6.0	6.0	6.0	0.0	1	1	0	1	1	0	0	0	0	1	1	1	1	0	0	1	9
1001111101111011	9.617596331369231	9.614739399029537	9.472623042940114	9.56831959111296	0.033838864526721496	6.0	6.0	6.0	6.0	0.0	6.0	6.0	6.0	6.0	0.0	1	0	0	1	1	1	1	1	0	1	1	1	1	0	1	1	12
1001011011000101	9.642654544458491	9.568578750841967	9.61900512654552	9.61007947394866	0.015446446493661888	6.0	6.0	6.0	6.0	0.0	6.0	6.0	6.0	6.0	0.0	1	0	0	1	0	1	1	0	1	1	0	0	0	1	0	1	8
1111101110010000	9.417557124633051	9.390108609744107	9.415710864231349	9.40779219953617	0.006263441284125851	6.0	6.0	6.0	6.0	0.0	6.0	6.0	6.0	6.0	0.0	1	1	1	1	1	0	1	1	1	0	0	1	0	0	0	0	9
1111011111100111	9.602497638778333	9.604083523802732	9.529642958268257	9.57874137361644	0.017361929376774995	6.906733119381883	6.565825397736184	6.0	6.490852839039356	0.1869745530208866	6.0	6.0	6.0	6.0	0.0	1	1	1	1	0	1	1	1	1	1	1	0	0	1	1	1	13
1111011011001111	9.576871573593976	9.491138485245008	9.4893577235523	9.51912259413043	0.02042058295716409	6.093304749584602	6.121323680609595	6.0	6.071542810064732	0.0259327507793864	6.0	6.0	6.0	6.0	0.0	1	1	1	1	0	1	1	0	1	1	0	0	1	1	1	1	12
1111000101110110	9.514804695029367	9.43319963411745	9.490506714182217	9.479503681109678	0.017105781401843653	6.0	6.0	6.0	6.0	0.0	6.0	6.0	6.0	6.0	0.0	1	1	1	1	0	0	0	1	0	1	1	1	0	1	1	0	10
1110010011000101	9.553072798597851	9.45033913702045	9.41100369254078	9.471471876053029	0.029946764483630317	6.0	6.0	6.0	6.0	0.0	6.0	6.0	6.0	6.0	0.0	1	1	1	0	0	1	0	0	1	1	0	0	0	1	0	1	8
1101110001111101	9.5555950623775	9.610895114424853	9.528591030419001	9.565027069073786	0.017128011286338517	6.055519412999174	6.168645597184619	6.0	6.0747216700612645	0.035087698152030736	6.0	6.0	6.0	6.0	0.0	1	1	0	1	1	1	0	0	0	1	1	1	1	1	0	1	11
1011110110101111	9.528342847706133	9.513427195236432	9.417726281284388	9.486498774742318	0.024504629033664113	6.0	6.0	6.0	6.0	0.0	6.0	6.0	6.0	6.0	0.0	1	0	1	1	1	1	0	1	1	0	1	0	1	1	1	1	12
1010010111010011	9.537117789138325	9.507362003429034	9.46547044102253	9.503316744529963	0.014694719645033728	6.0	6.0	6.0	6.0	0.0	6.0	6.0	6.0	6.0	0.0	1	0	1	0	0	1	0	1	1	1	0	1	0	0	1	1	9
1001111110010010	9.56312165543457	9.51746288598207	9.475478308648901	9.518687616688515	0.017895362681086394	6.0	6.0	6.0	6.0	0.0	6.0	6.0	6.0	6.0	0.0	1	0	0	1	1	1	1	1	1	0	0	1	0	0	1	0	9
1001100011011011	9.549430512034137	9.522964524761148	9.460234184814631	9.510876407203305	0.018701996938524455	6.956077370826542	6.663754999224472	6.043695362341869	6.554509244130961	0.19020217690924535	6.0	6.0	6.0	6.0	0.0	1	0	0	1	1	0	0	0	1	1	0	1	1	0	1	1	9
0111000101111011	9.472312279521198	9.389031959521567	9.369103053648075	9.410149097563613	0.02235130949052513	6.0	6.0	6.0	6.0	0.0	6.0	6.0	6.0	6.0	0.0	0	1	1	1	0	0	0	1	0	1	1	1	1	0	1	1	10
0101110111111101	9.655110344983287	9.535014622823619	9.497685902198006	9.56260362333497	0.03358193588939244	8.111237691922915	8.114209801702303	8.19934906381912	8.141598852481446	0.020426794255318667	6.0	6.0	6.0	6.0	0.0	0	1	0	1	1	1	0	1	1	1	1	1	1	1	0	1	12
0101100101011001	9.528999178722726	9.443370564244619	9.395117140807056	9.455828961258133	0.02768124744667112	6.0	6.0	6.0	6.0	0.0	6.0	6.0	6.0	6.0	0.0	0	1	0	1	1	0	0	1	0	1	0	1	1	0	0	1	8
0011011011110011	9.562589884895583	9.487007056914363	9.450042856302453	9.499879932704133	0.0234200470025499	6.0	6.0	6.0	6.0	0.0	6.0	6.0	6.0	6.0	0.0	0	0	1	1	0	1	1	0	1	1	1	1	0	0	1	1	10
1111111110100011	9.506607046585119	9.566673418942804	9.47526553032524	9.51618199861772	0.018963167391903922	6.0	6.0	6.0	6.0	0.0	6.0	6.0	6.0	6.0	0.0	1	1	1	1	1	1	1	1	1	0	1	0	0	0	1	1	12
1111101001010111	9.478393992778829	9.517766370147001	9.326102177815065	9.440754180246964	0.04132464412256277	6.0	6.0	6.0	6.0	0.0	6.0	6.0	6.0	6.0	0.0	1	1	1	1	1	0	1	0	0	1	0	1	0	1	1	1	11
1111100011000101	9.531323565683488	9.4804476006846	9.519070988165076	9.510280718177722	0.01084006909941034	7.655941104128103	7.427514052849745	7.518781761394938	7.534078972790929	0.04694009115582252	6.0	6.0	6.0	6.0	0.0	1	1	1	1	1	0	0	0	1	1	0	0	0	1	0	1	9
1111011001110001	9.444928183201196	9.525399590164712	9.412367197254158	9.460898323540022	0.02375347167118537	6.0	6.0	6.0	6.0	0.0	6.0	6.0	6.0	6.0	0.0	1	1	1	1	0	1	1	0	0	1	1	1	0	0	0	1	10
1111000011001101	9.529865644899164	9.55581377247832	9.575426645239775	9.55370202087242	0.009330021517865881	7.488670917351392	7.067753380759855	7.3557462967783644	7.304056864963204	0.0878414681624445	6.0	6.0	6.0	6.0	0.0	1	1	1	1	0	0	0	0	1	1	0	0	1	1	0	1	9
1111000001101101	9.450199068019968	9.450702747432825	9.476558998987132	9.459153604813308	0.00615459493654088	6.0	6.0	6.0	6.0	0.0	6.0	6.0	6.0	6.0	0.0	1	1	1	1	0	0	0	0	0	1	1	0	1	1	0	1	9
1110010011000001	9.54388354149848	9.515537969897958	9.48700556699784	9.515475692798093	0.011610188805899084	6.0	6.0	6.0	6.0	0.0	6.0	6.0	6.0	6.0	0.0	1	1	1	0	0	1	0	0	1	1	0	0	0	0	0	1	7
1101110010101111	9.53718068572714	9.561639139352948	9.3696593660969	9.489493063725662	0.04266075539254956	6.0	6.0	6.0	6.0	0.0	6.0	6.0	6.0	6.0	0.0	1	1	0	1	1	1	0	0	1	0	1	0	1	1	1	1	11
1101000101101111	9.498090814839763	9.432528748105575	9.486356389760074	9.47232531756847	0.014272639260422998	6.0	6.0	6.0	6.0	0.0	6.0	6.0	6.0	6.0	0.0	1	1	0	1	0	0	0	1	0	1	1	0	1	1	1	1	10
1011101101110111	9.46171419084807	9.519753217168807	9.370359361713406	9.450608923243427	0.03074661563593985	6.0	6.0	6.0	6.0	0.0	6.0	6.0	6.0	6.0	0.0	1	0	1	1	1	0	1	1	0	1	1	1	0	1	1	1	12
0111111001001111	9.583824114832154	9.545196798938537	9.454820411578488	9.527947108449727	0.02702977595714215	6.0	6.0	6.0	6.0	0.0	6.0	6.0	6.0	6.0	0.0	0	1	1	1	1	1	1	0	0	1	0	0	1	1	1	1	11
0101010101011001	9.531468645006203	9.519112839348091	9.489199962637302	9.513260482330532	0.008872691618072526	6.0	6.0	6.0	6.0	0.0	6.0	6.0	6.0	6.0	0.0	0	1	0	1	0	1	0	1	0	1	0	1	1	0	0	1	8
1111111111101101	9.608078742151356	9.6019985223058	9.596576975999664	9.602218080152273	0.002349071106771589	7.934321267672546	7.741294565263781	7.8704317590363315	7.848682530657553	0.04014473535846002	6.0	6.0	6.0	6.0	0.0	1	1	1	1	1	1	1	1	1	1	1	0	1	1	0	1	14
1111101010001101	9.436371356222212	9.3725506203599	9.289932078711198	9.366284685097769	0.029973771751368623	6.0	6.0	6.0	6.0	0.0	6.0	6.0	6.0	6.0	0.0	1	1	1	1	1	0	1	0	1	0	0	0	1	1	0	1	10
1111010001000011	9.539126290559123	9.435827583682773	9.466746426716318	9.480566766986072	0.021644503014469765	6.0	6.0	6.0	6.0	0.0	6.0	6.0	6.0	6.0	0.0	1	1	1	1	0	1	0	0	0	1	0	0	0	0	1	1	8
1101010101101111	9.526023834542176	9.50836945112532	9.497398358016387	9.510597214561296	0.005895996862662091	6.0	6.0	6.0	6.0	0.0	6.0	6.0	6.0	6.0	0.0	1	1	0	1	0	1	0	1	0	1	1	0	1	1	1	1	11
1101000111100011	9.537994950808596	9.498417880246873	9.525749986047368	9.520720939034279	0.008271987003906581	6.909708703757905	6.922027697566373	6.672065225858071	6.834600542394116	0.05751990415386308	6.0	6.0	6.0	6.0	0.0	1	1	0	1	0	0	0	1	1	1	1	0	0	0	1	1	9
1101000011001101	9.50681991756555	9.528720593883497	9.506956523261842	9.514165678236964	0.0051460153255917475	7.15578156648832	6.972750583421756	6.993961126855584	7.04083109225522	0.040871099065640834	6.0	6.0	6.0	6.0	0.0	1	1	0	1	0	0	0	0	1	1	0	0	1	1	0	1	8
1100011011110101	9.529466355775462	9.578663287614804	9.443438799406973	9.517189480932412	0.027941775160445534	6.0	6.0	6.0	6.0	0.0	6.0	6.0	6.0	6.0	0.0	1	1	0	0	0	1	1	0	1	1	1	1	0	1	0	1	10
1001111110010011	9.576191454301412	9.512077455025832	9.44190903308218	9.510059314136475	0.027419569749881884	6.0	6.0	6.0	6.0	0.0	6.0	6.0	6.0	6.0	0.0	1	0	0	1	1	1	1	1	1	0	0	1	0	0	1	1	10
1001111010011001	9.56632959851847	9.462583697819008	9.44228614202222	9.490399812786565	0.027163078384087592	6.0	6.0	6.0	6.0	0.0	6.0	6.0	6.0	6.0	0.0	1	0	0	1	1	1	1	0	1	0	0	1	1	0	0	1	9
1001011111111011	9.728710680181145	9.615893583092175	9.501624934469296	9.615409732580872	0.04635399939570936	6.0	6.0	6.0	6.0	0.0	6.0	6.0	6.0	6.0	0.0	1	0	0	1	0	1	1	1	1	1	1	1	1	0	1	1	12
1111110101010001	9.577004859349195	9.686033027179127	9.515563269670208	9.592867052066177	0.0352460196916625	6.627342057941698	6.699064179673594	6.076246611903043	6.467550949839445	0.13911945068436432	6.0	6.0	6.0	6.0	0.0	1	1	1	1	1	1	0	1	0	1	0	1	0	0	0	1	10
1111011011111001	9.57956920540909	9.528008142459337	9.517670821850434	9.541749389906288	0.013536794812918638	7.022270591050929	6.851626843315907	6.743856688348727	6.872584707571854	0.0573120106087368	6.0	6.0	6.0	6.0	0.0	1	1	1	1	0	1	1	0	1	1	1	1	1	0	0	1	12
1111000110100010	9.44838523133126	9.425124734682804	9.423223076735466	9.432244347583177	0.0057198509867539965	6.0	6.0	6.0	6.0	0.0	6.0	6.0	6.0	6.0	0.0	1	1	1	1	0	0	0	1	1	0	1	0	0	0	1	0	8
1101110111100011	9.593648450036056	9.58505524498016	9.551802229144323	9.576835308053512	0.009022675813734156	7.703490432257482	7.7092287792393215	7.799166412030481	7.737295207842428	0.021906112492790758	6.0	6.0	6.0	6.0	0.0	1	1	0	1	1	1	0	1	1	1	1	0	0	0	1	1	11
1101101001000100	9.509242290397085	9.555824586548457	9.518936796854168	9.528001224599905	0.01003411237107186	6.0	6.0	6.0	6.0	0.0	6.0	6.0	6.0	6.0	0.0	1	1	0	1	1	0	1	0	0	1	0	0	0	1	0	0	7
1101000011111100	9.596698685234454	9.535968051966881	9.530804825966102	9.554490521055811	0.01496001096357746	6.701480089081374	6.956354339645635	6.012736519901526	6.556856982876179	0.19928644776258883	6.0	6.0	6.0	6.0	0.0	1	1	0	1	0	0	0	0	1	1	1	1	1	1	0	0	9
0101110111111100	9.59205545731289	9.535872613125182	9.506182408170918	9.544703492869663	0.017804650469427877	7.898953348218614	8.069805033198406	8.098536116357359	8.022431499258126	0.04404828623789687	6.0	6.0	6.0	6.0	0.0	0	1	0	1	1	1	0	1	1	1	1	1	1	1	0	0	11
0011101011011101	9.477137386108087	9.462721186204453	9.305022996871005	9.41496052306118	0.038980019355064566	6.5317939315789815	6.7654113418944375	6.0	6.432401757824473	0.1601419858166994	6.0	6.0	6.0	6.0	0.0	0	0	1	1	1	0	1	0	1	1	0	1	1	1	0	1	10
1111010011011101	9.495158443566963	9.571856457974468	9.484078792616693	9.51703123138604	0.01951513843639172	8.214698515271003	7.9330199519121445	7.863602817307491	8.003773761496879	0.07590742548238841	6.0	6.0	6.0	6.0	0.0	1	1	1	1	0	1	0	0	1	1	0	1	1	1	0	1	11
1111000101101111	9.473410441238988	9.48693795884549	9.389993274051092	9.450113891378523	0.021434453978047163	6.0	6.0	6.0	6.0	0.0	6.0	6.0	6.0	6.0	0.0	1	1	1	1	0	0	0	1	0	1	1	0	1	1	1	1	11
1111000011011110	9.575153851361556	9.493436478654203	9.49608374892565	9.521558026313803	0.018956689043204446	7.148446184474313	7.18373462573774	7.077440816321332	7.136540542177795	0.022101665544073164	6.0	6.0	6.0	6.0	0.0	1	1	1	1	0	0	0	0	1	1	0	1	1	1	1	0	10
1110001011101101	9.508953204184069	9.50988393479408	9.542528155747252	9.5204550982418	0.007806316519293184	6.0	6.0	6.0	6.0	0.0	6.0	6.0	6.0	6.0	0.0	1	1	1	0	0	0	1	0	1	1	1	0	1	1	0	1	10
1101111101101011	9.501559840819867	9.658796347350828	9.548485163483972	9.56961378388489	0.032953613096163216	6.0	6.0	6.0	6.0	0.0	6.0	6.0	6.0	6.0	0.0	1	1	0	1	1	1	1	1	0	1	1	0	1	0	1	1	12
1101111001011010	9.631812078056491	9.609544798457206	9.55525648383002	9.598871120114573	0.01607604485387883	6.0	6.0	6.0	6.0	0.0	6.0	6.0	6.0	6.0	0.0	1	1	0	1	1	1	1	0	0	1	0	1	1	0	1	0	10
1101000111100010	9.549321056447043	9.564454393537561	9.553961693928072	9.555912381304225	0.0031651318772794894	6.594600835132461	6.628013019953516	6.339429082252952	6.520680979112977	0.06444413745012909	6.0	6.0	6.0	6.0	0.0	1	1	0	1	0	0	0	1	1	1	1	0	0	0	1	0	8
0111110010000011	9.45767686104306	9.377170343511054	9.361176232337373	9.398674478963828	0.02111442522829162	6.0	6.298438083597126	6.0	6.099479361199042	0.07034253089194843	6.0	6.0	6.0	6.0	0.0	0	1	1	1	1	1	0	0	1	0	0	0	0	0	1	1	8
0111110001110101	9.582326155553533	9.499011788202884	9.478312636455383	9.519883526737267	0.02247748926104	7.095687103231846	6.901890148075113	6.566694219149518	6.854757156818825	0.10925849089888372	6.0	6.0	6.0	6.0	0.0	0	1	1	1	1	1	0	0	0	1	1	1	0	1	0	1	10
0111010111011111	9.533925276260305	9.424859316498297	9.31945848750232	9.426081026753641	0.043779980778893196	7.437719410233385	7.955163186917857	7.8433274643631075	7.745403353838117	0.11115219601516017	6.0	6.0	6.0	6.0	0.0	0	1	1	1	0	1	0	1	1	1	0	1	1	1	1	1	12
0110010011111011	9.555285506739585	9.5360621976155	9.457064403478592	9.516137369277892	0.021250864177189084	6.0	6.0	6.0	6.0	0.0	6.0	6.0	6.0	6.0	0.0	0	1	1	0	0	1	0	0	1	1	1	1	1	0	1	1	10
1111110101100011	9.566877088945882	9.616768477596864	9.496871256942848	9.560172274495196	0.024588451838051324	6.190245775198668	6.308983281063819	6.0	6.166409685420828	0.06363147331334763	6.0	6.0	6.0	6.0	0.0	1	1	1	1	1	1	0	1	0	1	1	0	0	0	1	1	11
1111110011101011	9.634199722642208	9.56304198931203	9.523697702301344	9.573646471418527	0.022865605194313965	8.371471656280558	7.897622013159543	8.066054190071076	8.111715953170394	0.0980621559084526	6.0	6.0	6.0	6.0	0.0	1	1	1	1	1	1	0	0	1	1	1	0	1	0	1	1	12
1111001011111111	9.492211304746442	9.487709664735881	9.541599554975962	9.50717350815276	0.0122060826066422	7.227202311190126	7.369898954029014	7.183965978323747	7.26035574784763	0.03972222433203304	6.0	6.0	6.0	6.0	0.0	1	1	1	1	0	0	1	0	1	1	1	1	1	1	1	1	13
1100010011000101	9.556762021109206	9.476006090701981	9.489718242685386	9.507495451498857	0.017641815566443567	6.0	6.0	6.0	6.0	0.0	6.0	6.0	6.0	6.0	0.0	1	1	0	0	0	1	0	0	1	1	0	0	0	1	0	1	7
1001110010010101	9.565183131659678	9.45844889178063	9.394106959584589	9.472579661008298	0.035276345101192645	6.0	6.0	6.0	6.0	0.0	6.0	6.0	6.0	6.0	0.0	1	0	0	1	1	1	0	0	1	0	0	1	0	1	0	1	8
0101000111101111	9.544915243485367	9.473049548538372	9.404122634732113	9.47402914225195	0.028741257722333102	6.452615147034371	6.769289149642193	6.541042129279678	6.587648808652081	0.06670799914990987	6.0	6.0	6.0	6.0	0.0	0	1	0	1	0	0	0	1	1	1	1	0	1	1	1	1	10
1101101111011001	9.512573845165306	9.592699331372618	9.484126372052485	9.529799849530136	0.02298395561279535	7.088711771812697	6.950951132246286	6.851950371478073	6.963871091845685	0.04854411084972216	6.0	6.0	6.0	6.0	0.0	1	1	0	1	1	0	1	1	1	1	0	1	1	0	0	1	11
1101101101111010	9.57465251734759	9.58226656429438	9.455767701520225	9.537562261054065	0.028960478543261236	6.0	6.0	6.0	6.0	0.0	6.0	6.0	6.0	6.0	0.0	1	1	0	1	1	0	1	1	0	1	1	1	1	0	1	0	11
1011011011011001	9.531367521291887	9.548780572367967	9.417654874286553	9.499267655982136	0.029072576393721603	6.0	6.0	6.0	6.0	0.0	6.0	6.0	6.0	6.0	0.0	1	0	1	1	0	1	1	0	1	1	0	1	1	0	0	1	10
1011000011011001	9.470071557092393	9.44686866072675	9.605170903617555	9.507370373812233	0.034900576219192604	7.253410793458527	7.103921898024402	7.159541647415223	7.172291446299384	0.03084544940294706	6.0	6.0	6.0	6.0	0.0	1	0	1	1	0	0	0	0	1	1	0	1	1	0	0	1	8
1001100011111100	9.63759703847821	9.512322665518344	9.483195530026997	9.544371744674516	0.03349207383613706	6.635658563150409	6.695047405616485	6.0	6.443568656255631	0.15729305094932675	6.0	6.0	6.0	6.0	0.0	1	0	0	1	1	0	0	0	1	1	1	1	1	1	0	0	9
1001011011001111	9.628882137924947	9.517527971093132	9.564600476549039	9.570336861855706	0.022820375416835306	6.0	6.0	6.0	6.0	0.0	6.0	6.0	6.0	6.0	0.0	1	0	0	1	0	1	1	0	1	1	0	0	1	1	1	1	10
1001010011011111	9.61615820015944	9.531781821251672	9.538827260221842	9.562255760544318	0.019111577206486655	6.636012306991479	6.544307503664802	6.0	6.393439936885428	0.1403559051664748	6.0	6.0	6.0	6.0	0.0	1	0	0	1	0	1	0	0	1	1	0	1	1	1	1	1	10
1001010011010101	9.533019132285073	9.481868665119515	9.575720851457254	9.53020288295395	0.019183355047691218	6.105772218457018	6.657401053121103	6.0	6.254391090526041	0.14411205883645156	6.0	6.0	6.0	6.0	0.0	1	0	0	1	0	1	0	0	1	1	0	1	0	1	0	1	8
0001011111111011	9.62793671893596	9.497485008213973	9.425930653353056	9.517117460167663	0.04181444628824775	6.0	6.0	6.0	6.0	0.0	6.0	6.0	6.0	6.0	0.0	0	0	0	1	0	1	1	1	1	1	1	1	1	0	1	1	11
1111111110101011	9.526744700238726	9.626403881821004	9.506795007476144	9.55331452984529	0.02615988528740936	6.0	6.0	6.0	6.0	0.0	6.0	6.0	6.0	6.0	0.0	1	1	1	1	1	1	1	1	1	0	1	0	1	0	1	1	13
1111101011111010	9.528528833120882	9.605542756205836	9.562083770342348	9.565385119889688	0.01576367273649066	7.406033940537358	7.404552628427204	7.316278043487227	7.37562153748393	0.020983272231289624	6.0	6.0	6.0	6.0	0.0	1	1	1	1	1	0	1	0	1	1	1	1	1	0	1	0	12
1111000101011111	9.470909240239411	9.573879447013736	9.402782519520539	9.482523735591228	0.03516558930287567	6.0	6.0	6.0	6.0	0.0	6.0	6.0	6.0	6.0	0.0	1	1	1	1	0	0	0	1	0	1	0	1	1	1	1	1	11
1110010011011111	9.408771777501698	9.50980463264982	9.522403798948073	9.48032673636653	0.025428884008359458	6.0	6.0	6.0	6.0	0.0	6.0	6.0	6.0	6.0	0.0	1	1	1	0	0	1	0	0	1	1	0	1	1	1	1	1	11
1101000111001000	9.56874369171407	9.529835863009172	9.547607440982633	9.548728998568626	0.007951920126573767	6.9477647786489385	6.646860164972199	6.409913679062313	6.668179540894484	0.1100468371300166	6.0	6.0	6.0	6.0	0.0	1	1	0	1	0	0	0	1	1	1	0	0	1	0	0	0	7
1100010011111011	9.579382088337821	9.491811798659418	9.513587893146044	9.528260593381093	0.018612742085869625	6.0	6.0	6.0	6.0	0.0	6.0	6.0	6.0	6.0	0.0	1	1	0	0	0	1	0	0	1	1	1	1	1	0	1	1	10
1011101011000101	9.541498449403225	9.490800245292547	9.480994360967227	9.504431018554333	0.01325729147899011	7.033337010962588	6.5682599445660435	6.696838466284106	6.766145140604245	0.09804482882079361	6.0	6.0	6.0	6.0	0.0	1	0	1	1	1	0	1	0	1	1	0	0	0	1	0	1	9
1001000110010011	9.433120484310617	9.33293211162858	9.328641289365557	9.364897961768252	0.024136201114563504	6.0	6.0	6.0	6.0	0.0	6.0	6.0	6.0	6.0	0.0	1	0	0	1	0	0	0	1	1	0	0	1	0	0	1	1	7
0101010011000101	9.542825198025133	9.486324004970488	9.476906784009602	9.502018662335074	0.014554787465095264	6.582430371731401	7.028058048830832	6.784112271394725	6.79820023065232	0.09109963373169287	6.0	6.0	6.0	6.0	0.0	0	1	0	1	0	1	0	0	1	1	0	0	0	1	0	1	7
0010010111110101	9.563296421900347	9.487669249642332	9.399600284665604	9.48352198540276	0.03344649006721665	6.0	6.0	6.0	6.0	0.0	6.0	6.0	6.0	6.0	0.0	0	0	1	0	0	1	0	1	1	1	1	1	0	1	0	1	9
1111110011111101	9.595146361225536	9.575289610383358	9.53751883445957	9.569318268689488	0.011951120250902864	8.988530352593862	9.102659151887476	8.92529802575991	9.00549584341375	0.036697214186682224	7.4079934948854875	7.199351418963613	7.576683963274608	7.3946762923745695	0.07716645769707821	1	1	1	1	1	1	0	0	1	1	1	1	1	1	0	1	13
1111010111100001	9.523182528840378	9.494951876884546	9.556250314274424	9.524794906666449	0.012525470239347644	7.240037881606152	7.295186355456027	7.481695599298581	7.338973278786919	0.05170039348845675	6.0	6.0	6.0	6.0	0.0	1	1	1	1	0	1	0	1	1	1	1	0	0	0	0	1	10
1111001101101100	9.454020583111395	9.535956590599227	9.550142368573207	9.513373180761276	0.021183158444163647	6.0	6.0	6.0	6.0	0.0	6.0	6.0	6.0	6.0	0.0	1	1	1	1	0	0	1	1	0	1	1	0	1	1	0	0	10
1111000110100101	9.363958888433537	9.36116524736634	9.393922698634023	9.373015611477967	0.007413735311526947	6.0	6.0	6.0	6.0	0.0	6.0	6.0	6.0	6.0	0.0	1	1	1	1	0	0	0	1	1	0	1	0	0	1	0	1	9
1101110110100101	9.481375588082605	9.542921970958233	9.384700492962882	9.469666017334573	0.03256108249655742	6.0	6.063652838184966	6.0	6.0212176127283215	0.015003117840786525	6.0	6.0	6.0	6.0	0.0	1	1	0	1	1	1	0	1	1	0	1	0	0	1	0	1	10
1101110101110011	9.52997399063076	9.587393279548714	9.51706473208924	9.544810667422903	0.015284095113416498	6.0	6.0	6.0	6.0	0.0	6.0	6.0	6.0	6.0	0.0	1	1	0	1	1	1	0	1	0	1	1	1	0	0	1	1	11
1101110011011101	9.578795199103288	9.639168957653423	9.506911115899088	9.5749584242186	0.027031077199880803	7.919083172722837	7.671858543327577	7.817743628309149	7.80289511478652	0.05073684248203274	6.0	6.0	6.0	6.0	0.0	1	1	0	1	1	1	0	0	1	1	0	1	1	1	0	1	11
1101010011110101	9.644259996645689	9.533502067101274	9.587543375476237	9.588435146407733	0.022610566043286998	7.274359312141107	6.8061991172963845	7.063748559663731	7.048102329700408	0.09572277279842302	6.0	6.0	6.0	6.0	0.0	1	1	0	1	0	1	0	0	1	1	1	1	0	1	0	1	10
1100010111101101	9.472509391982117	9.545969430107641	9.55329894313341	9.523925921741055	0.018239951981102898	6.0	6.0	6.0	6.0	0.0	6.0	6.0	6.0	6.0	0.0	1	1	0	0	0	1	0	1	1	1	1	0	1	1	0	1	10
1100010111010011	9.528424382460683	9.554082305319184	9.47371499141839	9.518740559732754	0.016758374040444574	6.0	6.0	6.0	6.0	0.0	6.0	6.0	6.0	6.0	0.0	1	1	0	0	0	1	0	1	1	1	0	1	0	0	1	1	9
1001111010010001	9.580979916751904	9.461456271864668	9.450050601721262	9.497495596779277	0.029607842679555595	6.0	6.0	6.0	6.0	0.0	6.0	6.0	6.0	6.0	0.0	1	0	0	1	1	1	1	0	1	0	0	1	0	0	0	1	8
1001110111010011	9.581150302644627	9.549283149600141	9.465147332152917	9.531860261465894	0.02446712101279655	7.218337573224473	7.384511527817409	7.463567649083452	7.355472250041778	0.05109942476314815	6.0	6.0	6.0	6.0	0.0	1	0	0	1	1	1	0	1	1	1	0	1	0	0	1	1	10
1001101101111101	9.464805890265248	9.465330457551994	9.37560744972165	9.435247932512965	0.02108636677806828	6.0	6.0	6.0	6.0	0.0	6.0	6.0	6.0	6.0	0.0	1	0	0	1	1	0	1	1	0	1	1	1	1	1	0	1	11
1001101011000101	9.555520348200984	9.477983990416574	9.46417221012018	9.499225516245913	0.020101916978969323	6.6556241311755535	6.547014158504808	6.26625443261154	6.489630907430634	0.08202826613210727	6.0	6.0	6.0	6.0	0.0	1	0	0	1	1	0	1	0	1	1	0	0	0	1	0	1	8
0001011101111101	9.660317957055645	9.440992167096413	9.430670314215645	9.510660146122568	0.052953958683752765	6.0	6.0	6.0	6.0	0.0	6.0	6.0	6.0	6.0	0.0	0	0	0	1	0	1	1	1	0	1	1	1	1	1	0	1	10
1111101011101111	9.524697867367244	9.59429418093437	9.558611679434806	9.559201242578807	0.014207817120978197	7.606324188236637	7.4944560655767845	7.4924895114754095	7.531089921762944	0.026602358832236467	6.0	6.0	6.0	6.0	0.0	1	1	1	1	1	0	1	0	1	1	1	0	1	1	1	1	13
1111010110101111	9.467681476374066	9.523574454303844	9.376385652416943	9.455880527698284	0.030333102496727136	6.0	6.0	6.0	6.0	0.0	6.0	6.0	6.0	6.0	0.0	1	1	1	1	0	1	0	1	1	0	1	0	1	1	1	1	12
1101111011110010	9.630742763143632	9.55997260813256	9.544720488180332	9.57847861981884	0.018738606755683933	7.022743387756275	7.034229651468476	7.030920976214262	7.029298005146337	0.0024138175100880655	6.0	6.0	6.0	6.0	0.0	1	1	0	1	1	1	1	0	1	1	1	1	0	0	1	0	11
1101011111111010	9.597599703367104	9.570435947977906	9.554222401473446	9.57408601760615	0.008947903256365625	6.0	6.0	6.0	6.0	0.0	6.0	6.0	6.0	6.0	0.0	1	1	0	1	0	1	1	1	1	1	1	1	1	0	1	0	12
1101011011011101	9.586901013458913	9.534175873147284	9.575769766678755	9.565615551094984	0.011345455593992495	6.0	6.0	6.0	6.0	0.0	6.0	6.0	6.0	6.0	0.0	1	1	0	1	0	1	1	0	1	1	0	1	1	1	0	1	11
1101010111000011	9.52869695026158	9.570913517095372	9.50987458371382	9.536495017023592	0.012760911873164056	7.0939646346935135	6.891057304011681	6.7594854627301775	6.914835800478457	0.06879091726624126	6.0	6.0	6.0	6.0	0.0	1	1	0	1	0	1	0	1	1	1	0	0	0	0	1	1	9
1101010110101001	9.438653876422572	9.494729086182817	9.416438911281283	9.44994062462889	0.016471596185215445	6.0	6.0	6.0	6.0	0.0	6.0	6.0	6.0	6.0	0.0	1	1	0	1	0	1	0	1	1	0	1	0	1	0	0	1	9
1100010111010111	9.529313688220283	9.55184382721567	9.495510264534893	9.52555592665695	0.011575535625133526	6.0	6.0	6.0	6.0	0.0	6.0	6.0	6.0	6.0	0.0	1	1	0	0	0	1	0	1	1	1	0	1	0	1	1	1	10
1011010111110010	9.553213084416507	9.517457106298238	9.547522036120409	9.539397408945051	0.007843571336371069	6.9367530268741735	6.936055837246388	6.774495527394593	6.882434797171718	0.03816256016123343	6.0	6.0	6.0	6.0	0.0	1	0	1	1	0	1	0	1	1	1	1	1	0	0	1	0	10
1001111110011011	9.483457399097023	9.52756022914576	9.418391348378426	9.476469658873738	0.022420535665133582	6.0	6.0	6.0	6.0	0.0	6.0	6.0	6.0	6.0	0.0	1	0	0	1	1	1	1	1	1	0	0	1	1	0	1	1	11
0111010011111011	9.484398555624939	9.45406961515691	9.453107373824377	9.463858514868742	0.007264656825975665	7.751775192107684	7.698269660202298	7.742020269049964	7.7306883737866485	0.01163342435838524	6.0	6.0	6.0	6.0	0.0	0	1	1	1	0	1	0	0	1	1	1	1	1	0	1	1	11
0110010011110101	9.550178376785873	9.415653997638776	9.364513029960255	9.443448468128302	0.03915206400543487	6.0	6.0	6.0	6.0	0.0	6.0	6.0	6.0	6.0	0.0	0	1	1	0	0	1	0	0	1	1	1	1	0	1	0	1	9
0101111101011101	9.57000684046804	9.505813686732637	9.454459571020221	9.510093366073633	0.023634472036476648	6.0	6.0	6.0	6.0	0.0	6.0	6.0	6.0	6.0	0.0	0	1	0	1	1	1	1	1	0	1	0	1	1	1	0	1	11
0101110101111101	9.642410385559003	9.558163429415515	9.468017294371702	9.55619703644874	0.03560462888782967	6.47133382462592	6.571068668133552	6.662194549972036	6.568199014243835	0.03897249094980647	6.0	6.0	6.0	6.0	0.0	0	1	0	1	1	1	0	1	0	1	1	1	1	1	0	1	11
1111111111010101	9.579674353292424	9.631559192225355	9.501594651619023	9.570942732378933	0.02670791504587614	8.795393911351464	8.37753462368856	8.324600004185985	8.499176179742003	0.10528471468306132	7.146051037632981	7.419097477216447	7.838274059719303	7.467807524856243	0.1423450500441231	1	1	1	1	1	1	1	1	1	1	0	1	0	1	0	1	13
1111101111011111	9.45863620615641	9.61547346361809	9.568064626516652	9.54739143209705	0.03283802942133377	7.907011304211648	7.694394582543273	7.882001764371921	7.827802550375615	0.04744230475292223	6.0	6.0	6.0	6.0	0.0	1	1	1	1	1	0	1	1	1	1	0	1	1	1	1	1	14
1101111010000101	9.528226301820645	9.523932927575297	9.405962454880088	9.486040561425343	0.02832544682350601	6.0	6.0	6.0	6.0	0.0	6.0	6.0	6.0	6.0	0.0	1	1	0	1	1	1	1	0	1	0	0	0	0	1	0	1	9
1101001001011101	9.434400202815667	9.451479237870846	9.455617082214008	9.447165507633507	0.004591571885373998	6.0	6.0	6.0	6.0	0.0	6.0	6.0	6.0	6.0	0.0	1	1	0	1	0	0	1	0	0	1	0	1	1	1	0	1	9
1100010111110011	9.53466319135568	9.594700390322066	9.524584501274656	9.5513160276508	0.015476041654393985	6.0	6.0	6.0	6.0	0.0	6.0	6.0	6.0	6.0	0.0	1	1	0	0	0	1	0	1	1	1	1	1	0	0	1	1	10
1100010011110011	9.54508610857628	9.539526060041283	9.509793995904607	9.53146872150739	0.0077467609617916005	6.0	6.0	6.0	6.0	0.0	6.0	6.0	6.0	6.0	0.0	1	1	0	0	0	1	0	0	1	1	1	1	0	0	1	1	9
1001011111011111	9.594106734663246	9.472093302196608	9.473838402217158	9.513346146359003	0.02855540173929694	6.0	6.0	6.0	6.0	0.0	6.0	6.0	6.0	6.0	0.0	1	0	0	1	0	1	1	1	1	1	0	1	1	1	1	1	12
1001010010010011	9.471926144043241	9.393592164431553	9.335150312763522	9.400222873746104	0.028017499695354407	6.0	6.0	6.0	6.0	0.0	6.0	6.0	6.0	6.0	0.0	1	0	0	1	0	1	0	0	1	0	0	1	0	0	1	1	7
1111110011010010	9.634005179166737	9.632198928336567	9.500008014370936	9.58873737395808	0.031372732521182375	8.52989918085782	8.257647230952866	8.339376122689378	8.375640844833356	0.05703307316942981	6.0	6.0	6.0	6.0	0.0	1	1	1	1	1	1	0	0	1	1	0	1	0	0	1	0	10
1111101111010010	9.508265546697402	9.573205629983745	9.441687377788664	9.507719518156604	0.026846744915935125	7.549657939309077	7.2484339972496095	7.199712252942352	7.332601396500347	0.07738282450921534	6.0	6.0	6.0	6.0	0.0	1	1	1	1	1	0	1	1	1	1	0	1	0	0	1	0	11
1111000101010101	9.524908376558416	9.462963006632805	9.449980844510954	9.479284075900724	0.01634684853020644	6.0	6.0	6.0	6.0	0.0	6.0	6.0	6.0	6.0	0.0	1	1	1	1	0	0	0	1	0	1	0	1	0	1	0	1	9
1101111011100100	9.617518223833152	9.620413930251717	9.625026482161074	9.62098621208198	0.001545914812747949	7.339040150163491	7.247916326740698	7.418509635680504	7.335155370861564	0.03484928955858012	6.0	6.0	6.0	6.0	0.0	1	1	0	1	1	1	1	0	1	1	1	0	0	1	0	0	10
1101011111010011	9.527476961910182	9.526171644781838	9.500107663321954	9.517918756671326	0.006302806886966982	6.0	6.0	6.0	6.0	0.0	6.0	6.0	6.0	6.0	0.0	1	1	0	1	0	1	1	1	1	1	0	1	0	0	1	1	11
1101011111001100	9.531368193075274	9.53376217337552	9.522833755779528	9.529321374076774	0.002345196466452169	6.0	6.0	6.0	6.0	0.0	6.0	6.0	6.0	6.0	0.0	1	1	0	1	0	1	1	1	1	1	0	0	1	1	0	0	10
1101010101111111	9.436698179149944	9.562276600426461	9.419388806807584	9.472787862127996	0.031835722347728454	6.0	6.0	6.0	6.0	0.0	6.0	6.0	6.0	6.0	0.0	1	1	0	1	0	1	0	1	0	1	1	1	1	1	1	1	12
1101000011011001	9.503169603294335	9.389821965812548	9.481768049616406	9.458253206241096	0.024585336499967088	7.227065170654184	7.031122146681237	6.426710010750532	6.894965776028651	0.17031637886008072	6.0	6.0	6.0	6.0	0.0	1	1	0	1	0	0	0	0	1	1	0	1	1	0	0	1	8
1001011111011001	9.594109123409249	9.501632101083324	9.490155124616654	9.528632116369742	0.023267857247509172	6.0	6.0	6.0	6.0	0.0	6.0	6.0	6.0	6.0	0.0	1	0	0	1	0	1	1	1	1	1	0	1	1	0	0	1	10
0101110101011111	9.620790697019114	9.569006734985997	9.534261224651432	9.574686218885516	0.01777652853287632	6.0	6.0	6.0	6.0	0.0	6.0	6.0	6.0	6.0	0.0	0	1	0	1	1	1	0	1	0	1	0	1	1	1	1	1	11
1111111101111001	9.66948007347724	9.605322053814303	9.504118743641737	9.592973623644427	0.03403541084171699	6.647820735009041	6.454819141043576	6.0	6.367546625350872	0.13578800583594344	6.0	6.0	6.0	6.0	0.0	1	1	1	1	1	1	1	1	0	1	1	1	1	0	0	1	13
1111101110101111	9.416442229942174	9.461650150852037	9.351314742122746	9.409802374305652	0.02264413598491646	6.0	6.0	6.0	6.0	0.0	6.0	6.0	6.0	6.0	0.0	1	1	1	1	1	0	1	1	1	0	1	0	1	1	1	1	13
1111101011100001	9.543967815763613	9.583674803151236	9.484874201445695	9.537505606786848	0.020296591803341365	7.3935784773460895	7.19103060352649	7.2645689388564065	7.283059339909662	0.041858554473255136	6.0	6.0	6.0	6.0	0.0	1	1	1	1	1	0	1	0	1	1	1	0	0	0	0	1	10
1111000101010000	9.520043270624274	9.458904215103297	9.433827487681745	9.47092499113644	0.01810462463675859	6.0	6.0	6.0	6.0	0.0	6.0	6.0	6.0	6.0	0.0	1	1	1	1	0	0	0	1	0	1	0	1	0	0	0	0	7
1110010111101111	9.485206128353989	9.528471451199712	9.435368846528863	9.483015475360855	0.019020265374622234	6.0	6.0	6.0	6.0	0.0	6.0	6.0	6.0	6.0	0.0	1	1	1	0	0	1	0	1	1	1	1	0	1	1	1	1	12
1101011011110100	9.635010226869424	9.490549397518528	9.523222391267598	9.549594005218518	0.030926874292351247	6.0	6.0	6.0	6.0	0.0	6.0	6.0	6.0	6.0	0.0	1	1	0	1	0	1	1	0	1	1	1	1	0	1	0	0	10
0011110010010100	9.527131216157947	9.44545640814366	9.361165696663328	9.444584440321645	0.033878972488333915	6.0	6.0	6.0	6.0	0.0	6.0	6.0	6.0	6.0	0.0	0	0	1	1	1	1	0	0	1	0	0	1	0	1	0	0	7
0011110001001111	9.613471820412427	9.508871335860425	9.379626214035252	9.500656456769368	0.047821813510045906	6.0	6.0	6.0	6.0	0.0	6.0	6.0	6.0	6.0	0.0	0	0	1	1	1	1	0	0	0	1	0	0	1	1	1	1	9
1111111111100011	9.607946899308507	9.630187736767603	9.51129947182998	9.583144702635364	0.02580363864790367	7.6743650545836735	7.606800498359768	7.808400405549184	7.69652198616421	0.04189038843118563	6.0	6.0	6.0	6.0	0.0	1	1	1	1	1	1	1	1	1	1	1	0	0	0	1	1	13
1111010101010011	9.533846350791386	9.49438127383998	9.48776804520416	9.505331889945175	0.010171361399045549	6.0	6.0	6.0	6.0	0.0	6.0	6.0	6.0	6.0	0.0	1	1	1	1	0	1	0	1	0	1	0	1	0	0	1	1	10
1101110111111100	9.590414508227132	9.601918489443763	9.54561465383036	9.579315883833752	0.012144375061211915	7.850362986839267	7.783593814660086	7.921201557490764	7.851719452996705	0.028093156705461513	6.0	6.0	6.0	6.0	0.0	1	1	0	1	1	1	0	1	1	1	1	1	1	1	0	0	12
1101110001111011	9.570882847408953	9.56281086456871	9.555813032379529	9.56316891478573	0.0030787167571271782	6.217391713761673	6.0	6.0	6.072463904587224	0.05123971832488129	6.0	6.0	6.0	6.0	0.0	1	1	0	1	1	1	0	0	0	1	1	1	1	0	1	1	11
1100010011010011	9.49965274688875	9.486349667404669	9.499784101892287	9.495262172061901	0.0031511603149510267	6.0	6.0	6.0	6.0	0.0	6.0	6.0	6.0	6.0	0.0	1	1	0	0	0	1	0	0	1	1	0	1	0	0	1	1	8
0111010001010011	9.510852027150845	9.458840408096984	9.41675721996782	9.462149885071883	0.01924262916499104	6.0	6.0	6.0	6.0	0.0	6.0	6.0	6.0	6.0	0.0	0	1	1	1	0	1	0	0	0	1	0	1	0	0	1	1	8
0101111001001111	9.60929212783414	9.458885596320195	9.404152542114913	9.490776755423083	0.04336539889696672	6.0	6.0	6.0	6.0	0.0	6.0	6.0	6.0	6.0	0.0	0	1	0	1	1	1	1	0	0	1	0	0	1	1	1	1	10
0101110001001101	9.57753639466554	9.501962128185475	9.48986358581942	9.523120702890145	0.019396710697916	6.0	6.223833951145585	6.0	6.074611317048529	0.05275816823827393	6.0	6.0	6.0	6.0	0.0	0	1	0	1	1	1	0	0	0	1	0	0	1	1	0	1	8
0100010011111111	9.609842794349717	9.52774124807477	9.41637149118168	9.517985177868722	0.03964251078237357	6.0	6.0	6.0	6.0	0.0	6.0	6.0	6.0	6.0	0.0	0	1	0	0	0	1	0	0	1	1	1	1	1	1	1	1	10
0011110010001111	9.547325097725807	9.410736574878765	9.389004589644676	9.449022087416417	0.035037316232054215	6.0	6.0	6.0	6.0	0.0	6.0	6.0	6.0	6.0	0.0	0	0	1	1	1	1	0	0	1	0	0	0	1	1	1	1	9
1111111001010001	9.622736216414944	9.6178578871018	9.549530476058898	9.596708193191882	0.01670953953899635	6.0	6.0	6.0	6.0	0.0	6.0	6.0	6.0	6.0	0.0	1	1	1	1	1	1	1	0	0	1	0	1	0	0	0	1	10
1111110111010100	9.554108048537502	9.555824771823831	9.512309238538126	9.540747352966486	0.010060496582267021	8.719036282462499	8.489915698424571	8.59149616768606	8.60014938285771	0.0468690002508328	6.0	6.0	6.435856469476816	6.145285489825606	0.10273235506369466	1	1	1	1	1	1	0	1	1	1	0	1	0	1	0	0	11
1111101101011101	9.478581456256624	9.425440057991857	9.38570010686652	9.429907207038333	0.01902499597715353	6.0	6.0	6.0	6.0	0.0	6.0	6.0	6.0	6.0	0.0	1	1	1	1	1	0	1	1	0	1	0	1	1	1	0	1	12
1111010101101111	9.446636802281956	9.468726844988424	9.418163623015614	9.444509090095332	0.010348552422358036	6.0	6.0	6.0	6.0	0.0	6.0	6.0	6.0	6.0	0.0	1	1	1	1	0	1	0	1	0	1	1	0	1	1	1	1	12
1111000101111011	9.499143609471519	9.530903940111589	9.501772365680608	9.510606638421239	0.007196213491986935	6.0	6.0	6.0	6.0	0.0	6.0	6.0	6.0	6.0	0.0	1	1	1	1	0	0	0	1	0	1	1	1	1	0	1	1	11
1101111110100011	9.53554902045625	9.562053284000354	9.465548819637037	9.52105037469788	0.020354917330269725	6.0	6.0	6.0	6.0	0.0	6.0	6.0	6.0	6.0	0.0	1	1	0	1	1	1	1	1	1	0	1	0	0	0	1	1	11
1101111011011100	9.608796276588755	9.625920112892427	9.484829918930838	9.573182102804006	0.031432169664234524	7.1138283287841695	7.426354517792566	7.275742273537418	7.2719750400380505	0.06380804382443625	6.0	6.0	6.0	6.0	0.0	1	1	0	1	1	1	1	0	1	1	0	1	1	1	0	0	11
1011001011000011	9.54690100211978	9.485690201770762	9.505431500470037	9.512674234786859	0.01275430267354186	6.2421927219539635	6.170421887754863	6.0	6.137538203236275	0.050786040031531546	6.0	6.0	6.0	6.0	0.0	1	0	1	1	0	0	1	0	1	1	0	0	0	0	1	1	8
0111011101111101	9.532924632178618	9.458329189922896	9.447242304993333	9.479498709031615	0.0190240054599551	6.0	6.0	6.0	6.0	0.0	6.0	6.0	6.0	6.0	0.0	0	1	1	1	0	1	1	1	0	1	1	1	1	1	0	1	12
1111111101101011	9.56198005400557	9.614928307539145	9.568261021272637	9.581723127605784	0.011809604976865676	6.0	6.0	6.0	6.0	0.0	6.0	6.0	6.0	6.0	0.0	1	1	1	1	1	1	1	1	0	1	1	0	1	0	1	1	13
1111110011010101	9.529653752595218	9.554583046131368	9.53327268141061	9.539169826712397	0.005499237236285474	8.687027397198571	8.711532857270765	8.775617270477365	8.724725841648901	0.018675217711758615	7.701689844417161	7.446925886414213	7.351343435116568	7.499986388649314	0.07393377025028952	1	1	1	1	1	1	0	0	1	1	0	1	0	1	0	1	11
1111000111100111	9.499698488730713	9.52838790452201	9.554690676275637	9.527592356509453	0.01122875657426231	7.534750028462063	7.287623704516295	7.392011803610829	7.404795178863062	0.050646513550402616	6.0	6.0	6.0	6.0	0.0	1	1	1	1	0	0	0	1	1	1	1	0	0	1	1	1	11
1101010001110101	9.496524092701325	9.494296890034184	9.456439380831027	9.482420121188845	0.009196822459282751	6.0	6.0	6.0	6.0	0.0	6.0	6.0	6.0	6.0	0.0	1	1	0	1	0	1	0	0	0	1	1	1	0	1	0	1	9
1101000001011011	9.468562831062624	9.545188770320268	9.524928459821774	9.512893353734889	0.016209649778609184	6.0	6.0	6.0	6.0	0.0	6.0	6.0	6.0	6.0	0.0	1	1	0	1	0	0	0	0	0	1	0	1	1	0	1	1	8
1010010111011111	9.562749741574349	9.511078984157663	9.405476031777855	9.493101585836623	0.03272650578680565	6.0	6.0	6.0	6.0	0.0	6.0	6.0	6.0	6.0	0.0	1	0	1	0	0	1	0	1	1	1	0	1	1	1	1	1	11
1001111111111011	9.587281618123376	9.559363465973917	9.52962831194529	9.55875779868086	0.011770379864787945	6.869426718976174	6.7030145699282855	6.611326055578036	6.727922448160832	0.05341549386675377	6.0	6.0	6.0	6.0	0.0	1	0	0	1	1	1	1	1	1	1	1	1	1	0	1	1	13
1001110111100011	9.620955753131918	9.572044625937773	9.504249904340126	9.565750094469939	0.023926204707923688	7.4880667427593215	7.379197386475557	7.395504401125043	7.420922843453307	0.023971187886734562	6.0	6.0	6.0	6.0	0.0	1	0	0	1	1	1	0	1	1	1	1	0	0	0	1	1	10
1001000010010011	9.464108296557775	9.311238012387337	9.342369968989585	9.3725720926449	0.032980946900081055	6.0	6.0	6.0	6.0	0.0	6.0	6.0	6.0	6.0	0.0	1	0	0	1	0	0	0	0	1	0	0	1	0	0	1	1	6
0111011101011100	9.577095203731467	9.48130659336609	9.527602164362074	9.528667987153211	0.019556399006459353	6.0	6.0	6.0	6.0	0.0	6.0	6.0	6.0	6.0	0.0	0	1	1	1	0	1	1	1	0	1	0	1	1	1	0	0	10
0101011111101101	9.574583884056642	9.506203646031283	9.539478672401188	9.540088734163037	0.013959724027932028	6.0	6.454923479038263	6.197220451267799	6.217381310102021	0.09313403255234662	6.0	6.0	6.0	6.0	0.0	0	1	0	1	0	1	1	1	1	1	1	0	1	1	0	1	11
1111101101010111	9.471886934295204	9.47385313016613	9.395953684028127	9.447231249496488	0.018133799113911515	6.0	6.0	6.0	6.0	0.0	6.0	6.0	6.0	6.0	0.0	1	1	1	1	1	0	1	1	0	1	0	1	0	1	1	1	12
1111010111010011	9.623157012725292	9.506207848832137	9.414343344861967	9.514569402139799	0.04272630659582256	7.8308541944142815	7.637121990379239	8.052932331164714	7.840302838652744	0.08494264489886885	6.0	6.0	6.0	6.0	0.0	1	1	1	1	0	1	0	1	1	1	0	1	0	0	1	1	11
1111000011100101	9.554888081911967	9.519403817737793	9.536794924425312	9.537028941358356	0.0072436676246609	7.171991321475098	7.495057952167494	7.308051147331628	7.325033473658074	0.06621846610818825	6.0	6.0	6.0	6.0	0.0	1	1	1	1	0	0	0	0	1	1	1	0	0	1	0	1	9
1111000011000011	9.562512672025036	9.463156028142519	9.510076185299283	9.51191496182228	0.020291506824389537	7.116091410693784	6.828433868811947	7.127083187344535	7.023869488950088	0.06913334458683205	6.0	6.0	6.0	6.0	0.0	1	1	1	1	0	0	0	0	1	1	0	0	0	0	1	1	8
1101111010011010	9.460196775439924	9.525528853846827	9.428877467429636	9.47153436557213	0.020131974305383438	6.0	6.0	6.0	6.0	0.0	6.0	6.0	6.0	6.0	0.0	1	1	0	1	1	1	1	0	1	0	0	1	1	0	1	0	10
1101110101000001	9.62374156618836	9.570626942742413	9.636096401448944	9.610154970126572	0.014200992924447011	6.0	6.0	6.0	6.0	0.0	6.0	6.0	6.0	6.0	0.0	1	1	0	1	1	1	0	1	0	1	0	0	0	0	0	1	8
1011110001011101	9.619526984470225	9.532985860131973	9.440970867665609	9.531161237422603	0.03645332323238764	6.0	6.0	6.0	6.0	0.0	6.0	6.0	6.0	6.0	0.0	1	0	1	1	1	1	0	0	0	1	0	1	1	1	0	1	10
1011010111010011	9.590173887289406	9.535633398524183	9.497330731634632	9.541046005816073	0.0190479006990987	7.141117102394731	7.183343085136343	7.208656119290569	7.177705435607215	0.013929686643843451	6.305029468491613	6.08142992056572	6.0	6.1288197963524444	0.06447880066008756	1	0	1	1	0	1	0	1	1	1	0	1	0	0	1	1	10
1000101111010110	9.625205543003661	9.64478806412792	9.56765717323812	9.612550260123234	0.016367705606627134	6.0	6.0	6.0	6.0	0.0	6.0	6.0	6.0	6.0	0.0	1	0	0	0	1	0	1	1	1	1	0	1	0	1	1	0	9
0101110011111011	9.556229001228939	9.478540477039477	9.390976157754652	9.475248545341023	0.03375216827557091	7.849573606201575	7.911320378123307	8.027042649248159	7.9293122111910135	0.03677996477436181	6.0	6.0	6.0	6.0	0.0	0	1	0	1	1	1	0	0	1	1	1	1	1	0	1	1	11
0001111101110011	9.666785337075824	9.451985011710633	9.345890256207232	9.488220201664562	0.06674348279627894	6.0	6.0	6.0	6.0	0.0	6.0	6.0	6.0	6.0	0.0	0	0	0	1	1	1	1	1	0	1	1	1	0	0	1	1	10
1111101110111101	9.35659582975623	9.382824394148047	9.357101984688894	9.36550740286439	0.006123352683819545	6.0	6.0	6.0	6.0	0.0	6.0	6.0	6.0	6.0	0.0	1	1	1	1	1	0	1	1	1	0	1	1	1	1	0	1	13
1111000101111101	9.513494086149938	9.540165878367755	9.421942823345486	9.491867595954393	0.025314526440146215	6.0	6.0	6.0	6.0	0.0	6.0	6.0	6.0	6.0	0.0	1	1	1	1	0	0	0	1	0	1	1	1	1	1	0	1	11
1110010111100111	9.498389448119925	9.590791240214793	9.466953548029636	9.518711412121451	0.026279523610268453	6.0	6.0	6.0	6.0	0.0	6.0	6.0	6.0	6.0	0.0	1	1	1	0	0	1	0	1	1	1	1	0	0	1	1	1	11
1101110111010111	9.584598858359064	9.648695216785072	9.543549245848453	9.59228110699753	0.02163400683013691	7.705544709843117	7.539075952525531	7.993202635539809	7.745941099302819	0.09379202370797377	6.0	6.0	6.0	6.0	0.0	1	1	0	1	1	1	0	1	1	1	0	1	0	1	1	1	12
1101101011000111	9.541496771376707	9.547459559448614	9.43940581011372	9.509454046979679	0.02479568284473397	6.945489798938747	6.849656009054563	6.947216715444897	6.91412084114607	0.022794485782729624	6.0	6.0	6.0	6.0	0.0	1	1	0	1	1	0	1	0	1	1	0	0	0	1	1	1	10
1100010111100011	9.587389756713133	9.513627130311754	9.510044182402359	9.537020356475749	0.017823284111594624	6.0	6.0	6.0	6.0	0.0	6.0	6.0	6.0	6.0	0.0	1	1	0	0	0	1	0	1	1	1	1	0	0	0	1	1	9
1011011111110011	9.60859234911003	9.53454663837764	9.508026823050132	9.5503886035126	0.021278244572132694	6.406234513604912	6.307103377870632	6.0	6.237779297158514	0.08646867557665992	6.0	6.0	6.0	6.0	0.0	1	0	1	1	0	1	1	1	1	1	1	1	0	0	1	1	12
1011010101010001	9.565794238818617	9.491579418086774	9.463927210729716	9.507100289211701	0.02150540991345235	6.0	6.0	6.0	6.0	0.0	6.0	6.0	6.0	6.0	0.0	1	0	1	1	0	1	0	1	0	1	0	1	0	0	0	1	8
1011010011001110	9.605617846764988	9.54262729138719	9.436434298475513	9.528226478875895	0.03490774938723802	6.682751637053872	6.912399379724586	6.292755960584572	6.629302325787677	0.12788804568645484	6.0	6.0	6.0	6.0	0.0	1	0	1	1	0	1	0	0	1	1	0	0	1	1	1	0	9
1111111111101001	9.596588480777607	9.602508124322156	9.564314874313633	9.58780382647113	0.00839204683034877	7.951669306061111	7.779404179023326	7.746887796727027	7.8259870939371545	0.04492835521265718	6.0	6.0	6.0	6.0	0.0	1	1	1	1	1	1	1	1	1	1	1	0	1	0	0	1	13
1111110111111100	9.64429048240772	9.539851288033505	9.528281059008268	9.570807609816498	0.026087247756702587	8.853671683917861	8.701040416035378	8.580661585275768	8.711791228409668	0.055857427833684664	6.0	6.0	6.16949141291508	6.05649713763836	0.03994950914171402	1	1	1	1	1	1	0	1	1	1	1	1	1	1	0	0	13
1111101111100101	9.542265982887196	9.53061509663733	9.548739346208755	9.540540141911094	0.003749577774850588	7.449811147065509	7.3778400714828765	7.400886143672387	7.4095124540735915	0.015004270800251487	6.0	6.0	6.0	6.0	0.0	1	1	1	1	1	0	1	1	1	1	1	0	0	1	0	1	12
1111101110110000	9.533788866716227	9.34029122409632	9.441643662216556	9.438574584343035	0.03951244288008222	6.0	6.0	6.0	6.0	0.0	6.0	6.0	6.0	6.0	0.0	1	1	1	1	1	0	1	1	1	0	1	1	0	0	0	0	10
1111100101110011	9.535871449355142	9.565514707038	9.496751683836358	9.532712613409833	0.014080554104594164	6.0	6.0	6.0	6.0	0.0	6.0	6.0	6.0	6.0	0.0	1	1	1	1	1	0	0	1	0	1	1	1	0	0	1	1	11
1101110110010011	9.484814752170935	9.491420981542113	9.432183902501963	9.46947321207167	0.013252547068175592	6.0	6.0	6.0	6.0	0.0	6.0	6.0	6.0	6.0	0.0	1	1	0	1	1	1	0	1	1	0	0	1	0	0	1	1	10
1101110011100011	9.594774955195579	9.57639075422102	9.586740234460688	9.585968647959096	0.0037625616421378704	7.4780747348292325	7.850944759903475	7.534495465449429	7.621171653394046	0.08204936021198309	6.0	6.0	6.0	6.0	0.0	1	1	0	1	1	1	0	0	1	1	1	0	0	0	1	1	10
1101101101010011	9.382704289809793	9.468152017234434	9.367104783220302	9.405987030088175	0.02220810802248319	6.0	6.0	6.0	6.0	0.0	6.0	6.0	6.0	6.0	0.0	1	1	0	1	1	0	1	1	0	1	0	1	0	0	1	1	10
1101100111010001	9.551990513719092	9.502267091747845	9.432426997823798	9.495561534430244	0.024520678204037506	7.1924925457753845	7.098476828540799	7.256923906330661	7.182631093548949	0.03253025590392047	6.0	6.0	6.0	6.0	0.0	1	1	0	1	1	0	0	1	1	1	0	1	0	0	0	1	9
1101010101011111	9.506428488785682	9.591920255684766	9.43869739264995	9.512348712373466	0.031346446435078695	6.0	6.0	6.0	6.0	0.0	6.0	6.0	6.0	6.0	0.0	1	1	0	1	0	1	0	1	0	1	0	1	1	1	1	1	11
1100010011010001	9.486199987232895	9.466895207990756	9.482231451239024	9.47844221548756	0.004162077928192213	6.0	6.0	6.0	6.0	0.0	6.0	6.0	6.0	6.0	0.0	1	1	0	0	0	1	0	0	1	1	0	1	0	0	0	1	7
1001011101111101	9.537527228004368	9.56235191267975	9.433573875827706	9.51115100550394	0.027891828340067006	6.0	6.0	6.0	6.0	0.0	6.0	6.0	6.0	6.0	0.0	1	0	0	1	0	1	1	1	0	1	1	1	1	1	0	1	11
1111101110010011	9.382529742359301	9.375487800922652	9.317297599331416	9.358438380871123	0.014616316020533978	6.0	6.0	6.0	6.0	0.0	6.0	6.0	6.0	6.0	0.0	1	1	1	1	1	0	1	1	1	0	0	1	0	0	1	1	11
1111011011011011	9.566116058804356	9.604240408875619	9.514970523522178	9.561775663734052	0.018286640751191536	6.96579428375362	6.837462753414707	6.0	6.601085679056109	0.21412427878630816	6.0	6.0	6.0	6.0	0.0	1	1	1	1	0	1	1	0	1	1	0	1	1	0	1	1	12
1111000101001101	9.473228729505239	9.452778818281367	9.484370037325547	9.47012586170405	0.0065411788134618	6.0	6.0	6.0	6.0	0.0	6.0	6.0	6.0	6.0	0.0	1	1	1	1	0	0	0	1	0	1	0	0	1	1	0	1	9
1111000010010011	9.344254792977004	9.340049833902317	9.365380653434674	9.349895093437999	0.005541846059947356	6.0	6.0	6.0	6.0	0.0	6.0	6.0	6.0	6.0	0.0	1	1	1	1	0	0	0	0	1	0	0	1	0	0	1	1	8
1101111111111011	9.586561075190003	9.558785639331667	9.637733089535393	9.59435993468569	0.016349269252235343	7.003317015849223	7.2955172451089965	7.398036212944768	7.232290157967662	0.08361524935702142	6.0	6.0	6.0	6.0	0.0	1	1	0	1	1	1	1	1	1	1	1	1	1	0	1	1	14
1011111101010001	9.556109149922849	9.530519458467259	9.574596217776383	9.553741608722163	0.009035984693632164	6.0	6.0	6.0	6.0	0.0	6.0	6.0	6.0	6.0	0.0	1	0	1	1	1	1	1	1	0	1	0	1	0	0	0	1	10
1011000011011111	9.560363682214499	9.486750132084591	9.462049459536292	9.503054424611793	0.020879791112119475	7.140965551608293	7.140678008556723	6.741086580797037	7.007576713654018	0.09421850831343233	6.0	6.0	6.0	6.0	0.0	1	0	1	1	0	0	0	0	1	1	0	1	1	1	1	1	10
1001111001010001	9.72956177032407	9.485227309244127	9.545009647328275	9.586599575632158	0.05199699321442867	6.0	6.0	6.0	6.0	0.0	6.0	6.0	6.0	6.0	0.0	1	0	0	1	1	1	1	0	0	1	0	1	0	0	0	1	8
1001110111011010	9.626714519306745	9.612131032977652	9.531783494931858	9.590209682405417	0.020870170321136285	6.7762271618367365	6.90631936579993	7.118888546413832	6.933811691350166	0.07061760532755873	6.0	6.0	6.0	6.0	0.0	1	0	0	1	1	1	0	1	1	1	0	1	1	0	1	0	10
0111010101011011	9.548648360342519	9.469359177431317	9.345963400781187	9.45465697951834	0.04169814979048604	6.0	6.0	6.0	6.0	0.0	6.0	6.0	6.0	6.0	0.0	0	1	1	1	0	1	0	1	0	1	0	1	1	0	1	1	10
0101010001101011	9.559057913988196	9.453848942921283	9.424976767659164	9.479294541522881	0.02880985744605509	6.0	6.0	6.0	6.0	0.0	6.0	6.0	6.0	6.0	0.0	0	1	0	1	0	1	0	0	0	1	1	0	1	0	1	1	8
0010010001001011	9.527014715312387	9.425646412150638	9.313288119482296	9.421983082315107	0.04364598001800515	6.0	6.0	6.0	6.0	0.0	6.0	6.0	6.0	6.0	0.0	0	0	1	0	0	1	0	0	0	1	0	0	1	0	1	1	6
1111111011010101	9.628052354132118	9.53485908888868	9.580959130571976	9.58129019119759	0.01902335570001951	8.407080789283567	8.360763230740654	8.577714147913849	8.44851938931269	0.04664545939826803	7.816891504886992	7.566112519293529	7.4230948629948	7.602032962391774	0.08138044141118152	1	1	1	1	1	1	1	0	1	1	0	1	0	1	0	1	12
1111111011001011	9.592817287302422	9.534782913984673	9.587993185862802	9.571864462383298	0.013147236163320109	7.5236018936973945	7.346152890322497	7.406452156671842	7.425402313563911	0.036836052390653115	6.0	6.0	6.0	6.0	0.0	1	1	1	1	1	1	1	0	1	1	0	0	1	0	1	1	12
1111111001010111	9.59232564265398	9.55312952789939	9.52586416112418	9.557106443892517	0.013639061718683319	6.0	6.0	6.0	6.0	0.0	6.0	6.0	6.0	6.0	0.0	1	1	1	1	1	1	1	0	0	1	0	1	0	1	1	1	12
1111101111100100	9.554179769150164	9.52931888625435	9.510416889174072	9.531305181526195	0.008960621654686848	7.387988972242671	7.455943468985791	7.399846109155932	7.414592850128131	0.014818643571969981	6.0	6.0	6.0	6.0	0.0	1	1	1	1	1	0	1	1	1	1	1	0	0	1	0	0	11
1101110010001011	9.477845447387411	9.481751840073242	9.405170497905212	9.454922595121955	0.01760808696334422	6.0	6.0	6.0	6.0	0.0	6.0	6.0	6.0	6.0	0.0	1	1	0	1	1	1	0	0	1	0	0	0	1	0	1	1	9
1101100011110101	9.584363963931578	9.549846076214214	9.412179388354868	9.515463142833553	0.03718987675324006	7.289230941056883	7.250116722234477	7.258444317596173	7.265930660295844	0.008411445810961548	6.0	6.0	6.0	6.0	0.0	1	1	0	1	1	0	0	0	1	1	1	1	0	1	0	1	10
1101011111111111	9.609831149173713	9.583429582199829	9.562663665183457	9.585308132185666	0.009650903230870228	6.0	6.0	6.0	6.0	0.0	6.0	6.0	6.0	6.0	0.0	1	1	0	1	0	1	1	1	1	1	1	1	1	1	1	1	14
1101000101010010	9.602901257399672	9.533139922548745	9.594908433466882	9.576983204471766	0.015586566523459102	6.0	6.0	6.0	6.0	0.0	6.0	6.0	6.0	6.0	0.0	1	1	0	1	0	0	0	1	0	1	0	1	0	0	1	0	7
1011011111101111	9.57870448924091	9.594912185604398	9.539543180380312	9.571053285075207	0.01162136953178057	6.0	6.0	6.0	6.0	0.0	6.0	6.0	6.0	6.0	0.0	1	0	1	1	0	1	1	1	1	1	1	0	1	1	1	1	13
1011010110011111	9.458614992972713	9.403042826335156	9.31398429428007	9.391880704529314	0.029785215777537618	6.0	6.0	6.0	6.0	0.0	6.0	6.0	6.0	6.0	0.0	1	0	1	1	0	1	0	1	1	0	0	1	1	1	1	1	11
1001110111101101	9.633672377647231	9.52999911842764	9.575368894538286	9.579680130204386	0.02121703809846257	7.628159204790293	7.795364744170297	7.841039030033984	7.754854326331524	0.045753461552196575	6.0	6.0	6.0	6.0	0.0	1	0	0	1	1	1	0	1	1	1	1	0	1	1	0	1	11
0101110101001111	9.646589501034184	9.517568390033485	9.39749365851741	9.52055051652836	0.050857406046397435	6.0	6.108421593366737	6.0	6.036140531122245	0.025555214632223367	6.0	6.0	6.0	6.0	0.0	0	1	0	1	1	1	0	1	0	1	0	0	1	1	1	1	10
1111111001111011	9.562017395728805	9.586723604212619	9.50728273161677	9.552007910519398	0.01659746670085248	6.0	6.327793320179177	6.0	6.109264440059725	0.07726162650878311	6.0	6.0	6.0	6.0	0.0	1	1	1	1	1	1	1	0	0	1	1	1	1	0	1	1	13
1111110101010101	9.636235957104981	9.48370314920819	9.47753479045456	9.532491298922578	0.03670088041284175	7.2763859139131215	6.202244926577506	6.0	6.492876946830209	0.28007156189864657	6.0	6.0	6.0	6.0	0.0	1	1	1	1	1	1	0	1	0	1	0	1	0	1	0	1	11
1111110010011110	9.482012188010437	9.523778725326046	9.506647978525844	9.504146297287443	0.008571315696340369	6.780737446448502	6.626083137645997	6.499584324167901	6.635468302754134	0.05748598457466674	6.0	6.0	6.0	6.0	0.0	1	1	1	1	1	1	0	0	1	0	0	1	1	1	1	0	11
1111101001101111	9.497077952546805	9.552479666406617	9.416491608354928	9.48868307576945	0.027916671990788396	6.0	6.0	6.0	6.0	0.0	6.0	6.0	6.0	6.0	0.0	1	1	1	1	1	0	1	0	0	1	1	0	1	1	1	1	12
1111011111010000	9.632739304852644	9.57596062512083	9.575837521194089	9.594845817055853	0.013397394657782455	6.238397276657929	6.2199052549085625	6.0	6.152767510522164	0.0541432096703569	6.0	6.0	6.0	6.0	0.0	1	1	1	1	0	1	1	1	1	1	0	1	0	0	0	0	10
1101111111100111	9.602684260992707	9.659666974739787	9.547168062425534	9.60317309938601	0.02296439468758674	7.55448345746418	7.477453603954481	7.573063432391488	7.535000164603383	0.020696251065362794	6.0	6.0	6.0	6.0	0.0	1	1	0	1	1	1	1	1	1	1	1	0	0	1	1	1	13
1101001011010011	9.584574847160733	9.529890020077492	9.44534886365007	9.519937910296099	0.028636375433917154	6.0	6.362002456968648	6.0	6.120667485656216	0.08532479737624084	6.0	6.0	6.0	6.0	0.0	1	1	0	1	0	0	1	0	1	1	0	1	0	0	1	1	9
1101000010101001	9.423866529669938	9.330802749361554	9.38995823429779	9.381542504443095	0.01922817023302965	6.0	6.0	6.0	6.0	0.0	6.0	6.0	6.0	6.0	0.0	1	1	0	1	0	0	0	0	1	0	1	0	1	0	0	1	7
1011111010000101	9.487623854001235	9.46478255307406	9.402922879805113	9.451776428960136	0.017890561784514425	6.0	6.0	6.0	6.0	0.0	6.0	6.0	6.0	6.0	0.0	1	0	1	1	1	1	1	0	1	0	0	0	0	1	0	1	9
1011110101010011	9.559457079763805	9.56265315383108	9.531925603793537	9.551345279129473	0.006896817683731324	6.0	6.0	6.0	6.0	0.0	6.0	6.0	6.0	6.0	0.0	1	0	1	1	1	1	0	1	0	1	0	1	0	0	1	1	10
1011010111010101	9.55525674398364	9.43588652588233	9.506522194274241	9.49922182138007	0.02450266592871107	7.444188417423744	7.044205521824088	7.122388546712853	7.203594161986895	0.08654704227287627	6.085052924445468	6.0	6.0	6.028350974815155	0.0200471665450458	1	0	1	1	0	1	0	1	1	1	0	1	0	1	0	1	10
1001101111011101	9.570666988507467	9.528064662432929	9.437240922806216	9.511990857915537	0.027822066020445287	7.018778911711153	6.9302034156335806	6.018192285837038	6.655724871060591	0.2261257955735837	6.0	6.0	6.0	6.0	0.0	1	0	0	1	1	0	1	1	1	1	0	1	1	1	0	1	11
0101111001011011	9.584251986965935	9.57752895107962	9.337529598009064	9.499770178684871	0.05737712133536591	6.0	6.0	6.0	6.0	0.0	6.0	6.0	6.0	6.0	0.0	0	1	0	1	1	1	1	0	0	1	0	1	1	0	1	1	10
1111111001010101	9.652354599432883	9.544465399498561	9.521881053560316	9.572900350830587	0.028467075678407863	6.0	6.0	6.0	6.0	0.0	6.0	6.0	6.0	6.0	0.0	1	1	1	1	1	1	1	0	0	1	0	1	0	1	0	1	11
1111110111100111	9.585501557746484	9.564444813543508	9.546282093279897	9.565409488189964	0.008012901535873328	8.34844318609891	8.361519532950089	8.431798573591452	8.380587097546817	0.018301681028190478	6.0	6.0	6.0	6.0	0.0	1	1	1	1	1	1	0	1	1	1	1	0	0	1	1	1	13
1111101010110001	9.39655960849936	9.335457214195527	9.361985162620853	9.36466732843858	0.012508471512809398	6.0	6.0	6.0	6.0	0.0	6.0	6.0	6.0	6.0	0.0	1	1	1	1	1	0	1	0	1	0	1	1	0	0	0	1	10
1111100111011111	9.650734826258343	9.542044865830789	9.448435648183137	9.547071780090755	0.04133237585458642	8.242061307064198	8.04222539313557	8.316448603330707	8.200245101176826	0.057895075436147	6.0	6.0	6.0	6.0	0.0	1	1	1	1	1	0	0	1	1	1	0	1	1	1	1	1	13
1111100101011011	9.518827260105803	9.582070498580077	9.391478384863593	9.497458714516492	0.03963121561803939	6.0	6.0	6.0	6.0	0.0	6.0	6.0	6.0	6.0	0.0	1	1	1	1	1	0	0	1	0	1	0	1	1	0	1	1	11
1101111111010111	9.591282776105967	9.589157303126713	9.459419188019837	9.54661975575084	0.030833109012616114	7.331053445613509	7.2652135274997365	7.335148900369756	7.310471957827667	0.016023094396454874	6.0	6.0	6.0	6.0	0.0	1	1	0	1	1	1	1	1	1	1	0	1	0	1	1	1	13
1101111010111001	9.433318794600881	9.447413792771957	9.483788192719873	9.454840260030904	0.010631355734998158	6.0	6.0	6.0	6.0	0.0	6.0	6.0	6.0	6.0	0.0	1	1	0	1	1	1	1	0	1	0	1	1	1	0	0	1	11
1101010011100101	9.54921323471149	9.4519676701191	9.570110300068553	9.523763734966382	0.025739651742012683	6.654751887464707	7.028220599209418	7.1236445628052225	6.935539016493116	0.10116611099086457	6.0	6.0	6.0	6.0	0.0	1	1	0	1	0	1	0	0	1	1	1	0	0	1	0	1	9
1101001111101011	9.604832199436217	9.519351322164377	9.493168753080887	9.539117424893826	0.023840460796094698	6.824135516961701	6.745380251070904	6.178620802238228	6.582712190090278	0.1437694828991473	6.0	6.0	6.0	6.0	0.0	1	1	0	1	0	0	1	1	1	1	1	0	1	0	1	1	11
1001111011011011	9.587309719611948	9.609892102978671	9.445494350832009	9.547565391140877	0.03638077322325446	6.985412100548433	7.289655773664459	7.062326501982981	7.112464792065292	0.06458384635116625	6.0	6.0	6.0	6.0	0.0	1	0	0	1	1	1	1	0	1	1	0	1	1	0	1	1	11
1000010011111011	9.623400753999137	9.527810294887678	9.555044665221297	9.568751904702703	0.020105141460728324	6.0	6.0	6.0	6.0	0.0	6.0	6.0	6.0	6.0	0.0	1	0	0	0	0	1	0	0	1	1	1	1	1	0	1	1	9
0011100111010111	9.546904465924632	9.392943819717306	9.352565075587323	9.430804453743086	0.04186689297801382	6.306207034379207	6.765234159263911	6.0	6.357147064547706	0.1572376092793228	6.0	6.0	6.0	6.0	0.0	0	0	1	1	1	0	0	1	1	1	0	1	0	1	1	1	10
0011011110111011	9.5025357076775	9.383679203371369	9.220461809345016	9.368892240131295	0.05781495155741672	6.0	6.0	6.0	6.0	0.0	6.0	6.0	6.0	6.0	0.0	0	0	1	1	0	1	1	1	1	0	1	1	1	0	1	1	11
0001010101011101	9.578922989083665	9.51249144724602	9.387168504379188	9.492860980236292	0.03975227881798083	6.0	6.0	6.0	6.0	0.0	6.0	6.0	6.0	6.0	0.0	0	0	0	1	0	1	0	1	0	1	0	1	1	1	0	1	8
1111100011110101	9.507042657926572	9.561675803501227	9.504627976055987	9.524448812494596	0.013170954892552522	8.112363974111737	8.245250018503938	8.017045840211438	8.12488661094237	0.04679191360415603	6.0	6.0	6.0	6.0	0.0	1	1	1	1	1	0	0	0	1	1	1	1	0	1	0	1	11
1101110101010011	9.564904005618773	9.53996917802936	9.483700146895199	9.529524443514443	0.016982029851261685	6.0	6.0	6.0	6.0	0.0	6.0	6.0	6.0	6.0	0.0	1	1	0	1	1	1	0	1	0	1	0	1	0	0	1	1	10
1101110011111101	9.645228916305696	9.593326341398383	9.484185609599336	9.574246955767805	0.03355779560638592	7.734588965991232	7.869602638669307	7.941188630434137	7.848460078364892	0.04282933424097241	6.0	6.0	6.0	6.0	0.0	1	1	0	1	1	1	0	0	1	1	1	1	1	1	0	1	12
1101000111011111	9.474500314896146	9.573006451306217	9.48006364789798	9.509190138033446	0.02259103453555008	6.661827094509174	6.771660382450234	6.584672735220375	6.672720070726594	0.03836249851155538	6.0	6.0	6.0	6.0	0.0	1	1	0	1	0	0	0	1	1	1	0	1	1	1	1	1	11
1101000001111101	9.48647377095156	9.482571842766015	9.44895045153943	9.472665355085669	0.008422229995146207	6.0	6.0	6.0	6.0	0.0	6.0	6.0	6.0	6.0	0.0	1	1	0	1	0	0	0	0	0	1	1	1	1	1	0	1	9
1011101101111110	9.531600606233473	9.45283896840201	9.519384400183537	9.501274658273006	0.01730520616521277	6.0	6.0	6.0	6.0	0.0	6.0	6.0	6.0	6.0	0.0	1	0	1	1	1	0	1	1	0	1	1	1	1	1	1	0	12
1001010101000011	9.582848262062543	9.451058818555593	9.455177083606694	9.496361388074943	0.03058928068204057	6.0	6.0	6.0	6.0	0.0	6.0	6.0	6.0	6.0	0.0	1	0	0	1	0	1	0	1	0	1	0	0	0	0	1	1	7
1001001111011001	9.598457081082868	9.504153028610547	9.461176905198604	9.52126233829734	0.028667658988171533	6.0	6.0	6.0	6.0	0.0	6.0	6.0	6.0	6.0	0.0	1	0	0	1	0	0	1	1	1	1	0	1	1	0	0	1	9
1001000111111010	9.619698357112156	9.491466013315767	9.563882413089257	9.55834892783906	0.026248327226509282	6.005316645383803	6.0	6.0	6.001772215127935	0.0012531453346837384	6.0	6.0	6.0	6.0	0.0	1	0	0	1	0	0	0	1	1	1	1	1	1	0	1	0	9
1111111001001010	9.678104404374917	9.58881193125615	9.596875064857713	9.621263800162927	0.02016347459416526	6.0	6.0	6.0	6.0	0.0	6.0	6.0	6.0	6.0	0.0	1	1	1	1	1	1	1	0	0	1	0	0	1	0	1	0	10
1111110111010110	9.51280086657491	9.54221812066441	9.519468437386989	9.524829141542105	0.006296779220635307	8.867730124000733	8.59898441397406	8.598798579086372	8.688504372353721	0.06336588353066197	6.0	6.0	6.0603705717736185	6.020123523924539	0.014229480228411603	1	1	1	1	1	1	0	1	1	1	0	1	0	1	1	0	12
1111110001010111	9.567596804813236	9.508059248965925	9.587691731474116	9.554449261751094	0.01690649029235304	7.366677663802863	6.812707422506379	6.257864549495128	6.812416545268124	0.22633555254399754	6.0	6.0	6.0	6.0	0.0	1	1	1	1	1	1	0	0	0	1	0	1	0	1	1	1	11
1111101111011011	9.552811085014188	9.49855666449484	9.429006153869267	9.493457967792764	0.025335787518167757	7.631191884008392	7.6551651773717735	7.691765821110266	7.659374294163477	0.012453834497388756	6.0	6.0	6.0	6.0	0.0	1	1	1	1	1	0	1	1	1	1	0	1	1	0	1	1	13
1111011110011111	9.442544039671713	9.39359382773686	9.375704296349664	9.403947387919413	0.014126128144798761	6.0	6.0	6.0	6.0	0.0	6.0	6.0	6.0	6.0	0.0	1	1	1	1	0	1	1	1	1	0	0	1	1	1	1	1	13
1101110101111111	9.483559357186078	9.607478182052317	9.4782754358595	9.523104325032632	0.029850155687561896	6.0	6.0	6.0	6.0	0.0	6.0	6.0	6.0	6.0	0.0	1	1	0	1	1	1	0	1	0	1	1	1	1	1	1	1	13
1101101101110111	9.509754831871758	9.440378768464557	9.39640774145368	9.448847113929999	0.023329792765019414	6.0	6.0	6.0	6.0	0.0	6.0	6.0	6.0	6.0	0.0	1	1	0	1	1	0	1	1	0	1	1	1	0	1	1	1	12
1101101011011001	9.440987615530993	9.498331012673036	9.418010062049007	9.45244289675101	0.016888267022597082	7.019082837089763	6.848775420813547	6.887910891925638	6.91858971660965	0.03641667823645339	6.0	6.0	6.0	6.0	0.0	1	1	0	1	1	0	1	0	1	1	0	1	1	0	0	1	10
1101100010101101	9.459727229211811	9.433441690355249	9.339603492100938	9.410924137222667	0.02578018684855858	6.0	6.0	6.0	6.0	0.0	6.0	6.0	6.0	6.0	0.0	1	1	0	1	1	0	0	0	1	0	1	0	1	1	0	1	9
1101011111110001	9.704873073386317	9.52053443599814	9.5481569630731	9.591188157485853	0.04058724364044589	6.0	6.0	6.0	6.0	0.0	6.0	6.0	6.0	6.0	0.0	1	1	0	1	0	1	1	1	1	1	1	1	0	0	0	1	11
1100110011111101	9.569968525008207	9.688919703033447	9.611381721408144	9.623423316483267	0.024651219365929226	6.0	6.0	6.0	6.0	0.0	6.0	6.0	6.0	6.0	0.0	1	1	0	0	1	1	0	0	1	1	1	1	1	1	0	1	11
1011110001001001	9.625537420552588	9.549811906494343	9.501661755468804	9.559003694171912	0.02549399216978894	6.0	6.0	6.0	6.0	0.0	6.0	6.0	6.0	6.0	0.0	1	0	1	1	1	1	0	0	0	1	0	0	1	0	0	1	8
1011101101110101	9.379794711582619	9.431474191010997	9.446877731388254	9.41938221132729	0.014345120343774173	6.0	6.0	6.0	6.0	0.0	6.0	6.0	6.0	6.0	0.0	1	0	1	1	1	0	1	1	0	1	1	1	0	1	0	1	11
1001110110011101	9.46304331888651	9.483130341120841	9.48236698312831	9.476180214378553	0.004647206978979199	6.0	6.0	6.0	6.0	0.0	6.0	6.0	6.0	6.0	0.0	1	0	0	1	1	1	0	1	1	0	0	1	1	1	0	1	10
1001000111101011	9.591586017908543	9.512310251563663	9.533376631546664	9.545757633672958	0.016763694365256775	6.042329582832696	6.684124889905653	6.0	6.242151490912783	0.15649990013771062	6.0	6.0	6.0	6.0	0.0	1	0	0	1	0	0	0	1	1	1	1	0	1	0	1	1	9
1001000110100101	9.448203468551064	9.291886468621415	9.33110384614	9.357064594437492	0.033201961427692314	6.0	6.0	6.0	6.0	0.0	6.0	6.0	6.0	6.0	0.0	1	0	0	1	0	0	0	1	1	0	1	0	0	1	0	1	7
1001000011100011	9.57099269277968	9.545936279390466	9.47013877544321	9.529022582537785	0.02143763441725052	6.506860465146934	6.277543145947496	6.0	6.26146787036481	0.10361844562788684	6.0	6.0	6.0	6.0	0.0	1	0	0	1	0	0	0	0	1	1	1	0	0	0	1	1	7
1111111001000011	9.556147643239171	9.593940354962756	9.53598368200494	9.562023893402289	0.012011395437038656	6.0	6.0	6.0	6.0	0.0	6.0	6.0	6.0	6.0	0.0	1	1	1	1	1	1	1	0	0	1	0	0	0	0	1	1	10
1111110010101111	9.501830929166667	9.485118108546514	9.400243940765623	9.462397659492934	0.022237892424851732	6.0	6.2338302045150025	6.142978008934818	6.125602737816607	0.048124086434108836	6.0	6.0	6.0	6.0	0.0	1	1	1	1	1	1	0	0	1	0	1	0	1	1	1	1	12
1111101001001101	9.460859511456416	9.449762769724604	9.486330451489724	9.465650910890249	0.007654159749439931	6.0	6.0	6.0	6.0	0.0	6.0	6.0	6.0	6.0	0.0	1	1	1	1	1	0	1	0	0	1	0	0	1	1	0	1	10
1111101001000101	9.409776512179876	9.484299935076068	9.466711755604683	9.453596067620209	0.01590309767267958	6.0	6.0	6.0	6.0	0.0	6.0	6.0	6.0	6.0	0.0	1	1	1	1	1	0	1	0	0	1	0	0	0	1	0	1	9
1111100001000011	9.53328600467329	9.433199435857329	9.471193241788269	9.47922622743963	0.020626548257824704	6.0	6.0	6.0	6.0	0.0	6.0	6.0	6.0	6.0	0.0	1	1	1	1	1	0	0	0	0	1	0	0	0	0	1	1	8
1111010101100011	9.545130300343974	9.484789284363613	9.457117411012016	9.495678998573199	0.018373470815348424	6.0	6.0	6.0	6.0	0.0	6.0	6.0	6.0	6.0	0.0	1	1	1	1	0	1	0	1	0	1	1	0	0	0	1	1	10
1111000101110101	9.592669300615038	9.4369319120927	9.4920346176968	9.50721194346818	0.032239460704539646	6.0	6.0	6.0	6.0	0.0	6.0	6.0	6.0	6.0	0.0	1	1	1	1	0	0	0	1	0	1	1	1	0	1	0	1	10
1011101011001010	9.603324836040574	9.58988017093049	9.484679914802433	9.5592949739245	0.02652277336184468	6.635210283128148	6.529291662450497	6.546658938159593	6.570386961246079	0.02319106459126973	6.0	6.0	6.0	6.0	0.0	1	0	1	1	1	0	1	0	1	1	0	0	1	0	1	0	9
1011011011001101	9.567960145172849	9.549490546005636	9.488354005937518	9.535268232372	0.017009752128356776	6.0	6.0	6.0	6.0	0.0	6.0	6.0	6.0	6.0	0.0	1	0	1	1	0	1	1	0	1	1	0	0	1	1	0	1	10
1011000111101101	9.554957902395687	9.546716075036247	9.575607503854265	9.559093827095401	0.0060760193881069695	6.973302579191962	6.989743702858635	6.704714883666838	6.8892537219058125	0.06533058848502518	6.0	6.0	6.0	6.0	0.0	1	0	1	1	0	0	0	1	1	1	1	0	1	1	0	1	10
1001111001110010	9.693526000071056	9.594129100504857	9.589850117266801	9.625835072614237	0.02394829036821167	6.0	6.0	6.0	6.0	0.0	6.0	6.0	6.0	6.0	0.0	1	0	0	1	1	1	1	0	0	1	1	1	0	0	1	0	9
1001100111110101	9.586181990578387	9.487060113430891	9.452667381542966	9.508636495184081	0.028301039125916368	6.653570886311573	6.655860369013442	6.018450088606544	6.4426271146438525	0.14996995393308643	6.0	6.0	6.0	6.0	0.0	1	0	0	1	1	0	0	1	1	1	1	1	0	1	0	1	10
0111010101111011	9.466221249155426	9.527758706041283	9.421690664844833	9.471890206680513	0.02174362033018291	6.619546277876629	6.64039510460484	6.0	6.419980460827156	0.14854649047881088	6.0	6.0	6.0	6.0	0.0	0	1	1	1	0	1	0	1	0	1	1	1	1	0	1	1	11
1111110001110111	9.529870476692274	9.617918124233132	9.530626859749637	9.559471820225014	0.020664465748353896	7.216842622221581	6.519161012924764	6.893166646686511	6.876390093944285	0.14253712763650012	6.0	6.0	6.0	6.0	0.0	1	1	1	1	1	1	0	0	0	1	1	1	0	1	1	1	12
1111101001010011	9.482058316140733	9.49101802428722	9.464709917216883	9.479262085881611	0.005460361742482455	6.0	6.0	6.0	6.0	0.0	6.0	6.0	6.0	6.0	0.0	1	1	1	1	1	0	1	0	0	1	0	1	0	0	1	1	10
1111011010001001	9.477793421675447	9.353262658207935	9.372781343828956	9.401279141237445	0.027343710749463086	6.0	6.0	6.0	6.0	0.0	6.0	6.0	6.0	6.0	0.0	1	1	1	1	0	1	1	0	1	0	0	0	1	0	0	1	9
1111001011100000	9.625379302111863	9.543920202541404	9.544575736999523	9.571291747217597	0.019123306579436287	6.531611042624223	6.6993130968499495	6.6800071061880875	6.63697708188742	0.03746038349903611	6.0	6.0	6.0	6.0	0.0	1	1	1	1	0	0	1	0	1	1	1	0	0	0	0	0	8
1101110111011101	9.566655491718556	9.560320060828595	9.53471488543776	9.553896812661636	0.006904034691842178	7.828040155588336	8.044984664174944	8.046652032877223	7.973225617546834	0.051331940678090916	6.0	6.0	6.0	6.0	0.0	1	1	0	1	1	1	0	1	1	1	0	1	1	1	0	1	12
1101101001111111	9.531867268299628	9.495715117229953	9.455625764567486	9.494402716699023	0.015569647390568061	6.0	6.0	6.0	6.0	0.0	6.0	6.0	6.0	6.0	0.0	1	1	0	1	1	0	1	0	0	1	1	1	1	1	1	1	12
1011011111101011	9.569604821756892	9.591308489206286	9.477041058446972	9.545984789803382	0.024774620297114733	6.0	6.0	6.0	6.0	0.0	6.0	6.0	6.0	6.0	0.0	1	0	1	1	0	1	1	1	1	1	1	0	1	0	1	1	12
1011000011001101	9.489990599023617	9.463081194596873	9.51223633881483	9.488436044145105	0.010048793720515028	6.855391085877588	6.810159062708245	6.734894519018527	6.800148222534787	0.02484960880623977	6.0	6.0	6.0	6.0	0.0	1	0	1	1	0	0	0	0	1	1	0	0	1	1	0	1	8
1001110011111110	9.583890098669388	9.596663080553212	9.5586343778984	9.579729185707	0.00790074314977648	6.829411230020017	7.2421726639885415	6.816969183872881	6.96285102596048	0.09878776428206378	6.0	6.0	6.0	6.0	0.0	1	0	0	1	1	1	0	0	1	1	1	1	1	1	1	0	11
0111111011001101	9.539256690843674	9.51514078028714	9.407742313821759	9.487379928317523	0.02858323085722587	7.81304748078812	7.90892469762809	7.841653168644898	7.854541782353702	0.020094350158464013	6.0	6.0	6.0	6.0	0.0	0	1	1	1	1	1	1	0	1	1	0	0	1	1	0	1	11
1111111101100001	9.58220647268543	9.52735477278053	9.565170820032188	9.558244021832715	0.011461258261250142	6.0	6.0	6.0	6.0	0.0	6.0	6.0	6.0	6.0	0.0	1	1	1	1	1	1	1	1	0	1	1	0	0	0	0	1	11
1111110010001011	9.525449637590134	9.445324101101484	9.371120932996078	9.4472982238959	0.031509945879635605	6.0	6.0	6.0	6.0	0.0	6.0	6.0	6.0	6.0	0.0	1	1	1	1	1	1	0	0	1	0	0	0	1	0	1	1	10
1111101001110101	9.486817717370846	9.489519598678152	9.475587492800546	9.48397493628318	0.003016260012567763	6.0	6.0	6.0	6.0	0.0	6.0	6.0	6.0	6.0	0.0	1	1	1	1	1	0	1	0	0	1	1	1	0	1	0	1	11
1111011111111010	9.626962481681636	9.574168743787043	9.557163662144225	9.586098295870968	0.014858804695624747	6.78240495077746	6.894949649169767	6.3143242470658825	6.66389294900437	0.12570818411124046	6.0	6.0	6.0	6.0	0.0	1	1	1	1	0	1	1	1	1	1	1	1	1	0	1	0	13
1101110011111011	9.583199951043527	9.55807486499994	9.548234747856533	9.563169854633333	0.007361052325134811	7.575671436562799	7.69986016084821	7.791984270848223	7.689171956086411	0.04431607845902912	6.0	6.0	6.0	6.0	0.0	1	1	0	1	1	1	0	0	1	1	1	1	1	0	1	1	12
1101101011101100	9.659375268627091	9.543781210426502	9.535557056195277	9.57957117841629	0.028264904000618287	7.144257477343028	7.107379461063068	7.057867296665408	7.103168078357168	0.01769706961429692	6.0	6.0	6.0	6.0	0.0	1	1	0	1	1	0	1	0	1	1	1	0	1	1	0	0	10
1101100111010011	9.529739882314027	9.50084162984622	9.434795498891766	9.488459003684005	0.019868761322166105	7.024319094545312	7.00247385361475	6.6167650167065695	6.881185988288877	0.09359321672110935	6.0	6.0	6.0	6.0	0.0	1	1	0	1	1	0	0	1	1	1	0	1	0	0	1	1	10
1101011001111011	9.487451452999547	9.461186030254456	9.475724979260992	9.474787487504999	0.005371642766866909	6.0	6.0	6.0	6.0	0.0	6.0	6.0	6.0	6.0	0.0	1	1	0	1	0	1	1	0	0	1	1	1	1	0	1	1	11
1101010101010011	9.48885935961508	9.599589183957569	9.41100212297513	9.49981688884926	0.038689620653104835	6.0	6.0	6.0	6.0	0.0	6.0	6.0	6.0	6.0	0.0	1	1	0	1	0	1	0	1	0	1	0	1	0	0	1	1	9
1011111111100101	9.586716252298269	9.49045431033714	9.574792977461538	9.550654513365648	0.021422688339753557	7.443608453785237	7.307680706493382	7.64495113519681	7.4654134318251435	0.06927533028904669	6.0	6.0	6.0	6.0	0.0	1	0	1	1	1	1	1	1	1	1	1	0	0	1	0	1	12
1001001011110101	9.649150254371436	9.49600546857859	9.386583604029736	9.51057977565992	0.053843320984889205	6.0	6.0	6.0	6.0	0.0	6.0	6.0	6.0	6.0	0.0	1	0	0	1	0	0	1	0	1	1	1	1	0	1	0	1	9
0101010011111101	9.561548442855463	9.451286317488178	9.437741084111092	9.48352528148491	0.027723571858322135	7.308068308864025	7.32007995217274	7.260557182768878	7.296235147935214	0.01285014781076918	6.0	6.0	6.0	6.0	0.0	0	1	0	1	0	1	0	0	1	1	1	1	1	1	0	1	10
1111110001000011	9.54877939467848	9.535757626592726	9.57212560975771	9.552220877009638	0.007522636952878812	6.0	6.0	6.0	6.0	0.0	6.0	6.0	6.0	6.0	0.0	1	1	1	1	1	1	0	0	0	1	0	0	0	0	1	1	9
1111000011111001	9.597830146939287	9.4732987614543	9.532236333810769	9.534455080734785	0.025431963553558763	7.758001063654747	7.6140448539029	7.582580742425137	7.651542219994262	0.03818291856951468	6.0	6.0	6.0	6.0	0.0	1	1	1	1	0	0	0	0	1	1	1	1	1	0	0	1	10
1101011110010101	9.491964443197274	9.355061852359274	9.383904247133046	9.41031018089653	0.029463352513420204	6.0	6.0	6.0	6.0	0.0	6.0	6.0	6.0	6.0	0.0	1	1	0	1	0	1	1	1	1	0	0	1	0	1	0	1	10
1101001111010010	9.54617382607043	9.510171138837046	9.444932749147632	9.500425904685036	0.020950998805268024	6.0	6.0	6.0	6.0	0.0	6.0	6.0	6.0	6.0	0.0	1	1	0	1	0	0	1	1	1	1	0	1	0	0	1	0	9
1011111011101100	9.673587052079007	9.570844422251392	9.503692865827484	9.58270811338596	0.03493224156854523	7.026643652809389	7.039204691782296	7.173451381682094	7.079766575424593	0.033221672438457125	6.0	6.0	6.0	6.0	0.0	1	0	1	1	1	1	1	0	1	1	1	0	1	1	0	0	11
1001101010110011	9.39159675455458	9.363812178362974	9.28253147013112	9.345980134349558	0.02313833547695559	6.0	6.0	6.0	6.0	0.0	6.0	6.0	6.0	6.0	0.0	1	0	0	1	1	0	1	0	1	0	1	1	0	0	1	1	9
0111011001111101	9.518192884856935	9.450574684729153	9.379082471176464	9.44928334692085	0.02839946438341563	6.0	6.0	6.0	6.0	0.0	6.0	6.0	6.0	6.0	0.0	0	1	1	1	0	1	1	0	0	1	1	1	1	1	0	1	11
0101110111010011	9.612727395211564	9.427080662174623	9.421727933444917	9.487178663610369	0.04440162521653045	7.530304305757711	7.763524784227178	7.948861813706419	7.747563634563769	0.0856238533636037	6.0	6.0	6.0	6.0	0.0	0	1	0	1	1	1	0	1	1	1	0	1	0	0	1	1	10
0101100101110101	9.555946268019737	9.47219433748957	9.39164743127386	9.473262678927723	0.03353948656455405	6.0	6.0	6.0	6.0	0.0	6.0	6.0	6.0	6.0	0.0	0	1	0	1	1	0	0	1	0	1	1	1	0	1	0	1	9
1111011110100111	9.510296372405607	9.460326445627212	9.382162695733554	9.45092850458879	0.026365383700968643	6.0	6.0	6.0	6.0	0.0	6.0	6.0	6.0	6.0	0.0	1	1	1	1	0	1	1	1	1	0	1	0	0	1	1	1	12
1111000111111010	9.612862492219588	9.510401898771931	9.511914169729387	9.545059520240303	0.023973958085736935	7.163939960816506	7.227197856600687	7.246421633952955	7.212519817123383	0.01761812623890497	6.0	6.0	6.0	6.0	0.0	1	1	1	1	0	0	0	1	1	1	1	1	1	0	1	0	11
1111000111010101	9.535247029636409	9.487494482508268	9.510845844453106	9.511195785532594	0.00974823303113328	7.706640700503246	7.786896585001142	7.584954065262579	7.692830450255656	0.04150951211974549	6.0	6.0	6.0	6.0	0.0	1	1	1	1	0	0	0	1	1	1	0	1	0	1	0	1	10
1111000001110010	9.48846541728218	9.54824067850678	9.490715411807127	9.509140502532029	0.013831627042054293	6.0	6.0	6.0	6.0	0.0	6.0	6.0	6.0	6.0	0.0	1	1	1	1	0	0	0	0	0	1	1	1	0	0	1	0	8
1111000001101100	9.4776544680505	9.45755490481391	9.475810518201406	9.470339963688605	0.004535844933849727	6.0	6.0	6.0	6.0	0.0	6.0	6.0	6.0	6.0	0.0	1	1	1	1	0	0	0	0	0	1	1	0	1	1	0	0	8
1110010111100011	9.556104798386748	9.529627952867141	9.501718411813233	9.529150387689041	0.011102858584657874	6.0	6.0	6.0	6.0	0.0	6.0	6.0	6.0	6.0	0.0	1	1	1	0	0	1	0	1	1	1	1	0	0	0	1	1	10
1101010011110110	9.54935405141624	9.510285464017445	9.453933139581533	9.504524218338405	0.019583928647713404	6.8579847571869275	6.690645607636597	6.653182675914709	6.733937680246078	0.04451895810864643	6.0	6.0	6.0	6.0	0.0	1	1	0	1	0	1	0	0	1	1	1	1	0	1	1	0	10
1101000010001111	9.388979158319618	9.37726967568484	9.3884102383402	9.384886357448218	0.0026954065339385397	6.0	6.0	6.0	6.0	0.0	6.0	6.0	6.0	6.0	0.0	1	1	0	1	0	0	0	0	1	0	0	0	1	1	1	1	8
1011111010000011	9.528571715382686	9.479662765746651	9.457596525411358	9.488610335513565	0.01482910230715756	6.0	6.0	6.0	6.0	0.0	6.0	6.0	6.0	6.0	0.0	1	0	1	1	1	1	1	0	1	0	0	0	0	0	1	1	9
1011101001010111	9.566067681662195	9.542102056448156	9.330948046415696	9.479705928175349	0.052820873931286615	6.0	6.0	6.0	6.0	0.0	6.0	6.0	6.0	6.0	0.0	1	0	1	1	1	0	1	0	0	1	0	1	0	1	1	1	10
1011000110011111	9.48569044271983	9.398896203253388	9.326487332627183	9.403691326200134	0.032541390230619444	6.0	6.0	6.0	6.0	0.0	6.0	6.0	6.0	6.0	0.0	1	0	1	1	0	0	0	1	1	0	0	1	1	1	1	1	10
1001111101011011	9.583380383784226	9.561048956157407	9.483695979696357	9.542708439879329	0.021356209118966584	6.0	6.0	6.0	6.0	0.0	6.0	6.0	6.0	6.0	0.0	1	0	0	1	1	1	1	1	0	1	0	1	1	0	1	1	11
1001110001111001	9.664426334101472	9.518895732596262	9.494212523558376	9.559178196752036	0.03755039505727879	6.0	6.0	6.0	6.0	0.0	6.0	6.0	6.0	6.0	0.0	1	0	0	1	1	1	0	0	0	1	1	1	1	0	0	1	9
1000101111010111	9.580727081957868	9.582297594037676	9.545449321535397	9.569491332510314	0.008506177616265289	6.0	6.0	6.0	6.0	0.0	6.0	6.0	6.0	6.0	0.0	1	0	0	0	1	0	1	1	1	1	0	1	0	1	1	1	10
1111110111011101	9.581686492776447	9.5470448711209	9.547870036834864	9.558867133577403	0.008069619882674154	8.939928389428768	8.798613494671024	8.769528872347383	8.836023585482392	0.037212531550268664	7.481434188069452	7.615781365837202	7.486844423051102	7.528019992319252	0.031047978119777418	1	1	1	1	1	1	0	1	1	1	0	1	1	1	0	1	13
1111110010011001	9.53277001111178	9.480930569159279	9.433157204851938	9.482285928374331	0.02033902464758965	6.825654181296702	6.857446876707625	6.711050505913709	6.7980505213060125	0.03143630035237563	6.0	6.0	6.0	6.0	0.0	1	1	1	1	1	1	0	0	1	0	0	1	1	0	0	1	10
1111110010001001	9.519113481164073	9.463156092594453	9.400185565881186	9.460818379879903	0.024290124652950395	6.0	6.0	6.0	6.0	0.0	6.0	6.0	6.0	6.0	0.0	1	1	1	1	1	1	0	0	1	0	0	0	1	0	0	1	9
1111101110111111	9.411024369103542	9.403442588190423	9.337866049348806	9.384111002214256	0.01642314220644892	6.0	6.0	6.0	6.0	0.0	6.0	6.0	6.0	6.0	0.0	1	1	1	1	1	0	1	1	1	0	1	1	1	1	1	1	14
1111011101111101	9.502817607922543	9.561270615646915	9.491036494789297	9.518374906119584	0.01535540121344061	6.0	6.0	6.0	6.0	0.0	6.0	6.0	6.0	6.0	0.0	1	1	1	1	0	1	1	1	0	1	1	1	1	1	0	1	13
1101100001110111	9.437370572972087	9.491109953719855	9.476317791408306	9.468266106033417	0.01133286142758122	6.0	6.0	6.0	6.0	0.0	6.0	6.0	6.0	6.0	0.0	1	1	0	1	1	0	0	0	0	1	1	1	0	1	1	1	10
1101011110100111	9.4508635618776	9.512191277959216	9.31123918988933	9.42476467657538	0.0420442213338639	6.0	6.0	6.0	6.0	0.0	6.0	6.0	6.0	6.0	0.0	1	1	0	1	0	1	1	1	1	0	1	0	0	1	1	1	11
1011111101110110	9.669561088310743	9.624338246383152	9.593252101218386	9.629050478637428	0.0156653504449526	6.0	6.0	6.0	6.0	0.0	6.0	6.0	6.0	6.0	0.0	1	0	1	1	1	1	1	1	0	1	1	1	0	1	1	0	12
1011110010101101	9.523098628053935	9.49578116859885	9.433279068673038	9.484052955108607	0.018797391466190038	6.0	6.0	6.0	6.0	0.0	6.0	6.0	6.0	6.0	0.0	1	0	1	1	1	1	0	0	1	0	1	0	1	1	0	1	10
1001110111000011	9.60649170267658	9.55472437811118	9.528682684747029	9.563299588511596	0.016169474805163328	7.394815173689312	7.446094219924466	7.758141789842298	7.533017061152026	0.0802789332542049	6.0	6.0	6.0	6.0	0.0	1	0	0	1	1	1	0	1	1	1	0	0	0	0	1	1	9
1001010111111010	9.51304502833408	9.57611688476606	9.501037993267582	9.530066635455908	0.016464665797384863	6.3222846028166435	6.301454132018213	6.0	6.2079129116116185	0.07363118818310697	6.0	6.0	6.0	6.0	0.0	1	0	0	1	0	1	0	1	1	1	1	1	1	0	1	0	10
0101010101101011	9.56709445568478	9.5768553205114	9.456142485575947	9.533364087257375	0.02737456375672132	6.0	6.0	6.0	6.0	0.0	6.0	6.0	6.0	6.0	0.0	0	1	0	1	0	1	0	1	0	1	1	0	1	0	1	1	9
0101000111110011	9.586542242283636	9.497982371274864	9.435203151521225	9.506575921693242	0.031041013003748303	6.671942577976918	6.569716444240984	6.724350999535768	6.6553366739178905	0.03210601828322624	6.0	6.0	6.0	6.0	0.0	0	1	0	1	0	0	0	1	1	1	1	1	0	0	1	1	9
1111110001111101	9.591354536583674	9.521006499800373	9.493959248711803	9.53544009503195	0.020525216313894243	7.025815838541819	6.913493955457669	6.931736353747676	6.957015382582388	0.024608004554791986	6.0	6.0	6.0	6.0	0.0	1	1	1	1	1	1	0	0	0	1	1	1	1	1	0	1	12
1111010111110111	9.517430181160536	9.500268672810996	9.491965229944187	9.503221361305238	0.005301803342901274	8.115628120218409	8.044145241249733	8.03852530653161	8.066099555999918	0.017548527581717908	6.0	6.0	6.0	6.0	0.0	1	1	1	1	0	1	0	1	1	1	1	1	0	1	1	1	13
1111010111011001	9.55274079775811	9.512901402948854	9.497900453708931	9.521180884805299	0.0115706395582128	7.972137057018711	8.113259002732189	8.040506795089598	8.041967618280166	0.02881102622777447	6.0	6.0	6.0	6.0	0.0	1	1	1	1	0	1	0	1	1	1	0	1	1	0	0	1	11
1111010001001101	9.502917343526617	9.50700633990596	9.517511383982363	9.509145022471646	0.0030734610388389967	6.0	6.0	6.0	6.0	0.0	6.0	6.0	6.0	6.0	0.0	1	1	1	1	0	1	0	0	0	1	0	0	1	1	0	1	9
1101011110101001	9.41050626175306	9.424220469372397	9.373305164993461	9.402677298706307	0.010755320790121412	6.0	6.0	6.0	6.0	0.0	6.0	6.0	6.0	6.0	0.0	1	1	0	1	0	1	1	1	1	0	1	0	1	0	0	1	10
1101010011111111	9.537199153831887	9.531734604489467	9.563281022896076	9.544071593739142	0.0068825498094862185	7.157988352359418	7.135059591968907	6.988112319016204	7.093720087781509	0.0376301798891773	6.0	6.0	6.0	6.0	0.0	1	1	0	1	0	1	0	0	1	1	1	1	1	1	1	1	12
1101000101110111	9.42376739122959	9.496337489856517	9.520080073003456	9.480061651363188	0.020484589153044408	6.0	6.0	6.0	6.0	0.0	6.0	6.0	6.0	6.0	0.0	1	1	0	1	0	0	0	1	0	1	1	1	0	1	1	1	10
1001111001001111	9.583453087707902	9.555697780383133	9.539771071372078	9.559640646487706	0.009024866412951575	6.0	6.0	6.0	6.0	0.0	6.0	6.0	6.0	6.0	0.0	1	0	0	1	1	1	1	0	0	1	0	0	1	1	1	1	10
1001010001011101	9.496627782025444	9.521704795971221	9.362561479966438	9.460298019321035	0.034932166410699045	6.0	6.0	6.0	6.0	0.0	6.0	6.0	6.0	6.0	0.0	1	0	0	1	0	1	0	0	0	1	0	1	1	1	0	1	8
1001010001010110	9.479107204676296	9.535039333471252	9.436872763787855	9.483673100645134	0.020103086020766277	6.0	6.0	6.0	6.0	0.0	6.0	6.0	6.0	6.0	0.0	1	0	0	1	0	1	0	0	0	1	0	1	0	1	1	0	7
0111000001111101	9.52240636952252	9.405336229063588	9.465949441019909	9.464564013202006	0.02390186186767138	6.0	6.0	6.0	6.0	0.0	6.0	6.0	6.0	6.0	0.0	0	1	1	1	0	0	0	0	0	1	1	1	1	1	0	1	9
0101101011110011	9.534499448158332	9.466382362452542	9.409668907874376	9.470183572828416	0.02551634393592111	6.771900916367412	6.9241665241444	7.080949598185433	6.925672346232415	0.06308654446933026	6.0	6.0	6.0	6.0	0.0	0	1	0	1	1	0	1	0	1	1	1	1	0	0	1	1	10
0101010111101101	9.55833283854887	9.47384890251552	9.471315360668003	9.501165700577465	0.020218250651554682	7.390309457866268	7.228489495479362	7.1366126955778055	7.251803882974478	0.05243755380945425	6.0	6.0	6.0	6.0	0.0	0	1	0	1	0	1	0	1	1	1	1	0	1	1	0	1	10
0100010011001101	9.601231391117686	9.477687932087766	9.516224108000252	9.531714477068569	0.025806040047741556	6.0	6.0	6.0	6.0	0.0	6.0	6.0	6.0	6.0	0.0	0	1	0	0	0	1	0	0	1	1	0	0	1	1	0	1	7
1111111010001111	9.537768444137443	9.560234342860326	9.502818843610694	9.53360721020282	0.011811871072605486	6.0	6.0	6.0	6.0	0.0	6.0	6.0	6.0	6.0	0.0	1	1	1	1	1	1	1	0	1	0	0	0	1	1	1	1	12
1111101011100111	9.497025112018974	9.555207707410094	9.5043498246686	9.518860881365889	0.012937231005033899	7.495844344707727	7.566278975790924	7.507869824779582	7.523331048426077	0.015381517000617627	6.0	6.0	6.0	6.0	0.0	1	1	1	1	1	0	1	0	1	1	1	0	0	1	1	1	12
1111101001110010	9.53896068203126	9.548272239846288	9.471642658886703	9.519625193588084	0.017070535065391402	6.0	6.0	6.0	6.0	0.0	6.0	6.0	6.0	6.0	0.0	1	1	1	1	1	0	1	0	0	1	1	1	0	0	1	0	10
1111000001011010	9.557550862274448	9.56470738900044	9.576740712932649	9.566332988069178	0.003959051260934165	6.0	6.0	6.0	6.0	0.0	6.0	6.0	6.0	6.0	0.0	1	1	1	1	0	0	0	0	0	1	0	1	1	0	1	0	8
1101111111010110	9.649792551421076	9.496134862131427	9.55947034237102	9.568465918641174	0.031526078262772275	7.238618361909273	7.172361909376048	7.07586678695568	7.162282352747	0.03341211577618566	6.0	6.0	6.0	6.0	0.0	1	1	0	1	1	1	1	1	1	1	0	1	0	1	1	0	12
1101101111010110	9.646203602822288	9.53923608003134	9.465891356394042	9.550443679749224	0.03701876612291238	7.108750712509122	6.969328749084054	6.926773600518242	7.001617687370473	0.038860539055026365	6.0	6.0	6.0	6.0	0.0	1	1	0	1	1	0	1	1	1	1	0	1	0	1	1	0	11
1101100111101111	9.546746769589976	9.492604641333292	9.501835494561156	9.513728968494808	0.011824646257560606	7.073235415391183	7.2104478302261565	7.362875478029148	7.2155195745488285	0.05914971599549587	6.0	6.0	6.0	6.0	0.0	1	1	0	1	1	0	0	1	1	1	1	0	1	1	1	1	12
1101011001000001	9.468662788418184	9.500760440377713	9.401566487570886	9.45699657212226	0.0206637182857547	6.0	6.0	6.0	6.0	0.0	6.0	6.0	6.0	6.0	0.0	1	1	0	1	0	1	1	0	0	1	0	0	0	0	0	1	7
1100001111001111	9.558767618498537	9.536487183285825	9.431496996799467	9.50891726619461	0.02774745643967304	6.0	6.0	6.0	6.0	0.0	6.0	6.0	6.0	6.0	0.0	1	1	0	0	0	0	1	1	1	1	0	0	1	1	1	1	10
1011110101001011	9.62783173235424	9.572170785414633	9.396945965248179	9.532316161005683	0.04919070487758564	6.0	6.0	6.0	6.0	0.0	6.0	6.0	6.0	6.0	0.0	1	0	1	1	1	1	0	1	0	1	0	0	1	0	1	1	10
1001110001011101	9.611000998044188	9.550790847440394	9.478948270400286	9.546913371961622	0.02698998836487033	6.0	6.0	6.0	6.0	0.0	6.0	6.0	6.0	6.0	0.0	1	0	0	1	1	1	0	0	0	1	0	1	1	1	0	1	9
1001101011110101	9.566240988145386	9.49575860426306	9.392449050685695	9.484816214364715	0.03568545759833155	6.84538978625067	6.881979042704366	6.54092574703056	6.756098191995199	0.07644069512374056	6.0	6.0	6.0	6.0	0.0	1	0	0	1	1	0	1	0	1	1	1	1	0	1	0	1	10
1000010111110011	9.623298785214397	9.6109899160923	9.51808316165953	9.584123954322076	0.023483741845474363	6.0	6.0	6.0	6.0	0.0	6.0	6.0	6.0	6.0	0.0	1	0	0	0	0	1	0	1	1	1	1	1	0	0	1	1	9
0111000111011111	9.557083821287804	9.398649239235242	9.269211417389405	9.408314825970818	0.05886099147818241	7.127624258765372	7.125411368075841	7.213054648032014	7.155363424957742	0.02040192856960269	6.0	6.0	6.0	6.0	0.0	0	1	1	1	0	0	0	1	1	1	0	1	1	1	1	1	11
0101011110011101	9.31574595470315	9.24941423112226	9.271165454812804	9.278775213546071	0.01380462307397286	6.0	6.0	6.0	6.0	0.0	6.0	6.0	6.0	6.0	0.0	0	1	0	1	0	1	1	1	1	0	0	1	1	1	0	1	10
0100101111101111	9.675992740100737	9.579406662611968	9.536633266713626	9.59734422314211	0.029144990318556906	6.0	6.0	6.0	6.0	0.0	6.0	6.0	6.0	6.0	0.0	0	1	0	0	1	0	1	1	1	1	1	0	1	1	1	1	11
1111110110001111	9.518230762688033	9.451580119612817	9.40173232222783	9.457181068176226	0.0238624517670976	6.0	6.354606063673043	6.0	6.118202021224348	0.08358145075769251	6.0	6.0	6.0	6.0	0.0	1	1	1	1	1	1	0	1	1	0	0	0	1	1	1	1	12
1111110010100011	9.51902151376332	9.535540977773037	9.446525008479767	9.500362500005375	0.019330803540461322	6.0	6.340108500811667	6.0	6.113369500270555	0.08016434242103997	6.0	6.0	6.0	6.0	0.0	1	1	1	1	1	1	0	0	1	0	1	0	0	0	1	1	10
1111100111101011	9.544750439167323	9.531860143003591	9.518019320101214	9.531543300757376	0.005457616595003923	7.414401582002909	7.453803826719437	7.5001883770284214	7.456131261916923	0.017530479486388854	6.0	6.0	6.0	6.0	0.0	1	1	1	1	1	0	0	1	1	1	1	0	1	0	1	1	12
1111011001110000	9.510279328620527	9.502331135434083	9.551758058208527	9.521456174087712	0.010835486296468359	6.0	6.0	6.0	6.0	0.0	6.0	6.0	6.0	6.0	0.0	1	1	1	1	0	1	1	0	0	1	1	1	0	0	0	0	9
1111000101010001	9.460520684841311	9.498110884954189	9.418248605957784	9.45896005858443	0.01631115450318259	6.0	6.0	6.0	6.0	0.0	6.0	6.0	6.0	6.0	0.0	1	1	1	1	0	0	0	1	0	1	0	1	0	0	0	1	8
1111000001110111	9.490910438508696	9.529197674773174	9.495531246209909	9.505213119830593	0.00853211699792976	6.0	6.0	6.0	6.0	0.0	6.0	6.0	6.0	6.0	0.0	1	1	1	1	0	0	0	0	0	1	1	1	0	1	1	1	10
1100110111010111	9.592426565831778	9.587810801411749	9.590297245832437	9.590178204358656	0.0009431285216113901	6.0	6.0	6.0	6.0	0.0	6.0	6.0	6.0	6.0	0.0	1	1	0	0	1	1	0	1	1	1	0	1	0	1	1	1	11
1100010011111111	9.48186481031258	9.512454015608917	9.4711347978361	9.488484541252532	0.008752952526884673	6.0	6.0	6.0	6.0	0.0	6.0	6.0	6.0	6.0	0.0	1	1	0	0	0	1	0	0	1	1	1	1	1	1	1	1	11
1001111011110101	9.679735756644114	9.575610163262533	9.528554375773464	9.594633431893369	0.03158418919475339	7.066764347463157	7.191627439585166	7.049632757155467	7.10267484806793	0.03164331287924253	6.0	6.0	6.0	6.0	0.0	1	0	0	1	1	1	1	0	1	1	1	1	0	1	0	1	11
1001110111111100	9.597412636462511	9.58413356826675	9.463411423422368	9.548319209383877	0.03014156183937426	7.210776277840649	7.213706874755986	7.270745309526303	7.231742820707647	0.013802431549713383	6.0	6.0	6.0	6.0	0.0	1	0	0	1	1	1	0	1	1	1	1	1	1	1	0	0	11
1001110101011011	9.558648256942046	9.654917866136126	9.490883313983533	9.568149812353901	0.03365150626001966	6.0	6.0	6.0	6.0	0.0	6.0	6.0	6.0	6.0	0.0	1	0	0	1	1	1	0	1	0	1	0	1	1	0	1	1	10
1001110011111111	9.584024540156078	9.539733710030967	9.388101230111744	9.503953160099597	0.041945742075776796	7.212809920885618	7.592869598430281	7.545952159436675	7.450543892917525	0.08459550087916448	6.0	6.0	6.0	6.0	0.0	1	0	0	1	1	1	0	0	1	1	1	1	1	1	1	1	12
0110010101010011	9.439820514000909	9.489267618532876	9.266617781620702	9.398568638051495	0.04773106155196305	6.0	6.0	6.0	6.0	0.0	6.0	6.0	6.0	6.0	0.0	0	1	1	0	0	1	0	1	0	1	0	1	0	0	1	1	8
0010010011011001	9.54897352370502	9.461348724041931	9.412035826465722	9.474119358070892	0.028314601802564378	6.0	6.0	6.0	6.0	0.0	6.0	6.0	6.0	6.0	0.0	0	0	1	0	0	1	0	0	1	1	0	1	1	0	0	1	7
1111011011000011	9.542813835696759	9.536037919891843	9.570884126756647	9.549911960781749	0.0075426793206815005	6.0	6.0	6.0	6.0	0.0	6.0	6.0	6.0	6.0	0.0	1	1	1	1	0	1	1	0	1	1	0	0	0	0	1	1	10
1111010111010111	9.594952280876141	9.541012704705793	9.442459415879268	9.526141467153735	0.031568401259503	7.875365910382889	7.898200715354439	7.974654550157794	7.916073725298374	0.02122946796487427	6.0	6.0	6.0	6.0	0.0	1	1	1	1	0	1	0	1	1	1	0	1	0	1	1	1	12
1111000110001101	9.313182989140603	9.289233470388737	9.289180791434589	9.297199083654643	0.005651174209933958	6.0	6.0	6.0	6.0	0.0	6.0	6.0	6.0	6.0	0.0	1	1	1	1	0	0	0	1	1	0	0	0	1	1	0	1	9
1101111101011011	9.602335062923313	9.624765479582608	9.54333448220618	9.590145008237368	0.01717168167053296	6.0	6.0	6.0	6.0	0.0	6.0	6.0	6.0	6.0	0.0	1	1	0	1	1	1	1	1	0	1	0	1	1	0	1	1	12
1101111001000011	9.587036234494226	9.601905717556617	9.51135657143332	9.566766174494722	0.019823989949899232	6.0	6.0	6.0	6.0	0.0	6.0	6.0	6.0	6.0	0.0	1	1	0	1	1	1	1	0	0	1	0	0	0	0	1	1	9
1101110111111101	9.615339765525585	9.600303718843906	9.525389616491118	9.580344366953536	0.019670363171293073	8.122929464912666	8.073514925672118	8.121497843410356	8.105980744665047	0.011482119702626628	6.0	6.0	6.0	6.0	0.0	1	1	0	1	1	1	0	1	1	1	1	1	1	1	0	1	13
1101110101110100	9.62135534944171	9.654530131070032	9.528371287813917	9.601418922775219	0.026699279840792116	6.0	6.0	6.0	6.0	0.0	6.0	6.0	6.0	6.0	0.0	1	1	0	1	1	1	0	1	0	1	1	1	0	1	0	0	10
1101110101011001	9.597531607780256	9.590792259702297	9.52572203026888	9.571348632583812	0.01618999090092706	6.0	6.0	6.0	6.0	0.0	6.0	6.0	6.0	6.0	0.0	1	1	0	1	1	1	0	1	0	1	0	1	1	0	0	1	10
1101010101110001	9.484102570531565	9.477294434396695	9.506149041312323	9.489182015413528	0.006157619335635093	6.0	6.0	6.0	6.0	0.0	6.0	6.0	6.0	6.0	0.0	1	1	0	1	0	1	0	1	0	1	1	1	0	0	0	1	9
1101001111001101	9.580040875521954	9.569259026688504	9.485068034443547	9.544789312218002	0.021229049791606495	6.533691631194552	6.899812484242097	6.400924633059131	6.611476249498593	0.10548310065915638	6.0	6.0	6.0	6.0	0.0	1	1	0	1	0	0	1	1	1	1	0	0	1	1	0	1	10
1101000001110111	9.464676137628816	9.531331553167835	9.547475746631347	9.514494479142668	0.01791907321375648	6.0	6.0	6.0	6.0	0.0	6.0	6.0	6.0	6.0	0.0	1	1	0	1	0	0	0	0	0	1	1	1	0	1	1	1	9
1011000001010011	9.420091416935188	9.458871032165497	9.47701904534373	9.451993831481472	0.01187196021438438	6.0	6.0	6.0	6.0	0.0	6.0	6.0	6.0	6.0	0.0	1	0	1	1	0	0	0	0	0	1	0	1	0	0	1	1	7
1001010110111101	9.524148833229457	9.397321056984424	9.345975958090637	9.42248194943484	0.03744150157353117	6.0	6.0	6.0	6.0	0.0	6.0	6.0	6.0	6.0	0.0	1	0	0	1	0	1	0	1	1	0	1	1	1	1	0	1	10
1001001111011011	9.513003904843178	9.56693649309458	9.487042834517569	9.522327744151776	0.016638057052004048	6.0	6.0	6.0	6.0	0.0	6.0	6.0	6.0	6.0	0.0	1	0	0	1	0	0	1	1	1	1	0	1	1	0	1	1	10
1001000011101101	9.588130391509573	9.46687498106132	9.504498555847094	9.519834642805996	0.025338098169725244	6.810679074976241	6.715202808872872	6.041920329831246	6.522600737893453	0.17106001401476895	6.0	6.0	6.0	6.0	0.0	1	0	0	1	0	0	0	0	1	1	1	0	1	1	0	1	8
1001000011000011	9.590834791807225	9.516370516075924	9.55532533550594	9.554176881129697	0.015205378985946412	6.0	6.0	6.0	6.0	0.0	6.0	6.0	6.0	6.0	0.0	1	0	0	1	0	0	0	0	1	1	0	0	0	0	1	1	6
0111010101011101	9.536564802319274	9.53647972543934	9.4465470143466	9.506530514035072	0.021207376804925595	6.0	6.0	6.0	6.0	0.0	6.0	6.0	6.0	6.0	0.0	0	1	1	1	0	1	0	1	0	1	0	1	1	1	0	1	10
0111010001110101	9.536303217520764	9.395738135131083	9.446160843951857	9.459400732201233	0.0290720558195394	6.023437664528701	6.294497727926693	6.0	6.105978464151797	0.06682310683228183	6.0	6.0	6.0	6.0	0.0	0	1	1	1	0	1	0	0	0	1	1	1	0	1	0	1	9
0111010001011101	9.457009252049641	9.4335516635575	9.41389556785672	9.434818827821287	0.008811940007033017	6.0	6.0	6.0	6.0	0.0	6.0	6.0	6.0	6.0	0.0	0	1	1	1	0	1	0	0	0	1	0	1	1	1	0	1	9
0101111101000001	9.606776669944342	9.546438818409396	9.50951467963862	9.554243389330786	0.02004435575171484	6.0	6.0	6.0	6.0	0.0	6.0	6.0	6.0	6.0	0.0	0	1	0	1	1	1	1	1	0	1	0	0	0	0	0	1	8
0101100011010011	9.544327689528336	9.376524670170246	9.409657901548725	9.443503420415768	0.036282692584200124	6.73175186134961	6.871974636467033	6.714335024631633	6.772687174149425	0.0352829908983963	6.0	6.0	6.0	6.0	0.0	0	1	0	1	1	0	0	0	1	1	0	1	0	0	1	1	8
0101011001110101	9.541602263519593	9.481633586856717	9.424821885932749	9.48268591210302	0.02384059803727479	6.0	6.0	6.0	6.0	0.0	6.0	6.0	6.0	6.0	0.0	0	1	0	1	0	1	1	0	0	1	1	1	0	1	0	1	9
1111111111100111	9.640198964369086	9.596812519276645	9.500140763490537	9.579050749045422	0.029270819569564663	7.839719091168471	8.008563057770939	7.647811837606322	7.832031328848577	0.07368817971660531	6.0	6.0	6.0	6.0	0.0	1	1	1	1	1	1	1	1	1	1	1	0	0	1	1	1	14
1111110011111111	9.611177483132405	9.592102102826251	9.487515921007118	9.563598502321923	0.027179609140245926	8.826108979426094	8.842751412257488	8.730060793030601	8.799640394904728	0.02483355723732957	6.680941144075071	7.101578475585541	7.290472492558272	7.024330704072962	0.12738231814023623	1	1	1	1	1	1	0	0	1	1	1	1	1	1	1	1	14
1111100011001101	9.464681826799488	9.509065851448053	9.518232460243027	9.497326712830189	0.01169239865017818	7.756475575380111	7.727988995225125	7.684374752145081	7.722946440916773	0.014825106482230021	6.0	6.0	6.0	6.0	0.0	1	1	1	1	1	0	0	0	1	1	0	0	1	1	0	1	10
1111011001100011	9.461182582194633	9.490493629715566	9.52774172266573	9.49313931152531	0.013618489387848393	6.0	6.0	6.0	6.0	0.0	6.0	6.0	6.0	6.0	0.0	1	1	1	1	0	1	1	0	0	1	1	0	0	0	1	1	10
1101111101110101	9.610382313090502	9.551758554282902	9.464947860793883	9.542362909389096	0.0298719589412666	6.0	6.0	6.0	6.0	0.0	6.0	6.0	6.0	6.0	0.0	1	1	0	1	1	1	1	1	0	1	1	1	0	1	0	1	12
1101101111110011	9.536751400477652	9.56556652699771	9.468833819390246	9.523717248955203	0.02027609844825667	6.848245702852807	6.885231411991043	6.767712498908183	6.833729871250678	0.02453129211969298	6.0	6.0	6.0	6.0	0.0	1	1	0	1	1	0	1	1	1	1	1	1	0	0	1	1	12
1101101110111011	9.426928980761813	9.341862717920405	9.306632290263023	9.358474662981747	0.02524807245210753	6.0	6.0	6.0	6.0	0.0	6.0	6.0	6.0	6.0	0.0	1	1	0	1	1	0	1	1	1	0	1	1	1	0	1	1	12
1101100011100011	9.554351525653534	9.513434481182669	9.561197169777596	9.5429943922046	0.010544010666303031	6.884268989413347	6.9338367770866975	7.171149247031768	6.996418337843938	0.0625997994710739	6.0	6.0	6.0	6.0	0.0	1	1	0	1	1	0	0	0	1	1	1	0	0	0	1	1	9
1101001010101111	9.352421427665774	9.383136820209259	9.284328793874883	9.339962347249973	0.0206445232068511	6.0	6.0	6.0	6.0	0.0	6.0	6.0	6.0	6.0	0.0	1	1	0	1	0	0	1	0	1	0	1	0	1	1	1	1	10
1011110001000111	9.582675736232598	9.513309292507367	9.457313767255805	9.517766265331923	0.02563787650951802	6.0	6.0	6.0	6.0	0.0	6.0	6.0	6.0	6.0	0.0	1	0	1	1	1	1	0	0	0	1	0	0	0	1	1	1	9
1011010110111101	9.461594216284777	9.404006977799662	9.433030371717662	9.4328771886007	0.011755070593052207	6.0	6.0	6.0	6.0	0.0	6.0	6.0	6.0	6.0	0.0	1	0	1	1	0	1	0	1	1	0	1	1	1	1	0	1	11
0110010111011101	9.571944912674264	9.500466906681194	9.436742477362131	9.503051432239197	0.02761320474535334	6.0	6.0	6.0	6.0	0.0	6.0	6.0	6.0	6.0	0.0	0	1	1	0	0	1	0	1	1	1	0	1	1	1	0	1	10
0101011001001111	9.527238125446104	9.401692836148259	9.360662681207645	9.429864547600667	0.03543086848692914	6.0	6.0	6.0	6.0	0.0	6.0	6.0	6.0	6.0	0.0	0	1	0	1	0	1	1	0	0	1	0	0	1	1	1	1	9
0101000111010111	9.540427412081858	9.400085533834561	9.442178974821807	9.460897306912742	0.029401651497533928	7.045380311942138	6.760425407181443	6.0	6.60193523970786	0.22062198025824378	6.0	6.0	6.0	6.0	0.0	0	1	0	1	0	0	0	1	1	1	0	1	0	1	1	1	9
0100010001111101	9.520473697802386	9.395248173242573	9.363164708592851	9.426295526545937	0.033934945439495615	6.0	6.0	6.0	6.0	0.0	6.0	6.0	6.0	6.0	0.0	0	1	0	0	0	1	0	0	0	1	1	1	1	1	0	1	8
1111101001001110	9.509485841293808	9.599620094717821	9.52083985465982	9.54331526355715	0.020041223822838537	6.0	6.0	6.0	6.0	0.0	6.0	6.0	6.0	6.0	0.0	1	1	1	1	1	0	1	0	0	1	0	0	1	1	1	0	10
1111100001010011	9.4048694200968	9.45049348739381	9.448136421602293	9.4344997763643	0.010486955780004912	6.0	6.0	6.0	6.0	0.0	6.0	6.0	6.0	6.0	0.0	1	1	1	1	1	0	0	0	0	1	0	1	0	0	1	1	9
1101111101111101	9.589208167821571	9.628239191592268	9.60124001400163	9.606229124471824	0.00816010234423173	6.0	6.0	6.0	6.0	0.0	6.0	6.0	6.0	6.0	0.0	1	1	0	1	1	1	1	1	0	1	1	1	1	1	0	1	13
1101100111101100	9.587470747209053	9.56062989166618	9.556835896737304	9.568312178537512	0.006817705681247618	7.2822322609114645	6.9895771049035975	7.061961355103433	7.111256906972831	0.062228475073820594	6.0	6.0	6.0	6.0	0.0	1	1	0	1	1	0	0	1	1	1	1	0	1	1	0	0	10
1101100011000011	9.541106519234038	9.459079602237242	9.512125720273405	9.504103947248227	0.016982174035589936	7.36613566954183	7.217842206261189	7.252491569218867	7.278823148340628	0.03166952230253854	6.0	6.0	6.0	6.0	0.0	1	1	0	1	1	0	0	0	1	1	0	0	0	0	1	1	8
1101100001111101	9.4865144144394	9.470776656686862	9.39108618299967	9.449459084708645	0.020886462901496487	6.0	6.0	6.0	6.0	0.0	6.0	6.0	6.0	6.0	0.0	1	1	0	1	1	0	0	0	0	1	1	1	1	1	0	1	10
1101011111111110	9.602719060813524	9.548195758927063	9.572070603274966	9.574328474338516	0.011158114375162445	6.0	6.0	6.0	6.0	0.0	6.0	6.0	6.0	6.0	0.0	1	1	0	1	0	1	1	1	1	1	1	1	1	1	1	0	13
1100010011110101	9.534852682781434	9.514088871523947	9.508525959306619	9.519155837870665	0.0056646521399366994	6.0	6.0	6.0	6.0	0.0	6.0	6.0	6.0	6.0	0.0	1	1	0	0	0	1	0	0	1	1	1	1	0	1	0	1	9
1100010011010111	9.523816850702618	9.490463155788397	9.491876628120838	9.502052211537285	0.00770036919576492	6.0	6.0	6.0	6.0	0.0	6.0	6.0	6.0	6.0	0.0	1	1	0	0	0	1	0	0	1	1	0	1	0	1	1	1	9
1011110110011001	9.532673402842388	9.47857197828973	9.401875982445882	9.471040454526	0.026831369027215862	6.0449404543540535	6.0	6.0	6.0149801514513515	0.010592566674451905	6.0	6.0	6.0	6.0	0.0	1	0	1	1	1	1	0	1	1	0	0	1	1	0	0	1	10
1011011110110111	9.483575783947348	9.318223999681166	9.436708759349335	9.412836180992615	0.03479158935253066	6.0	6.0	6.0	6.0	0.0	6.0	6.0	6.0	6.0	0.0	1	0	1	1	0	1	1	1	1	0	1	1	0	1	1	1	12
1011000011111011	9.551286076041603	9.494070862147654	9.44543105509629	9.496929331095183	0.02163118696995981	7.274444899273451	7.199572111680203	7.152636213179343	7.208884408044333	0.025081128861069	6.0	6.0	6.0	6.0	0.0	1	0	1	1	0	0	0	0	1	1	1	1	1	0	1	1	10
1001101011101101	9.57213396411526	9.519076117715981	9.51452922571616	9.535246435849134	0.013074694788679241	6.400689629809159	6.4469080396273295	6.290969122834588	6.379522264090359	0.03269882635821569	6.0	6.0	6.0	6.0	0.0	1	0	0	1	1	0	1	0	1	1	1	0	1	1	0	1	10
1001011011000111	9.625468144562873	9.607795604224446	9.535810788702674	9.589691512496664	0.019388265213467523	6.0	6.0	6.0	6.0	0.0	6.0	6.0	6.0	6.0	0.0	1	0	0	1	0	1	1	0	1	1	0	0	0	1	1	1	9
1001010111111001	9.585067808016886	9.560067820876162	9.449298408778873	9.531478012557306	0.02949961948100462	6.676817323840918	6.574586690848914	6.419873102897309	6.5570923725290475	0.05281196447331982	6.0	6.0	6.0	6.0	0.0	1	0	0	1	0	1	0	1	1	1	1	1	1	0	0	1	10
1001010111011101	9.59715767412689	9.509906636696158	9.57416571203493	9.560410007619327	0.018462125356893323	6.740910858120698	6.8825183729129975	6.299457315528728	6.640962182187475	0.124152025439995	6.0	6.0	6.0	6.0	0.0	1	0	0	1	0	1	0	1	1	1	0	1	1	1	0	1	10
0111111101111111	9.598988410393837	9.499563251522426	9.477784238804565	9.525445300240277	0.02637872607814627	6.1045522049667085	6.509070186667664	6.0	6.2045407972114575	0.10976216916039998	6.0	6.0	6.0	6.0	0.0	0	1	1	1	1	1	1	1	0	1	1	1	1	1	1	1	14
0111011101110100	9.566600553819647	9.501087284472083	9.499546398658904	9.52241141231688	0.01562638661759937	6.0	6.0	6.0	6.0	0.0	6.0	6.0	6.0	6.0	0.0	0	1	1	1	0	1	1	1	0	1	1	1	0	1	0	0	10
0111001101011011	9.414243622036043	9.459214367531056	9.383555350877732	9.419004446814943	0.015535286660098103	6.0	6.0	6.0	6.0	0.0	6.0	6.0	6.0	6.0	0.0	0	1	1	1	0	0	1	1	0	1	0	1	1	0	1	1	10
0101110001110011	9.58653637997118	9.583573430730194	9.49609480395011	9.555401538217161	0.020976817816016954	6.788045162511043	6.777344996681897	6.0	6.52179671973098	0.18449592855882624	6.0	6.0	6.0	6.0	0.0	0	1	0	1	1	1	0	0	0	1	1	1	0	0	1	1	9
0101011101111101	9.549403536130175	9.479079590767864	9.411678575417064	9.4800539007717	0.028115100215734285	6.0	6.0	6.0	6.0	0.0	6.0	6.0	6.0	6.0	0.0	0	1	0	1	0	1	1	1	0	1	1	1	1	1	0	1	11
0001111101011011	9.638368544197618	9.564567390697016	9.340242354986524	9.514392763293719	0.06338759881301324	6.0	6.0	6.0	6.0	0.0	6.0	6.0	6.0	6.0	0.0	0	0	0	1	1	1	1	1	0	1	0	1	1	0	1	1	10
1111000111001101	9.556612908287633	9.469081400224061	9.467353532060217	9.49768261352397	0.020837990597292157	7.427352866137407	7.248379846882909	7.372970042701059	7.349567585240458	0.037457957914316414	6.0	6.0	6.0	6.0	0.0	1	1	1	1	0	0	0	1	1	1	0	0	1	1	0	1	10
1101111001101101	9.499696787352855	9.566364020050855	9.57015247919019	9.545404428864634	0.01617858396713351	6.0	6.0	6.0	6.0	0.0	6.0	6.0	6.0	6.0	0.0	1	1	0	1	1	1	1	0	0	1	1	0	1	1	0	1	11
1101110101010111	9.569305766238848	9.562401566003388	9.430707553378703	9.520804961873646	0.03188540485956797	6.0	6.0	6.0	6.0	0.0	6.0	6.0	6.0	6.0	0.0	1	1	0	1	1	1	0	1	0	1	0	1	0	1	1	1	11
1011101011001101	9.599785750391996	9.539104091825617	9.507373153416783	9.548754331878133	0.019169712959636733	6.862113723538919	6.993251185326175	7.161152710904622	7.005505873256571	0.06119465121421935	6.0	6.0	6.0	6.0	0.0	1	0	1	1	1	0	1	0	1	1	0	0	1	1	0	1	10
1011100111011010	9.539107737523961	9.52077159830232	9.514845461437787	9.52490826575469	0.005163953966827183	6.973624040742411	7.112898373649995	6.984255440371863	7.023592618254756	0.031648841802283806	6.0	6.0	6.0	6.0	0.0	1	0	1	1	1	0	0	1	1	1	0	1	1	0	1	0	10
1011011111011000	9.62430663849882	9.525915920371293	9.509976763208456	9.55339977402619	0.02527960889323779	6.0	6.0	6.0	6.0	0.0	6.0	6.0	6.0	6.0	0.0	1	0	1	1	0	1	1	1	1	1	0	1	1	0	0	0	10
0000010011011101	9.568133701190805	9.469872182059131	9.408614161747392	9.482206681665778	0.03285251328911616	6.0	6.0	6.0	6.0	0.0	6.0	6.0	6.0	6.0	0.0	0	0	0	0	0	1	0	0	1	1	0	1	1	1	0	1	7
1111111011011001	9.584115279294947	9.578457453972804	9.556366050968014	9.572979594745256	0.005986235941344844	8.40214471001914	8.381443469398803	8.30764624513278	8.363744808183574	0.020278978948154874	7.586560002016353	7.526252184122052	7.150831225189785	7.42121447044273	0.09638428529410162	1	1	1	1	1	1	1	0	1	1	0	1	1	0	0	1	12
1111110001101011	9.533555574979527	9.586827610235712	9.596985603306212	9.572456262840484	0.013908893095467011	6.47589219654805	6.630351925024005	6.0	6.368748040524018	0.13413040294985556	6.0	6.0	6.0	6.0	0.0	1	1	1	1	1	1	0	0	0	1	1	0	1	0	1	1	11
1111001011011111	9.603547256792512	9.489090933424782	9.55810579183425	9.550247994017182	0.023527895605057886	7.261391319691343	7.357588448346058	7.082602489392649	7.233860752476684	0.05696895134450021	6.0	6.0	6.0	6.0	0.0	1	1	1	1	0	0	1	0	1	1	0	1	1	1	1	1	12
1101111011111011	9.578361359253448	9.590402981094376	9.63353767919108	9.600767339846302	0.011843926148867532	7.345529009005301	7.187814323472657	7.132780977168155	7.222041436548705	0.045081505289097004	6.0	6.0	6.0	6.0	0.0	1	1	0	1	1	1	1	0	1	1	1	1	1	0	1	1	13
1101000011111101	9.556831182439863	9.531176156979372	9.539997858477083	9.542668399298773	0.005321245531747315	6.68033608150575	6.855612547535071	6.9346994964643445	6.823549375168388	0.05314480530276251	6.0	6.0	6.0	6.0	0.0	1	1	0	1	0	0	0	0	1	1	1	1	1	1	0	1	10
1011101001101001	9.428429928981496	9.3566582041144	9.343952025211973	9.376346719435956	0.018595955129178703	6.0	6.0	6.0	6.0	0.0	6.0	6.0	6.0	6.0	0.0	1	0	1	1	1	0	1	0	0	1	1	0	1	0	0	1	9
1011000110011011	9.402599808759504	9.31905337296898	9.376351592999317	9.366001591575934	0.01744201646610397	6.0	6.0	6.0	6.0	0.0	6.0	6.0	6.0	6.0	0.0	1	0	1	1	0	0	0	1	1	0	0	1	1	0	1	1	9
1001110010001001	9.553258049475431	9.45231332559872	9.460903270156932	9.488824881743694	0.02284794525713387	6.0	6.0	6.0	6.0	0.0	6.0	6.0	6.0	6.0	0.0	1	0	0	1	1	1	0	0	1	0	0	0	1	0	0	1	7
1001100011001010	9.612964836501801	9.577752585595425	9.512442131991062	9.567719851362762	0.020823445711007974	6.117911315548247	6.429064564522747	6.147817750621231	6.231597876897408	0.07008140297300222	6.0	6.0	6.0	6.0	0.0	1	0	0	1	1	0	0	0	1	1	0	0	1	0	1	0	7
1001010011011011	9.51926239913151	9.529036597562225	9.542840390519672	9.530379795737803	0.004836209870673826	6.70237510126971	6.6490641969817945	6.284283381619948	6.545240893290484	0.09290194678795957	6.0	6.0	6.0	6.0	0.0	1	0	0	1	0	1	0	0	1	1	0	1	1	0	1	1	9
0111011001101101	9.434138868990855	9.388970034339817	9.415138896459466	9.412749266596713	0.00925867749819894	6.0	6.0	6.0	6.0	0.0	6.0	6.0	6.0	6.0	0.0	0	1	1	1	0	1	1	0	0	1	1	0	1	1	0	1	10
0011000011111011	9.576452316121731	9.442562000602194	9.407272251493064	9.475428856072329	0.036436351373116176	6.0	6.410425747467986	6.0	6.136808582489329	0.0967382764027235	6.0	6.0	6.0	6.0	0.0	0	0	1	1	0	0	0	0	1	1	1	1	1	0	1	1	9
1111111001101110	9.722935919013203	9.575412083347832	9.64088984891403	9.64641261709169	0.030176415317854813	6.0	6.0	6.0	6.0	0.0	6.0	6.0	6.0	6.0	0.0	1	1	1	1	1	1	1	0	0	1	1	0	1	1	1	0	12
1111100101100100	9.493594978234055	9.59568853907842	9.569348974190337	9.552877497167604	0.021638145168326052	6.0	6.0	6.0	6.0	0.0	6.0	6.0	6.0	6.0	0.0	1	1	1	1	1	0	0	1	0	1	1	0	0	1	0	0	9
1111011111110010	9.67961676474067	9.56978392976982	9.54006054999576	9.596487081502083	0.030010492617330565	6.263039407516232	6.401168352085389	6.0	6.221402586533873	0.08320079158764489	6.0	6.0	6.0	6.0	0.0	1	1	1	1	0	1	1	1	1	1	1	1	0	0	1	0	12
1111000011010001	9.454992881418876	9.434820096282547	9.565066920369082	9.484959966023503	0.028619860283646888	7.616406836473775	7.59947104579368	7.576045708406693	7.59730786355805	0.008274103000227708	6.0	6.0	6.0	6.0	0.0	1	1	1	1	0	0	0	0	1	1	0	1	0	0	0	1	8
1110010111101011	9.534623958670073	9.498336798456016	9.497141261865393	9.510034006330494	0.008697285438399333	6.0	6.0	6.0	6.0	0.0	6.0	6.0	6.0	6.0	0.0	1	1	1	0	0	1	0	1	1	1	1	0	1	0	1	1	11
1110010011010011	9.524943034267343	9.58593686158742	9.471487003623519	9.527455633159429	0.02337886282479565	6.0	6.0	6.0	6.0	0.0	6.0	6.0	6.0	6.0	0.0	1	1	1	0	0	1	0	0	1	1	0	1	0	0	1	1	9
1101110011011111	9.568697265691368	9.545265615460316	9.539865187070964	9.551276022740884	0.006257208325230497	7.69837849100629	7.927419486757697	7.792065756102146	7.8059545779553785	0.04700996164476226	6.0	6.0	6.0	6.0	0.0	1	1	0	1	1	1	0	0	1	1	0	1	1	1	1	1	12
1101001111110110	9.527020004365584	9.610051769977755	9.539580586475893	9.558884120273078	0.018271281372520595	6.638831217132643	6.510870914444273	6.0	6.383234043858972	0.13798835038111018	6.0	6.0	6.0	6.0	0.0	1	1	0	1	0	0	1	1	1	1	1	1	0	1	1	0	11
1011110110000111	9.471096035086596	9.433610065151823	9.371751691375488	9.425485930537969	0.020480990492265844	6.0	6.0	6.0	6.0	0.0	6.0	6.0	6.0	6.0	0.0	1	0	1	1	1	1	0	1	1	0	0	0	0	1	1	1	10
1011110001001101	9.587276151091086	9.552404652517103	9.497444070252689	9.545708291286958	0.018489103219790897	6.0	6.0	6.0	6.0	0.0	6.0	6.0	6.0	6.0	0.0	1	0	1	1	1	1	0	0	0	1	0	0	1	1	0	1	9
1011100111011101	9.5493828957327	9.510367795258777	9.482462177863686	9.514070956285055	0.013722734610953325	7.329578323134579	7.610518463764902	7.731780521223753	7.557292436041078	0.08422827074621247	6.0	6.0	6.0	6.0	0.0	1	0	1	1	1	0	0	1	1	1	0	1	1	1	0	1	11
1001000101011011	9.4823370938072	9.487919272082683	9.484872072964242	9.485042812951376	0.001141055263212167	6.0	6.0	6.0	6.0	0.0	6.0	6.0	6.0	6.0	0.0	1	0	0	1	0	0	0	1	0	1	0	1	1	0	1	1	8
0101010001101101	9.597762638642683	9.426452083041983	9.334394728692976	9.452869816792548	0.05456507810282759	6.0	6.0	6.0	6.0	0.0	6.0	6.0	6.0	6.0	0.0	0	1	0	1	0	1	0	0	0	1	1	0	1	1	0	1	8
0011000101011011	9.495399207537817	9.41328909126005	9.300079922278107	9.40292274035866	0.040037486022162505	6.0	6.0	6.0	6.0	0.0	6.0	6.0	6.0	6.0	0.0	0	0	1	1	0	0	0	1	0	1	0	1	1	0	1	1	8
0001111001111011	9.603979867042193	9.518641503124387	9.357301966115068	9.49330777876055	0.05114333598502071	6.0	6.0	6.0	6.0	0.0	6.0	6.0	6.0	6.0	0.0	0	0	0	1	1	1	1	0	0	1	1	1	1	0	1	1	10
0001010011110011	9.581633690441775	9.415933577983429	9.414683876156444	9.470750381527216	0.03920399976521369	6.0	6.420599463342061	6.0	6.14019982111402	0.09913624423086466	6.0	6.0	6.0	6.0	0.0	0	0	0	1	0	1	0	0	1	1	1	1	0	0	1	1	8
1111111011000111	9.542660171776737	9.532966896586382	9.628597841311834	9.56807496989165	0.021489351509088466	7.637319011870883	7.492971112551519	7.537300731271887	7.555863618564763	0.03018695799503571	6.0	6.0	6.0	6.0	0.0	1	1	1	1	1	1	1	0	1	1	0	0	0	1	1	1	12
1111110101111011	9.60276846391389	9.607710551846736	9.477064784942131	9.562514600234252	0.030227910001567583	6.531478681063932	7.111304200246253	6.140815513144548	6.594532798151579	0.19935058699410887	6.0	6.0	6.0	6.0	0.0	1	1	1	1	1	1	0	1	0	1	1	1	1	0	1	1	13
1111001111011101	9.536335910404423	9.535585546264024	9.594265943087036	9.555395799918495	0.013743524439064639	7.223077534497037	7.191731133878004	7.2378293268686615	7.217545998414567	0.009610838220681994	6.0	6.0	6.0	6.0	0.0	1	1	1	1	0	0	1	1	1	1	0	1	1	1	0	1	12
1110001111011101	9.533790639816043	9.498626524761166	9.45002267557349	9.494146613383567	0.01717226524951799	6.0	6.0	6.0	6.0	0.0	6.0	6.0	6.0	6.0	0.0	1	1	1	0	0	0	1	1	1	1	0	1	1	1	0	1	11
1101111011011010	9.568835112020377	9.625003851936151	9.609636482709906	9.601158482222145	0.011850732784194799	7.342575632721625	7.089769876571685	6.775614779149172	7.069320096147494	0.11595602435869778	6.0	6.0	6.0	6.0	0.0	1	1	0	1	1	1	1	0	1	1	0	1	1	0	1	0	11
1101000011100011	9.492336397209408	9.498203047825548	9.546855298111664	9.512464914382207	0.012217666629089829	6.865331513616553	6.627499810953605	6.4776664502878765	6.656832591619345	0.07980847840047554	6.0	6.0	6.0	6.0	0.0	1	1	0	1	0	0	0	0	1	1	1	0	0	0	1	1	8
1011111110010011	9.571756651862312	9.358886125846324	9.428568384213817	9.453070387307484	0.04430712194121561	6.0	6.0	6.0	6.0	0.0	6.0	6.0	6.0	6.0	0.0	1	0	1	1	1	1	1	1	1	0	0	1	0	0	1	1	11
1001101011100101	9.600848014275307	9.49896064566316	9.53145213440799	9.543753598115487	0.021247562517800272	6.721047789834698	6.709958467115589	6.184662480550473	6.538556245833586	0.12514081475101485	6.0	6.0	6.0	6.0	0.0	1	0	0	1	1	0	1	0	1	1	1	0	0	1	0	1	9
1001001111111101	9.6102181013582	9.536398951682392	9.484545148354917	9.543720733798503	0.02578316359292826	6.0	6.0	6.0	6.0	0.0	6.0	6.0	6.0	6.0	0.0	1	0	0	1	0	0	1	1	1	1	1	1	1	1	0	1	11
0111000111010111	9.463076872679652	9.374949406883458	9.344357312476957	9.394127864013356	0.025164271653453606	7.070516856624737	7.186089019061599	7.013335858263327	7.089980577983222	0.03592826412517261	6.0	6.0	6.0	6.0	0.0	0	1	1	1	0	0	0	1	1	1	0	1	0	1	1	1	10
0011011111101111	9.53394364168391	9.473122711019043	9.441553677911607	9.482873343538186	0.01917151740366609	6.0	6.0	6.0	6.0	0.0	6.0	6.0	6.0	6.0	0.0	0	0	1	1	0	1	1	1	1	1	1	0	1	1	1	1	12
1111111010101101	9.4835968657136	9.470520027482277	9.436922725954364	9.463679873050081	0.009829459251474652	6.0	6.0	6.0	6.0	0.0	6.0	6.0	6.0	6.0	0.0	1	1	1	1	1	1	1	0	1	0	1	0	1	1	0	1	12
1111110011001101	9.550465900662946	9.57047963537925	9.573006878650787	9.564650804897662	0.005041583262385802	8.52323382147803	8.353339785602135	8.354925244652197	8.41049961724412	0.03985887400836745	6.0	6.0	6.0	6.0	0.0	1	1	1	1	1	1	0	0	1	1	0	0	1	1	0	1	11
1111110010101101	9.519993991783199	9.470058950754963	9.431182642659811	9.473745195065993	0.018175327741746992	6.29826774032983	6.098741015070658	6.0	6.1323362518001625	0.06203143178871685	6.0	6.0	6.0	6.0	0.0	1	1	1	1	1	1	0	0	1	0	1	0	1	1	0	1	11
1111010111101001	9.529522081644817	9.520203672187453	9.454857618715746	9.50152779084934	0.016609670445948847	7.3116935443546	7.337883488337172	7.304803211458232	7.318126748050001	0.007125257444901362	6.0	6.0	6.0	6.0	0.0	1	1	1	1	0	1	0	1	1	1	1	0	1	0	0	1	11
1111000111101111	9.587328973057687	9.496860335407117	9.46334652116856	9.515845276544455	0.026182796790389703	7.384206287737711	7.385178548228621	7.270977152292968	7.346787329419766	0.026803679907844154	6.0	6.0	6.0	6.0	0.0	1	1	1	1	0	0	0	1	1	1	1	0	1	1	1	1	12
1101110111100000	9.60655451796112	9.617410383307883	9.594532227126162	9.606165709465055	0.004672006824405638	7.880610943818718	7.7691434897599345	7.5997707651222335	7.749841732900296	0.05773101398724062	6.0	6.0	6.0	6.0	0.0	1	1	0	1	1	1	0	1	1	1	1	0	0	0	0	0	9
1101110010011100	9.617534620903994	9.42982438443511	9.480274264898522	9.509211090079209	0.03965851759595984	6.0	6.0	6.0	6.0	0.0	6.0	6.0	6.0	6.0	0.0	1	1	0	1	1	1	0	0	1	0	0	1	1	1	0	0	9
1101011011110011	9.591866140715442	9.557153801909859	9.614264101546894	9.587761348057398	0.011747578283999128	6.0	6.0	6.0	6.0	0.0	6.0	6.0	6.0	6.0	0.0	1	1	0	1	0	1	1	0	1	1	1	1	0	0	1	1	11
1101000110011011	9.344554740902078	9.30983840430841	9.410269332212351	9.35488749247428	0.020823332811221257	6.0	6.0	6.0	6.0	0.0	6.0	6.0	6.0	6.0	0.0	1	1	0	1	0	0	0	1	1	0	0	1	1	0	1	1	9
1011101011011011	9.596397355638642	9.549157347515138	9.413156840792004	9.519570514648594	0.03883899904224232	7.150665906273067	7.363251029604963	7.3693089190605585	7.294408618312862	0.05083576489470898	6.0	6.0	6.0	6.0	0.0	1	0	1	1	1	0	1	0	1	1	0	1	1	0	1	1	11
0111110101011011	9.594704152064619	9.553488831454494	9.34383739424232	9.49734345925381	0.05492079093223412	6.179519977206043	6.917688970641391	6.0	6.365736315949145	0.1985554730717079	6.0	6.0	6.0	6.0	0.0	0	1	1	1	1	1	0	1	0	1	0	1	1	0	1	1	11
0011110101011111	9.609151080914684	9.490418718071794	9.398974439154859	9.499514746047113	0.043022491170423935	6.0	6.0	6.0	6.0	0.0	6.0	6.0	6.0	6.0	0.0	0	0	1	1	1	1	0	1	0	1	0	1	1	1	1	1	11
0010010001111101	9.52073619693525	9.388234436623462	9.35919397324756	9.42272153560209	0.03515677389793275	6.0	6.0	6.0	6.0	0.0	6.0	6.0	6.0	6.0	0.0	0	0	1	0	0	1	0	0	0	1	1	1	1	1	0	1	8
1111110110010011	9.428546551463269	9.53802239951998	9.420584149925892	9.462384366969713	0.026791428777430987	6.778826206365397	7.20828454095022	7.0182186582722625	7.001776468529293	0.08785534938062506	6.0	6.0	6.0	6.0	0.0	1	1	1	1	1	1	0	1	1	0	0	1	0	0	1	1	11
1111110011011111	9.596878798608358	9.53903468863642	9.53395065225242	9.5566213798324	0.014270930134167014	8.965248098288281	8.734504656488951	8.836121790160774	8.845291514979335	0.04721175149135064	7.237787560397309	6.922213587702617	7.779909306445982	7.313303484848636	0.17710047883521673	1	1	1	1	1	1	0	0	1	1	0	1	1	1	1	1	13
1111110001110101	9.501647270271382	9.574830707656146	9.622120925536748	9.566199634488092	0.02478019024433894	7.144886649127324	6.589947595359305	6.956940472146576	6.897258238877735	0.11522500819064355	6.0	6.0	6.0	6.0	0.0	1	1	1	1	1	1	0	0	0	1	1	1	0	1	0	1	11
1111110001001111	9.598004473769231	9.55591732709101	9.575210125396076	9.576377308752106	0.008600908058828126	6.0	6.0	6.0	6.0	0.0	6.0	6.0	6.0	6.0	0.0	1	1	1	1	1	1	0	0	0	1	0	0	1	1	1	1	11
1111010001101011	9.513597620274542	9.465583430150227	9.55607684820739	9.511752632877387	0.018483405448261093	6.0	6.0	6.0	6.0	0.0	6.0	6.0	6.0	6.0	0.0	1	1	1	1	0	1	0	0	0	1	1	0	1	0	1	1	10
1111000111111111	9.537097825981583	9.51687031117236	9.491026667138287	9.51499826809741	0.009427498150330314	7.716282847138109	7.844237632833254	7.601560563578923	7.7206936811834295	0.04956079024490921	6.0	6.0	6.0	6.0	0.0	1	1	1	1	0	0	0	1	1	1	1	1	1	1	1	1	13
1111000111001111	9.547041990977661	9.47639648803728	9.55708312813194	9.526840535715627	0.01795205451784132	7.030137410833235	7.431038526578103	7.053873230706972	7.171683056039437	0.09182391877938575	6.0	6.0	6.0	6.0	0.0	1	1	1	1	0	0	0	1	1	1	0	0	1	1	1	1	11
1101111110101011	9.581483707306358	9.532208066381395	9.436029724769305	9.51657383281902	0.030200820086228552	6.0	6.0	6.0	6.0	0.0	6.0	6.0	6.0	6.0	0.0	1	1	0	1	1	1	1	1	1	0	1	0	1	0	1	1	12
1101101011111111	9.607719782774248	9.568421828989779	9.535634918873908	9.57059217687931	0.014734255485963282	6.954794106324695	6.8892730442456065	7.080671673286905	6.974912941285736	0.03971132172706825	6.0	6.0	6.0	6.0	0.0	1	1	0	1	1	0	1	0	1	1	1	1	1	1	1	1	13
1100010011111101	9.515604372586584	9.526914328858009	9.521479552903447	9.521332751449346	0.0023092185083408313	6.0	6.0	6.0	6.0	0.0	6.0	6.0	6.0	6.0	0.0	1	1	0	0	0	1	0	0	1	1	1	1	1	1	0	1	10
1011101011011111	9.5370324723989	9.548091331525477	9.468447271790973	9.517857025238449	0.017614233794958325	7.244947532181946	7.173774229323367	7.3793102844309	7.266010681978738	0.042610659262703444	6.0	6.0	6.0	6.0	0.0	1	0	1	1	1	0	1	0	1	1	0	1	1	1	1	1	12
1010101111111001	9.56569515611402	9.561576721531047	9.571834850208246	9.566368909284437	0.0021074375629533074	6.0	6.0	6.0	6.0	0.0	6.0	6.0	6.0	6.0	0.0	1	0	1	0	1	0	1	1	1	1	1	1	1	0	0	1	11
0111000111110011	9.462495322592458	9.460920879390585	9.37277774922996	9.432064650404335	0.020963548546600107	7.084880578180844	7.083628986642351	7.127249409385238	7.098586324736144	0.01013715062320796	6.0	6.0	6.0	6.0	0.0	0	1	1	1	0	0	0	1	1	1	1	1	0	0	1	1	10
0111000101100101	9.58987615164287	9.357068546043077	9.381916957531821	9.442953885072589	0.052191913803752175	6.0	6.0	6.0	6.0	0.0	6.0	6.0	6.0	6.0	0.0	0	1	1	1	0	0	0	1	0	1	1	0	0	1	0	1	8
0101110101111011	9.669075363233043	9.568216741572241	9.4609339231975	9.566075342667595	0.04249343862482193	6.970991596710852	6.736510850509678	6.0	6.569167482406844	0.2068449589897278	6.0	6.0	6.0	6.0	0.0	0	1	0	1	1	1	0	1	0	1	1	1	1	0	1	1	11
1111111101010101	9.583149001476686	9.59467000808776	9.519948702903024	9.565922570822488	0.016423462875514876	6.0	6.0	6.0	6.0	0.0	6.0	6.0	6.0	6.0	0.0	1	1	1	1	1	1	1	1	0	1	0	1	0	1	0	1	12
1111100111000011	9.526616730339038	9.536927419031397	9.472885632520079	9.512143260630172	0.014038332040941908	7.430037026422635	7.391218730450128	7.360649619057955	7.393968458643573	0.014196970504602955	6.0	6.0	6.0	6.0	0.0	1	1	1	1	1	0	0	1	1	1	0	0	0	0	1	1	10
1111010011000111	9.516359072202198	9.497916311002157	9.4258222082041	9.480032530469485	0.019532465027308286	7.244482063730513	7.180108397367523	7.2796793717833825	7.2347566109604715	0.020613640549474642	6.0	6.0	6.0	6.0	0.0	1	1	1	1	0	1	0	0	1	1	0	0	0	1	1	1	10
1110010011001111	9.51129830119468	9.519254066969363	9.401857102324124	9.477469823496056	0.02678241417589048	6.0	6.0	6.0	6.0	0.0	6.0	6.0	6.0	6.0	0.0	1	1	1	0	0	1	0	0	1	1	0	0	1	1	1	1	10
1101111111111101	9.597400140929787	9.622691960531132	9.660112777701631	9.626734959720851	0.01288072257649226	7.172715182860024	7.521389660009704	7.495173919924067	7.396426254264598	0.07927462693993613	6.0	6.0	6.0	6.0	0.0	1	1	0	1	1	1	1	1	1	1	1	1	1	1	0	1	14
1101110101111011	9.561061593693926	9.60504770438833	9.512882148067094	9.559663815383116	0.01881970501520215	6.0	6.0	6.0	6.0	0.0	6.0	6.0	6.0	6.0	0.0	1	1	0	1	1	1	0	1	0	1	1	1	1	0	1	1	12
1101110011101000	9.541492540512623	9.599544085761922	9.588069540824506	9.57636872236635	0.012551077914538442	7.711608312486267	7.55767267433722	7.503279734611447	7.590853573811645	0.04411335428432289	6.0	6.0	6.0	6.0	0.0	1	1	0	1	1	1	0	0	1	1	1	0	1	0	0	0	9
1101110001001011	9.541587894177807	9.550776005091047	9.537428078874713	9.543263992714522	0.0027883317383265273	6.0	6.0	6.0	6.0	0.0	6.0	6.0	6.0	6.0	0.0	1	1	0	1	1	1	0	0	0	1	0	0	1	0	1	1	9
1101101110000111	9.374043294235953	9.377144615622301	9.241645132506253	9.330944347454835	0.03157838630933672	6.0	6.0	6.0	6.0	0.0	6.0	6.0	6.0	6.0	0.0	1	1	0	1	1	0	1	1	1	0	0	0	0	1	1	1	10
1101011011010010	9.5880560527111	9.507420946087427	9.488215026842576	9.527897341880367	0.021627604660563	6.0	6.0	6.0	6.0	0.0	6.0	6.0	6.0	6.0	0.0	1	1	0	1	0	1	1	0	1	1	0	1	0	0	1	0	9
1101010111101111	9.5434387093763	9.470986442594297	9.561172662919248	9.52519927162995	0.019505966613246	7.406885373442769	6.969992938791928	7.291550594524022	7.22280963558624	0.09243262360637723	6.0	6.0	6.0	6.0	0.0	1	1	0	1	0	1	0	1	1	1	1	0	1	1	1	1	12
1011111101110001	9.668765442355314	9.532056462078478	9.56501684847508	9.58861291763629	0.029125925398684926	6.0	6.0	6.0	6.0	0.0	6.0	6.0	6.0	6.0	0.0	1	0	1	1	1	1	1	1	0	1	1	1	0	0	0	1	11
1010010111110011	9.583232307398811	9.579375752107882	9.422689146709924	9.528432402072207	0.03739417355604462	6.0	6.0	6.0	6.0	0.0	6.0	6.0	6.0	6.0	0.0	1	0	1	0	0	1	0	1	1	1	1	1	0	0	1	1	10
1001000101111100	9.588525288219698	9.511395540707552	9.43072859776801	9.510216475565086	0.03221281195770326	6.0	6.0	6.0	6.0	0.0	6.0	6.0	6.0	6.0	0.0	1	0	0	1	0	0	0	1	0	1	1	1	1	1	0	0	8
0111010001110001	9.599898706753454	9.455127929618582	9.425660115729917	9.49356225070065	0.038073764869978564	6.0	6.0	6.0	6.0	0.0	6.0	6.0	6.0	6.0	0.0	0	1	1	1	0	1	0	0	0	1	1	1	0	0	0	1	8
0100010111101101	9.607911389809962	9.546162479335669	9.531212217925844	9.561762029023825	0.016599197795788615	6.0	6.0	6.0	6.0	0.0	6.0	6.0	6.0	6.0	0.0	0	1	0	0	0	1	0	1	1	1	1	0	1	1	0	1	9
1111111010001101	9.526726434491572	9.488637293228313	9.483544691446353	9.49963613972208	0.009634112147735735	6.0	6.0	6.0	6.0	0.0	6.0	6.0	6.0	6.0	0.0	1	1	1	1	1	1	1	0	1	0	0	0	1	1	0	1	11
1111110110111101	9.51440719885797	9.557613106746508	9.42574113816845	9.499253814590977	0.027446228688171755	7.382002888115207	7.298903243714374	7.32330887085625	7.334738334228611	0.017437326819313582	6.0	6.0	6.0	6.0	0.0	1	1	1	1	1	1	0	1	1	0	1	1	1	1	0	1	13
1111110101110110	9.578197906972331	9.626217878728504	9.558374407512725	9.587596731071187	0.014241591481072147	6.0	6.427166272383992	6.0	6.1423887574613305	0.10068405596563362	6.0	6.0	6.0	6.0	0.0	1	1	1	1	1	1	0	1	0	1	1	1	0	1	1	0	12
1111100010000011	9.408453804218817	9.362434858314169	9.385957743573806	9.385615468702264	0.009394357434204128	6.0	6.0	6.0	6.0	0.0	6.0	6.0	6.0	6.0	0.0	1	1	1	1	1	0	0	0	1	0	0	0	0	0	1	1	8
1111001010100001	9.358149494598207	9.388841140161503	9.37955377979949	9.375514804853067	0.006425590320599962	6.0	6.0	6.0	6.0	0.0	6.0	6.0	6.0	6.0	0.0	1	1	1	1	0	0	1	0	1	0	1	0	0	0	0	1	8
1101110010000101	9.52372092708965	9.476303466151526	9.549453425556797	9.516492606265992	0.015148793168079417	6.0	6.0	6.0	6.0	0.0	6.0	6.0	6.0	6.0	0.0	1	1	0	1	1	1	0	0	1	0	0	0	0	1	0	1	8
1101110001000111	9.523644852601548	9.542786020511912	9.492988696246352	9.519806523119938	0.01025502280112356	6.0	6.0	6.0	6.0	0.0	6.0	6.0	6.0	6.0	0.0	1	1	0	1	1	1	0	0	0	1	0	0	0	1	1	1	9
1101101011110011	9.590237175927518	9.505152966998645	9.552813037350395	9.549401060092187	0.0174095847350002	6.912155847256906	6.886048008047314	6.8852415347744325	6.894481796692884	0.006250888567364751	6.0	6.0	6.0	6.0	0.0	1	1	0	1	1	0	1	0	1	1	1	1	0	0	1	1	11
1101010010101011	9.426771579802557	9.493802120258037	9.371015846854322	9.430529848971638	0.025098840193833103	6.0	6.0	6.0	6.0	0.0	6.0	6.0	6.0	6.0	0.0	1	1	0	1	0	1	0	0	1	0	1	0	1	0	1	1	9
1011101111110111	9.521530279999205	9.520465913919836	9.485543610056236	9.509179934658425	0.008359526494891552	7.240571980586942	7.126674308568971	7.329956162800473	7.232400817318795	0.041595180002846975	6.0	6.0	6.0	6.0	0.0	1	0	1	1	1	0	1	1	1	1	1	1	0	1	1	1	13
1001110101010100	9.680355641922107	9.57953000806775	9.465103405865595	9.574996351951816	0.043967406128792914	6.0	6.0	6.0	6.0	0.0	6.0	6.0	6.0	6.0	0.0	1	0	0	1	1	1	0	1	0	1	0	1	0	1	0	0	8
1001101010011101	9.430523695690793	9.344662473583453	9.302914899082726	9.359367022785657	0.026561780400824637	6.0	6.0	6.0	6.0	0.0	6.0	6.0	6.0	6.0	0.0	1	0	0	1	1	0	1	0	1	0	0	1	1	1	0	1	9
1001000110111011	9.420531453080645	9.353116751784016	9.330758662360317	9.368135622408326	0.019078623922037657	6.0	6.0	6.0	6.0	0.0	6.0	6.0	6.0	6.0	0.0	1	0	0	1	0	0	0	1	1	0	1	1	1	0	1	1	9
0111010101100011	9.496356553971184	9.444164103376364	9.42442542446755	9.454982027271699	0.015172851061304005	6.0	6.0	6.0	6.0	0.0	6.0	6.0	6.0	6.0	0.0	0	1	1	1	0	1	0	1	0	1	1	0	0	0	1	1	9
0101111001011101	9.588253425318047	9.538629511024697	9.426300915896675	9.517727950746474	0.03387430255990043	6.0	6.0	6.0	6.0	0.0	6.0	6.0	6.0	6.0	0.0	0	1	0	1	1	1	1	0	0	1	0	1	1	1	0	1	10
1111111110011101	9.567352993137556	9.503313966465406	9.481431800831363	9.517366253478107	0.018228699439551247	6.670201514908287		6.3567974358472075	6.513499475377747	0.09047196470552056	6.0	6.0	6.0	6.0	0.0	1	1	1	1	1	1	1	1	1	0	0	1	1	1	0	1	13
1111100111100011	9.475194024274607	9.535076649675037	9.54818811680251	9.519486263584051	0.015886731832163808	7.455334558661543	7.505584605653674	7.595477563700538	7.518798909338585	0.02898556776439982	6.0	6.0	6.0	6.0	0.0	1	1	1	1	1	0	0	1	1	1	1	0	0	0	1	1	11
1111011101000111	9.507019830671855	9.486865166798193	9.39676292124496	9.463549306238336	0.02396827255049065	6.0	6.0	6.0	6.0	0.0	6.0	6.0	6.0	6.0	0.0	1	1	1	1	0	1	1	1	0	1	0	0	0	1	1	1	11
1101111111011101	9.615920444591287	9.606314126234627	9.549424056759085	9.590552875861666	0.014672849976924782	7.4077755676502415	7.681645231242928	7.440682211016615	7.510034336636594	0.061044295604503473	6.0	6.0	6.0	6.0	0.0	1	1	0	1	1	1	1	1	1	1	0	1	1	1	0	1	13
1101111001111110	9.550997087592194	9.690558821843398	9.52203293286976	9.587862947435116	0.036786688104207245	6.0	6.0	6.0	6.0	0.0	6.0	6.0	6.0	6.0	0.0	1	1	0	1	1	1	1	0	0	1	1	1	1	1	1	0	12
1101110010000111	9.507916252512427	9.422764928632702	9.455695354601406	9.462125511915511	0.017529485550211988	6.0	6.0	6.0	6.0	0.0	6.0	6.0	6.0	6.0	0.0	1	1	0	1	1	1	0	0	1	0	0	0	0	1	1	1	9
1101011101011100	9.50149432550993	9.560755362759943	9.482552570591984	9.514934086287285	0.016655277206892853	6.0	6.0	6.0	6.0	0.0	6.0	6.0	6.0	6.0	0.0	1	1	0	1	0	1	1	1	0	1	0	1	1	1	0	0	10
1011011111001101	9.532621963408264	9.546283214332933	9.491964367082048	9.523623181607748	0.01153522032072653	6.0	6.0	6.0	6.0	0.0	6.0	6.0	6.0	6.0	0.0	1	0	1	1	0	1	1	1	1	1	0	0	1	1	0	1	11
1011011001011001	9.48816503243177	9.485333564364288	9.451244465732872	9.474914354176308	0.00838850420762335	6.0	6.0	6.0	6.0	0.0	6.0	6.0	6.0	6.0	0.0	1	0	1	1	0	1	1	0	0	1	0	1	1	0	0	1	9
1011010111000111	9.624478507384143	9.531256931365236	9.489183358808273	9.54830626585255	0.028267189937826592	6.824201061937879	6.773693575075179	7.0645411425874425	6.887478593200167	0.06344434746812554	6.0	6.0	6.0	6.0	0.0	1	0	1	1	0	1	0	1	1	1	0	0	0	1	1	1	10
1001111110101101	9.541244663363617	9.542837711614329	9.393053120052524	9.49237849834349	0.035118329805968976	6.0	6.0	6.0	6.0	0.0	6.0	6.0	6.0	6.0	0.0	1	0	0	1	1	1	1	1	1	0	1	0	1	1	0	1	11
0101010001100011	9.545733493697613	9.431889737231561	9.416584938042726	9.464736056323966	0.028806821719215284	6.0	6.0	6.0	6.0	0.0	6.0	6.0	6.0	6.0	0.0	0	1	0	1	0	1	0	0	0	1	1	0	0	0	1	1	7
0100010011111011	9.617664241142894	9.526682740021089	9.424265686891617	9.522870889351866	0.039500311920212076	6.0	6.0	6.0	6.0	0.0	6.0	6.0	6.0	6.0	0.0	0	1	0	0	0	1	0	0	1	1	1	1	1	0	1	1	9
0001011001111011	9.64273860056196	9.479639383993627	9.337214352168074	9.486530778907886	0.06241245212570511	6.0	6.0	6.0	6.0	0.0	6.0	6.0	6.0	6.0	0.0	0	0	0	1	0	1	1	0	0	1	1	1	1	0	1	1	9
1111110101010111	9.557718124521726	9.511069663521154	9.497563767189725	9.522117185077535	0.012885214239006326	6.4572646976873385	6.24612916219708	6.0	6.234464619961472	0.09342982847833621	6.0	6.0	6.0	6.0	0.0	1	1	1	1	1	1	0	1	0	1	0	1	0	1	1	1	12
1111011111111110	9.556030292848794	9.56373248256472	9.524624838918353	9.548129204777288	0.008457465562330905	6.3757604044673934	6.970563233330555	6.0	6.4487745459326495	0.19979011742063085	6.0	6.0	6.0	6.0	0.0	1	1	1	1	0	1	1	1	1	1	1	1	1	1	1	0	14
1111011111111011	9.557928326773037	9.578103643483269	9.562140628933603	9.566057533063303	0.0043448715853766666	7.056994273699381	6.935981835088086	6.788287915054054	6.927088007947174	0.05493951509769183	6.0	6.0	6.0	6.0	0.0	1	1	1	1	0	1	1	1	1	1	1	1	1	0	1	1	14
1111011011101001	9.552595779185529	9.55933693044932	9.557234672181313	9.556389127272054	0.0014081305417412585	6.7132809330284955	6.600155957989722	6.218206853395313	6.510547914804509	0.10590623772451806	6.0	6.0	6.0	6.0	0.0	1	1	1	1	0	1	1	0	1	1	1	0	1	0	0	1	11
1111011010000101	9.43086354347251	9.401637457078236	9.398054724915832	9.410185241822193	0.00734737041161687	6.0	6.0	6.0	6.0	0.0	6.0	6.0	6.0	6.0	0.0	1	1	1	1	0	1	1	0	1	0	0	0	0	1	0	1	9
1101111011101111	9.603325292797702	9.577298288986393	9.573821205427736	9.58481492907061	0.006582776788716699	7.536960088914898	7.6755973343246175	7.536096835184235	7.582884752807917	0.032779321175524186	6.0	6.0	6.0	6.0	0.0	1	1	0	1	1	1	1	0	1	1	1	0	1	1	1	1	13
1101110101111110	9.601686586145355	9.592051487213618	9.598337847447846	9.597358640268938	0.0019969943198260534	6.0	6.0	6.0	6.0	0.0	6.0	6.0	6.0	6.0	0.0	1	1	0	1	1	1	0	1	0	1	1	1	1	1	1	0	12
1101110010010101	9.525842513081939	9.465978249834619	9.44921209363101	9.480344285515855	0.0164460863237137	6.0	6.0	6.0	6.0	0.0	6.0	6.0	6.0	6.0	0.0	1	1	0	1	1	1	0	0	1	0	0	1	0	1	0	1	9
1101101111111101	9.579792536972757	9.530292014206973	9.503774284249433	9.537952945143054	0.015751778121227897	7.109286344653494	6.953661807632457	7.137331414768302	7.066759855684751	0.04039391011106616	6.0	6.0	6.0	6.0	0.0	1	1	0	1	1	0	1	1	1	1	1	1	1	1	0	1	13
1101010011100011	9.545154916695566	9.532320249812653	9.526435845629383	9.534637004045868	0.003907821601780222	6.7248125102430345	6.915804320617432	6.663444184225384	6.76802033836195	0.05373018536790797	6.0	6.0	6.0	6.0	0.0	1	1	0	1	0	1	0	0	1	1	1	0	0	0	1	1	9
1101000110011101	9.40351913821052	9.346533497526114	9.486529963503372	9.412194199746668	0.028740781539542976	6.0	6.0	6.0	6.0	0.0	6.0	6.0	6.0	6.0	0.0	1	1	0	1	0	0	0	1	1	0	0	1	1	1	0	1	9
1011000101110001	9.52580912184068	9.465710131499243	9.423512166606644	9.471677139982189	0.020987578291357997	6.0	6.0	6.0	6.0	0.0	6.0	6.0	6.0	6.0	0.0	1	0	1	1	0	0	0	1	0	1	1	1	0	0	0	1	8
1001000111110111	9.57535841883763	9.492677051375539	9.579625621657039	9.549220363956735	0.02001004707314438	6.0	6.640780157084948	6.0	6.213593385694982	0.15103333144151598	6.0	6.0	6.0	6.0	0.0	1	0	0	1	0	0	0	1	1	1	1	1	0	1	1	1	10
0111110101111101	9.59138518344882	9.489552746243236	9.363546082990787	9.48149467089428	0.04659464089021474	6.800039705954009	6.808953131877983	6.179345739243717	6.5961128590252365	0.14736066095844735	6.0	6.0	6.0	6.0	0.0	0	1	1	1	1	1	0	1	0	1	1	1	1	1	0	1	12
0111100101110011	9.50859712060799	9.474622382656436	9.39999581638456	9.461071773216329	0.02267992901923853	6.0	6.0	6.0	6.0	0.0	6.0	6.0	6.0	6.0	0.0	0	1	1	1	1	0	0	1	0	1	1	1	0	0	1	1	10
0111011001001011	9.499436256604282	9.440063902150047	9.371061967015203	9.436854041923176	0.026228854845005485	6.0	6.0	6.0	6.0	0.0	6.0	6.0	6.0	6.0	0.0	0	1	1	1	0	1	1	0	0	1	0	0	1	0	1	1	9
0011011101010011	9.55662050750268	9.447251473485256	9.350159837352463	9.4513439394468	0.04216843860826495	6.0	6.0	6.0	6.0	0.0	6.0	6.0	6.0	6.0	0.0	0	0	1	1	0	1	1	1	0	1	0	1	0	0	1	1	9
1111110011010011	9.618046233724732	9.573702575108033	9.511005029146126	9.56758461265963	0.0219564985361197	8.571597377657064	8.716311569352111	8.570797671029164	8.619568872679446	0.03420409795696309	7.4429590514598525	7.0807074517415405	7.145639238689848	7.223101913963748	0.07885313872432002	1	1	1	1	1	1	0	0	1	1	0	1	0	0	1	1	11
1111110010000111	9.469753405461963	9.437109718633085	9.48976256102949	9.465541895041513	0.01085036918051904	6.0	6.0	6.0	6.0	0.0	6.0	6.0	6.0	6.0	0.0	1	1	1	1	1	1	0	0	1	0	0	0	0	1	1	1	10
1111011001101001	9.47587721557901	9.47423447167681	9.498907942692382	9.483006543316067	0.005631984973876843	6.0	6.0	6.0	6.0	0.0	6.0	6.0	6.0	6.0	0.0	1	1	1	1	0	1	1	0	0	1	1	0	1	0	0	1	10
1111010010101101	9.49737926683815	9.488188559581198	9.339787186840848	9.441785004420066	0.03611044024508529	6.0	6.0	6.0	6.0	0.0	6.0	6.0	6.0	6.0	0.0	1	1	1	1	0	1	0	0	1	0	1	0	1	1	0	1	10
1111010010010101	9.372127285994983	9.392434867551923	9.473059416696477	9.412540523414462	0.02179450160106515	6.0	6.0	6.0	6.0	0.0	6.0	6.0	6.0	6.0	0.0	1	1	1	1	0	1	0	0	1	0	0	1	0	1	0	1	9
1111000011011101	9.558170419177623	9.499776587717623	9.483472991030427	9.513806665975224	0.0160341238451373	7.788216302481158	7.648530930166607	7.518896297961534	7.651881176869767	0.054987474821304394	6.0	6.0	6.0	6.0	0.0	1	1	1	1	0	0	0	0	1	1	0	1	1	1	0	1	10
1111000011011001	9.470730187410641	9.470294850773088	9.474179598443477	9.471734878875736	0.000868894874795293	7.748522080007409	7.5719204941652265	7.462147781064828	7.594196785079155	0.05898408630918341	6.0	6.0	6.0	6.0	0.0	1	1	1	1	0	0	0	0	1	1	0	1	1	0	0	1	9
1111000001110101	9.493956343098818	9.478093944892581	9.504407189631976	9.492152492541125	0.005408898837482086	6.0	6.0	6.0	6.0	0.0	6.0	6.0	6.0	6.0	0.0	1	1	1	1	0	0	0	0	0	1	1	1	0	1	0	1	9
1101110001100001	9.578596035242816	9.57431561077045	9.529230777345619	9.560714141119627	0.01116528962388087	6.0	6.0	6.0	6.0	0.0	6.0	6.0	6.0	6.0	0.0	1	1	0	1	1	1	0	0	0	1	1	0	0	0	0	1	8
1101010101110100	9.584698698265539	9.485823197836783	9.540445417411473	9.536989104504597	0.020219836466705544	6.0	6.0	6.0	6.0	0.0	6.0	6.0	6.0	6.0	0.0	1	1	0	1	0	1	0	1	0	1	1	1	0	1	0	0	9
1100010011110111	9.578986812327845	9.461749000136333	9.525407637836988	9.522047816767055	0.023960531609571022	6.0	6.0	6.0	6.0	0.0	6.0	6.0	6.0	6.0	0.0	1	1	0	0	0	1	0	0	1	1	1	1	0	1	1	1	10
0111111001101011	9.628212368439492	9.518229859716627	9.456265659408773	9.53423596252163	0.03555175612605029	6.4596557125470575	6.0	6.0	6.1532185708490195	0.10834189045105293	6.0	6.0	6.0	6.0	0.0	0	1	1	1	1	1	1	0	0	1	1	0	1	0	1	1	11
0111011001001111	9.526122278099006	9.431060700371363	9.405428197450618	9.454203725306996	0.025959792559097913	6.0	6.0	6.0	6.0	0.0	6.0	6.0	6.0	6.0	0.0	0	1	1	1	0	1	1	0	0	1	0	0	1	1	1	1	10
0110010111011011	9.565249231828206	9.578236949029804	9.456619674221225	9.533368618359745	0.027264049953832612	6.0	6.0	6.0	6.0	0.0	6.0	6.0	6.0	6.0	0.0	0	1	1	0	0	1	0	1	1	1	0	1	1	0	1	1	10
1111111011010001	9.634406916355283	9.600932224343099	9.49770466665369	9.577681269117358	0.02908989359884098	8.779970276748028	8.65550703277841	8.542260815778757	8.659246041768398	0.04854024464253982	7.4345947247691475	7.497452866740067	7.139199261194321	7.357082284234512	0.07809454238278368	1	1	1	1	1	1	1	0	1	1	0	1	0	0	0	1	11
1111111011001101	9.672397572054797	9.601127086564867	9.53192873700392	9.601817798541195	0.028674120786908428	7.865677424826468	7.713729839450663	7.927785876728254	7.8357310470017945	0.04495847330659692	6.0	6.0	6.0	6.0	0.0	1	1	1	1	1	1	1	0	1	1	0	0	1	1	0	1	12
1111110110011101	9.50129695829621	9.457858680345538	9.475296921993849	9.478150853545198	0.008924028348647748	7.149231462852709	7.404485652338855	7.071241583241718	7.208319566144428	0.07115880755987973	6.0	6.0	6.0	6.0	0.0	1	1	1	1	1	1	0	1	1	0	0	1	1	1	0	1	12
1111101111111100	9.57773846009371	9.590686245596489	9.510621519533144	9.559682075074448	0.01754572535725109	7.738655426799929	7.618432885683568	7.529763665091528	7.628950659191676	0.04280169330195125	6.0	6.0	6.0	6.0	0.0	1	1	1	1	1	0	1	1	1	1	1	1	1	1	0	0	13
1110010011110101	9.533732198744408	9.474761356049397	9.408589362168325	9.47236097232071	0.02555876812404042	6.0	6.0	6.0	6.0	0.0	6.0	6.0	6.0	6.0	0.0	1	1	1	0	0	1	0	0	1	1	1	1	0	1	0	1	10
1101011111111011	9.568450887125437	9.556884856848061	9.518020135624543	9.547785293199347	0.010785149652678148	6.0	6.0	6.0	6.0	0.0	6.0	6.0	6.0	6.0	0.0	1	1	0	1	0	1	1	1	1	1	1	1	1	0	1	1	13
1011111011110011	9.624920719244876	9.56628034635804	9.532725770594057	9.574642278732325	0.019050015634096317	7.4959806124526684	7.629823577972784	7.655596662636555	7.5938002843540025	0.03498232680329441	7.689796677778442	7.564901085553241	7.5823149050736305	7.612337556135105	0.027615656555325566	1	0	1	1	1	1	1	0	1	1	1	1	0	0	1	1	12
1001011111010011	9.566620803357953	9.54998824020851	9.442990142571633	9.519866395379365	0.027391084996000823	6.0	6.0	6.0	6.0	0.0	6.0	6.0	6.0	6.0	0.0	1	0	0	1	0	1	1	1	1	1	0	1	0	0	1	1	10
1001011111001111	9.618662174626706	9.505371211079494	9.497815674206539	9.540616353304246	0.02763643188432822	6.0	6.0	6.0	6.0	0.0	6.0	6.0	6.0	6.0	0.0	1	0	0	1	0	1	1	1	1	1	0	0	1	1	1	1	11
0111010001111111	9.508014026555426	9.412058642453683	9.425556891903588	9.4485431869709	0.02120588069073981	6.0	6.419932818307558	6.403973136854359	6.274635318387305	0.09715288333111409	6.0	6.0	6.0	6.0	0.0	0	1	1	1	0	1	0	0	0	1	1	1	1	1	1	1	11
0101000101011101	9.492068667455367	9.416652657370825	9.356699493291753	9.42180693937265	0.0276921417723827	6.0	6.0	6.0	6.0	0.0	6.0	6.0	6.0	6.0	0.0	0	1	0	1	0	0	0	1	0	1	0	1	1	1	0	1	8
1111110101010110	9.612981750409617	9.594984488531145	9.448395544120855	9.552120594353873	0.03685589028717582	6.265767174670768	6.0	6.0	6.088589058223589	0.06264192380882988	6.0	6.0	6.0	6.0	0.0	1	1	1	1	1	1	0	1	0	1	0	1	0	1	1	0	11
1111000011101111	9.534099803741787	9.547502042555166	9.474450764902855	9.51868420373327	0.015876359964717618	7.3521373208060865	7.394370155697521	7.308461386562227	7.351656287688612	0.017536878752267514	6.0	6.0	6.0	6.0	0.0	1	1	1	1	0	0	0	0	1	1	1	0	1	1	1	1	11
1101101110111101	9.379376365199485	9.399875113718815	9.346585721838537	9.375279066918946	0.01097368603859756	6.0	6.0	6.0	6.0	0.0	6.0	6.0	6.0	6.0	0.0	1	1	0	1	1	0	1	1	1	0	1	1	1	1	0	1	12
1101100001101101	9.460475829008058	9.46743245443215	9.421061839135513	9.449656707525241	0.010209052624934845	6.0	6.0	6.0	6.0	0.0	6.0	6.0	6.0	6.0	0.0	1	1	0	1	1	0	0	0	0	1	1	0	1	1	0	1	9
1101010011001001	9.58078747397203	9.494229947706923	9.517726142253832	9.530914521310928	0.018273392974937307	7.050659469360019	6.794792002424495	6.550353368156316	6.79860161331361	0.10213343688263668	6.0	6.0	6.0	6.0	0.0	1	1	0	1	0	1	0	0	1	1	0	0	1	0	0	1	8
1011111011111010	9.62175679009956	9.623939665028905	9.5980843658347	9.614593606987723	0.0058538807402407425	7.4025678440977	7.253162787402228	7.312356096400873	7.322695575966933	0.030715485697546164	6.392300047917317	6.0	6.029819985835317	6.140706677917545	0.08915971227679605	1	0	1	1	1	1	1	0	1	1	1	1	1	0	1	0	12
1001111101011100	9.676187699428919	9.523509881356373	9.537176790371712	9.578958123719	0.03448886026689468	6.0	6.0	6.0	6.0	0.0	6.0	6.0	6.0	6.0	0.0	1	0	0	1	1	1	1	1	0	1	0	1	1	1	0	0	10
1001101111101111	9.604403045764863	9.536129469856835	9.497221818906377	9.545918111509359	0.022150308413103868	6.485189962655483	6.986929474872572	6.0	6.490706479176019	0.2014655764884553	6.0	6.0	6.0	6.0	0.0	1	0	0	1	1	0	1	1	1	1	1	0	1	1	1	1	12
1000010111111111	9.633253821260213	9.531803604981473	9.431305201213878	9.532120875818523	0.04122274206519758	6.0	6.0	6.0	6.0	0.0	6.0	6.0	6.0	6.0	0.0	1	0	0	0	0	1	0	1	1	1	1	1	1	1	1	1	11
0111011101011001	9.509685194374036	9.472015056976334	9.45422177344518	9.47864067493185	0.011561227409263297	6.0	6.0	6.0	6.0	0.0	6.0	6.0	6.0	6.0	0.0	0	1	1	1	0	1	1	1	0	1	0	1	1	0	0	1	10
0101111110011101	9.529545896143992	9.397637902155214	9.345856648196596	9.4243468154986	0.03866622016665691	6.0	6.0	6.0	6.0	0.0	6.0	6.0	6.0	6.0	0.0	0	1	0	1	1	1	1	1	1	0	0	1	1	1	0	1	11
0101011111111011	9.49488844418603	9.533095393191742	9.45291994671888	9.493634594698884	0.016371747301285842	6.163877059019784	6.604839650374278	6.0	6.256238903131354	0.1277078589019924	6.0	6.0	6.0	6.0	0.0	0	1	0	1	0	1	1	1	1	1	1	1	1	0	1	1	12
0101010001111010	9.601784593467904	9.495874279366936	9.572597976168408	9.556752283001083	0.022332947082006616	6.0	6.0	6.0	6.0	0.0	6.0	6.0	6.0	6.0	0.0	0	1	0	1	0	1	0	0	0	1	1	1	1	0	1	0	8
0101000011111101	9.540027934861794	9.450966890571213	9.431288631293192	9.4740944855754	0.023654538934259443	6.710283135392836	6.998591314711317	6.994442887840358	6.901105779314837	0.067471306785938	6.0	6.0	6.0	6.0	0.0	0	1	0	1	0	0	0	0	1	1	1	1	1	1	0	1	9
0101000001110111	9.532892734077167	9.39257142827134	9.347976066611958	9.424480076320156	0.03939577989632282	6.0	6.0	6.0	6.0	0.0	6.0	6.0	6.0	6.0	0.0	0	1	0	1	0	0	0	0	0	1	1	1	0	1	1	1	8
0011010001011101	9.58117918725551	9.454313364712798	9.393787569713915	9.476426707227407	0.03904197424800251	6.0	6.0	6.0	6.0	0.0	6.0	6.0	6.0	6.0	0.0	0	0	1	1	0	1	0	0	0	1	0	1	1	1	0	1	8
1111111001101101	9.51522381729338	9.540112188463288	9.576296247445109	9.543877417733926	0.012537232182282731	6.0	6.0	6.0	6.0	0.0	6.0	6.0	6.0	6.0	0.0	1	1	1	1	1	1	1	0	0	1	1	0	1	1	0	1	12
1111110101001001	9.559071357010486	9.646139266506674	9.576605996240813	9.59393887325266	0.018799497711108733	6.0	6.0	6.0	6.0	0.0	6.0	6.0	6.0	6.0	0.0	1	1	1	1	1	1	0	1	0	1	0	0	1	0	0	1	10
1111011010101111	9.399776700721436	9.422428752287292	9.35650531779106	9.392903590266597	0.013674212588165646	6.0	6.0	6.0	6.0	0.0	6.0	6.0	6.0	6.0	0.0	1	1	1	1	0	1	1	0	1	0	1	0	1	1	1	1	12
1111000001100011	9.456466585192633	9.458823481241488	9.437967185492463	9.451085750642195	0.004662998024109544	6.0	6.0	6.0	6.0	0.0	6.0	6.0	6.0	6.0	0.0	1	1	1	1	0	0	0	0	0	1	1	0	0	0	1	1	8
1101111011010001	9.588771162850737	9.54064087351784	9.615245133860649	9.581552390076409	0.015440919260199304	7.310878298432135	7.197215229825628	7.65185056919135	7.386648032483038	0.09659115935965591	6.0	6.0	6.0	6.0	0.0	1	1	0	1	1	1	1	0	1	1	0	1	0	0	0	1	10
1101100101011001	9.517978208484273	9.416898976610893	9.382355174020985	9.439077453038719	0.028773006683789012	6.0	6.0	6.0	6.0	0.0	6.0	6.0	6.0	6.0	0.0	1	1	0	1	1	0	0	1	0	1	0	1	1	0	0	1	9
1101011111010001	9.426849543664153	9.587739257660104	9.477633662416807	9.497407487913689	0.033577343920443786	6.0	6.0	6.0	6.0	0.0	6.0	6.0	6.0	6.0	0.0	1	1	0	1	0	1	1	1	1	1	0	1	0	0	0	1	10
1101011111000011	9.603764785735047	9.612436785179543	9.531053006920077	9.582418192611556	0.018246404300717292	6.0	6.0	6.0	6.0	0.0	6.0	6.0	6.0	6.0	0.0	1	1	0	1	0	1	1	1	1	1	0	0	0	0	1	1	10
1101011010011101	9.353102391216677	9.372786243181917	9.378826032529568	9.368238222309387	0.005491505576665692	6.0	6.0	6.0	6.0	0.0	6.0	6.0	6.0	6.0	0.0	1	1	0	1	0	1	1	0	1	0	0	1	1	1	0	1	10
1011101101111111	9.46204803124976	9.511882457253849	9.329618611397274	9.434516366633629	0.038456732817563295	6.0	6.0	6.0	6.0	0.0	6.0	6.0	6.0	6.0	0.0	1	0	1	1	1	0	1	1	0	1	1	1	1	1	1	1	13
1011100001011011	9.50667754530345	9.421943371514029	9.40092299089792	9.4431813025718	0.02285568394327416	6.0	6.0	6.0	6.0	0.0	6.0	6.0	6.0	6.0	0.0	1	0	1	1	1	0	0	0	0	1	0	1	1	0	1	1	9
1011011011101111	9.658795993028978	9.511331908668259	9.511880811420301	9.56066957103918	0.03469311012998544	6.0	6.0	6.0	6.0	0.0	6.0	6.0	6.0	6.0	0.0	1	0	1	1	0	1	1	0	1	1	1	0	1	1	1	1	12
1011010111011111	9.59005713970285	9.566403827398213	9.458813988853828	9.538424985318295	0.028557844410641447	7.355030109651662	7.2474933693924655	7.305341435800595	7.3026216382815745	0.021971897203404464	6.0	6.215299484036474	6.834415566943968	6.349905016993481	0.17684801465127517	1	0	1	1	0	1	0	1	1	1	0	1	1	1	1	1	12
1001010110011110	9.487721712941516	9.429589524235151	9.437720582192533	9.451677273123067	0.012851262955094703	6.0	6.0	6.0	6.0	0.0	6.0	6.0	6.0	6.0	0.0	1	0	0	1	0	1	0	1	1	0	0	1	1	1	1	0	9
1001000111000111	9.579658730509887	9.554795139141374	9.421538545903186	9.51866413851815	0.034712113878637485	6.558423951163842	6.502353570498282	6.0	6.353592507220708	0.12553665983088036	6.0	6.0	6.0	6.0	0.0	1	0	0	1	0	0	0	1	1	1	0	0	0	1	1	1	8
1001000111000011	9.525805730420004	9.561783414696562	9.531941785586183	9.539843643567584	0.007857352831844668	6.086648750827867	6.128569719910287	6.0	6.071739490246052	0.026768320074840805	6.0	6.0	6.0	6.0	0.0	1	0	0	1	0	0	0	1	1	1	0	0	0	0	1	1	7
0101111101011011	9.582099053331378	9.528589439226332	9.468501497044892	9.526396663200869	0.02320096046355521	6.0	6.0	6.0	6.0	0.0	6.0	6.0	6.0	6.0	0.0	0	1	0	1	1	1	1	1	0	1	0	1	1	0	1	1	11
0101000001110101	9.552264250213804	9.41489413898616	9.446513246587912	9.471223878595959	0.029370048136811325	6.0	6.0	6.0	6.0	0.0	6.0	6.0	6.0	6.0	0.0	0	1	0	1	0	0	0	0	0	1	1	1	0	1	0	1	7
0100010111111101	9.617819764573476	9.53512157432809	9.460849120905024	9.537930153268862	0.03205688129500407	6.0	6.0	6.0	6.0	0.0	6.0	6.0	6.0	6.0	0.0	0	1	0	0	0	1	0	1	1	1	1	1	1	1	0	1	10
1111010011101111	9.664568722823683	9.51564043076171	9.496774094406891	9.558994415997429	0.037524292927485436	7.355426902399637	7.451715154150406	7.285619861925981	7.364253972825342	0.03404739198040621	6.0	6.0	6.0	6.0	0.0	1	1	1	1	0	1	0	0	1	1	1	0	1	1	1	1	12
1101110111011001	9.549158021115133	9.602101788952833	9.502360123581381	9.551206644549781	0.02037256159744614	7.833998214579741	8.03157464441078	8.013698935701473	7.959757264897331	0.044612011262012696	6.0	6.0	6.0	6.0	0.0	1	1	0	1	1	1	0	1	1	1	0	1	1	0	0	1	11
1101110001110010	9.633466830056106	9.633851451047493	9.532642444299203	9.599986908467601	0.023809993083868514	6.0	6.0	6.0	6.0	0.0	6.0	6.0	6.0	6.0	0.0	1	1	0	1	1	1	0	0	0	1	1	1	0	0	1	0	9
1101000101111101	9.493271028230149	9.530777244751992	9.498698033755831	9.50758210224599	0.00827520467168053	6.0	6.0	6.0	6.0	0.0	6.0	6.0	6.0	6.0	0.0	1	1	0	1	0	0	0	1	0	1	1	1	1	1	0	1	10
1011111111011111	9.599074442193745	9.60153257149588	9.459903560327461	9.553503524672363	0.033096388508772175	7.955237535207526	7.657754463349319	8.150427580286241	7.921139859614361	0.10128646557226362	7.7304613047960595		8.281479970205687	8.005970637500873	0.1590653874013785	1	0	1	1	1	1	1	1	1	1	0	1	1	1	1	1	14
1011000111001101	9.647370889024394	9.574205476532297	9.515645615007324	9.57907399352134	0.026943347345162554	7.0879155752246055	7.225628012021603	6.6261022274972285	6.979881938247812	0.12819987104531785	6.0	6.0	6.0	6.0	0.0	1	0	1	1	0	0	0	1	1	1	0	0	1	1	0	1	9
1001100011011100	9.578977934093748	9.587116147881586	9.478649201254052	9.548247761076462	0.024662817080000232	6.0	6.609150197620286	6.330477887000816	6.313209361540367	0.12449206286205022	6.0	6.0	6.0	6.0	0.0	1	0	0	1	1	0	0	0	1	1	0	1	1	1	0	0	8
1000010111100111	9.606951321429213	9.622415787316482	9.51606126685941	9.581809458535036	0.023458850347490352	6.0	6.0	6.0	6.0	0.0	6.0	6.0	6.0	6.0	0.0	1	0	0	0	0	1	0	1	1	1	1	0	0	1	1	1	9
1111111001100101	9.596138051672183	9.619613551511252	9.564743592241657	9.59349839847503	0.011239097934685352	6.0	6.0	6.0	6.0	0.0	6.0	6.0	6.0	6.0	0.0	1	1	1	1	1	1	1	0	0	1	1	0	0	1	0	1	11
1111110111111101	9.623185328082496	9.542026633448607	9.496467763814444	9.553893241781848	0.026204158602875404	9.046062542537337	9.243073365596805	8.836656305393586	9.041930737842575	0.08297239557385294	7.602756115977195	7.386389779375332	7.223209901276867	7.404118598876465	0.07772769299935803	1	1	1	1	1	1	0	1	1	1	1	1	1	1	0	1	14
1111110010011100	9.541083309066764	9.428627895843977	9.528836135125475	9.499515780012073	0.025187025127893937	6.414048756780188	6.378309933114557	6.173746093298707	6.32203492773115	0.05293313343620468	6.0	6.0	6.0	6.0	0.0	1	1	1	1	1	1	0	0	1	0	0	1	1	1	0	0	10
1111010011000101	9.513496966361206	9.47221014910954	9.57780214351069	9.521169752993812	0.02172391562861561	7.3071316525922105	7.05693890036783	7.218489061630744	7.194186538196928	0.05178813055829971	6.0	6.0	6.0	6.0	0.0	1	1	1	1	0	1	0	0	1	1	0	0	0	1	0	1	9
1111001111010111	9.48200383233666	9.508761424110462	9.43282690991107	9.474530722119397	0.01572364537839938	7.384138383448062	7.268676856508094	7.108152521809129	7.253655920588428	0.0565851428425535	6.0	6.0	6.0	6.0	0.0	1	1	1	1	0	0	1	1	1	1	0	1	0	1	1	1	12
1111001001010011	9.429988422979036	9.476779619292726	9.443242047116913	9.450003363129559	0.009845816021570645	6.0	6.0	6.0	6.0	0.0	6.0	6.0	6.0	6.0	0.0	1	1	1	1	0	0	1	0	0	1	0	1	0	0	1	1	9
1101011011001111	9.472798186185566	9.526921657075674	9.517698410940447	9.505806084733896	0.011820942519178746	6.0	6.0	6.0	6.0	0.0	6.0	6.0	6.0	6.0	0.0	1	1	0	1	0	1	1	0	1	1	0	0	1	1	1	1	11
1100010011001101	9.52283965015883	9.52416991558034	9.526865782214056	9.524625115984408	0.0008374405837062611	6.0	6.0	6.0	6.0	0.0	6.0	6.0	6.0	6.0	0.0	1	1	0	0	0	1	0	0	1	1	0	0	1	1	0	1	8
1011000010010000	9.484449759905141	9.364195126893254	9.421829001454194	9.423491296084196	0.024553908744446483	6.0	6.0	6.0	6.0	0.0	6.0	6.0	6.0	6.0	0.0	1	0	1	1	0	0	0	0	1	0	0	1	0	0	0	0	5
0111101111111111	9.506484014468397	9.441949234583314	9.349472606210552	9.432635285087422	0.032218544924176015	7.318139806786032	7.456863753647393	7.601773039669303	7.458925533367577	0.05790097998690648	6.0	6.0	6.0	6.0	0.0	0	1	1	1	1	0	1	1	1	1	1	1	1	1	1	1	14
0111101011001111	9.438022294907391	9.43440235668626	9.385425634319931	9.419283428637861	0.011993322206111247	7.288055315006454	7.3666996693604565	7.4664044735794945	7.373719819315468	0.036489878665119935	6.0	6.0	6.0	6.0	0.0	0	1	1	1	1	0	1	0	1	1	0	0	1	1	1	1	11
0111000101010001	9.487745222816613	9.450889343676034	9.339324828657961	9.425986465050203	0.03154961271141602	6.0	6.0	6.0	6.0	0.0	6.0	6.0	6.0	6.0	0.0	0	1	1	1	0	0	0	1	0	1	0	1	0	0	0	1	7
0101111101011111	9.653212764354869	9.601048733845802	9.395205959199613	9.549822485800094	0.055692570185552064	6.0	6.0	6.0	6.0	0.0	6.0	6.0	6.0	6.0	0.0	0	1	0	1	1	1	1	1	0	1	0	1	1	1	1	1	12
0101111001111011	9.554080322384529	9.554334036493618	9.465014937624838	9.524476432167662	0.0210228767959333	6.0	6.0	6.0	6.0	0.0	6.0	6.0	6.0	6.0	0.0	0	1	0	1	1	1	1	0	0	1	1	1	1	0	1	1	11
0101010011011111	9.589977726053824	9.47978201458907	9.419363256934108	9.496374332525667	0.035317141799067135	6.818293558439139	6.738127507028059	7.035735923082532	6.864052329516578	0.06286638101892653	6.0	6.0	6.0	6.0	0.0	0	1	0	1	0	1	0	0	1	1	0	1	1	1	1	1	10
0011011011011111	9.571291126131037	9.437166329150264	9.427612228845325	9.478689894708877	0.03279751325389054	6.0	6.0	6.0	6.0	0.0	6.0	6.0	6.0	6.0	0.0	0	0	1	1	0	1	1	0	1	1	0	1	1	1	1	1	11
0011011011001101	9.565213512809137	9.46702531550534	9.47668582051737	9.502974882943947	0.022092859422951514	6.0	6.0	6.0	6.0	0.0	6.0	6.0	6.0	6.0	0.0	0	0	1	1	0	1	1	0	1	1	0	0	1	1	0	1	9
0001010111101101	9.566624903607746	9.45633443828641	9.445686965168417	9.489548769020859	0.027337062946031443	6.6414175422970105	6.551222767626387	6.0	6.397546769974466	0.14175468838943753	6.0	6.0	6.0	6.0	0.0	0	0	0	1	0	1	0	1	1	1	1	0	1	1	0	1	9
1111011011100001	9.658441102555804	9.505017064208792	9.589782441113814	9.58441353595947	0.03137502388470169	6.654580622495012	6.0	6.0	6.21819354083167	0.1542861323331782	6.0	6.0	6.0	6.0	0.0	1	1	1	1	0	1	1	0	1	1	1	0	0	0	0	1	10
1111010110011011	9.400489859373074	9.42588170839427	9.412040703389696	9.41280409038568	0.005190111896000333	6.0	6.0	6.0	6.0	0.0	6.0	6.0	6.0	6.0	0.0	1	1	1	1	0	1	0	1	1	0	0	1	1	0	1	1	11
1110101111010011	9.52581336579034	9.609339266286304	9.45728558537283	9.530812739149825	0.03108811608510224	6.0	6.0	6.0	6.0	0.0	6.0	6.0	6.0	6.0	0.0	1	1	1	0	1	0	1	1	1	1	0	1	0	0	1	1	11
1101101011110000	9.567272208313383	9.528914215454156	9.571888215171453	9.556024879646332	0.009631268214640717	6.816830251112488	6.763746812269311	6.6981445131965724	6.759573858859457	0.024271506790480117	6.0	6.0	6.0	6.0	0.0	1	1	0	1	1	0	1	0	1	1	1	1	0	0	0	0	9
1101100101111011	9.501411153328249	9.626661868049887	9.428327648287985	9.518800223222039	0.04094895296986436	6.0	6.0	6.0	6.0	0.0	6.0	6.0	6.0	6.0	0.0	1	1	0	1	1	0	0	1	0	1	1	1	1	0	1	1	11
1101011101011011	9.555378675007878	9.563911665384543	9.497584412895602	9.538958251096007	0.014731196187949127	6.0	6.0	6.0	6.0	0.0	6.0	6.0	6.0	6.0	0.0	1	1	0	1	0	1	1	1	0	1	0	1	1	0	1	1	11
1101010011111101	9.562945641597574	9.502239698709127	9.530781381864148	9.531988907390284	0.012398900918468837	7.073578168827791	7.068161235125881	7.070822206831481	7.070853870261717	0.0011057836295536088	6.0	6.0	6.0	6.0	0.0	1	1	0	1	0	1	0	0	1	1	1	1	1	1	0	1	11
1101000111011110	9.539652675675732	9.659746974386183	9.534627276863883	9.578008975641932	0.028916947128344323	6.7184004644348585	6.841961429771301	6.204613494854947	6.5883251296870355	0.1379871926833874	6.0	6.0	6.0	6.0	0.0	1	1	0	1	0	0	0	1	1	1	0	1	1	1	1	0	10
1011000111101011	9.545321376778855	9.513454993514197	9.430635752430453	9.496470707574503	0.024167980141455388	6.500299972056575	6.902993802186563	6.818305137588844	6.740532970610661	0.08667656610790846	6.0	6.0	6.0	6.0	0.0	1	0	1	1	0	0	0	1	1	1	1	0	1	0	1	1	10
0111110101011101	9.554165009933987	9.545037148672982	9.35370326222374	9.48430180694357	0.04621113569801649	6.733008541176768	6.4782073486563725	6.058277653824093	6.423164514552411	0.1390969253054498	6.0	6.0	6.0	6.0	0.0	0	1	1	1	1	1	0	1	0	1	0	1	1	1	0	1	11
0111011101011011	9.462048729255386	9.446841605513344	9.358218682623695	9.422369672464141	0.02289223404074781	6.0	6.0	6.0	6.0	0.0	6.0	6.0	6.0	6.0	0.0	0	1	1	1	0	1	1	1	0	1	0	1	1	0	1	1	11
0011000111010111	9.52901030644557	9.377547028163194	9.344949755900373	9.417169030169712	0.04009779472116415	6.0	6.322317716579965	6.0	6.107439238859989	0.07597101436341902	6.0	6.0	6.0	6.0	0.0	0	0	1	1	0	0	0	1	1	1	0	1	0	1	1	1	9
0001000011111101	9.57578367986057	9.411597668010689	9.427903831473104	9.471761726448122	0.03692762704607061	6.0	6.0	6.0	6.0	0.0	6.0	6.0	6.0	6.0	0.0	0	0	0	1	0	0	0	0	1	1	1	1	1	1	0	1	8
1111111101011101	9.549920314713454	9.583143538966073	9.537509208485655	9.556857687388394	0.009632569614959592	6.0	6.0	6.0	6.0	0.0	6.0	6.0	6.0	6.0	0.0	1	1	1	1	1	1	1	1	0	1	0	1	1	1	0	1	13
1111111011011011	9.640554548509714	9.572306019246495	9.52509460394801	9.579318390568075	0.02369820567473289	8.611446099304949	8.136221060344045	8.380521923102831	8.37606302758394	0.09701771378274555	7.258044832351852	7.079621561305062	7.029575452257882	7.122413948638266	0.04902882777915274	1	1	1	1	1	1	1	0	1	1	0	1	1	0	1	1	13
1111110101001101	9.593465665380565	9.53057578869814	9.47586915596348	9.533303536680728	0.024023652281182663	6.0	6.0	6.0	6.0	0.0	6.0	6.0	6.0	6.0	0.0	1	1	1	1	1	1	0	1	0	1	0	0	1	1	0	1	11
1111011101110010	9.618749184975194	9.632677987019138	9.599329924316137	9.616919032103489	0.00683782879966495	6.0	6.0	6.0	6.0	0.0	6.0	6.0	6.0	6.0	0.0	1	1	1	1	0	1	1	1	0	1	1	1	0	0	1	0	11
1111011001111011	9.523159218834868	9.502308109301742	9.453431728459917	9.492966352198842	0.014611251645133095	6.0	6.0	6.0	6.0	0.0	6.0	6.0	6.0	6.0	0.0	1	1	1	1	0	1	1	0	0	1	1	1	1	0	1	1	12
1111000101001111	9.3863223879738	9.528880919392003	9.43529656623294	9.450166624532914	0.029570742002335587	6.0	6.0	6.0	6.0	0.0	6.0	6.0	6.0	6.0	0.0	1	1	1	1	0	0	0	1	0	1	0	0	1	1	1	1	10
1110010111110001	9.546227932057683	9.464031345562304	9.508472128305543	9.506243801975176	0.016796794270281662	6.0	6.0	6.0	6.0	0.0	6.0	6.0	6.0	6.0	0.0	1	1	1	0	0	1	0	1	1	1	1	1	0	0	0	1	10
1101111011101101	9.642474559141176	9.618972300025298	9.59899722503132	9.620148028065932	0.008884503340500158	7.3538547643732946	7.40666220699091	7.641293560017386	7.467270177127197	0.06246366923175197	6.0	6.0	6.0	6.0	0.0	1	1	0	1	1	1	1	0	1	1	1	0	1	1	0	1	12
1101110111010011	9.558975286675551	9.569263619956908	9.54794918285419	9.558729363162216	0.004351659952099629	7.71610228582733	7.521244678195157	7.99286873261878	7.743405232213756	0.09675260576919811	6.0	6.0	6.0	6.0	0.0	1	1	0	1	1	1	0	1	1	1	0	1	0	0	1	1	11
1101100101111111	9.513035742862355	9.501423787804919	9.437269964645466	9.483909831770914	0.016659168042319844	6.0	6.0	6.0	6.0	0.0	6.0	6.0	6.0	6.0	0.0	1	1	0	1	1	0	0	1	0	1	1	1	1	1	1	1	12
1101011010010011	9.44607254827759	9.408281299225953	9.364662393859282	9.406338747120941	0.016631964416516768	6.0	6.0	6.0	6.0	0.0	6.0	6.0	6.0	6.0	0.0	1	1	0	1	0	1	1	0	1	0	0	1	0	0	1	1	9
1101010110010001	9.397629770636987	9.36700039916073	9.42673736856173	9.397122512786483	0.012195076610386404	6.0	6.0	6.0	6.0	0.0	6.0	6.0	6.0	6.0	0.0	1	1	0	1	0	1	0	1	1	0	0	1	0	0	0	1	8
1100010111110101	9.540270410199755	9.552697371514164	9.463797050853467	9.518921610855793	0.01965385958052162	6.0	6.0	6.0	6.0	0.0	6.0	6.0	6.0	6.0	0.0	1	1	0	0	0	1	0	1	1	1	1	1	0	1	0	1	10
1011010101010010	9.666091330641846	9.55856451712923	9.525248658117363	9.583301501962813	0.03005024518744227	6.0	6.0	6.0	6.0	0.0	6.0	6.0	6.0	6.0	0.0	1	0	1	1	0	1	0	1	0	1	0	1	0	0	1	0	8
1011000101111011	9.598486482480503	9.488006130289298	9.441657201836458	9.50938327153542	0.0328927358817633	6.0	6.0	6.0	6.0	0.0	6.0	6.0	6.0	6.0	0.0	1	0	1	1	0	0	0	1	0	1	1	1	1	0	1	1	10
1011000101011001	9.553653484799684	9.419003781937734	9.477474159206427	9.483377141981281	0.027564377749893676	6.0	6.0	6.0	6.0	0.0	6.0	6.0	6.0	6.0	0.0	1	0	1	1	0	0	0	1	0	1	0	1	1	0	0	1	8
1011000011111101	9.572447633210844	9.473635856975688	9.508179030230208	9.51808750680558	0.020471831100808358	7.165068620366974	7.117444674147585	7.2228266576150055	7.168446650709854	0.021544136582954558	6.0	6.0	6.0	6.0	0.0	1	0	1	1	0	0	0	0	1	1	1	1	1	1	0	1	10
0111101101110101	9.447821112621916	9.412521810730054	9.31666844987352	9.392337124408497	0.027706261049094464	6.0	6.0	6.0	6.0	0.0	6.0	6.0	6.0	6.0	0.0	0	1	1	1	1	0	1	1	0	1	1	1	0	1	0	1	11
0101111001110001	9.604009917393526	9.563387460996944	9.45036719981139	9.53925485940062	0.03250207175796937	6.0	6.0	6.0	6.0	0.0	6.0	6.0	6.0	6.0	0.0	0	1	0	1	1	1	1	0	0	1	1	1	0	0	0	1	9
0101110010011101	9.46429161386973	9.4247865078569	9.410458199074407	9.433178773600346	0.011382235650073059	6.0	6.0	6.0	6.0	0.0	6.0	6.0	6.0	6.0	0.0	0	1	0	1	1	1	0	0	1	0	0	1	1	1	0	1	9
0010010111011011	9.592779701104293	9.522609853877837	9.40903357176114	9.508141042247757	0.037854259766103106	6.0	6.0	6.0	6.0	0.0	6.0	6.0	6.0	6.0	0.0	0	0	1	0	0	1	0	1	1	1	0	1	1	0	1	1	9
1111110111001101	9.527883306634381	9.50790254619227	9.466445774000409	9.50074387560902	0.012793732368020517	8.622258507313424	8.404149887179281	8.386519780200931	8.470976058231212	0.05360735291333793	6.0	6.0	6.0	6.0	0.0	1	1	1	1	1	1	0	1	1	1	0	0	1	1	0	1	12
1111100111111010	9.496690118171852	9.618579390265193	9.425587411683424	9.51361897337349	0.03984640417288837	7.580365443484678	7.557633879160867	7.501297750209974	7.546432357618507	0.016618416458824774	6.0	6.0	6.0	6.0	0.0	1	1	1	1	1	0	0	1	1	1	1	1	1	0	1	0	12
1111100101111001	9.490999248014703	9.47340639526865	9.474679414804047	9.479695019362467	0.004005087051715124	6.0	6.0	6.0	6.0	0.0	6.0	6.0	6.0	6.0	0.0	1	1	1	1	1	0	0	1	0	1	1	1	1	0	0	1	11
1111100011010111	9.635996826261998	9.512226528263536	9.534486180019671	9.560903178181734	0.026935617716380266	8.132155150133006	7.741457815024322	8.02641453105517	7.966675832070833	0.08250013740646404	6.0	6.0	6.0	6.0	0.0	1	1	1	1	1	0	0	0	1	1	0	1	0	1	1	1	11
1111011101001011	9.475744896087539	9.583807419198132	9.530069500938364	9.529873938741344	0.02205827852412241	6.0	6.0	6.0	6.0	0.0	6.0	6.0	6.0	6.0	0.0	1	1	1	1	0	1	1	1	0	1	0	0	1	0	1	1	11
1111000011001100	9.4505364928591	9.53164275356942	9.51848086534343	9.500220037257316	0.017770057978687477	7.250333325870905	6.656043541290822	6.9058335080429885	6.937403458401572	0.12182130583925839	6.0	6.0	6.0	6.0	0.0	1	1	1	1	0	0	0	0	1	1	0	0	1	1	0	0	8
1110010111010101	9.561180938269233	9.443173006196718	9.517807875936043	9.507387273467332	0.024368387051211984	6.0	6.0	6.0	6.0	0.0	6.0	6.0	6.0	6.0	0.0	1	1	1	0	0	1	0	1	1	1	0	1	0	1	0	1	10
1101110111010001	9.557803069066551	9.541717643249337	9.50629590068485	9.535272204333578	0.010757980454742884	7.7678390422741295	7.500039541968852	7.739670900883678	7.669183161708887	0.06007708121158343	6.0	6.0	6.0	6.0	0.0	1	1	0	1	1	1	0	1	1	1	0	1	0	0	0	1	10
1101101011110010	9.613873488122367	9.543969726595355	9.662764274691822	9.606869163136516	0.02437495842985016	6.913774604695328	7.0005630613088075	7.02666690076411	6.980334855589415	0.024128312753174255	6.0	6.0	6.0	6.0	0.0	1	1	0	1	1	0	1	0	1	1	1	1	0	0	1	0	10
1100010111010101	9.588919075796376	9.50069312873491	9.550854700735185	9.54682230175549	0.01806538870728451	6.0	6.0	6.0	6.0	0.0	6.0	6.0	6.0	6.0	0.0	1	1	0	0	0	1	0	1	1	1	0	1	0	1	0	1	9
1100010011001111	9.557187494576596	9.557560199123706	9.508016370994225	9.540921354898176	0.011633917378791594	6.0	6.0	6.0	6.0	0.0	6.0	6.0	6.0	6.0	0.0	1	1	0	0	0	1	0	0	1	1	0	0	1	1	1	1	9
1001110111111011	9.5750969810086	9.582281956769332	9.400710521508927	9.51936315309562	0.04197566994900384	7.2173666665675364	7.3308992470657754	7.344381555413586	7.297549156348967	0.028482061343525593	6.0	6.0	6.0	6.0	0.0	1	0	0	1	1	1	0	1	1	1	1	1	1	0	1	1	12
1001110001001101	9.598684063517442	9.482354928558037	9.493551426120584	9.52486347273202	0.026199396008777593	6.0	6.0	6.0	6.0	0.0	6.0	6.0	6.0	6.0	0.0	1	0	0	1	1	1	0	0	0	1	0	0	1	1	0	1	8
1001011001011101	9.573008456777956	9.484041815220928	9.412834390968056	9.489961554322313	0.03276231402793419	6.0	6.0	6.0	6.0	0.0	6.0	6.0	6.0	6.0	0.0	1	0	0	1	0	1	1	0	0	1	0	1	1	1	0	1	9
0111100001010011	9.48845195868559	9.345317054608383	9.370855860570028	9.401541624621334	0.031166521241703063	6.0	6.0	6.0	6.0	0.0	6.0	6.0	6.0	6.0	0.0	0	1	1	1	1	0	0	0	0	1	0	1	0	0	1	1	8
0111010011001101	9.514963915126971	9.405545688544676	9.367263729187382	9.429257777619677	0.03129305995443958	7.566878250044379	7.444700923027684	7.3114231968599315	7.441000789977331	0.05216095169091204	6.0	6.0	6.0	6.0	0.0	0	1	1	1	0	1	0	0	1	1	0	0	1	1	0	1	9
0101111111110111	9.597497102224267	9.576359838267825	9.43711405111701	9.536990330536367	0.035574216728039586	7.51023329097962	7.431668418619695	7.385443178285406	7.442448295961573	0.025756220521096523	6.0	6.0	6.0	6.0	0.0	0	1	0	1	1	1	1	1	1	1	1	1	0	1	1	1	13
0101010110010111	9.378984132719763	9.268152818252178	9.201562550849964	9.282899833940634	0.03658941167897751	6.0	6.0	6.0	6.0	0.0	6.0	6.0	6.0	6.0	0.0	0	1	0	1	0	1	0	1	1	0	0	1	0	1	1	1	9
1111101111011101	9.541264156146825	9.546016997743076	9.470300358293828	9.519193837394576	0.01731365838358657	7.986063890735098	7.7824310076064185	7.975000885794609	7.9144985947120405	0.04674751899388949	6.0	6.0	6.0	6.0	0.0	1	1	1	1	1	0	1	1	1	1	0	1	1	1	0	1	13
1111011010101101	9.457994799163156	9.446367693491432	9.358676460733774	9.421012984462786	0.022166713181174608	6.0	6.0	6.0	6.0	0.0	6.0	6.0	6.0	6.0	0.0	1	1	1	1	0	1	1	0	1	0	1	0	1	1	0	1	11
1111010011011111	9.514760628031398	9.550516493804583	9.507145295335793	9.524140805723926	0.009453888215194203	8.052371717847874	7.69799834644385	8.03476749289506	7.928379185728929	0.08153115510478205	6.0	6.0	6.0	6.0	0.0	1	1	1	1	0	1	0	0	1	1	0	1	1	1	1	1	12
1110010011011101	9.464210421159068	9.477131158582498	9.482060651494884	9.474467410412151	0.0037634059595153054	6.0	6.0	6.0	6.0	0.0	6.0	6.0	6.0	6.0	0.0	1	1	1	0	0	1	0	0	1	1	0	1	1	1	0	1	10
1101111001111100	9.60341010413736	9.600663104893448	9.636790683885463	9.613621297638758	0.008210784021621701	6.0	6.0	6.0	6.0	0.0	6.0	6.0	6.0	6.0	0.0	1	1	0	1	1	1	1	0	0	1	1	1	1	1	0	0	11
1101010010001011	9.455609340091817	9.360620939035119	9.367644351523227	9.394624876883386	0.02160887412368558	6.0	6.0	6.0	6.0	0.0	6.0	6.0	6.0	6.0	0.0	1	1	0	1	0	1	0	0	1	0	0	0	1	0	1	1	8
1101010001111111	9.47108802626349	9.524543088986743	9.43423763030211	9.476622915184114	0.018537103394647918	6.0	6.0	6.0	6.0	0.0	6.0	6.0	6.0	6.0	0.0	1	1	0	1	0	1	0	0	0	1	1	1	1	1	1	1	11
1011000101111110	9.574723322956194	9.5003436741065	9.491327978004843	9.522131658355844	0.018684811492787397	6.0	6.0	6.0	6.0	0.0	6.0	6.0	6.0	6.0	0.0	1	0	1	1	0	0	0	1	0	1	1	1	1	1	1	0	10
1011000010000111	9.441269285127378	9.285566683271778	9.379545463319003	9.36879381057272	0.03200917468407393	6.0	6.0	6.0	6.0	0.0	6.0	6.0	6.0	6.0	0.0	1	0	1	1	0	0	0	0	1	0	0	0	0	1	1	1	7
1001000101011101	9.510250443047793	9.483676269840286	9.440202100733444	9.478042937873841	0.014436605020053419	6.0	6.0	6.0	6.0	0.0	6.0	6.0	6.0	6.0	0.0	1	0	0	1	0	0	0	1	0	1	0	1	1	1	0	1	8
0111111001001101	9.576591730728213	9.53437741216645	9.40814566698498	9.506371603293212	0.03578119407274911	6.0	6.0	6.0	6.0	0.0	6.0	6.0	6.0	6.0	0.0	0	1	1	1	1	1	1	0	0	1	0	0	1	1	0	1	10
1111110011110010	9.595168982785449	9.519293974674646	9.608616875453068	9.574359944304389	0.01966132927325302	8.745758561832089	8.33324749147379	8.342134951414604	8.47371366824016	0.09619950175991253	6.0	6.0	6.0	6.0	0.0	1	1	1	1	1	1	0	0	1	1	1	1	0	0	1	0	11
1111010011101101	9.518400742669556	9.565730678190624	9.628013805916751	9.570715075592311	0.022443963819929663	7.540044267895331	7.3563744934058555	7.3786297894085635	7.425016183569916	0.04092150960013365	6.0	6.0	6.0	6.0	0.0	1	1	1	1	0	1	0	0	1	1	1	0	1	1	0	1	11
1111010001110010	9.578383973703072	9.542769602449004	9.460249514734102	9.527134363628726	0.02473958743491293	6.0	6.0	6.0	6.0	0.0	6.0	6.0	6.0	6.0	0.0	1	1	1	1	0	1	0	0	0	1	1	1	0	0	1	0	9
1111001011111011	9.548632454835822	9.493261786918342	9.56911393190109	9.537002724551751	0.0160199091990825	7.3788533668954575	7.016604052209005	7.2795049259584035	7.224987448354288	0.07641472155387495	6.0	6.0	6.0	6.0	0.0	1	1	1	1	0	0	1	0	1	1	1	1	1	0	1	1	12
1101101011011111	9.565676885779947	9.537664842219757	9.589213150007721	9.56418495933581	0.010535467022844927	7.281112335808183	6.999924036102704	6.823644860527335	7.034893744146074	0.09419508399719984	6.0	6.0	6.0	6.0	0.0	1	1	0	1	1	0	1	0	1	1	0	1	1	1	1	1	12
1101010011011001	9.533013354516322	9.511888658188765	9.465772741550069	9.503558251418385	0.014037875941771303	6.977439885095768	6.898922326789781	6.804094502933929	6.893485571606493	0.03543614940848003	6.0	6.0	6.0	6.0	0.0	1	1	0	1	0	1	0	0	1	1	0	1	1	0	0	1	9
1101000101100011	9.45995831001766	9.487301289413217	9.467881708654174	9.471713769361685	0.005743447679834847	6.0	6.0	6.0	6.0	0.0	6.0	6.0	6.0	6.0	0.0	1	1	0	1	0	0	0	1	0	1	1	0	0	0	1	1	8
1011100110101101	9.399038485094275	9.392435233569072	9.365848591824482	9.385774103495942	0.007172519829221027	6.0	6.0	6.0	6.0	0.0	6.0	6.0	6.0	6.0	0.0	1	0	1	1	1	0	0	1	1	0	1	0	1	1	0	1	10
1001011011111111	9.563451551052623	9.516330952013622	9.522027448915805	9.533936650660683	0.010499678789521212	6.0	6.0	6.0	6.0	0.0	6.0	6.0	6.0	6.0	0.0	1	0	0	1	0	1	1	0	1	1	1	1	1	1	1	1	12
0101010111011011	9.572038867166249	9.546747322786443	9.394530178599334	9.504438789517343	0.03920000556913963	7.124832732336304	6.899088519533737	7.030827706660659	7.018249652843568	0.04629393045499585	6.0	6.0	6.0	6.0	0.0	0	1	0	1	0	1	0	1	1	1	0	1	1	0	1	1	10
1111110101110000	9.674938746485482	9.685448928476587	9.536054344796062	9.632147339919378	0.034041674863806395	6.889474597045089	6.626621143929022	6.252838653760237	6.589644798244783	0.1306086831440063	6.0	6.0	6.0	6.0	0.0	1	1	1	1	1	1	0	1	0	1	1	1	0	0	0	0	10
1111110001111001	9.529560638199843	9.55224074926975	9.498427903904199	9.526743097124596	0.011029577544548037	6.9276212607525895	6.610678366805504	6.7229926060406955	6.753764077866262	0.06560406760080013	6.0	6.0	6.0	6.0	0.0	1	1	1	1	1	1	0	0	0	1	1	1	1	0	0	1	11
1111011011010010	9.643330209135767	9.50555895185105	9.521080871804859	9.556656677597227	0.030807083335344185	6.0483996704441685	6.0	6.0	6.01613322348139	0.011407911726088552	6.0	6.0	6.0	6.0	0.0	1	1	1	1	0	1	1	0	1	1	0	1	0	0	1	0	10
1111011011001101	9.580562225064991	9.519853509177963	9.56670153307268	9.555705755771877	0.012987605533736025	6.2788908777824295	6.191305617601054	6.0	6.156732165127828	0.05822588648173353	6.0	6.0	6.0	6.0	0.0	1	1	1	1	0	1	1	0	1	1	0	0	1	1	0	1	11
1111010101111001	9.478328717423466	9.475766065397627	9.502346255331974	9.485480346051022	0.005985899657477646	6.32155531760687	6.0	6.0	6.107185105868957	0.07579131520213721	6.0	6.0	6.0	6.0	0.0	1	1	1	1	0	1	0	1	0	1	1	1	1	0	0	1	11
1111000110100111	9.507484682303586	9.449276479454923	9.415490725090383	9.457417295616297	0.018997485389590115	6.0	6.0	6.0	6.0	0.0	6.0	6.0	6.0	6.0	0.0	1	1	1	1	0	0	0	1	1	0	1	0	0	1	1	1	10
1111000110011001	9.320974708461392	9.423003865932722	9.36691781138201	9.370298795258707	0.020860890571266933	6.0	6.0	6.0	6.0	0.0	6.0	6.0	6.0	6.0	0.0	1	1	1	1	0	0	0	1	1	0	0	1	1	0	0	1	9
1110101011111101	9.588887126655827	9.571529915415914	9.544578340407867	9.56833179415987	0.009114897324052598	6.0	6.0	6.0	6.0	0.0	6.0	6.0	6.0	6.0	0.0	1	1	1	0	1	0	1	0	1	1	1	1	1	1	0	1	12
1101110101011010	9.540791897955943	9.666145674860928	9.491969890700053	9.566302487838975	0.036679680101633715	6.0	6.0	6.0	6.0	0.0	6.0	6.0	6.0	6.0	0.0	1	1	0	1	1	1	0	1	0	1	0	1	1	0	1	0	10
1101100011010010	9.61892859973329	9.493771732996123	9.440296859986633	9.517665730905348	0.037428859104737665	7.1136525058827695	6.9911627511166365	6.5600936592792864	6.888302972092897	0.1187026746180374	6.0	6.0	6.0	6.0	0.0	1	1	0	1	1	0	0	0	1	1	0	1	0	0	1	0	8
1101000001010011	9.533349705745325	9.467003114232478	9.486433219535902	9.495595346504567	0.013924953496544797	6.0	6.0	6.0	6.0	0.0	6.0	6.0	6.0	6.0	0.0	1	1	0	1	0	0	0	0	0	1	0	1	0	0	1	1	7
1011101111100111	9.62119713622982	9.547029614065664	9.426848724466867	9.531691824920784	0.04004010930842826	6.787956033244875	6.891848714202308	6.914802654923588	6.86486913412359	0.027593597275888806	6.0	6.0	6.0	6.0	0.0	1	0	1	1	1	0	1	1	1	1	1	0	0	1	1	1	12
1011011111111011	9.543053450866731	9.498385546858797	9.573166634020186	9.538201877248571	0.015360697001270974	6.0	6.085401315319558	6.0	6.028467105106519	0.020129283061570035	6.0	6.0	6.0	6.0	0.0	1	0	1	1	0	1	1	1	1	1	1	1	1	0	1	1	13
1001010101010101	9.552553488980196	9.42115450035586	9.487185409046758	9.486964466127604	0.02682181998766676	6.0	6.0	6.0	6.0	0.0	6.0	6.0	6.0	6.0	0.0	1	0	0	1	0	1	0	1	0	1	0	1	0	1	0	1	8
0111110001010011	9.534907021738523	9.508820193105132	9.356184630089658	9.466637281644438	0.03941229045540694	6.828469013162955	6.6240356394785485	6.0848965183372625	6.512467056992922	0.1568229762150704	6.0	6.0	6.0	6.0	0.0	0	1	1	1	1	1	0	0	0	1	0	1	0	0	1	1	9
0111001011111101	9.460324054691624	9.453086726883596	9.367588401839377	9.426999727804866	0.021056962301431077	6.964802869530303	6.803896688447142	7.034362998617466	6.934354185531636	0.048259751689544474	6.0	6.0	6.0	6.0	0.0	0	1	1	1	0	0	1	0	1	1	1	1	1	1	0	1	11
0001110101111101	9.610492629654145	9.45301291240438	9.383819091384916	9.482441544481148	0.04742495216533361	6.0	6.0	6.0	6.0	0.0	6.0	6.0	6.0	6.0	0.0	0	0	0	1	1	1	0	1	0	1	1	1	1	1	0	1	10
0001000011011101	9.552693505857187	9.37453631232022	9.336613877951024	9.42128123204281	0.047101693244369365	6.0	6.0	6.0	6.0	0.0	6.0	6.0	6.0	6.0	0.0	0	0	0	1	0	0	0	0	1	1	0	1	1	1	0	1	7
1111111111101011	9.62439520784485	9.612194121344194	9.575063602370072	9.603884310519705	0.010489610269483191	7.851760855399822	7.738464596008992	7.958933301929172	7.849719584445995	0.045008772594647126	6.0	6.0	6.0	6.0	0.0	1	1	1	1	1	1	1	1	1	1	1	0	1	0	1	1	14
1111111100010011	9.359867677883983	9.526080670246172	9.347264414212551	9.411070920780903	0.04074338886625449	6.0	6.0	6.0	6.0	0.0	6.0	6.0	6.0	6.0	0.0	1	1	1	1	1	1	1	1	0	0	0	1	0	0	1	1	11
1111110111011110	9.601114116745537	9.544341398146075	9.507188157462087	9.5508812241179	0.019311475213955775	8.269181512022417	8.098088396279786	8.376303114207428	8.247857674169877	0.05728857777873393	6.0	6.0		6.0	0.0	1	1	1	1	1	1	0	1	1	1	0	1	1	1	1	0	13
1111100111010111	9.530172820783033	9.577658418073524	9.500611824216584	9.536147687691047	0.015868305318912805	8.352809642157611	7.892474957601983	8.129498616867219	8.124927738875604	0.09397931966257542	6.0	6.0	6.0	6.0	0.0	1	1	1	1	1	0	0	1	1	1	0	1	0	1	1	1	12
1111011111110101	9.627927937536313	9.575841307213867	9.558737747499094	9.587502330749759	0.014712835676006755	7.317129799083692	7.305158080711617	6.951923485749138	7.191403788514815	0.08470433092995767	6.0	6.0	6.0	6.0	0.0	1	1	1	1	0	1	1	1	1	1	1	1	0	1	0	1	13
1111010111101111	9.554712395674176	9.541109789109598	9.558888793955118	9.551570326246297	0.0037953415204578633	7.432239150987202	7.412510424635299	7.5786108689152805	7.474453481512594	0.037044740233448545	6.0	6.0	6.0	6.0	0.0	1	1	1	1	0	1	0	1	1	1	1	0	1	1	1	1	13
1111010001111011	9.554993073784619	9.444024436640062	9.506678296529444	9.501898602318041	0.022714326297867567	6.0	6.0	6.0	6.0	0.0	6.0	6.0	6.0	6.0	0.0	1	1	1	1	0	1	0	0	0	1	1	1	1	0	1	1	11
1111000001110100	9.596773386361626	9.410578116194358	9.417809141798942	9.475053548118309	0.043059766989824735	6.0	6.0	6.0	6.0	0.0	6.0	6.0	6.0	6.0	0.0	1	1	1	1	0	0	0	0	0	1	1	1	0	1	0	0	8
1111000001100001	9.530503723366703	9.432299077382359	9.554993845740407	9.505932215496488	0.026508868940006834	6.0	6.0	6.0	6.0	0.0	6.0	6.0	6.0	6.0	0.0	1	1	1	1	0	0	0	0	0	1	1	0	0	0	0	1	7
1101110001110001	9.648464898918727	9.539048523970266	9.519116867716962	9.568876763535316	0.028431265655394854	6.00724991599963	6.0	6.0	6.002416638666543	0.001708821588790351	6.0	6.0	6.0	6.0	0.0	1	1	0	1	1	1	0	0	0	1	1	1	0	0	0	1	9
1101100001000000	9.575628619391193	9.559438101328167	9.502210722263737	9.545759147661032	0.015747392560490493	6.0	6.0	6.0	6.0	0.0	6.0	6.0	6.0	6.0	0.0	1	1	0	1	1	0	0	0	0	1	0	0	0	0	0	0	5
1101010110011001	9.379129618943617	9.423688649052977	9.393713367010793	9.398843878335795	0.009274682392708433	6.0	6.0	6.0	6.0	0.0	6.0	6.0	6.0	6.0	0.0	1	1	0	1	0	1	0	1	1	0	0	1	1	0	0	1	9
1101001011100101	9.591351589165669	9.525173060858695	9.638995517260971	9.585173389095111	0.023336364728487314	6.877058246474259	6.67350014649109	6.285489105016526	6.612015832660625	0.12269457534644172	6.0	6.0	6.0	6.0	0.0	1	1	0	1	0	0	1	0	1	1	1	0	0	1	0	1	9
1001111110101010	9.63233855229822	9.565610182553195	9.451810258200489	9.549919664350634	0.03726540064983859	6.0	6.0	6.0	6.0	0.0	6.0	6.0	6.0	6.0	0.0	1	0	0	1	1	1	1	1	1	0	1	0	1	0	1	0	10
1001110010001101	9.511917311691032	9.442181635835897	9.508621884549429	9.487573610692118	0.016062578124439515	6.0	6.0	6.0	6.0	0.0	6.0	6.0	6.0	6.0	0.0	1	0	0	1	1	1	0	0	1	0	0	0	1	1	0	1	8
1001011011000011	9.591302660059434	9.521701790267386	9.459000701345678	9.524001717224166	0.02701826332279383	6.0	6.0	6.0	6.0	0.0	6.0	6.0	6.0	6.0	0.0	1	0	0	1	0	1	1	0	1	1	0	0	0	0	1	1	8
0110010011111101	9.54057313770464	9.46246206747152	9.41734408463458	9.473459763270247	0.025452772818159233	6.0	6.0	6.0	6.0	0.0	6.0	6.0	6.0	6.0	0.0	0	1	1	0	0	1	0	0	1	1	1	1	1	1	0	1	10
0110010011011111	9.510961272915079	9.434747949705248	9.402756370457832	9.449488531026054	0.02269375384770758	6.0	6.0	6.0	6.0	0.0	6.0	6.0	6.0	6.0	0.0	0	1	1	0	0	1	0	0	1	1	0	1	1	1	1	1	10
0100111011111101	9.634918655877136	9.556197723557178	9.481461168259733	9.557525849231348	0.03132789775055719	6.0	6.0	6.0	6.0	0.0	6.0	6.0	6.0	6.0	0.0	0	1	0	0	1	1	1	0	1	1	1	1	1	1	0	1	11
0011110101001011	9.612274164554762	9.556427991616829	9.338143252825484	9.502281802999024	0.05914078752964185	6.0	6.0	6.0	6.0	0.0	6.0	6.0	6.0	6.0	0.0	0	0	1	1	1	1	0	1	0	1	0	0	1	0	1	1	9
1111011011101101	9.560790807009985	9.512281849354187	9.527926019253425	9.533666225205865	0.010107688628756282	6.883524324614429	6.734280396704012	6.501038311481936	6.706281010933459	0.07869970538185395	6.0	6.0	6.0	6.0	0.0	1	1	1	1	0	1	1	0	1	1	1	0	1	1	0	1	12
1111001001010111	9.487140633684618	9.493096154321554	9.406204292856225	9.462147026954133	0.019816067471776954	6.0	6.0	6.0	6.0	0.0	6.0	6.0	6.0	6.0	0.0	1	1	1	1	0	0	1	0	0	1	0	1	0	1	1	1	10
1111000111101101	9.562287907837064	9.530573882175538	9.486666176620293	9.526509322210964	0.015502967693501915	7.484778242450634	7.237576751272749	7.305771340709268	7.342708778144217	0.05212233210332868	6.0	6.0	6.0	6.0	0.0	1	1	1	1	0	0	0	1	1	1	1	0	1	1	0	1	11
1101101111100101	9.529790736112632	9.53460070518771	9.518887310112266	9.527759583804203	0.0032868901455701685	7.316034065445707	7.078355724226132	7.146881388518603	7.180423726063481	0.04994424354084442	6.0	6.0	6.0	6.0	0.0	1	1	0	1	1	0	1	1	1	1	1	0	0	1	0	1	11
1101011101010101	9.551755384339108	9.51525214420394	9.567806614430252	9.544938047657766	0.010995075752066997	6.0	6.0	6.0	6.0	0.0	6.0	6.0	6.0	6.0	0.0	1	1	0	1	0	1	1	1	0	1	0	1	0	1	0	1	10
1101000111100110	9.605698364025043	9.616236599961567	9.511189048198364	9.577708004061659	0.023616174616212376	6.445406640158413	6.857138003318402	6.741837000547794	6.681460548008203	0.08671280746266662	6.0	6.0	6.0	6.0	0.0	1	1	0	1	0	0	0	1	1	1	1	0	0	1	1	0	9
1011111110101011	9.524810072546007	9.52159741708545	9.420255502574369	9.488887664068608	0.024273993224250084	6.0	6.0	6.0	6.0	0.0	6.0	6.0	6.0	6.0	0.0	1	0	1	1	1	1	1	1	1	0	1	0	1	0	1	1	12
1011110010010111	9.469063170306992	9.486149999597199	9.46002553660932	9.471746235504504	0.005416349027740509	6.0	6.0	6.0	6.0	0.0	6.0	6.0	6.0	6.0	0.0	1	0	1	1	1	1	0	0	1	0	0	1	0	1	1	1	10
0001011111001101	9.671045820336097	9.528022097060333	9.385503130204757	9.528190349200395	0.05828618790566595	6.0	6.0	6.0	6.0	0.0	6.0	6.0	6.0	6.0	0.0	0	0	0	1	0	1	1	1	1	1	0	0	1	1	0	1	9
1111101001100011	9.518421175530143	9.453458350939009	9.401719927791898	9.457866484753684	0.02387247033269307	6.0	6.0	6.0	6.0	0.0	6.0	6.0	6.0	6.0	0.0	1	1	1	1	1	0	1	0	0	1	1	0	0	0	1	1	10
1111011111100011	9.55291817376214	9.525940465301764	9.518073744050824	9.532310794371575	0.007460667863536057	6.536521380829487	6.638488127161678	6.316929057126943	6.497312855039369	0.06708581600131858	6.0	6.0	6.0	6.0	0.0	1	1	1	1	0	1	1	1	1	1	1	0	0	0	1	1	12
1111001011010111	9.540428941509548	9.584657756216627	9.501517320156351	9.542201339294175	0.016982535502212404	7.360456931804872	7.209898606154916	7.172221032537421	7.24752552349907	0.04066125740979622	6.0	6.0	6.0	6.0	0.0	1	1	1	1	0	0	1	0	1	1	0	1	0	1	1	1	11
1110010111011001	9.455262985726105	9.509653485316138	9.514207304260214	9.493041258434152	0.013388942784667294	6.0	6.0	6.0	6.0	0.0	6.0	6.0	6.0	6.0	0.0	1	1	1	0	0	1	0	1	1	1	0	1	1	0	0	1	10
1101111011010011	9.573469280313146	9.58430002169418	9.49849876686569	9.552089356291004	0.019075681271932817	7.276465900208943	7.289096919830673	7.164371230856083	7.243311350298566	0.028028385930951884	6.0	6.0	6.0	6.0	0.0	1	1	0	1	1	1	1	0	1	1	0	1	0	0	1	1	11
1101110001010011	9.549058341567251	9.536147708307654	9.477908862740287	9.521038304205064	0.015474617138983146	6.0	6.0	6.0	6.0	0.0	6.0	6.0	6.0	6.0	0.0	1	1	0	1	1	1	0	0	0	1	0	1	0	0	1	1	9
1101101001111101	9.408292808509934	9.466214517456939	9.432490510518061	9.435665945494979	0.011876402600007897	6.0	6.0	6.0	6.0	0.0	6.0	6.0	6.0	6.0	0.0	1	1	0	1	1	0	1	0	0	1	1	1	1	1	0	1	11
1101101001110010	9.50182816180036	9.550749628846038	9.509368835197604	9.520648875281333	0.010752960543444691	6.0	6.0	6.0	6.0	0.0	6.0	6.0	6.0	6.0	0.0	1	1	0	1	1	0	1	0	0	1	1	1	0	0	1	0	9
1101101001010101	9.415757738720046	9.32493700521783	9.346290285068926	9.362328343002268	0.0193864896477549	6.0	6.0	6.0	6.0	0.0	6.0	6.0	6.0	6.0	0.0	1	1	0	1	1	0	1	0	0	1	0	1	0	1	0	1	9
1101000110000011	9.427828157060953	9.432659508457512	9.422384716000359	9.42762412717294	0.0020985733708003555	6.0	6.0	6.0	6.0	0.0	6.0	6.0	6.0	6.0	0.0	1	1	0	1	0	0	0	1	1	0	0	0	0	0	1	1	7
1011110111000011	9.500960057093048	9.514251615372602	9.4771389387279	9.497450203731184	0.007676555161658199	7.617466555882792	7.495573064062494	7.817902527348474	7.643647382431254	0.06644314296778799	6.0	6.0	6.0	6.0	0.0	1	0	1	1	1	1	0	1	1	1	0	0	0	0	1	1	10
1011000111011111	9.518961546865127	9.5602788748578	9.479263308968632	9.519501243563854	0.016538333921934916	6.957333047084137	7.3253608153542755	7.2874843452822065	7.19005940257354	0.08264363672904587	6.0	6.0	6.0	6.0	0.0	1	0	1	1	0	0	0	1	1	1	0	1	1	1	1	1	11
1001111001111111	9.627650121938684	9.647568930415725	9.49663480028249	9.590617950878967	0.033475897249155895	6.0	6.0	6.0	6.0	0.0	6.0	6.0	6.0	6.0	0.0	1	0	0	1	1	1	1	0	0	1	1	1	1	1	1	1	12
1001101111100011	9.588021410258662	9.500104163487931	9.494548037813807	9.527557870520134	0.02140715363848861	6.78344493122084	6.5381308611347375	6.08362760960268	6.468401133986085	0.14496134372386593	6.0	6.0	6.0	6.0	0.0	1	0	0	1	1	0	1	1	1	1	1	0	0	0	1	1	10
1001001011110011	9.59418927606632	9.517552531564387	9.585794558535996	9.565845455388901	0.017159898451737706	6.0	6.0	6.0	6.0	0.0	6.0	6.0	6.0	6.0	0.0	1	0	0	1	0	0	1	0	1	1	1	1	0	0	1	1	9
0101110101110010	9.760599288571942	9.600010161546747	9.56254248766923	9.641050645929306	0.04295320150023841	6.008169291724848	6.460678700518295	6.0	6.156282664081047	0.10763316912926266	6.0	6.0	6.0	6.0	0.0	0	1	0	1	1	1	0	1	0	1	1	1	0	0	1	0	9
1111110001011011	9.504982380981929	9.614568357005174	9.470886848706119	9.530145862231075	0.030648530547170146	6.456729684483094	6.7686319914670445	6.1372350710264625	6.454198915658868	0.12888646255431815	6.0	6.0	6.0	6.0	0.0	1	1	1	1	1	1	0	0	0	1	0	1	1	0	1	1	11
1111101111110010	9.586196852723386	9.62069644359426	9.494589126830084	9.56716080771591	0.026606835251209736	7.543362721944122	7.401045167473622	7.4480162413372675	7.464141376918337	0.029604578969439983	6.0	6.0	6.0	6.0	0.0	1	1	1	1	1	0	1	1	1	1	1	1	0	0	1	0	12
1111101101011001	9.481726575763126	9.495880703083472	9.414157667041977	9.463921648629524	0.01782986832833473	6.0	6.0	6.0	6.0	0.0	6.0	6.0	6.0	6.0	0.0	1	1	1	1	1	0	1	1	0	1	0	1	1	0	0	1	11
1111010111001100	9.58220092158026	9.45818901052801	9.49412610826785	9.51150534679204	0.02604888663477548	6.717192062524082	7.024733776348728	6.868245694109587	6.870057177660798	0.06277995638211606	6.0	6.0	6.0	6.0	0.0	1	1	1	1	0	1	0	1	1	1	0	0	1	1	0	0	10
1111010001011001	9.510986398229534	9.496641483344932	9.521229684325698	9.509619188633387	0.005042268891208241	6.0	6.0	6.0	6.0	0.0	6.0	6.0	6.0	6.0	0.0	1	1	1	1	0	1	0	0	0	1	0	1	1	0	0	1	9
1101100111011010	9.619352088526211	9.571307758283666	9.483453834116348	9.558037893642075	0.02813405667104246	6.986476473413418	6.759992349406949	6.741642817558392	6.82937054679292	0.055671477532978214	6.0	6.0	6.0	6.0	0.0	1	1	0	1	1	0	0	1	1	1	0	1	1	0	1	0	10
1100011111001111	9.553257804926726	9.51456562536392	9.375439383021039	9.481087604437228	0.03817815956392971	6.0	6.0	6.0	6.0	0.0	6.0	6.0	6.0	6.0	0.0	1	1	0	0	0	1	1	1	1	1	0	0	1	1	1	1	11
1011111010100111	9.567855530704014	9.50972179293309	9.426427722479906	9.501335015372335	0.029020710315103594	6.0	6.0	6.0	6.0	0.0	6.0	6.0	6.0	6.0	0.0	1	0	1	1	1	1	1	0	1	0	1	0	0	1	1	1	11
1011111001100001	9.59742324067687	9.467721582174981	9.573380495416695	9.546175106089514	0.02816833316825734	6.0	6.0	6.0	6.0	0.0	6.0	6.0	6.0	6.0	0.0	1	0	1	1	1	1	1	0	0	1	1	0	0	0	0	1	9
1011000011011010	9.564977210342873	9.544049965120118	9.485964488919432	9.531663888127474	0.01671233932426046	7.0427149136677025	6.771503687159374	6.0	6.604739533609025	0.22085866897870993	6.0	6.0	6.0	6.0	0.0	1	0	1	1	0	0	0	0	1	1	0	1	1	0	1	0	8
1001110011111011	9.590222339488669	9.589559814077573	9.419998912709367	9.533260355425204	0.040044195458548246	7.275701666005719	7.384561817267617	7.565451395658917	7.40857162631075	0.05975098277607537	6.0	6.0	6.0	6.0	0.0	1	0	0	1	1	1	0	0	1	1	1	1	1	0	1	1	11
1001010111111101	9.656216709129627	9.505859065797905	9.54699763677664	9.569691137234722	0.03172302384007582	7.072837951788625	6.628911574667778	6.346322714969978	6.682690747142128	0.14951323624595517	6.0	6.0	6.0	6.0	0.0	1	0	0	1	0	1	0	1	1	1	1	1	1	1	0	1	11
1000010011110101	9.550803114141788	9.52091556874283	9.476832736644797	9.516183806509803	0.015191534743261079	6.0	6.0	6.0	6.0	0.0	6.0	6.0	6.0	6.0	0.0	1	0	0	0	0	1	0	0	1	1	1	1	0	1	0	1	8
0001111011010011	9.589030274125196	9.490761765599773	9.414257290787184	9.498016443504051	0.03576747053268382	6.082527922564847	6.5685464681106875	6.0	6.217024796891845	0.12541818615009773	6.0	6.0	6.0	6.0	0.0	0	0	0	1	1	1	1	0	1	1	0	1	0	0	1	1	9
0001110011111101	9.663287287312846	9.497836962784415	9.440402814675133	9.533842354924131	0.047243453220347315	7.012208793969173	7.637236602853322	7.51842691988309	7.389290772235195	0.1355064875086762	6.0	6.0	6.0	6.0	0.0	0	0	0	1	1	1	0	0	1	1	1	1	1	1	0	1	10
0001011101011011	9.626434362354274	9.473862008157075	9.33371656799776	9.47800431283637	0.05976871505963321	6.0	6.0	6.0	6.0	0.0	6.0	6.0	6.0	6.0	0.0	0	0	0	1	0	1	1	1	0	1	0	1	1	0	1	1	9
1111110101111101	9.558409354335325	9.586198761671614	9.491902224683566	9.545503446896836	0.019781645773682726	7.126152276195987	6.4627511537495135	6.465932921360179	6.684945450435226	0.15599152126248014	6.0	6.0	6.0	6.0	0.0	1	1	1	1	1	1	0	1	0	1	1	1	1	1	0	1	13
1111110010100001	9.484628346760696	9.448366910363008	9.419936581537325	9.450977279553676	0.013237362793828568	6.0	6.221400816722848	6.0	6.073800272240949	0.052184672954988506	6.0	6.0	6.0	6.0	0.0	1	1	1	1	1	1	0	0	1	0	1	0	0	0	0	1	9
1111110001111011	9.591519955539264	9.554643187544126	9.467658442777443	9.537940528620277	0.02596360496687771	7.047914578407183	7.021226340456673	6.849719466711638	6.972953461858498	0.043909051233046933	6.0	6.0	6.0	6.0	0.0	1	1	1	1	1	1	0	0	0	1	1	1	1	0	1	1	12
1111101011101110	9.558454075409207	9.544131554937564	9.602850268064065	9.568478632803613	0.012498937494999102	7.459558652397862	7.254260790881894	7.2872721014259625	7.333697181568573	0.04500605336219285	6.0	6.0	6.0	6.0	0.0	1	1	1	1	1	0	1	0	1	1	1	0	1	1	1	0	12
1111101011010100	9.608539657821911	9.502490017716251	9.507335481245585	9.539455052261248	0.0244451142811391	7.474182509289354	7.41957547047205	7.5177422387980934	7.470500072853166	0.02008045838817226	6.0	6.0	6.0	6.0	0.0	1	1	1	1	1	0	1	0	1	1	0	1	0	1	0	0	10
1111001011001110	9.536433725963738	9.539296745945098	9.484578689569505	9.520103053826112	0.012573348551139082	7.126751767278504	6.693398748432183	6.082746967036628	6.634299160915771	0.21412849594946395	6.0	6.0	6.0	6.0	0.0	1	1	1	1	0	0	1	0	1	1	0	0	1	1	1	0	10
1101111111001101	9.612212077808673	9.601813753064091	9.521978357356543	9.578668062743104	0.020154913842471082	7.6383837946280835	7.628144709725237	7.558290823141261	7.60827310916486	0.017794575025461095	6.0	6.0	6.0	6.0	0.0	1	1	0	1	1	1	1	1	1	1	0	0	1	1	0	1	12
1101110111010000	9.599320340458917	9.539300645480324	9.517512423063565	9.552044469667601	0.017296134579381072	7.497813970459252	7.562749051581423	7.545999508826256	7.535520843622311	0.0137628304285371	6.0	6.0	6.0	6.0	0.0	1	1	0	1	1	1	0	1	1	1	0	1	0	0	0	0	9
1101110010011011	9.42341916485873	9.485407136196402	9.42150955334801	9.443445284801047	0.014840874768831568	6.0	6.0	6.0	6.0	0.0	6.0	6.0	6.0	6.0	0.0	1	1	0	1	1	1	0	0	1	0	0	1	1	0	1	1	10
1101010001101101	9.490651162519748	9.453892303386622	9.484051500038992	9.476198321981789	0.008000601387717429	6.0	6.0	6.0	6.0	0.0	6.0	6.0	6.0	6.0	0.0	1	1	0	1	0	1	0	0	0	1	1	0	1	1	0	1	9
1011011101010101	9.543330710743971	9.387458257478569	9.568486861384716	9.499758609869085	0.04003484906728272	6.0	6.0	6.0	6.0	0.0	6.0	6.0	6.0	6.0	0.0	1	0	1	1	0	1	1	1	0	1	0	1	0	1	0	1	10
1010001011001101	9.466620024804314	9.518436113493367	9.497001137875985	9.494019092057888	0.01062933213411418	6.0	6.0	6.0	6.0	0.0	6.0	6.0	6.0	6.0	0.0	1	0	1	0	0	0	1	0	1	1	0	0	1	1	0	1	8
1001111111010011	9.594687925952087	9.54489004902058	9.539834422177073	9.559804132383247	0.01237638295983051	7.127712672223978	7.277228832605917	6.960746539111876	7.121896014647256	0.06463440215658581	6.0	6.0	6.0	6.0	0.0	1	0	0	1	1	1	1	1	1	1	0	1	0	0	1	1	11
1001111010001111	9.546745375736274	9.449968347236453	9.497103594720386	9.497939105897705	0.019756736701310014	6.0	6.0	6.0	6.0	0.0	6.0	6.0	6.0	6.0	0.0	1	0	0	1	1	1	1	0	1	0	0	0	1	1	1	1	10
0111000111010011	9.498039124941107	9.505941056367863	9.432983239929301	9.478987807079422	0.016344852803818078	6.950878667599954	6.851118811904506	7.071290413250407	6.957762630918289	0.04500819411142578	6.0	6.0	6.0	6.0	0.0	0	1	1	1	0	0	0	1	1	1	0	1	0	0	1	1	9
0101011001010111	9.648276414008269	9.51777765904744	9.378720588636414	9.514924887230707	0.05503209590510831	6.0	6.0	6.0	6.0	0.0	6.0	6.0	6.0	6.0	0.0	0	1	0	1	0	1	1	0	0	1	0	1	0	1	1	1	9
0101000101010001	9.4736977435161	9.454389422670658	9.313818063731542	9.413968409972766	0.035627170583337815	6.0	6.0	6.0	6.0	0.0	6.0	6.0	6.0	6.0	0.0	0	1	0	1	0	0	0	1	0	1	0	1	0	0	0	1	6
0100010111100101	9.637775842020833	9.50053947159208	9.53713116578082	9.558482159797911	0.029012508943709128	6.0	6.0	6.0	6.0	0.0	6.0	6.0	6.0	6.0	0.0	0	1	0	0	0	1	0	1	1	1	1	0	0	1	0	1	8
0001110001111101	9.568752592322022	9.429173091761152	9.381461969831154	9.45979588463811	0.03973403432185695	6.0	6.0	6.0	6.0	0.0	6.0	6.0	6.0	6.0	0.0	0	0	0	1	1	1	0	0	0	1	1	1	1	1	0	1	9
1111101110010010	9.425022694356525	9.489090884022763	9.348304531524994	9.42080603663476	0.028776536779592583	6.0	6.0	6.0	6.0	0.0	6.0	6.0	6.0	6.0	0.0	1	1	1	1	1	0	1	1	1	0	0	1	0	0	1	0	10
1111101101111101	9.483240304216382	9.493076850534356	9.457878595029113	9.478065249926617	0.007414121523929909	6.0	6.0	6.0	6.0	0.0	6.0	6.0	6.0	6.0	0.0	1	1	1	1	1	0	1	1	0	1	1	1	1	1	0	1	13
1111100011001111	9.522254174847516	9.53507798132708	9.480645095203077	9.512659083792558	0.011617401475171343	7.591817748706647	7.505559868166075	7.853771247155759	7.650382954676161	0.07403287966298377	6.0	6.0	6.0	6.0	0.0	1	1	1	1	1	0	0	0	1	1	0	0	1	1	1	1	11
1111010011011110	9.495552088404047	9.563415091732043	9.514593264422848	9.524520148186312	0.014290171862238774	7.4059573543034425	7.2882755009210936	7.1203104606641405	7.271514438629559	0.05860778797552023	6.0	6.0	6.0	6.0	0.0	1	1	1	1	0	1	0	0	1	1	0	1	1	1	1	0	11
1111001001110011	9.507544175553948	9.538625866855211	9.481236774077724	9.509135605495628	0.011728004088507037	6.0	6.0	6.0	6.0	0.0	6.0	6.0	6.0	6.0	0.0	1	1	1	1	0	0	1	0	0	1	1	1	0	0	1	1	10
1111000110010101	9.382004779495352	9.302033590798674	9.433470985176394	9.372503118490139	0.027039040699189457	6.0	6.0	6.0	6.0	0.0	6.0	6.0	6.0	6.0	0.0	1	1	1	1	0	0	0	1	1	0	0	1	0	1	0	1	9
1011101011111101	9.53916268359742	9.599361970944443	9.480444739858587	9.53965646480015	0.0242745059242162	7.260527010921268	7.3048745156215675	7.396751284432889	7.320717603658575	0.02836522446104705	6.0	6.0	6.0	6.0	0.0	1	0	1	1	1	0	1	0	1	1	1	1	1	1	0	1	12
1011100011111010	9.599626855071373	9.571964068755825	9.591152558007412	9.587581160611537	0.005786098227711471	7.202259297718	7.2953768138206385	6.877077835472634	7.124904649003757	0.089657975179776	6.0	6.0	6.0	6.0	0.0	1	0	1	1	1	0	0	0	1	1	1	1	1	0	1	0	10
1011011111010001	9.563084998291734	9.497510465067325	9.397235319814369	9.485943594391143	0.034100032589649526	6.0	6.0	6.0	6.0	0.0	6.0	6.0	6.0	6.0	0.0	1	0	1	1	0	1	1	1	1	1	0	1	0	0	0	1	10
1011001111101101	9.650317021404039	9.598880436466262	9.561104917235133	9.603434125035145	0.018281374593867042	6.878296892051504	6.599261554508352	6.351380931101136	6.609646459220332	0.1076189203938834	6.0	6.0	6.0	6.0	0.0	1	0	1	1	0	0	1	1	1	1	1	0	1	1	0	1	11
1001100101011101	9.528901051010935	9.495974122501234	9.40171514429348	9.475530105935217	0.026949125146279625	6.0	6.0	6.0	6.0	0.0	6.0	6.0	6.0	6.0	0.0	1	0	0	1	1	0	0	1	0	1	0	1	1	1	0	1	9
1001000110011001	9.384349819857873	9.351786417989505	9.35745243211129	9.364529556652888	0.007102324198729893	6.0	6.0	6.0	6.0	0.0	6.0	6.0	6.0	6.0	0.0	1	0	0	1	0	0	0	1	1	0	0	1	1	0	0	1	7
0101111001100101	9.671663054389674	9.425201169355937	9.536819716673104	9.544561313472906	0.050383222131899164	6.0	6.0	6.0	6.0	0.0	6.0	6.0	6.0	6.0	0.0	0	1	0	1	1	1	1	0	0	1	1	0	0	1	0	1	9
0101110010010111	9.47249648533786	9.379016934383564	9.306903260136906	9.38613889328611	0.03389523265905951	6.0	6.0	6.0	6.0	0.0	6.0	6.0	6.0	6.0	0.0	0	1	0	1	1	1	0	0	1	0	0	1	0	1	1	1	9
0101011101101011	9.52292557640722	9.496477278848422	9.341117600499757	9.453506818585133	0.04010066576197395	6.0	6.0	6.0	6.0	0.0	6.0	6.0	6.0	6.0	0.0	0	1	0	1	0	1	1	1	0	1	1	0	1	0	1	1	10
0011010111010100	9.544032107243918	9.494596535249993	9.451640239471098	9.496756293988335	0.018874863028171658	6.6633919871643075	6.72314670795646	6.524045979874162	6.636861558331643	0.041709656598240906	6.0	6.0	6.0	6.0	0.0	0	0	1	1	0	1	0	1	1	1	0	1	0	1	0	0	8
0001111101010111	9.627099963730293	9.535701108725476	9.384072338605943	9.515624470353904	0.050113055849785926	6.0	6.0	6.0	6.0	0.0	6.0	6.0	6.0	6.0	0.0	0	0	0	1	1	1	1	1	0	1	0	1	0	1	1	1	10
0001011101010011	9.577261457835336	9.422942014969484	9.375079197882195	9.458427556895671	0.04313512552488638	6.0	6.0	6.0	6.0	0.0	6.0	6.0	6.0	6.0	0.0	0	0	0	1	0	1	1	1	0	1	0	1	0	0	1	1	8
1111101111101110	9.596544666707807	9.559359976455086	9.474527145107961	9.543477262756952	0.025531889668134907	7.3679739500154735	7.2936565663285275	7.371191135176586	7.344273883840195	0.017907969334665826	6.0	6.0	6.0	6.0	0.0	1	1	1	1	1	0	1	1	1	1	1	0	1	1	1	0	13
1111101001000010	9.482193054907881	9.536826259089404	9.518922029833737	9.51264711461034	0.011370485701884687	6.0	6.0	6.0	6.0	0.0	6.0	6.0	6.0	6.0	0.0	1	1	1	1	1	0	1	0	0	1	0	0	0	0	1	0	8
1111100101111101	9.527592687004848	9.478728765675443	9.474032617898528	9.493451356859607	0.012108786541532818	6.0	6.0	6.0	6.0	0.0	6.0	6.0	6.0	6.0	0.0	1	1	1	1	1	0	0	1	0	1	1	1	1	1	0	1	12
1111010011010111	9.558204975284461	9.525241168553443	9.467200980076289	9.516882374638064	0.018809722055150524	7.989143188357582	7.790182056493412	7.746616255386543	7.8419805000791785	0.052784368539236466	6.0	6.0	6.0	6.0	0.0	1	1	1	1	0	1	0	0	1	1	0	1	0	1	1	1	11
1111001111111110	9.566028548349731	9.574392797635092	9.45336695186742	9.531262765950748	0.02759320132238257	6.9797785510324415	6.866815868016761	6.784228311719215	6.876940910256138	0.04007672097391654	6.0	6.0	6.0	6.0	0.0	1	1	1	1	0	0	1	1	1	1	1	1	1	1	1	0	13
1111000011110101	9.610151669707768	9.516172945793326	9.552060561453674	9.55946172565159	0.0193609704507124	7.98302474421821	7.668688204241246	7.671394021576755	7.7743689900120705	0.07377301695557244	6.0	6.0	6.0	6.0	0.0	1	1	1	1	0	0	0	0	1	1	1	1	0	1	0	1	10
1101111001110111	9.578830814090928	9.610691161311005	9.541042243982963	9.576854739794966	0.014234181708476007	6.0	6.0	6.0	6.0	0.0	6.0	6.0	6.0	6.0	0.0	1	1	0	1	1	1	1	0	0	1	1	1	0	1	1	1	12
1101110001010001	9.611771241777967	9.599520080533466	9.488504009086943	9.566598443799458	0.027723570861152944	6.0	6.0	6.0	6.0	0.0	6.0	6.0	6.0	6.0	0.0	1	1	0	1	1	1	0	0	0	1	0	1	0	0	0	1	8
1101100101110001	9.525990176884012	9.517441898003673	9.441094828228925	9.49484230103887	0.019082546096043842	6.0	6.0	6.0	6.0	0.0	6.0	6.0	6.0	6.0	0.0	1	1	0	1	1	0	0	1	0	1	1	1	0	0	0	1	9
1101011111100000	9.654816849563288	9.563294557325944	9.559620156091324	9.592577187660185	0.022017822104935855	6.0	6.0	6.0	6.0	0.0	6.0	6.0	6.0	6.0	0.0	1	1	0	1	0	1	1	1	1	1	1	0	0	0	0	0	9
1001111110111111	9.6000124410412	9.475826128541444	9.409212171289198	9.495016913623948	0.03953353093350263	6.0	6.0	6.0	6.0	0.0	6.0	6.0	6.0	6.0	0.0	1	0	0	1	1	1	1	1	1	0	1	1	1	1	1	1	13
1000010111010101	9.688301488675476	9.534506537418556	9.495262925730755	9.572690317274928	0.04165227580623248	6.0	6.0	6.0	6.0	0.0	6.0	6.0	6.0	6.0	0.0	1	0	0	0	0	1	0	1	1	1	0	1	0	1	0	1	8
0101011111010111	9.551578797193466	9.509362934542617	9.477345050457746	9.512762260731277	0.015200487122174908	6.0	6.0	6.0	6.0	0.0	6.0	6.0	6.0	6.0	0.0	0	1	0	1	0	1	1	1	1	1	0	1	0	1	1	1	11
0011110001110111	9.570759057513783	9.41882570435782	9.383722214563543	9.457768992145049	0.04058556784325634	6.0	6.0	6.0	6.0	0.0	6.0	6.0	6.0	6.0	0.0	0	0	1	1	1	1	0	0	0	1	1	1	0	1	1	1	10
0011010111010111	9.549441065851234	9.435079198446893	9.384444942977689	9.456321735758605	0.03450691762628927	6.488883445834714	6.8709879044018844	6.911909426306839	6.757260258847812	0.09525249608370294	6.0	6.0	6.0	6.0	0.0	0	0	1	1	0	1	0	1	1	1	0	1	0	1	1	1	10
0010010101011111	9.459369705398851	9.360402073020065	9.322237549241256	9.380669775886725	0.028894612813135587	6.0	6.0	6.0	6.0	0.0	6.0	6.0	6.0	6.0	0.0	0	0	1	0	0	1	0	1	0	1	0	1	1	1	1	1	9
0010010011010001	9.611882630027026	9.454822457969897	9.37597906444711	9.480894717481343	0.04902795988065313	6.0	6.0	6.0	6.0	0.0	6.0	6.0	6.0	6.0	0.0	0	0	1	0	0	1	0	0	1	1	0	1	0	0	0	1	6
1111111101011010	9.537996914226218	9.67881589022234	9.618563799736917	9.61179220139516	0.028844083472541665	6.0	6.0	6.0	6.0	0.0	6.0	6.0	6.0	6.0	0.0	1	1	1	1	1	1	1	1	0	1	0	1	1	0	1	0	12
1111110111110001	9.59018810504534	9.522994907010636	9.539184633174203	9.550789215076726	0.014316256531079395	8.709156135213371	8.81897814760731	8.843051482750887	8.790395255190523	0.029139684644914197	7.057145570566555	6.888608565566635	7.113013866415009	7.019589334182733	0.04769222146692343	1	1	1	1	1	1	0	1	1	1	1	1	0	0	0	1	12
1111110110101100	9.546086170507113	9.492344791755949	9.472376973407565	9.503602645223543	0.01556339660222219	6.626970642741157	6.685358847249505	6.0	6.437443163330221	0.15511806603610567	6.0	6.0	6.0	6.0	0.0	1	1	1	1	1	1	0	1	1	0	1	0	1	1	0	0	11
1111110101010100	9.594818948135467	9.556405318978381	9.610819339287263	9.58734786880037	0.011416976915740559	6.722522016110902	6.0	6.0	6.240840672036967	0.17030007238286482	6.0	6.0	6.0	6.0	0.0	1	1	1	1	1	1	0	1	0	1	0	1	0	1	0	0	10
1111011111011010	9.59005663756289	9.511583681151873	9.492736502268594	9.531458940327786	0.021071590783593462	6.314342426972884	6.464623662375412	6.031434730549855	6.270133606632716	0.08979511633986889	6.0	6.0	6.0	6.0	0.0	1	1	1	1	0	1	1	1	1	1	0	1	1	0	1	0	12
1111011011101011	9.555762776671687	9.58313126917974	9.557818033337934	9.56557069306312	0.006222759237290808	6.094495642377384	6.351053827559428	6.0	6.148516489978938	0.07416017174863686	6.0	6.0	6.0	6.0	0.0	1	1	1	1	0	1	1	0	1	1	1	0	1	0	1	1	12
1111010011111101	9.587398351448172	9.482758260275698	9.574581541826095	9.548246051183321	0.02330077152046191	7.9921992506986985	8.073637390358291	8.111263847654651	8.059033496237214	0.024846360748593917	6.0	6.0	6.0	6.0	0.0	1	1	1	1	0	1	0	0	1	1	1	1	1	1	0	1	12
1111001111001100	9.563892449333876	9.643154125266557	9.51984961775867	9.5756320641197	0.02550935877095023	7.181446535318741	6.890223512256296	6.394503650799466	6.822057899458168	0.16243187749022014	6.0	6.0	6.0	6.0	0.0	1	1	1	1	0	0	1	1	1	1	0	0	1	1	0	0	10
1111000110111001	9.445150052414496	9.347038571530343	9.406331298876148	9.399506640940329	0.020171752680733603	6.0	6.0	6.0	6.0	0.0	6.0	6.0	6.0	6.0	0.0	1	1	1	1	0	0	0	1	1	0	1	1	1	0	0	1	10
1101110010100111	9.453808042357966	9.463723924151434	9.45332394924814	9.45695197191918	0.002396284947986895	6.0	6.0	6.0	6.0	0.0	6.0	6.0	6.0	6.0	0.0	1	1	0	1	1	1	0	0	1	0	1	0	0	1	1	1	10
1101010101101101	9.581742017011868	9.430044005076804	9.494969981828925	9.502252001305864	0.03107207364072982	6.0	6.0	6.0	6.0	0.0	6.0	6.0	6.0	6.0	0.0	1	1	0	1	0	1	0	1	0	1	1	0	1	1	0	1	10
1011111101011101	9.640920010234764	9.595593626582858	9.479815635286167	9.572109757367928	0.033917237485464484	6.0	6.0	6.0	6.0	0.0	6.0	6.0	6.0	6.0	0.0	1	0	1	1	1	1	1	1	0	1	0	1	1	1	0	1	12
1011101001011011	9.405147121092208	9.546694427434458	9.40107775219507	9.45097310024058	0.03385279235312689	6.0	6.0	6.0	6.0	0.0	6.0	6.0	6.0	6.0	0.0	1	0	1	1	1	0	1	0	0	1	0	1	1	0	1	1	10
1011011011010010	9.560951233479035	9.461385248956883	9.414496423317964	9.478944301917961	0.030532750477960183	6.0	6.0	6.0	6.0	0.0	6.0	6.0	6.0	6.0	0.0	1	0	1	1	0	1	1	0	1	1	0	1	0	0	1	0	9
1001111110111011	9.622031032515713	9.48895515839015	9.493257041962632	9.534747744289499	0.030871793634462696	6.0	6.0	6.0	6.0	0.0	6.0	6.0	6.0	6.0	0.0	1	0	0	1	1	1	1	1	1	0	1	1	1	0	1	1	12
0111110110011110	9.527384698544775	9.469529581248418	9.38221983584594	9.459711371879711	0.029834284715739425	6.536807041461571	6.698714416165725		6.617760728813648	0.04673863318461451	6.0	6.0	6.0	6.0	0.0	0	1	1	1	1	1	0	1	1	0	0	1	1	1	1	0	11
0001000101111011	9.570988152859266	9.470821975332166	9.372558697936984	9.47145627537614	0.04050486369478326	6.0	6.0	6.0	6.0	0.0	6.0	6.0	6.0	6.0	0.0	0	0	0	1	0	0	0	1	0	1	1	1	1	0	1	1	8
1111111001011110	9.61283865863942	9.623203190357124	9.603132501128187	9.613058116708244	0.004097646944978012	6.0	6.0	6.0	6.0	0.0	6.0	6.0	6.0	6.0	0.0	1	1	1	1	1	1	1	0	0	1	0	1	1	1	1	0	12
1111111001000010	9.618289732911173	9.552653675106187	9.570204354883494	9.580382587633617	0.01387275710088912	6.0	6.0	6.0	6.0	0.0	6.0	6.0	6.0	6.0	0.0	1	1	1	1	1	1	1	0	0	1	0	0	0	0	1	0	9
1111110011100011	9.5611349582159	9.538668128537461	9.48256307462322	9.527455387125528	0.016521094598036315	8.005462052314327	8.057562814268152	8.159922738088731	8.074315868223737	0.03208069116853076	6.0	6.0	6.0	6.0	0.0	1	1	1	1	1	1	0	0	1	1	1	0	0	0	1	1	11
1111101010001100	9.461028263974644	9.452112594391783	9.423941068324527	9.445693975563652	0.00790320632236411	6.0	6.0	6.0	6.0	0.0	6.0	6.0	6.0	6.0	0.0	1	1	1	1	1	0	1	0	1	0	0	0	1	1	0	0	9
1111101001110011	9.511391750370137	9.521266752482047	9.417591887425653	9.483416796759279	0.023359751472931123	6.0	6.0	6.0	6.0	0.0	6.0	6.0	6.0	6.0	0.0	1	1	1	1	1	0	1	0	0	1	1	1	0	0	1	1	11
1111011111011001	9.605996866739655	9.583836674207783	9.534132874147376	9.574655471698271	0.015024031956980769	7.081716236270986	7.097422450960178	6.727902895845617	6.969013861025594	0.08530586580308222	6.0	6.0	6.0	6.0	0.0	1	1	1	1	0	1	1	1	1	1	0	1	1	0	0	1	12
1111011011110011	9.47894467531583	9.534420105793544	9.528653143845263	9.514005974984878	0.012451810533615573	6.9551462882290815	6.901360375011968	7.008718016285707	6.955074893175585	0.021914301296586645	6.0	6.0	6.0	6.0	0.0	1	1	1	1	0	1	1	0	1	1	1	1	0	0	1	1	12
1111010111010001	9.547693607341216	9.501299828824447	9.486009909951267	9.511667782038977	0.013113863347095108	8.349935260610362	8.01559955156191	8.025508857448813	8.130347889873695	0.07766220512157318	6.0	6.0	6.0	6.0	0.0	1	1	1	1	0	1	0	1	1	1	0	1	0	0	0	1	10
1111010111001001	9.60590194648026	9.536991456905971	9.446475676234408	9.52978969320688	0.03264220928340338	7.395158784151668	6.993164419374733	7.326760900965956	7.238361368164118	0.0878072940950714	6.0	6.0	6.0	6.0	0.0	1	1	1	1	0	1	0	1	1	1	0	0	1	0	0	1	10
1111010010001101	9.40700024738048	9.298367920802075	9.408510095557366	9.371292754579974	0.0257846641970569	6.0	6.0	6.0	6.0	0.0	6.0	6.0	6.0	6.0	0.0	1	1	1	1	0	1	0	0	1	0	0	0	1	1	0	1	9
1111001111101011	9.561846965389698	9.53194628836668	9.513159512758484	9.535650922171621	0.010024222701791733	6.994056208456477	6.831642037487217	7.104311855694108	6.976670033879267	0.05599689982500006	6.0	6.0	6.0	6.0	0.0	1	1	1	1	0	0	1	1	1	1	1	0	1	0	1	1	12
1111000111111001	9.537497898293747	9.516017631295448	9.479731479568617	9.511082336385938	0.011919924740846348	7.82382283578887	7.720940758951285	7.753842605200697	7.76620206664695	0.021450515335824958	6.0	6.0	6.0	6.0	0.0	1	1	1	1	0	0	0	1	1	1	1	1	1	0	0	1	11
1101111101111010	9.624340359266997	9.64099490103365	9.344831294771677	9.536722185024107	0.0679287969884242	6.0	6.0	6.0	6.0	0.0	6.0	6.0	6.0	6.0	0.0	1	1	0	1	1	1	1	1	0	1	1	1	1	0	1	0	12
1101011110011011	9.447091319621329	9.418680615781996	9.427255351351064	9.431009095584796	0.005949229221655179	6.0	6.0	6.0	6.0	0.0	6.0	6.0	6.0	6.0	0.0	1	1	0	1	0	1	1	1	1	0	0	1	1	0	1	1	11
1101011001001101	9.488213893008519	9.43925318683014	9.470298193010457	9.465921757616371	0.010113131541386685	6.0	6.0	6.0	6.0	0.0	6.0	6.0	6.0	6.0	0.0	1	1	0	1	0	1	1	0	0	1	0	0	1	1	0	1	9
1101000111110011	9.584970461222417	9.598586374073577	9.490463344558083	9.558006726618027	0.024041386592582675	6.939912385578553	6.829227353044318	6.894397276081802	6.887845671568225	0.022711915918202197	6.0	6.0	6.0	6.0	0.0	1	1	0	1	0	0	0	1	1	1	1	1	0	0	1	1	10
1011101011010001	9.525009287834004	9.49455630123191	9.458249905510698	9.49260516485887	0.013644650856086437	7.4207910295547865	6.951442976500053	7.1983037627900375	7.190179256281625	0.09584832152162001	6.0	6.0	6.0	6.0	0.0	1	0	1	1	1	0	1	0	1	1	0	1	0	0	0	1	9
1011001111110101	9.580010880347068	9.500619790291477	9.538256746525636	9.539629139054727	0.016212900681217605	6.897027453179161	6.746029797660624	7.0426427856910205	6.895233345510268	0.06054919526553835	6.0	6.0	6.0	6.0	0.0	1	0	1	1	0	0	1	1	1	1	1	1	0	1	0	1	11
1011000111001111	9.525367188986335	9.548303445886702	9.49055393551253	9.521408190128524	0.011870879924429124	6.783887348449942	6.705685874447192	6.83467822918079	6.774750484025975	0.02652787406218875	6.0	6.0	6.0	6.0	0.0	1	0	1	1	0	0	0	1	1	1	0	0	1	1	1	1	10
1011000001111011	9.46265222224897	9.448628455204336	9.415182470367114	9.442154382606807	0.009956401189936384	6.0	6.0	6.0	6.0	0.0	6.0	6.0	6.0	6.0	0.0	1	0	1	1	0	0	0	0	0	1	1	1	1	0	1	1	9
0101011011111001	9.552497082731279	9.517120352712519	9.494506070671983	9.521374502038592	0.011932537518494947	6.0381381485797	6.400434730151421	6.0	6.146190959577041	0.09022522813417223	6.0	6.0	6.0	6.0	0.0	0	1	0	1	0	1	1	0	1	1	1	1	1	0	0	1	10
0101010101011111	9.513546460407284	9.476038296883909	9.481894385351133	9.49049304754744	0.008237802360649513	6.0	6.0	6.0	6.0	0.0	6.0	6.0	6.0	6.0	0.0	0	1	0	1	0	1	0	1	0	1	0	1	1	1	1	1	10
0101000001111011	9.528641181473397	9.43201044839352	9.381829169586752	9.44749359981789	0.030463742635231095	6.0	6.0	6.0	6.0	0.0	6.0	6.0	6.0	6.0	0.0	0	1	0	1	0	0	0	0	0	1	1	1	1	0	1	1	8
0100011011111101	9.566518238222438	9.486216070770704	9.551930116531397	9.534888141841513	0.01746392090549142	6.0	6.0	6.0	6.0	0.0	6.0	6.0	6.0	6.0	0.0	0	1	0	0	0	1	1	0	1	1	1	1	1	1	0	1	10
1111111101111010	9.679394715426687	9.716668938390155	9.518005567792452	9.638023073869766	0.04310934401446699	6.0	6.0	6.0	6.0	0.0	6.0	6.0	6.0	6.0	0.0	1	1	1	1	1	1	1	1	0	1	1	1	1	0	1	0	13
1111110011111100	9.615788433733584	9.521653722091921	9.503123929830963	9.54685536188549	0.024663281060852152	8.702194821894016	8.384196361554228	8.236034294009269	8.440808492485838	0.09723691811404932	6.0	6.0	6.0	6.0	0.0	1	1	1	1	1	1	0	0	1	1	1	1	1	1	0	0	12
1111110001111100	9.674127378548624	9.529286281204312	9.513868745738712	9.572427468497215	0.03609381036111915	7.017720900946691	6.654987151364215	6.505809302764071	6.726172451691659	0.1074816893905674	6.0	6.0	6.0	6.0	0.0	1	1	1	1	1	1	0	0	0	1	1	1	1	1	0	0	11
1111100110011101	9.423523983821283	9.39307467149277	9.309652873652071	9.37541717632204	0.02406760542226285	6.0	6.0	6.0	6.0	0.0	6.0	6.0	6.0	6.0	0.0	1	1	1	1	1	0	0	1	1	0	0	1	1	1	0	1	11
1110010111101101	9.462171868220693	9.53490426347862	9.455003944996506	9.48402669223194	0.018047346170594877	6.0	6.0	6.0	6.0	0.0	6.0	6.0	6.0	6.0	0.0	1	1	1	0	0	1	0	1	1	1	1	0	1	1	0	1	11
1101111011011011	9.584506621127467	9.603382728943043	9.42425038104398	9.537379910371497	0.040182489274901534	7.285448782027665	7.239066713088946	7.327460021524622	7.283991838880411	0.01805055980919469	6.0	6.0	6.0	6.0	0.0	1	1	0	1	1	1	1	0	1	1	0	1	1	0	1	1	12
1101111001100101	9.637189871410992	9.597704830532836	9.515241323761481	9.583378675235103	0.025402726601250702	6.0	6.0	6.0	6.0	0.0	6.0	6.0	6.0	6.0	0.0	1	1	0	1	1	1	1	0	0	1	1	0	0	1	0	1	10
1101110011011011	9.551406129787726	9.576966270544514	9.490090089857636	9.53948749672996	0.018227305767076523	7.598957496753679	7.657565447612407	7.734486174781622	7.66366970638257	0.027748730071093002	6.0	6.0	6.0	6.0	0.0	1	1	0	1	1	1	0	0	1	1	0	1	1	0	1	1	11
1101110010101101	9.524792725900273	9.581950260823096	9.396210391900166	9.500984459541177	0.038837159798201015	6.0	6.0	6.0	6.0	0.0	6.0	6.0	6.0	6.0	0.0	1	1	0	1	1	1	0	0	1	0	1	0	1	1	0	1	10
1101101110111111	9.401336817069156	9.341027783187599	9.30678687468091	9.349717158312556	0.019542909334128618	6.0	6.0	6.0	6.0	0.0	6.0	6.0	6.0	6.0	0.0	1	1	0	1	1	0	1	1	1	0	1	1	1	1	1	1	13
1101101101101101	9.366717742579633	9.427060369594216	9.379277867554096	9.391018659909314	0.01299803070085065	6.0	6.0	6.0	6.0	0.0	6.0	6.0	6.0	6.0	0.0	1	1	0	1	1	0	1	1	0	1	1	0	1	1	0	1	11
1101000111110101	9.552947792963373	9.497866026350296	9.547591737151974	9.532801852155215	0.012399971619372004	7.006819421854267	6.63160667803954	6.514071448904362	6.717499182932722	0.1050660768351511	6.0	6.0	6.0	6.0	0.0	1	1	0	1	0	0	0	1	1	1	1	1	0	1	0	1	10
1000010111010001	9.625273724417807	9.509622270266023	9.486539848705279	9.540478614463035	0.030347590652467088	6.0	6.0	6.0	6.0	0.0	6.0	6.0	6.0	6.0	0.0	1	0	0	0	0	1	0	1	1	1	0	1	0	0	0	1	7
0111110101101011	9.56954610974341	9.511883344563156	9.388603166122145	9.490010873476237	0.037735683720602604	6.790296798063433	6.633600050241573	6.023208913158827	6.48236858715461	0.16545854081029018	6.0	6.0	6.0	6.0	0.0	0	1	1	1	1	1	0	1	0	1	1	0	1	0	1	1	11
0111011011101101	9.554855502553588	9.493688132685516	9.522016593148326	9.523520076129143	0.012497047184232299	7.076401580542994	6.680894432907149	6.628506581201032	6.795267531550391	0.09996948440968267	6.0	6.0	6.0	6.0	0.0	0	1	1	1	0	1	1	0	1	1	1	0	1	1	0	1	11
0111011001110001	9.487126996067325	9.497314341032036	9.468660076167357	9.484367137755573	0.0059298585868397926	6.0	6.0	6.0	6.0	0.0	6.0	6.0	6.0	6.0	0.0	0	1	1	1	0	1	1	0	0	1	1	1	0	0	0	1	9
0100010101111101	9.516220904805847	9.42481017847943	9.460011552252775	9.467014211846015	0.018822673175875406	6.0	6.0	6.0	6.0	0.0	6.0	6.0	6.0	6.0	0.0	0	1	0	0	0	1	0	1	0	1	1	1	1	1	0	1	9
0010010111001011	9.672490896246526	9.485458300413763	9.47770097828571	9.545216724982	0.045026066552153084	6.0	6.0	6.0	6.0	0.0	6.0	6.0	6.0	6.0	0.0	0	0	1	0	0	1	0	1	1	1	0	0	1	0	1	1	8
0001111101110001	9.661263967924382	9.518047536948307	9.365941491582674	9.515084332151789	0.060291550949185306	6.0	6.0	6.0	6.0	0.0	6.0	6.0	6.0	6.0	0.0	0	0	0	1	1	1	1	1	0	1	1	1	0	0	0	1	9
1111110010101001	9.505814921935213	9.495015565765124	9.492470930464867	9.497767139388401	0.0028923432006883187	6.512850830343085	6.458899205475488	6.0	6.323916678606191	0.11505013795871297	6.0	6.0	6.0	6.0	0.0	1	1	1	1	1	1	0	0	1	0	1	0	1	0	0	1	10
1111000111011101	9.555189897128038	9.523386362463002	9.51393157890138	9.530835946164139	0.008824062072096253	7.606259059280326	7.624912038601361	7.636992969177389	7.622721355686359	0.006321163172441206	6.0	6.0	6.0	6.0	0.0	1	1	1	1	0	0	0	1	1	1	0	1	1	1	0	1	11
1111000011110111	9.550247511021158	9.562857200298152	9.45978993023979	9.524298213853033	0.022951906445727626	7.701628557637937	7.777145380098287	7.585224871681506	7.687999603139244	0.0394708366778236	6.0	6.0	6.0	6.0	0.0	1	1	1	1	0	0	0	0	1	1	1	1	0	1	1	1	11
1101111101100001	9.558281154578662	9.511061993097373	9.59240802049334	9.553917056056457	0.016676220895884213	6.0	6.0	6.0	6.0	0.0	6.0	6.0	6.0	6.0	0.0	1	1	0	1	1	1	1	1	0	1	1	0	0	0	0	1	10
1101100101011011	9.483547909640533	9.552363954950744	9.398401557123561	9.478104473904947	0.031486315097804835	6.0	6.0	6.0	6.0	0.0	6.0	6.0	6.0	6.0	0.0	1	1	0	1	1	0	0	1	0	1	0	1	1	0	1	1	10
1101011001011111	9.497741680373721	9.59460460090824	9.431333063539794	9.507893114940586	0.033520360594937924	6.0	6.0	6.0	6.0	0.0	6.0	6.0	6.0	6.0	0.0	1	1	0	1	0	1	1	0	0	1	0	1	1	1	1	1	11
1101000011110011	9.489395245791194	9.505161131242339	9.534233368563989	9.509596581865841	0.0092859143341066	6.93648789904121	6.716125696999183	6.623974410282411	6.758862668774268	0.06555659988568059	6.0	6.0	6.0	6.0	0.0	1	1	0	1	0	0	0	0	1	1	1	1	0	0	1	1	9
1100001011111101	9.517742985382915	9.494523547241004	9.515485096863443	9.509250543162453	0.0052271378687640336	6.0	6.0	6.0	6.0	0.0	6.0	6.0	6.0	6.0	0.0	1	1	0	0	0	0	1	0	1	1	1	1	1	1	0	1	10
1011110111011101	9.531075428048633	9.58192667007617	9.521234356433297	9.5447454848527	0.013298133162221398	8.27395619793049	8.339718203995124	8.594561572546763	8.402745324824126	0.06913304206167178	8.06013533834096	8.25023855324483	7.858258145529581	8.056210679038458	0.08002469641839115	1	0	1	1	1	1	0	1	1	1	0	1	1	1	0	1	12
1001110101101001	9.566497094397066	9.521623705069214	9.54485401095525	9.544324936807177	0.009161652025634513	6.0	6.0	6.0	6.0	0.0	6.0	6.0	6.0	6.0	0.0	1	0	0	1	1	1	0	1	0	1	1	0	1	0	0	1	9
0101110101111111	9.621197316303537	9.513430562331614	9.420019680426869	9.518215853020672	0.041100049775852694	6.359526841470463	6.781317771341474	6.0	6.380281537603978	0.15965454008170152	6.0	6.0	6.0	6.0	0.0	0	1	0	1	1	1	0	1	0	1	1	1	1	1	1	1	12
1111101011000011	9.544799461561789	9.538462488131822	9.552782325176286	9.545348091623298	0.002929453289531969	7.429380055891793	7.246237279730835	7.2831068200472275	7.319574718556619	0.03954480545586676	6.0	6.0	6.0	6.0	0.0	1	1	1	1	1	0	1	0	1	1	0	0	0	0	1	1	10
1111100111010010	9.511248033525472	9.533972770842835	9.437165262592623	9.494128688986976	0.0206669114829901	7.4990123466790255	7.458791326484934	7.546061141267228	7.501288271477062	0.017832040537090907	6.0	6.0	6.0	6.0	0.0	1	1	1	1	1	0	0	1	1	1	0	1	0	0	1	0	10
1111010111001101	9.5784307371049	9.53195111756405	9.487727328123094	9.53270306093068	0.01851666440601621	7.310917158374987	7.3326548445209205	7.361512231986611	7.335028078294172	0.010361704712934445	6.0	6.0	6.0	6.0	0.0	1	1	1	1	0	1	0	1	1	1	0	0	1	1	0	1	11
1101111110101110	9.574194667840839	9.56706498514498	9.431533528399882	9.524264393795233	0.032817597265196986	6.0	6.0	6.0	6.0	0.0	6.0	6.0	6.0	6.0	0.0	1	1	0	1	1	1	1	1	1	0	1	0	1	1	1	0	12
1101111110101001	9.4678350856638	9.54686310982858	9.473964453908954	9.496220883133779	0.017948391906737138	6.0	6.0	6.0	6.0	0.0	6.0	6.0	6.0	6.0	0.0	1	1	0	1	1	1	1	1	1	0	1	0	1	0	0	1	11
1101100011100101	9.55763981694756	9.505636457048602	9.493965919644117	9.519080731213426	0.013839271899902505	7.20438975902334	7.083414485589807	7.136737330169691	7.141513858260946	0.024751651833882535	6.0	6.0	6.0	6.0	0.0	1	1	0	1	1	0	0	0	1	1	1	0	0	1	0	1	9
1101011111101111	9.602282688249133	9.635189374690523	9.562529018074828	9.600000360338163	0.014853667456220288	6.0	6.187787154241124	6.0	6.062595718080375	0.04426185672787431	6.0	6.0	6.0	6.0	0.0	1	1	0	1	0	1	1	1	1	1	1	0	1	1	1	1	13
1101010101011101	9.498141321056922	9.476425254004592	9.527467486185095	9.500678020415537	0.010457481366778307	6.0	6.0	6.0	6.0	0.0	6.0	6.0	6.0	6.0	0.0	1	1	0	1	0	1	0	1	0	1	0	1	1	1	0	1	10
1011110001011011	9.566205537926551	9.564727296715565	9.493276299152939	9.541403044598352	0.01701804933810551	6.0	6.0	6.0	6.0	0.0	6.0	6.0	6.0	6.0	0.0	1	0	1	1	1	1	0	0	0	1	0	1	1	0	1	1	10
1011101111001001	9.596907782399848	9.599647622845664	9.460051036348727	9.552202147198079	0.03258513747220353	6.847171321718927	6.607535507002387	6.227287279307626	6.560664702676313	0.12761381242683836	6.0	6.0	6.0	6.0	0.0	1	0	1	1	1	0	1	1	1	1	0	0	1	0	0	1	10
1001111101100011	9.6622320973281	9.668775692692652	9.555748680523342	9.628918823514697	0.02590401200942102	6.0	6.0	6.0	6.0	0.0	6.0	6.0	6.0	6.0	0.0	1	0	0	1	1	1	1	1	0	1	1	0	0	0	1	1	10
1001101011011101	9.501466131384491	9.548920294129355	9.385209896612368	9.478532107375406	0.03438689347394212	7.048858920526555	6.744801947265402	6.412531199950857	6.73539735591427	0.12993240341752516	6.0	6.0	6.0	6.0	0.0	1	0	0	1	1	0	1	0	1	1	0	1	1	1	0	1	10
1001011111000011	9.675030389342812	9.624136871025897	9.57462548949626	9.624597583288322	0.020495711625201835	6.0	6.0	6.0	6.0	0.0	6.0	6.0	6.0	6.0	0.0	1	0	0	1	0	1	1	1	1	1	0	0	0	0	1	1	9
1001000111100011	9.573598458511825	9.495480212261363	9.469294679647314	9.512791116806833	0.02215314173915663	6.500919227571784	6.468656323759023	6.0	6.323191850443602	0.1144551971191332	6.0	6.0	6.0	6.0	0.0	1	0	0	1	0	0	0	1	1	1	1	0	0	0	1	1	8
0101110001010011	9.555464527764652	9.529601716434476	9.414419506672333	9.499828583623819	0.030654673574497245	6.0	6.127692560054201	6.0	6.042564186684733	0.030097425040465312	6.0	6.0	6.0	6.0	0.0	0	1	0	1	1	1	0	0	0	1	0	1	0	0	1	1	8
0001111101011111	9.628320320387376	9.44640391889867	9.462250107231334	9.51232478217246	0.04113797735567182	6.0	6.0	6.0	6.0	0.0	6.0	6.0	6.0	6.0	0.0	0	0	0	1	1	1	1	1	0	1	0	1	1	1	1	1	11
0001110001011111	9.634165189537843	9.51977833456066	9.457793613166087	9.53724571242153	0.036527535743521106	6.0	6.0	6.0	6.0	0.0	6.0	6.0	6.0	6.0	0.0	0	0	0	1	1	1	0	0	0	1	0	1	1	1	1	1	9
1111111110010111	9.486028884321057	9.521036570983657	9.495479576006263	9.500848343770324	0.007393716722608002	6.251675099386648	6.184075495747978	6.0	6.145250198378208	0.053175247530701145	6.0	6.0	6.0	6.0	0.0	1	1	1	1	1	1	1	1	1	0	0	1	0	1	1	1	13
1111001101011100	9.516958014421188	9.521610974208985	9.48033647812697	9.506301822252382	0.00922913710628793	6.0	6.0	6.0	6.0	0.0	6.0	6.0	6.0	6.0	0.0	1	1	1	1	0	0	1	1	0	1	0	1	1	1	0	0	10
1101111101101101	9.530813514425352	9.61195144258634	9.595349902262765	9.579371619758152	0.017499142742871305	6.0	6.0	6.0	6.0	0.0	6.0	6.0	6.0	6.0	0.0	1	1	0	1	1	1	1	1	0	1	1	0	1	1	0	1	12
1101111010010010	9.399767283379877	9.485297196315596	9.477949861261825	9.454338113652433	0.019351905464213635	6.0	6.0	6.0	6.0	0.0	6.0	6.0	6.0	6.0	0.0	1	1	0	1	1	1	1	0	1	0	0	1	0	0	1	0	9
1101011111011100	9.607644280383633	9.502625941984906	9.491142175093456	9.533804132487333	0.026211463161865647	6.0	6.0	6.0	6.0	0.0	6.0	6.0	6.0	6.0	0.0	1	1	0	1	0	1	1	1	1	1	0	1	1	1	0	0	11
1101011101010001	9.49518302427204	9.417277687111335	9.375111042587108	9.429190584656828	0.024868849465357577	6.0	6.0	6.0	6.0	0.0	6.0	6.0	6.0	6.0	0.0	1	1	0	1	0	1	1	1	0	1	0	1	0	0	0	1	9
1101011001110011	9.476533535785117	9.497679541122187	9.472047317141726	9.482086798016343	0.005588407161298247	6.0	6.0	6.0	6.0	0.0	6.0	6.0	6.0	6.0	0.0	1	1	0	1	0	1	1	0	0	1	1	1	0	0	1	1	10
1101010101111001	9.555965725043878	9.521371266306367	9.524064215702232	9.533800402350826	0.007855880405546727	6.0	6.0	6.0	6.0	0.0	6.0	6.0	6.0	6.0	0.0	1	1	0	1	0	1	0	1	0	1	1	1	1	0	0	1	10
1101001111011111	9.507419256719292	9.618752099401474	9.40793017566767	9.51136717726281	0.04305647539215027	6.742125043128565	6.704004517032363	6.0	6.4820431867203085	0.1706055484761394	6.0	6.0	6.0	6.0	0.0	1	1	0	1	0	0	1	1	1	1	0	1	1	1	1	1	12
1101000011000011	9.530247589846473	9.49499696039619	9.536703515583264	9.520649355275308	0.009164731006740291	7.12648807349663	7.0048643073564945	6.5642169185694375	6.89852309980752	0.12077427446343877	6.0	6.0	6.0	6.0	0.0	1	1	0	1	0	0	0	0	1	1	0	0	0	0	1	1	7
1011110011000101	9.55391749170583	9.587533959349448	9.53178060173448	9.557744017596585	0.011460736935512328	7.873054317722574	7.7689067352587236	7.595090899924005	7.745683984301768	0.05733002053908584	6.0	6.0	6.0	6.0	0.0	1	0	1	1	1	1	0	0	1	1	0	0	0	1	0	1	9
1011011001111101	9.520454575515874	9.466592787995943	9.337771928027763	9.441606430513193	0.03832204754556694	6.0	6.0	6.0	6.0	0.0	6.0	6.0	6.0	6.0	0.0	1	0	1	1	0	1	1	0	0	1	1	1	1	1	0	1	11
1011001001011101	9.565509192567887	9.545221593265328	9.55113404186233	9.553954942565182	0.004259592741620851	6.0	6.0	6.0	6.0	0.0	6.0	6.0	6.0	6.0	0.0	1	0	1	1	0	0	1	0	0	1	0	1	1	1	0	1	9
1011000111101110	9.508598660062427	9.567078013580065	9.511662176883627	9.529112950175373	0.01343723566140107	6.633793277562714	6.956468737666343	6.0	6.530087338409686	0.19865141282112356	6.0	6.0	6.0	6.0	0.0	1	0	1	1	0	0	0	1	1	1	1	0	1	1	1	0	10
1001111110111001	9.54201380866114	9.44921176772485	9.459772484097156	9.483666020161051	0.020741385760971613	6.0	6.0	6.0	6.0	0.0	6.0	6.0	6.0	6.0	0.0	1	0	0	1	1	1	1	1	1	0	1	1	1	0	0	1	11
1001000111110011	9.586600810663253	9.507469278005432	9.49306334589722	9.529044478188636	0.020560606654162598	6.331578103950526	6.608570442564976	6.026559919574815	6.322236155363439	0.11884830402686511	6.0	6.0	6.0	6.0	0.0	1	0	0	1	0	0	0	1	1	1	1	1	0	0	1	1	9
1111111101101101	9.640597655979093	9.582560490800768	9.508790638838901	9.577316261872921	0.026968805728824465	6.0	6.0	6.0	6.0	0.0	6.0	6.0	6.0	6.0	0.0	1	1	1	1	1	1	1	1	0	1	1	0	1	1	0	1	13
1111101111101001	9.518323700571647	9.542914112194925	9.451769263846485	9.504335692204352	0.01925094858562248	7.429059133854732	7.202807579935384	7.315812722412628	7.315893145400914	0.046183413804133024	6.0	6.0	6.0	6.0	0.0	1	1	1	1	1	0	1	1	1	1	1	0	1	0	0	1	12
1111010111001110	9.550679479902787	9.572095092896953	9.526839776835622	9.549871449878454	0.009242119096315757	7.048985465898591	6.8376258847515885	6.658936436219312	6.848515928956497	0.07971146528315463	6.0	6.0	6.0	6.0	0.0	1	1	1	1	0	1	0	1	1	1	0	0	1	1	1	0	11
1101011110011001	9.381041030693591	9.323416667435923	9.358545794408414	9.354334497512644	0.011856384190041315	6.0	6.0	6.0	6.0	0.0	6.0	6.0	6.0	6.0	0.0	1	1	0	1	0	1	1	1	1	0	0	1	1	0	0	1	10
1101011011010100	9.547831756950515	9.57626396540016	9.548473281804645	9.557523001385107	0.006627225257662159	6.0	6.0	6.0	6.0	0.0	6.0	6.0	6.0	6.0	0.0	1	1	0	1	0	1	1	0	1	1	0	1	0	1	0	0	9
1001111111011011	9.615031679856168	9.587341711094922	9.548115426052664	9.583496272334584	0.013726718503332304	7.190617230191907	7.175774839664626	7.168457480500518	7.178283183452351	0.004609455282610522	6.0	6.0	6.0	6.0	0.0	1	0	0	1	1	1	1	1	1	1	0	1	1	0	1	1	12
1001110110011011	9.531372314243267	9.522561591411296	9.461137548508056	9.505023818054207	0.015620022941796515	6.0	6.0	6.0	6.0	0.0	6.0	6.0	6.0	6.0	0.0	1	0	0	1	1	1	0	1	1	0	0	1	1	0	1	1	10
1001000101111101	9.59011392869448	9.412118716930813	9.395437152220829	9.465889932615374	0.04405161660236331	6.0	6.0	6.0	6.0	0.0	6.0	6.0	6.0	6.0	0.0	1	0	0	1	0	0	0	1	0	1	1	1	1	1	0	1	9
0111010111101101	9.54239452087278	9.481308993795947	9.375144041032351	9.466282518567025	0.03455075245217144	7.598010744975538	7.656771914811844	7.710777526690492	7.655186728825957	0.02302524475275072	6.0	6.0	6.0	6.0	0.0	0	1	1	1	0	1	0	1	1	1	1	0	1	1	0	1	11
0110010111111011	9.525693614701256	9.496057400302156	9.511202379382434	9.51098446479528	0.006049957521239525	6.0	6.0	6.0	6.0	0.0	6.0	6.0	6.0	6.0	0.0	0	1	1	0	0	1	0	1	1	1	1	1	1	0	1	1	11
0101010001010010	9.591784606478724	9.475256240575073	9.534546861006046	9.53386256935328	0.02378748342561459	6.0	6.0	6.0	6.0	0.0	6.0	6.0	6.0	6.0	0.0	0	1	0	1	0	1	0	0	0	1	0	1	0	0	1	0	6
0011110110101101	9.560512496850551	9.402835433689427	9.235392652829637	9.399580194456538	0.0663747889901146	6.0	6.0	6.0	6.0	0.0	6.0	6.0	6.0	6.0	0.0	0	0	1	1	1	1	0	1	1	0	1	0	1	1	0	1	10
0011011111100001	9.642166985148501	9.433920651110043	9.364311852644787	9.480133162967777	0.059023393460862855	6.0	6.0	6.0	6.0	0.0	6.0	6.0	6.0	6.0	0.0	0	0	1	1	0	1	1	1	1	1	1	0	0	0	0	1	9
1111110101111001	9.547587817152321	9.544777996602155	9.5469136932941	9.546426502349526	0.0005988585174298451	6.80469682445131	6.549262936496383	6.263682055482441	6.539213938810044	0.11049131325318794	6.0	6.0	6.0	6.0	0.0	1	1	1	1	1	1	0	1	0	1	1	1	1	0	0	1	12
1111101111011110	9.556530138120065	9.51427869890112	9.521001310845776	9.530603382622319	0.009268637672454897	7.4403973984915694	7.462208699353206	7.461296390842646	7.4546341628958075	0.005036900042535062	6.0	6.0	6.0	6.0	0.0	1	1	1	1	1	0	1	1	1	1	0	1	1	1	1	0	13
1111100111101100	9.55068288995091	9.55098562331383	9.55389476481642	9.551854426027054	0.0007240106644935037	7.567625573980193	7.468674673930655	7.343853629208508	7.460051292373119	0.04577889406127505	6.0	6.0	6.0	6.0	0.0	1	1	1	1	1	0	0	1	1	1	1	0	1	1	0	0	11
1111001111110101	9.522726070221305	9.517276857098052	9.49955000126065	9.51318430952667	0.004947124625060635	7.699849876421986	7.235891081387389	7.4134958775622914	7.449745611790555	0.09556845129382714	6.0	6.0	6.0	6.0	0.0	1	1	1	1	0	0	1	1	1	1	1	1	0	1	0	1	12
1111001011010011	9.545222372255576	9.504530714972278	9.47558566515689	9.508446250794917	0.014281785074415722	7.290613854768223	7.3383190445511906	7.266387876886139	7.298440258735184	0.014941344594251426	6.0	6.0	6.0	6.0	0.0	1	1	1	1	0	0	1	0	1	1	0	1	0	0	1	1	10
1111000011100100	9.514573161262962	9.552301027902736	9.637092595667529	9.567988928277742	0.025616842165965048	7.039784992514432	7.123314021104777	7.078858510932685	7.080652508183964	0.017062085032389276	6.0	6.0	6.0	6.0	0.0	1	1	1	1	0	0	0	0	1	1	1	0	0	1	0	0	8
1111000001001110	9.502504208451432	9.55255455339863	9.460832609784838	9.5052971238783	0.018748684476113633	6.0	6.0	6.0	6.0	0.0	6.0	6.0	6.0	6.0	0.0	1	1	1	1	0	0	0	0	0	1	0	0	1	1	1	0	8
1110101111011011	9.560479145746235	9.629434291989352	9.458254771396676	9.549389403044088	0.03516116196052211	6.0	6.0	6.0	6.0	0.0	6.0	6.0	6.0	6.0	0.0	1	1	1	0	1	0	1	1	1	1	0	1	1	0	1	1	12
1011100010000111	9.353684904131468	9.294393718797789	9.35708371356784	9.335054112165698	0.014392351371597218	6.0	6.0	6.0	6.0	0.0	6.0	6.0	6.0	6.0	0.0	1	0	1	1	1	0	0	0	1	0	0	0	0	1	1	1	8
1001111101010111	9.617338485520797	9.504791397248338	9.469076880472631	9.530402254413923	0.03158932542920036	6.0	6.0	6.0	6.0	0.0	6.0	6.0	6.0	6.0	0.0	1	0	0	1	1	1	1	1	0	1	0	1	0	1	1	1	11
1001010011001001	9.541602764736252	9.585687643106358	9.573912595833932	9.56706766789218	0.009318520126809912	6.661705198060088	6.740398285446178	6.016839660811298	6.472981048105855	0.16206833661701708	6.0	6.0	6.0	6.0	0.0	1	0	0	1	0	1	0	0	1	1	0	0	1	0	0	1	7
0101011111001101	9.629550797389363	9.475217265786297	9.496711481879482	9.533826515018381	0.03412685650125836	6.0	6.0	6.0	6.0	0.0	6.0	6.0	6.0	6.0	0.0	0	1	0	1	0	1	1	1	1	1	0	0	1	1	0	1	10
0101000101011100	9.555299067245837	9.447955488114813	9.36911060385207	9.457455053070907	0.03815367451941194	6.0	6.0	6.0	6.0	0.0	6.0	6.0	6.0	6.0	0.0	0	1	0	1	0	0	0	1	0	1	0	1	1	1	0	0	7
1111101010101101	9.367381472267825	9.405896125422878	9.329102866347293	9.36746015467933	0.01567538305249066	6.0	6.0	6.0	6.0	0.0	6.0	6.0	6.0	6.0	0.0	1	1	1	1	1	0	1	0	1	0	1	0	1	1	0	1	11
1111011110111011	9.434003996819364	9.488131384506444	9.428857771557816	9.450331050961209	0.0134056568949391	6.0	6.0	6.0	6.0	0.0	6.0	6.0	6.0	6.0	0.0	1	1	1	1	0	1	1	1	1	0	1	1	1	0	1	1	13
1111011101001111	9.461314439669788	9.47991217712298	9.4963731712419	9.479199929344889	0.00716076273328483	6.0	6.0	6.0	6.0	0.0	6.0	6.0	6.0	6.0	0.0	1	1	1	1	0	1	1	1	0	1	0	0	1	1	1	1	12
1111000111100100	9.485013040479616	9.533778551673356	9.52605925966038	9.514950283937784	0.010701057398691973	7.422632310146557	7.015276814356907	7.089138323626227	7.175682482709898	0.08860214782115669	6.0	6.0	6.0	6.0	0.0	1	1	1	1	0	0	0	1	1	1	1	0	0	1	0	0	9
1110010111011101	9.536446685752123	9.454582754329556	9.463981297129543	9.485003579070407	0.018288785591588707	6.0	6.0	6.0	6.0	0.0	6.0	6.0	6.0	6.0	0.0	1	1	1	0	0	1	0	1	1	1	0	1	1	1	0	1	11
1101110001011001	9.526691314987485	9.531070362105488	9.46618162707999	9.507981101390987	0.014805354059270952	6.0	6.0	6.0	6.0	0.0	6.0	6.0	6.0	6.0	0.0	1	1	0	1	1	1	0	0	0	1	0	1	1	0	0	1	9
1101101010011101	9.404865545892577	9.359512003423216	9.3363026262318	9.366893391849198	0.014236585261360474	6.0	6.0	6.0	6.0	0.0	6.0	6.0	6.0	6.0	0.0	1	1	0	1	1	0	1	0	1	0	0	1	1	1	0	1	10
1101101001110111	9.448507742642306	9.449797314481918	9.354605950610235	9.417637002578154	0.022286396759081364	6.0	6.0	6.0	6.0	0.0	6.0	6.0	6.0	6.0	0.0	1	1	0	1	1	0	1	0	0	1	1	1	0	1	1	1	11
1101011111001101	9.573940465370756	9.514648329801444	9.494401113501088	9.527663302891096	0.016875372921089205	6.0	6.0	6.0	6.0	0.0	6.0	6.0	6.0	6.0	0.0	1	1	0	1	0	1	1	1	1	1	0	0	1	1	0	1	11
1101000011001011	9.514133947564984	9.493876293822296	9.510122267228363	9.506044169538548	0.00437923688872487	6.59945232723041	7.011876533352475	6.0	6.537109620194296	0.2077211630719568	6.0	6.0	6.0	6.0	0.0	1	1	0	1	0	0	0	0	1	1	0	0	1	0	1	1	8
1011111110101001	9.510151127791174	9.532573083385584	9.388410300942953	9.477044837373237	0.03166950901979153	6.0	6.0	6.0	6.0	0.0	6.0	6.0	6.0	6.0	0.0	1	0	1	1	1	1	1	1	1	0	1	0	1	0	0	1	11
1011111101110011	9.584411306962147	9.620528870829384	9.427669277403265	9.5442031517316	0.04185536107518553	6.0	6.0	6.0	6.0	0.0	6.0	6.0	6.0	6.0	0.0	1	0	1	1	1	1	1	1	0	1	1	1	0	0	1	1	12
1011101111010011	9.472374108757153	9.499200162803634	9.416786685952193	9.46278698583766	0.017160662312834578	7.335348048222968	7.234742073348669	7.142356901077932	7.23748234088319	0.03940606450516168	6.0	6.0	6.0	6.0	0.0	1	0	1	1	1	0	1	1	1	1	0	1	0	0	1	1	11
1011101111000101	9.481790377022994	9.504350369852855	9.4226196713615	9.469586806079116	0.017232102438993743	6.734490854659658	6.752558922327224	6.858754659388662	6.781934812125182	0.027409184797248562	6.0	6.0	6.0	6.0	0.0	1	0	1	1	1	0	1	1	1	1	0	0	0	1	0	1	10
1011101001111100	9.5471250832225	9.53486433538292	9.470074858064923	9.517354758890114	0.016902284120429916	6.0	6.0	6.0	6.0	0.0	6.0	6.0	6.0	6.0	0.0	1	0	1	1	1	0	1	0	0	1	1	1	1	1	0	0	10
1011100101011101	9.5006851921955	9.430080457026104	9.445897718423536	9.458887789215048	0.015126211309409464	6.0	6.0	6.0	6.0	0.0	6.0	6.0	6.0	6.0	0.0	1	0	1	1	1	0	0	1	0	1	0	1	1	1	0	1	10
1011011011100011	9.576890131377423	9.561830295263904	9.562890174573463	9.567203533738263	0.0034315561680025855	6.0	6.0	6.0	6.0	0.0	6.0	6.0	6.0	6.0	0.0	1	0	1	1	0	1	1	0	1	1	1	0	0	0	1	1	10
1011010111011101	9.52281079540252	9.51529656624222	9.511891337055062	9.516666232899935	0.002280922061923369	7.3331155882815535	7.283145416204183	7.315060750548023	7.310440585011253	0.01033008528160071	6.257813406915678	6.13575723792459	6.167716384588253	6.187095676476173	0.025839552410833095	1	0	1	1	0	1	0	1	1	1	0	1	1	1	0	1	11
1011010111010111	9.556932263163034	9.519313987016313	9.53492033894175	9.537055529707033	0.007715816599317924	6.939908500523582	6.8875165663047895	7.293838358535793	7.040421141788055	0.09023251723641927	6.0	6.0	6.165376056697049	6.055125352232349	0.03897951037879144	1	0	1	1	0	1	0	1	1	1	0	1	0	1	1	1	11
1011010101100101	9.426849544095504	9.444292956797565	9.372520780383502	9.41455442709219	0.015281736121902334	6.0	6.0	6.0	6.0	0.0	6.0	6.0	6.0	6.0	0.0	1	0	1	1	0	1	0	1	0	1	1	0	0	1	0	1	9
1001110101110001	9.624116309469967	9.507098149833938	9.548327377632424	9.559847278978777	0.024230984009538444	6.0	6.0	6.0	6.0	0.0	6.0	6.0	6.0	6.0	0.0	1	0	0	1	1	1	0	1	0	1	1	1	0	0	0	1	9
1001110011110111	9.564418387150301	9.514833571775409	9.541488040176613	9.540246666367441	0.010130969315594587	7.455565442765303	7.501880836706527	7.360582711602932	7.43934299702492	0.029407101888255734	6.0	6.0	6.0	6.0	0.0	1	0	0	1	1	1	0	0	1	1	1	1	0	1	1	1	11
1001101101011111	9.463390989532632	9.459237668483187	9.34000657127235	9.420878409762722	0.02860507884550324	6.0	6.0	6.0	6.0	0.0	6.0	6.0	6.0	6.0	0.0	1	0	0	1	1	0	1	1	0	1	0	1	1	1	1	1	11
1000010111011011	9.565076063066835	9.552593673239748	9.484503217951874	9.534057651419486	0.0177044435155454	6.0	6.0	6.0	6.0	0.0	6.0	6.0	6.0	6.0	0.0	1	0	0	0	0	1	0	1	1	1	0	1	1	0	1	1	9
0111110011101101	9.543748828786187	9.469646849008782	9.419395902801462	9.477597193532143	0.025538593454387002	9.002831259760988	8.761598521692719	8.701067829571079	8.821832537008262	0.06517463003445685	6.0	6.0	6.0	6.0	0.0	0	1	1	1	1	1	0	0	1	1	1	0	1	1	0	1	11
0111000111101101	9.470470285154347	9.466434869082276	9.433378184187262	9.456761112807962	0.008308049900339926	7.275373039361892	7.108075160053747	7.179460152087832	7.187636117167823	0.03427165959650576	6.0	6.0	6.0	6.0	0.0	0	1	1	1	0	0	0	1	1	1	1	0	1	1	0	1	10
0101000111110111	9.56738364184606	9.422566274727435	9.396650817024396	9.46220024453263	0.03756231054258517	6.559898307592177	6.410870007304837	6.6030439079494725	6.524604074282163	0.04116423245357127	6.0	6.0	6.0	6.0	0.0	0	1	0	1	0	0	0	1	1	1	1	1	0	1	1	1	10
0001011011011011	9.637006272525834	9.462760240842274	9.400974135796707	9.50024688305494	0.04996953847181071	6.0	6.0	6.0	6.0	0.0	6.0	6.0	6.0	6.0	0.0	0	0	0	1	0	1	1	0	1	1	0	1	1	0	1	1	9
0001010011111011	9.631512508515444	9.457923671408759	9.496170011173852	9.528535397032686	0.03723553352949336	6.498315518500077	6.4796674211580445	6.0	6.3259943132193746	0.11531923594392796	6.0	6.0	6.0	6.0	0.0	0	0	0	1	0	1	0	0	1	1	1	1	1	0	1	1	9
1111111001101111	9.576643207830037	9.58554313614198	9.568024456677863	9.57673693354996	0.003576139000946806	6.0	6.0	6.0	6.0	0.0	6.0	6.0	6.0	6.0	0.0	1	1	1	1	1	1	1	0	0	1	1	0	1	1	1	1	13
1111110001011001	9.566215239113834	9.648207552080242	9.5067633035341	9.573728698242725	0.028994131339395865	7.012506685964158	6.816486267850225	6.0	6.609664317938127	0.21923120843248722	6.0	6.0	6.0	6.0	0.0	1	1	1	1	1	1	0	0	0	1	0	1	1	0	0	1	10
1111110001000101	9.588938532913907	9.530356870852188	9.487516212073642	9.535603871946579	0.02078569242098941	6.0	6.0	6.0	6.0	0.0	6.0	6.0	6.0	6.0	0.0	1	1	1	1	1	1	0	0	0	1	0	0	0	1	0	1	9
1111011010001111	9.330395270366797	9.436966118184294	9.449334758637564	9.405565382396219	0.026696301627605033	6.0	6.0	6.0	6.0	0.0	6.0	6.0	6.0	6.0	0.0	1	1	1	1	0	1	1	0	1	0	0	0	1	1	1	1	11
1111010111100101	9.625394858970363	9.463187818172516	9.537639821525069	9.54207416622265	0.03314746994058357	7.418271549805518	7.393132453017915	7.436256949570922	7.415886984131451	0.008843030832507016	6.0	6.0	6.0	6.0	0.0	1	1	1	1	0	1	0	1	1	1	1	0	0	1	0	1	11
1111010011010101	9.556664644654155	9.47596871288921	9.509302909404138	9.513978755649168	0.016554737511427185	8.056903718953397	7.855683063655784	7.83392718519635	7.915504655935177	0.05018897758922153	6.0	6.0	6.0	6.0	0.0	1	1	1	1	0	1	0	0	1	1	0	1	0	1	0	1	10
1111001111011010	9.45222639803499	9.559145516292887	9.532005255890418	9.514459056739431	0.022689301042363986	6.967054038608588	6.954852831248268	6.108477570837471	6.676794813564776	0.2009459229291706	6.0	6.0	6.0	6.0	0.0	1	1	1	1	0	0	1	1	1	1	0	1	1	0	1	0	11
1111000110110011	9.38043876613681	9.354740007087292	9.255744045112966	9.330307606112356	0.026879050162576017	6.0	6.0	6.0	6.0	0.0	6.0	6.0	6.0	6.0	0.0	1	1	1	1	0	0	0	1	1	0	1	1	0	0	1	1	10
1101111110101010	9.607579120570524	9.57208493859419	9.46915109258965	9.549605050584788	0.029352991773567788	6.0	6.0	6.0	6.0	0.0	6.0	6.0	6.0	6.0	0.0	1	1	0	1	1	1	1	1	1	0	1	0	1	0	1	0	11
1101111101111110	9.569105141145725	9.674129990434356	9.545786331124546	9.596340487568208	0.027911606881733653	6.0	6.0	6.0	6.0	0.0	6.0	6.0	6.0	6.0	0.0	1	1	0	1	1	1	1	1	0	1	1	1	1	1	1	0	13
1101100111110100	9.602335547432054	9.50411020766421	9.488815948997056	9.53175390136444	0.025148907061258392	7.164222812836359	7.115269973274349	7.182179633690463	7.153890806600391	0.014137942029016642	6.0	6.0	6.0	6.0	0.0	1	1	0	1	1	0	0	1	1	1	1	1	0	1	0	0	10
1101100111100110	9.528906618320683	9.597358972309598	9.558509734491064	9.56159177504045	0.014015202591691733	7.024894857834762	6.943213210827725	6.840216851214511	6.936108306625666	0.03778084011792592	6.0	6.0	6.0	6.0	0.0	1	1	0	1	1	0	0	1	1	1	1	0	0	1	1	0	10
1011010111101001	9.600849600549406	9.531966542422515	9.518382220543225	9.550399454505047	0.01805106819162775	6.969879542334144	6.850047509661995	7.047380098554507	6.955769050183548	0.040588108174899974	6.0	6.0	6.0	6.0	0.0	1	0	1	1	0	1	0	1	1	1	1	0	1	0	0	1	10
1011010001010010	9.522235384733415	9.525755202987051	9.506711471440694	9.518234019720387	0.00413670801640729	6.0	6.0	6.0	6.0	0.0	6.0	6.0	6.0	6.0	0.0	1	0	1	1	0	1	0	0	0	1	0	1	0	0	1	0	7
1011000101101111	9.483669690872267	9.49501105782926	9.428625626962994	9.469102125221507	0.014496648087097243	6.0	6.0	6.0	6.0	0.0	6.0	6.0	6.0	6.0	0.0	1	0	1	1	0	0	0	1	0	1	1	0	1	1	1	1	10
1001010011111011	9.58228042668562	9.488436650088508	9.461352854600305	9.51068997712481	0.0259077766502348	6.385869271453013	6.7581183534624625	6.0	6.381329208305158	0.15475858543453988	6.0	6.0	6.0	6.0	0.0	1	0	0	1	0	1	0	0	1	1	1	1	1	0	1	1	10
0111100101011011	9.503162152290047	9.4248616089551	9.315670629872148	9.414564797039098	0.03844430169385855	6.0	6.0	6.0	6.0	0.0	6.0	6.0	6.0	6.0	0.0	0	1	1	1	1	0	0	1	0	1	0	1	1	0	1	1	10
0111011001000111	9.53436630381355	9.428202107689787	9.405061030986248	9.455876480829863	0.02814950145135159	6.0	6.0	6.0	6.0	0.0	6.0	6.0	6.0	6.0	0.0	0	1	1	1	0	1	1	0	0	1	0	0	0	1	1	1	9
0101000111011100	9.558402771523824	9.384597732525718	9.403887279918843	9.448962594656129	0.03889277116697965	6.084176785380534	6.195164784233468	6.0	6.093113856538	0.03996295509985718	6.0	6.0	6.0	6.0	0.0	0	1	0	1	0	0	0	1	1	1	0	1	1	1	0	0	8
0100010111011110	9.630945213898457	9.58767217069811	9.38294551230924	9.5338542989686	0.054080550239442915	6.0	6.0	6.0	6.0	0.0	6.0	6.0	6.0	6.0	0.0	0	1	0	0	0	1	0	1	1	1	0	1	1	1	1	0	9
0010010011111101	9.549890337596393	9.443255925007172	9.423676224420197	9.472274162341256	0.027730981965713195	6.0	6.0	6.0	6.0	0.0	6.0	6.0	6.0	6.0	0.0	0	0	1	0	0	1	0	0	1	1	1	1	1	1	0	1	9
1111110101011001	9.564586172895552	9.601747753743211	9.486136745270684	9.550823557303149	0.024095412810210954	6.368403852136398	6.979674379290923	6.057863761559508	6.468647330995609	0.1914724828058161	6.0	6.0	6.0	6.0	0.0	1	1	1	1	1	1	0	1	0	1	0	1	1	0	0	1	11
1111110101010010	9.602875307639351	9.562415621513999	9.518380855037792	9.561223928063713	0.017252503345258196	6.403577854712608	6.0	6.0	6.134525951570869	0.0951242126013347	6.0	6.0	6.0	6.0	0.0	1	1	1	1	1	1	0	1	0	1	0	1	0	0	1	0	10
1111101111110111	9.478039420676092	9.527659150278929	9.509606753916334	9.505101774957117	0.01025305253759327	7.996431370050107	7.458934274621946	8.02846417990421	7.827943274858754	0.13062813436023527	6.0	6.0	6.0	6.0	0.0	1	1	1	1	1	0	1	1	1	1	1	1	0	1	1	1	14
1111101101111010	9.549813538217613	9.593883183174539	9.46310465395949	9.535600458450547	0.027163899613462238	6.0	6.0	6.0	6.0	0.0	6.0	6.0	6.0	6.0	0.0	1	1	1	1	1	0	1	1	0	1	1	1	1	0	1	0	12
1111011011011101	9.578563356054593	9.511234132539744	9.528936687509779	9.539578058701371	0.01424918225961322	6.7707312835546585	6.612776846859737	6.339846501508606	6.574451543974334	0.08899161522362842	6.0	6.0	6.0	6.0	0.0	1	1	1	1	0	1	1	0	1	1	0	1	1	1	0	1	12
1111010111010000	9.592801587885596	9.555560321240145	9.514279612522836	9.554213840549524	0.016035299141815847	7.233583158946562	7.177749377252763	7.471865361568017	7.2943992992557805	0.06377042842495725	6.0	6.0	6.0	6.0	0.0	1	1	1	1	0	1	0	1	1	1	0	1	0	0	0	0	9
1111001111100001	9.555030800628087	9.62380239580142	9.553687930210113	9.577507042213208	0.016370174343060182	7.253050938403293	7.1826904216502365	6.9147842816289495	7.116841880560827	0.07286758029012359	6.0	6.0	6.0	6.0	0.0	1	1	1	1	0	0	1	1	1	1	1	0	0	0	0	1	10
1111001110011001	9.391596643796152	9.409145579730794	9.406612355591284	9.402451526372744	0.0038724596608385744	6.0	6.0	6.0	6.0	0.0	6.0	6.0	6.0	6.0	0.0	1	1	1	1	0	0	1	1	1	0	0	1	1	0	0	1	10
1110101111001011	9.543551102556467	9.51900087886723	9.477337817145935	9.51329659952321	0.01366536920674601	6.0	6.0	6.0	6.0	0.0	6.0	6.0	6.0	6.0	0.0	1	1	1	0	1	0	1	1	1	1	0	0	1	0	1	1	11
1101111110011110	9.579166153672563	9.475287329552051	9.434137372189287	9.496196951804633	0.03051296470816476	6.0	6.0	6.0	6.0	0.0	6.0	6.0	6.0	6.0	0.0	1	1	0	1	1	1	1	1	1	0	0	1	1	1	1	0	12
1101101001011101	9.493911215384603	9.403608269644222	9.515095248594015	9.470871577874279	0.02417110979141986	6.0	6.0	6.0	6.0	0.0	6.0	6.0	6.0	6.0	0.0	1	1	0	1	1	0	1	0	0	1	0	1	1	1	0	1	10
1101011111110011	9.552742939384325	9.55151243709569	9.540341601385414	9.54819899262181	0.0027893392811418442	6.0	6.0	6.0	6.0	0.0	6.0	6.0	6.0	6.0	0.0	1	1	0	1	0	1	1	1	1	1	1	1	0	0	1	1	12
1101011110011101	9.340649097434758	9.423714238885296	9.337417384126264	9.367260240148772	0.01997040090039346	6.0	6.0	6.0	6.0	0.0	6.0	6.0	6.0	6.0	0.0	1	1	0	1	0	1	1	1	1	0	0	1	1	1	0	1	11
1101011010101111	9.421435252374344	9.342824541184253	9.349769604358244	9.371343132638946	0.01776688783623303	6.0	6.0	6.0	6.0	0.0	6.0	6.0	6.0	6.0	0.0	1	1	0	1	0	1	1	0	1	0	1	0	1	1	1	1	11
1101011001111001	9.523053906517848	9.479207500890963	9.557629366324234	9.519963591244348	0.0160450396326285	6.0	6.0	6.0	6.0	0.0	6.0	6.0	6.0	6.0	0.0	1	1	0	1	0	1	1	0	0	1	1	1	1	0	0	1	10
1101000011010010	9.476262680137724	9.526787623524477	9.50105343139047	9.501367911684223	0.010313960195208055	6.211582336395921	6.361788476916259	6.2968258203354965	6.2900655445492255	0.030753718363350623	6.0	6.0	6.0	6.0	0.0	1	1	0	1	0	0	0	0	1	1	0	1	0	0	1	0	7
1100101111010101	9.606225054219124	9.583486616692662	9.398513888983626	9.529408519965136	0.046510415410826234	6.0	6.0	6.0	6.0	0.0	6.0	6.0	6.0	6.0	0.0	1	1	0	0	1	0	1	1	1	1	0	1	0	1	0	1	10
1100010111111111	9.55740021518206	9.530084300256382	9.507859319003996	9.531781278147479	0.010130275572128467	6.0	6.0	6.0	6.0	0.0	6.0	6.0	6.0	6.0	0.0	1	1	0	0	0	1	0	1	1	1	1	1	1	1	1	1	12
1011011111110001	9.670218166104268	9.481407221622064	9.60261581899584	9.584747068907392	0.039055222359624185	6.404293263053242	6.268120398525807	6.0	6.224137887193017	0.08397827756322249	6.0	6.0	6.0	6.0	0.0	1	0	1	1	0	1	1	1	1	1	1	1	0	0	0	1	11
1011011011000011	9.596869911570149	9.537171764734293	9.556073762628838	9.56337181297776	0.012456011521085027	6.0	6.0	6.0	6.0	0.0	6.0	6.0	6.0	6.0	0.0	1	0	1	1	0	1	1	0	1	1	0	0	0	0	1	1	9
1011000010001010	9.48722832611938	9.366939757637725	9.326646855332374	9.393604979696493	0.034107373935392364	6.0	6.0	6.0	6.0	0.0	6.0	6.0	6.0	6.0	0.0	1	0	1	1	0	0	0	0	1	0	0	0	1	0	1	0	6
1001110001111011	9.63850018738142	9.62765148754642	9.432664310729589	9.566271995219143	0.047289328584827324	6.0	6.0	6.0	6.0	0.0	6.0	6.0	6.0	6.0	0.0	1	0	0	1	1	1	0	0	0	1	1	1	1	0	1	1	10
1001101001010101	9.53292668267176	9.43771124906108	9.326464093492236	9.43236734174169	0.0421863291279631	6.0	6.0	6.0	6.0	0.0	6.0	6.0	6.0	6.0	0.0	1	0	0	1	1	0	1	0	0	1	0	1	0	1	0	1	8
1001011101010010	9.624052453048888	9.559294821232527	9.43144092258326	9.538262732288226	0.040013668479447276	6.0	6.0	6.0	6.0	0.0	6.0	6.0	6.0	6.0	0.0	1	0	0	1	0	1	1	1	0	1	0	1	0	0	1	0	8
1001000011001101	9.60337944628082	9.522673439661064	9.50595117703723	9.54400135432637	0.02126901843029099	6.702184065651902	6.503234829118282	6.275227483823478	6.493548792864554	0.08721940262482139	6.0	6.0	6.0	6.0	0.0	1	0	0	1	0	0	0	0	1	1	0	0	1	1	0	1	7
0111111101011101	9.590223311776617	9.440856536571633	9.459819331798093	9.496966393382115	0.03319773215655286	6.0	6.0	6.0	6.0	0.0	6.0	6.0	6.0	6.0	0.0	0	1	1	1	1	1	1	1	0	1	0	1	1	1	0	1	12
0101010011000111	9.489467499046734	9.555195904042069	9.467900063538039	9.504187822208948	0.01856366018967461	6.849841228334374	6.8570423506121605	6.971582279071749	6.892821952672762	0.027884750316768903	6.0	6.0	6.0	6.0	0.0	0	1	0	1	0	1	0	0	1	1	0	0	0	1	1	1	8
0001011111111111	9.5847565221181	9.413994525643846	9.272050428394877	9.423600492052275	0.06392115091513036	6.0	6.0	6.0	6.0	0.0	6.0	6.0	6.0	6.0	0.0	0	0	0	1	0	1	1	1	1	1	1	1	1	1	1	1	12
0001011011011111	9.582442224350562	9.492388143754397	9.428646305013848	9.501158891039601	0.0315462377765082	6.0	6.0	6.0	6.0	0.0	6.0	6.0	6.0	6.0	0.0	0	0	0	1	0	1	1	0	1	1	0	1	1	1	1	1	10
1111111011111111	9.624686188503032	9.558259452839206	9.54941179842237	9.577452479921535	0.016797011971088044	8.65083299465177	8.228191865309018	8.400511034659454	8.426511964873413	0.08675964627638691	7.220662197092795	7.15413588033309	7.303700260749143	7.22616611272501	0.03059165405731429	1	1	1	1	1	1	1	0	1	1	1	1	1	1	1	1	15
1111101101111111	9.471191085077916	9.552341597127564	9.408194656787096	9.477242446330857	0.029501551744893606	6.0	6.0	6.0	6.0	0.0	6.0	6.0	6.0	6.0	0.0	1	1	1	1	1	0	1	1	0	1	1	1	1	1	1	1	14
1111010010110111	9.451572930240195	9.424510325083904	9.387872010801676	9.421318422041924	0.013051774899097177	6.0	6.0	6.0	6.0	0.0	6.0	6.0	6.0	6.0	0.0	1	1	1	1	0	1	0	0	1	0	1	1	0	1	1	1	11
1111000111110000	9.495637022224344	9.50660157482578	9.548019268161434	9.516752621737185	0.011278724347206738	7.517881481295708	7.306229963444261	7.354505821163218	7.39287242196773	0.04528260941975936	6.0	6.0	6.0	6.0	0.0	1	1	1	1	0	0	0	1	1	1	1	1	0	0	0	0	9
1111000101011101	9.443245396183917	9.459828022937256	9.422281679722897	9.441785032948022	0.007681487136596377	6.0	6.0	6.0	6.0	0.0	6.0	6.0	6.0	6.0	0.0	1	1	1	1	0	0	0	1	0	1	0	1	1	1	0	1	10
1111000010011111	9.383465824575003	9.420601987649396	9.440288370334985	9.414785394186461	0.011779749546687417	6.0	6.0	6.0	6.0	0.0	6.0	6.0	6.0	6.0	0.0	1	1	1	1	0	0	0	0	1	0	0	1	1	1	1	1	10
1110101011110011	9.615412416820906	9.545071645886793	9.483394692978393	9.547959585228698	0.026967341351380802	6.0	6.0	6.0	6.0	0.0	6.0	6.0	6.0	6.0	0.0	1	1	1	0	1	0	1	0	1	1	1	1	0	0	1	1	11
1101100101011101	9.521254548014069	9.533734034276774	9.364182125418196	9.47305690256968	0.03857724333330932	6.0	6.0	6.0	6.0	0.0	6.0	6.0	6.0	6.0	0.0	1	1	0	1	1	0	0	1	0	1	0	1	1	1	0	1	10
1101100001001101	9.425582203290187	9.398970485353221	9.465123419627234	9.429892036090214	0.013589111280351326	6.0	6.0	6.0	6.0	0.0	6.0	6.0	6.0	6.0	0.0	1	1	0	1	1	0	0	0	0	1	0	0	1	1	0	1	8
1101011111001011	9.605777942859774	9.564557893682183	9.607577257721507	9.592637698087822	0.0099345017077447	6.0	6.0	6.0	6.0	0.0	6.0	6.0	6.0	6.0	0.0	1	1	0	1	0	1	1	1	1	1	0	0	1	0	1	1	11
1101010110011101	9.374745981203473	9.421467707265279	9.36476892843477	9.386994205634508	0.012357198519503194	6.0	6.0	6.0	6.0	0.0	6.0	6.0	6.0	6.0	0.0	1	1	0	1	0	1	0	1	1	0	0	1	1	1	0	1	10
1101001111111011	9.489638133717444	9.653052597354657	9.476821488266005	9.539837406446035	0.04011301989278493	6.76955108774186	6.640718227708679	6.0	6.470089771816846	0.16826951181125738	6.0	6.0	6.0	6.0	0.0	1	1	0	1	0	0	1	1	1	1	1	1	1	0	1	1	12
1101000110110011	9.397868764314852	9.361527291784435	9.362218829581971	9.37387162856042	0.008485442921496512	6.0	6.0	6.0	6.0	0.0	6.0	6.0	6.0	6.0	0.0	1	1	0	1	0	0	0	1	1	0	1	1	0	0	1	1	9
1101000001111111	9.438204511612376	9.529557685644734	9.473356866110004	9.48037302112237	0.018811656071058506	6.0	6.0	6.0	6.0	0.0	6.0	6.0	6.0	6.0	0.0	1	1	0	1	0	0	0	0	0	1	1	1	1	1	1	1	10
1100110111011011	9.670258711482447	9.672010214401027	9.570854090984051	9.637707672289174	0.023639014152487575	6.0	6.0	6.0	6.0	0.0	6.0	6.0	6.0	6.0	0.0	1	1	0	0	1	1	0	1	1	1	0	1	1	0	1	1	11
1011110111111111	9.572300184621747	9.578734841079498	9.486058782776514	9.545697936159254	0.021126494673315475	8.12255368484738	8.133684895228278	8.470079672701745	8.242106084259134	0.08063285489559714	7.5434309964373565	7.7710931503641785	7.91242624166128	7.742316796154271	0.07600485913268576	1	0	1	1	1	1	0	1	1	1	1	1	1	1	1	1	14
1001110101110111	9.583789709416461	9.549757997714492	9.373293006367057	9.50228023783267	0.0461299229734422	6.0	6.0	6.0	6.0	0.0	6.0	6.0	6.0	6.0	0.0	1	0	0	1	1	1	0	1	0	1	1	1	0	1	1	1	11
0111110000111111	9.421615437296603	9.462366125254508	9.338074226708862	9.407351929753325	0.02586730480290446	6.0	6.0	6.0	6.0	0.0	6.0	6.0	6.0	6.0	0.0	0	1	1	1	1	1	0	0	0	0	1	1	1	1	1	1	11
0100010111010011	9.627021855064584	9.578009976948193	9.451548102925	9.552193311645928	0.03696312256376371	6.0	6.0	6.0	6.0	0.0	6.0	6.0	6.0	6.0	0.0	0	1	0	0	0	1	0	1	1	1	0	1	0	0	1	1	8
[truncated: 63,700 more rows]
