# Supplementary material for: Binding affinity landscapes constrain the evolution of broadly neutralizing anti-influenza antibodies
Source: eLife. 2021 Sep 7;10:e71393. doi: 10.7554/eLife.71393 (PMC8476123; doi:10.7554/eLife.71393)
Supplement: Figure 1—source data 2. — Biological triplicates, mean, and standard error reported. [file elife-71393-fig1-data2.csv]

genotype	h1_repa	h1_repb	h1_repc	h1_mean	h1_sem	h9_repa	h9_repb	h9_repc	h9_mean	h9_sem	pos1	pos2	pos3	pos4	pos5	pos6	pos7	pos8	pos9	pos10	pos11	som_mut
01010100111	9.430291961637987	9.471052750721498	9.432668529451416	9.444671080603634	0.009339935825072242	9.624191746083076	9.635040262494693	9.680782727178137	9.646671578585302	0.01226173193874027	0	1	0	1	0	1	0	0	1	1	1	6
01011110011	9.40449285011314	9.442880298443523	9.440280295307788	9.429217814621483	0.008757690967854085	9.36500350414108	9.401992558346311	9.445685076512843	9.404227046333412	0.016487994281286236	0	1	0	1	1	1	1	0	0	1	1	7
01010100101	9.064914365725732	9.184359146808156	9.047793578385512	9.0990223636398	0.030372836715639662	9.217001397477297	9.20867554222011	9.341691334240489	9.255789424645966	0.030418425119298313	0	1	0	1	0	1	0	0	1	0	1	5
01000100110	9.320260144075231	9.346941572418684	9.301643807504236	9.322948507999383	0.009295091464519163	9.652131406453304	9.586889333199396	9.681691678437204	9.640237472696635	0.019803073880937206	0	1	0	0	0	1	0	0	1	1	0	4
01001100010	8.449592829550175	8.846445807660569	8.540014293849659	8.6120176436868	0.08491312555547537	9.1711535467906	9.16909259065319	9.326549169344352	9.222265102262716	0.036872385490060486	0	1	0	0	1	1	0	0	0	1	0	4
01010100110	9.347730105661563	9.42567105514344	9.389709490005048	9.387703550270016	0.015925429074279934	9.566810198862811	9.536074989135354	9.587261302079304	9.563382163359156	0.010518422162724134	0	1	0	1	0	1	0	0	1	1	0	5
01010100011	8.888772230757644	9.171277955429089	9.074736379151458	9.04492885511273	0.05862129517081669	9.169182196771347	9.245132809614793	9.290478434966687	9.234931147117608	0.025020823955141182	0	1	0	1	0	1	0	0	0	1	1	5
01011100010	8.75450346398541	8.893760371662065	8.827312963999058	8.825192266548845	0.028435583934490208	9.051206263193222	9.118608513288953	9.36036331500167	9.176726030494615	0.0663673552098918	0	1	0	1	1	1	0	0	0	1	0	5
01000100111	9.354603332732164	9.410527810700284	9.328301247614057	9.364477463682169	0.017143637137223257	9.705685843449986	9.710012010126825	9.76023260959513	9.725310154390646	0.012378491680200769	0	1	0	0	0	1	0	0	1	1	1	5
01010011100	8.896201782239874	9.150844952746278	9.015774727003624	9.020940487329925	0.05201089610392534	7.2503888840456785			7.2503888840456785	0.0	0	1	0	1	0	0	1	1	1	0	0	5
01000100101	8.73684618725499	8.861639622973632	8.6917722925272	8.763419367585273	0.03592429058195104	9.267672549919508	9.21808398757732	9.350672547613305	9.278809695036712	0.02734946240826095	0	1	0	0	0	1	0	0	1	0	1	4
01100100111	9.362808933141418	9.397123283167183	9.347983970637324	9.36930539564864	0.010290133039369929	9.68147494875188	9.756501359941026	9.725194863579867	9.72105705742426	0.015384416757532904	0	1	1	0	0	1	0	0	1	1	1	6
01001011000	8.413047020054334	8.875443981967619	8.582532276699087	8.623674426240347	0.09550065003994782	7.494451976592642	8.440009679788258		7.96723082819045	0.27295899723715644	0	1	0	0	1	0	1	1	0	0	0	4
01011111100	9.405572880338227	9.422083225361892	9.42126967848752	9.416308594729212	0.003799279257149001	9.598291325633289	9.594918843443534	9.628688671412414	9.60729961349641	0.007593442982058229	0	1	0	1	1	1	1	1	1	0	0	7
00010100100	7.0	7.0	7.0	7.0	0.0			7.0	7.0	0.0	0	0	0	1	0	1	0	0	1	0	0	3
01000100100	8.684234747961089	8.846205900755391	8.794234598354489	8.774891749023656	0.03376209153660191	9.155357676605565	9.225492812103138	9.38545767781724	9.255436055508648	0.04814725850387598	0	1	0	0	0	1	0	0	1	0	0	3
01010011101	9.274546440335556	9.475336484646801	9.25872086245027	9.336201262477543	0.049297683794335335	7.815139394795357	8.831529631384061	8.610881251471772	8.41918342588373	0.21825952461446682	0	1	0	1	0	0	1	1	1	0	1	6
01001100011	8.700039171036128	8.875480265565377	8.730566591449902	8.7686953426838	0.03826496584213328	9.255014614123153	9.261106943858913	9.397554613205306	9.304558723729125	0.03290252197781108	0	1	0	0	1	1	0	0	0	1	1	5
01011111101	9.42727893480721	9.45433538074878	9.474289716262124	9.45196801060604	0.009632468741146342	9.711096063192233	9.697063792126905	9.76516615965008	9.72444200498974	0.014680308451642811	0	1	0	1	1	1	1	1	1	0	1	8
01011100011	9.06390178345977	9.192706079343804	9.051357021719292	9.102654961507623	0.03194068886086828	9.24982309157648	9.241060225646153	9.382694031346489	9.29119244952304	0.03240010689790252	0	1	0	1	1	1	0	0	0	1	1	6
01000100010	8.288596639194907	8.722656324354682	8.4992706061638	8.503507856571128	0.08861472628605217	9.123588570911737	9.16026101392643	9.350046622430275	9.211298735756147	0.049622657898667134	0	1	0	0	0	1	0	0	0	1	0	3
01110100100	9.030031029344789	9.17926160069527	9.106468223692804	9.105253617910956	0.030464589572162082	9.141224917641656	9.177268925206599	9.34938812396827	9.222627322272174	0.045416623710033924	0	1	1	1	0	1	0	0	1	0	0	5
01000111100	9.276289034589091	9.344679868060242	9.358203646177863	9.326390849609064	0.01792747911664031	9.693529947683508	9.61870517655392	9.70794339829236	9.673392840843263	0.01955757465655916	0	1	0	0	0	1	1	1	1	0	0	5
01010111100	9.374431911513794	9.415465478352592	9.411792034719749	9.400563141528712	0.009269164234172105	9.504484289511096	9.537985736101096	9.634726481497584	9.559065502369924	0.027610458624775562	0	1	0	1	0	1	1	1	1	0	0	6
01001100111	9.321568020309474	9.400655298747164	9.358039559876053	9.360087626310898	0.01615985424213006	9.79685817902629	9.770445851926233	9.802967774741226	9.790090601897916	0.007056544728565262	0	1	0	0	1	1	0	0	1	1	1	6
01001111111	9.36955977350084	9.41712144476194	9.389702349749623	9.392127856004134	0.009746285221647614	9.843034097299256	9.846836230169584	9.872762867367637	9.854211064945492	0.006604809906722331	0	1	0	0	1	1	1	1	1	1	1	8
01010111111	9.435479998584283	9.48828991615574	9.501382778872417	9.475050897870814	0.014243406757092805	9.693039295010939	9.668120063663382	9.663411659632144	9.674857006102156	0.006499858839521122	0	1	0	1	0	1	1	1	1	1	1	8
01010111101	9.440983365366813	9.507304106817044	9.501519760126136	9.483269077436665	0.014996809386226755	9.714882497501499	9.679726052191004	9.727949676863258	9.70751940885192	0.010182016826892754	0	1	0	1	0	1	1	1	1	0	1	7
00000100100	7.0	7.0	7.0	7.0	0.0	7.180182065400968			7.180182065400968	0.0	0	0	0	0	0	1	0	0	1	0	0	2
01010100100	9.054658861111509	9.117051202229913	9.042544831965447	9.071418298435622	0.01632206511169309	9.154942114629128	9.240238560266114	9.404863973181788	9.266681549359012	0.051864659772220746	0	1	0	1	0	1	0	0	1	0	0	4
01100100100	8.694137910029848	8.844734330317213	8.813259243958164	8.784043828101742	0.032429348445479365	9.223654586149914	9.193843264561107	9.374756782866523	9.264084877859181	0.03959878289834889	0	1	1	0	0	1	0	0	1	0	0	4
10000100110	9.027445392361653	9.014129345853457	8.899590940237681	8.980388559484263	0.02869529790339891	9.188723557937623	9.232118996951092	9.279001781777302	9.23328144555534	0.018432547707700486	1	0	0	0	0	1	0	0	1	1	0	4
01010010111	9.441012102889774	9.617314296787846	9.455629712059592	9.504652037245735	0.039943725348525284	9.125494746334274	9.26751760051711	9.317817830418845	9.236943392423411	0.0407188097778898	0	1	0	1	0	0	1	0	1	1	1	6
01000011111	9.147858220069356	9.416537851465485	9.307610366737276	9.290668812757373	0.05517011309007562	8.535376028539995	9.252042009067797	9.07154592127986	8.952987986295884	0.15217562215645092	0	1	0	0	0	0	1	1	1	1	1	6
01010110011	9.434173523000279	9.50830866100496	9.421649592917717	9.454710592307652	0.019121440549983243	9.346142410337213	9.38303187608349	9.464069412894776	9.397747899771826	0.02462761152970936	0	1	0	1	0	1	1	0	0	1	1	6
01110100101	9.074213160570071	9.228281099114255	9.1401499446516	9.147548068111975	0.03155757065762202	9.185455145821429	9.175145343921232	9.312873980736432	9.224491490159698	0.0313187150763865	0	1	1	1	0	1	0	0	1	0	1	6
01010000111	9.400821688297857	9.463048756939463	9.415188009914726	9.426352818384014	0.013301263906415872	9.057877397502931	9.259618801226381	9.265101703891112	9.194199300873475	0.04821006388596603	0	1	0	1	0	0	0	0	1	1	1	5
01010111000	9.387382174440248	9.46291716812998	9.399918286047305	9.416739209539179	0.016525694227810646	9.152588713144388	9.274850526635195	9.43323984850881	9.286893029429464	0.05744567194387138	0	1	0	1	0	1	1	1	0	0	0	5
01011110010	9.38677944113981	9.408353514660048	9.363250889233855	9.386127948344571	0.009209415808748353	9.219807222247276	9.300171930172557	9.43622580501208	9.318734985810638	0.044661114737260525	0	1	0	1	1	1	1	0	0	1	0	6
01011000000	7.447770677779295	8.08329520700062		7.765532942389958	0.1834601290112713	7.0		7.0	7.0	0.0	0	1	0	1	1	0	0	0	0	0	0	3
11000100110	9.348796103014665	9.372532099791801	9.358441211084765	9.359923137963746	0.00487333674544506	10.053919945402	9.984014688290587	10.018966595893913	10.018967076528833	0.014269350856097485	1	1	0	0	0	1	0	0	1	1	0	5
01000111101	9.375165643868565	9.415738814078717	9.40312142854238	9.398008628829887	0.008476940052288374	9.783389172951141	9.80199471550916	9.793778942626524	9.793054277028942	0.003806472746975494	0	1	0	0	0	1	1	1	1	0	1	6
01011011100	8.977405432713443	9.146942881186586	9.087553179139226	9.070633831013085	0.03511987771537195	7.621171165881702	8.41401838712119		8.017594776501447	0.22887527830443288	0	1	0	1	1	0	1	1	1	0	0	6
00100100111	7.761758604657412	8.369972871373283	8.067759687456658	8.066497054495784	0.12415201987931089	8.689321024989908	9.085722565602746	9.106746559132153	8.960596716574935	0.09600640404827368	0	0	1	0	0	1	0	0	1	1	1	5
01010011111	9.47600955000848	9.597562767134633	9.446300469694627	9.506624262279248	0.032718537335567524	8.232071817025714	9.160196408442925	9.036746594436432	8.809671606635023	0.20576122969034533	0	1	0	1	0	0	1	1	1	1	1	7
01000111111	9.455761162992443	9.436960939173236	9.499636260153164	9.46411945410628	0.013130401985100456	9.866040102368938	9.800228312576259	9.828379287821766	9.831549234255654	0.013480444720806025	0	1	0	0	0	1	1	1	1	1	1	7
01000000111	9.074813387846888	9.243192522138694	9.122928933471604	9.146978281152395	0.035406359031295936	9.02957384501703	9.210011622831935	9.254206758114174	9.16459740865438	0.04858296091678466	0	1	0	0	0	0	0	0	1	1	1	4
01001110011	9.332332802318195	9.416087104544166	9.355400238625398	9.36794004849592	0.017661780341703282	9.479724014883141	9.521370310635426	9.573516104467645	9.524870143328735	0.019185175000582175	0	1	0	0	1	1	1	0	0	1	1	6
01011111010	9.345185049186076	9.401815407275556	9.370058748627217	9.37235306836295	0.011588049099704786	9.095482554926877	9.236023679031808	9.381712080070713	9.237739438009799	0.05842950615580774	0	1	0	1	1	1	1	1	0	1	0	7
01001111100	9.326598582523204	9.359316591635043	9.383573445713386	9.356496206623879	0.011672615299590565	9.755824937676216	9.703856871948863	9.87563530117858	9.778439036934554	0.0359641147560236	0	1	0	0	1	1	1	1	1	0	0	6
00001100011	7.0	7.0	7.0	7.0	0.0	7.839086266291982	8.35473366710767	8.137936142556791	8.110585358652147	0.1056993452574664	0	0	0	0	1	1	0	0	0	1	1	4
01100010111	9.28241786009237	9.448688339029507	9.25508424912585	9.32873014941591	0.042777051896326815	9.186517185402966	9.303762149380647	9.29732341088761	9.262534248557076	0.026908207410494735	0	1	1	0	0	0	1	0	1	1	1	6
01111100111	9.377284017286565	9.409724387591336	9.422412549809936	9.403140318229278	0.00950139102931361	9.696796715218595	9.701875728780367	9.807084894497704	9.735252446165555	0.025417758128695817	0	1	1	1	1	1	0	0	1	1	1	8
00001111110	8.825884362104073	8.982623714765692	8.830882741814836	8.879796939561533	0.03636906933118244	9.218325890919662	9.289351759288511	9.33044497869008	9.279374209632751	0.023156482474199897	0	0	0	0	1	1	1	1	1	1	0	6
01011100111	9.39282084512484	9.471601645780684	9.433153264075287	9.432525251660271	0.016082596378741296	9.797888852639591	9.744029913274977	9.792905708589236	9.778274824834602	0.012150057660710466	0	1	0	1	1	1	0	0	1	1	1	7
01001110010	9.309077164285783	9.429661010391806	9.330046403029893	9.356261525902495	0.02630126893595757	9.355768275938507	9.422866791606712	9.45152818999832	9.41005441918118	0.02006492773707241	0	1	0	0	1	1	1	0	0	1	0	5
01010100001	8.423635178178227	8.865139048038143	8.42690549293896	8.571893239718444	0.10368019885885006	8.929407852036062	9.171931759277458	9.292378226583898	9.13123927929914	0.07547492038743546	0	1	0	1	0	1	0	0	0	0	1	4
11001100010	9.34265475198418	9.353600627608538	9.3491623776972	9.348472585763306	0.002247587891497215	9.708500005229514	9.709731970683675	9.769668596051735	9.729300190654975	0.014274601865014003	1	1	0	0	1	1	0	0	0	1	0	5
00100100110	7.538667807318425	7.895646109178791	7.398045471639523	7.6107864627122455	0.10472378268706925	8.272611621870258	9.046579425481095	9.026558070693033	8.781916372681463	0.18011279362343777	0	0	1	0	0	1	0	0	1	1	0	4
00000100110	7.556883330853591	7.9610259872505535		7.758954659052073	0.11666593573089845	8.385874405525746	9.05304519670391	9.217912021903468	8.885610541377707	0.17985986286552522	0	0	0	0	0	1	0	0	1	1	0	3
01101100010	8.34793343025393	8.810582934770483	8.579238518886045	8.579251627970152	0.09443793476514901	9.191291574233796	9.232082559625953	9.378546063555463	9.267306732471738	0.040200782967669206	0	1	1	0	1	1	0	0	0	1	0	5
01011011101	9.186622048225011	9.428532556113213	9.207085848081745	9.274080150806656	0.054766703547684495	8.560930882086438	9.254793192721447	9.168116027054248	8.994613367287378	0.15434733894670383	0	1	0	1	1	0	1	1	1	0	1	7
01001100100	8.726120511889164	8.84033155551983	8.818493672044275	8.79498191315109	0.02475090141957776	9.278535407045519	9.270966082457752	9.404024000324966	9.317841829942745	0.03050914763782965	0	1	0	0	1	1	0	0	1	0	0	4
01101100111	9.3205125750382	9.373096779675127	9.354186895819062	9.349265416844128	0.010873824540305433	9.732882500217508	9.77246842979427	9.81588716026554	9.77374603009244	0.01694927527611785	0	1	1	0	1	1	0	0	1	1	1	7
10000100100	8.776554472286815	8.84027744697921	8.691169530100977	8.769333816455669	0.030543401147425746	9.010791554352641	9.15184171040301	9.157910542184682	9.106847935646778	0.03398364550361438	1	0	0	0	0	1	0	0	1	0	0	3
01001011001	8.772680990668434	9.11135016731732	8.751486497720709	8.878505885235487	0.08243648707386889	8.253709171798201	8.968838106746242	8.782524239919232	8.668357172821224	0.15145292877508199	0	1	0	0	1	0	1	1	0	0	1	5
01011011111	9.449460340045377	9.52855806723945	9.484891937342434	9.48763678154242	0.016174894327726144	8.770100425714821	9.18773548692993	9.27700303682753	9.078279649824093	0.11047096111318502	0	1	0	1	1	0	1	1	1	1	1	8
01001111110	9.324063530176039	9.334200562121003	9.353551169035699	9.33727175377758	0.006116294834606467	9.737223490993925	9.688505526294117	9.687913367304754	9.70454746153093	0.011553353331154273	0	1	0	0	1	1	1	1	1	1	0	7
01110111110	9.404846829095144	9.411189866834803	9.437457716979326	9.417831470969757	0.007058690639473646	9.524004550752732	9.513782587363933	9.528552851969637	9.522113330028766	0.00308822268197258	0	1	1	1	0	1	1	1	1	1	0	8
00010011101	8.863962502297568	9.050539346932453	8.776975723099174	8.897159190776398	0.05706104795986691	7.0	7.0	7.0	7.0	0.0	0	0	0	1	0	0	1	1	1	0	1	5
01000101101	8.546912279020576	8.76447085906169	8.512218512424138	8.607867216835468	0.05581881392662487	9.051049368436292	9.171063312472	9.215949304612332	9.14602066184021	0.03480504752837586	0	1	0	0	0	1	0	1	1	0	1	5
00000100111	7.834733012108789	8.383502418713642	7.893299495674722	8.037178308832384	0.12302628449719163	8.495612690526665	9.12856243951524	9.209425445352368	8.944533525131424	0.15957346439541537	0	0	0	0	0	1	0	0	1	1	1	4
01010000100	8.241041437571312	8.868228596687594	8.629986566691404	8.57975220031677	0.12925011399987485	7.916773811272821	8.89322489340912		8.40499935234097	0.28187714756094645	0	1	0	1	0	0	0	0	1	0	0	3
01001011110	9.15927172705686	9.396554223141498	9.233175530034616	9.263000493410992	0.04956963463543101	8.496935512778622	9.204519158441807	9.272455633987226	8.991303435069218	0.17533471472197787	0	1	0	0	1	0	1	1	1	1	0	6
01011000001	8.23888227619204	8.819926756966758	8.339721216009124	8.46617674972264	0.12675200436598508	7.540694975570843	8.258369329947632		7.899532152759237	0.207174740844965	0	1	0	1	1	0	0	0	0	0	1	4
01010011110	9.215639216906276	9.439214497470212	9.322789112995103	9.325880942457196	0.0456502027685854	8.083575792817058	8.835324209560762	8.547343312635066	8.48874777167096	0.15484212313666637	0	1	0	1	0	0	1	1	1	1	0	6
00000111110	8.72656028615333	8.959027595866203	8.697055316949344	8.794214399656292	0.058580682304588856	9.051939880814842	9.111439269842588	9.330572650524266	9.164650600393898	0.059906370506074946	0	0	0	0	0	1	1	1	1	1	0	5
00000111100	8.65104190312827	8.91413729468459	8.70810801123433	8.75776240301573	0.0565006861786192	9.375730464146237	9.378508999430887	9.468588613451908	9.407609359009676	0.02156688112527239	0	0	0	0	0	1	1	1	1	0	0	4
01011011110	9.308070461723213	9.355764684537329	9.31092342492901	9.324919523729852	0.010920949353519243	8.437895290599256	9.189252717954254	9.141140686533332	8.922762898362281	0.17170766808990634	0	1	0	1	1	0	1	1	1	1	0	7
00011011100	8.582011037741054	8.911264597013863	8.56148238275371	8.684919339169541	0.08013477005474014	7.0		7.0	7.0	0.0	0	0	0	1	1	0	1	1	1	0	0	5
00001111111	8.93668280149517	9.149511230325762	8.926468314654471	9.004220782158468	0.05141022868691385	9.256115839347132	9.304475380485858	9.374954917359707	9.311848712397564	0.024397595965347015	0	0	0	0	1	1	1	1	1	1	1	7
00010100101	7.0	7.0	7.0	7.0	0.0			7.0	7.0	0.0	0	0	0	1	0	1	0	0	1	0	1	4
11010100100	9.35379067013971	9.420408966368377	9.415824859869463	9.39667483212585	0.015190688046949726	9.934442515459258	9.827519179264877	9.813904764743304	9.858622153155814	0.026950212044807572	1	1	0	1	0	1	0	0	1	0	0	5
01111100110	9.348639495912817	9.423590183764624	9.38151258932412	9.384580756333854	0.015337653226425402	9.720241042583616	9.661948034403649	9.7758588912868	9.719349322758022	0.02325409355414292	0	1	1	1	1	1	0	0	1	1	0	7
01000011100	8.75278978015656	9.055474299560824	8.810083191211504	8.872782423642962	0.0656415453839617	7.665842494097247	8.614549711207053		8.14019610265215	0.27386818359024345	0	1	0	0	0	0	1	1	1	0	0	4
01010101110	9.047658254383716	9.157559144525306	9.068295099242494	9.091170832717172	0.02384682298889398	9.057934529283573	9.132041733288881	9.268882816636172	9.152953026402875	0.04368973300258534	0	1	0	1	0	1	0	1	1	1	0	6
10010100111	9.278065711813914	9.277996499681858	9.260561073452367	9.272207761649378	0.004117750337434204	9.23380382086933	9.321151622833037	9.31458640224792	9.289847281983429	0.01985962269097982	1	0	0	1	0	1	0	0	1	1	1	6
01101011011	8.89361819540552	9.166146777666313	9.014041867623906	9.024602280231912	0.05575481858564343	8.011364066020755	8.92161483141016	8.475285121978851	8.469421339803255	0.18581572499345125	0	1	1	0	1	0	1	1	0	1	1	7
01111111100	9.36879843892658	9.370955331783717	9.43259077582569	9.390781515511996	0.014788361035416442	9.62155736242254	9.656979755117574	9.717868205388386	9.665468440976165	0.019887131345430506	0	1	1	1	1	1	1	1	1	0	0	8
01011100000	8.233049671706626	8.670593565411332	8.11147362717595	8.33837228809797	0.12005097283773734	8.509182166874682	9.073487076709856	9.347097565794853	8.976588936459798	0.1744359916630487	0	1	0	1	1	1	0	0	0	0	0	4
01010101100	8.777504968051524	8.986255531619527	8.70043717786975	8.821399225846934	0.06037116065862294	8.829593031373117	9.147816629302028	9.252159940673893	9.076523200449678	0.08986356599232935	0	1	0	1	0	1	0	1	1	0	0	5
01100010110	9.223668831887268	9.483826238318002	9.270805173183515	9.326100081129594	0.056588594498310996	9.277951534903977	9.354726556462252	9.426582615040012	9.353086902135415	0.03034473003486967	0	1	1	0	0	0	1	0	1	1	0	5
00100111111	9.030608957882727	9.194340797463028	9.029310606517187	9.084753453954313	0.0387458832695804	9.290815070818583	9.319310180644779	9.374592199052069	9.328239150171811	0.017389875772862134	0	0	1	0	0	1	1	1	1	1	1	7
01001011101	8.890235550949903	9.131472114649394	8.888703571978187	8.970137079192495	0.0570414059978973	8.543112280402031	9.201401086103242	9.170614409845737	8.97170925878367	0.15166216967718602	0	1	0	0	1	0	1	1	1	0	1	6
10010111111	9.383954027016363	9.408078482773771	9.406493655836783	9.39950872187564	0.0055089218278010135	10.041337870009432	9.98514762582232	9.979960096455038	10.002148530762263	0.013895927750042253	1	0	0	1	0	1	1	1	1	1	1	8
00000111111	8.9361719158884	9.192274262842336	8.895933782551676	9.008126653760803	0.06562206601878097	9.262279199758172	9.342512408993	9.411549544552749	9.33878038443464	0.03049823755632197	0	0	0	0	0	1	1	1	1	1	1	6
01000000101	8.01890082955744	8.628390877488169	8.221959249327806	8.289750318791139	0.1266992840389448	8.03684719833361	9.052991149822322	8.670734365527055	8.586857571227663	0.2095286853882741	0	1	0	0	0	0	0	0	1	0	1	3
00101100010	7.0	7.0	7.0	7.0	0.0	7.406093514210638			7.406093514210638	0.0	0	0	1	0	1	1	0	0	0	1	0	4
00011011101	8.846083392368305	9.029489089599668	8.813957541840008	8.896510007935992	0.047470332293140835			7.0	7.0	0.0	0	0	0	1	1	0	1	1	1	0	1	6
01100111011	9.33927511378918	9.405580022143738	9.287396457691166	9.34408386454136	0.024183954010618493	9.446825210687685	9.438413913302657	9.49866314153042	9.461300755173587	0.013320713298173187	0	1	1	0	0	1	1	1	0	1	1	7
00110111100	9.058800102533604	9.179042313388706	9.011373492464344	9.083071969462218	0.03528467802671037	9.383342641610062	9.368368424776275	9.47990210026935	9.410537722218562	0.024713759660108803	0	0	1	1	0	1	1	1	1	0	0	6
01000111110	9.34099394652635	9.385196466550932	9.334831187678406	9.353673866918562	0.011215692985288283	9.629527529918384	9.60299804270216	9.63390278210748	9.622142784909341	0.006827353972124831	0	1	0	0	0	1	1	1	1	1	0	6
01000100011	8.52537720839555	8.929444532899787	8.719961213715072	8.724927651670136	0.08249858565704232	9.239103776218519	9.307640263441307	9.385869205250641	9.310871081636824	0.029980136283337868	0	1	0	0	0	1	0	0	0	1	1	4
01011011010	8.93343430736405	9.124318681426717	9.110323971902302	9.056025653564356	0.04343662355676099	7.543998553155358	8.34986461119013		7.946931582172744	0.232633492768579	0	1	0	1	1	0	1	1	0	1	0	6
01011111011	9.377774563484104	9.438844321760829	9.44216621360765	9.41959503295086	0.014801309014044613	9.30570859498458	9.40358563063571	9.447315421247813	9.385536548956035	0.029601380382216675	0	1	0	1	1	1	1	1	0	1	1	8
01001111011	9.315894121111764	9.421753382253767	9.35562085654769	9.36442278663774	0.021831366090884357	9.43568828548808	9.432686538761851	9.487502404498038	9.451959076249324	0.0125813933919566	0	1	0	0	1	1	1	1	0	1	1	7
01000101100	8.482842919773471	8.749840684538459	8.390536485607171	8.541073363306367	0.0761773864716884	8.94361230298635	9.165371207442933	9.243033752554656	9.117339087661312	0.06343449970039061	0	1	0	0	0	1	0	1	1	0	0	4
10001111100	9.26652171657156	9.243135991235896	9.305362020837604	9.271673242881688	0.012831753306356334	9.929880920900047	9.949601500324652	9.849004447561713	9.909495622928803	0.02176239890338252	1	0	0	0	1	1	1	1	1	0	0	6
01010101101	8.973675581859311	9.076877129956523	8.857895639135226	8.969482783650353	0.044723983122770754	8.981525176417787	9.20901789194734	9.288471617235636	9.15967156186692	0.06503886607507685	0	1	0	1	0	1	0	1	1	0	1	6
01100000111	9.059175652869929	9.287550637502108	9.16224833876768	9.169658209713239	0.04669040415690246	9.05442272128426	9.223987977185784	9.222314448343983	9.166908382271343	0.03977115395290023	0	1	1	0	0	0	0	0	1	1	1	5
01110111111	9.42627128483356	9.486464855289919	9.492927375443662	9.468554505189047	0.015007465277917565	9.684999200315076	9.630909559706637	9.70422049156547	9.673376417195728	0.015518483592596735	0	1	1	1	0	1	1	1	1	1	1	9
00010111111	9.21160078824198	9.330785174049344	9.201730991014829	9.248038984435384	0.029324483928531757	9.039784727198278	9.307148949871893	9.329603027896534	9.2255122349889	0.06582435816571669	0	0	0	1	0	1	1	1	1	1	1	7
10000111100	9.238507756368056	9.2301847477683	9.211465181212887	9.226719228449747	0.0056543874685385095	9.921083062478251	9.84855611840482	9.827225885739976	9.865621688874349	0.020086138163369478	1	0	0	0	0	1	1	1	1	0	0	5
00101100011	7.0	7.0	7.0	7.0	0.0	8.171754661913527	9.009119047279274	8.64751267458734	8.609462127926713	0.17145488305752543	0	0	1	0	1	1	0	0	0	1	1	5
01001100000	7.9481301952903785	8.60175434266976	7.9032902500268545	8.151058262662332	0.15960778624143854	8.561613406583334	9.10674961420176	9.330899650298088	8.999754223694394	0.16152210446486728	0	1	0	0	1	1	0	0	0	0	0	3
01110111101	9.387558637682767	9.465279256023882	9.488571521550034	9.447136471752229	0.02159386927903882	9.640758494895316	9.752812483734582	9.75227865502729	9.715283211219061	0.026348691462206635	0	1	1	1	0	1	1	1	1	0	1	8
01011100001	8.483422756862499	8.836621749353872	8.352872815205732	8.5576391071407	0.10217167563210142	8.902245924984122	9.165613662925487	9.315559495304552	9.127806361071388	0.08541962197281379	0	1	0	1	1	1	0	0	0	0	1	5
00100011100	8.503109902842038	8.904225946752033	8.587665778097628	8.6650005425639	0.08632209017857834	7.0	7.0	7.0	7.0	0.0	0	0	1	0	0	0	1	1	1	0	0	4
01010100010	8.690683215580016	8.949384757798859	8.852226262730428	8.830764745369768	0.05334958533448399	9.0044268100931	9.127737844160132	9.306234690948859	9.146133115067363	0.06194861947678056	0	1	0	1	0	1	0	0	0	1	0	4
01001011011	8.830444427552639	9.151538939941684	9.075667210846227	9.01921685944685	0.06851447912841072	8.045290557441787	9.037704658031428	8.672521403056514	8.585172206176576	0.20491618140472478	0	1	0	0	1	0	1	1	0	1	1	6
00111111100	9.030394090498724	9.142228796052047	9.000916175294785	9.057846353948518	0.03043444943018001	9.355792321376525	9.387005238084827	9.404461590768824	9.382419716743392	0.010065988114061881	0	0	1	1	1	1	1	1	1	0	0	7
01110000100	8.143159781214457	8.820813140246596	8.416284268431957	8.460085729964335	0.13918958580306007	7.647990880870945	8.798061048581664		8.223025964726304	0.33199666045737075	0	1	1	1	0	0	0	0	1	0	0	4
01111011011	9.110998527657733	9.396019188158302	9.241455753897583	9.249491156571205	0.05824891987573765	7.685241904041536			7.685241904041536	0.0	0	1	1	1	1	0	1	1	0	1	1	8
01011111111	9.398663718807333	9.47556969280021	9.512339479231617	9.462190963613052	0.023681171926966497	9.700751021303525	9.740074993221222	9.764645069954259	9.735157028159668	0.013157710974339994	0	1	0	1	1	1	1	1	1	1	1	9
01011000011	8.507800595974084	8.961661224470815	8.664745779413499	8.711402533286133	0.09410101579004562	8.875608981382818	9.111123935756623	9.265357626965333	9.084030181368258	0.08013172002864402	0	1	0	1	1	0	0	0	0	1	1	5
01000011110	9.007340543563991	9.299198605715082	9.181946422103325	9.162828523794133	0.05995748860299265	8.393785258661149	9.207115574678355	8.799756263582106	8.800219032307202	0.16602043616893056	0	1	0	0	0	0	1	1	1	1	0	5
11000100100	9.313669733960793	9.38127153057066	9.29879264186718	9.331244635466211	0.017945982106653945	9.908370098952995	9.904524572678843	9.868278848551922	9.89372450672792	0.009030579144298142	1	1	0	0	0	1	0	0	1	0	0	4
00011100010	7.0	7.0	7.0	7.0	0.0		7.0	7.0	7.0	0.0	0	0	0	1	1	1	0	0	0	1	0	4
01010010100	9.073623006678744	9.327686920278472	9.201006570162779	9.200772165706665	0.051860645415525625	7.934220768822608	8.779815649538838		8.357018209180723	0.24410221600344242	0	1	0	1	0	0	1	0	1	0	0	4
11000100111	9.366704519344944	9.40174919529619	9.398170508904524	9.388874741181885	0.007872322839087268	10.086385433024033	9.981207399788099	10.044232524393491	10.037275119068541	0.02160983104008652	1	1	0	0	0	1	0	0	1	1	1	6
10010000111	9.384229545332957	9.388662052788245	9.36929496300513	9.380728853708776	0.004142506750195898	8.365709855139638	9.09447118145146	9.066086494873922	8.842089177155007	0.1685251546213468	1	0	0	1	0	0	0	0	1	1	1	5
10000111101	9.273073856685302	9.297564312116867	9.33960510514585	9.30341442464934	0.013737234182516057	10.00895358824105	9.983877878672542	9.946110026433509	9.979647164449034	0.012914801084384598	1	0	0	0	0	1	1	1	1	0	1	6
11110100110	9.424044986066793	9.4275780214344	9.44213136205379	9.431251456518327	0.0039136479800952985	10.054577724713683	10.009245814898431	9.976131982480245	10.01331850736412	0.016077280743224762	1	1	1	1	0	1	0	0	1	1	0	7
01110100110	9.410591970655952	9.380698087761212	9.439458800069712	9.410249619495625	0.01199509087771812	9.640851673585457	9.576269065115532	9.663442476747298	9.62685440514943	0.018469540540364295	0	1	1	1	0	1	0	0	1	1	0	6
00010100111	8.099700495019395	8.581219728601019	8.27414127219338	8.31835383193793	0.09952491807468183	8.293688141248397	9.225635905117374	9.23578032172318	8.918368122696316	0.22086743260509528	0	0	0	1	0	1	0	0	1	1	1	5
01001011111	9.224424524059943	9.416222469420726	9.293121081969662	9.31125602515011	0.039672135654371256	8.62297495446082	9.148039416017856	9.308918783212741	9.026644384563804	0.146448113278508	0	1	0	0	1	0	1	1	1	1	1	7
01110100111	9.399150490990195	9.415298941987286	9.413165976674016	9.409205136550499	0.0035814175095067995	9.557585136629283	9.632115904678418	9.671253907159953	9.620318316155883	0.02357447302238426	0	1	1	1	0	1	0	0	1	1	1	7
01001000011	8.409427166692279	8.802681136976657	8.33499378927474	8.515700697647892	0.10259419357874963	8.606227417565073	9.118741091743926	9.04728488908452	8.924084466131173	0.11332205192649662	0	1	0	0	1	0	0	0	0	1	1	4
00100111110	8.92490101520509	8.966956330797839	8.83867937735321	8.91017890778538	0.026696752397426308	9.136688743412588	9.22269698156458	9.317146893583061	9.225510872853409	0.03684929777457611	0	0	1	0	0	1	1	1	1	1	0	6
01100111111	9.331858275916797	9.421999317672773	9.413464007778696	9.38910720045609	0.020315398098593822	9.736227592573163	9.806527855498695	9.79407053636314	9.778941994811666	0.015314406719141535	0	1	1	0	0	1	1	1	1	1	1	8
00010100011	7.0	7.0	7.0	7.0	0.0	7.322911979577936			7.322911979577936	0.0	0	0	0	1	0	1	0	0	0	1	1	4
01011010111	9.490663424782674	9.577470573019754	9.473270268692273	9.513801422164901	0.02278870717274182	9.225655484746577	9.291119556506061	9.305276276934627	9.274017106062422	0.017340886153567978	0	1	0	1	1	0	1	0	1	1	1	7
01111100101	9.090714101366263	9.228389718168398	9.128610570923644	9.149238130152769	0.029033790702315883	9.247119079605689	9.236377510815833	9.291414987084266	9.258303859168597	0.011910117679958131	0	1	1	1	1	1	0	0	1	0	1	7
00001011000	8.628207476532634	8.88190075061403	8.550830062662302	8.686979429936322	0.07070190589766252	7.0	7.0	7.0	7.0	0.0	0	0	0	0	1	0	1	1	0	0	0	3
00001100001	7.0	7.0	7.0	7.0	0.0	7.610874750272242	8.230914102839929		7.920894426556085	0.17898994355655778	0	0	0	0	1	1	0	0	0	0	1	3
01011011000	8.56721933528122	8.943434540013572	8.750379654598305	8.7536778432977	0.076803459779355						0	1	0	1	1	0	1	1	0	0	0	5
10011110010	9.222714553490468	9.246645810272256	9.233604771739314	9.234321711834014	0.004891519278532113	8.992992350009763	9.21870215120992	9.178258367075216	9.129984289431633	0.04913250539562655	1	0	0	1	1	1	1	0	0	1	0	6
01011100101	9.224431824559817	9.322279916371484	9.295480652929916	9.280730797953739	0.020642718385909427	9.243447224058322	9.252823118612481	9.305449140194517	9.267239827621774	0.013643927374073123	0	1	0	1	1	1	0	0	1	0	1	6
01111110000	9.413331276325014	9.416315065957116	9.469547051149	9.433064464477043	0.012912914064673039	9.34411647428094	9.318186860548217	9.465952516956824	9.37608528392866	0.032210701886655035	0	1	1	1	1	1	1	0	0	0	0	6
01010001111	8.510407609438483	8.754698802664599	8.609756687779518	8.624954366627533	0.05015438474307025	8.370688704568193	9.220590628099536	8.763479251316284	8.784919527994672	0.17365103128765824	0	1	0	1	0	0	0	1	1	1	1	6
01010000110	9.325260323458016	9.44541423989444	9.36203513945967	9.377569900937376	0.025133767191369224	9.05121711423417	9.194856840289491	9.250921945998506	9.165665300174055	0.04205079164581557	0	1	0	1	0	0	0	0	1	1	0	4
01000010111	9.21562230289916	9.401063579025204	9.298311496197613	9.304999126040657	0.03792681553004879	9.128880036132104	9.231836013183337	9.423334733902124	9.261350261072522	0.061004385608818566	0	1	0	0	0	0	1	0	1	1	1	5
00101100001	7.0	7.0	7.0	7.0	0.0	8.38784993097884	8.883220431819174	8.787746254754934	8.686272205850983	0.10729299466602495	0	0	1	0	1	1	0	0	0	0	1	4
00011110011	8.389298640261352	8.720396603687375	8.150161809386894	8.419952351111874	0.1169021440132789	8.52552174552513	9.058311331357825	9.139995122736575	8.907942733206509	0.13623045383216334	0	0	0	1	1	1	1	0	0	1	1	6
01001111101	9.358264967609363	9.382725440956765	9.426937068785003	9.389309159117042	0.014209582321915805	9.878571001456029	9.813755436761225	9.876912022195011	9.856412820137422	0.015085463866611191	0	1	0	0	1	1	1	1	1	0	1	7
01010010101	9.231935302473092	9.3990277365526	9.306619649070665	9.312527562698786	0.03417149875805794	8.200475090901643	9.231548086134756	8.904102357580753	8.778708511539051	0.21508548410790598	0	1	0	1	0	0	1	0	1	0	1	5
00011111101	9.128463959823693	9.243459245262935	9.083196674850315	9.151706626645648	0.033729781696008355	9.552868239198848	9.41793573230272	9.504809853813896	9.491871275105154	0.02792027479738848	0	0	0	1	1	1	1	1	1	0	1	7
01001011010	8.695475754733764	9.011344426040651	8.816113238139437	8.840977806304616	0.06507295833757842	7.8369789676601425	8.713680899900552		8.275329933780348	0.25308204828903286	0	1	0	0	1	0	1	1	0	1	0	5
11010100001	9.468338689935518	9.514944562933689	9.441584719849695	9.4749559909063	0.015156176675041799	9.36262010327232	9.37771138077342	9.402165533241163	9.380832339095635	0.008147244355117057	1	1	0	1	0	1	0	0	0	0	1	5
01001011100	8.741144404538916	9.014866480049438	8.835732309293396	8.863914397960585	0.056754759340342006	7.9313138385838355	9.024733302605217		8.478023570594527	0.3156430109449604	0	1	0	0	1	0	1	1	1	0	0	5
10001100011	8.343769130294195	8.572795338558869	8.266603511299548	8.394389326717537	0.06501302687994379	8.802371170553277	9.157644676496343	9.200737294228766	9.053584380426129	0.08925179833549964	1	0	0	0	1	1	0	0	0	1	1	5
01010111110	9.359180389193712	9.424049394147929	9.401281943900976	9.394837242414205	0.01343594422855923	9.549446229053672	9.54487624058264	9.548996705902477	9.547773058512929	0.001028282010345319	0	1	0	1	0	1	1	1	1	1	0	7
01001100110	9.291360203947614	9.322764964886536	9.337530490004157	9.317218552946102	0.009626316729808206	9.733879319749414	9.679177851635073	9.818168208337099	9.74374179324053	0.028584760221609037	0	1	0	0	1	1	0	0	1	1	0	5
11010100101	9.399893374917172	9.44178582070708	9.46216345746826	9.434614217697503	0.01296125452084688	9.989815868629806	9.89800970225939	9.910502384507769	9.932775985132322	0.02032723136375889	1	1	0	1	0	1	0	0	1	0	1	6
01011000010	8.437409595710957	8.818582617757112	8.793343557800872	8.683111923756314	0.08702152802807844	8.591252947319191	9.14662483688509	9.218198550418547	8.98535877820761	0.14010130475982394	0	1	0	1	1	0	0	0	0	1	0	4
01010000101	8.322413371721014	8.835361681935273	8.49398183944559	8.55058563103396	0.1066004879245796	8.397115568946456	9.177286309302477	8.859715594526563	8.811372490925166	0.1601662614162116	0	1	0	1	0	0	0	0	1	0	1	4
10000100111	9.122582659358546	9.178973707929954	9.13814153602172	9.146565967770073	0.011889882796294458	9.325429922054326	9.365110762981896	9.371906037040187	9.354148907358804	0.010248000008708163	1	0	0	0	0	1	0	0	1	1	1	5
01011100110	9.360700137263894	9.433474208763984	9.46754771037917	9.42057401880235	0.02228195138799103	9.637806677138721	9.631857143457957	9.734576385563024	9.6680800687199	0.023541344315304826	0	1	0	1	1	1	0	0	1	1	0	6
01011011011	9.160698231614814	9.425709158628427	9.270377585661887	9.285594991968376	0.05436201944706153	8.186425951642232	9.009062923628075	8.651499519124883	8.61566279813173	0.16839739697521325	0	1	0	1	1	0	1	1	0	1	1	7
01101100000	8.109887971620784	8.598028779654861	7.895719622434592	8.201212124570079	0.14694931879324408	8.706073580887281	9.085385827492363	9.34919993404482	9.04688644747482	0.1319813927716898	0	1	1	0	1	1	0	0	0	0	0	4
01110101101	8.895082175769543	9.075069136722458	8.96419518961949	8.97811550070383	0.03706786079561859	9.032885636253088	9.209716174303406	9.184405115312703	9.142335641956398	0.039039809251047046	0	1	1	1	0	1	0	1	1	0	1	7
00000011111	8.375652681817952	8.745033676955677	8.346373280098632	8.489019879624086	0.09071164860825535			7.0	7.0	0.0	0	0	0	0	0	0	1	1	1	1	1	5
10111111000	9.263922149269495	9.249013230042204	9.268697010752367	9.260544130021357	0.004191679581664461	9.329236661906304	9.360164046584908	9.460478566133244	9.383293091541486	0.02800989080286592	1	0	1	1	1	1	1	1	0	0	0	7
01010101010	8.479654998156459	8.760434878402572	8.523220279427509	8.587770051995514	0.06169054511793958	7.918262022815241	8.759022780108758	8.377400212020554	8.351561671648184	0.17186253488259304	0	1	0	1	0	1	0	1	0	1	0	5
10001111111	9.275494626225584	9.335196570379876	9.339117701317226	9.316602965974228	0.014556015449660311	10.017351199010623	10.0130964209262	10.0363448708209	10.022264163585907	0.005053472755031821	1	0	0	0	1	1	1	1	1	1	1	8
00110100111	8.037498847217622	8.491792646299066	8.12580705977969	8.218366184432126	0.09833709679658179	8.409155905128397	9.004971874880958	9.071357620050343	8.828495133353233	0.14887679919795765	0	0	1	1	0	1	0	0	1	1	1	6
00100111101	8.927636581873717	9.117063262770436	8.878709459559419	8.974469768067857	0.05139413775440154	9.444695574248925	9.427409969526074	9.43747876405303	9.436528102609342	0.0035443817172167765	0	0	1	0	0	1	1	1	1	0	1	6
01100011100	8.769915269015218	9.071541835435491	8.852804012792326	8.898087039081013	0.06361677025362783	7.5497484018706515			7.5497484018706515	0.0	0	1	1	0	0	0	1	1	1	0	0	5
01100100101	8.669280645126182	8.891127213504882	8.676074840385724	8.745494233005596	0.051507708208149615	9.232618049982594	9.204826139520554	9.300055447304231	9.245833212269126	0.01999223036971333	0	1	1	0	0	1	0	0	1	0	1	5
01011000101	8.367058714765264	8.847783066485851	8.409345404680087	8.541395728643735	0.10866764439371458	8.76552515732745	9.131201325015695	9.209731754524505	9.035486078955884	0.09678234299582071	0	1	0	1	1	0	0	0	1	0	1	5
01000110011	9.384389069869997	9.496292320092822	9.360946203329185	9.413875864430667	0.029528929659026613	9.497944077839394	9.465145324308608	9.589599302185873	9.517562901444625	0.0263339825830571	0	1	0	0	0	1	1	0	0	1	1	5
00100100100	7.0	7.0	7.0	7.0	0.0	7.383351581701577			7.383351581701577	0.0	0	0	1	0	0	1	0	0	1	0	0	3
00011111100	8.960755031974108	9.092108914905156	8.956030921963407	9.00296495628089	0.031531897403665916	9.404018094237122	9.330831659282707	9.366061695911874	9.3669704831439	0.014942573328184574	0	0	0	1	1	1	1	1	1	0	0	6
01101111110	9.30477771748132	9.367949031485466	9.39472896239532	9.355818570454035	0.018855448721880864	9.69209203911644	9.717038754557326	9.698737034243411	9.702622609305726	0.005274275985001553	0	1	1	0	1	1	1	1	1	1	0	8
01001000010	8.313798189712088	8.703649655891791	8.570417155254292	8.529288333619391	0.08089574195368453	8.691752203521675	9.02790631488693	9.177429203911618	8.965695907440075	0.10154895229475212	0	1	0	0	1	0	0	0	0	1	0	3
01000100001	8.304652338943963	8.934544116744114	8.039350207058202	8.426182220915427	0.1877143965992332	8.84529365888865	9.076958219870015	9.28536249269828	9.069204790485648	0.08987049142428565	0	1	0	0	0	1	0	0	0	0	1	3
00101011100	8.664685950950254	8.961556349446754	8.580223171822798	8.735488490739936	0.08176541426513818	7.0	7.0	7.0	7.0	0.0	0	0	1	0	1	0	1	1	1	0	0	5
01111011100	9.158645175108926	9.199078290879335	9.03248986610964	9.1300711106993	0.035473660849697296	7.581128877878238			7.581128877878238	0.0	0	1	1	1	1	0	1	1	1	0	0	7
00111011100	8.83972729053527	8.947773840470031	8.861798307236079	8.883099812747126	0.023305327863599106	7.0	7.0	7.0	7.0	0.0	0	0	1	1	1	0	1	1	1	0	0	6
00000011101	8.426990140995724	8.880041469070077	8.324320205436688	8.543783938500829	0.12071807657052339	7.0	7.0	7.0	7.0	0.0	0	0	0	0	0	0	1	1	1	0	1	4
01001101000	8.129298068572322	8.514126464997501	7.8652717771950496	8.169565436921623	0.13320985773466493	8.124978479637546	8.837865046551121	8.476702382276459	8.479848636155042	0.14552161265974498	0	1	0	0	1	1	0	1	0	0	0	4
01000111001	9.391294493843011	9.458416228173217	9.416916023203939	9.422208915073389	0.013828369590145401	9.374140308505986	9.426871727532088	9.570143084069102	9.457051706702392	0.04140731691410605	0	1	0	0	0	1	1	1	0	0	1	5
11011111101	9.527071645137383	9.493184318462642	9.544185483456298	9.521480482352109	0.01059658383352942	10.167500447718432	10.049259953728992	10.109063094768496	10.108607832071973	0.024136276476184198	1	1	0	1	1	1	1	1	1	0	1	9
01000001011	7.590875171191318	7.817223852194068		7.704049511692693	0.06534123595382721	7.372272938337749			7.372272938337749	0.0	0	1	0	0	0	0	0	1	0	1	1	4
01111000010	8.324268713775895	8.889732375401776	8.571436934014514	8.595146007730728	0.11572876211728711	8.279077706044403	8.8775978897261	9.073463311023954	8.743379635598151	0.16895414918232882	0	1	1	1	1	0	0	0	0	1	0	5
00010100110	8.035881201492398	8.682670152355227	8.056735928593355	8.258429094146992	0.1500522611808107	8.009447577105076	9.066863086187283	8.584700956261146	8.553670539851169	0.21612267148112432	0	0	0	1	0	1	0	0	1	1	0	4
01000000100	8.095309763524439	8.635075215623957	8.304271048803272	8.344885342650556	0.11111092540683863	8.186294749042036	9.118444688398784	8.67582374665277	8.660187728031197	0.1903545994407314	0	1	0	0	0	0	0	0	1	0	0	2
00101011101	8.729203148204997	8.856518783499588	8.51381419869642	8.699845376800335	0.07072012581020153	7.087298365273688		7.0	7.043649182636845	0.025200867345289105	0	0	1	0	1	0	1	1	1	0	1	6
10001111101	9.287112906090425	9.280106006639901	9.348042527314568	9.30508714668163	0.01525422184166194	9.99342163951827	9.96574848183908	9.909584841404133	9.956251654253828	0.017439392574215562	1	0	0	0	1	1	1	1	1	0	1	7
01010111011	9.412867334968725	9.498598286095996	9.520194760232648	9.477220127099123	0.023175286100418288	9.302176966212354	9.383703094879893	9.437925831523149	9.374601964205132	0.027895822694928706	0	1	0	1	0	1	1	1	0	1	1	7
01101000010	8.308373624251281	8.738382505967643	8.488098296129971	8.511618142116298	0.08816820756859611	8.379588288588058	9.102912490360117	9.238454758679426	8.906985179209201	0.18850443708434844	0	1	1	0	1	0	0	0	0	1	0	4
00011100110	8.164153262185858	8.428606707286342	8.348634446297769	8.31379813858999	0.05536858677296483	8.298855009183555	9.080042145920824	9.059282595513912	8.81272658353943	0.18173044871068147	0	0	0	1	1	1	0	0	1	1	0	5
01010110010	9.392430932886779	9.454433260463595	9.409256908737477	9.418707034029284	0.013089759402288856	9.068243301998557	9.26401619118327	9.426722041594317	9.252993844925381	0.0732778624748667	0	1	0	1	0	1	1	0	0	1	0	5
01101000011	8.253531655225617	8.696632986488924	8.438934161285102	8.463032934333214	0.0908480971995259	8.529830238886731	9.073337459588004	9.00359255153139	8.868920083335375	0.12072871103298122	0	1	1	0	1	0	0	0	0	1	1	5
01010001110	8.412674368364456	8.6329363365925	8.564412959488676	8.536674554815212	0.04601792763386655	7.83539721152189	8.785906547752662		8.310651879637277	0.2743884105700442	0	1	0	1	0	0	0	1	1	1	0	5
01011101000	8.204125211397644	8.694195239952325	8.249742326539279	8.382687592629749	0.1105275162224292	7.582077852734859	8.304250365794871		7.943164109264865	0.20847324740827344	0	1	0	1	1	1	0	1	0	0	0	5
10001100001	8.11861823770978	8.520662764706179	7.903676984250432	8.180985995555464	0.12785745072486657	8.622186285769311	9.082950401076053	9.213277939148359	8.97280487533124	0.12678483302088012	1	0	0	0	1	1	0	0	0	0	1	4
10001011011	9.449085639922579	9.38750800622074	9.455004445230184	9.430532697124502	0.015259429241130827	8.739051722197535	9.145995661326822	9.115909316674145	9.000318900066167	0.09257582541464722	1	0	0	0	1	0	1	1	0	1	1	6
11001011101	9.519128795930056	9.561160307975676	9.57377210428891	9.55135373606488	0.011680463936144185	9.561069448413328	9.557189362055276	9.538102849018896	9.552120553162501	0.00501889412835279	1	1	0	0	1	0	1	1	1	0	1	7
00010111100	8.923786464143278	9.062561181869574	8.930253363400839	8.97220033647123	0.03197464355373227	9.343383059094526	9.354429405241518	9.319437962144114	9.339083475493387	0.007302569032734368	0	0	0	1	0	1	1	1	1	0	0	5
00010010111	8.643870220608129	9.023748680838256	8.712957939294624	8.793525613580336	0.08260879063550042						0	0	0	1	0	0	1	0	1	1	1	5
01010111001	9.431519758303873	9.514321273189823	9.499921087778064	9.48192070642392	0.018060237233228898	9.32396785607285	9.441235452129023	9.490737100137947	9.41864680277994	0.03496588933296964	0	1	0	1	0	1	1	1	0	0	1	6
00010111110	8.907429894954149	9.130922615332242	8.8783690925883	8.972240534291563	0.05641532695270999	8.87688073654149	9.218268312534544	9.272633357003727	9.12259413535992	0.08757872200123025	0	0	0	1	0	1	1	1	1	1	0	6
10010111101	9.389629040196233	9.405079787205382	9.401088643618749	9.398599157006787	0.0032743842545464984	9.884398778563266	9.927938635016515	9.849345816854916	9.887227743478233	0.01607384028223673	1	0	0	1	0	1	1	1	1	0	1	7
01110011110	9.228014612454352	9.417724242335057	9.270814617950345	9.305517824246584	0.04062156716326524	8.014975648730946	8.767037026083576	8.410052538095874	8.397355070970134	0.15357951148072066	0	1	1	1	0	0	1	1	1	1	0	7
01011010110	9.400222832860774	9.532917122386298	9.402127573756117	9.445089176334397	0.03105430214490267	9.163687203047283	9.240651914450662	9.338581970712733	9.247640362736893	0.03578564364442553	0	1	0	1	1	0	1	0	1	1	0	6
00011101000	7.0	7.0	7.0	7.0	0.0	7.0	7.0	7.0	7.0	0.0	0	0	0	1	1	1	0	1	0	0	0	4
00010111101	9.129376705374623	9.303302377251184	9.06512408837868	9.165934390334828	0.0503066804208542	9.435285556935069	9.388845614669755	9.33441363377367	9.386181601792833	0.020611925933085973	0	0	0	1	0	1	1	1	1	0	1	6
00000100101	7.0	7.0		7.0	0.0	7.448517737449161			7.448517737449161	0.0	0	0	0	0	0	1	0	0	1	0	1	3
11010111101	9.51802418926416	9.509122497553454	9.552038935368762	9.52639520739546	0.009246716688503392	10.14465067392609	10.042776565670838	10.121312865733655	10.102913368443529	0.021788718826485136	1	1	0	1	0	1	1	1	1	0	1	8
01101011100	8.918206086681716	9.068949488446146	9.022614025323485	9.003256533483782	0.03152228751645732	7.826032935862187	8.775481847930546	8.4521850028433	8.351233262212011	0.19706460430076939	0	1	1	0	1	0	1	1	1	0	0	6
01000110010	9.303467052376936	9.451598698365974	9.334504441850523	9.363190064197811	0.03189277565255127	9.212538202545039	9.31860871658427	9.377933330147066	9.303026749758791	0.03420766319173583	0	1	0	0	0	1	1	0	0	1	0	4
00000000111	8.372113572107889	8.691697072972381	8.565407490190157	8.543072711756809	0.06571090124166534	7.441028811858243			7.441028811858243	0.0	0	0	0	0	0	0	0	0	1	1	1	3
00111100100	7.0	7.0	7.0	7.0	0.0	7.104648190113249		7.0	7.052324095056624	0.03020933036604566	0	0	1	1	1	1	0	0	1	0	0	5
00001011101	8.547624097049658	8.806139835585203	8.447190898412451	8.600318277015772	0.07560157882620333			7.0	7.0	0.0	0	0	0	0	1	0	1	1	1	0	1	5
01111111101	9.407056087885042	9.430152320872065	9.459790831113997	9.432333079957035	0.010792011462929114	9.712743295784936	9.750546740440493	9.780733753484657	9.748007929903363	0.01390749051028495	0	1	1	1	1	1	1	1	1	0	1	9
01011110001	9.452740916858527	9.518635380768623	9.406056602718886	9.459144300115346	0.02309129635686462	9.456888395059384	9.418303475242633	9.457318275626696	9.444170048642905	0.009145635698055245	0	1	0	1	1	1	1	0	0	0	1	6
01000111011	9.296611820847538	9.42019983689152	9.349677391239256	9.355496349659438	0.02531104711136931	9.394771798504085	9.42830384367529	9.459588357520154	9.42755466656651	0.013233275800207485	0	1	0	0	0	1	1	1	0	1	1	6
00110111111	9.206027864733704	9.394733269958456	9.13694611434786	9.245902416346674	0.054476354655333445	9.020668092261372	9.225575646531258	9.275598309524849	9.173947349439159	0.055145964968698134	0	0	1	1	0	1	1	1	1	1	1	8
00001111100	8.721645410034384	8.899099251120026	8.706325235465428	8.775689965539947	0.04374369623680097	9.407654947026858	9.395028902906914	9.400725826170211	9.401136558701326	0.0025813682882915093	0	0	0	0	1	1	1	1	1	0	0	5
01110100011	8.967482144891248	9.200644507501414	8.982561632830066	9.050229428407576	0.053268767824477245	9.205978435591351	9.26534443904769	9.355564777210402	9.275629217283148	0.03074993468084456	0	1	1	1	0	1	0	0	0	1	1	6
10010111100	9.326083708294053	9.304459305385617	9.31554674602419	9.31536325323462	0.004414539471818607	9.792926091438174	9.796279185240364	9.740046979545195	9.776417418741245	0.012877094942809083	1	0	0	1	0	1	1	1	1	0	0	6
01101110011	9.349165093547427	9.383882595544225	9.356216940907952	9.363088209999868	0.007491517318769776	9.523782262908707	9.531167932210971	9.492856163448415	9.515935452856032	0.008297863454236986	0	1	1	0	1	1	1	0	0	1	1	7
11000111001	9.408912222225213	9.412859404206849	9.457931545843653	9.426567724091905	0.011118018765016944	10.023365210489835	10.017745828120304	10.036346053681573	10.025819030763904	0.0038946121583881763	1	1	0	0	0	1	1	1	0	0	1	6
01111100100	8.953703252039784	9.119270885217096	9.265529054754882	9.112834397337254	0.06369184156533109	9.264296244962381	9.168308267175442	9.406058417718716	9.27955430995218	0.04882944796476483	0	1	1	1	1	1	0	0	1	0	0	6
10010100101	9.134330175902369	9.195149907231276	9.12222975018606	9.150569944439901	0.01595376072429954	9.189697939152518	9.205938574538207	9.184885102626154	9.19350720543896	0.0045036106277568	1	0	0	1	0	1	0	0	1	0	1	5
01011011001	9.046452483675369	9.31786931729138	9.186315330159688	9.183545710375478	0.05541138193525362	8.314436804905041	9.03851005941848	8.605878673390919	8.652941845904813	0.14873450963082122	0	1	0	1	1	0	1	1	0	0	1	6
01000001101	7.527159604493483	7.860893978298036		7.69402679139576	0.09634081527694502			7.0	7.0	0.0	0	1	0	0	0	0	0	1	1	0	1	4
01000000110	9.112610162169377	9.304202661744547	9.194993989723166	9.203935604545697	0.039236220150288235	9.141227089978054	9.169616347354495	9.378165178044208	9.22966953845892	0.052819983143187185	0	1	0	0	0	0	0	0	1	1	0	3
00101100110	8.104538537352267	8.528913293293899	8.242604463331388	8.292018764659185	0.08836931335020048	8.653680319016745	9.048317783282238	9.17748633671573	8.959828146338237	0.11140466621681389	0	0	1	0	1	1	0	0	1	1	0	5
10000100010	8.05989887619635	8.332393831158226	8.160516445867469	8.184269717740682	0.05625320518783927	8.294833426987475	9.00694246985835	9.048134728687735	8.78330354184452	0.172904834315589	1	0	0	0	0	1	0	0	0	1	0	3
01111101111	9.203109714185091	9.297246727351084	9.258906778401855	9.253087739979344	0.019325459106558404	9.181992527472882	9.238152818243533	9.253650363985308	9.224598569900573	0.015392095479592346	0	1	1	1	1	1	0	1	1	1	1	9
01101100011	8.510461323899378	8.783857888739076	8.616708201200874	8.637009137946443	0.056266503417660436	9.319074470464054	9.241118234527516	9.353302332449195	9.30449834581359	0.023472201693331644	0	1	1	0	1	1	0	0	0	1	1	6
01100100000	7.934889659274286	8.703573615291486	7.6969472144878255	8.111803496351198	0.21478596206871087	8.704041662693996	9.062694095971851	9.259208802680712	9.008648187115519	0.11492269759011763	0	1	1	0	0	1	0	0	0	0	0	3
11100111100	9.407957156308624	9.412700068943339	9.446241658247926	9.422299627833297	0.008519970856233591	10.067603572593189	10.037367809148336	10.11543718486768	10.073469522203068	0.016070230655476418	1	1	1	0	0	1	1	1	1	0	0	7
01011000100	8.279235396289323	8.815741363120962	8.538280899335998	8.544419219582094	0.10953532333077962	8.063029751165308	8.883774047962467	8.560925165025731	8.502576321384502	0.16879906242184675	0	1	0	1	1	0	0	0	1	0	0	4
01110111010	9.386516165018984	9.414918720890382	9.365398232165537	9.388944372691634	0.010144718209188225	8.966475940015618	9.266559859138367	9.403697300244461	9.21224436646615	0.0912900679320769	0	1	1	1	0	1	1	1	0	1	0	7
01001100101	8.760250198947919	8.930681983858062	8.794335074876484	8.828422419227488	0.03681758775954832	9.260845078814366	9.301873875068923	9.334493683600561	9.299070879161285	0.015066086841434985	0	1	0	0	1	1	0	0	1	0	1	5
00010101100	7.0	7.0	7.0	7.0	0.0	7.302584940305987		7.0	7.151292470152994	0.0873487483691943	0	0	0	1	0	1	0	1	1	0	0	4
00001100111	7.986427577921632	8.79961855823365	8.134798850312992	8.306948328822758	0.17679860238351883	8.344049517278721	9.111670185284844	9.148597294496694	8.868105665686754	0.18543509100755523	0	0	0	0	1	1	0	0	1	1	1	5
00011100001	7.0	7.0	7.0	7.0	0.0	7.177415509870106		7.0	7.088707754935053	0.051215446190960204	0	0	0	1	1	1	0	0	0	0	1	4
01000001110	8.132540915255642	8.226295853942664		8.179418384599153	0.02706471954440451	8.08871527752007	9.01006762114608	8.624810226293	8.574531041653051	0.18890850191840183	0	1	0	0	0	0	0	1	1	1	0	4
00101110011	8.223456015875321	8.783034170074776	7.832779610235883	8.27975659872866	0.19498856754772043	8.8438926224347	9.168775172869552	9.253297586283463	9.088655127195905	0.08823975143046565	0	0	1	0	1	1	1	0	0	1	1	6
01011001011	8.274253657264111	8.698420688015167	8.335597284371156	8.436090543216812	0.09358916318953699	7.490748738936506			7.490748738936506	0.0	0	1	0	1	1	0	0	1	0	1	1	6
10001100111	9.115054992924842	9.130435954176088	9.110378237724033	9.11862306160832	0.004284202238365075	9.396664747395027	9.411432793191539	9.380112522163296	9.39607002091662	0.006396680376162967	1	0	0	0	1	1	0	0	1	1	1	6
01111100011	8.80030385976598	9.078690747538207	9.049870311009762	8.97628830610465	0.06249739781952065	9.225093571801516	9.272284630070065	9.374844324965057	9.290740842278879	0.031256454920236265	0	1	1	1	1	1	0	0	0	1	1	7
01011101011	8.911812388876754	9.08263958074978	8.957011840969342	8.983821270198625	0.036135258618385895	8.64112444868919	9.034658740061722	9.133094532176203	8.93629257364237	0.10627446211232512	0	1	0	1	1	1	0	1	0	1	1	7
11110111111	9.498329553232116	9.519476462767207	9.542925452086768	9.520243822695363	0.00910714169949513	10.096195201597633	10.045446373587154	10.114508529914316	10.085383368366367	0.014606318053641737	1	1	1	1	0	1	1	1	1	1	1	10
01011010100	9.087181486716835	9.343984169519617	9.311859512760833	9.247675056332428	0.05712068774232018	8.375293703550401	9.239193645633524	9.05587481189412	8.890120720359349	0.18582545198303416	0	1	0	1	1	0	1	0	1	0	0	5
01011101010	8.445711776961138	8.74590668441733	8.616769881015381	8.602796114131282	0.06147586957004101	8.297440810611738	8.95237666870384	8.7459547020381	8.66525739378456	0.13669874799672624	0	1	0	1	1	1	0	1	0	1	0	6
10001100010	8.127183939883043	8.404635518111334	8.218246709674595	8.250022055889657	0.05773805653647874	8.447624381926339	9.09596468700235	9.297183425833133	8.946924164920608	0.18124451724477783	1	0	0	0	1	1	0	0	0	1	0	4
01000001010	7.256960460941363	7.5077244240614815		7.382342442501422	0.072389320805229			7.0	7.0	0.0	0	1	0	0	0	0	0	1	0	1	0	3
01101100110	9.347695095318224	9.343250541881318	9.420931204434767	9.370625613878103	0.01780883603137513	9.617392591490503	9.681555148020069	9.746408459905547	9.681785399805372	0.026335379680939505	0	1	1	0	1	1	0	0	1	1	0	6
01110011100	8.981938977574677	9.23906906230504	9.192061598697515	9.137689879525745	0.05589600910415612						0	1	1	1	0	0	1	1	1	0	0	6
01010100000	8.225383122455101	8.822750493761827	8.457554065324766	8.501895893847232	0.12294076649143804	8.391481142963238	9.04423516682068	9.358273064226315	8.931329791336745	0.2013423173829272	0	1	0	1	0	1	0	0	0	0	0	3
11010100110	9.384695262699346	9.431403810259873	9.436983793703764	9.417694288887661	0.011722384931128956	9.978800763238102	9.923230644897805	9.956600543096599	9.952877317077501	0.011419328074808183	1	1	0	1	0	1	0	0	1	1	0	6
00001111101	8.848119589972976	8.992506273469079	8.677909876481761	8.83951191330794	0.06428879156137023	9.473473021216419	9.494698600916026	9.503105270511732	9.490425630881392	0.006234464080984935	0	0	0	0	1	1	1	1	1	0	1	6
00111110000	8.148968357474788	8.469633504536272	7.754286358993842	8.124296073668301	0.14627994043961082	8.596344346902661	9.004784866815305	9.152735547549744	8.917954920422572	0.11764875104330645	0	0	1	1	1	1	1	0	0	0	0	5
01111111111	9.398385849045964	9.421406921571752	9.441066719421151	9.420286496679623	0.008721197241492252	9.53590007424098	9.634765273212762	9.674185427104486	9.614950258186076	0.029083746375845453	0	1	1	1	1	1	1	1	1	1	1	10
01010111010	9.350231892048157	9.431346007459119	9.387625419964273	9.38973443982385	0.01657413096415507	9.018419513156998	9.220571498205064	9.381093347799805	9.206694786387288	0.07419287918637563	0	1	0	1	0	1	1	1	0	1	0	6
01010010110	9.364943827870448	9.56704106759285	9.350042594794774	9.427342496752692	0.049484475188152355	9.217896257883304	9.255759826933355	9.403772028326316	9.292476037714325	0.04010093641888815	0	1	0	1	0	0	1	0	1	1	0	5
00110100110	8.041581352922629	8.530750946412782	8.095644563363429	8.222658954232946	0.10948456087107782	8.22001465685826	9.197648480822837	9.062440855520931	8.826701331067342	0.21626442764283718	0	0	1	1	0	1	0	0	1	1	0	5
10010100100	9.056616684822428	9.085047294601052	8.969820440506597	9.037161473310027	0.024505733741890096	8.939163901711554	9.132673447650095	9.209066274188947	9.093634541183533	0.05679619974201641	1	0	0	1	0	1	0	0	1	0	0	4
01111010111	9.419675793479453	9.551490379102967	9.393745356341752	9.454970509641392	0.03453298132027291	9.225323146925737	9.247131152809787	9.350891393708606	9.274448564481377	0.027390773645387705	0	1	1	1	1	0	1	0	1	1	1	8
10000100101	8.916705072221722	9.026098741662148	8.915603636347885	8.952802483410585	0.02591511590914291	9.223244634280752	9.219783856729393	9.264114211015206	9.23571423400845	0.010065727874022183	1	0	0	0	0	1	0	0	1	0	1	4
01011001100	7.884217870576613	8.078552566794917		7.981385218685765	0.05609959458726096			7.0	7.0	0.0	0	1	0	1	1	0	0	1	1	0	0	5
00011100011	7.0	7.0	7.0	7.0	0.0	7.286859816256705			7.286859816256705	0.0	0	0	0	1	1	1	0	0	0	1	1	5
01001100001	8.188371869850386	8.863157332460322	8.147449973035227	8.399659725115312	0.164083908626374	8.922383145501932	9.16236543435164	9.253566695578117	9.11277175847723	0.06983944142975165	0	1	0	0	1	1	0	0	0	0	1	4
00010111000	8.617604583863237	8.883727040068601	8.579808704299296	8.693713442743713	0.0676215048440731	8.942322202825164	9.174518437666073	9.281442758457052	9.132761132982763	0.07077951938217636	0	0	0	1	0	1	1	1	0	0	0	4
01111010110	9.482210492977446	9.509681118319083	9.481476342819919	9.49112265137215	0.006563120011076725	9.247796139850793	9.334937376156539	9.423683721410411	9.335472412472582	0.035903400569252966	0	1	1	1	1	0	1	0	1	1	0	7
10011111100	9.322841180206089	9.328778604672744	9.348879465725599	9.333499750201478	0.005570981205115346	9.860392323285696	9.792524665002071	9.722600460886946	9.791839149724906	0.02812769034310442	1	0	0	1	1	1	1	1	1	0	0	7
00011100111	8.113636250923092	8.525413486946903	8.364789826457432	8.334613188109143	0.08472808974729588	8.382229128358201	9.02660586928729	9.054899582907561	8.82124486018435	0.15532291264263173	0	0	0	1	1	1	0	0	1	1	1	6
01111011000	8.825044007288284	9.059787320984595	8.824949803935159	8.90326037740268	0.05534063496336454	7.280364677591761			7.280364677591761	0.0	0	1	1	1	1	0	1	1	0	0	0	6
01010000000	7.3248914859241925	7.967268432480911	7.619959187424304	7.637373035276469	0.13126910460300445	7.0			7.0	0.0	0	1	0	1	0	0	0	0	0	0	0	2
01000011101	8.868570650166477	9.127269928800462	8.988209781989626	8.994683453652188	0.05285634700145934	8.106462572929049	9.100713226949527	8.800032323411104	8.669069374429894	0.2081654235055334	0	1	0	0	0	0	1	1	1	0	1	5
00000100010	7.0	7.0	7.0	7.0	0.0	7.0	7.0	7.0	7.0	0.0	0	0	0	0	0	1	0	0	0	1	0	2
00011100000	7.0	7.0	7.0	7.0	0.0	7.0	7.0	7.0	7.0	0.0	0	0	0	1	1	1	0	0	0	0	0	3
00010011100	8.669966710572474	8.833721617272413	8.583672725851784	8.69578701789889	0.05185095342741919	7.0	7.0	7.0	7.0	0.0	0	0	0	1	0	0	1	1	1	0	0	4
01110011101	9.273761635615564	9.493937863685304	9.254137225340589	9.340612241547152	0.0543565990668697	7.827531819619723	8.736971082336039		8.282251450977881	0.26253250157043995	0	1	1	1	0	0	1	1	1	0	1	7
01011101101	9.085033946053084	9.194308025621442	8.986626664237063	9.08865621197053	0.042412120072764986	9.163720051545106	9.119529006996434	9.320591584566877	9.201280214369472	0.043136632534236156	0	1	0	1	1	1	0	1	1	0	1	7
10100100111	9.164231736125547	9.163063876538306	9.154410446836863	9.16056868650024	0.0021902781717382624	9.353326146771646	9.413945534230702	9.447325819876898	9.404865833626415	0.01945428555302215	1	0	1	0	0	1	0	0	1	1	1	6
01011000111	9.347221219964453	9.416919766535427	9.424299871325665	9.396146952608516	0.017363332882578585	9.216091900441583	9.311977177994008	9.385371323991414	9.304480134142336	0.03465553120649528	0	1	0	1	1	0	0	0	1	1	1	6
00100101100	7.0	7.0	7.0	7.0	0.0	7.607055145711162			7.607055145711162	0.0	0	0	1	0	0	1	0	1	1	0	0	4
00100100101	7.0	7.0	7.0	7.0	0.0	7.655216717337947			7.655216717337947	0.0	0	0	1	0	0	1	0	0	1	0	1	4
10110100110	9.214144526862944	9.169686366282805	9.166825226905116	9.183552040016956	0.01083183362594661	9.300119311995182	9.281417302512663	9.343754699259016	9.308430437922288	0.013059440192891032	1	0	1	1	0	1	0	0	1	1	0	6
10010111110	9.34915121493176	9.327896287686409	9.36160662133442	9.34621804131753	0.006958798737970497	10.013605062291079	9.930881113783576	9.777430393482897	9.90730552318585	0.048924218441530075	1	0	0	1	0	1	1	1	1	1	0	7
00101100111	8.043443676212819	8.549369501232206	8.268183802922689	8.286998993455905	0.10348570243556018	8.747644471111338	9.047123472496754	9.127248637034251	8.97400552688078	0.08168486821808241	0	0	1	0	1	1	0	0	1	1	1	6
00010100000	7.0	7.0	7.0	7.0	0.0	7.0	7.0	7.0	7.0	0.0	0	0	0	1	0	1	0	0	0	0	0	2
00110101101	7.0	7.0	7.0	7.0	0.0	7.572718409838935			7.572718409838935	0.0	0	0	1	1	0	1	0	1	1	0	1	6
01100101100	8.433817433708006	8.845827704133681	8.681612144576285	8.653752427472657	0.08467608734847569	8.916491205830297	9.118817535214376	9.24411955766719	9.093142766237287	0.06749009748765597	0	1	1	0	0	1	0	1	1	0	0	5
01100101101	8.507832869326313	8.776354508251664	8.877508714107922	8.7205653638953	0.07799506290439218	9.128675940887225	9.194075901754301	9.16040143412747	9.161051092256331	0.013351686922863978	0	1	1	0	0	1	0	1	1	0	1	6
01100100110	9.299061304936588	9.318394321344575	9.321055628097346	9.312837084792838	0.004900675487351237	9.58868563409726	9.640470942644509	9.635093121592504	9.621416566111424	0.011624081846922622	0	1	1	0	0	1	0	0	1	1	0	5
00001100100	7.0	7.0	7.0	7.0	0.0	7.54360231093584			7.54360231093584	0.0	0	0	0	0	1	1	0	0	1	0	0	3
00001011100	8.418128542057827	8.793167697202595	8.383139114934442	8.531478451398288	0.0927963819605644	7.0		7.0	7.0	0.0	0	0	0	0	1	0	1	1	1	0	0	4
00010111010	8.297651226090652	8.60996767722163	8.22516978347808	8.377596228930122	0.08347729967544061	8.396873040200807	8.8816887852915	9.285363398246368	8.854641741246224	0.18161425973230197	0	0	0	1	0	1	1	1	0	1	0	5
01001110000	9.28184722195651	9.417632831971178	9.291562606264618	9.330347553397436	0.030923661557765804	9.36489439241654	9.426484498022884	9.461626571274936	9.41766848723812	0.01998987302482176	0	1	0	0	1	1	1	0	0	0	0	4
11010111100	9.482515519502577	9.469993020783493	9.478354324650457	9.476954288312175	0.002603629513254811	10.072193559422082	9.992637936549164	10.069052335183644	10.044627943718297	0.018392423514923657	1	1	0	1	0	1	1	1	1	0	0	7
00111100110	8.172779186565599	8.624872976820889	8.394611650458714	8.397421271281734	0.09228860463578864	8.279379837190003	9.114470352656287	9.237901074285707	8.877250421377333	0.21287543788871138	0	0	1	1	1	1	0	0	1	1	0	6
00101100000	7.0	7.0	7.0	7.0	0.0						0	0	1	0	1	1	0	0	0	0	0	3
11110100111	9.405913270301667	9.457074744486977	9.480014749720011	9.447667588169551	0.015487243436035612	10.011203624194273	10.00960577072805	10.039117698545382	10.019975697822568	0.00677557411686799	1	1	1	1	0	1	0	0	1	1	1	8
11001111100	9.422668665329939	9.396339727598152	9.449923037159683	9.422977143362592	0.010938191006089665	10.112082690877315	10.025311834833557	10.081925801067552	10.073106775592809	0.017984376425038032	1	1	0	0	1	1	1	1	1	0	0	7
10100111101	9.264493585252724	9.296881770131144	9.328301463147918	9.296558939510595	0.013025228629337995	10.044237613740247	9.993339390818868	9.964324144046543	10.000633716201886	0.016514872321217212	1	0	1	0	0	1	1	1	1	0	1	7
00110101100	7.0	7.0	7.0	7.0	0.0	7.315968370120058			7.315968370120058	0.0	0	0	1	1	0	1	0	1	1	0	0	5
11101111101	9.460421193087232	9.43908781605292	9.493148701339962	9.464219236826706	0.011116531845933194	10.181594579915297	10.078856349427477	10.10292352648942	10.121124818610731	0.02193646612798754	1	1	1	0	1	1	1	1	1	0	1	9
10110111111	9.34478584155986	9.410861181766963	9.386531019075976	9.380726014134266	0.01364283210854121	10.072055582239605	10.017605888393993	9.924678755070357	10.00478007523465	0.030423013243862398	1	0	1	1	0	1	1	1	1	1	1	9
00010010110	8.620157367761584	8.80870739233826	8.686766207637683	8.705210322579175	0.03903613064403181	7.411618199162192			7.411618199162192	0.0	0	0	0	1	0	0	1	0	1	1	0	4
10100111100	9.21565727633285	9.205909264337311	9.262915944881149	9.228160828517105	0.012447854698535054	9.952009519693876	9.911994011919932	9.868089122576949	9.91069755139692	0.017136310719645755	1	0	1	0	0	1	1	1	1	0	0	6
01001010111	9.279535691857241	9.389281875587312	9.296949917262287	9.32192249490228	0.024078961897327517	9.215466807037188	9.309213505449943	9.347515761584763	9.290732024690632	0.02773507240411633	0	1	0	0	1	0	1	0	1	1	1	6
10000010100	9.408615195770876	9.426312559444822	9.436926720869462	9.423951492028387	0.005839043769612085			7.0	7.0	0.0	1	0	0	0	0	0	1	0	1	0	0	3
01010110000	9.384093224755272	9.420677700384509	9.469932655449707	9.424901193529829	0.017585412450132232	9.245535862998473	9.235201363381323	9.454798923451248	9.311845383277015	0.05058571349179502	0	1	0	1	0	1	1	0	0	0	0	4
01000111010	9.300016438916579	9.369355321208742	9.285722802635664	9.318364854253662	0.01826242864350929	9.259244898634703	9.332589713379967	9.434834389946415	9.342223000653696	0.03600351263545927	0	1	0	0	0	1	1	1	0	1	0	5
01111100001	8.404088088232355	8.825572887723071	8.271574241023853	8.500411738993092	0.1181011638441446	8.69219287893738	9.087806955117056	9.203272540676792	8.99442412491041	0.10942339016710165	0	1	1	1	1	1	0	0	0	0	1	6
00011011010	8.407560142424254	8.772455894499517	8.462580041022438	8.54753202598207	0.08031174393374763	7.0	7.0	7.0	7.0	0.0	0	0	0	1	1	0	1	1	0	1	0	5
00100010111	8.60678132318854	8.976955319863483	8.641042633278229	8.741593092110085	0.08350647982047828	7.627153995504153	8.376299338784122		8.001726667144137	0.21625963280242244	0	0	1	0	0	0	1	0	1	1	1	5
01001000001	7.5781412747579555	8.219234473773591		7.898687874265773	0.1850676655136578						0	1	0	0	1	0	0	0	0	0	1	3
00000111011	8.413604810490089	8.803411088598406	8.576624099428878	8.59787999950579	0.07992297706669882	9.072017326277576	9.223556257721848	9.443608612233122	9.246394065410849	0.07627930589239558	0	0	0	0	0	1	1	1	0	1	1	5
10101100010	8.224438696084121	8.46078357656436	8.19084793681845	8.292023403155644	0.06005841860738043	8.6243288340352	9.115091664799953	9.295865017308873	9.011761838714675	0.14186143537536514	1	0	1	0	1	1	0	0	0	1	0	5
01001101101	8.584223044295765	8.820275742250614	8.644006541670121	8.6828351094055	0.050101500821210274	9.168333702685409	9.190187092398192	9.258104860465137	9.205541885182912	0.01911169989986271	0	1	0	0	1	1	0	1	1	0	1	6
00100111100	8.845593272832481	9.012499714241898	8.724955241947791	8.861016076340723	0.05894750918934069	9.448732404119628	9.397563603823533	9.408148485910225	9.418148164617795	0.01102691186466388	0	0	1	0	0	1	1	1	1	0	0	5
00011111110	8.942996681456501	9.13174486551254	9.043216937742896	9.039319494903978	0.03855269508872456	9.135397643545883	9.303485998992171	9.329092492544351	9.255992045027467	0.042955753164420775	0	0	0	1	1	1	1	1	1	1	0	7
00001100000	7.0	7.0	7.0	7.0	0.0	7.0	7.0	7.0	7.0	0.0	0	0	0	0	1	1	0	0	0	0	0	2
01100111101	9.319287222743439	9.377215238737627	9.359434875427867	9.351979112302978	0.01211476414742611	9.843317204315426	9.881512164016343	9.781572995927908	9.835467454753227	0.02058791415569683	0	1	1	0	0	1	1	1	1	0	1	7
00000011110	8.329041318256737	8.754593899273928	8.300809400195106	8.461481539241923	0.1037909774514851	7.0	7.0	7.0	7.0	0.0	0	0	0	0	0	0	1	1	1	1	0	4
01000101111	9.055869583695644	9.166081945717233	9.139161350622038	9.12037096001164	0.023457409170888704	9.338977958174503	9.309568476300102	9.331494764130847	9.32668039953515	0.006239831539865483	0	1	0	0	0	1	0	1	1	1	1	6
01111001101	8.225913251701678	8.25397760309335	8.179792422947509	8.219894425914179	0.015291773039845809			7.0	7.0	0.0	0	1	1	1	1	0	0	1	1	0	1	7
11010100111	9.444527597246037	9.465541549152636	9.476919412226447	9.462329519541706	0.006708766281234913	10.077884407731618	9.95511013937101	10.03130962038974	10.021434722497455	0.02530321273790454	1	1	0	1	0	1	0	0	1	1	1	7
00011111111	9.196661518366922	9.395475665576797	9.274476182712213	9.288871122218644	0.040900645869478246	9.338437198997903	9.335240425577172	9.387860189161822	9.353845937912299	0.012043544647964739	0	0	0	1	1	1	1	1	1	1	1	8
01101101111	9.079444315921542	9.127777547365596	9.113712628022117	9.106978163769751	0.010149220594302859	9.373303977761664	9.332789925849932	9.332324541774012	9.346139481795204	0.009604569454331264	0	1	1	0	1	1	0	1	1	1	1	8
10001011000	9.365031283834082	9.367490071166637	9.312752775239998	9.34842471008024	0.012621916192490187	7.758048931141674	8.695826776346214		8.226937853743944	0.27071314568445437	1	0	0	0	1	0	1	1	0	0	0	4
00000100011	7.0	7.0	7.0	7.0	0.0	7.774170585604621	8.270922719401609		8.022546652503115	0.14339998908410614	0	0	0	0	0	1	0	0	0	1	1	3
11101100010	9.332843142429704	9.353347330617657	9.377334251545003	9.354508241530787	0.009090979807740995	9.742857210673751	9.7487647504259	9.69768204700828	9.729768002702643	0.011408010132477891	1	1	1	0	1	1	0	0	0	1	0	6
11100100100	9.257889111902529	9.353395207328873	9.315655747110627	9.308980022114008	0.019637453772783916	9.91584451302634	9.914412544149435	9.881024293983222	9.903760450386331	0.008043757825234518	1	1	1	0	0	1	0	0	1	0	0	5
01101111111	9.284032891651695	9.379887828492596	9.418369942180595	9.360763554108296	0.02824274003835795	9.832981756814569	9.852359097592258	9.84893340748197	9.844758087296265	0.004221873752524665	0	1	1	0	1	1	1	1	1	1	1	9
10110100100	9.089732557342936	9.095679177288776	9.091739253965963	9.092383662865892	0.0012350451623183967	9.092565438488519	9.221265646757194	9.263606860355306	9.19247931520034	0.03636683851608257	1	0	1	1	0	1	0	0	1	0	0	5
01111011111	9.422897210162507	9.521194481174824	9.316856307324901	9.420315999554077	0.04172033738524918	8.540014814853032	9.065150977479924	9.290340843762856	8.965168878698604	0.15718598457052632	0	1	1	1	1	0	1	1	1	1	1	9
01001010100	8.932071336381973	9.113531153456428	9.022854889590073	9.022819126476158	0.03704033221238678	8.488791998758519	9.016575909215424	9.384933195822393	8.963433701265444	0.18388643776713462	0	1	0	0	1	0	1	0	1	0	0	4
00110111101	9.171962035856927	9.39327435846286	9.119690039241833	9.228308811187206	0.059292093695110855	9.351811911742784	9.440464917273175	9.435015330620734	9.409097386545566	0.02028399909701245	0	0	1	1	0	1	1	1	1	0	1	7
01000001111	8.225346333713388	8.635769057081362	8.414214868914629	8.425110086569793	0.08386569848077657	8.207323159169551	9.090643816384944	8.879683841441448	8.725883605665315	0.1883280516631613	0	1	0	0	0	0	0	1	1	1	1	5
10010100001	8.299390989152348	8.662809116900771	8.425042176998456	8.462414094350525	0.07534993812093194	8.255431531601351	9.044751398666909	8.95871544874815	8.752966126338803	0.17677954769053758	1	0	0	1	0	1	0	0	0	0	1	4
11001111111	9.453457282352776	9.473867807174347	9.513885779872536	9.48040362313322	0.012549491993769538	10.181275002192502	10.0611549033001	10.139015632642911	10.127148512711836	0.02487579459727187	1	1	0	0	1	1	1	1	1	1	1	9
01110000110	9.34245002491495	9.425151322763787	9.39884804766408	9.388816465114273	0.01724988238032717	9.183685168481631	9.29763263387807	9.263826465675386	9.248381422678362	0.02389183344594658	0	1	1	1	0	0	0	0	1	1	0	5
01001110001	9.329838804754381	9.442465149949939	9.428462036357367	9.400255330353895	0.025059552755060416	9.52928138679628	9.528478393926404	9.638123695834304	9.565294492185663	0.025749533579784652	0	1	0	0	1	1	1	0	0	0	1	5
01100101111	9.050800349614995	9.146499169408909	9.108580842898148	9.101960120640683	0.019674185709091106	9.328714492338603	9.295793280095037	9.2679514849635	9.29748641913238	0.012417634008179215	0	1	1	0	0	1	0	1	1	1	1	7
10000000111	9.253791994035726	9.267963753315136	9.24805481909381	9.256603522148223	0.0041836971927312755	8.427769536036896	9.097392087367027	8.999506986276254	8.841556203226725	0.14765383374181745	1	0	0	0	0	0	0	0	1	1	1	4
01011111110	9.399798932578516	9.44900736022773	9.459655763453528	9.436154018753257	0.013035952470600097	9.511794589189224	9.682822358616901	9.718201810693564	9.63760625283323	0.04506357997127617	0	1	0	1	1	1	1	1	1	1	0	8
11000100101	9.338453073072577	9.399430104731124	9.357677258953904	9.365186812252537	0.01272690483798396	9.951608830401426	9.935841779017174	9.973976514753364	9.953809041390654	0.007822991901174988	1	1	0	0	0	1	0	0	1	0	1	5
10001000011	8.426715494618305	8.547196831142768	8.334324095605503	8.436078807122191	0.043578385505438647						1	0	0	0	1	0	0	0	0	1	1	4
11001110011	9.385315488527496	9.418516179739296	9.462185410184556	9.422005692817116	0.015739434233959706	9.97853060635696	10.004516686966944	9.984794559344213	9.98928061755604	0.005536434398254733	1	1	0	0	1	1	1	0	0	1	1	7
00111111111	9.122812367013713	9.255024632525405	9.076486932270733	9.151441310603284	0.03782336119240752	8.971487502285514	9.220021394214347	9.121838240788259	9.104449045762706	0.051102938495176484	0	0	1	1	1	1	1	1	1	1	1	9
11001111110	9.437490764660707	9.438435235889608	9.444641435618395	9.440189145389569	0.0015858842269023162	10.099344905000217	10.074371941965754	10.097711199066948	10.090476015344308	0.005703407363226597	1	1	0	0	1	1	1	1	1	1	0	8
01000010101	8.899840475809375	9.178134104905523	9.115056962609236	9.06434384777471	0.05956886912227556	8.394365226842568	9.179783075472622	9.173651749747584	8.915933350687592	0.18440642574993596	0	1	0	0	0	0	1	0	1	0	1	4
01011001111	8.618047260631666	8.815304720192195	8.707466869301728	8.713606283375197	0.04032347463935149	8.596358240219022	9.095373617896074	9.15317004203742	8.948300633384173	0.12498846129476074	0	1	0	1	1	0	0	1	1	1	1	7
01000110001	9.360156010568721	9.512594163324119	9.42381749116693	9.43218922168659	0.03125676462194448	9.599560817561107	9.545103820217523	9.576906118115813	9.573856918631483	0.011168141840679456	0	1	0	0	0	1	1	0	0	0	1	4
11011100110	9.407490805861014	9.421785081031533	9.470131307100962	9.43313573133117	0.013401405682281	10.047814066794666	9.96717933842926	10.005077076474194	10.00669016056604	0.016469372508064108	1	1	0	1	1	1	0	0	1	1	0	7
00010000100	7.0	7.0	7.0	7.0	0.0	7.0	7.0	7.0	7.0	0.0	0	0	0	1	0	0	0	0	1	0	0	2
01101101000	7.9333714861935505	8.533282276043131	7.820925606298933	8.095859789511872	0.15634621985021538	8.231471556624232	8.869164924442115	8.74625790186021	8.61563146097552	0.13811870385854078	0	1	1	0	1	1	0	1	0	0	0	5
01010101000	8.236369020458767	8.657430358567725	8.356887328298294	8.416895569108261	0.0885286246893783	7.423481176067178			7.423481176067178	0.0	0	1	0	1	0	1	0	1	0	0	0	4
10011110011	9.257435030510608	9.32129056535969	9.361205791800062	9.313310462556785	0.021369192213741034	9.185958962882175	9.325825265913737	9.280182964839288	9.263989064545067	0.02911851497467881	1	0	0	1	1	1	1	0	0	1	1	7
01110101100	8.77028995990181	9.042492759793536	8.818435144709975	8.877072621468441	0.05930480071584068	8.952655347664399	9.198242224650008	9.317461658459996	9.156119743591468	0.07594036987111306	0	1	1	1	0	1	0	1	1	0	0	6
01000100000	7.952440261788807	8.578521077319115	7.9454931946242855	8.158818177910737	0.14839415883854568	8.646059323161486	9.052656949873564	9.348066999284288	9.015594424106446	0.14389458957052148	0	1	0	0	0	1	0	0	0	0	0	2
10001110001	9.183893407590688	9.219691308078497	9.20332608729657	9.202303600988584	0.007316152546720252	9.304192313634662	9.370618412653439	9.344349423823603	9.339720050037235	0.013657598519710133	1	0	0	0	1	1	1	0	0	0	1	5
00001110011	8.112693828217711	8.540945283064334	7.92896402923159	8.194201046837879	0.12820090598748443	8.748401692460426	9.103558108531443	9.27758946262035	9.043183087870739	0.11010887139670998	0	0	0	0	1	1	1	0	0	1	1	5
11010100011	9.38413191119151	9.452857729367091	9.416612099752793	9.417867246770465	0.014035615807074154	9.81662076432745	9.723381159824843	9.747813403918485	9.762605109356926	0.01973787338377596	1	1	0	1	0	1	0	0	0	1	1	6
01000101110	8.972266350263162	9.036373692398596	8.950554504890473	8.98639818251741	0.018216360541581305	9.292502729580814	9.238575018586413	9.278009361259873	9.269695703142366	0.011393617999747254	0	1	0	0	0	1	0	1	1	1	0	5
00100000111	8.289227531526128	8.600473292491825	8.542464647344541	8.477388490454166	0.06757053176310737	7.4316523157777565			7.4316523157777565	0.0	0	0	1	0	0	0	0	0	1	1	1	4
01010110001	9.484310943632789	9.513413810612867	9.504464502187703	9.500729752144453	0.006085577006732241	9.497500623589422	9.416027502193854	9.53965155030676	9.484393225363347	0.02565664057688314	0	1	0	1	0	1	1	0	0	0	1	5
00100011110	8.408760779564394	8.824615150739694	8.287458862353112	8.506944930885734	0.11501037287735605	7.0	7.0	7.0	7.0	0.0	0	0	1	0	0	0	1	1	1	1	0	5
01111111110	9.37945627567006	9.376586520039377	9.431338874453894	9.395793890054444	0.01258069494180702	9.4860406372312	9.619635333814172	9.569074915782094	9.558250295609156	0.02753714170652169	0	1	1	1	1	1	1	1	1	1	0	9
11101100000	9.280705248036366	9.354838463365144	9.28537540028234	9.30697303722795	0.01694981241278466	9.35658586957392	9.327571730134046	9.347704344243828	9.343953981317265	0.006069101916261398	1	1	1	0	1	1	0	0	0	0	0	5
01000101000	7.926569246023793	8.47084839330668	7.8231379049180845	8.07351851474952	0.14205502741098688	7.778278098263918	8.469297494564467		8.123787796414192	0.19948011723468723	0	1	0	0	0	1	0	1	0	0	0	3
01100110011	9.365725450940607	9.424888051367297	9.419118271542304	9.403243924616737	0.013316965933518946	9.449715173568908	9.449088741303736	9.524072306970833	9.474292073947826	0.017600434673677758	0	1	1	0	0	1	1	0	0	1	1	6
10101100011	8.359540651091057	8.681264326933494	8.371368151000041	8.470724376341531	0.07447625520367097	8.991504677102235	9.213541893969746	9.077629463696127	9.094225344922704	0.04570138377524337	1	0	1	0	1	1	0	0	0	1	1	6
00101000011	7.0	7.0	7.0	7.0	0.0	7.0	7.0	7.0	7.0	0.0	0	0	1	0	1	0	0	0	0	1	1	4
00111111101	9.112897482748053	9.262619968238386	9.135390650752566	9.170302700579668	0.03296044114464671	9.411052905934083	9.417080540443534	9.36393342527229	9.397355623883302	0.011880415357780746	0	0	1	1	1	1	1	1	1	0	1	8
01111100000	8.155575129321031	8.607178740891566	8.01584080775568	8.25953155932276	0.1261780106934799	8.611035872440388	9.051684560603936	9.382700849557258	9.01514042753386	0.1580444634027492	0	1	1	1	1	1	0	0	0	0	0	5
01011101100	8.805477745009007	8.93206034589632	8.862299319350004	8.86661247008511	0.025883524888098735	8.912088547330251	9.119352275116773	9.281970306446457	9.104470376297828	0.075684908354823	0	1	0	1	1	1	0	1	1	0	0	6
01011001101	8.340743746221474	8.420036850040196	8.471232157637479	8.410670917966383	0.02684087955332502						0	1	0	1	1	0	0	1	1	0	1	6
01001101111	9.079403556966339	9.213307698949171	9.090955443983377	9.127888899966296	0.030292022982327745	9.376666039797355	9.398958566884485	9.350561204858623	9.375395270513486	0.009889281265551997	0	1	0	0	1	1	0	1	1	1	1	7
10010100110	9.203674477368489	9.174086604392338	9.136833201672614	9.171531427811146	0.013673793241597825	9.146273082821406	9.253141258088306	9.263676120558378	9.221030153822696	0.026517951719338014	1	0	0	1	0	1	0	0	1	1	0	5
01100100011	8.531160931543276	8.962870898554051	8.606910129382445	8.700313986493258	0.09410684025483476	9.266595775062449	9.260087445421902	9.400074479999526	9.308919233494626	0.03225561659800351	0	1	1	0	0	1	0	0	0	1	1	5
01010011001	9.096207414894474	9.292010377883411	9.264476521239024	9.21756477133897	0.04327284423250853	8.194370413414987	8.824265070044609		8.509317741729799	0.18183492478310959	0	1	0	1	0	0	1	1	0	0	1	5
00111011011	8.80724701219878	9.106663735495584	8.681031384061589	8.864980710585316	0.08924741788407548	7.0	7.0	7.0	7.0	0.0	0	0	1	1	1	0	1	1	0	1	1	7
00011101010	7.0	7.0	7.0	7.0	0.0	7.0	7.0	7.0	7.0	0.0	0	0	0	1	1	1	0	1	0	1	0	5
00110011100	8.827971437473279	9.057241571045397	8.848073240086785	8.91109541620182	0.05183313700190595	7.0	7.0	7.0	7.0	0.0	0	0	1	1	0	0	1	1	1	0	0	5
00000011100	8.406289134335621	8.786133824883875	8.333452133172571	8.508625030797356	0.09923428110715406	7.0	7.0	7.0	7.0	0.0	0	0	0	0	0	0	1	1	1	0	0	3
11111100011	9.348880903629132	9.444065095196088	9.434859742979604	9.409268580601607	0.021432795256166308	9.871269216302103	9.802011493605963	9.834821585993042	9.836034098633704	0.014143671602767957	1	1	1	1	1	1	0	0	0	1	1	8
01110111001	9.44016391782728	9.431249290257568	9.369388433995738	9.413600547360195	0.015736903932531642	9.444036456019981	9.432801342001273	9.575439948668734	9.484092582229996	0.03237749466121783	0	1	1	1	0	1	1	1	0	0	1	7
11011100011	9.408685199204514	9.429332560570746	9.405477472555267	9.414498410776844	0.005285378851842839	9.866602969529156	9.758242471385387	9.783629195328464	9.80282487874767	0.023136749577022855	1	1	0	1	1	1	0	0	0	1	1	7
10110100111	9.3009716648274	9.269120929358788	9.255809879340756	9.275300824508982	0.009473999904439956	9.43874615808902	9.359860701300727	9.413621847198176	9.404076235529308	0.016452293911863293	1	0	1	1	0	1	0	0	1	1	1	7
10011100010	8.427935320701035	8.588191751536257	8.460729411717569	8.49228549465162	0.0345624330827963	8.413845513347265	9.155408020196342	9.106324163667	8.891859232403537	0.16930009989535036	1	0	0	1	1	1	0	0	0	1	0	5
00101011011	8.656893229228572	9.033874955137158	8.599747106512895	8.763505096959541	0.09629928607696335	7.0	7.0	7.0	7.0	0.0	0	0	1	0	1	0	1	1	0	1	1	6
10000011111	9.43370539698335	9.431304644659226	9.453522904268793	9.439510981970457	0.004978141852160686	8.416901802321137	9.133416497798681	9.085762289598474	8.878693529906098	0.16355754881143209	1	0	0	0	0	0	1	1	1	1	1	6
01110111100	9.367517292931652	9.395864065714424	9.425584199221454	9.39632185262251	0.011853962615633975	9.592021792152972	9.611159427314673	9.6767961809522	9.626659133473282	0.018151468798801116	0	1	1	1	0	1	1	1	1	0	0	7
00111000000	7.0	7.0	7.0	7.0	0.0	7.0	7.0	7.0	7.0	0.0	0	0	1	1	1	0	0	0	0	0	0	3
00111100111	8.097617346625212	8.539955185699691	8.304055406867821	8.313875979730907	0.09035856693177964	8.507268705924663	9.030452414246627	9.110516879774966	8.882745999982086	0.13375349118471502	0	0	1	1	1	1	0	0	1	1	1	7
01100100001	8.371299040726512	8.670732099576536	8.054716980408662	8.365582706903902	0.12575980022456257	8.96468128157887	9.191793841302731	9.323186030591943	9.159887051157847	0.07404384535445194	0	1	1	0	0	1	0	0	0	0	1	4
00001100010	7.0	7.0	7.0	7.0	0.0	7.1819636115236785			7.1819636115236785	0.0	0	0	0	0	1	1	0	0	0	1	0	3
11000110011	9.357465018220584	9.412449924775096	9.42125362771711	9.397056190237597	0.014112476587718092	10.091536662129677	10.039457825010054	10.083473538314239	10.071489341817989	0.011443826888899502	1	1	0	0	0	1	1	0	0	1	1	6
11001110000	9.343420549486154	9.36334424498626	9.408014749541096	9.371593181337836	0.013503927721121906	9.871417442927806	9.835484468579162	9.780270965228652	9.82905762557854	0.018743435884137086	1	1	0	0	1	1	1	0	0	0	0	5
10000000110	9.166171034952896	9.193335153659104	9.152216801292909	9.170574329968304	0.008536407134270936	8.372384011080971	9.142375862641805	9.19589074655356	8.903550206758778	0.18811304503460524	1	0	0	0	0	0	0	0	1	1	0	3
01111101001	8.404691229172245	8.765174986138891	8.609430941648746	8.593099052319962	0.07380964561625485	8.03735575378083	8.938610873287239	9.075248797283207	8.683738474783759	0.23022649973335843	0	1	1	1	1	1	0	1	0	0	1	7
11000100000	9.46698890936291	9.552563989963486	9.353635025142749	9.457729308156381	0.040737960229660704	9.594926165908698	9.453692183327114	9.592358631258024	9.546992326831278	0.03299074527290171	1	1	0	0	0	1	0	0	0	0	0	3
00100101111	7.0	7.0	7.0	7.0	0.0	8.032166552381037	8.949936646303312	8.83193743450989	8.604680211064746	0.20384220634701827	0	0	1	0	0	1	0	1	1	1	1	6
00100101110	7.0	7.0	7.0	7.0	0.0	7.633372080871107	8.092395599766611		7.862883840318859	0.1325086760993444	0	0	1	0	0	1	0	1	1	1	0	5
11000000110	9.401696438886534	9.445100908699617	9.462963077125721	9.43658680823729	0.012863175283827402	9.633155096091153	9.595806678893217	9.55379419090924	9.594251988631203	0.01620879963775459	1	1	0	0	0	0	0	0	1	1	0	4
10001110011	9.227595326294036	9.273648999089998	9.242982908928996	9.24807574477101	0.009571554446942038	9.385295287154863	9.353315614633454	9.325514468538415	9.354708456775578	0.01221264082510279	1	0	0	0	1	1	1	0	0	1	1	6
10001100000	7.900639276933941	8.234601639566643	7.621324785443702	7.918855233981429	0.12535017003651527	7.875111680661415	8.417809569291299		8.146460624976356	0.15666338604455252	1	0	0	0	1	1	0	0	0	0	0	3
11001011111	9.514515859122954	9.564152944737053	9.562610410606897	9.547093071488968	0.011522086956804421	9.839989227593742	9.671521564589217	9.622654353392763	9.711388381858574	0.04654860224428535	1	1	0	0	1	0	1	1	1	1	1	8
00001000010	7.0	7.0	7.0	7.0	0.0	7.0	7.0	7.0	7.0	0.0	0	0	0	0	1	0	0	0	0	1	0	2
00011001100	7.0	7.0	7.0	7.0	0.0	7.0	7.0	7.0	7.0	0.0	0	0	0	1	1	0	0	1	1	0	0	4
00101110010	7.994255285438043	8.398538845511602	7.806186988155192	8.066327039701612	0.12356909946150818	8.672678875761152	8.976582177191682	9.302115703176966	8.983792252043267	0.12850853980141128	0	0	1	0	1	1	1	0	0	1	0	5
00011110010	8.266289540308442	8.747819021683918	7.989834311240799	8.334647624411053	0.15659918372659748	8.282740733527831	8.802982698365588	8.684267484990077	8.589996972294498	0.11130148446709791	0	0	0	1	1	1	1	0	0	1	0	5
10011111111	9.353254391932037	9.384105922857492	9.425012065802663	9.387457460197396	0.014695325457076433	10.022758857195829	9.961986943330066	9.821851426368573	9.935532408964823	0.042063108800474855	1	0	0	1	1	1	1	1	1	1	1	9
01010101011	8.8095887543024	9.127901182698027	9.002115786580386	8.979868574526938	0.06544960446900303	8.516937201006387	9.060228589425568	9.12780463815732	8.90165680952976	0.13671656414966155	0	1	0	1	0	1	0	1	0	1	1	6
00010000110	8.442546501684243	8.759430823714368	8.513438180068274	8.571805168488961	0.06789568885442153						0	0	0	1	0	0	0	0	1	1	0	3
00000010100	8.627547129712053	8.889232261383482	8.591901384074244	8.702893591723258	0.06628125634191376	7.0	7.0	7.0	7.0	0.0	0	0	0	0	0	0	1	0	1	0	0	2
10001011100	9.333792854356533	9.4034926177871	9.41261908365865	9.38330151860076	0.01760281213926669	7.841377358941371	8.67066767538914		8.256022517165256	0.23939549371873461	1	0	0	0	1	0	1	1	1	0	0	5
11000111100	9.408005691117443	9.411340725557576	9.481137172555929	9.43349452974365	0.016857968809453585	10.121256712613896	10.035682265772047	10.050872688119732	10.069270555501893	0.01863959777476762	1	1	0	0	0	1	1	1	1	0	0	6
00011011011	8.705489358508782	8.928054020992795	8.592824135658008	8.742122505053194	0.06964344857283407	7.0		7.0	7.0	0.0	0	0	0	1	1	0	1	1	0	1	1	6
00000010111	8.505651491461135	8.990721133064866	8.404092958663274	8.633488527729758	0.1279908099773153	7.703659167999074			7.703659167999074	0.0	0	0	0	0	0	0	1	0	1	1	1	4
11101100111	9.334254137002294	9.417429086821466	9.400389790103368	9.38402433797571	0.017936875828222707	10.13096603987725	10.013811177120967	10.060888557806953	10.06855525826839	0.024067264035181894	1	1	1	0	1	1	0	0	1	1	1	8
01101110000	9.270838383973988	9.376454137686034	9.348975763800984	9.332089428487002	0.022370118083033106	9.411470255961406	9.377641611598085	9.512817847247746	9.433976571602413	0.028717167786020202	0	1	1	0	1	1	1	0	0	0	0	5
11110100000	9.404956658691717	9.457862139842726	9.29901274623534	9.387277181589928	0.03302197600412774	9.214214646369896	9.295131542554989	9.232912819363335	9.247419669429407	0.01729509827565253	1	1	1	1	0	1	0	0	0	0	0	5
11011110011	9.434687143065316	9.464083260082957	9.474177376165027	9.4576492597711	0.008375727804964202	10.003186437322821	9.922932014818297	9.875802344411	9.933973598850706	0.02629358038001054	1	1	0	1	1	1	1	0	0	1	1	8
01011001001	8.029311865912499	8.291246664432359	8.120082574299865	8.146880368214907	0.05430017033113979						0	1	0	1	1	0	0	1	0	0	1	5
11111111100	9.45993875750147	9.467688008653221	9.548492120405305	9.492039628853332	0.020021553282951444	10.14701193270934	9.99434309141064	10.075379928863036	10.072244984327673	0.031183100882266855	1	1	1	1	1	1	1	1	1	0	0	9
11001110001	9.372496698941754	9.400227939340477	9.411916630557867	9.394880422946699	0.008265689130788798	9.977336905837085	10.01118905929456	9.990076699185527	9.99286755477239	0.0069801352614301615	1	1	0	0	1	1	1	0	0	0	1	6
01110000111	9.293532710508495	9.41188181007622	9.34229200981482	9.349235510133179	0.024282320350500926	8.934500195399751	9.237363362284247	9.27731948017844	9.14972767928748	0.07653025023345923	0	1	1	1	0	0	0	0	1	1	1	6
00100100011	7.0	7.0	7.0	7.0	0.0	8.072758248037433	8.853515360866632	8.520197373646116	8.482156994183393	0.15993786301800555	0	0	1	0	0	1	0	0	0	1	1	4
01011100100	9.0241180419075	9.204673455906466	9.129198708570977	9.11933006879498	0.037020505397585265	9.252102668305644	9.2516639395387	9.356902081933422	9.286889563259257	0.024753325362659534	0	1	0	1	1	1	0	0	1	0	0	5
01011110000	9.357859899342047	9.476740182733787	9.399374169830683	9.411324750635506	0.02463142549334255	9.318213492120694	9.348939620073187	9.432355828475679	9.366502980223187	0.024112486225890392	0	1	0	1	1	1	1	0	0	0	0	5
00101100100	7.0	7.0	7.0	7.0	0.0	7.651725322880943			7.651725322880943	0.0	0	0	1	0	1	1	0	0	1	0	0	4
00010100001	7.0	7.0		7.0	0.0	7.384275426125232			7.384275426125232	0.0	0	0	0	1	0	1	0	0	0	0	1	3
00001001100	7.0	7.0	7.0	7.0	0.0	7.0	7.0	7.0	7.0	0.0	0	0	0	0	1	0	0	1	1	0	0	3
01100111110	9.327742550283812	9.340295588402931	9.356464413560332	9.341500850749025	0.0058782912839100195	9.6202028507469	9.609093229326717	9.67748272506266	9.635592935045425	0.014982889145015492	0	1	1	0	0	1	1	1	1	1	0	7
01001010110	9.260547976331793	9.36036197191664	9.329976302869968	9.316962083706132	0.020887539563043397	9.279663765743335	9.355454962490684	9.39056088784642	9.341893205360146	0.023139014186136623	0	1	0	0	1	0	1	0	1	1	0	5
11100100101	9.310475825856352	9.376922362127598	9.339828488312133	9.342408892098694	0.013593990145083425	9.981438509672811	9.932071187683384	9.926260088243298	9.946589928533164	0.012377802206373	1	1	1	0	0	1	0	0	1	0	1	6
10000111110	9.265654141842509	9.256805159588504	9.28000823896563	9.267489180132214	0.00478053775372629	9.979550071259554	9.947509880850744	9.867104164909069	9.931388039006455	0.023650073298282157	1	0	0	0	0	1	1	1	1	1	0	6
01111101011	8.610927971254716	9.011874561373707	8.72672158625404	8.783174706294155	0.08424147642710333	8.279183976582434	8.979670045077134	8.989618474589419	8.749490832082996	0.1662909831994104	0	1	1	1	1	1	0	1	0	1	1	8
00001010101	8.573742105268083	8.826764598821539	8.538560298787418	8.646355667625679	0.06418719591714378	7.0	7.0	7.0	7.0	0.0	0	0	0	0	1	0	1	0	1	0	1	4
00010011110	8.540192212032968	8.770668558432185	8.45709880548986	8.589319858651672	0.06632199451262596	7.0	7.0	7.0	7.0	0.0	0	0	0	1	0	0	1	1	1	1	0	5
11110100100	9.348217791825368	9.4410387966656	9.402647866540724	9.397301485010564	0.019041063439695798	9.883999861367148	9.860408474330367	9.878040016174301	9.87414945062394	0.005008172667518101	1	1	1	1	0	1	0	0	1	0	0	6
10100100011	8.38446295863774	8.837914622273164	8.304601638438669	8.508993073116525	0.11742834463385703	8.908979127450323	9.200654270859962	9.118756929988006	9.076130109432764	0.06141577117449156	1	0	1	0	0	1	0	0	0	1	1	5
01001001111	8.233239830784912	8.807463530620511	8.637668713923013	8.559457358442812	0.12043046157967317	8.445729856795742	9.176180290655331	9.058984521459443	8.893631556303506	0.1601539162783785	0	1	0	0	1	0	0	1	1	1	1	6
01100010100	8.796760445166635	9.076367769373338	8.986295352735791	8.953141189091921	0.058265860305301446	8.229093650758687	8.95815503827933	8.720997896605295	8.636082195214437	0.15181712351291124	0	1	1	0	0	0	1	0	1	0	0	4
10001100101	8.930423792192572	9.012334367765382	8.757151319882134	8.899969826613363	0.053190193326042724	9.261755270967901	9.28283048492838	9.19365019050252	9.246078648799601	0.019028919177690777	1	0	0	0	1	1	0	0	1	0	1	5
01010001010	7.5550233700447675	7.845431673090142		7.700227521567455	0.08383365596907479	7.0		7.0	7.0	0.0	0	1	0	1	0	0	0	1	0	1	0	4
10100100110	9.10533731810173	9.110745022794195	9.060820702430687	9.092301014442205	0.011184575321747468	9.308381109663099	9.278888236883208	9.282844956986072	9.29003810117746	0.006535331905895254	1	0	1	0	0	1	0	0	1	1	0	5
01110101111	9.285062370572776	9.358010344415826	9.277998117519694	9.307023610836099	0.01808411443158085	9.121915545620126	9.30392362086766	9.231206378494683	9.219015181660824	0.03740143451796434	0	1	1	1	0	1	0	1	1	1	1	8
00100111000	8.460955288927265	8.753750430368756	8.477292256018615	8.563999325104879	0.06716997789821894	9.140229492567773	9.283201024419037	9.357321789740547	9.260250768909119	0.04505053096970843	0	0	1	0	0	1	1	1	0	0	0	4
00010110000	8.209310356672757	8.527779176579887	8.048185874825375	8.26175846935934	0.09963728984441271	8.40316208880349	8.939407672161051	8.610027580267866	8.650865780410804	0.11040882389314761	0	0	0	1	0	1	1	0	0	0	0	3
00000000110	8.33794224786828	8.744569067918121	8.566724225733479	8.549745180506626	0.08321914711428392	7.137425850417863		7.0	7.068712925208931	0.03967142586618314	0	0	0	0	0	0	0	0	1	1	0	2
00000111010	8.17965693403068	8.745173925167832	7.950860840398046	8.291897233198853	0.16692400103397545	8.672302293972718	9.092664328855564	9.36529072042707	9.04341911441845	0.1425231315486705	0	0	0	0	0	1	1	1	0	1	0	4
01001101100	8.571815075030601	8.778544333278763	8.4995822879281	8.616647232079155	0.05910780745916176	9.071388825797307	9.223186069375835	9.277472541903933	9.190682479025691	0.04360807847619628	0	1	0	0	1	1	0	1	1	0	0	5
00111110011	8.219209906504144	8.608913853699018	7.888291982263308	8.238805247488823	0.1472593819530162	8.165175923057937	8.841830591193013	8.681841838104054	8.562949450785	0.1443762069496823	0	0	1	1	1	1	1	0	0	1	1	7
01000110000	9.3311914981611	9.47192979433116	9.265596327540589	9.356239206677616	0.043038578926160774	9.538740649054606	9.344467261422944	9.517282809826364	9.466830240101304	0.04348301129822054	0	1	0	0	0	1	1	0	0	0	0	3
00001011110	8.561289144189892	8.702194821608671	8.283267468483366	8.51558381142731	0.08702659065035553			7.0	7.0	0.0	0	0	0	0	1	0	1	1	1	1	0	5
11000111110	9.396471694400427	9.433635157562346	9.447043093758591	9.425716648573788	0.010695744455250525	10.164241130824774	10.068355222515423	10.091306798285796	10.107967717208664	0.020439816199406338	1	1	0	0	0	1	1	1	1	1	0	7
00101111000	8.530389131969823	8.731697864804767	8.487524783570125	8.583203926781572	0.05322464233974101	9.252139529961436	9.297223219068144	9.372489995230037	9.307284248086539	0.024822626946913805	0	0	1	0	1	1	1	1	0	0	0	5
01101101011	8.31746555795947	8.819378068854038	8.629219266219328	8.588687631010947	0.10344978833361755	8.701356493081597	9.029451923803908	9.077942452390658	8.936250289758721	0.0836352742853368	0	1	1	0	1	1	0	1	0	1	1	7
01100010101	8.839257953900248	9.176682073936085	8.920489177043699	8.978809734960011	0.07189659797496478	8.216431065520517	9.145714932476707	8.714888427247862	8.69234480841503	0.18985665092766818	0	1	1	0	0	0	1	0	1	0	1	5
00001011111	8.405584778933658	8.653337894162544	8.358161235390602	8.472361302828935	0.06471301141526604			7.0	7.0	0.0	0	0	0	0	1	0	1	1	1	1	1	6
11001011110	9.530569529806016	9.5090383867066	9.53484147020037	9.524816462237661	0.005646136131331352	9.622709277394735	9.672658888438354	9.573569121107349	9.622979095646812	0.020226839013404323	1	1	0	0	1	0	1	1	1	1	0	7
00011000011	7.0	7.0	7.0	7.0	0.0	7.0		7.0	7.0	0.0	0	0	0	1	1	0	0	0	0	1	1	4
01111111010	9.267138320365092	9.388051225119856	9.39466951226012	9.349953019248355	0.029310567475775647	8.923142367654748	9.221612145710266	9.373544449249582	9.172766320871533	0.0935458396806722	0	1	1	1	1	1	1	1	0	1	0	8
01101111101	9.31831268470144	9.329206717928816	9.346627388928608	9.331382263852953	0.005830671329544619	9.919398575914153	9.853840646004496	9.951577428106157	9.908272216674936	0.020334562311234965	0	1	1	0	1	1	1	1	1	0	1	8
01110100001	8.388906227197465	8.933490843834688	8.404447090618326	8.57561472055016	0.12656807741411913	8.894879581677467	9.200540649332408	9.293650143053627	9.129690124687833	0.08516585562582493	0	1	1	1	0	1	0	0	0	0	1	5
11110100101	9.3944526374	9.424484082503797	9.441847168501656	9.42026129613515	0.009788891136750102	9.960193611070787	9.912050072572084	9.941881135279543	9.938041606307472	0.009920572579573857	1	1	1	1	0	1	0	0	1	0	1	7
00011010100	8.821435857966046	8.95484394864547	8.848888702368498	8.875056169660004	0.028760452949091443	7.0		7.0	7.0	0.0	0	0	0	1	1	0	1	0	1	0	0	4
11100100011	9.383599392367005	9.348845175722813	9.400190438093432	9.377545002061083	0.010697162579077168	9.891071282202944	9.886142204204832	9.79959364835452	9.858935711587431	0.021004699093425328	1	1	1	0	0	1	0	0	0	1	1	6
00011110000	8.140812464850171	8.525498058525034	7.9167494478158895	8.194353323730365	0.12569386449975734	8.462286059430491	9.160134824684668	9.347421323268296	8.989947402461151	0.19043324632471575	0	0	0	1	1	1	1	0	0	0	0	4
00010010101	8.781503429635839	9.001580936704931	8.73835169049645	8.840478685612407	0.0576353040360933	7.0	7.0	7.0	7.0	0.0	0	0	0	1	0	0	1	0	1	0	1	4
00000010101	8.60212889863059	8.89462133080884	8.583903957869188	8.69355139576954	0.07118623017476844	7.0	7.0	7.0	7.0	0.0	0	0	0	0	0	0	1	0	1	0	1	3
10111110001	9.283418274545484	9.282453216774085	9.305348813858869	9.290406768392813	0.005286482386833379	9.302458821410859	9.267356735743725	9.318204382634546	9.296006646596377	0.010626960356101244	1	0	1	1	1	1	1	0	0	0	1	7
01101100100	8.767462642315033	8.955126390674318	8.935525894669697	8.886038309219684	0.042113312319895846	9.20173177319556	9.241817800348537	9.37156855452677	9.271706042690289	0.03624250116908263	0	1	1	0	1	1	0	0	1	0	0	5
01000111000	9.316441797122797	9.402047713563741	9.368088917958179	9.362192809548239	0.017598135806621597	9.307263000810327	9.337576629541893	9.497633079546675	9.380824236632966	0.0417591474187567	0	1	0	0	0	1	1	1	0	0	0	4
00110100100	7.0	7.0		7.0	0.0						0	0	1	1	0	1	0	0	1	0	0	4
00101101011	7.0	7.0	7.0	7.0	0.0	7.315490105145893			7.315490105145893	0.0	0	0	1	0	1	1	0	1	0	1	1	6
00010000111	8.680385579502486	8.874272511348961	8.661175273073296	8.738611121308248	0.048123571024862234	7.478472727425085			7.478472727425085	0.0	0	0	0	1	0	0	0	0	1	1	1	4
10111100111	9.299188476093613	9.270687945457858	9.249665415467078	9.273180612339516	0.010147195216676591	9.375575727491244	9.364514321693717	9.377867386065653	9.372652478416871	0.002915050625443191	1	0	1	1	1	1	0	0	1	1	1	8
01010011000	8.771634383811914	9.086039280053226	8.979529068774578	8.94573424421324	0.06528039179886035						0	1	0	1	0	0	1	1	0	0	0	4
10100111111	9.278479700894225	9.277653097271855	9.361320144304662	9.30581764749025	0.01962382133557187	10.024096049666902	10.006973575029043	10.054074385232484	10.02838133664281	0.009733056592565964	1	0	1	0	0	1	1	1	1	1	1	8
10011101101	9.266842294965905	9.243803690011676	9.214488425068302	9.241711470015295	0.010712259034230587	9.244995851416238	9.232448390327562	9.149614504800343	9.209019582181382	0.02115845815479111	1	0	0	1	1	1	0	1	1	0	1	7
00000101100	7.0	7.0	7.0	7.0	0.0	7.610808456730126			7.610808456730126	0.0	0	0	0	0	0	1	0	1	1	0	0	3
11010011100	9.564914394000636	9.566320282255626	9.567428478952275	9.566221051736179	0.000514383256597294	9.274213032555624	9.288306501856493	9.269116523812523	9.277212019408212	0.0040581041537996795	1	1	0	1	0	0	1	1	1	0	0	6
11001000100	9.386286337162726	9.467688827530141	9.459261245535203	9.437745470076024	0.018274699289416642	9.1403403640669	9.293563470396231	9.183298889483236	9.205734241315456	0.03226669809875972	1	1	0	0	1	0	0	0	1	0	0	4
10010011101	9.466194357837377	9.46424951952697	9.489015788232912	9.473153221865752	0.00562229724442186	8.194274207657143	9.10608304023159	8.728752368340192	8.67636987207631	0.18704134178763837	1	0	0	1	0	0	1	1	1	0	1	6
00001101011	7.0	7.0	7.0	7.0	0.0	7.197690362813392		7.0	7.098845181406697	0.05706829209325343	0	0	0	0	1	1	0	1	0	1	1	5
01101111100	9.28328048743374	9.338890871743182	9.399262952930886	9.340478104035936	0.023681471503627094	9.790108704061023	9.743692056649657	9.80636619150724	9.780055650739307	0.0132778619379126	0	1	1	0	1	1	1	1	1	0	0	7
01001101110	8.995775823516956	9.169383549004454	9.133756826721065	9.099638733080825	0.037434261985665754	9.313029004737922	9.373098959895076	9.318517205253995	9.334881723295664	0.013558195345729137	0	1	0	0	1	1	0	1	1	1	0	6
01011101111	9.315360822786703	9.386908894288428	9.485338285908828	9.395869334327987	0.034840832382505876	9.440404444484852	9.369607964827273	9.36199138538168	9.3906679315646	0.017653109304559808	0	1	0	1	1	1	0	1	1	1	1	8
01001001100	7.611096770852843	7.7891614546915955		7.700129112772219	0.051402846573734756	7.345696599561523		7.0	7.172848299780762	0.09979401240739189	0	1	0	0	1	0	0	1	1	0	0	4
11000100011	9.369938719790369	9.395230783529714	9.30657601609061	9.35724850647023	0.018644472295220087	9.835181729915698	9.860287025722457	9.798670517028585	9.83137975755558	0.012649043318737735	1	1	0	0	0	1	0	0	0	1	1	5
01111110001	9.43590419767446	9.416404251920794	9.45770473793026	9.436671062508506	0.008434785093190138	9.429810230688645	9.508527160783128	9.53910675207792	9.49248138118323	0.023020037211001765	0	1	1	1	1	1	1	0	0	0	1	7
00101111101	8.930027647150256	9.049603596217766	8.878295125729203	8.952642123032408	0.035870621463000164	9.515980162323325	9.533605789931872	9.486710758281237	9.512098903512145	0.009670264783069465	0	0	1	0	1	1	1	1	1	0	1	7
10111100001	8.377443130137848	8.563379087311956	8.109813371859671	8.35021186310316	0.09308295671664046	8.517684141783624	9.001937889347172	9.070680163046422	8.86343406472574	0.12304378079853978	1	0	1	1	1	1	0	0	0	0	1	6
01100111100	9.291602052724599	9.354864561975939	9.355112775776512	9.333859796825683	0.014940454616617416	9.664106685801098	9.7164627670598	9.714578749864351	9.698382734241749	0.012124513754701175	0	1	1	0	0	1	1	1	1	0	0	6
00011111010	8.321451453829656	8.749495504809238	8.301348970545162	8.457431976394686	0.1033415501553138	8.803683803559721	9.08227673775721	9.155362199063008	9.013774246793313	0.07576154138384421	0	0	0	1	1	1	1	1	0	1	0	6
01010101111	9.209353350053822	9.347277472954346	9.324392743088996	9.293674522032388	0.0301757981063513	9.262144663120369	9.266696392485565	9.325862906250707	9.28490132061888	0.014511881242385559	0	1	0	1	0	1	0	1	1	1	1	7
11111100110	9.433584293338502	9.458144700243801	9.462617481425896	9.451448825002734	0.0063817129565981	10.009745685521347	9.952814011046831	10.010987109834872	9.991182268801017	0.013567594271524762	1	1	1	1	1	1	0	0	1	1	0	8
11010100000	9.32781625216752	9.433393777251707	9.338097486702859	9.36643583870736	0.023766047548529953	9.22402294764251	9.303195859149556	9.324426576449378	9.283881794413814	0.02160245739053441	1	1	0	1	0	1	0	0	0	0	0	4
01110001110	8.363295987013462	8.433580143412641	8.506222067464849	8.434366065963651	0.02917598719835436	7.959041004167348	8.748683866272147		8.353862435219748	0.22795025949993608	0	1	1	1	0	0	0	1	1	1	0	6
01011111000	9.374372894782935	9.395701467144253	9.342178327982612	9.370750896636599	0.011000157266740385	9.195904509204306	9.214767201726891	9.447966685169341	9.286212798700179	0.05731810379104958	0	1	0	1	1	1	1	1	0	0	0	6
11011101000	9.349815019684288	9.390171867503566	9.367356834969403	9.36911457405242	0.00826121486717782	9.192429007344783	9.199645580188983	9.178082742413473	9.190052443315746	0.004480978979183943	1	1	0	1	1	1	0	1	0	0	0	6
10110111100	9.324831848107653	9.28167854723485	9.300534192685728	9.30234819600941	0.00883194769099095	9.922847775183598	9.901241284590476	9.812716102169851	9.878935053981309	0.023823735689411887	1	0	1	1	0	1	1	1	1	0	0	7
01011010101	9.211159464357197	9.449071810402543	9.31391845089649	9.324716575218742	0.04871348327526877	8.794023959192645	9.273080255711257	9.260125327538297	9.109076514147398	0.11141928455809826	0	1	0	1	1	0	1	0	1	0	1	6
00110100101	7.0	7.0	7.0	7.0	0.0	7.391756597866642			7.391756597866642	0.0	0	0	1	1	0	1	0	0	1	0	1	5
01101000100	8.181919482968057	8.575564787819314	8.229842455566729	8.3291089087847	0.08768269314096558	8.355735927250793	8.928130950091061	8.919862509072374	8.734576462138076	0.13395098913065306	0	1	1	0	1	0	0	0	1	0	0	4
10011111110	9.336667588339152	9.34095404154346	9.35857535529365	9.345398995058753	0.004740003024752899	9.953048277304722	9.978636330588447	9.823187038754789	9.918290548882652	0.0340274285116513	1	0	0	1	1	1	1	1	1	1	0	8
00100010100	8.721943593863324	8.903589670275045	8.681063378627416	8.768865547588595	0.04835759148375555	7.0	7.0	7.0	7.0	0.0	0	0	1	0	0	0	1	0	1	0	0	3
00010101010	7.0	7.0	7.0	7.0	0.0	7.0	7.0	7.0	7.0	0.0	0	0	0	1	0	1	0	1	0	1	0	4
01111011101	9.25137054278591	9.39504215413577	9.232218357670344	9.292877018197341	0.03633177626555784	8.117735985796736	9.06286186785249	8.822731677147349	8.667776510265524	0.20055093328148463	0	1	1	1	1	0	1	1	1	0	1	8
01111011001	9.070987340914256	9.329555064135109	9.165178759952695	9.188573721667353	0.053424105121387955	7.809086450552094	8.652330652585338		8.230708551568716	0.24342363351824226	0	1	1	1	1	0	1	1	0	0	1	7
01111001111	8.51126357937443	8.745563949146309	8.628502340613249	8.62844328971133	0.047826367264070406	8.394615427288953	9.10094486117756	8.970762689269359	8.82210765924529	0.15345957978022667	0	1	1	1	1	0	0	1	1	1	1	8
11111100010	9.333520396169195	9.379939937092091	9.402427802734326	9.371962711998538	0.014345642544154808	9.818557009407362	9.67042384920121	9.759232835079343	9.749404564562639	0.030436558237798825	1	1	1	1	1	1	0	0	0	1	0	7
00010011111	8.671066175205338	8.935128285034274	8.603917193980278	8.736703884739965	0.07148010025408996	7.0		7.0	7.0	0.0	0	0	0	1	0	0	1	1	1	1	1	6
01111101010	8.370079960250255	8.718956114244845	8.689583290698032	8.592873121731044	0.07899713633283566	7.899195757370743	8.613838412504206	8.653034613388193	8.388689594421047	0.17324705284824096	0	1	1	1	1	1	0	1	0	1	0	7
00100100001	7.0	7.0	7.0	7.0	0.0	8.116031447942907	8.711518858325272	8.452526741711862	8.42669234932668	0.1218960457749467	0	0	1	0	0	1	0	0	0	0	1	3
00011111011	8.614223295766205	8.975365076829734	8.650556730723197	8.746715034439712	0.0811794935494411	8.86559489581413	9.116467688512467	9.291954432674089	9.091339005666896	0.08748257130616041	0	0	0	1	1	1	1	1	0	1	1	7
10011011010	9.40357098530877	9.427200014777918	9.445480771972258	9.425417257352983	0.00857798755120633	8.533669120475093	9.141489208757424	9.14553088121996	8.940229736817493	0.1437432519283412	1	0	0	1	1	0	1	1	0	1	0	6
11011100111	9.439463534799634	9.499526185374613	9.493571103255805	9.477520274476683	0.013509887286079927	10.085612805845207	9.976264834520466	10.011911615029897	10.024596418465189	0.02276665283132737	1	1	0	1	1	1	0	0	1	1	1	8
10100111011	9.221619092160966	9.256294597983556	9.261693490086897	9.246535726743806	0.008878025476675403	9.750593764909457	9.757783777870436	9.633302371012759	9.71389330459755	0.028530971486106175	1	0	1	0	0	1	1	1	0	1	1	7
10101110011	9.235845482713472	9.207254386657599	9.224436221865489	9.222512030412187	0.00587565000632214	9.43311742495669	9.395197896096814	9.349158686250094	9.392491335767865	0.017164699982382778	1	0	1	0	1	1	1	0	0	1	1	7
11001111101	9.463820467351383	9.445064643251412	9.480900188459485	9.463261766354094	0.007317566594540836	10.169747279256097	10.072158809755578	10.08949320455778	10.110466431189819	0.021255526816111227	1	1	0	0	1	1	1	1	1	0	1	8
01111000111	9.331579603820623	9.454002548146883	9.338778608560293	9.374786920175934	0.028045478552505942	9.164434706504595	9.159164776290904	9.224675422732435	9.182758301842645	0.014858930024743087	0	1	1	1	1	0	0	0	1	1	1	7
01100100010	8.429854816222898	8.73445510573785	8.528685007830642	8.564331643263797	0.06344071518148026	9.05982550334242	9.270608108486844	9.442000531952496	9.257478047927252	0.07814914905806933	0	1	1	0	0	1	0	0	0	1	0	4
00001011001	8.890290756531211	9.046686123744225	8.838129947873483	8.925035609382974	0.04430824457371501			7.0	7.0	0.0	0	0	0	0	1	0	1	1	0	0	1	4
11011111100	9.478628975994447	9.472296537528749	9.509819110114332	9.486914874545842	0.008200385656206585	10.107258579922831	10.008071972588873	10.072395467241636	10.06257533991778	0.020541916269333223	1	1	0	1	1	1	1	1	1	0	0	8
11001011011	9.481710156963807	9.512418038650019	9.519656926692793	9.504595040768873	0.008224848581204827	9.913262539135363	9.785124070087921	9.837064534482556	9.84515038123528	0.02631191903788409	1	1	0	0	1	0	1	1	0	1	1	7
10000111111	9.297507718495293	9.313453379067896	9.317230751638276	9.309397283067156	0.004273726811679681	10.036144415099026	10.06775389315359	9.981427994150364	10.028442100800994	0.017830378776300355	1	0	0	0	0	1	1	1	1	1	1	7
01000010100	8.98182296088264	9.244625393911846	9.029119359091993	9.08518923796216	0.057189965886951355	8.283645241394131	9.226292618023171	9.055945939818896	8.855294599745399	0.20507792802223998	0	1	0	0	0	0	1	0	1	0	0	3
10001110000	9.111401105870485	9.14273807656311	9.070869622422245	9.10833626828528	0.014710050969870488	9.117118484257718	9.278544326510293	9.333996693720106	9.243219834829372	0.04599801484718199	1	0	0	0	1	1	1	0	0	0	0	4
11000010101	9.518235959373223	9.54810286351904	9.59095336488368	9.552430729258647	0.0149220367378702	9.37239164685474	9.39093578100463	9.391518071516195	9.384948499791856	0.004441108764021465	1	1	0	0	0	0	1	0	1	0	1	5
01110101110	9.115616365800065	9.173164570326891	9.157062517498721	9.148614484541893	0.012120752910436322	9.002928665310941	9.209375542130806	9.213546280760816	9.141950162734188	0.0491588942859975	0	1	1	1	0	1	0	1	1	1	0	7
11001101001	9.334578175482548	9.371029897943883	9.38327807545499	9.362962049627141	0.01034196706529554	9.298177384170703	9.36390525921876	9.39640751629626	9.352830053228574	0.02042989988205562	1	1	0	0	1	1	0	1	0	0	1	6
11001100111	9.409078499943037	9.417696879641452	9.405198465298696	9.410657948294395	0.0026116273053328446	10.157168694756386	9.991866779313154	10.040274695748524	10.063103389939355	0.03469400229421074	1	1	0	0	1	1	0	0	1	1	1	7
01000001100	7.386913260813575	7.5084518032173655		7.44768253201547	0.035085155086871586	7.201253681137687		7.0	7.100626840568843	0.05809693349012337	0	1	0	0	0	0	0	1	1	0	0	3
11000011101	9.518768091239448	9.594611077063936	9.556763587731297	9.55671425201156	0.015481394479628983	9.648463977697126	9.54324002732022	9.53514095292492	9.575614985980755	0.025809011498196012	1	1	0	0	0	0	1	1	1	0	1	6
10010111011	9.277453300822957	9.324825745842046	9.326761301387242	9.309680116017416	0.011400747833661639	9.470530150295694	9.446355234944331	9.40722788847819	9.441371091239406	0.013041123124923563	1	0	0	1	0	1	1	1	0	1	1	7
00011011111	8.800352304827602	8.935916496189389	8.697160482925451	8.81114309464748	0.04888496586566778			7.0	7.0	0.0	0	0	0	1	1	0	1	1	1	1	1	7
11001000001	9.373707350148678	9.457881303100717	9.302837455230572	9.378142036159987	0.031687007118084795	8.912574544077232	9.356700135762855	9.146242417432024	9.138505699090704	0.09069801348940508	1	1	0	0	1	0	0	0	0	0	1	4
01001101011	8.604575130054066	8.853686878437916	8.593214440350714	8.683825482947565	0.06009982886287471	8.958939185711127	9.090420938343973	9.117038188901658	9.055466104318919	0.03455720865161887	0	1	0	0	1	1	0	1	0	1	1	6
00101000100	7.0	7.0	7.0	7.0	0.0	7.0	7.0	7.0	7.0	0.0	0	0	1	0	1	0	0	0	1	0	0	3
00001100101	7.0	7.0	7.0	7.0	0.0	7.6875362027073395	8.021105455087861		7.854320828897601	0.09629314882763819	0	0	0	0	1	1	0	0	1	0	1	4
11001100001	9.450025628563337	9.53658979948234	9.392028913847886	9.459548113964521	0.02969980558302299	9.594770058529233	9.453483897653989	9.527016124725344	9.525090026969522	0.028847955453665804	1	1	0	0	1	1	0	0	0	0	1	5
10101110000	9.16498376061506	9.168596437660037	9.113170723620746	9.14891697396528	0.012659704243046549	9.222507094249426	9.302482803104574	9.346643141359316	9.290544346237771	0.025688306718192295	1	0	1	0	1	1	1	0	0	0	0	5
01110110011	9.378293632596773	9.457854487873462	9.448728871865336	9.428292330778524	0.017775083599354823	9.322238990846662	9.301338173847638	9.445843587585976	9.356473584093425	0.031883797298420474	0	1	1	1	0	1	1	0	0	1	1	7
01111110011	9.360519624884539	9.411907321879383	9.420528788390037	9.397651911717986	0.013245675176635574	9.334397974324608	9.327624260196249	9.371265999865797	9.344429411462217	0.009588384106394152	0	1	1	1	1	1	1	0	0	1	1	8
00001100110	7.954007208357752	8.667240312567609	8.034774426580885	8.218673982502082	0.159446778077732	8.284487059966532	9.014339920840717	8.996948324125114	8.765258434977454	0.17001541752710714	0	0	0	0	1	1	0	0	1	1	0	4
11100111011	9.38954519653249	9.422916836444069	9.470680543577581	9.427714192184714	0.016648308730962052	10.074198379610428	10.014739982067583	10.074774016825883	10.054570792834632	0.014082808398429354	1	1	1	0	0	1	1	1	0	1	1	8
01000010110	9.277696382621944	9.393328846427238	9.340908058892188	9.337311095980455	0.023637612252728188	9.201158035845706	9.29204728327928	9.434490104652317	9.309231807925768	0.04801465835014619	0	1	0	0	0	0	1	0	1	1	0	4
00111010111	8.923768260661717	9.111236783709362	8.85569437889398	8.963566474421688	0.05402685062165886	7.8959075443311155	8.836459777311862	8.315727678655216	8.349365000099398	0.19235740510255112	0	0	1	1	1	0	1	0	1	1	1	7
01001000110	9.195461218876003	9.289894985004636	9.267279409885612	9.250878537922084	0.020129478786025758	9.266718929410382	9.336900700722818	9.428144118943068	9.34392124969209	0.03304413471603381	0	1	0	0	1	0	0	0	1	1	0	4
10010100011	8.757602388537821	8.944182757544645	8.684637691298827	8.795474279127097	0.054645250519054285	8.60024648109655	9.050074025725486	9.196516800191837	8.948945769004624	0.12685606449111886	1	0	0	1	0	1	0	0	0	1	1	5
11101100011	9.379429801071089	9.412989786197619	9.384419783257698	9.392279790175468	0.0073925968822845245	9.845657621051402	9.866083864836028	9.815380203297957	9.842373896395129	0.010414752829964105	1	1	1	0	1	1	0	0	0	1	1	7
01100101011	8.389120473639053	8.798044762365347	8.783490819501461	8.656885351835287	0.09471578257239233	8.649065655957825	9.100926447344786	9.217780896964802	8.989257666755805	0.1226184418953627	0	1	1	0	0	1	0	1	0	1	1	6
11010011101	9.597223852526582	9.584686229758736	9.61723715312608	9.599715745137134	0.006702584073867365	9.463776516860944	9.540972697840909	9.460868281843457	9.488539165515103	0.018547555732271008	1	1	0	1	0	0	1	1	1	0	1	7
10001100110	9.05154094570057	9.073848349730996	9.054503720905453	9.059964338779006	0.00494585397605743	9.305433052452551	9.29085296778252	9.306228694981957	9.300838238405676	0.003534060078292861	1	0	0	0	1	1	0	0	1	1	0	5
10101100111	9.234206831039556	9.164981771754276	9.12160251234696	9.173597038380263	0.023186203733159706	9.443363835263156	9.457452269635347	9.41809317613474	9.43963642701108	0.008141506202843327	1	0	1	0	1	1	0	0	1	1	1	7
11000100001	9.393964344206896	9.490017020533656	9.325041640837958	9.40300766852617	0.03382690069183767	9.516516624926846	9.4969534739026	9.605833849942279	9.539767982923907	0.023696706199266494	1	1	0	0	0	1	0	0	0	0	1	4
01010101001	8.488890253688801	8.912090667487131	8.642118686369956	8.681033202515296	0.0874741887976952	8.249891689187335	9.049753800599683	9.04060373166508	8.780083073817366	0.18746026654214368	0	1	0	1	0	1	0	1	0	0	1	5
00111110001	8.335638471426888	8.71470379589423	8.04539873592123	8.365247001080784	0.13702178330321824	8.85761048712782	8.973090995939748	9.19312615707284	9.007942546713469	0.0695864739468859	0	0	1	1	1	1	1	0	0	0	1	6
00111011000	9.022538155154695	9.232973143338699	9.146642714691993	9.134051337728463	0.04318492820297898	7.0	7.0	7.0	7.0	0.0	0	0	1	1	1	0	1	1	0	0	0	5
11110111100	9.44248138467832	9.465421792992883	9.491640042777359	9.466514406816186	0.010041901963354194	10.088529026919872	10.018069501507263	10.064283837551805	10.056960788659646	0.01461367204680964	1	1	1	1	0	1	1	1	1	0	0	8
11101110001	9.401168414924381	9.436611107269046	9.42016412252256	9.419314548238663	0.007240941956535969	9.993142454842518	10.014358464723925	9.991526345513897	9.99967575502678	0.005201593111385642	1	1	1	0	1	1	1	0	0	0	1	7
00111100001	7.0	7.0	7.0	7.0	0.0	7.426385617488864			7.426385617488864	0.0	0	0	1	1	1	1	0	0	0	0	1	5
00110010110	8.780863764640173	9.136077175983088	8.996900925563773	8.971280622062345	0.07307124589866226	7.440725640183772	8.190489564474076		7.8156076023289245	0.2164382017588385	0	0	1	1	0	0	1	0	1	1	0	5
00100011111	8.423378645039541	8.789297759289896	8.420922252748369	8.544532885692602	0.08653890355989854	7.0		7.0	7.0	0.0	0	0	1	0	0	0	1	1	1	1	1	6
11000111111	9.44976435952016	9.446355311290127	9.48356964980702	9.45989644020577	0.008398621336041334	10.167055945556113	10.06560462674963	10.132302701740263	10.121654424682001	0.02104808730473213	1	1	0	0	0	1	1	1	1	1	1	8
01100011110	9.039350348171633	9.341352349201687	9.185191404975695	9.188631367449672	0.061657896443340195	8.410646137463866	9.206998448079608	8.815940537208482	8.811195040917319	0.16256339299744207	0	1	1	0	0	0	1	1	1	1	0	6
11101110010	9.33861646537122	9.393878065754118	9.427375111845167	9.386623214323501	0.018298447033068106	9.978772711810981	9.935751502819393	9.882240612937776	9.932254942522718	0.019743273025884685	1	1	1	0	1	1	1	0	0	1	0	7
11000011100	9.511546069818998	9.535052759967929	9.524236025214515	9.523611618333815	0.0048033587797839325	9.295522029814444	9.421269175280164	9.355650528697586	9.357480577930732	0.02567618208359983	1	1	0	0	0	0	1	1	1	0	0	5
11111111111	9.496529295300014	9.471790395465458	9.55164313423602	9.506654275000498	0.01668832617301335	10.092869132914938	10.060928776076276	10.13043535560753	10.094744421532916	0.014203454275188121	1	1	1	1	1	1	1	1	1	1	1	11
01000101001	8.360489264797426	8.716388352572615	8.185917124380664	8.420931580583568	0.1103705019000873	8.591979293857305	9.002094719552659	9.313493156860924	8.969189056756962	0.14773718252898693	0	1	0	0	0	1	0	1	0	0	1	4
00001000011	7.0	7.0	7.0	7.0	0.0	7.0	7.0	7.0	7.0	0.0	0	0	0	0	1	0	0	0	0	1	1	3
11010000100	9.460701605489923	9.534651623713067	9.464206538957557	9.486519922720182	0.01703215889625898	8.887824124709761	9.180092573770184	9.104421974670664	9.057446224383536	0.06192771648640747	1	1	0	1	0	0	0	0	1	0	0	4
00001011011	8.497548640437744	8.921736131314008	8.524524444945657	8.647936405565803	0.09695930492742516	7.0		7.0	7.0	0.0	0	0	0	0	1	0	1	1	0	1	1	5
01110011111	9.376243605995187	9.507558595667467	9.46304033174308	9.448947511135245	0.0272637192457645	8.333092780117983	9.065183290205736	9.062874391807599	8.820383487377105	0.17228392640675802	0	1	1	1	0	0	1	1	1	1	1	8
11001100000	9.321495584442037	9.383579106177702	9.301995882197618	9.335690190939118	0.017392866109181157	9.378212272450961	9.278746683720453	9.354598735869269	9.337185897346894	0.021216173250735607	1	1	0	0	1	1	0	0	0	0	0	4
01110100010	8.586546726748935	8.897758589818544	8.782961626009966	8.755755647525815	0.0642499414756858	9.099265361548458	9.18925279060559	9.333328681109736	9.207282277754594	0.048201324663943466	0	1	1	1	0	1	0	0	0	1	0	5
11011011011	9.520222881427678	9.537470734129533	9.588532029067869	9.548741881541694	0.014501804403948809	9.81374187762227	9.875553023328816	9.807826840994002	9.832373913981696	0.015313792952685687	1	1	0	1	1	0	1	1	0	1	1	8
01010011011	9.115303073610598	9.428197680039656	9.299181868765881	9.280894207472045	0.06419577815790972	7.974244842184786	8.642533378562165		8.308389110373476	0.1929182831869105	0	1	0	1	0	0	1	1	0	1	1	6
00011000000	7.0	7.0	7.0	7.0	0.0	7.0	7.0	7.0	7.0	0.0	0	0	0	1	1	0	0	0	0	0	0	2
11011100010	9.396172565827676	9.428655701670476	9.36275539245706	9.39586121998507	0.01345229466659379	9.596891435305519	9.588501594806845	9.679937965037633	9.621776998383332	0.020634198504425844	1	1	0	1	1	1	0	0	0	1	0	6
11001101000	9.332479128625772	9.400008774713653	9.291679790610834	9.341389231316754	0.022335825656927884	9.294837615136645	9.253327841946774	9.266426002627176	9.2715304865702	0.008663208939841134	1	1	0	0	1	1	0	1	0	0	0	5
10101110001	9.233545217365627	9.21391619265	9.150734366385144	9.19939859213359	0.017665785215086792	9.418389913957975	9.429867008671676	9.399323443225073	9.415860121951575	0.006298508199625086	1	0	1	0	1	1	1	0	0	0	1	6
10010110011	9.287817625242484	9.31083709460486	9.295677419540086	9.298110713129143	0.0047769355710409085	9.171071019658713	9.279360791654087	9.175437635024037	9.208623148778946	0.02502541182506762	1	0	0	1	0	1	1	0	0	1	1	6
00011011000	8.738827362813726	8.928592011615256	8.69019215916559	8.78587051119819	0.05142699642769947	7.0	7.0	7.0	7.0	0.0	0	0	0	1	1	0	1	1	0	0	0	4
01101000001	7.428444759731027	7.772757960322565	7.484801919078162	7.5620015463772505	0.07539643212904247	7.273533444505537			7.273533444505537	0.0	0	1	1	0	1	0	0	0	0	0	1	4
01111010100	9.105181742653901	9.249792877989453	9.312681674600904	9.222552098414752	0.043436928400806644	8.282354730700947	9.085654379087057	9.071992178099253	8.813333762629085	0.18775015010844653	0	1	1	1	1	0	1	0	1	0	0	6
01010001011	8.145235125726597	8.645570726383896	8.464634688196204	8.418480180102234	0.10342598584198798	7.523174607105227			7.523174607105227	0.0	0	1	0	1	0	0	0	1	0	1	1	5
01001111010	9.269524950482742	9.340151267244202	9.302244846690185	9.303973688139044	0.014429488466268224	9.275529770329843	9.347362217877897	9.409998983401298	9.344296990536346	0.02746979865842251	0	1	0	0	1	1	1	1	0	1	0	6
10110111110	9.333304552815656	9.346580214857235	9.383419906099324	9.354434891257405	0.010599993040093847	10.033830160597784	9.992022033611311	9.891806285595711	9.972552826601602	0.029796484087448043	1	0	1	1	0	1	1	1	1	1	0	8
01110000101	8.44184570928447	8.93140087790337	8.679712394218912	8.684319660468917	0.09994330555961349	8.012184950306768	8.947615342532963	8.749589774037386	8.56979668895904	0.20124680939773323	0	1	1	1	0	0	0	0	1	0	1	5
00010101110	7.0	7.0	7.0	7.0	0.0	7.2680059097895775		7.0	7.134002954894789	0.07736664208071158	0	0	0	1	0	1	0	1	1	1	0	5
10000011101	9.441950073483241	9.400760307446944	9.4528935940915	9.431867991673895	0.011222790608835723	8.384004246904198	9.254142661936513	9.042903537106692	8.893683481982467	0.185285897991543	1	0	0	0	0	0	1	1	1	0	1	5
01101010111	9.236198988033022	9.363618609996164	9.257673883280821	9.285830493770002	0.027849404694376967	9.226694176765056	9.32556780276445	9.380001220439707	9.310754399989738	0.0317289039793628	0	1	1	0	1	0	1	0	1	1	1	7
01111000101	8.457943108796307	8.78831823954889	8.719481622516685	8.65524765695396	0.07115878196432891	8.469332138853689	9.008994097588634	8.956759065607075	8.811695100683131	0.12151229215323607	0	1	1	1	1	0	0	0	1	0	1	6
11100010110	9.517289699438617	9.544528157335114	9.588190156727249	9.550002671166993	0.014601349465065763	9.618754616119144	9.599468132867127	9.533171424987854	9.583798057991375	0.018327047798324773	1	1	1	0	0	0	1	0	1	1	0	6
01001000100	8.492012485061942	8.625390005477753	8.418119264354692	8.511840584964796	0.04288580804637649	8.74123090323858	9.392497213011392	9.290487746200556	9.14140528748351	0.14300707219348385	0	1	0	0	1	0	0	0	1	0	0	3
00011000010	7.0	7.0	7.0	7.0	0.0	7.0	7.0	7.0	7.0	0.0	0	0	0	1	1	0	0	0	0	1	0	3
10001100100	8.736225689370007	8.939437455901516	8.719567063551718	8.798410069607746	0.04997652818603498	9.120646520562383	9.237631302828577	9.326140969578343	9.228139597656435	0.04208040219706284	1	0	0	0	1	1	0	0	1	0	0	4
00111011101	8.929685078172692	9.097002708254909	8.880852920349762	8.969180235592454	0.046278294583906254	7.0	7.0	7.0	7.0	0.0	0	0	1	1	1	0	1	1	1	0	1	7
10100100101	8.936230733087406	9.047668889015199	8.894204632913969	8.959368085005524	0.032376231676733584	9.31105469418588	9.356899346394293	9.289832866495262	9.31926230235848	0.013994057104404246	1	0	1	0	0	1	0	0	1	0	1	5
01101010110	9.277420190992173	9.4431931081231	9.25563931735865	9.32541753882464	0.0418766346083789	9.277098787994582	9.38973348300128	9.427945701614453	9.364925990870105	0.03201628904828217	0	1	1	0	1	0	1	0	1	1	0	6
01000000011	8.2885520030419	8.779005896365236	8.258191156473991	8.441916351960375	0.11934017622004418	8.54054078287122	9.15931212115314	9.204679517760882	8.968177473928414	0.15147574328502264	0	1	0	0	0	0	0	0	0	1	1	3
11011110010	9.382641752622495	9.393722344529817	9.402183244922252	9.392849114024854	0.00400082031091667	9.894152435082177	9.805151489290784	9.847443435895102	9.848915786756022	0.01817469830439112	1	1	0	1	1	1	1	0	0	1	0	7
11010111111	9.523623785924112	9.529223180164575	9.523453159113519	9.525433375067403	0.0013403510350552188	10.14372791112082	10.098672230282991	10.138805467876491	10.127068536426767	0.010089765968806352	1	1	0	1	0	1	1	1	1	1	1	9
11000000111	9.431454271116353	9.478449277073883	9.488959783639816	9.466287777276683	0.012500983632195315	9.662115404841428	9.63773704832665	9.510426053589354	9.603426168919144	0.033254929847833826	1	1	0	0	0	0	0	0	1	1	1	5
01110001111	8.50048371597526	9.007705694087543	8.771029682876772	8.759739697646525	0.10361316807795919	8.471660497748347	9.068336407023263	8.743516991963537	8.761171298911718	0.12195579191700803	0	1	1	1	0	0	0	1	1	1	1	7
01000000010	8.294415417450706	8.879722169393956	8.396185600514558	8.523441062453074	0.12766588092391662	8.348901196493198	9.147784873256711	9.147016344570652	8.881234138106853	0.1882081818113349	0	1	0	0	0	0	0	0	0	1	0	2
11101110000	9.324572425361756	9.326837144047564	9.407120504095797	9.35284335783504	0.019195436490392848	9.919927679011417	9.870815225458042	9.848082826853595	9.879608577107685	0.014991180575705929	1	1	1	0	1	1	1	0	0	0	0	6
10110111000	9.257837213010333	9.254351048545496	9.302717239811496	9.271635167122442	0.011012188456847245	9.297778860834944	9.358023997185331	9.376812410067418	9.344205089362562	0.016856240862714388	1	0	1	1	0	1	1	1	0	0	0	6
00101000101	7.0	7.0	7.0	7.0	0.0	7.0	7.0	7.0	7.0	0.0	0	0	1	0	1	0	0	0	1	0	1	4
10011100011	8.767717467972659	8.933085019271909	8.670455415936551	8.790419301060373	0.05420656026745993	8.721198468292174	9.183293505847406	9.04369789939298	8.982729957844187	0.0967563721896526	1	0	0	1	1	1	0	0	0	1	1	6
10000110000	9.119437798327288	9.223891540825825	9.05468886451518	9.132672734556097	0.03485388326142613	9.03713863749588	9.265571326976866	9.262218839460413	9.188309601311053	0.053451387600858394	1	0	0	0	0	1	1	0	0	0	0	3
00101000111	8.407499542388647	8.671262405493975	8.555336185414253	8.544699377765625	0.05397154844004288	7.367500585899246			7.367500585899246	0.0	0	0	1	0	1	0	0	0	1	1	1	5
00011000111	8.87961246118343	9.09691316111075	8.94086146202442	8.972462361439534	0.04574177736691922	7.677892386706829			7.677892386706829	0.0	0	0	0	1	1	0	0	0	1	1	1	5
11100100111	9.352377158417292	9.387489321306257	9.417501903668278	9.385789461130608	0.013307111222099752	10.033301622676564	9.973884961580367	10.013522835083348	10.006903139780093	0.012352126526675718	1	1	1	0	0	1	0	0	1	1	1	7
01110010111	9.388113861052231	9.57328824948562	9.442627960521175	9.468010023686341	0.03884922860840835	9.149130750510599	9.264588372470767	9.373506547075444	9.262408556685603	0.045807001318339355	0	1	1	1	0	0	1	0	1	1	1	7
00100001111	7.103983083601613	7.394577783343536	7.0	7.166186955648382	0.08349141477848959	7.0	7.0	7.0	7.0	0.0	0	0	1	0	0	0	0	1	1	1	1	5
00011011001	8.972020093674741	9.195957071279462	9.0021726982074	9.056716621053868	0.049612199649372926			7.0	7.0	0.0	0	0	0	1	1	0	1	1	0	0	1	5
10101110010	9.2380771655904	9.178172982018976	9.22368188667674	9.213310678095372	0.012765835120341063	9.23433690826975	9.315149370919864	9.392956800655655	9.314147693281756	0.03238008668841873	1	0	1	0	1	1	1	0	0	1	0	6
10010101101	9.143803748549557	9.193625688172439	9.168247620025307	9.168559018915767	0.010170456757182107	9.215697271543018	9.288872250984808	9.24705571001666	9.250541744181495	0.014987543326183614	1	0	0	1	0	1	0	1	1	0	1	6
11100011111	9.527313379447985	9.567612398506023	9.570355465114813	9.55509374768961	0.00983779064234068	9.709969776875862	9.668279375911881	9.53773251069303	9.638660554493592	0.03668418120069024	1	1	1	0	0	0	1	1	1	1	1	8
10001111110	9.263167398641633	9.257959705018699	9.28905236907168	9.270059824244004	0.006798499681192478	9.991675665029288	9.966518819733443	9.867512012534672	9.9419021657658	0.0267975057596253	1	0	0	0	1	1	1	1	1	1	0	7
01111000011	8.526189382504231	8.846518498926262	8.519800659505941	8.630836180312144	0.07626636531204116	8.335695550888559	9.021589171472336	9.033643190684515	8.796975971015137	0.1631058165419542	0	1	1	1	1	0	0	0	0	1	1	6
00111011010	8.69617140535567	9.023831637433362	8.619412974745742	8.779805339178258	0.08768750371583886	7.0	7.0	7.0	7.0	0.0	0	0	1	1	1	0	1	1	0	1	0	6
00101000010	7.0	7.0	7.0	7.0	0.0	7.0	7.0	7.0	7.0	0.0	0	0	1	0	1	0	0	0	0	1	0	3
11100111111	9.412041950364793	9.442456576835957	9.475692667615654	9.443397064938802	0.012996902451744292	10.11205216669576	10.037974942449717	10.1134317245875	10.087819611244326	0.017625001420460185	1	1	1	0	0	1	1	1	1	1	1	9
11101110011	9.383854794756976	9.397568522173607	9.470001718337707	9.417141678422764	0.0188973298147803	10.01122522086153	9.991937703241224	9.995516100210814	9.99955967477119	0.004188574845286224	1	1	1	0	1	1	1	0	0	1	1	8
10111100000	8.24268265067799	8.35342756262763	8.120346018357996	8.238818743887872	0.047597179365906045	7.723333229810053	8.269370428505617		7.996351829157835	0.15762736182721657	1	0	1	1	1	1	0	0	0	0	0	5
10001101011	8.4863083730841	8.701899448276166	8.36580995117473	8.518005924178333	0.06951329438136572	8.950040988472251	9.204795130921744	9.054288522198089	9.069708213864027	0.05228646007348769	1	0	0	0	1	1	0	1	0	1	1	6
01110111011	9.389491119926175	9.441398829053488	9.423045587724443	9.417978512234702	0.010745999311569325	9.233799787816267	9.426899483782123	9.45939142885267	9.37336356681702	0.04978699283003076	0	1	1	1	0	1	1	1	0	1	1	8
01011111001	9.382214764941669	9.464069727094904	9.485437214664096	9.44390723556689	0.02224340007034927	9.371630661742836	9.332594069466788	9.5673061776065	9.423843636272041	0.0513437588851485	0	1	0	1	1	1	1	1	0	0	1	7
00101111100	8.856815112145394	9.045472359000673	8.827640243528842	8.909975904891636	0.04827397512599298	9.442823170493334	9.45487123263563	9.465980239782901	9.454558214303956	0.004728212309767627	0	0	1	0	1	1	1	1	1	0	0	6
10101111111	9.308188480158547	9.31863325366218	9.379726856544684	9.33551619678847	0.015775562063126407	10.0759568988574	10.047858260156834	10.046170498017927	10.056661885677388	0.006830511028613241	1	0	1	0	1	1	1	1	1	1	1	9
01100111010	9.308536080956667	9.358199906237424	9.347263874070203	9.337999953754766	0.010653552225177181	9.368028139723764	9.298047571549684	9.442443307440437	9.369506339571295	0.02947928917604667	0	1	1	0	0	1	1	1	0	1	0	6
01011101110	9.138623487730714	9.174392532009778	9.230076250428716	9.18103075672307	0.01881467278386039	9.273524764583373	9.177259237534015	9.339554186083669	9.263446062733685	0.03331940814404042	0	1	0	1	1	1	0	1	1	1	0	7
00011010111	8.77690573681816	9.065125230630608	8.821463334195114	8.887831433881294	0.06333924881848807	7.640627515510387	8.687362803712666		8.163995159611527	0.3021664502069334	0	0	0	1	1	0	1	0	1	1	1	6
11101100110	9.381511000426409	9.385935106614275	9.369748974719123	9.379065027253269	0.003415279515271641	10.073829575711596	9.941237445998349	10.020593607408395	10.01188687637278	0.027239749110043055	1	1	1	0	1	1	0	0	1	1	0	7
11000110010	9.327170853650925	9.383950643460269	9.391005961577283	9.367375819562826	0.014287371121704527	9.964890562520274	9.899076140679881	9.913900785600157	9.925955829600104	0.014094192627502075	1	1	0	0	0	1	1	0	0	1	0	5
01110000011	8.482207601933823	9.030320925589354	8.650107714212565	8.720878747245246	0.1146468913879796	8.661717863365189	8.942967891907106	9.266098010905756	8.95692792205935	0.12346727131557181	0	1	1	1	0	0	0	0	0	1	1	5
00110100001	7.0	7.0	7.0	7.0	0.0						0	0	1	1	0	1	0	0	0	0	1	4
00110010111	8.822871979425218	9.008041998684336	8.81350755835842	8.881473845489325	0.044789407504966926	7.5354966532699			7.5354966532699	0.0	0	0	1	1	0	0	1	0	1	1	1	6
00001001101	7.0	7.0	7.0	7.0	0.0	7.0	7.0	7.0	7.0	0.0	0	0	0	0	1	0	0	1	1	0	1	4
00100111001	8.777812970475905	8.958909158173293	8.738328269808154	8.825016799485784	0.0480193245525243	9.360405683380208	9.43146504450818	9.4904193804565	9.427430036114963	0.026577250065960043	0	0	1	0	0	1	1	1	0	0	1	5
01101011001	8.784384796129956	9.1750922125408	8.799702979903243	8.919726662857999	0.09033948441123554	8.096604200317941	8.960125018971247	8.70446875673642	8.587065992008535	0.18108681524627546	0	1	1	0	1	0	1	1	0	0	1	6
01101011101	8.906102677290372	9.146218107876596	9.048472542297418	9.033597775821463	0.049294690399824995	8.276740473042688	9.253943999538887	9.115206581885566	8.88196368482238	0.21584460838837	0	1	1	0	1	0	1	1	1	0	1	7
01001010101	8.988147298502248	9.15453808740198	9.07484286117414	9.07250941569279	0.03397439571091135	8.866651859330142	9.154606502045329	9.338777756137217	9.120012039170897	0.09714533635670927	0	1	0	0	1	0	1	0	1	0	1	5
11111100111	9.436200765746614	9.463904320450633	9.497614492539384	9.465906526245544	0.012555995119716898	10.124725564729852	9.97462184379703	10.027395151483995	10.042247520003626	0.031086509393014404	1	1	1	1	1	1	0	0	1	1	1	9
11111100101	9.32790489089163	9.427904986769724	9.450138353198227	9.401982743619861	0.026580778908530195	10.0253979667298	9.930033781314004	9.885971562378492	9.947134436807431	0.029095403048455138	1	1	1	1	1	1	0	0	1	0	1	8
10101100001	8.174382108051057	8.555389145636589	7.948598824581566	8.22612335942307	0.1252041607746263	8.92363866869677	9.188207778439336	9.178499390175956	9.096781945770687	0.061247461168592844	1	0	1	0	1	1	0	0	0	0	1	5
01110100000	8.16853049036482	8.798167570897792	8.042030732101518	8.336242931121376	0.1653437463965083	8.629111130725189	9.156641760839452	9.293779575558206	9.026510822374282	0.14326349921767398	0	1	1	1	0	1	0	0	0	0	0	4
10001101001	8.18389622730403	8.375025338815469	8.057887053056902	8.205602873058801	0.06518890105674038	8.703054267311693	9.01983530990863	9.073862239179867	8.932250605466729	0.08178014055928506	1	0	0	0	1	1	0	1	0	0	1	5
00101111111	8.991029053864896	9.135302298027256	8.99086346538223	9.03906493909146	0.034025061342313576	9.268420344677256	9.312449191426357	9.328821244971325	9.303230260358312	0.012752834368690373	0	0	1	0	1	1	1	1	1	1	1	8
01101111010	9.30071803447765	9.342989372242359	9.315647385187331	9.319784930635782	0.008751723267048582	9.17608529598866	9.291585360223305	9.424648971291916	9.297439875834627	0.05078005134047557	0	1	1	0	1	1	1	1	0	1	0	7
01101110010	9.37009004136455	9.382727821670148	9.341860026691084	9.364892629908594	0.00854209167392652	9.361895167130564	9.384464727348623	9.48553485073542	9.410631581738203	0.026880045392946677	0	1	1	0	1	1	1	0	0	1	0	6
00001010111	8.530380890372317	8.8352776977204	8.424379133099647	8.596679240397455	0.08708808855969777	7.521771120648567	8.264122159484753		7.8929466400666595	0.21429828605263515	0	0	0	0	1	0	1	0	1	1	1	5
10000101111	9.14498269093752	9.132519735422262	9.152160577262489	9.143221001207424	0.004057263652534069	9.70114746910093	9.592157930556596	9.498292810514561	9.597199403390697	0.041445879296179135	1	0	0	0	0	1	0	1	1	1	1	6
00001110010	7.942013530006112	8.284646939258016	7.753475436942719	7.993378635402283	0.109935262584579	8.43266023054534	9.041307269442628	9.04914598920062	8.84103782972953	0.1443921506514135	0	0	0	0	1	1	1	0	0	1	0	4
11000011011	9.514767045969213	9.547291911289653	9.546783588838547	9.536280848699137	0.007606985592808287	9.89008376639235	9.869940379165834	9.855492399706293	9.871838848421492	0.007092763935146771	1	1	0	0	0	0	1	1	0	1	1	6
10101011100	9.3470087019306	9.337703824811348	9.515800011676925	9.400170846139623	0.0409251819924491	8.276065448385445	9.199968268832588	8.878578398475389	8.78487070523114	0.19147887361160545	1	0	1	0	1	0	1	1	1	0	0	6
01101011110	9.132959456718806	9.293522180594094	9.263853356999594	9.230111664770831	0.03487829654768214	8.82431489064432	9.132576572590061	9.363071020326867	9.106654161187082	0.1103543688738981	0	1	1	0	1	0	1	1	1	1	0	7
11100011100	9.550335519685936	9.515831867512155	9.562544931315939	9.542904106171344	0.009890626982171472	9.291019095666515	9.401572014797887	9.311635596481096	9.3347422356485	0.023999738062203763	1	1	1	0	0	0	1	1	1	0	0	6
01110001100	7.819190964124536	7.745207354836132		7.782199159480333	0.021357228369140033			7.0	7.0	0.0	0	1	1	1	0	0	0	1	1	0	0	5
10110100000	8.192506450051535	8.478651271037691	8.106796936038641	8.259318219042623	0.0794950427921821	7.613954427405312			7.613954427405312	0.0	1	0	1	1	0	1	0	0	0	0	0	4
10001011001	9.408033103790896	9.46068604464555	9.419747443296602	9.429488863911017	0.011286086580764966	8.485928922826966	9.0980974766607	9.156226267545847	8.913417555677837	0.15160509968059152	1	0	0	0	1	0	1	1	0	0	1	5
10100101101	9.083426839000568	9.109698504617963	9.062067083203981	9.085064142274172	0.009739940519893648	9.373559608887762	9.439718713094368	9.364568378247306	9.392615566743146	0.0167543046918597	1	0	1	0	0	1	0	1	1	0	1	6
01100011101	8.989565383636346	9.175969327977054	8.927231108533206	9.030921940048868	0.052836933139851	7.9429607672480405	8.940061636474548		8.441511201861294	0.2878382276285669	0	1	1	0	0	0	1	1	1	0	1	6
01001001000	7.0		7.0	7.0	0.0	7.0		7.0	7.0	0.0	0	1	0	0	1	0	0	1	0	0	0	3
00111000111	8.828571342876383	9.031727909784918	8.900999430622488	8.920432894427929	0.04203449437886997	7.6258334872523745	8.71221379423996		8.169023640746166	0.3136109813407952	0	0	1	1	1	0	0	0	1	1	1	6
10001000101	8.60118747530791	8.742303422716128	8.392139791312069	8.578543563112035	0.07192380489004832			7.0	7.0	0.0	1	0	0	0	1	0	0	0	1	0	1	4
00001000111	8.401040928963683	8.77551512441857	8.740845829200598	8.639133960860951	0.08447554763189626	7.466207204259758			7.466207204259758	0.0	0	0	0	0	1	0	0	0	1	1	1	4
11000000100	9.462722066976688	9.483344086882672	9.497708132769922	9.481258095543096	0.007179481409123723	9.030799842526068	9.233474395229406	9.213812192627207	9.159362143460895	0.045630489567530276	1	1	0	0	0	0	0	0	1	0	0	3
11000111000	9.346731138201172	9.388401546006364	9.357207544486947	9.364113409564828	0.008849425132159446	10.071224605389974	9.956355780597988	9.977647780510337	10.0017427221661	0.02494706524930646	1	1	0	0	0	1	1	1	0	0	0	5
11000001011	9.425794160199015	9.440158321616792	9.414530216030641	9.426827565948816	0.005244058456426569	9.162454050490846	9.29942299187526	9.053215675923967	9.171697572763357	0.05036300334403326	1	1	0	0	0	0	0	1	0	1	1	5
11101011011	9.510982957607162	9.501562415645347	9.53357793632066	9.51537443652439	0.006717045560092815	9.777628647661057	9.850042538816043	9.764466995835763	9.797379394104288	0.01881206340751864	1	1	1	0	1	0	1	1	0	1	1	8
10010111010	9.282302345002316	9.253989177596543	9.332604021785698	9.289631848128186	0.016255074304020747	9.235951549825009	9.340015287973156	9.314626288937244	9.296864375578469	0.022150732019375032	1	0	0	1	0	1	1	1	0	1	0	6
01000011010	8.622159465608808	9.050875465143292	8.78372326234414	8.818919397698748	0.08839157955949746	7.464594856071418			7.464594856071418	0.0	0	1	0	0	0	0	1	1	0	1	0	4
00110011101	8.946490128253442	9.070316085531141	8.81856586069501	8.945124024826532	0.05139056918214736	7.0	7.0	7.0	7.0	0.0	0	0	1	1	0	0	1	1	1	0	1	6
11110111011	9.500206219995198	9.506062184165227	9.518236897717305	9.508168433959243	0.0037550754747345807	10.035081786936221	10.032715083670132	10.113223374432067	10.060340081679472	0.018703307685874002	1	1	1	1	0	1	1	1	0	1	1	9
00111010100	8.918602112447713	9.101098569068462	8.947042378343044	8.988914353286406	0.0400857120930168	7.0	7.0	7.0	7.0	0.0	0	0	1	1	1	0	1	0	1	0	0	5
00101101101	7.0	7.0	7.0	7.0	0.0	8.266816321223345	8.955256149745072	8.846658599831812	8.689577023600076	0.15110333967594333	0	0	1	0	1	1	0	1	1	0	1	6
00011101011	7.0	7.0	7.0	7.0	0.0		7.0	7.0	7.0	0.0	0	0	0	1	1	1	0	1	0	1	1	6
00101110000	8.065220494452701	8.475976174076019	7.86953086640888	8.136909178312534	0.126358239635727	8.879761816563935	9.133523378774427	9.375612029878011	9.129632408405458	0.10122434921887861	0	0	1	0	1	1	1	0	0	0	0	4
11000011110	9.494676029292496	9.561274930258113	9.592958544436387	9.549636501328997	0.02047947332780576	9.479812863466881	9.576070382016148	9.498754275412534	9.518212506965188	0.020818039255587728	1	1	0	0	0	0	1	1	1	1	0	6
00101010111	8.676032230475451	8.875812710447748	8.588059354348536	8.713301431757245	0.060197236245704874	7.650880910369077	8.814266254404473		8.232573582386774	0.33584042077505055	0	0	1	0	1	0	1	0	1	1	1	6
00000000101	7.0	7.0	7.0	7.0	0.0	7.0	7.0	7.0	7.0	0.0	0	0	0	0	0	0	0	0	1	0	1	2
11001101011	9.377610277389987	9.385951943529896	9.3645002720267	9.376020830982194	0.004414716062645895	9.854960480075764	9.812357431151892	9.74624849754302	9.804522136256892	0.022362981580872448	1	1	0	0	1	1	0	1	0	1	1	7
10000100000	7.830388898789809	8.084143853836954	7.588955946067815	7.834496232898192	0.10109023909796538	7.739495806451617	8.381446112613327		8.060470959532472	0.18531509103441293	1	0	0	0	0	1	0	0	0	0	0	2
11111110001	9.452818897583867	9.44696349489031	9.516417715237793	9.472066702570658	0.015725937590629718	10.011412335400287	9.93827786830532	9.950659949585946	9.966783384430519	0.01597986458383675	1	1	1	1	1	1	1	0	0	0	1	8
01101011111	9.19717460256948	9.41751362668762	9.270485779434924	9.29505800289734	0.045807872343351874	8.667731974945687	9.020360051007096	9.1479781239728	8.94535671664186	0.10155311913662929	0	1	1	0	1	0	1	1	1	1	1	8
01100000110	9.157466359886307	9.313648533330412	9.288570792895957	9.253228562037558	0.034241842792523465	9.182353211760002	9.2241951810667	9.316629614418405	9.241059335748368	0.028050067921979012	0	1	1	0	0	0	0	0	1	1	0	4
01001001101	7.769415199295508	7.98727401712992		7.878344608212714	0.06289042356101579	7.480187217877443			7.480187217877443	0.0	0	1	0	0	1	0	0	1	1	0	1	5
00000110011	8.248166405490126	8.595455973239021	7.880693570171322	8.241438649633489	0.14591965268252252	8.711926627750266	9.099895977251844	9.260616291577907	9.024146298860005	0.11515829477301573	0	0	0	0	0	1	1	0	0	1	1	4
10011011011	9.491309934150207	9.460927913415343	9.517431782052464	9.489889876539337	0.011544726180193613	8.72505325096908	9.106817247425411	9.146660697330926	8.992843731908472	0.09502690968563138	1	0	0	1	1	0	1	1	0	1	1	7
00011000100	7.0			7.0	0.0	7.0	7.0	7.0	7.0	0.0	0	0	0	1	1	0	0	0	1	0	0	3
00111111110	9.058442200015175	9.134011346897706	9.029513414854767	9.073988987255882	0.02202737461827725	9.076269241490698	9.291935209566693	9.247465280825342	9.20522324396091	0.0464869958615329	0	0	1	1	1	1	1	1	1	1	0	8
11010000101	9.472373895392128	9.57872320701666	9.511898661098547	9.520998587835779	0.0219455786007121	9.12843620686477	9.306214872010656	9.260497982730572	9.231716353868665	0.03768863680479326	1	1	0	1	0	0	0	0	1	0	1	5
10000001110	8.772722139766575	9.00182576772717	8.82106017665782	8.865202694717189	0.04930101336288264	7.414094531496298		7.0	7.207047265748149	0.11953879461466983	1	0	0	0	0	0	0	1	1	1	0	4
11101100100	9.307698922265523	9.354092549722344	9.324637728444179	9.32880973347735	0.009584243898609192	9.909524384404024	9.871999858294943	9.914507604039606	9.898677282246192	0.009486585537748187	1	1	1	0	1	1	0	0	1	0	0	6
01111101000	8.273805531542658	8.71574478735363	8.304340752980599	8.431297023958962	0.10076043991586987	7.706416475928483	8.129596865925787		7.918006670927135	0.12216165604035718	0	1	1	1	1	1	0	1	0	0	0	6
01101011000	8.72258017025087	9.07095616322723	8.763782347728574	8.852439560402225	0.0777137205173169	7.677570931675818			7.677570931675818	0.0	0	1	1	0	1	0	1	1	0	0	0	5
01011000110	9.297938977648592	9.407160167232188	9.325982044918877	9.34369372993322	0.023157413870614	9.17743241632344	9.300025123016503	9.368955782699283	9.282137774013075	0.039602752235507015	0	1	0	1	1	0	0	0	1	1	0	5
00010000011	7.0	7.0	7.0	7.0	0.0	7.0	7.0	7.0	7.0	0.0	0	0	0	1	0	0	0	0	0	1	1	3
00000001101	7.0	7.0	7.0	7.0	0.0	7.0	7.0	7.0	7.0	0.0	0	0	0	0	0	0	0	1	1	0	1	3
11010111000	9.432639409839505	9.445553837047127	9.461424586455736	9.446539277780788	0.005886069971927888	9.943677317780027	9.912875791613589	9.949047743910123	9.935200284434579	0.007968663668714734	1	1	0	1	0	1	1	1	0	0	0	6
11001100011	9.420042164583675	9.4137109064215	9.45025594530641	9.428003005437196	0.007973040063198312	9.783210146616273	9.799078781343074	9.803426466347387	9.795238464768913	0.0043442667085481	1	1	0	0	1	1	0	0	0	1	1	6
01001101001	8.262206109401763	8.81198707429418	8.395472920566435	8.489888701420794	0.11708297064849835	8.639733728447622	8.943696020630432	9.196553597474335	8.926661115517463	0.11381983763085654	0	1	0	0	1	1	0	1	0	0	1	5
00110011110	8.590805371971936	8.813212213742926	8.591199850555173	8.665072478756677	0.05237536748428746	7.0	7.0	7.0	7.0	0.0	0	0	1	1	0	0	1	1	1	1	0	6
00110000100	7.0	7.0	7.0	7.0	0.0	7.0	7.0	7.0	7.0	0.0	0	0	1	1	0	0	0	0	1	0	0	3
00010101011	7.0	7.0	7.0	7.0	0.0	7.0	7.0	7.0	7.0	0.0	0	0	0	1	0	1	0	1	0	1	1	5
10111110000	9.260743435300613	9.218802847606037	9.225781865053854	9.235109382653501	0.00917428618903949	9.117412634289904	9.221139057342132	9.26458166792732	9.201044453186451	0.030869418395808392	1	0	1	1	1	1	1	0	0	0	0	6
11110111101	9.492905935990944	9.480313850160275	9.59364410578475	9.522287963978656	0.025358806446939972	10.181100203069796	10.0576215924496	10.113937175898991	10.117552990472795	0.0252373645165511	1	1	1	1	0	1	1	1	1	0	1	9
11110011100	9.543542214255066	9.537972011926843	9.568968045118098	9.550160757100002	0.006745891965251012	9.246835078807377	9.385471372533953	9.370883196543245	9.334396549294858	0.03110054140775117	1	1	1	1	0	0	1	1	1	0	0	7
01101101001	8.153564333180867	8.680352988661436	8.118291056213879	8.317402792685394	0.12852411225543312	8.67305939129179	9.040322967968233	9.145373060189536	8.952918473149852	0.10124204474324106	0	1	1	0	1	1	0	1	0	0	1	6
10101100100	8.877548732849851	8.978177852352124	8.872564887108558	8.909430490770177	0.02432714352649588	9.154906045757444	9.241819412080456	9.326311125729623	9.24101219452251	0.034989079392020304	1	0	1	0	1	1	0	0	1	0	0	5
01010001101	8.119993492272371	8.363570245297327	8.236872599761176	8.240145445776959	0.04973335951908485						0	1	0	1	0	0	0	1	1	0	1	5
00100111011	8.415754394564118	8.953955792905099	8.424382539793774	8.598030909087663	0.12585077367850322	9.187934792473985	9.29968110505344	9.286481397539573	9.258032431689001	0.02492929112928402	0	0	1	0	0	1	1	1	0	1	1	6
00100010110	8.597152233736438	8.957623199945038	8.800894370259234	8.785223267980237	0.0737891330694202	7.543541604010928			7.543541604010928	0.0	0	0	1	0	0	0	1	0	1	1	0	4
01110010101	9.199022406841172	9.369331446513863	9.281465453655077	9.283273102336704	0.03477006122100768	8.065795136073849	8.995581720208062	8.897552984591526	8.65297661362448	0.20856213060522674	0	1	1	1	0	0	1	0	1	0	1	6
01101110001	9.364784212633298	9.432593289068908	9.335318355798213	9.377565285833475	0.02036385701357399	9.556628203208675	9.65242138664024	9.677062101228584	9.628703897025835	0.025974251459456976	0	1	1	0	1	1	1	0	0	0	1	6
10111000000	8.09886624945091	8.45863620861141	8.167222692511848	8.241575050191388	0.07800086612549736	7.0	7.0	7.0	7.0	0.0	1	0	1	1	1	0	0	0	0	0	0	4
10010101100	9.040154007419916	9.122699937787832	9.084845514370484	9.082566486526078	0.016868872373955925	9.131313050352016	9.242070919731338	9.132098803661586	9.168494257914979	0.026013772714643887	1	0	0	1	0	1	0	1	1	0	0	5
00000101101	7.0	7.0	7.0	7.0	0.0	7.929807011923217	8.476374533738126	8.246887824729662	8.217689790130335	0.1120441935830606	0	0	0	0	0	1	0	1	1	0	1	4
10110111011	9.308645180040902	9.367066946299762	9.290042918886973	9.321918348409213	0.016407863707287983	9.71176141420486	9.59704323522942	9.622923139076525	9.643909262836935	0.024564127604176977	1	0	1	1	0	1	1	1	0	1	1	8
00001101001	7.0	7.0	7.0	7.0	0.0	8.201560372643723	8.803412426983359	8.657383515291215	8.554118771639432	0.12816277364437212	0	0	0	0	1	1	0	1	0	0	1	4
00100011101	8.516139058353234	8.89916317216694	8.493559579060065	8.63628726986008	0.09305487917668272	7.0		7.0	7.0	0.0	0	0	1	0	0	0	1	1	1	0	1	5
00111100011	7.0	7.0	7.0	7.0	0.0	7.184940048537969		7.0	7.092470024268985	0.05338759340366952	0	0	1	1	1	1	0	0	0	1	1	6
00000101001	7.0	7.0	7.0	7.0	0.0	8.019631322239412	8.728168509078388	8.356933458597139	8.368244429971647	0.14468482403630467	0	0	0	0	0	1	0	1	0	0	1	3
11111011100	9.536190797115994	9.53475209073864	9.616943379020297	9.562628755624978	0.01920536472335103	9.19084653809512	9.339195925754256	9.387712531598671	9.305918331816017	0.041872034309456796	1	1	1	1	1	0	1	1	1	0	0	8
11100111110	9.410089194111158	9.4521154231379	9.460026864426027	9.44074382722503	0.010957703715676925	10.122689324747077	10.054598236971623	10.060808064041117	10.079365208586607	0.015369747172463748	1	1	1	0	0	1	1	1	1	1	0	8
01011101001	8.480448748804191	8.840197537355506	8.534831791853177	8.618492692670957	0.07916665697571856	8.399263981465154	8.966254123311538	9.139570471589707	8.835029525455466	0.15807611359827026	0	1	0	1	1	1	0	1	0	0	1	6
01111100010	8.693671042453612	8.991732052033175	8.797901083414974	8.827768059300587	0.06175100342546518	9.144063958137977	9.171604970220557	9.419773557539418	9.245147495299317	0.06199505766153988	0	1	1	1	1	1	0	0	0	1	0	6
00010110001	8.355816861552452	8.70747920922336	8.259687921226961	8.440994664000925	0.09623816197662244	8.762805243743014	9.123312575115976	9.219472210541662	9.035196676466883	0.09828486517713221	0	0	0	1	0	1	1	0	0	0	1	4
10110011100	9.479310694017864	9.41939153458326	9.462771216555227	9.453824481718783	0.012633351792065914	7.824010155147349	8.675015091566385		8.249512623356868	0.24566396456161546	1	0	1	1	0	0	1	1	1	0	0	6
01101100001	8.226939882897554	8.808798012544717	8.253735965652082	8.429824620364784	0.13409892585825128	8.961629946154874	9.099435317717827	9.363023224231805	9.141362829368168	0.08326421609974304	0	1	1	0	1	1	0	0	0	0	1	5
00110000111	8.605831254085555	8.874456088053465	8.835615430867035	8.771967591002019	0.059270722108648796	7.5271241322473035			7.5271241322473035	0.0	0	0	1	1	0	0	0	0	1	1	1	5
10111100110	9.244023363340776	9.209700771570242	9.263459674587137	9.23906126983272	0.011112843113428255	9.40731923992457	9.387502240741169	9.38719565619475	9.394005712286829	0.004707458835750003	1	0	1	1	1	1	0	0	1	1	0	7
10000010110	9.416809438063654	9.4083370799493	9.462530023502094	9.429225513838349	0.011901246335022415	8.526538245401081	9.126792745957877	9.158912222476296	8.93741440461175	0.1454145389617434	1	0	0	0	0	0	1	0	1	1	0	4
00111101011	7.0	7.0	7.0	7.0	0.0	7.0	7.0	7.0	7.0	0.0	0	0	1	1	1	1	0	1	0	1	1	7
00010010100	8.724956588989452	8.965604358924264	8.772190390976371	8.820917112963363	0.05205535094228652	7.0	7.0	7.0	7.0	0.0	0	0	0	1	0	0	1	0	1	0	0	3
10000100011	8.419193730593332	8.793771746997804	8.176445524581535	8.463137000724222	0.12696533284262582	8.918297306080378	9.196105138522377	9.1009338903852	9.071778778329318	0.057636523953672684	1	0	0	0	0	1	0	0	0	1	1	4
01011001010	7.751281343428577	8.115544307532351		7.933412825480464	0.10515366019056266			7.0	7.0	0.0	0	1	0	1	1	0	0	1	0	1	0	5
10011011100	9.425083848513804	9.413993506195533	9.453891466694278	9.43098960713454	0.008407539291757176	7.8127938521153295	8.559689411681601		8.186241631898465	0.21561017618606163	1	0	0	1	1	0	1	1	1	0	0	6
01111011010	9.032595390384436	9.166729283802114	9.12429808258207	9.107874252256208	0.027988932314922287						0	1	1	1	1	0	1	1	0	1	0	7
10101100000	8.090672482023027	8.336292844227481	7.8867732777871025	8.104579534679205	0.09188943967106407	8.296620850692099	9.0841358450182	8.827525416731373	8.736094037480557	0.16396886869458346	1	0	1	0	1	1	0	0	0	0	0	4
10001000010	8.244793320289933	8.489971495112497	8.341634745550765	8.358799853651064	0.050413399433090936			7.0	7.0	0.0	1	0	0	0	1	0	0	0	0	1	0	3
01100000100	8.013110248559169	8.617484893950309	8.360047324977161	8.330214155828878	0.12381753475981565	7.9418037879092	8.934573124390086		8.438188456149643	0.2865878218302228	0	1	1	0	0	0	0	0	1	0	0	3
00111000010	7.0	7.0	7.0	7.0	0.0	7.0		7.0	7.0	0.0	0	0	1	1	1	0	0	0	0	1	0	4
11110100001	9.44533655161814	9.4854201304525	9.39878541371557	9.443180698595404	0.017700655885746788	9.537863951380864	9.400637592400523	9.410000741786883	9.449500761856088	0.031299513012322165	1	1	1	1	0	1	0	0	0	0	1	6
11011011111	9.557083298589593	9.572775036035587	9.613776523776805	9.581211619467327	0.011950679203379553	9.629511871792145	9.623044192454016	9.566045310147556	9.606200458131239	0.014258241191201216	1	1	0	1	1	0	1	1	1	1	1	9
01001101010	8.32640965405833	8.747087328988671	8.450525689357546	8.508007557468183	0.08824261103846609	8.372235780422859	9.05008831468406	9.132382704193931	8.851568933100284	0.1703003694838232	0	1	0	0	1	1	0	1	0	1	0	5
00010100010	7.0	7.0	7.0	7.0	0.0	7.0		7.0	7.0	0.0	0	0	0	1	0	1	0	0	0	1	0	3
00010011001	9.06084323748208	9.231351526436349	9.068570567126187	9.120255110348205	0.03931017289154632	7.0		7.0	7.0	0.0	0	0	0	1	0	0	1	1	0	0	1	4
01000101011	8.609899562277084	8.938528783587827	8.849718211237088	8.799382185700667	0.06940170251865684	8.7640847907209	9.113033023369002	9.188677488821199	9.021931767637033	0.09246108993965953	0	1	0	0	0	1	0	1	0	1	1	5
10000101000	7.713844569048756	8.015044221577003	7.561375465754675	7.763421418793478	0.09424899029105742	8.319836160613782	8.9376005490131	8.864220082804287	8.70721893081039	0.13777713355824195	1	0	0	0	0	1	0	1	0	0	0	3
11001000111	9.442332039134092	9.465294098512551	9.479833568115698	9.462486568587448	0.0077190547478282875	9.728335743754846	9.702702996201056	9.672190609793386	9.70107644991643	0.011474996416118438	1	1	0	0	1	0	0	0	1	1	1	6
01100111001	9.305595992998585	9.43647545458842	9.314753885525318	9.352275111037441	0.029827951486986012	9.535245097326927	9.470205695350641	9.604040511443694	9.536497101373755	0.027322503348172177	0	1	1	0	0	1	1	1	0	0	1	6
00000000011	7.0	7.0	7.0	7.0	0.0	7.0	7.0	7.0	7.0	0.0	0	0	0	0	0	0	0	0	0	1	1	2
11010110001	9.463270431185599	9.54125936310102	9.51218217036696	9.505570654884528	0.01609012366877005	9.923894687096436	9.928214577044326	9.951411524430528	9.934506929523764	0.006041376209273181	1	1	0	1	0	1	1	0	0	0	1	6
10001011101	9.37715603868551	9.391238798961847	9.488741771914617	9.419045536520658	0.024808449351372896	8.575901566866348	9.104931304979267	9.091438137697194	8.92409033651427	0.12313412800176196	1	0	0	0	1	0	1	1	1	0	1	6
00110111000	8.762967320981828	8.924163301253552	8.634932382846634	8.774021001694004	0.05916821913492698	9.044913102094334	9.305712854928327	9.34030919922865	9.230311718750437	0.06592762705324956	0	0	1	1	0	1	1	1	0	0	0	5
00110000110	8.461897745891285	8.727753323907455	8.748121803670282	8.64592429115634	0.06519591725919376	7.588728174740892	8.364322254460891		7.976525214600891	0.22389472535411087	0	0	1	1	0	0	0	0	1	1	0	4
00001110000	8.067096610956208	8.37663220780126	7.748524715229572	8.064084511329012	0.12821632768768584	8.657276367012008	9.107357635816161	9.284666975367688	9.016433659398619	0.1320385808383993	0	0	0	0	1	1	1	0	0	0	0	3
00000101011	7.0	7.0	7.0	7.0	0.0	7.166373780160861		7.0	7.08318689008043	0.04802797338098446	0	0	0	0	0	1	0	1	0	1	1	4
01110101010	8.426605849927011	8.752330026891839	8.650644267478357	8.609860048099067	0.0680337836147565	7.972193247699069	8.433569157917576		8.202881202808323	0.13318775298113186	0	1	1	1	0	1	0	1	0	1	0	6
00000011010	8.364184310984214	8.64069878474141	8.224324987482273	8.409736027735965	0.08650433894249861	7.0	7.0	7.0	7.0	0.0	0	0	0	0	0	0	1	1	0	1	0	3
10010000110	9.310472174279164	9.312846769671982	9.345081943060359	9.322800295670502	0.00789264988902494	8.47608469093219	9.171357355346528	9.240221862954584	8.9625546364111	0.17256657458920788	1	0	0	1	0	0	0	0	1	1	0	4
01100101110	8.756225296457059	9.014692772269058	8.89923481478885	8.890050961171655	0.05285927289921661	9.149606674166877	9.184482044623898	9.260241579147438	9.198110099312737	0.02309153328230188	0	1	1	0	0	1	0	1	1	1	0	6
01100001110	7.965636532652452	8.026861551979584		7.996249042316018	0.01767414069482991	7.921740421263754	8.759457146964907		8.34059878411433	0.24182798854410625	0	1	1	0	0	0	0	1	1	1	0	5
00110001111	7.704908411684549	7.640790513899847		7.672849462792199	0.01850924277293534	7.0	7.0	7.0	7.0	0.0	0	0	1	1	0	0	0	1	1	1	1	6
00100111010	8.217397454442546	8.598083561961419	8.061412953782684	8.292297990062217	0.11270270855797153	8.865717571316386	9.15532238773492	9.331732602897661	9.117590853982989	0.09605575975648986	0	0	1	0	0	1	1	1	0	1	0	5
00001110001	8.200583738645703	8.590368915458582	7.913366568300399	8.234773074134894	0.13872017848311075	8.9817769971867	9.162272347183707	9.203705649564343	9.115918331311583	0.048174340986919736	0	0	0	0	1	1	1	0	0	0	1	4
11010101101	9.418846010016676	9.430050722539784	9.465491962320419	9.438129564958961	0.009940757748667647	9.995967647276323	9.920893367286643	9.922083251200489	9.946314755254486	0.017556628475362046	1	1	0	1	0	1	0	1	1	0	1	7
11000011111	9.528266934538244	9.543239353303775	9.578503926719396	9.550003404853806	0.010529744701565362	9.600294094131897	9.677276572410081	9.562655692260424	9.613408786267467	0.02385191433242689	1	1	0	0	0	0	1	1	1	1	1	7
10010101110	9.188338413366528	9.19581858457858	9.170015711679797	9.184724236541635	0.005419775026832841	9.372021469706953	9.33706170627964	9.29305177665125	9.334044984212614	0.016154868019424895	1	0	0	1	0	1	0	1	1	1	0	6
01110111000	9.428980235149792	9.38918401447388	9.432701366053973	9.41695520522588	0.009847935322015099	9.310971149993216	9.329783639887207	9.506989078454662	9.38258128944503	0.04415210625157464	0	1	1	1	0	1	1	1	0	0	0	6
11100011110	9.530536182754334	9.54784258341146	9.578046261314336	9.55214167582671	0.009816342987509255	9.534839654040972	9.554227720649996	9.440482515059827	9.509849963250266	0.02484235775528296	1	1	1	0	0	0	1	1	1	1	0	7
11001000010	9.41999466775416	9.471442266410518	9.444116310501665	9.44518441488878	0.010508484564965838	9.458743346571902	9.350395160851978	9.337878951407557	9.382339152943812	0.027133510885014242	1	1	0	0	1	0	0	0	0	1	0	4
10000101110	9.075110342675156	9.08831914129693	8.990603983070082	9.051344489014056	0.021643609091388787	9.417987912181546	9.415652007157833	9.380020292268725	9.404553403869368	0.008686860640042971	1	0	0	0	0	1	0	1	1	1	0	5
10000101100	8.85308871568334	8.974357352113456	8.835597853271512	8.887681307022769	0.030851891247808048	9.253333690453873	9.283070809999973	9.205352348936028	9.247252283129958	0.01600925479119561	1	0	0	0	0	1	0	1	1	0	0	4
00000100001	7.0	7.0	7.0	7.0	0.0	7.638488025213256	8.140959082300212		7.889723553756734	0.1450509000345748	0	0	0	0	0	1	0	0	0	0	1	2
11010001011	9.440859556040712	9.465000765608943	9.50328139809316	9.469713906580937	0.012850303917752357	9.257457795012616	9.259721745211175	9.180276930387727	9.23248549020384	0.018464297333772903	1	1	0	1	0	0	0	1	0	1	1	6
10010011001	9.520116347748251	9.534265491691556	9.541315559060287	9.531899132833365	0.004407406280860106	8.169504357423609	9.1974208535836	8.685173824535951	8.684033011847719	0.20982296381300844	1	0	0	1	0	0	1	1	0	0	1	5
01101001000	7.0	7.0	7.0	7.0	0.0	7.0	7.0	7.0	7.0	0.0	0	1	1	0	1	0	0	1	0	0	0	4
10100111110	9.35406019221617	9.272129246541137	9.36551050118462	9.33056664664731	0.020792525468882817	10.027101468357957	9.997150726039466	9.943008068286066	9.989086754227829	0.017400649963660114	1	0	1	0	0	1	1	1	1	1	0	7
10000111010	9.207941167953896	9.16413167319226	9.149523527750775	9.173865456298977	0.012411117810937239	9.413509083948986	9.42624589851884	9.408580539072439	9.416111840513421	0.0037214913541240135	1	0	0	0	0	1	1	1	0	1	0	5
10100101100	8.995575555879778	9.030175435162356	9.010230933924968	9.011993974989034	0.007090123963860121	9.299240184510364	9.291959588579363	9.18638583804838	9.259195203712702	0.025784861726758514	1	0	1	0	0	1	0	1	1	0	0	5
10000011110	9.409108194632546	9.386985551986065	9.397450039825957	9.397847928814855	0.004517956140992557	8.454155569357383	9.157288779084654	9.102737765270334	8.904727371237456	0.15968988945460047	1	0	0	0	0	0	1	1	1	1	0	5
11101010100	9.504675908877383	9.553169765562199	9.53988202415666	9.532575899532082	0.010230250296826233	9.278689220712927	9.422083192267717	9.399017830335232	9.36659674777196	0.031434595367458164	1	1	1	0	1	0	1	0	1	0	0	6
00111000011	7.0	7.0	7.0	7.0	0.0	7.0		7.0	7.0	0.0	0	0	1	1	1	0	0	0	0	1	1	5
11010101001	9.355973233533604	9.444743340558363	9.412738688512142	9.404485087534702	0.01835358467310899	9.317972124527472	9.28156091724452	9.285733296684956	9.29508877948565	0.008135188973179878	1	1	0	1	0	1	0	1	0	0	1	6
01010000011	8.367144038389041	9.02011908486766	8.639005168205285	8.675422763820663	0.13390841632980777	8.597194805561486	9.06894159746864	9.128350636384301	8.93149567980481	0.11881369475366904	0	1	0	1	0	0	0	0	0	1	1	4
10100010111	9.393319607862427	9.435188563138562	9.443013715727274	9.423840628909423	0.010908389719022322	9.006785517173512	9.22653058436376	9.130437199962818	9.12125110050003	0.044972699044562574	1	0	1	0	0	0	1	0	1	1	1	6
00100100000	7.0	7.0	7.0	7.0	0.0	7.23538340493838	7.0	7.0	7.07846113497946	0.055480400603569256	0	0	1	0	0	1	0	0	0	0	0	2
01111101110	9.090661205590207	9.1747033537526	9.165967651085824	9.143777403476209	0.01886388075869404	9.043771662116956	9.151926461059062	9.236358286304126	9.14401880316005	0.039410870420985865	0	1	1	1	1	1	0	1	1	1	0	8
00111011001	9.15661426348997	9.407317770776867	9.197337774566595	9.253756602944478	0.0549247595778951			7.0	7.0	0.0	0	0	1	1	1	0	1	1	0	0	1	6
10111110010	9.197239068975344	9.195155135050245	9.173283025800444	9.188559076608678	0.0054176254234496015	9.124909206551935	9.18845807383087	9.251719331849866	9.188362204077558	0.02588503062510725	1	0	1	1	1	1	1	0	0	1	0	7
10100100100	8.876281404582182	8.964961300289882	8.865331077111561	8.90219126066121	0.022304841866612156	9.177599774457539	9.310799538846236	9.199500672456015	9.229299995253262	0.029159172478204556	1	0	1	0	0	1	0	0	1	0	0	4
10001000001	8.177713725357961	8.496640131418436	8.063340556651488	8.245898137809297	0.09167330213799511	7.0		7.0	7.0	0.0	1	0	0	0	1	0	0	0	0	0	1	3
11100111000	9.37933076830433	9.386665019583333	9.399800997200002	9.388598928362555	0.004234040035534659	9.966889119817433	9.942244374768773	9.991411232794798	9.966848242460335	0.010036153274176365	1	1	1	0	0	1	1	1	0	0	0	6
10000011011	9.402677303466273	9.491010010978133	9.422801855374447	9.438829723272951	0.018900336046937038	8.481537039672098	9.17307793922955	9.209259492753905	8.954624823885185	0.1674247666279767	1	0	0	0	0	0	1	1	0	1	1	5
00111000110	8.90132214420048	9.135040435820944	8.893098950599121	8.976487176873515	0.056082167650673045	7.619220272339143	8.679778800375807		8.149499536357474	0.3061568758266608	0	0	1	1	1	0	0	0	1	1	0	5
10000100001	8.181842598213795	8.608926686245686	8.149199102567513	8.313322795675665	0.10472395821245349	8.786965237681791	9.075789219772453	9.134134095779837	8.998962851078026	0.07589276667701847	1	0	0	0	0	1	0	0	0	0	1	3
01100001111	8.20882263735945	8.870395483179648	8.418688604732901	8.499302241757333	0.13801785901191	8.2597189084724	9.1187442073882	8.935526201894081	8.771329772584894	0.18470763681773775	0	1	1	0	0	0	0	1	1	1	1	6
10001000000	7.554171403731416	7.765602568475828		7.659886986103622	0.0610349199401312	7.0	7.0	7.0	7.0	0.0	1	0	0	0	1	0	0	0	0	0	0	2
00100000110	8.207935449427351	8.671790435058007	8.570962434044953	8.483562772843436	0.09959868431795735	7.3107575306474875			7.3107575306474875	0.0	0	0	1	0	0	0	0	0	1	1	0	3
10110101100	9.1433354934489	9.142619076629886	9.023563506057995	9.103172692045595	0.02814647752819382	9.242257864592249	9.280721939917632	9.204418019434092	9.242465941314657	0.015575646279964234	1	0	1	1	0	1	0	1	1	0	0	6
10100011110	9.40732787726776	9.385631540009898	9.475410259428276	9.422789892235311	0.019123981651509213	8.573152105516295	9.139255172407553	9.172308786557505	8.961572021493785	0.13749282326607906	1	0	1	0	0	0	1	1	1	1	0	6
00100101000	7.0	7.0	7.0	7.0	0.0	7.1493997753006795		7.0	7.07469988765034	0.04312800024335846	0	0	1	0	0	1	0	1	0	0	0	3
10000101101	9.025621799294877	9.087058594351717	8.950416318962064	9.021032237536218	0.02793914790447211	9.320479850901032	9.374082213068288	9.244137943854904	9.312900002608075	0.026659797606315698	1	0	0	0	0	1	0	1	1	0	1	5
00010001101	7.0	7.0	7.0	7.0	0.0	7.0	7.0	7.0	7.0	0.0	0	0	0	1	0	0	0	1	1	0	1	4
10011110000	9.21696552748857	9.220477193913338	9.205088989631797	9.214177237011235	0.00329216571555631	8.906349243111089	9.25741652653932	9.160000620342027	9.107922129997478	0.0739889476440511	1	0	0	1	1	1	1	0	0	0	0	5
10000010111	9.419764611985832	9.459434441537029	9.440990818085892	9.440063290536251	0.008104207494379819	8.716159191711771	9.197269183683627	9.202175851131056	9.038534742175484	0.11398136945640622	1	0	0	0	0	0	1	0	1	1	1	5
01111111011	9.327054840457588	9.397767476995403	9.35258657330212	9.35913629691837	0.014618728861288594	9.090321863617168	9.274736975225187	9.336583691557944	9.233880843466766	0.05230223003830579	0	1	1	1	1	1	1	1	0	1	1	9
01011001110	8.466526230967213	8.560716040123769	8.780133638035847	8.60245863637561	0.06569403156358164	8.477768982673759	9.182963524757488	8.757976197438142	8.806236234956463	0.14495494067819983	0	1	0	1	1	0	0	1	1	1	0	6
11010011111	9.551557109081953	9.564755177246793	9.624199898917931	9.58017072841556	0.01579806497732212	9.449926427138987	9.56898926007409	9.485582893069566	9.501499526760881	0.02494658950531692	1	1	0	1	0	0	1	1	1	1	1	8
11001000011	9.48062927410224	9.478870238823344	9.427108277545386	9.462202596823657	0.012412909848768933	9.293082338844807	9.38617595041794	9.33375409824212	9.337670795834955	0.019053042272200876	1	1	0	0	1	0	0	0	0	1	1	5
01111001100	7.88207266989686	8.003178978794155		7.942625824345507	0.03496038002120775	7.0		7.0	7.0	0.0	0	1	1	1	1	0	0	1	1	0	0	6
00010111011	8.532123195814528	9.027419955755642	8.533139387527447	8.697560846365873	0.11662299101303482	8.91559528463546	9.237563467900491	9.242371890755852	9.131843547763934	0.07646160660984314	0	0	0	1	0	1	1	1	0	1	1	6
00000110010	7.815675102767905	8.057117377562298	7.553895871611521	7.808896117313908	0.10274761716270352	8.232951203932007	8.686486884183765	8.644731851974589	8.52138998003012	0.10233406596895483	0	0	0	0	0	1	1	0	0	1	0	3
10010011110	9.383209725147848	9.413111230791603	9.468672409957609	9.42166445529902	0.017705158668350627	8.435657919872963	9.173004298546074	8.892134345606244	8.833598854675094	0.15192636555773814	1	0	0	1	0	0	1	1	1	1	0	6
10010011100	9.4233674299091	9.388652008533516	9.439219076800528	9.417079505081048	0.01055865046034606	7.609307817191888			7.609307817191888	0.0	1	0	0	1	0	0	1	1	1	0	0	5
01100011111	9.191217778155716	9.365385124283254	9.315273257869071	9.290625386769348	0.03660419893170015	8.625223781502394	9.334698561861686	9.164796834223376	9.041573059195818	0.15123199068566698	0	1	1	0	0	0	1	1	1	1	1	7
11110101101	9.381965575872318	9.417930707731607	9.430310977196656	9.410069086933527	0.010252424660232311	9.946924168615736	9.931715513016504	9.955538677186176	9.94472611960614	0.004924587162903875	1	1	1	1	0	1	0	1	1	0	1	8
01100001011	7.6916059234412835			7.6916059234412835	0.0						0	1	1	0	0	0	0	1	0	1	1	5
01010001100	7.763983004246903	7.944151650132264		7.854067327189584	0.05201020810072186			7.0	7.0	0.0	0	1	0	1	0	0	0	1	1	0	0	4
01100001100	7.629995666010424	7.738620064045532		7.684307865027978	0.031357162723065275		7.0	7.0	7.0	0.0	0	1	1	0	0	0	0	1	1	0	0	4
01111001010	7.664874048378528	7.991263520399689	7.6504153426395956	7.768850970472603	0.07869007806654342		7.0	7.0	7.0	0.0	0	1	1	1	1	0	0	1	0	1	0	6
01101111000	9.231559886636699	9.345459640563185	9.373024917721274	9.316681481640385	0.030616514003010818	9.350723704237664	9.367430051068794	9.465465738688874	9.394539831331779	0.02530691195744442	0	1	1	0	1	1	1	1	0	0	0	6
10100010110	9.415212459494489	9.3933974997513	9.407498642048353	9.405369533764715	0.0045161366917575415	8.793652018043987	9.156828303892238	9.176575850537574	9.042352057491266	0.08802108991167602	1	0	1	0	0	0	1	0	1	1	0	5
11011100001	9.389433999990617	9.461894545892273	9.456063478353972	9.435797341412288	0.016435073815856092	9.484744018345332	9.379170734204443	9.392141648506165	9.418685467018646	0.023504823288674388	1	1	0	1	1	1	0	0	0	0	1	6
11000101011	9.336740283030585	9.396687837001494	9.331389902893577	9.35493934097522	0.014800671900539875	9.798213078456648	9.785148909425383	9.730520257760027	9.771294081880685	0.014660301714642986	1	1	0	0	0	1	0	1	0	1	1	6
01101101110	8.906730760408669	9.064521039248856	8.898501365979719	8.956584388545748	0.03819832273132846	9.249916669882804	9.211418524961626	9.313646431132051	9.258327208658827	0.02107798643084986	0	1	1	0	1	1	0	1	1	1	0	7
00011111000	8.563055191444434	8.670902078776107	8.423282500758651	8.552413256993065	0.05068497793731431	9.046648781620895	9.221402338651576	9.415593084748165	9.227881401673544	0.07534527014102999	0	0	0	1	1	1	1	1	0	0	0	5
00100011011	8.52518567672255	9.094701420285674	8.590458392051152	8.736781829686459	0.12724317718619488	7.0	7.0	7.0	7.0	0.0	0	0	1	0	0	0	1	1	0	1	1	5
11110101111	9.432031006521944	9.428477251788207	9.490883697770363	9.450463985360171	0.014308925866213816	10.007844613856324	9.960336348322103	10.001877411205284	9.990019457794572	0.010565013944110472	1	1	1	1	0	1	0	1	1	1	1	9
00111011111	8.877431111066633	9.004227205131242	8.616721115954533	8.832793144050802	0.0806583880342859			7.0	7.0	0.0	0	0	1	1	1	0	1	1	1	1	1	8
11000010100	9.516448198397438	9.512765521237927	9.520582145988463	9.516598621874609	0.0015964479341930497	9.136779591941453	9.317570766352622	9.20456486228206	9.219638406858712	0.03728666203845703	1	1	0	0	0	0	1	0	1	0	0	4
01000011001	8.842162494213703	9.197136360656689	8.902504961069523	8.980601271979971	0.07754126514071588	7.899695983157853	8.928669788602694	8.234052308524848	8.35413936009513	0.21428658693404104	0	1	0	0	0	0	1	1	0	0	1	4
11100101110	9.338453098698203	9.380723121560466	9.382824824715355	9.367333681658009	0.010219836455895135	10.00569124468422	9.982178048657538	9.944616586543695	9.977495293295151	0.012576264781215611	1	1	1	0	0	1	0	1	1	1	0	7
10100011100	9.423981311231929	9.333464882607382	9.41720370419274	9.391549966010684	0.020582726069736212	7.960706034686905	8.932140315686274	8.561433340389062	8.484759896920748	0.20013755822565177	1	0	1	0	0	0	1	1	1	0	0	5
00000100000	7.0	7.0	7.0	7.0	0.0	7.0	7.0	7.0	7.0	0.0	0	0	0	0	0	1	0	0	0	0	0	1
11110111110	9.462405984302707	9.478468470544183	9.518806873281507	9.486560442709466	0.01186293302365619	10.088049836787912	10.002181624281931	10.078881110042284	10.056370857037374	0.019249983106060922	1	1	1	1	0	1	1	1	1	1	0	9
01110010100	9.024809920627558	9.346741490628757	9.338302220605296	9.236617877287204	0.07490523256965329	7.904098693718335	8.812528487355467		8.3583135905369	0.2622410929481372	0	1	1	1	0	0	1	0	1	0	0	5
00001101100	7.0	7.0	7.0	7.0	0.0	7.732698092422522	8.433915928560621		8.083307010491572	0.20242415322744917	0	0	0	0	1	1	0	1	1	0	0	4
11101100001	9.30647560368684	9.418171591007258	9.324743557457113	9.349796917383737	0.024460006570524103	9.454097469232547	9.475657394232359	9.530508458143188	9.486754440536032	0.01608321140234403	1	1	1	0	1	1	0	0	0	0	1	6
11010111011	9.46344378702292	9.489706465750142	9.516151176868801	9.489767143213955	0.010758872287616064	10.035646046401649	10.003880151956707	10.074732721643782	10.03808630666738	0.014488431077005455	1	1	0	1	0	1	1	1	0	1	1	8
11010100010	9.406993917132217	9.438564938685177	9.331006353135935	9.392188402984443	0.022570684409292798	9.54632873396539	9.569667541925462	9.657666097500748	9.591220791130533	0.023970151728149362	1	1	0	1	0	1	0	0	0	1	0	5
11001110010	9.38034314134932	9.359340228984268	9.420259609594023	9.38664765997587	0.012633308815742166	9.87016439652868	9.867479106747496	9.883053910475637	9.873565804583938	0.00339903933392236	1	1	0	0	1	1	1	0	0	1	0	6
01111011110	9.28040334516525	9.46844716789301	9.310523434771998	9.353124649276753	0.04123361780650478	8.496854774030886	9.21418424715092	9.182322880145136	8.96445396710898	0.16544915669289115	0	1	1	1	1	0	1	1	1	1	0	8
00101111010	8.251623565043763	8.651417247645192	8.146821927406219	8.349954246698392	0.10870893977173314	8.93050204973672	9.236878423224663	9.30948799444614	9.158956155802509	0.08211932008971289	0	0	1	0	1	1	1	1	0	1	0	6
11011111010	9.45236602034724	9.454247657368716	9.462347162493677	9.456320280069876	0.0021651644773115234	10.037169602467486	9.939371313835355	10.014399765020112	9.99698022710765	0.02089141187448459	1	1	0	1	1	1	1	1	0	1	0	8
01110110010	9.38254821949804	9.466009192994447	9.430132089733004	9.426229834075164	0.017092172787840504	9.207914526795387	9.169395636378985	9.409250839100519	9.262187000758297	0.05258604954530579	0	1	1	1	0	1	1	0	0	1	0	6
10010011111	9.492023723264484	9.478038400185143	9.484792475484356	9.484951532977995	0.002855295952935489	8.66517877393839	9.13287377712807	9.067450899277176	8.955167816781213	0.10339267540405157	1	0	0	1	0	0	1	1	1	1	1	7
10001011110	9.390573498647203	9.374699782039196	9.425711648975449	9.39699497655395	0.01065738535758674	8.632733171323682	9.197813671360263	9.245317812718561	9.025288218467502	0.13912749526969392	1	0	0	0	1	0	1	1	1	1	0	6
11111111101	9.497225929713556	9.464661344933166	9.543185217531716	9.501690830726146	0.016106164181028722	10.139807078611259	10.032840110815094	10.077312698891653	10.083319962772668	0.02193759506865843	1	1	1	1	1	1	1	1	1	0	1	10
10010011010	9.45398308735744	9.418476957786764	9.503360277625603	9.458606774256602	0.017403679482233037	8.189060612522871	9.047202990274751	8.94833095400334	8.72819818560032	0.19167938157115205	1	0	0	1	0	0	1	1	0	1	0	5
01101111011	9.244291742366988	9.345211948319829	9.327379970527227	9.305627887071347	0.02198896254713034	9.420068464102668	9.420667878848102	9.509405463261498	9.450047268737423	0.02098664760976102	0	1	1	0	1	1	1	1	0	1	1	8
00001111001	8.52202516915504	8.736097170212295	8.520710027297486	8.592944122221606	0.05061295743399863	9.292100544004086	9.342803513693172	9.40606862104494	9.346990892914064	0.023310695880690204	0	0	0	0	1	1	1	1	0	0	1	5
00001000110	8.588342751781616	8.787621654878164	8.541762955512462	8.639242454057415	0.05331464742806346	7.320789280917048		7.0	7.160394640458524	0.09260388884530216	0	0	0	0	1	0	0	0	1	1	0	3
01110010110	9.406063357225868	9.515855635501792	9.450035848587957	9.45731828043854	0.022558669628689867	9.192407414788496	9.274827098267869	9.401937977231164	9.289724163429176	0.04309332133521453	0	1	1	1	0	0	1	0	1	1	0	6
10000111001	9.231812061752773	9.268333313964103	9.27648555217395	9.25887697596361	0.009712508540429012	9.50767471248915	9.491905824135523	9.492510330747356	9.497363622457343	0.0036476085840350825	1	0	0	0	0	1	1	1	0	0	1	5
10000010101	9.449894811449926	9.471641631288891	9.486150650875928	9.469229031204916	0.007449686262911782	7.5440535010593806	8.677799599488006		8.110926550273692	0.32728430756022747	1	0	0	0	0	0	1	0	1	0	1	4
00010011010	8.420233224515446	8.827200691784531	8.633555003004139	8.626996306434705	0.08310424400451416	7.0	7.0	7.0	7.0	0.0	0	0	0	1	0	0	1	1	0	1	0	4
00001101101	7.0	7.0	7.0	7.0	0.0	8.0655239915914	8.789457695919499	8.6520005272005	8.5023274049038	0.15696153176234137	0	0	0	0	1	1	0	1	1	0	1	5
11111100000	9.333269112118009	9.444007364128273	9.33948341854676	9.372253298264347	0.025400586860349954	9.279632338644408	9.288663810416486	9.382437631490976	9.316911260183955	0.02324030576782328	1	1	1	1	1	1	0	0	0	0	0	6
10100011111	9.446124196965688	9.458538246388246	9.437692405484835	9.44745161627959	0.0042809423080431945	8.791578254779322	9.204419672378764	9.116016819627463	9.037338248928515	0.08874330691832573	1	0	1	0	0	0	1	1	1	1	1	7
00010111001	8.880210587784447	9.10904978524885	8.816033773882197	8.935098048971831	0.06288093348544149	9.16839132172538	9.317635717364515	9.282516023728132	9.256181020939342	0.031855459203347515	0	0	0	1	0	1	1	1	0	0	1	5
11101111100	9.445543813160693	9.411464848975383	9.464407741974199	9.440472134703425	0.010954671161590232	10.123528631049318	10.028425665524344	10.067737989175383	10.07323076191635	0.019509704539019544	1	1	1	0	1	1	1	1	1	0	0	8
00010001111	7.765047618988711	7.999171220746722		7.882109419867716	0.06758566224931616			7.0	7.0	0.0	0	0	0	1	0	0	0	1	1	1	1	5
10101111101	9.296500282580137	9.287383700882392	9.324310910006863	9.302731631156464	0.007853098881337381	10.057022242956947	10.020324323284946	9.95650207910314	10.011282881781677	0.02076610452813988	1	0	1	0	1	1	1	1	1	0	1	8
10000001100	8.121992562304474	7.742857431122644	8.337565523584766	8.067471839003963	0.12291515417954797	7.0	7.0	7.0	7.0	0.0	1	0	0	0	0	0	0	1	1	0	0	3
00011011110	8.657677932978562	8.779411135023473	8.472219236186291	8.636436101396109	0.06315342064440023			7.0	7.0	0.0	0	0	0	1	1	0	1	1	1	1	0	6
11101111110	9.403866290191381	9.46622528734078	9.458289042276263	9.442793539936142	0.013857874271506141	10.14847684467214	10.048200134924434	10.083577770551008	10.093418250049195	0.020762469775302623	1	1	1	0	1	1	1	1	1	1	0	9
00000001011	7.0	7.0	7.0	7.0	0.0	7.0	7.0	7.0	7.0	0.0	0	0	0	0	0	0	0	1	0	1	1	3
11100101100	9.249695534808136	9.326849972485556	9.298499478274485	9.29168166185606	0.015932481386914322	9.936944482695068	9.92773557917508	9.85865591211208	9.907778657994076	0.017468944340602685	1	1	1	0	0	1	0	1	1	0	0	6
00101011110	8.502337432712157	8.824904648517624	8.450358101103806	8.592533394111195	0.08283795691431305			7.0	7.0	0.0	0	0	1	0	1	0	1	1	1	1	0	6
00100101101	7.0	7.0	7.0	7.0	0.0	8.094006586909941	8.870670725413365	8.551606317179514	8.50542787650094	0.15937436655923526	0	0	1	0	0	1	0	1	1	0	1	5
00100010101	8.638834458159076	8.845139301392924	8.468505816894972	8.650826525482325	0.07699681018315131	7.0	7.0	7.0	7.0	0.0	0	0	1	0	0	0	1	0	1	0	1	4
10101011101	9.410389965618508	9.386461065193592	9.484682558797603	9.427177863203234	0.020909489793062706	8.720017041033795	9.182179889013556	9.222188962696178	9.041461964247844	0.11394100117260915	1	0	1	0	1	0	1	1	1	0	1	7
10000110011	9.221154335139026	9.208581620998238	9.227028121786343	9.218921359307869	0.003847249745560438	9.382688530279523	9.345806187393668	9.375454211914693	9.367982976529296	0.007978526626989352	1	0	0	0	0	1	1	0	0	1	1	5
01101010101	8.961255570420729	9.119915681591417	8.884936274727623	8.988702508913256	0.04893674699203466	8.654636709126425	9.187501053212062	9.221640148012062	9.021259303450185	0.1298078480228583	0	1	1	0	1	0	1	0	1	0	1	6
01101001011	7.533297794893307	7.846427263126517		7.689862529009912	0.0903926913878242	7.397665286955526			7.397665286955526	0.0	0	1	1	0	1	0	0	1	0	1	1	6
01010000010	8.362247900858383	9.028916484140435	8.500066511430743	8.630410298809855	0.1436743291644176	8.44046498915627	9.154089824137642	8.988713247132564	8.861089353475492	0.15249644528627074	0	1	0	1	0	0	0	0	0	1	0	3
00101101111	7.0	7.0	7.0	7.0	0.0	7.982730766283658	9.03093620929242	9.018684518970268	8.677450498182116	0.24563324808737924	0	0	1	0	1	1	0	1	1	1	1	7
11101011000	9.494213029531783	9.522017822265433	9.503553838127292	9.506594896641504	0.0057765712495308165	9.502631975909072	9.58482954253892	9.43722749458112	9.508229671009703	0.030194071667475637	1	1	1	0	1	0	1	1	0	0	0	6
11010001111	9.481009091936873	9.498431875840376	9.545386324218855	9.508275763998702	0.013594015899329192	9.248315015926279	9.391033533036392	9.089829764223287	9.243059437728654	0.061511033445835424	1	1	0	1	0	0	0	1	1	1	1	7
01110001101	8.013392894562097	8.270160313032656		8.141776603797377	0.07412236908655141			7.0	7.0	0.0	0	1	1	1	0	0	0	1	1	0	1	6
01101101100	8.576478114396057	8.7399939598419	8.76979927349763	8.69542378257853	0.04249145632763571	9.098675973626415	9.261051692396594	9.241277268832807	9.200334978285271	0.03616783072932838	0	1	1	0	1	1	0	1	1	0	0	6
01001111000	9.260816062899805	9.350138849165813	9.34191385275862	9.317622921608079	0.020154309045879643	9.333218279789	9.380770420632984	9.479159830271854	9.397716176897946	0.03038668302310105	0	1	0	0	1	1	1	1	0	0	0	5
10110000111	9.395579057717768	9.396485305427623	9.48658856446958	9.426217642538324	0.021345145749288745	8.779309159099657	9.26587195814699	9.066950743902089	9.03737728704958	0.09986806410363722	1	0	1	1	0	0	0	0	1	1	1	6
11111100100	9.300239332644214	9.380242352680007	9.396239612289897	9.358907099204705	0.02099765147047733	9.968375878812918	9.885025698271983	9.819251727502623	9.890884434862508	0.03051023522752043	1	1	1	1	1	1	0	0	1	0	0	7
11100110000	9.336855500515378	9.359455714306613	9.357997723902931	9.351436312908307	0.0051636792685812215	9.85337604964578	9.824135429367434	9.789628958196694	9.822380145736636	0.01302711072163829	1	1	1	0	0	1	1	0	0	0	0	5
10111111010	9.25789941134192	9.272898838339128	9.294003886001901	9.274934045227651	0.007404838766279914	9.48579735338851	9.500187312409741	9.424431096871988	9.470138587556745	0.016424822468249715	1	0	1	1	1	1	1	1	0	1	0	8
10001111011	9.287315338539287	9.272642044124572	9.262706080492917	9.274221154385593	0.0050542735599119456	9.729629218472628	9.676075592645882	9.559008170764246	9.654904327294252	0.03562314869509788	1	0	0	0	1	1	1	1	0	1	1	7
10001110010	9.213246813343325	9.242438127431962	9.202799998563721	9.219494979779668	0.00838724232496402	9.145986049439172	9.308780483294665	9.309522242002958	9.254762924912264	0.0384587311928036	1	0	0	0	1	1	1	0	0	1	0	5
10001011111	9.383186099843712	9.420436192343074	9.453659625535883	9.419093972574224	0.014393173273593823	8.729812184490289	9.217673527798137	9.110002181281828	9.019162631190085	0.10463511238998391	1	0	0	0	1	0	1	1	1	1	1	7
00101011111	8.623465983069224	8.837916870938889	8.392175594268835	8.617852816092316	0.09100819758360176			7.0	7.0	0.0	0	0	1	0	1	0	1	1	1	1	1	7
10100111010	9.215894679840146	9.19238957590122	9.197154859904288	9.20181303854855	0.005072744967081817	9.571214610429106	9.504826866002151	9.491847737706104	9.522629738045786	0.01738045747004778	1	0	1	0	0	1	1	1	0	1	0	6
00110111110	8.999771934654483	9.21963323300959	8.957367571610677	9.058924246424915	0.05747472818275924	9.222239687039425	9.235983304619008	9.260234328348998	9.23948577333581	0.007853859533109872	0	0	1	1	0	1	1	1	1	1	0	7
00110101111	7.0	7.0	7.0	7.0	0.0	7.548406408835581	8.057860417550728		7.803133413193155	0.14706670453571194	0	0	1	1	0	1	0	1	1	1	1	7
00000110000	7.9811938246740874	8.350050159441983	7.545290736494953	7.958844906870341	0.16446075408272848	8.605001273784799	8.922819236000398	9.081719224820477	8.869846578201892	0.09909555831417804	0	0	0	0	0	1	1	0	0	0	0	2
00110100010	7.0	7.0	7.0	7.0	0.0		7.0	7.0	7.0	0.0	0	0	1	1	0	1	0	0	0	1	0	4
00001111010	8.126715430875809	8.641195889597968	7.917734261139995	8.228548527204591	0.15200146194126765	8.938859124631836	9.123387901834748	9.246889004592713	9.103045343686434	0.06328634198518043	0	0	0	0	1	1	1	1	0	1	0	5
10110100101	9.155543321778307	9.190514362240306	9.131504695714362	9.15918745991099	0.01211400699550818	9.22280337693284	9.285323969441462	9.255675600297957	9.254600982224085	0.012767616750401717	1	0	1	1	0	1	0	0	1	0	1	6
00111111011	8.39231412980347	8.806474740933476	8.443817122205948	8.547535330980965	0.0921505589389076	8.602212425777124	9.092261304941733	9.090216748266663	8.928230159661839	0.11526543075187635	0	0	1	1	1	1	1	1	0	1	1	8
01111000110	9.313200077900753	9.487786833374393	9.404871033995953	9.4019526484237	0.03565230597372455	9.267700719465081	9.190205447604	9.417910434173383	9.291938867080821	0.047263456773393143	0	1	1	1	1	0	0	0	1	1	0	6
01100101001	8.135975218301239	8.676224710105634	8.306369239129955	8.372856389178942	0.11275547598672268	8.559535533004036	9.018199226685413	9.07915230913656	8.885629022942004	0.11596087177723384	0	1	1	0	0	1	0	1	0	0	1	5
01100000101	8.023167267473152	8.589756384406574	8.071212288559432	8.228045313479718	0.1282596683399763	7.979303148395066	8.901166695207914	8.750599060947481	8.543689634850153	0.2018938387253456	0	1	1	0	0	0	0	0	1	0	1	4
11110010101	9.5533561136955	9.589712402153085	9.591845505411037	9.578304673753207	0.008831388330759344	9.475279482092283	9.452371864010606	9.397761813070296	9.441804386391063	0.016258336016129506	1	1	1	1	0	0	1	0	1	0	1	7
11011011000	9.498102102952949	9.54532775129262	9.529745680089855	9.524391844778473	0.009823976873629162	9.406376209981168	9.46999093093332	9.39129958417397	9.422555575029486	0.017050957469328804	1	1	0	1	1	0	1	1	0	0	0	6
10000111000	9.13645789125206	9.242613977421057	9.106554587127645	9.16187548526692	0.029190694824098473	9.362965773614931	9.385990653437316	9.333619491241409	9.36085863943122	0.010716145671280593	1	0	0	0	0	1	1	1	0	0	0	4
10000000101	8.618477433819217	8.825301186585293	8.62697840791333	8.690252342772611	0.04777849813024915			7.0	7.0	0.0	1	0	0	0	0	0	0	0	1	0	1	3
11110110001	9.484111316562265	9.510388844511489	9.474456834278099	9.489652331783951	0.007591711237904237	9.968333750276118	9.937613163300613	9.942902399952901	9.949616437843211	0.006705064561263603	1	1	1	1	0	1	1	0	0	0	1	7
00101110001	8.16801090527244	8.535537435285308	7.8806391634831465	8.194729168013632	0.1340138896876582	9.167386286331551	9.20992735200261	9.360025177090957	9.245779605141706	0.04131479476655622	0	0	1	0	1	1	1	0	0	0	1	5
01110001010	7.489134396372973	7.828677893903268		7.65890614513812	0.09801776485035146	7.0	7.0	7.0	7.0	0.0	0	1	1	1	0	0	0	1	0	1	0	5
00001111000	8.313046359832832	8.602016457941533	8.234466882213638	8.383176566662668	0.07901672511451337	9.08653635107817	9.293993324794394	9.367621443415787	9.24938370642945	0.05950451078365293	0	0	0	0	1	1	1	1	0	0	0	4
11101100101	9.266035066572043	9.394941661367962	9.377974540217796	9.346317089385932	0.028594501774375836	10.012375908164746	9.901576109755489	9.932321590302386	9.94875786940754	0.023351524878830663	1	1	1	0	1	1	0	0	1	0	1	7
11011100100	9.339224095300684	9.413075965924255	9.36415499117293	9.372151684132623	0.01533778027382533	9.907237288405296	9.802829149824047	9.831737521051855	9.847267986427065	0.022008185471843224	1	1	0	1	1	1	0	0	1	0	0	6
10101100101	9.000698255586205	9.067662723579176	8.959913668175457	9.009424882446945	0.0222095334161308	9.396925027264153	9.316338519576657	9.298489540287036	9.337251029042616	0.021410223660782463	1	0	1	0	1	1	0	0	1	0	1	6
00100001110	7.0		7.0	7.0	0.0	7.0	7.0	7.0	7.0	0.0	0	0	1	0	0	0	0	1	1	1	0	4
10111111111	9.3507201464203	9.341927602324377	9.423710004475415	9.372119251073364	0.018328173146657384	10.02874184133283	9.99676270222152	9.9045822326384	9.97669559206425	0.026318304119428728	1	0	1	1	1	1	1	1	1	1	1	10
00010101111	7.0		7.0	7.0	0.0	7.5665504229812575			7.5665504229812575	0.0	0	0	0	1	0	1	0	1	1	1	1	6
11100101101	9.321327554751463	9.356796011317924	9.368410038210829	9.348844534760072	0.010013403906455649	9.975816401126755	9.966800050020131	9.958057587663085	9.96689134626999	0.0036251463226396963	1	1	1	0	0	1	0	1	1	0	1	7
10011101010	8.46832478584526	8.640587334813969	8.52833661595493	8.545749578871385	0.03569781716586839	8.557942721678362	9.02766939622137	9.15170967675428	8.912440598218003	0.12786585167797737	1	0	0	1	1	1	0	1	0	1	0	6
01001000101	8.343185572612771	8.741390507192275	8.832653679897428	8.63907658656749	0.10625900807101549	8.410162534210329	9.223914902839953	9.03061458844153	8.888230675163937	0.17356704441068374	0	1	0	0	1	0	0	0	1	0	1	4
11110011110	9.544359015703431	9.597118173451353	9.626689730238288	9.589388973131024	0.017026411063153467	9.440384213350136	9.492476843217712	9.462302452546362	9.46505450303807	0.010677787364912967	1	1	1	1	0	0	1	1	1	1	0	8
11101000000	9.282367214857212	9.323132204570506	9.152777374588053	9.25275893133859	0.03631501035907158	8.787928043990373	9.169681053647396	9.207592916796974	9.055067338144916	0.09476451445812763	1	1	1	0	1	0	0	0	0	0	0	4
10000011100	9.410910498147725	9.396720159876311	9.34660527930107	9.384745312441703	0.013792135567300018	7.71866479626665	8.641835746849718		8.180250271558185	0.2664964984135885	1	0	0	0	0	0	1	1	1	0	0	4
01111001110	8.512907920048663	8.598182270147742	8.712114437476693	8.607734875891033	0.04080287643826111	8.352213363286197	9.13663498524786	8.795333503648711	8.761393950727589	0.16056838636004162	0	1	1	1	1	0	0	1	1	1	0	7
00001000000	7.0	7.0	7.0	7.0	0.0	7.0	7.0	7.0	7.0	0.0	0	0	0	0	1	0	0	0	0	0	0	1
01111110010	9.323157291111167	9.39685207240124	9.425849283376518	9.381952882296309	0.02161365586149137	9.241710399057975	9.283082441602426	9.370860793178837	9.298551211279745	0.026924023355518203	0	1	1	1	1	1	1	0	0	1	0	7
00001010100	8.674201658344014	8.923437030775675	8.605396073604892	8.734344920908194	0.06831351944457371	7.0	7.0	7.0	7.0	0.0	0	0	0	0	1	0	1	0	1	0	0	3
00011001101	7.0	7.0	7.0	7.0	0.0	7.0	7.0	7.0	7.0	0.0	0	0	0	1	1	0	0	1	1	0	1	5
10110011111	9.466287742178881	9.511533015648276	9.54042703760008	9.506082598475745	0.015255813465167516	8.689249874466329	9.155093617441166	9.020754069832094	8.955032520579863	0.09788776714881736	1	0	1	1	0	0	1	1	1	1	1	8
10010000101	8.899648341567156	9.030679949361364	8.852186550950007	8.927504947292844	0.03774247426314747						1	0	0	1	0	0	0	0	1	0	1	4
00001111011	8.429012869645673	8.788563819917737	8.352768063024412	8.523448250862607	0.09501580250213418	9.228172650159244	9.318940879477251	9.390519335069378	9.312544288235292	0.03321595703364342	0	0	0	0	1	1	1	1	0	1	1	6
00001000100	7.0	7.0	7.0	7.0	0.0	7.0	7.0	7.0	7.0	0.0	0	0	0	0	1	0	0	0	1	0	0	2
11100111101	9.392778313376617	9.425277911049664	9.420324596613446	9.412793607013242	0.007148342645866198	10.104564244400978	10.028339145950472	10.061219012015655	10.064707467455703	0.015608189087063695	1	1	1	0	0	1	1	1	1	0	1	8
11001011100	9.492004338809037	9.535637430075868	9.554172662681776	9.527271477188894	0.013030202090187248	9.41759097642219	9.431020624331088	9.345494923753435	9.398035508168904	0.018777085409165357	1	1	0	0	1	0	1	1	1	0	0	6
01110101000	8.30179136381423	8.75191404220905	8.435696199859677	8.496467201960986	0.0943596333393589	7.705718479437051			7.705718479437051	0.0	0	1	1	1	0	1	0	1	0	0	0	5
01100101000	8.093459767294362	8.529470209821714	7.921831068442876	8.181587015186318	0.1278874116815648	8.280859356493984	8.902531817399367	8.667944142443224	8.61711177211219	0.12816467894024877	0	1	1	0	0	1	0	1	0	0	0	4
00110101011	7.0	7.0	7.0	7.0	0.0	7.0	7.0	7.0	7.0	0.0	0	0	1	1	0	1	0	1	0	1	1	6
00001000001	7.0	7.0	7.0	7.0	0.0	7.0	7.0	7.0	7.0	0.0	0	0	0	0	1	0	0	0	0	0	1	2
11110011101	9.619012688088366	9.597147098299637	9.59715285866208	9.604437548350027	0.00515309020701047	9.452026587632384	9.52534683075992	9.543304147559422	9.506892521983909	0.019741324553918138	1	1	1	1	0	0	1	1	1	0	1	8
00101001001	7.0	7.0	7.0	7.0	0.0	7.0	7.0	7.0	7.0	0.0	0	0	1	0	1	0	0	1	0	0	1	4
11111000101	9.469638126132592	9.553672760705402	9.571770520627716	9.53169380248857	0.02224882938699555	9.191421829182264	9.287607962265179	9.18804062581189	9.222356805753112	0.023080089556728824	1	1	1	1	1	0	0	0	1	0	1	7
00100110011	8.284381431149379	8.789456333990831	7.965031610172564	8.346289791770925	0.1697024430912541	8.634106941042182	9.14714338347277	9.093006416527038	8.95808558034733	0.115075570707566	0	0	1	0	0	1	1	0	0	1	1	5
10000101001	8.155310367638505	8.359521859058454	8.103910946778884	8.206247724491947	0.055196913200996026	8.806200133780543	9.100899500996912	9.052138410048736	8.986412681608728	0.06448750885980309	1	0	0	0	0	1	0	1	0	0	1	4
10101101000	7.894659208136388	7.9537969927359935	7.59876485533164	7.8157403520680075	0.07765639491786047	8.49964659493879	9.131071693354238	9.106192645941404	8.91230364474481	0.14598465805008357	1	0	1	0	1	1	0	1	0	0	0	5
00111100101	7.0	7.0	7.0	7.0	0.0	7.527203966052053			7.527203966052053	0.0	0	0	1	1	1	1	0	0	1	0	1	6
11100000111	9.418510164189069	9.501174271147427	9.500837648399914	9.473507361245469	0.019444566900825144	9.771351801390189	9.699327694248511	9.649642163890913	9.70677388650987	0.024982971865673238	1	1	1	0	0	0	0	0	1	1	1	6
11001101100	9.301831829608918	9.331446558731043	9.393123402839613	9.34213393039319	0.019014042050186235	9.93851660986374	9.895754876671562	9.851640596165328	9.895304027566876	0.017734208410667977	1	1	0	0	1	1	0	1	1	0	0	6
11000101100	9.313731370525383	9.313533680899416	9.338100343618473	9.321788465014423	0.005767261163845033	9.880430359969939	9.921761612618356	9.825298639618003	9.875830204068768	0.019757476921210652	1	1	0	0	0	1	0	1	1	0	0	5
10001101101	9.032324278739154	9.06265997722148	8.945966921115271	9.013650392358635	0.024717918130599446	9.31316031175109	9.346414223309024	9.320532056409618	9.326702197156578	0.007129850817790399	1	0	0	0	1	1	0	1	1	0	1	6
00011010110	8.736382320822656	8.996456126285471	8.771288463601566	8.834708970236564	0.05762843130544364	7.5774077733460485	8.416507555545135		7.996957664445592	0.24222724256479933	0	0	0	1	1	0	1	0	1	1	0	5
00011001011	7.0	7.0	7.0	7.0	0.0	7.0	7.0	7.0	7.0	0.0	0	0	0	1	1	0	0	1	0	1	1	5
11110101110	9.367094770730075	9.426487361801943	9.427532286644917	9.407038139725644	0.014123724202083146	9.916676937918485	9.955634338228617	9.971188321594257	9.94783319924712	0.01146382763753215	1	1	1	1	0	1	0	1	1	1	0	8
00110111011	8.775769887647895	9.041685528780754	8.70331728490851	8.840257567112387	0.07273497865233391	8.907675536591793	9.102785445346019	9.244127939947047	9.08486297396162	0.0689697592744762	0	0	1	1	0	1	1	1	0	1	1	7
11001011000	9.44848253877022	9.528090641329532	9.427560189477367	9.468044456525705	0.021654847059817246	9.53495024482802	9.54752442211794	9.442733197516716	9.508402621487559	0.02335908965522934	1	1	0	0	1	0	1	1	0	0	0	5
11111101100	9.386287464768929	9.376785282771383	9.378326861516245	9.380466536352186	0.002081927071300682	9.965058330219069	9.936383322570693	9.876089163900724	9.925843605563495	0.018539113448729456	1	1	1	1	1	1	0	1	1	0	0	8
10011011101	9.449218001689175	9.440153454722717	9.45603744373648	9.448469633382791	0.003253083616325776	8.362707403331454	9.295587850405497	8.837381325667764	8.831892193134905	0.19043331294061921	1	0	0	1	1	0	1	1	1	0	1	7
11001111010	9.428832970361707	9.413242959085323	9.397914857387788	9.413330262278272	0.006311208862711921	10.025357031356014	9.985694290752434	10.02352655048149	10.011525957529981	0.009140513492483198	1	1	0	0	1	1	1	1	0	1	0	7
11011110000	9.364106504404557	9.400380823340203	9.438717409718253	9.401068245821003	0.015231826385251458	9.73717562083114	9.737900447658768	9.699638285825722	9.724904784771878	0.008934281543858039	1	1	0	1	1	1	1	0	0	0	0	6
10111100011	8.660040893818476	8.835971608785998	8.549183350741744	8.681731951115404	0.05904059720933335	8.890515919101471	9.096409525794874	9.119951667377807	9.035625704091382	0.0515286253494789	1	0	1	1	1	1	0	0	0	1	1	7
10011101100	9.141603378120983	9.138980033475264	9.067851487698901	9.116144966431717	0.017082718120809495	9.201850230573074	9.219065678681249	9.162456683534073	9.194457530929464	0.011847176800886003	1	0	0	1	1	1	0	1	1	0	0	6
10001101110	9.128102138330815	9.148252436516731	9.090019465397098	9.122124680081548	0.012073160568635288	9.474828089289963	9.524743029884556	9.388550766392699	9.462707295189071	0.028128480217228184	1	0	0	0	1	1	0	1	1	1	0	6
10001001111	9.027907960681627	8.987963398526269	8.936299853581392	8.984057070929763	0.01875035941029069	7.9127560715813745	9.025195723133146		8.46897589735726	0.32113366614031447	1	0	0	0	1	0	0	1	1	1	1	6
11011100101	9.386477445194831	9.444409419983836	9.449657361364899	9.426848075514522	0.014313315866071631	9.980150908219338	9.909445477112149	9.895279035507064	9.928291806946184	0.018561594784132572	1	1	0	1	1	1	0	0	1	0	1	7
10001010111	9.440258727903915	9.421450253940568	9.421645661490253	9.42778488111158	0.004410351202505087	8.697772675740497	9.238751388579775	9.003369189971322	8.979964418097198	0.11073642087269692	1	0	0	0	1	0	1	0	1	1	1	6
00110001110	7.2733912282246385	7.545289968861541		7.409340598543089	0.07849040554951787	7.0	7.0	7.0	7.0	0.0	0	0	1	1	0	0	0	1	1	1	0	5
00101111011	8.473072304046458	8.848456799544797	8.474644544859562	8.598724549483604	0.0882942670144961	9.229640796438504	9.272692103348264	9.395811994703902	9.29938163149689	0.035207634039217284	0	0	1	0	1	1	1	1	0	1	1	7
00100000101	7.0	7.0	7.0	7.0	0.0	7.0	7.0	7.0	7.0	0.0	0	0	1	0	0	0	0	0	1	0	1	3
11001011010	9.424304440880144	9.50090161987332	9.501727174814473	9.47564441185598	0.01815220303475531	9.915632168896037	9.802882235479935	9.640335883614213	9.786283429330062	0.05650022337226293	1	1	0	0	1	0	1	1	0	1	0	6
11100100110	9.340635780280387	9.361559100537724	9.437833704801053	9.380009528539722	0.020885293282091773	10.04656189734876	9.967609190923511	10.012575584228767	10.008915557500346	0.016168020440092145	1	1	1	0	0	1	0	0	1	1	0	6
00000101010	7.0	7.0	7.0	7.0	0.0	7.0	7.0	7.0	7.0	0.0	0	0	0	0	0	1	0	1	0	1	0	3
00001001000	7.0	7.0	7.0	7.0	0.0	7.0	7.0	7.0	7.0	0.0	0	0	0	0	1	0	0	1	0	0	0	2
11110111000	9.44833788180152	9.42041819824285	9.443077720615381	9.43727793355325	0.006056750090857511	9.981984547128093	9.943818533546562	9.95755903922668	9.961120706633778	0.007891717749382247	1	1	1	1	0	1	1	1	0	0	0	7
11011111110	9.484052915729508	9.453180461009957	9.511523587113013	9.482918987950825	0.011915986705715411	10.06723198601908	10.03582893760592	10.086477848681564	10.063179590768856	0.01043746839304721	1	1	0	1	1	1	1	1	1	1	0	9
11111110010	9.384962684511844	9.398842146637495	9.417126074271057	9.4003103018068	0.006585812021581105	9.889974067673217	9.870254145148868	9.89346681680607	9.88456500987605	0.0051096389477155646	1	1	1	1	1	1	1	0	0	1	0	8
10110111101	9.34781012859414	9.373732107355284	9.41549174083832	9.379011325595915	0.01394096342866957	9.988606742221704	9.969543580551584	9.963362452009989	9.973837591594425	0.005371955652589914	1	0	1	1	0	1	1	1	1	0	1	8
10100100001	8.109209420178107	8.442940315910013	7.987699651905767	8.179949795997961	0.09623250154279779	8.895296481611489	9.122109408507498	9.11168909798826	9.043031662702417	0.05227556554262237	1	0	1	0	0	1	0	0	0	0	1	4
10011100001	8.438688262477683	8.618829715130854	8.191935606265899	8.416484527958145	0.08749228481782612	8.361817191219197	9.02498337283023	8.950877712071962	8.779226092040462	0.1483495619040368	1	0	0	1	1	1	0	0	0	0	1	5
11110111010	9.430898275511801	9.489081829010038	9.50252215880946	9.474167421110435	0.01554201207966137	10.038132074518137	9.995457861898814	10.056524270351607	10.030038068922854	0.012789391797261929	1	1	1	1	0	1	1	1	0	1	0	8
10110000010	8.566424748805167	8.760946763379607	8.47156056440648	8.599644025530418	0.060226978033989735			7.0	7.0	0.0	1	0	1	1	0	0	0	0	0	1	0	4
01111000100	8.3431650273446	8.809213241693785	8.634316657998419	8.595564975678935	0.0961132181218748	8.130387787663915	8.86131715959804		8.495852473630977	0.21100113482238533	0	1	1	1	1	0	0	0	1	0	0	5
01010011010	8.802452667077162	9.265074002017217	9.108336438303102	9.05862103579916	0.09605410005133068	7.527181824907521			7.527181824907521	0.0	0	1	0	1	0	0	1	1	0	1	0	5
00001011010	8.309752703947908	8.788844321267698	8.347462070404347	8.482019698539984	0.10875163670311616	7.0	7.0	7.0	7.0	0.0	0	0	0	0	1	0	1	1	0	1	0	4
00001000101	7.0	7.0	7.0	7.0	0.0	7.0	7.0	7.0	7.0	0.0	0	0	0	0	1	0	0	0	1	0	1	3
00000111101	8.715290585943281	9.067441699317742	8.577433399489744	8.786721894916923	0.10316157020369168	9.423986738587988	9.463989651433822	9.507111646657485	9.465029345559765	0.016971782013571867	0	0	0	0	0	1	1	1	1	0	1	5
11100110011	9.372226481013467	9.393645796038367	9.41083569615138	9.392235991067738	0.007896819359008156	9.96480799094085	9.944137366633203	9.993910940049274	9.967618765874443	0.01020847274283081	1	1	1	0	0	1	1	0	0	1	1	7
00011101101	7.0	7.0	7.0	7.0	0.0	7.5602373851071	8.212885263059032		7.8865613240830665	0.18840321401079313	0	0	0	1	1	1	0	1	1	0	1	6
11101111111	9.427594509326855	9.432789253222026	9.45434613727331	9.43824329994073	0.0057911191873670324	10.156645181494499	10.047263816100472	10.102201930263599	10.102036975952856	0.022327453882716102	1	1	1	0	1	1	1	1	1	1	1	10
00010110010	8.008122941338913	8.42523786551108	7.8459693265594845	8.093110044469826	0.122000762175705	7.632000815710871			7.632000815710871	0.0	0	0	0	1	0	1	1	0	0	1	0	4
00100100010	7.0	7.0	7.0	7.0	0.0	7.474560800025619		7.0	7.23728040001281	0.13699390282081778	0	0	1	0	0	1	0	0	0	1	0	3
11100000101	9.411911226091933	9.521832437465696	9.480485575551274	9.471409746369634	0.02266585605402097	9.233368248448569	9.258510967681358	9.206097907899359	9.232659041343096	0.010701708897544519	1	1	1	0	0	0	0	0	1	0	1	5
11110101100	9.34999816669133	9.375810308746207	9.391760204557894	9.37252289333181	0.008603509717669294	9.89047435274077	9.85101737797181	9.80146167858108	9.847651136431221	0.018208572737618733	1	1	1	1	0	1	0	1	1	0	0	7
10001101100	8.964890186446024	8.94971933235816	8.838835356465296	8.91781495842316	0.028094696556188292	9.30089333529882	9.277538327718283	9.286244609995148	9.288225424337417	0.004818485478959232	1	0	0	0	1	1	0	1	1	0	0	5
11111101011	9.365807076404613	9.407902281640428	9.394007048343886	9.389238802129642	0.008756461470737819	9.667652362079275	9.662517467318127	9.624925305781096	9.651698378392831	0.009523565936288595	1	1	1	1	1	1	0	1	0	1	1	9
11010101100	9.384401186371369	9.42330859078359	9.344843364383713	9.38418438051289	0.01601683068983561	9.82247073498296	9.814021265044794	9.793611843748268	9.810034614592007	0.006057074888074847	1	1	0	1	0	1	0	1	1	0	0	6
11001001000	9.349946969444687	9.30949318329127	9.221449665445107	9.293629939393687	0.026822320195457175	8.619217572891996	9.173791051505415	9.089474129981225	8.960827584792879	0.12199753138692324	1	1	0	0	1	0	0	1	0	0	0	4
10100100010	8.185151035517181	8.523980474641585	8.262587100288266	8.323906203482345	0.0724814591427052	8.61526611770455	9.117515266851132	9.09928311400494	8.944021499520208	0.11629214551717065	1	0	1	0	0	1	0	0	0	1	0	4
10011100110	9.231547568738105	9.190011210582426	9.146331349537359	9.189296709619297	0.017396522101831693	9.225418408826696	9.311111216112248	9.232281529106553	9.256270384681832	0.01943970678353292	1	0	0	1	1	1	0	0	1	1	0	6
00011111001	8.809875547695396	9.027583270892318	8.746712443094399	8.861390420560705	0.0601559668302859	9.308690191280306	9.251657387886087	9.414067877472856	9.324805152213083	0.03363792689894399	0	0	0	1	1	1	1	1	0	0	1	6
11110001100	9.481333907169905	9.41377789806001	9.463403933111257	9.452838579447059	0.014286786524916785	8.573247422150668	9.172607916046553	9.066170140124594	8.937341826107273	0.13054743791701998	1	1	1	1	0	0	0	1	1	0	0	6
10011111101	9.312945793864898	9.353602960582203	9.396808649973543	9.354452468140215	0.017121068434306174	9.902970782649712	9.892886265232363	9.826202767951354	9.874019938611143	0.017030784530352307	1	0	0	1	1	1	1	1	1	0	1	8
10111011101	9.492034128654009	9.45602527967471	9.528929726937859	9.492329711755525	0.014881924913093572	8.785226015929467	9.195190848205126	9.12767045727081	9.036029107135134	0.08973701736808444	1	0	1	1	1	0	1	1	1	0	1	8
01111101101	9.020906816948264	9.24673983461182	9.087731425003128	9.118459358854404	0.047360835447715056	9.059424000625324	9.167180793991683	9.217065304635916	9.147890033084307	0.03289324975033926	0	1	1	1	1	1	0	1	1	0	1	8
11001101101	9.33514331391876	9.358576938654581	9.405507691382462	9.366409314651934	0.014627576635055583	9.940403012820346	9.96141520973808	9.881755476585367	9.927857899714597	0.016854540281564964	1	1	0	0	1	1	0	1	1	0	1	7
01000001000	7.0	7.0	7.0	7.0	0.0	7.0		7.0	7.0	0.0	0	1	0	0	0	0	0	1	0	0	0	2
10101011011	9.39560576365078	9.444156436539387	9.434264036049006	9.424675412079724	0.010474160600436025	9.005384484377887	9.228355577873506	9.124478926539924	9.119406329597105	0.04554910457126882	1	0	1	0	1	0	1	1	0	1	1	7
10010100010	8.490515900840936	8.565473435190746	8.509417332272506	8.521802222768063	0.01591486267293851	8.336367018238622	9.07293463500967	8.922546176051322	8.777282609766537	0.1588810305890729	1	0	0	1	0	1	0	0	0	1	0	4
00111101010	7.0	7.0	7.0	7.0	0.0	7.0	7.0	7.0	7.0	0.0	0	0	1	1	1	1	0	1	0	1	0	6
00000001111	7.3553331800292865			7.3553331800292865	0.0	7.0	7.0	7.0	7.0	0.0	0	0	0	0	0	0	0	1	1	1	1	4
11000010110	9.48891542997836	9.531436488042509	9.576494273273664	9.532282063764844	0.017879456073766724	9.654084385905966	9.639287398406417	9.607101145113015	9.633490976475132	0.00980692875179079	1	1	0	0	0	0	1	0	1	1	0	5
01101000101	8.329255645428944	8.844751699886348	8.552698859315909	8.575568734877066	0.10553539607356466	8.561974237869135	9.026876129889596	8.961385391572813	8.850078586443848	0.10273375455683495	0	1	1	0	1	0	0	0	1	0	1	5
00110011011	8.729793368304964	9.046713154275267	8.647566763460157	8.80802442868013	0.08604217418486237	7.0	7.0	7.0	7.0	0.0	0	0	1	1	0	0	1	1	0	1	1	6
10100111001	9.234616273045424	9.25098069446669	9.232323201461838	9.239306722991317	0.00415382859194843	9.580178852619145	9.593777214098056	9.569093767111724	9.58101661127631	0.005047185989200715	1	0	1	0	0	1	1	1	0	0	1	6
01001001110	8.511245383648491	8.637162610854412	8.73234142158054	8.626916472027814	0.04527619318868145	8.523792235680718	9.015995842027003	9.061876003950905	8.867221360552875	0.12178116998150332	0	1	0	0	1	0	0	1	1	1	0	5
01001001011	7.697957366478821	7.964527314228269		7.831242340353545	0.07695211554550398	7.565130918466152			7.565130918466152	0.0	0	1	0	0	1	0	0	1	0	1	1	5
00110000101	7.0	7.0	7.0	7.0	0.0	7.0	7.0	7.0	7.0	0.0	0	0	1	1	0	0	0	0	1	0	1	4
11111101010	9.353927101601043	9.393659274728273	9.422157187175534	9.389914521168285	0.013990196143456998	9.688557501433301	9.59350364096577	9.513815994619591	9.598625712339555	0.03571490179707924	1	1	1	1	1	1	0	1	0	1	0	8
10111111001	9.295471574346596	9.328078961018207	9.316164977833957	9.313238504399587	0.0067358939206257845	9.399147575933123	9.457714277956418	9.449472027722654	9.435444627204065	0.012942762587981105	1	0	1	1	1	1	1	1	0	0	1	8
10010111001	9.403492488588396	9.356653417236585	9.328484059844882	9.362876655223287	0.015468315001544629	9.44763129138105	9.437376152595995	9.357179467159378	9.414062303712141	0.020219770805622587	1	0	0	1	0	1	1	1	0	0	1	6
11000111101	9.449149502850773	9.441694733712666	9.489619127390837	9.460154454651425	0.0105278883642138	10.145388114789617	10.072126628129782	10.123757925192166	10.113757556037188	0.015366722131113696	1	1	0	0	0	1	1	1	1	0	1	7
10101111100	9.244578372717582	9.243095128123226	9.273882297444887	9.253851932761897	0.007088272422715914	9.949285908977037	9.956163218504118	9.88300487414177	9.92948466720764	0.01649294151633513	1	0	1	0	1	1	1	1	1	0	0	7
10011000101	8.90558211578494	8.983354315703043	8.668723335506918	8.852553255664967	0.06690441992002627						1	0	0	1	1	0	0	0	1	0	1	5
10010010101	9.488116279378136	9.467137351473985	9.503614122338837	9.486289251063653	0.007473756613735858						1	0	0	1	0	0	1	0	1	0	1	5
00111110010	8.2585730110728	8.551363289960781	8.01733225750632	8.275756186179967	0.10917778470318269	7.898277067018667	8.484895650723045	8.083564215301907	8.155578977681207	0.12241999781302261	0	0	1	1	1	1	1	0	0	1	0	6
11000110001	9.355576501014973	9.392630319090754	9.457634853256826	9.401947224454185	0.021091389869422498	9.974605307549863	9.965491006910408	10.012637522562176	9.984244612340815	0.01020935544949881	1	1	0	0	0	1	1	0	0	0	1	5
10001001100	8.400557509764711	8.019297523555588	8.339842852857366	8.253232628725888	0.08363192419178596	7.0	7.0	7.0	7.0	0.0	1	0	0	0	1	0	0	1	1	0	0	4
00111000101	7.0	7.495294535547882		7.2476472677739405	0.14297921671336017	7.0	7.0	7.0	7.0	0.0	0	0	1	1	1	0	0	0	1	0	1	5
11110000110	9.45492914711634	9.523867295419297	9.488239602672989	9.489012015069543	0.014074590216313443	9.668105563645039	9.58598264768584	9.599771682016208	9.617953297782362	0.01795351263361134	1	1	1	1	0	0	0	0	1	1	0	6
11011111111	9.497105861240957	9.480929507437864	9.546417299712273	9.508150889463698	0.01392633728213611	10.117497620644336	10.052625571255598	10.11871075831028	10.096277983403404	0.015435444818612648	1	1	0	1	1	1	1	1	1	1	1	10
11000100010	9.263225119994337	9.383931737173619	9.296910351689457	9.314689069619137	0.025428278110972567	9.455730663947277	9.541095563562116	9.582642447582655	9.526489558364018	0.02641543660836559	1	1	0	0	0	1	0	0	0	1	0	4
00000101000	7.0	7.0	7.0	7.0	0.0	7.0	7.0	7.0	7.0	0.0	0	0	0	0	0	1	0	1	0	0	0	2
11001100101	9.354651631072578	9.384632407754713	9.370991784520973	9.370091941116089	0.006128064284244625	9.880909590633236	9.920773981227796	9.887064466064707	9.896249345975248	0.00876131576493314	1	1	0	0	1	1	0	0	1	0	1	6
11110000101	9.517228159366423	9.567586116648757	9.573989802276161	9.55293469276378	0.012691658631072657	9.18624465451905	9.299785269127367	9.2393872628883	9.241805728844907	0.023192148544266798	1	1	1	1	0	0	0	0	1	0	1	6
10110000100	8.771724421403125	8.919102993500037	8.70157762307759	8.797468345993584	0.04532545997991469			7.0	7.0	0.0	1	0	1	1	0	0	0	0	1	0	0	4
10011100000	8.125229078945196	8.503008037352163	8.182162831173898	8.270133315823752	0.08314980455069336	7.504879963475028			7.504879963475028	0.0	1	0	0	1	1	1	0	0	0	0	0	4
10010001011	8.607751016871902	8.69687064322024	8.601098366225944	8.635240008772696	0.021831993980392917			7.0	7.0	0.0	1	0	0	1	0	0	0	1	0	1	1	5
10010000100	8.652692405232768	8.741859334652906	8.538683321273119	8.644411687052932	0.041576337066906756			7.0	7.0	0.0	1	0	0	1	0	0	0	0	1	0	0	3
10001000100	8.412736181532418	8.560349911766549	8.429043672549652	8.467376588616206	0.03303915020858542			7.0	7.0	0.0	1	0	0	0	1	0	0	0	1	0	0	3
00010101000	7.0	7.0	7.0	7.0	0.0	7.0	7.0	7.0	7.0	0.0	0	0	0	1	0	1	0	1	0	0	0	3
10011100111	9.32028025593485	9.228209426683044	9.27964849640272	9.276046059673538	0.018836987385503202	9.265604680895702	9.341218300774539	9.300079555825787	9.30230084583201	0.01545453264021117	1	0	0	1	1	1	0	0	1	1	1	7
10000011010	9.387498777125733	9.371470439979646	9.349147670774624	9.369372295960002	0.007863454455410708	8.503901042921248	9.052732425699944	9.196593688431264	8.917742385684152	0.14923276475778538	1	0	0	0	0	0	1	1	0	1	0	4
00000110001	8.170037937437716	8.572121999128209	8.026506631037321	8.256222189201083	0.11546632006292794	8.917880511223698	9.179246540803398	9.390996295471178	9.162707782499425	0.09675121379144276	0	0	0	0	0	1	1	0	0	0	1	3
10110111010	9.250594537481778	9.29325588675519	9.318123377966296	9.287324600734422	0.01394286669287094	9.449181217882105	9.445259200923056	9.426010657993167	9.440150358932776	0.005062837005292332	1	0	1	1	0	1	1	1	0	1	0	7
10101111011	9.173139627322296	9.251044074174802	9.266748468425718	9.230310723307605	0.020465652778163475	9.739323264440694	9.809967207728924	9.681349472735803	9.743546648301807	0.02629641346622164	1	0	1	0	1	1	1	1	0	1	1	8
10010101111	9.234610433038672	9.246653821469904	9.232337701994311	9.237867318834295	0.0031409472569106063	9.499341835665646	9.46727020904593	9.387251551700668	9.451287865470748	0.02356775487629131	1	0	0	1	0	1	0	1	1	1	1	7
00111001111	8.077879511501068	8.389874052024396	8.412186609902708	8.293313391142723	0.07630342929477878			7.0	7.0	0.0	0	0	1	1	1	0	0	1	1	1	1	7
11101000010	9.425656851916195	9.490708890255073	9.442352602239186	9.452906114803485	0.013792959518019383	9.376299313030662	9.38579960886514	9.344297409398504	9.368798777098101	0.008876952082019674	1	1	1	0	1	0	0	0	0	1	0	5
01111101100	8.882959214823721	9.070606665030082	8.922378474189236	8.958648118014347	0.040392876206986256	9.005085462244006	9.261553838717404	9.306920143278518	9.19118648141331	0.06644511193367673	0	1	1	1	1	1	0	1	1	0	0	7
10111111100	9.341508188928096	9.261583371695385	9.357016832880609	9.320036131168031	0.020907228920425958	9.914591251124335	9.916474824803693	9.784616864309713	9.87189431341258	0.030859633298423658	1	0	1	1	1	1	1	1	1	0	0	8
00111100000	7.0	7.0	7.0	7.0	0.0	7.0	7.0	7.0	7.0	0.0	0	0	1	1	1	1	0	0	0	0	0	4
00011101100	7.0	7.0	7.0	7.0	0.0	7.259942473827798		7.0	7.1299712369138994	0.07503892861914822	0	0	0	1	1	1	0	1	1	0	0	5
11101000101	9.496547731896008	9.520785496461237	9.525007571478106	9.514113599945118	0.0062699849760724105	9.182902742502655	9.259898931618995	9.270669981149734	9.237823885090462	0.019541634204781857	1	1	1	0	1	0	0	0	1	0	1	6
10111100100	9.081306311125822	9.119327737398221	9.126816798264981	9.109150282263009	0.009962316955096787	9.146099297034556	9.233921898693808	9.241913545815322	9.207311580514562	0.021703203843964805	1	0	1	1	1	1	0	0	1	0	0	6
11111011110	9.555140016310864	9.56562614872416	9.652401421279254	9.591055862104758	0.021794295760094746	9.618911350163653	9.672517372537584	9.562697774607779	9.618042165769673	0.022418937803781982	1	1	1	1	1	0	1	1	1	1	0	9
10100000111	9.327284607747815	9.301807471713667	9.300739942897438	9.309944007452975	0.006134699372999261	8.858030543839046	9.121104166064196	9.085602208546616	9.02157897281662	0.05827544324537463	1	0	1	0	0	0	0	0	1	1	1	5
10001010100	9.393012656701382	9.3857491091816	9.40342113967338	9.394060968518788	0.003626278709537993	7.542101719138817			7.542101719138817	0.0	1	0	0	0	1	0	1	0	1	0	0	4
01000011000	8.640139785372964	9.078022735613304	8.795365229512239	8.837842583499503	0.09063536260672529	7.398313710081826			7.398313710081826	0.0	0	1	0	0	0	0	1	1	0	0	0	3
00000000010	7.0	7.0	7.0	7.0	0.0	7.0	7.0	7.0	7.0	0.0	0	0	0	0	0	0	0	0	0	1	0	1
11001000000	9.304219721711762	9.326319040099028	9.316515835589506	9.3156848658001	0.004520561384544627	8.967583998076242	9.302035202683935	9.286322844171822	9.185314014977331	0.07704597085216454	1	1	0	0	1	0	0	0	0	0	0	3
10111011100	9.451666928449514	9.3421311244273	9.442332494101526	9.412043515659448	0.024791092997273386	8.163006675911676	8.919552502806608	8.819529927310434	8.634029702009572	0.1677786971171831	1	0	1	1	1	0	1	1	1	0	0	7
10001010110	9.380819734564028	9.428045143250356	9.465034376409315	9.424633084741233	0.017232518111285837	8.777377061556175	9.191801957591014	9.193155826882887	9.05411161534336	0.09784083008076488	1	0	0	0	1	0	1	0	1	1	0	5
00111111010	8.33901858840339	8.682910164444811	8.312195415090853	8.444708055979683	0.0843949583946049	8.739782831423781	9.174794115692665	9.29498796044815	9.069854969188198	0.11924928523584244	0	0	1	1	1	1	1	1	0	1	0	7
00111010110	9.01862354224081	9.17212336413316	8.996485805504316	9.06241090395943	0.03905154240441523	7.77878252175132	9.02279187076582		8.40078719625857	0.3591145662639664	0	0	1	1	1	0	1	0	1	1	0	6
01101101010	8.230049081462422	8.641113718545611	8.698296173336626	8.523152991114886	0.10428317591551034	8.538420002270719	9.042863760675539	9.1383977707002	8.906560511215487	0.13161006959476418	0	1	1	0	1	1	0	1	0	1	0	6
01101001100	7.787353054946631	7.844777820518324		7.816065437732478	0.016577101930484138			7.0	7.0	0.0	0	1	1	0	1	0	0	1	1	0	0	5
01100110010	9.332767528804494	9.413760790536156	9.320487128196806	9.355671815845819	0.02068996856450926	9.266623309162057	9.329009115605114	9.494815004127032	9.363482476298067	0.04814764075363563	0	1	1	0	0	1	1	0	0	1	0	5
00101100101	7.0	7.0		7.0	0.0	7.765991629463341	8.298444138836016		8.032217884149679	0.15370579980850305	0	0	1	0	1	1	0	0	1	0	1	5
00000000100	7.0	7.0	7.0	7.0	0.0	7.0	7.0	7.0	7.0	0.0	0	0	0	0	0	0	0	0	1	0	0	1
11000011000	9.419040082544859	9.475047277213108	9.467444930047856	9.45384409660194	0.012402543196655428	9.374425552786649	9.584395927436637	9.478728031675887	9.479183170633057	0.04286032532398465	1	1	0	0	0	0	1	1	0	0	0	4
10001011010	9.376434907336108	9.377963208683504	9.35319315816293	9.36919709139418	0.005666838263159402	8.418792610960724	9.090581814111466	9.125538389600562	8.878304271557584	0.16261852867516072	1	0	0	0	1	0	1	1	0	1	0	5
10000110001	9.25146853351768	9.270211985479877	9.163825770585962	9.228502096527839	0.023184404243908576	9.346781685640774	9.338683745944873	9.323522925542454	9.336329452376035	0.004820088242346055	1	0	0	0	0	1	1	0	0	0	1	4
11101101111	9.352001259142762	9.38471578974259	9.417809873520557	9.384842307468636	0.01343320163272453	10.058402955001505	9.976048659381533	9.984991321184042	10.00648097852236	0.018447725836148295	1	1	1	0	1	1	0	1	1	1	1	9
11010010100	9.483405934174954	9.559161740228443	9.570222747569668	9.537596807324356	0.019291943570531926	9.13829757375473	9.344437545577176	9.208243572346026	9.230326230559312	0.0427963293618023	1	1	0	1	0	0	1	0	1	0	0	5
10011101011	8.7372899748348	8.927192895016063	8.657651719521875	8.774044863124246	0.056533622269664206	8.584225171444832	9.104060887564387	9.102816579257649	8.930367546088956	0.12238007375862259	1	0	0	1	1	1	0	1	0	1	1	7
01100101010	8.194787476085635	8.592729589482339	8.473983069043522	8.420500044870499	0.0834014456406262	8.468242150037565	9.257957669930047	9.179940762059546	8.968713527342386	0.17765854848766172	0	1	1	0	0	1	0	1	0	1	0	5
00000011011	8.4154472114455	8.8947492099793	8.510932502427805	8.607042974617535	0.10357003958515515	7.0	7.0	7.0	7.0	0.0	0	0	0	0	0	0	1	1	0	1	1	4
01001000111	9.075136248265595	9.212083241229973	9.199273324514502	9.16216427133669	0.03087995868766552	9.182914712178817	9.241767492451238	9.330699080542454	9.251793761724171	0.03037391819694908	0	1	0	0	1	0	0	0	1	1	1	5
00101011010	8.529084490802031	8.836955309554792	8.52602003137263	8.630686610576484	0.07292968058519503	7.0	7.0	7.0	7.0	0.0	0	0	1	0	1	0	1	1	0	1	0	5
10110100011	8.738597174194055	8.926451138398937	8.556837686493068	8.74062866636202	0.07545044861559176	8.827737253046443	9.130435148174092	9.181062125963011	9.046411509061182	0.07800063611141218	1	0	1	1	0	1	0	0	0	1	1	6
11010000111	9.455707617284789	9.503875460623142	9.493740696843895	9.484441258250607	0.010367376328172948	9.461379199635607	9.594366375160297	9.627179348433481	9.560974974409795	0.03584378506893904	1	1	0	1	0	0	0	0	1	1	1	6
11000101110	9.324915333468994	9.3318102606441	9.314334378655673	9.323686657589588	0.0035936018637486287	9.982191165028247	9.936783665942055	9.93166039979608	9.950211743588794	0.011354694408791478	1	1	0	0	0	1	0	1	1	1	0	6
10001001101	8.483947066247312	8.625890381569072	8.347859529126454	8.485898992314278	0.05675700579226654		7.0	7.0	7.0	0.0	1	0	0	0	1	0	0	1	1	0	1	5
11100000110	9.435981170727251	9.498074341299164	9.496686209018472	9.476913907014962	0.014474681359801275	9.683971922199039	9.604483317851836	9.512653834625317	9.60036969155873	0.035000388625077816	1	1	1	0	0	0	0	0	1	1	0	5
01101001111	8.329381091179304	8.516963451883184	8.497544841115866	8.44796312805945	0.042112043435769145	8.543068537915008	9.157159303073936	9.076682192942345	8.925636677977096	0.13625217286139393	0	1	1	0	1	0	0	1	1	1	1	7
00100000100	7.0	7.0	7.0	7.0	0.0	7.0	7.0	7.0	7.0	0.0	0	0	1	0	0	0	0	0	1	0	0	2
11000101111	9.33165100652936	9.386278403600768	9.403564566800037	9.373831325643387	0.015324747686661007	10.069206245623832	9.970061698194613	10.008601730551675	10.015956558123372	0.020404168028833526	1	1	0	0	0	1	0	1	1	1	1	7
00101011000	8.827448811757417	9.152062009418467	9.0246843718144	9.00139839766343	0.0667708887016549	7.0	7.0	7.0	7.0	0.0	0	0	1	0	1	0	1	1	0	0	0	4
11101010110	9.522866649281363	9.518028936581318	9.56793406719122	9.536276551017968	0.01123609966237459	9.6948741759658	9.68073063278088	9.67244501345846	9.68268327406838	0.004630090688337939	1	1	1	0	1	0	1	0	1	1	0	7
11010101000	9.30218463686241	9.413413515744226	9.366692224429698	9.360763459012112	0.02280105468634801	9.078920450154396	9.176633311060638	9.04927387255583	9.101609211256955	0.027206590973333753	1	1	0	1	0	1	0	1	0	0	0	5
01111111001	9.364135276059466	9.464174671084297	9.410556349779542	9.412955432307768	0.02043806431215413	9.464781697297743	9.43442398950867	9.438785334387363	9.445997007064591	0.00670079314527164	0	1	1	1	1	1	1	1	0	0	1	8
00101000001	7.0	7.0	7.0	7.0	0.0	7.0	7.0	7.0	7.0	0.0	0	0	1	0	1	0	0	0	0	0	1	3
00000101110	7.0	7.0	7.0	7.0	0.0	7.4528699341198035			7.4528699341198035	0.0	0	0	0	0	0	1	0	1	1	1	0	4
11010010110	9.508813504306117	9.574923088996432	9.534437376584348	9.539391323295632	0.013607752006332996	9.587151485533301	9.586454718584797	9.572893716517116	9.582166640211739	0.0032815572124079402	1	1	0	1	0	0	1	0	1	1	0	6
11000001001	9.3785962662382	9.39723493814272	9.319042234976996	9.364957813119306	0.016673483237853948	8.905372762561788	9.208837975633266	8.975849452360182	9.030020063518412	0.06483777862361764	1	1	0	0	0	0	0	1	0	0	1	4
00111011110	8.733231552308267	8.917807294929121	8.580750272144924	8.74392970646077	0.06890536629893178	7.263031628735286		7.0	7.131515814367643	0.0759306908278515	0	0	1	1	1	0	1	1	1	1	0	7
00101111110	8.963996129821364	9.002086200504518	8.830363466127725	8.93214859881787	0.036816828803154206	9.340875250102439	9.29021531159086	9.270522245190671	9.300537602294655	0.014817211776956513	0	0	1	0	1	1	1	1	1	1	0	7
00100001101	7.0	7.0	7.0	7.0	0.0	7.0	7.0	7.0	7.0	0.0	0	0	1	0	0	0	0	1	1	0	1	4
11011110001	9.48357954716226	9.45774697650703	9.479847055186413	9.473724526285233	0.005700065010940377	9.92343221136714	9.839639297022757	9.949752744220696	9.904274750870199	0.02347516074837503	1	1	0	1	1	1	1	0	0	0	1	7
10100110011	9.216270988579401	9.260807281618996	9.229847117971644	9.235641796056681	0.009318924025954505	9.317718116271514	9.369228554126073	9.276882941110596	9.321276537169394	0.018891906689840705	1	0	1	0	0	1	1	0	0	1	1	6
00011001111	8.24470788371066	8.40026560804062	8.337970105229875	8.327647865660385	0.03196212047611041	7.0		7.0	7.0	0.0	0	0	0	1	1	0	0	1	1	1	1	6
11100100000	9.301641207592247	9.37056892631318	9.295682670131496	9.322630934678974	0.016992225298689947	9.380249453081477	9.315898057895057	9.33083101711185	9.342326176029461	0.013750027421279214	1	1	1	0	0	1	0	0	0	0	0	4
10000011001	9.430179870286235	9.44682649715275	9.433059660524627	9.436688675987872	0.003632144945542924	8.201837654077991	9.134557146880137	9.097183111078897	8.811192637345675	0.21557455259642297	1	0	0	0	0	0	1	1	0	0	1	4
00100001011	7.0	7.0	7.0	7.0	0.0	7.0	7.0	7.0	7.0	0.0	0	0	1	0	0	0	0	1	0	1	1	4
01100011010	8.572981387742297	9.113151949310113	8.847230426355623	8.844454587802678	0.11026622167575198	7.450887723302822			7.450887723302822	0.0	0	1	1	0	0	0	1	1	0	1	0	5
10111011011	9.455355578384117	9.448906552695894	9.515701584592527	9.473321238557512	0.01504143045401343	8.891853828124963	9.178383072205431	9.134397039812358	9.068211313380916	0.06299492666844177	1	0	1	1	1	0	1	1	0	1	1	8
01101001110	8.274548778444448	8.369673863341719	8.43762837930052	8.360617007028894	0.033442136690477034	8.22509932652282	9.212188106451617	9.048556280843512	8.82861457127265	0.21597331300110725	0	1	1	0	1	0	0	1	1	1	0	6
11000101001	9.294323522694034	9.382326241611693	9.338828131889976	9.338492632065234	0.017963871401252524	9.284813239376973	9.37670579429607	9.387225667275596	9.349581566982879	0.022999525819481073	1	1	0	0	0	1	0	1	0	0	1	5
10110101101	9.216776793924634	9.22139139501626	9.183169540166078	9.20711257636899	0.008517387830874664	9.276445321550707	9.387028323626078	9.30998963831203	9.32448776116294	0.023147342401992184	1	0	1	1	0	1	0	1	1	0	1	7
01110101011	8.783003656722817	9.041050041224024	8.833281441175293	8.885778379707377	0.05584790439960902	8.567678551235801	9.164477546169538	9.223261541285783	8.98513921289704	0.14808158930492607	0	1	1	1	0	1	0	1	0	1	1	7
01101101101	8.56668906137735	8.85537754915911	8.79603519225399	8.739367267596817	0.062241064965373724	9.137888247548275	9.147843920827713	9.324115122177462	9.203282430184482	0.04276911550857355	0	1	1	0	1	1	0	1	1	0	1	7
00111101100	7.0	7.0	7.0	7.0	0.0	7.4070249362655876			7.4070249362655876	0.0	0	0	1	1	1	1	0	1	1	0	0	6
00111001100	7.0	7.0	7.0	7.0	0.0	7.0	7.0	7.0	7.0	0.0	0	0	1	1	1	0	0	1	1	0	0	5
00001101000	7.0	7.0	7.0	7.0	0.0	7.285172994795295		7.0	7.142586497397648	0.08232235265533773	0	0	0	0	1	1	0	1	0	0	0	3
01010000001	8.114107793740807	8.868495071889381	8.325944425308894	8.436182430313027	0.1588444494196403		8.80128408955616		8.80128408955616	0.0	0	1	0	1	0	0	0	0	0	0	1	3
00000010110	8.438688163049015	8.867644779760607	8.588570128939466	8.631634357249697	0.08887429378540841	7.431245400925553			7.431245400925553	0.0	0	0	0	0	0	0	1	0	1	1	0	3
00010000000	7.0	7.0	7.0	7.0	0.0	7.0	7.0	7.0	7.0	0.0	0	0	0	1	0	0	0	0	0	0	0	1
11100100001	9.33171701662949	9.449090525802779	9.268160744413928	9.3496560956154	0.03747277759587927	9.554858067080387	9.416264575972805	9.491393860856792	9.487505501303328	0.02832366045481992	1	1	1	0	0	1	0	0	0	0	1	5
11011000101	9.51315099671634	9.603935256911926	9.558418070474694	9.558501441367653	0.01853128295542593	9.205577619948595	9.268728290860182	9.220115960495358	9.231473957101379	0.013501573206622023	1	1	0	1	1	0	0	0	1	0	1	6
00010000010	7.0	7.0	7.0	7.0	0.0	7.0	7.0	7.0	7.0	0.0	0	0	0	1	0	0	0	0	0	1	0	2
11000101101	9.324876528979518	9.360761969469003	9.338059762985672	9.341232753811397	0.0074104893323158295	9.951397842153886	9.918143223510905	9.910664879330334	9.926735314998375	0.008852133379333143	1	1	0	0	0	1	0	1	1	0	1	6
10101101011	8.38039891762916	8.581868890946987	8.278543674542219	8.41360382770612	0.06301913897997485	9.1034141307891	9.123945241025966	9.0782334467228	9.101864272845956	0.009346956539757468	1	0	1	0	1	1	0	1	0	1	1	7
10010110010	9.258963531711704	9.238167166006836	9.235551390220856	9.244227362646464	0.005237311329618499	8.87432518986188	9.158440621007939	9.227775533489929	9.086847114786583	0.0764591491718476	1	0	0	1	0	1	1	0	0	1	0	5
01111010101	9.187798178181122	9.353359172488496	9.14775767746915	9.229638342712922	0.04449895731846541	8.687330631915795	9.262862442539298	9.06544260868511	9.005211894380068	0.11939431900859959	0	1	1	1	1	0	1	0	1	0	1	7
10010111000	9.297985954565167	9.289064343360149	9.19722049268225	9.261423596869188	0.022772160368355245	9.334838609248374	9.300037083044026	9.372863966151753	9.335913219481384	0.014870579545763537	1	0	0	1	0	1	1	1	0	0	0	5
01000011011	8.908483980985624	9.2464348283967	9.083309495488477	9.079409434956935	0.06899770729352574	8.587108432227478	9.153850572608508	8.675430518457615	8.805463174431202	0.12448596449371085	0	1	0	0	0	0	1	1	0	1	1	5
00010011000	8.683557346594792	8.905230008492904	8.667675346238228	8.752154233775308	0.05421746964444136	7.0	7.0	7.0	7.0	0.0	0	0	0	1	0	0	1	1	0	0	0	3
00001001111	7.636140689787871	7.782224742615434		7.709182716201653	0.04217083361215247	7.0	7.0	7.0	7.0	0.0	0	0	0	0	1	0	0	1	1	1	1	5
11111011000	9.502330695433496	9.534291749927428	9.511140559036663	9.515921001465863	0.006739395663499663	9.396625151878675	9.38628256360258	9.336406714566188	9.373104810015814	0.013145372698435385	1	1	1	1	1	0	1	1	0	0	0	7
10111000111	9.446983647074703	9.353203972104117	9.437922356838847	9.412703325339223	0.021117356691165493	8.786996638046483	9.161725377830674	8.97275229929655	8.973824771724571	0.07649212350834293	1	0	1	1	1	0	0	0	1	1	1	7
00110110011	8.475031012186589	8.811884818852041	8.083720218176094	8.456878683071574	0.148774466732151	8.303362176362075	9.010285862282654	8.680879896521981	8.66484264505557	0.1444115470364887	0	0	1	1	0	1	1	0	0	1	1	6
11101011110	9.550369554033377	9.535959880294284	9.583727589277757	9.556685674535139	0.01000298737900358	9.577048428808551	9.584480180976351	9.55798718317316	9.573171930986021	0.005578831414015288	1	1	1	0	1	0	1	1	1	1	0	8
00010101101	7.0	7.0		7.0	0.0	7.768218536464523			7.768218536464523	0.0	0	0	0	1	0	1	0	1	1	0	1	5
11000011001	9.505178867082712	9.570240979634873	9.603019115602036	9.559479654106541	0.02033073679975643	9.744404214719193	9.68678183194656	9.715806892289702	9.715664312985151	0.011762227649999915	1	1	0	0	0	0	1	1	0	0	1	5
10011011110	9.432585467382369	9.401776788285972	9.46232458599979	9.43222894722271	0.012359910207107397	8.717941159979386	9.071972402793712	9.23827460979381	9.009396057522302	0.10849237606823661	1	0	0	1	1	0	1	1	1	1	0	7
00111000001	7.0	7.0	7.0	7.0	0.0	7.0	7.0	7.0	7.0	0.0	0	0	1	1	1	0	0	0	0	0	1	4
00010001011	7.0	7.0	7.0	7.0	0.0	7.0	7.0	7.0	7.0	0.0	0	0	0	1	0	0	0	1	0	1	1	4
10011000010	8.539185793899152	8.56484211935843	8.479147613656172	8.527725175637919	0.017955483865594975						1	0	0	1	1	0	0	0	0	1	0	4
10010100000	8.318157882408615	8.827791669682037	8.357725811996348	8.501225121362333	0.11574086581961816	7.600083455055662			7.600083455055662	0.0	1	0	0	1	0	1	0	0	0	0	0	3
11010010111	9.530447793225166	9.616100954813216	9.609101258128216	9.5852166687222	0.01941636436457518	9.58184867660538	9.656361177324971	9.623195302563085	9.62046838549781	0.015240326157830981	1	1	0	1	0	0	1	0	1	1	1	7
01100011011	8.887234873956606	9.222985942071793	9.11778356375688	9.076001459928426	0.07010884761731925	7.880881529244147			7.880881529244147	0.0	0	1	1	0	0	0	1	1	0	1	1	6
10011000111	9.375213023723882	9.388577539832344	9.377630714591039	9.380473759382422	0.002907311199593511	8.598493313723365	9.157640983853726	9.121832097381176	8.959322131652756	0.1277814840354698	1	0	0	1	1	0	0	0	1	1	1	6
00101011001	8.913783080772802	9.317183111190618	9.05866810686108	9.096544766274834	0.08342549283795357	7.383268660052736			7.383268660052736	0.0	0	0	1	0	1	0	1	1	0	0	1	5
11110111001	9.452240616851178	9.480606911861878	9.502147851907589	9.478331793540214	0.010218978669426306	9.982537299080565	9.99883106454562	10.024507781732712	10.001958715119633	0.008638257946468721	1	1	1	1	0	1	1	1	0	0	1	8
11011100000	9.359148151735074	9.478636341668324	9.384150797704278	9.407311763702559	0.025728323053466597	9.345776968324444	9.250194616462831	9.309951981728418	9.301974522171898	0.01971347421004726	1	1	0	1	1	1	0	0	0	0	0	5
11100111001	9.385355786201158	9.397498136504304	9.459713111479982	9.414189011395148	0.016284921113930047	9.982535498706943	9.970008337307707	9.956710495984758	9.969751443999803	0.005272288987858172	1	1	1	0	0	1	1	1	0	0	1	7
11000001111	9.398629870107273	9.430159798231305	9.471157818961622	9.433315829100067	0.014846695700773481	9.272522408703995	9.41901043727782	9.218146582532684	9.303226476171501	0.04241388698499481	1	1	0	0	0	0	0	1	1	1	1	6
10110100010	8.317078327961866	8.743833297102222	8.136762478269429	8.399224701111171	0.12727579289071983	8.562630903876528	9.152144334695748	9.335524716745429	9.016766651772569	0.1648668903833199	1	0	1	1	0	1	0	0	0	1	0	5
01100110000	9.331588148708924	9.431773054698258	9.291587649511062	9.351649617639415	0.029481163078061066	9.36394889647119	9.376321934977577	9.489684635243693	9.409985155564152	0.028290983005079425	0	1	1	0	0	1	1	0	0	0	0	4
00101001101	7.0	7.0	7.0	7.0	0.0	7.0	7.0	7.0	7.0	0.0	0	0	1	0	1	0	0	1	1	0	1	5
00000011000	8.614625323365509	8.824619851940694	8.552172934071413	8.663806036459206	0.05826789806491666	7.0	7.0	7.0	7.0	0.0	0	0	0	0	0	0	1	1	0	0	0	2
11111000000	9.336346792179368	9.433751513487891	9.36756818440891	9.379222163358724	0.020305095223940653	8.751279211306228	9.256737806157103	9.313224241157988	9.10708041954044	0.12632204490274776	1	1	1	1	1	0	0	0	0	0	0	5
11111101000	9.390257265331401	9.400594748544023	9.38017556641507	9.390342526763497	0.004168157103518771	9.140998873529142	9.197233179496145	9.102119726288166	9.146783926437818	0.01952239044940339	1	1	1	1	1	1	0	1	0	0	0	7
11110100010	9.372577949601887	9.42341540595705	9.366193231076332	9.387395528878422	0.012801463563672297	9.675742936234997	9.632702958620568	9.642943723957632	9.650463206271066	0.009178933116645966	1	1	1	1	0	1	0	0	0	1	0	6
11101000001	9.30445086756436	9.404213266085288	9.395627110714292	9.368097081454648	0.022570485605984982	9.076627240055556	9.161036339185165	9.234236385646028	9.157299988295582	0.03219894131778561	1	1	1	0	1	0	0	0	0	0	1	5
10011111010	9.273535227288859	9.24411673904247	9.279938138691495	9.265863368340941	0.007798891299316774	9.375455652464591	9.398248698852953	9.422935945330856	9.3988800988828	0.009694444733667804	1	0	0	1	1	1	1	1	0	1	0	7
10010010100	9.44394706825064	9.432087188498704	9.500770962699793	9.458935073149712	0.014988025374542075			7.0	7.0	0.0	1	0	0	1	0	0	1	0	1	0	0	4
10001001011	8.360512783436103	8.30943636689355	8.353709685374707	8.341219611901453	0.011322555168280663			7.0	7.0	0.0	1	0	0	0	1	0	0	1	0	1	1	5
11111011011	9.506988705608943	9.534079968141373	9.579768634932108	9.540279102894141	0.015016943107889001	9.769604700495966	9.794090477352716	9.73086938732964	9.764854855059442	0.013013757654111143	1	1	1	1	1	0	1	1	0	1	1	9
10000111011	9.262682606664672	9.274409043288426	9.232680869615146	9.25659083985608	0.008785806135129985	9.573472946156038	9.643692976287976	9.601558572880704	9.606241498441571	0.014428909070503065	1	0	0	0	0	1	1	1	0	1	1	6
01111111000	9.356614287593766	9.369680554297943	9.37387719172142	9.366724011204376	0.0036755458784654593	9.321274177694166	9.279194696318301	9.33689185472364	9.31245357624537	0.012183272545116915	0	1	1	1	1	1	1	1	0	0	0	7
00110101010	7.0	7.0	7.0	7.0	0.0	7.0	7.0	7.0	7.0	0.0	0	0	1	1	0	1	0	1	0	1	0	5
10001111010	9.219331327497525	9.220977256091011	9.203770923958883	9.214693169182473	0.0038761847818201767	9.495517668444883	9.514967089491913	9.539278897262397	9.516587885066398	0.008951084856274974	1	0	0	0	1	1	1	1	0	1	0	6
11001101010	9.285314557608618	9.305678465546992	9.34315183580576	9.31138161965379	0.011976937299018955	9.674072708262257	9.67328763369151	9.655358792793944	9.667573044915903	0.0043213626649955495	1	1	0	0	1	1	0	1	0	1	0	6
10111001101	8.895120197516864	8.98774954135366	8.800310272837333	8.894393337235952	0.038261743491127216			7.0	7.0	0.0	1	0	1	1	1	0	0	1	1	0	1	7
10101111110	9.263516195758537	9.300759085586362	9.36917710891841	9.311150796754436	0.021878634510236576	10.049463030987447	10.006578551736213	9.959813447480382	10.005285010068013	0.018305358474515324	1	0	1	0	1	1	1	1	1	1	0	8
00011100100	7.0	7.0		7.0	0.0	7.602352791375148			7.602352791375148	0.0	0	0	0	1	1	1	0	0	1	0	0	4
11111010100	9.526739074855687	9.547963878277313	9.559359164826617	9.544687372653206	0.006758564742316433	9.106573900612377	9.258478743516367	9.243495057487113	9.202849233871953	0.034175606694048025	1	1	1	1	1	0	1	0	1	0	0	7
11000000010	9.444352675533034	9.391544369185656	9.394189941090216	9.410028995269636	0.012147263291194246	9.266923736467364	9.35524115158342	9.25910522451211	9.293756704187631	0.021796541147518462	1	1	0	0	0	0	0	0	0	1	0	3
10000001111	8.9916961059301	9.114941147590406	9.100283757241607	9.068973670254037	0.02748507544662358	7.769129271319381	8.82195179684447		8.295540534081926	0.30392368426040595	1	0	0	0	0	0	0	1	1	1	1	5
11010011110	9.497994595047448	9.581496550743012	9.617171207227658	9.565554117672706	0.024971273835612692	9.365897841339619	9.540381660416019	9.423218281825331	9.443165927860322	0.03630790138207857	1	1	0	1	0	0	1	1	1	1	0	7
00010001010	7.0	7.0	7.0	7.0	0.0	7.0	7.0	7.0	7.0	0.0	0	0	0	1	0	0	0	1	0	1	0	3
11100100010	9.353084219205023	9.344861430208873	9.36335877737748	9.35376814226379	0.003783489926239346	9.67038450212861	9.717495117809888	9.679499139216226	9.689126253051574	0.010201009084614656	1	1	1	0	0	1	0	0	0	1	0	5
10111000101	9.022407794322136	9.1235905254036	9.030094698901019	9.058697672875583	0.022996680403260448						1	0	1	1	1	0	0	0	1	0	1	6
00110101110	7.0	7.0	7.0	7.0	0.0	7.224154924027602			7.224154924027602	0.0	0	0	1	1	0	1	0	1	1	1	0	6
10011101001	8.342042252899471	8.464364743243268	8.11775115668389	8.308052717608875	0.07176548727027719	8.486937154282655	8.873743021472242	9.059561179516717	8.806747118423871	0.11926225082967698	1	0	0	1	1	1	0	1	0	0	1	6
01110001011	8.027691151096148	8.64201690616162	8.182449205413612	8.28405242089046	0.13044247990373437			7.0	7.0	0.0	0	1	1	1	0	0	0	1	0	1	1	6
00110010100	8.795197638000838	9.196374693476193	8.950085983511158	8.98055277166273	0.0825953250747013	7.0	7.0	7.0	7.0	0.0	0	0	1	1	0	0	1	0	1	0	0	4
10111111101	9.350054257245567	9.339671214587923	9.403595634003947	9.36444036861248	0.014004778943958312	10.025960725716796	9.99691880879094	9.87007292800951	9.964317487505749	0.0338437241367392	1	0	1	1	1	1	1	1	1	0	1	9
10000001011	8.527736963366612	8.777176773219518	8.237585038969373	8.5141662585185	0.11024815413445377	7.0		7.0	7.0	0.0	1	0	0	0	0	0	0	1	0	1	1	4
11011000010	9.51611733519857	9.515695621714384	9.514941399318324	9.515584785410427	0.00024321451893297513	9.339755996479363	9.334372303230246	9.301084597763603	9.325070965824404	0.008551368582584751	1	1	0	1	1	0	0	0	0	1	0	5
10010110000	9.268431185695608	9.228765135102481	9.143511940430633	9.213569420409575	0.026058865312224382	8.876375528774815	9.126894855138456	9.212543671391405	9.071938018434892	0.0713178863176676	1	0	0	1	0	1	1	0	0	0	0	4
10000001101	8.559681521754174	8.739244055688394	8.46938176581954	8.589435781087369	0.0560808951941533			7.0	7.0	0.0	1	0	0	0	0	0	0	1	1	0	1	4
11111011010	9.457531485895881	9.539772740860878	9.591034137408922	9.529446121388562	0.027494601871845197	9.690797564968317	9.664871587713806	9.676742133709476	9.6774704287972	0.005298378438281189	1	1	1	1	1	0	1	1	0	1	0	8
11000000011	9.433029359574798	9.48621069931357	9.446182153365466	9.455140737417945	0.01130822632181015	9.316046680302627	9.409399585675166	9.308628629168242	9.344691631715344	0.022927771914964572	1	1	0	0	0	0	0	0	0	1	1	4
00000001000	7.0	7.0	7.0	7.0	0.0	7.0	7.0	7.0	7.0	0.0	0	0	0	0	0	0	0	1	0	0	0	1
10011100100	9.023100517279936	9.074089204829887	8.977609653537963	9.024933125215929	0.019704461395235986	9.023989214700496	9.172411706443006	9.19143888801666	9.129279936386721	0.037427954046326956	1	0	0	1	1	1	0	0	1	0	0	5
10101000100	8.548638253795348	8.772122910685201	8.491996361171344	8.604252508550632	0.06046683655060307	7.337344391529673		7.0	7.168672195764836	0.09738293762963374	1	0	1	0	1	0	0	0	1	0	0	4
10000000010	8.238508879936989	8.33775052691596	8.112876828272631	8.229712078375194	0.04600739591571275			7.0	7.0	0.0	1	0	0	0	0	0	0	0	0	1	0	2
00110100000	7.0	7.0	7.0	7.0	0.0	7.0	7.0	7.0	7.0	0.0	0	0	1	1	0	1	0	0	0	0	0	3
00111001101	7.0	7.0	7.0	7.0	0.0	7.0	7.0	7.0	7.0	0.0	0	0	1	1	1	0	0	1	1	0	1	6
00001101111	7.0	7.0	7.0	7.0	0.0	8.243548350733304	9.08474843203715	8.887529252429443	8.738608678399965	0.17960020286892361	0	0	0	0	1	1	0	1	1	1	1	6
11111111110	9.455343526159373	9.43469252509546	9.500465209098683	9.463500420117839	0.013732034806333919	10.078403006373467	10.009879470023883	10.072569584221117	10.053617353539488	0.015509454344154294	1	1	1	1	1	1	1	1	1	1	0	10
11111110011	9.420619187249796	9.416646469120591	9.505864295876382	9.447709984082257	0.020576639697805335	9.919805926201288	9.996167521742793	9.978647607978246	9.964873685307444	0.016330258355361057	1	1	1	1	1	1	1	0	0	1	1	9
10001101000	8.020037788922872	8.072795255036006	7.9539126837370215	8.015581909231967	0.024317886378580785	8.224019904260762	9.027797725586646	9.070411273319477	8.77407630105563	0.19466873929567635	1	0	0	0	1	1	0	1	0	0	0	4
11000000101	9.47010165530933	9.46835934624342	9.485656335653287	9.474705779068678	0.003887907049532335	9.144257674551378	9.396831306491553	9.281183589582426	9.27409085687512	0.05161732595231582	1	1	0	0	0	0	0	0	1	0	1	4
01110110000	9.381036831552958	9.442388034303058	9.370334341927817	9.397919735927944	0.015872974890925113	9.263596744120749	9.330588546318204	9.44712279428164	9.347102694906864	0.037914356558830374	0	1	1	1	0	1	1	0	0	0	0	5
00111101111	7.0	7.0	7.0	7.0	0.0	7.5456131320568085			7.5456131320568085	0.0	0	0	1	1	1	1	0	1	1	1	1	8
00101001111	7.457267060117493	7.578954624635202		7.518110842376347	0.035128174065664534	7.0	7.0	7.0	7.0	0.0	0	0	1	0	1	0	0	1	1	1	1	6
00010110011	8.145502058729758	8.868750103504722	8.295805053575318	8.436685738603265	0.15580835403798685	8.425504425788809	9.020530001492881	8.85040885440131	8.765481093894332	0.12511554813720435	0	0	0	1	0	1	1	0	0	1	1	5
01100001010	7.378128052285353	7.451896525666727		7.41501228897604	0.021295123982221865		7.0	7.0	7.0	0.0	0	1	1	0	0	0	0	1	0	1	0	4
00101101100	7.0	7.0	7.0	7.0	0.0	8.089048561511616	8.722996688156169		8.406022624833891	0.18300506078524578	0	0	1	0	1	1	0	1	1	0	0	5
11001111011	9.457246232188732	9.422672411726193	9.461831973885003	9.44725020593331	0.008739834407200808	10.03605314588274	9.995180477420327	10.056351166960145	10.029194930087737	0.01271966756387074	1	1	0	0	1	1	1	1	0	1	1	8
00000001100	7.0	7.0	7.0	7.0	0.0	7.0	7.0	7.0	7.0	0.0	0	0	0	0	0	0	0	1	1	0	0	2
10101101101	9.1112078281498	9.101573771188262	9.139140440175858	9.11730734650464	0.007965726037496254	9.406757211796407	9.467890322816986	9.310129497920133	9.394925677511177	0.03247334386511192	1	0	1	0	1	1	0	1	1	0	1	7
11101101101	9.305561402935393	9.33855571048351	9.385238649778463	9.343118587732455	0.016343861246732216	9.962465262100553	9.972156431083556	9.898426406108246	9.944349366430785	0.01635628524784581	1	1	1	0	1	1	0	1	1	0	1	8
10111111011	9.31833688064124	9.29580994634318	9.351711122980436	9.321952649988285	0.01148216536151978	9.553903181206724	9.541257094075071	9.527062941991694	9.540741072424497	0.005481777677571157	1	0	1	1	1	1	1	1	0	1	1	9
11100001011	9.406881832919604	9.392775781545602	9.372496128619675	9.390717914361625	0.0070565605179470975	9.22011819130301	9.285225489968024	9.08424291633781	9.196528865869615	0.04186454532488878	1	1	1	0	0	0	0	1	0	1	1	6
11011101100	9.36705055580765	9.390321769288418	9.424530882291144	9.393967735795737	0.01180371966085019	9.8580870007942	9.822516102374227	9.770463714138275	9.817022272435567	0.01799118634518379	1	1	0	1	1	1	0	1	1	0	0	7
11000010111	9.495457971911684	9.559886785783377	9.543677623101084	9.533007460265381	0.01368184499883956	9.730507143738876	9.670331816826163	9.592281694924447	9.664373551829827	0.028293681174167144	1	1	0	0	0	0	1	0	1	1	1	6
00001001010	7.0	7.0	7.0	7.0	0.0	7.0	7.0	7.0	7.0	0.0	0	0	0	0	1	0	0	1	0	1	0	3
00110011111	8.639062179363995	9.004548621367807	8.69271400559136	8.778774935441055	0.08057082552749975		7.0	7.0	7.0	0.0	0	0	1	1	0	0	1	1	1	1	1	7
00101000000	7.0	7.0	7.0	7.0	0.0	7.0	7.0	7.0	7.0	0.0	0	0	1	0	1	0	0	0	0	0	0	2
10011001000	7.9483366041699055	7.890243582964821		7.919290093567364	0.01677001071539703	7.0	7.0	7.0	7.0	0.0	1	0	0	1	1	0	0	1	0	0	0	4
11010101110	9.3828310362704	9.4144844715053	9.437957400864699	9.411757636213466	0.011293845974522996	10.033849976291421	9.950618714862275	9.926906169705626	9.970458286953106	0.02292906055396907	1	1	0	1	0	1	0	1	1	1	0	7
10001101111	9.179364592202788	9.179259543414801	9.184850805612689	9.181158313743426	0.0013056691110558743	9.581488509699136	9.634077323123057	9.4875561636526	9.567707332158264	0.030302786406400252	1	0	0	0	1	1	0	1	1	1	1	7
01110000001	7.983277552059951	8.751094415715835	8.201457708459149	8.311943225411644	0.16152449304506164						0	1	1	1	0	0	0	0	0	0	1	4
11111100001	9.392711544047632	9.506257981187725	9.382820309522007	9.427263278252456	0.028001730449455874	9.394812223064102	9.446356739723976	9.469444975955517	9.436871312914532	0.015599102230340717	1	1	1	1	1	1	0	0	0	0	1	7
01001001010	7.5572566173341675	7.770967150077598		7.664111883705883	0.06169291680403898	7.3978827197180355			7.3978827197180355	0.0	0	1	0	0	1	0	0	1	0	1	0	4
11010000110	9.467067190641655	9.493080030601131	9.526214412367963	9.495453877870249	0.012102512291724678	9.564520728411976	9.473030886784633	9.5370202564994	9.524857290565336	0.019163990039846306	1	1	0	1	0	0	0	0	1	1	0	5
01111001011	8.110157706541965	8.54719416556525	8.3281505848967	8.328500819001304	0.08920977957119641			7.0	7.0	0.0	0	1	1	1	1	0	0	1	0	1	1	7
00011010101	8.79024686842866	9.063712289132882	8.784395747159817	8.879451634907118	0.06515692650159449	7.0		7.0	7.0	0.0	0	0	0	1	1	0	1	0	1	0	1	5
10101100110	9.239224823599756	9.10294823842071	9.123628680259028	9.155267247426497	0.02998215056863912	9.37117091983933	9.370969912117351	9.354657363373148	9.365599398443278	0.0038688111790102773	1	0	1	0	1	1	0	0	1	1	0	6
00011101111	7.155530860269008		7.0	7.077765430134503	0.04489789202180285	7.773950756065321	8.563390651377867		8.168670703721594	0.22789166803386438	0	0	0	1	1	1	0	1	1	1	1	7
11101010111	9.495475404141644	9.546239199138878	9.549677604333183	9.530464069204568	0.012390256048835322	9.626035770911155	9.796553106073643	9.712124077441972	9.711570984808922	0.03480725458704607	1	1	1	0	1	0	1	0	1	1	1	8
11101001010	9.480649707515328	9.39353949790958	9.43331996066895	9.435836388697952	0.017803541136096862	9.24804414977496	9.334321408240893	9.232059064578996	9.271474874198283	0.02245790828808875	1	1	1	0	1	0	0	1	0	1	0	6
10011010111	9.461806372773472	9.46779128645143	9.5032300553918	9.477609238205568	0.009140336453516732	8.804407696808756	9.22835906678724	9.158891790369298	9.063886184655097	0.09282891060485042	1	0	0	1	1	0	1	0	1	1	1	7
11010111110	9.463091787211138	9.482872694715454	9.48314971554201	9.4763713991562	0.004695392337053816	10.114365178607585	10.006425182904264	10.059589436956967	10.060126599489607	0.02203397783650694	1	1	0	1	0	1	1	1	1	1	0	8
10111101011	8.808278394514723	8.894731885306115	8.755728807725331	8.819579695848724	0.028653834685528932	8.931798793878997	9.180480843562462	9.009795911854269	9.040691849765244	0.0519239984548593	1	0	1	1	1	1	0	1	0	1	1	8
11011000111	9.514613096592633	9.546628124360408	9.571723615165624	9.544321612039555	0.011686123054244438	9.619757154413897	9.700194987776268	9.639637953867842	9.653196698686003	0.017104779691610214	1	1	0	1	1	0	0	0	1	1	1	7
00101101010	7.0	7.0	7.0	7.0	0.0	7.0	7.0	7.0	7.0	0.0	0	0	1	0	1	1	0	1	0	1	0	5
00001101110	7.0	7.0	7.0	7.0	0.0	7.755528276380644	8.386026038323822		8.070777157352232	0.1820090262906752	0	0	0	0	1	1	0	1	1	1	0	5
10110000011	8.841499029494328	8.987234852547886	8.649716635599576	8.826150172547264	0.06910900478010273						1	0	1	1	0	0	0	0	0	1	1	5
01101011010	8.809213749663899	9.117878461947504	8.82807077715442	8.91838766292194	0.0706356036798933	7.7209781563749456			7.7209781563749456	0.0	0	1	1	0	1	0	1	1	0	1	0	6
11000001000	9.286146775702948	9.222310412116077	9.202436890393674	9.236964692737567	0.017855424852702147	8.783770599132094	9.198175798689649	8.999406663620338	8.993784353814027	0.08461345946001815	1	1	0	0	0	0	0	1	0	0	0	3
00000101111	7.0	7.0	7.0	7.0	0.0	7.658613576363858	8.991279534590609	8.722162140684302	8.457351750546257	0.28768995061173763	0	0	0	0	0	1	0	1	1	1	1	5
11111000010	9.447907537735608	9.486190242781452	9.512562615435977	9.482220131984347	0.013272095431871108	9.219805051689988	9.297448200571266	9.251361229421807	9.256204827227688	0.015941089317802217	1	1	1	1	1	0	0	0	0	1	0	6
11010101111	9.439668879685888	9.469958592062095	9.517202077358183	9.475609849702055	0.015952020352752127	10.028861212780381	9.990073511159046	10.05547032358943	10.024801682509619	0.013426004670837686	1	1	0	1	0	1	0	1	1	1	1	8
10100100000	7.950621351355179	8.171324267787647	7.625417343561436	7.9157876542347525	0.11211127829143579	8.194535109857414	8.786032118727809	8.688682364838177	8.556416531141133	0.12947835465715013	1	0	1	0	0	1	0	0	0	0	0	3
00111101000	7.0	7.0	7.0	7.0	0.0	7.0	7.0	7.0	7.0	0.0	0	0	1	1	1	1	0	1	0	0	0	5
11001111001	9.414996567871922	9.4383649283544	9.469285482151157	9.440882326125825	0.01111736271228645	10.062298668738288	9.990003450097019	10.03344247655108	10.028581531795462	0.01485693579631582	1	1	0	0	1	1	1	1	0	0	1	7
11001100100	9.331936645207293	9.383159128655944	9.405071112092797	9.373388961985343	0.015322938573889744	9.876483846838342	9.880996245404297	9.843300169874329	9.866926754038989	0.008403888432067708	1	1	0	0	1	1	0	0	1	0	0	5
10001010101	9.449626818689378	9.43161283152365	9.481305277793993	9.454181642669006	0.010270464288408119	7.903500137984219	8.703609751940045		8.303554944962132	0.23097175049930177	1	0	0	0	1	0	1	0	1	0	1	5
01101100101	8.91752879241789	9.000566550401544	9.004305351916575	8.974133564912004	0.02002735571256178	9.346671768294463	9.22598559377115	9.401357460734609	9.324671607600074	0.03663292743215351	0	1	1	0	1	1	0	0	1	0	1	6
00100011010	8.462844767621442	8.87147202639913	8.44255205049415	8.592289614838242	0.09879276524271866	7.0	7.0	7.0	7.0	0.0	0	0	1	0	0	0	1	1	0	1	0	4
11010110011	9.389658895505027	9.439961449426619	9.47730789991464	9.435642748282097	0.017956314479781525	9.968165953476127	9.953398523146193	9.980383005223988	9.967315827282103	0.00551637870589388	1	1	0	1	0	1	1	0	0	1	1	7
01111000001	8.159151174402334	8.85102303455035	8.369669807935887	8.459948005629522	0.14478966494555554		8.441283986553236		8.441283986553236	0.0	0	1	1	1	1	0	0	0	0	0	1	5
00101101110	7.0	7.0	7.0	7.0	0.0	8.088593350925914	8.635230964052857	8.452203732124431	8.392009349034401	0.1135933484246712	0	0	1	0	1	1	0	1	1	1	0	6
11111110000	9.428795460326286	9.377142542147848	9.426666250488354	9.41086808432083	0.011931698187179625	9.831043259438177	9.789119170193137	9.752949796797024	9.791037408809446	0.015955181793402367	1	1	1	1	1	1	1	0	0	0	0	7
11011011110	9.562541722158826	9.531467797847114	9.586544155052652	9.560184558352864	0.011273260742897336	9.490304259266374	9.586029438246488	9.46171084664007	9.512681514717643	0.026581115558165766	1	1	0	1	1	0	1	1	1	1	0	8
10101101010	8.265473081509088	8.574184914657687	8.461506489252304	8.433721495139693	0.0637766328745236	8.91374911386304	9.13261961113018	9.155157670296406	9.067175465096541	0.054439147935048546	1	0	1	0	1	1	0	1	0	1	0	6
11110000011	9.461947443000506	9.496620406914733	9.489597358380676	9.48272173609864	0.007483417701528098	9.3021071476386	9.348457431483094	9.325304285888231	9.325289621669974	0.009461213491546987	1	1	1	1	0	0	0	0	0	1	1	6
11000111011	9.413256913755156	9.425884387823146	9.438592183468216	9.425911161682173	0.005171548937665749	10.082987408646142	10.006454788577177	10.066650797662762	10.05203099829536	0.016455061955785603	1	1	0	0	0	1	1	1	0	1	1	7
11011101101	9.406441744047072	9.401762463327527	9.482274940972081	9.430159716115561	0.018450254801300078	9.901147907688141	9.925920751882147	9.861989844933085	9.896352834834458	0.013159500741457508	1	1	0	1	1	1	0	1	1	0	1	8
10010011000	9.429873151617937	9.391275756280203	9.409620308973349	9.41025640562383	0.007881869447513562		8.39273424527784		8.39273424527784	0.0	1	0	0	1	0	0	1	1	0	0	0	4
00110011010	8.622155502836513	8.869908238163012	8.61068184693883	8.700915195979453	0.05979394816751318	7.0	7.0	7.0	7.0	0.0	0	0	1	1	0	0	1	1	0	1	0	5
10011011001	9.506751063130745	9.466021672083484	9.507872267482943	9.493548334232392	0.00973483540003712	8.472597597104684	9.21331059472905	8.917976197085595	8.867961462973108	0.152227922008237	1	0	0	1	1	0	1	1	0	0	1	6
01010001001	7.818173437971728	8.416307456895684	7.962630729231034	8.065703874699482	0.12741607115803763						0	1	0	1	0	0	0	1	0	0	1	4
11011011010	9.544666876721898	9.549036664785847	9.544361231766317	9.546021591091353	0.001067813712462362	9.834992660217418	9.738911046764693	9.773533779766217	9.782479162249443	0.019865942429814064	1	1	0	1	1	0	1	1	0	1	0	7
00000111000	8.25636463532913	8.673533844941257	8.287159834236148	8.405686104835512	0.09490687978113696	9.033690407449676	9.28909475769261	9.31876016861705	9.213848444586445	0.06398267722602628	0	0	0	0	0	1	1	1	0	0	0	3
11011011101	9.539126038570217	9.575959042807037	9.59523938851658	9.570108156631278	0.011639384736975466	9.516513904450632	9.47942740569374	9.336522696182158	9.444154668775509	0.038799341147248166	1	1	0	1	1	0	1	1	1	0	1	8
10011101000	8.201256912888109	8.380441445638601	8.075978883392034	8.219225747306247	0.062472023352052014	8.166680545470557	8.753852930492673	8.631222649328434	8.51725204176389	0.12644816261655328	1	0	0	1	1	1	0	1	0	0	0	5
11011011100	9.535322249383254	9.527937267678213	9.532128446293967	9.531795987785145	0.0015120287249814031	9.221677092013117	9.290486624384283	9.245984282694597	9.252715999697331	0.014245905532458048	1	1	0	1	1	0	1	1	1	0	0	7
11111111010	9.462297484583193	9.47168862866169	9.468992957684497	9.467659690309794	0.001974065103414436	9.996660539069145	9.964053771567533	9.99367865907809	9.984797656571589	0.007359285244578252	1	1	1	1	1	1	1	1	0	1	0	9
10011000011	8.689400976662284	8.794513018356097	8.631036121763023	8.70498337226047	0.033821300535213566						1	0	0	1	1	0	0	0	0	1	1	5
11011001000	9.370601295593277	9.360043076597393	9.259751122455755	9.330131831548806	0.024976496139443978	8.513009824158322	9.060267570133096	9.1635226947413	8.912266696344238	0.14272347545762817	1	1	0	1	1	0	0	1	0	0	0	5
01110110001	9.3438423998132	9.46210686621234	9.402071901186694	9.402673722404078	0.024141570802081826	9.387098506943751	9.535663541960156	9.553978510690897	9.492246853198267	0.03736306232976371	0	1	1	1	0	1	1	0	0	0	1	6
00101101000	7.0	7.0	7.0	7.0	0.0	7.4700338570425355			7.4700338570425355	0.0	0	0	1	0	1	1	0	1	0	0	0	4
11110000100	9.478476608610816	9.537022005714837	9.531754955839547	9.515751190055065	0.013222337602080003	8.954725749761137	9.153242426923342	9.239789996760928	9.115919391148468	0.059665963188095306	1	1	1	1	0	0	0	0	1	0	0	5
11100110001	9.408695657399717	9.408139284199999	9.41368699242285	9.410173978007522	0.0012472196075049066	10.004292658355872	9.971272248421597	10.002867544477905	9.992810817085125	0.0076205882586409535	1	1	1	0	0	1	1	0	0	0	1	6
10100010101	9.45605008464473	9.415010522021797	9.477658875615749	9.449573160760758	0.012991452056751705	8.180578910337495	9.031752358945726	8.676103372526333	8.629478213936517	0.17452530330587748	1	0	1	0	0	0	1	0	1	0	1	5
10001101010	8.348416658674969	8.476855362269026	8.302655128140625	8.37597571636154	0.03686926596779997	8.71371120584523	9.141462286744535	9.194308755347826	9.016494082645863	0.10759204599915853	1	0	0	0	1	1	0	1	0	1	0	5
11101111010	9.405287886248082	9.446916826306524	9.432322345580458	9.428175686045021	0.008623014279380887	10.069295680359158	10.015660215708913	10.018608053589283	10.034521316552452	0.012309310301983716	1	1	1	0	1	1	1	1	0	1	0	8
11100011101	9.521520396129674	9.557537764042424	9.595568173842803	9.558208778004966	0.015116801033214174	9.419332542185742	9.533184132706717	9.423563041289963	9.458693238727474	0.026350661740703354	1	1	1	0	0	0	1	1	1	0	1	7
11001001100	9.410662955766286	9.29667877819232	9.339824214259169	9.349055316072592	0.023494709031399365	8.843527914706549	9.095107561161877	8.9901773002169	8.976270925361774	0.051588306287787385	1	1	0	0	1	0	0	1	1	0	0	5
11000110000	9.305474825436583	9.343516123802903	9.381372349462977	9.34345443290082	0.01549253257034813	9.789467232658787	9.83029180214316	9.801535404077633	9.807098146293193	0.008562217821274313	1	1	0	0	0	1	1	0	0	0	0	4
10111000010	8.663414855176027	8.90652443612865	8.58591546855592	8.718618253286865	0.06829237255390844						1	0	1	1	1	0	0	0	0	1	0	5
10110110011	9.309347946539717	9.272825999662606	9.330748263298348	9.30430740316689	0.011956884100049588	9.144391862388481	9.266590796554016	9.297138803030156	9.236040487324217	0.032997217090675726	1	0	1	1	0	1	1	0	0	1	1	7
00000000001	7.0	7.0	7.0	7.0	0.0	7.0	7.0	7.0	7.0	0.0	0	0	0	0	0	0	0	0	0	0	1	1
00011000110	8.775477929931528	8.986334944138768	8.724957137241455	8.828923337103916	0.05660079231700902	7.610848765994272	8.694993479247676		8.152921122620974	0.31296562101868125	0	0	0	1	1	0	0	0	1	1	0	4
10000001001	8.121377889691281	7.653688085624138	8.156141479059484	7.977069151458301	0.11455247130425263			7.0	7.0	0.0	1	0	0	0	0	0	0	1	0	0	1	3
00011110001	8.303670161762097	8.615751485655046	8.203486543672387	8.374302730363178	0.08778032752974992	8.813481540426881	9.06357602845268	9.270053984464885	9.049037184448148	0.09333910635638398	0	0	0	1	1	1	1	0	0	0	1	5
00010001110	7.362636106305429	7.552522182947947		7.457579144626688	0.05481538873246	7.0	7.0	7.0	7.0	0.0	0	0	0	1	0	0	0	1	1	1	0	4
11001010101	9.527650940428119	9.563543560863303	9.566482391455427	9.55255896424895	0.008826724754088277	9.374786497840928	9.405431325849113	9.223715832874	9.334644552188013	0.039714946698101584	1	1	0	0	1	0	1	0	1	0	1	6
11000001101	9.493212441080752	9.423176776750736	9.445905955782443	9.454098391204644	0.014586441010671842	8.916233276723721	9.293666427910493	8.844011627889376	9.01797044417453	0.09858177504504659	1	1	0	0	0	0	0	1	1	0	1	5
00100101011	7.0	7.0	7.0	7.0	0.0	7.377597991021147			7.377597991021147	0.0	0	0	1	0	0	1	0	1	0	1	1	5
00100000001	7.0	7.0	7.0	7.0	0.0	7.0	7.0	7.0	7.0	0.0	0	0	1	0	0	0	0	0	0	0	1	2
10110011110	9.444952491034062	9.392423082944608	9.537781277250897	9.458385617076521	0.030048815338408474	8.512858802051799	9.168895934361313	9.297257461357976	8.993004065923696	0.17176717585983892	1	0	1	1	0	0	1	1	1	1	0	7
10011001111	9.223144583413683	9.121200363552527	9.201307882767924	9.181884276578044	0.021913136656807785	7.9898336657688125	8.955520922541611		8.472677294155211	0.2787698988253833	1	0	0	1	1	0	0	1	1	1	1	7
00010001001	7.0	7.0	7.0	7.0	0.0	7.0	7.0	7.0	7.0	0.0	0	0	0	1	0	0	0	1	0	0	1	3
00010101001	7.0	7.0	7.0	7.0	0.0	7.2997196936482895			7.2997196936482895	0.0	0	0	0	1	0	1	0	1	0	0	1	4
11010001100	9.453000043520658	9.404710633649767	9.40279399472808	9.420168223966167	0.01161439234766481	8.524637563965845	9.203545225085948	9.074896445880011	8.934359744977268	0.14721969201806445	1	1	0	1	0	0	0	1	1	0	0	5
10101111010	9.216861003526104	9.225740239186518	9.2718396619318	9.238146968214807	0.012049262867554807	9.6407534052211	9.562112167725006	9.532056434110636	9.578307335685581	0.022914589534110623	1	0	1	0	1	1	1	1	0	1	0	7
10011100101	9.158737297337536	9.216849308068994	9.034799853101042	9.136795486169191	0.037961786315413346	9.183673050944773	9.181207353295449	9.221982299167154	9.195620901135792	0.009333741620686382	1	0	0	1	1	1	0	0	1	0	1	6
10010010111	9.447538866163232	9.475435508063509	9.47593318293881	9.466302519055183	0.006634730871929652	8.878052420950496	9.238662314990664	9.158420344662034	9.091711693534398	0.07729532868740818	1	0	0	1	0	0	1	0	1	1	1	6
10110011101	9.500073869733502	9.468681440598443	9.505963959258963	9.491573089863635	0.008182236788871183	8.512766832045111	9.186230180784591	9.017874498002373	8.905623836944024	0.1430841120372184	1	0	1	1	0	0	1	1	1	0	1	7
00110001000	7.0	7.0	7.0	7.0	0.0	7.0	7.0	7.0	7.0	0.0	0	0	1	1	0	0	0	1	0	0	0	3
00000001001	7.0	7.0	7.0	7.0	0.0	7.0	7.0	7.0	7.0	0.0	0	0	0	0	0	0	0	1	0	0	1	2
11001010100	9.518793401898355	9.51901697720714	9.514681306251957	9.517497228452484	0.0009966242905630998	9.28225824689807	9.387000448578645	9.274652273687394	9.31463698972137	0.025631410874360723	1	1	0	0	1	0	1	0	1	0	0	5
11000000001	9.318249040368007	9.442723038496842	9.299725260507168	9.353565779790673	0.03174782194650613	8.992381690183043	9.216147973496636	9.198445442756507	9.135658368812061	0.05078467596607206	1	1	0	0	0	0	0	0	0	0	1	3
11011001100	9.477660447083755	9.414900492235589	9.381862053948042	9.424807664422461	0.019865997237329125	8.618936246250959	9.25088179871053	9.030237556705961	8.966685200555817	0.13093762624339772	1	1	0	1	1	0	0	1	1	0	0	6
01100111000	9.30206901089961	9.343238091068622	9.368504388401279	9.337937163456504	0.013689958126969189	9.345682231568352	9.430176423902726	9.527147617068056	9.43433542417971	0.03707064089032599	0	1	1	0	0	1	1	1	0	0	0	5
00110000010	7.0	7.0	7.0	7.0	0.0	7.0	7.0	7.0	7.0	0.0	0	0	1	1	0	0	0	0	0	1	0	3
00101010101	8.788111527869141	8.873607202836428	8.396038986176567	8.685919238960713	0.10396337361877173	7.0		7.0	7.0	0.0	0	0	1	0	1	0	1	0	1	0	1	5
10111101001	8.307063223601764	8.448231670620721	8.260810121410211	8.338701671877566	0.039859028325028134	8.54138669333186	9.003561869545118	9.032995515668777	8.859314692848585	0.1125649771898902	1	0	1	1	1	1	0	1	0	0	1	7
00011101001	7.0	7.0	7.0	7.0	0.0	7.425772345953677			7.425772345953677	0.0	0	0	0	1	1	1	0	1	0	0	1	5
00000011001	8.806154755215003	9.167441571853416	8.845809478477275	8.9398019351819	0.08088878930070957	7.0		7.0	7.0	0.0	0	0	0	0	0	0	1	1	0	0	1	3
11111000001	9.448091572627938	9.546007830208284	9.527371677664256	9.507157026833491	0.021226447558774533	9.109635827999348	9.206895956665658	9.18222208991986	9.166251291528289	0.020640506122650126	1	1	1	1	1	0	0	0	0	0	1	6
11110000111	9.449387867404198	9.512879690032314	9.53857157506521	9.500279710833908	0.018741678308391733	9.59242409892911	9.661018618999725	9.620880022306258	9.624774246745032	0.01406932706229024	1	1	1	1	0	0	0	0	1	1	1	7
00110100011	7.0	7.0		7.0	0.0	7.341885499141611			7.341885499141611	0.0	0	0	1	1	0	1	0	0	0	1	1	5
11101101010	9.272990100791436	9.37269391297314	9.376458177545047	9.340714063769875	0.023956362387580598	9.71777933474141	9.712640125088713	9.586004775215844	9.67214141168199	0.030471962455234085	1	1	1	0	1	1	0	1	0	1	0	7
00011001000	7.0	7.0	7.0	7.0	0.0	7.0	7.0	7.0	7.0	0.0	0	0	0	1	1	0	0	1	0	0	0	3
01101001010	7.508440691796162	7.677477000083993		7.592958845940077	0.048796579046399904	7.586540564130964			7.586540564130964	0.0	0	1	1	0	1	0	0	1	0	1	0	5
00011000001	7.0	7.0	7.0	7.0	0.0	7.0	7.0	7.0	7.0	0.0	0	0	0	1	1	0	0	0	0	0	1	3
11000111010	9.382570305843169	9.397420085248843	9.465314343014072	9.415101578035362	0.018009813585027765	9.995171603292297	9.973030016821864	10.03208766512943	10.00009642841453	0.01218018803062612	1	1	0	0	0	1	1	1	0	1	0	6
10111000001	8.40123193054119	8.773765231760327	8.371890064701438	8.515629075667652	0.0914612327568956			7.0	7.0	0.0	1	0	1	1	1	0	0	0	0	0	1	5
10110110010	9.19582348687198	9.24656814096576	9.261758112810703	9.234716580216148	0.014096029840414618	8.936311099004527	9.201036459223312	9.195738440744053	9.111028666323962	0.06178145419874282	1	0	1	1	0	1	1	0	0	1	0	6
10011010110	9.467324289744477	9.455863501893779	9.485879232140784	9.469689007926346	0.006183714291386523	8.643908558096163	9.14898505812478	9.259064855053467	9.017319490424804	0.13391924414230233	1	0	0	1	1	0	1	0	1	1	0	6
00110010101	8.797412471184549	8.914871367978424	8.866061910755016	8.859448583305996	0.02408993629426181	7.0	7.0	7.0	7.0	0.0	0	0	1	1	0	0	1	0	1	0	1	5
11101001011	9.420348636057794	9.434418719938801	9.45165660855771	9.435474654851435	0.006401608318991405	9.265659043716084	9.314122689182604	9.068847084554024	9.21620960581757	0.05303138337789244	1	1	1	0	1	0	0	1	0	1	1	7
10011011000	9.422170587446267	9.380616145574676	9.457354324456768	9.420047019159236	0.01568209797421489	7.685413738188333	8.694771563798044		8.190092650993188	0.29137650616221095	1	0	0	1	1	0	1	1	0	0	0	5
10111100010	8.49926533067999	8.613991821002186	8.373202657306628	8.495486602996268	0.04916903569233104	8.585761549526412	9.227423819617506	9.203201614965572	9.005462328036495	0.14846898464608052	1	0	1	1	1	1	0	0	0	1	0	6
10111001100	8.60457077898015	8.629384651616856	8.545337338864737	8.593097589820582	0.017629110619141564			7.0	7.0	0.0	1	0	1	1	1	0	0	1	1	0	0	6
10010000010	8.533309491727126	8.754952821774905	8.445246902441188	8.577836405314406	0.0651490900969879			7.0	7.0	0.0	1	0	0	1	0	0	0	0	0	1	0	3
00110111010	8.444156007322428	8.8984556449956	8.592616559209812	8.64507607050928	0.09457011547156256	8.67056020417918	9.079680380270087	9.299024776687208	9.016421787045491	0.1302197930020565	0	0	1	1	0	1	1	1	0	1	0	6
10011000001	8.499339593676815	8.793715866531349	8.39943488577029	8.564163448659485	0.08368190971230095			7.0	7.0	0.0	1	0	0	1	1	0	0	0	0	0	1	4
11110001110	9.439243616790288	9.490498650477651	9.536063809354658	9.488602025540866	0.019774711593613645	9.252213752850514	9.332802406204436	9.151320787862039	9.24544564897233	0.03712198331542314	1	1	1	1	0	0	0	1	1	1	0	7
10011001011	8.586502002461094	8.967613011732201	8.491159023370951	8.681758012521415	0.10292179988207437			7.0	7.0	0.0	1	0	0	1	1	0	0	1	0	1	1	6
01000101010	8.394489412815291	8.738819740813875	8.585559167900957	8.572956107176708	0.07042723378260413	8.561540084098331	9.068024088053235	9.233142359937405	8.954235510696323	0.14287132000553177	0	1	0	0	0	1	0	1	0	1	0	4
11010001000	9.39502447346103	9.344646624503254	9.358151339133283	9.365940812365855	0.010645725561102387	8.77598167507503	9.232337261556571	8.949414255482662	8.985911064038088	0.09404264821901849	1	1	0	1	0	0	0	1	0	0	0	4
10011011111	9.431740654892474	9.44830321972642	9.5125509657976	9.464198280138831	0.01742635119716407	8.668833705062612	9.070096970437037	9.113334477528085	8.950755051009244	0.10006423310398568	1	0	0	1	1	0	1	1	1	1	1	8
10000110010	9.167153964924896	9.18724551424593	9.186426101935387	9.180275193702071	0.004642069269210478	9.025481491936068	9.249773433232106	9.12715282653749	9.134135917235222	0.045849920754849456	1	0	0	0	0	1	1	0	0	1	0	4
11110101011	9.367766952533664	9.408762886229695	9.436577760726381	9.404369199829913	0.014131585138549573	9.742129796480645	9.715440367330011	9.673291642531558	9.710287268780739	0.014169148870424217	1	1	1	1	0	1	0	1	0	1	1	8
11000001010	9.386143788858382	9.442678779119127	9.336517896885187	9.3884468216209	0.021685291478715275	9.215192741211654	9.305743292996796	9.141541770542977	9.220825934917142	0.033576615492359865	1	1	0	0	0	0	0	1	0	1	0	4
10110001111	9.33917035380587	9.162003207422126	9.244672912000206	9.248615491076066	0.03619094589066612	8.154985021612672	8.928271818063418	8.582547869089789	8.555268236255293	0.15814089243822685	1	0	1	1	0	0	0	1	1	1	1	7
00100001010	7.0	7.0	7.0	7.0	0.0	7.0	7.0	7.0	7.0	0.0	0	0	1	0	0	0	0	1	0	1	0	3
11011010111	9.559764235405098	9.575488660829995	9.614073387181524	9.583108761138872	0.011408479581775492	9.698239103698826	9.697505310545134	9.597697826940774	9.664480747061578	0.02361180293834138	1	1	0	1	1	0	1	0	1	1	1	8
11001001010	9.444377260781543	9.42817464887376	9.38847211583341	9.420341341829571	0.011742847698026922	9.253826801080589	9.37896993923774	9.224626222464613	9.28580765426098	0.033472817216474667	1	1	0	0	1	0	0	1	0	1	0	5
11000101000	9.331024517757292	9.322814315517897	9.2377878043014	9.297208879192196	0.021075261805753052	9.2635860827148	9.211009776179763	9.157627419301967	9.210741092732176	0.021628930206071918	1	1	0	0	0	1	0	1	0	0	0	4
01110000010	8.381709006639984	8.958694644899115	8.623514775193499	8.654639475577532	0.11828966348179737	8.708031031276061	9.00240034469993	9.077216203341534	8.92921585977251	0.07967789263007886	0	1	1	1	0	0	0	0	0	1	0	4
11001111000	9.382026116995311	9.427974532453405	9.411418286213495	9.407139645220738	0.009500388565177048	9.997304472972283	9.91748661355022	9.974538165451404	9.96310975065797	0.016786299816607102	1	1	0	0	1	1	1	1	0	0	0	6
01100011000	8.614120090759426	9.154339269753123	8.586947329948991	8.78513556348718	0.13065101241660088						0	1	1	0	0	0	1	1	0	0	0	4
11001000101	9.444552788385355	9.552006014392152	9.419466533185373	9.47200844532096	0.028743226283087824	9.28043064282252	9.33952666988107	9.271955425611344	9.297304246104979	0.015027791636609639	1	1	0	0	1	0	0	0	1	0	1	5
10110000101	9.026078976741736	9.169068457133905	8.973782257340993	9.056309897072211	0.04127066424917737						1	0	1	1	0	0	0	0	1	0	1	5
11011101010	9.384428415935893	9.391658642775623	9.40690081572299	9.39432929147817	0.00468332968120404	9.588406037796071	9.55143180661013	9.460893320340114	9.533577054915439	0.026782977793149462	1	1	0	1	1	1	0	1	0	1	0	7
10100010100	9.429805000802599	9.408165589284735	9.439459938147305	9.425810176078214	0.006542209567072639	7.512569545029647			7.512569545029647	0.0	1	0	1	0	0	0	1	0	1	0	0	4
00100101010	7.0	7.0	7.0	7.0	0.0	7.0	7.0	7.0	7.0	0.0	0	0	1	0	0	1	0	1	0	1	0	4
11101101000	9.275272010349237	9.351352438605259	9.281672534532289	9.302765661162262	0.017227632281579756	9.29586876114808	9.280163229033423	9.234132256504193	9.270054748895232	0.013098886908431927	1	1	1	0	1	1	0	1	0	0	0	6
11100101000	9.245729026409172	9.301267508645203	9.251620685130169	9.266205740061515	0.01245440767214077	9.235152890328623	9.293579542783307	9.148084908841367	9.2256057806511	0.029890167290350354	1	1	1	0	0	1	0	1	0	0	0	5
10100000100	8.361047717165786	8.600689188639606	8.350869859555656	8.437535588453683	0.05772090917597099			7.0	7.0	0.0	1	0	1	0	0	0	0	0	1	0	0	3
01100000010	8.173925469322635	8.749784098799267	8.272605371490162	8.398771646537353	0.12572571800360988	8.3312622030742	9.157992288966083	9.003522772204036	8.830925754748106	0.17944960135356117	0	1	1	0	0	0	0	0	0	1	0	3
01001111001	9.31861686741058	9.412341043633523	9.341239951913199	9.357399287652433	0.019966214800746698	9.487247826312252	9.475117773740443	9.539262792526289	9.500542797526329	0.013911704026025783	0	1	0	0	1	1	1	1	0	0	1	6
00001010110	8.515068829894108	8.795997990231522	8.540692261337517	8.617253027154383	0.06341196184319862	7.674642342439608	8.68704349554756		8.180842918993584	0.29225503913738177	0	0	0	0	1	0	1	0	1	1	0	4
00100000011	7.0	7.0	7.0	7.0	0.0	7.0	7.0	7.0	7.0	0.0	0	0	1	0	0	0	0	0	0	1	1	3
11001000110	9.423689059926746	9.471400683185903	9.463096256384722	9.452728666499125	0.010406047428722353	9.74633417163746	9.734901680103619	9.696955018665204	9.726063623468761	0.010552713875863921	1	1	0	0	1	0	0	0	1	1	0	5
00111101101	7.0	7.0	7.0	7.0	0.0	7.537317850503375	8.237419228450989		7.8873685394771815	0.20210185950904136	0	0	1	1	1	1	0	1	1	0	1	7
11010011010	9.487772989704816	9.591396284597906	9.516315357686164	9.531828210662962	0.02185151888975109	9.705941861995463	9.723572169517807	9.673452377685807	9.700988803066359	0.010379450674988565	1	1	0	1	0	0	1	1	0	1	0	6
00000000000	7.0	7.0	7.0	7.0	0.0	7.0	7.0	7.0	7.0	0.0	0	0	0	0	0	0	0	0	0	0	0	0
00001001001	7.0	7.0	7.0	7.0	0.0	7.0	7.0	7.0	7.0	0.0	0	0	0	0	1	0	0	1	0	0	1	3
11001001101	9.466507355126957	9.402235313014609	9.4594970570321	9.442746575057889	0.014394199260461121	8.931391317848039	9.204093468526748	8.916557093384538	9.01734729325311	0.06609414250188655	1	1	0	0	1	0	0	1	1	0	1	6
10010001111	9.225252383330972	9.179881739920278	9.165005769056448	9.190046630769233	0.012812151701699623	7.838740224650199	8.695606895309748		8.267173559979973	0.24735610148245438	1	0	0	1	0	0	0	1	1	1	1	6
01101000111	9.037023608626594	9.23843925017837	9.123774123004663	9.133078993936543	0.04124520301950798	9.248305664749095	9.26204763973738	9.27338955376837	9.261247619418283	0.005128034003820718	0	1	1	0	1	0	0	0	1	1	1	6
00110001011	7.0	7.0	7.0	7.0	0.0	7.0	7.0	7.0	7.0	0.0	0	0	1	1	0	0	0	1	0	1	1	5
11111011001	9.482880558105538	9.554302400152027	9.56149179968159	9.53289158597972	0.01774236478119035	9.538537233177866	9.678563475625749	9.536893573071213	9.58466476062494	0.03319990440181655	1	1	1	1	1	0	1	1	0	0	1	8
11011000000	9.46254902963606	9.422661494444345	9.301157673458274	9.395456065846227	0.03431931907621843	8.880939512694395	9.246148459306973	9.208499496209836	9.111862489403736	0.08200449884487941	1	1	0	1	1	0	0	0	0	0	0	4
10101011000	9.372823655331118	9.418500356572752	9.391228284301931	9.394184098735266	0.009382100762467921	8.46339951450342	9.084473939269703	9.04974671611389	8.865873389962337	0.1424724595183333	1	0	1	0	1	0	1	1	0	0	0	5
10110100001	8.47924455987161	8.687291719859092	8.200718711564129	8.455751663764943	0.09966799906515587	8.636637137572501	9.13696373314786	9.261732448602283	9.011777773107548	0.13505534693306653	1	0	1	1	0	1	0	0	0	0	1	5
10010011011	9.49476125870374	9.509184919561068	9.485878241552154	9.496608139938987	0.0048020575047861575	8.50792414982455	9.092935971009654	9.156673047443489	8.919177722759231	0.14598100884860488	1	0	0	1	0	0	1	1	0	1	1	6
11100011000	9.503136846312051	9.546802855635727	9.49371661859174	9.514552106846507	0.011563363630267085	9.433383081481463	9.481849811847269	9.424419192020654	9.446550695116462	0.012613541400995467	1	1	1	0	0	0	1	1	0	0	0	5
10001000111	9.249441915206312	9.255204958346754	9.237154057886896	9.247266977146653	0.0037640075833575764	8.458893588843674	9.270458695037439	9.038766421933916	8.922706235271676	0.1706663194628042	1	0	0	0	1	0	0	0	1	1	1	5
11111000011	9.492141215196968	9.519373463046193	9.537108240038147	9.516207639427103	0.00924684775258761	9.283408402395466	9.442940483187158	9.221745910067837	9.316031598550154	0.04660108097793105	1	1	1	1	1	0	0	0	0	1	1	7
11110011011	9.536406587210415	9.556838209648744	9.562222252892076	9.55182234991708	0.0055599952830109765	9.823969116398565	9.731298525338554	9.737621800915797	9.764296480884305	0.021136908972299865	1	1	1	1	0	0	1	1	0	1	1	8
11000101010	9.277247775273814	9.366750963737527	9.266236911556831	9.303411883522724	0.02250625502607151	9.59758895201027	9.62014637161584	9.593769901735	9.60383507512037	0.005819365390281283	1	1	0	0	0	1	0	1	0	1	0	5
00101000110	8.624754419891303	8.815997909475179	8.723440632119813	8.721397653828765	0.03904409557854163	7.618499013929761			7.618499013929761	0.0	0	0	1	0	1	0	0	0	1	1	0	4
11011000011	9.509916055705274	9.521481840926171	9.513407692282296	9.514935196304581	0.002421838088021565	9.320445556960024	9.381592610815328	9.433172774005225	9.378403647260193	0.02303795231824344	1	1	0	1	1	0	0	0	0	1	1	6
00101010110	8.745733495123286	9.039471462301213	8.86846075439413	8.884555237272876	0.06022841608521949	8.124297472054959	8.973854133682831		8.549075802868895	0.24524588364134595	0	0	1	0	1	0	1	0	1	1	0	5
11101111011	9.382415902566065	9.402129902006386	9.451064087959598	9.41186996417735	0.014429685534670583	10.093282978591251	10.003525234873065	10.028840724956614	10.041882979473643	0.01889306945906409	1	1	1	0	1	1	1	1	0	1	1	9
10101011110	9.35344800976226	9.389905696546386	9.435473675683355	9.392942460664	0.0167778073640909	8.824996874050296	9.165402016616596	9.107354338976645	9.03258440988118	0.0743435964448201	1	0	1	0	1	0	1	1	1	1	0	7
11110001111	9.422342339988797	9.465924690372221	9.515097436685222	9.46778815568208	0.018945014155055832	9.24545790486437	9.385481567727632	9.202641922957943	9.277860465183316	0.03904063771954748	1	1	1	1	0	0	0	1	1	1	1	8
11001010110	9.511026026231553	9.522681538565235	9.565793059731986	9.533166874842925	0.011777900897100674	9.700342046651976	9.71654922613756	9.706131291338766	9.707674188042766	0.0033529480659788414	1	1	0	0	1	0	1	0	1	1	0	6
00111100010	7.0	7.0	7.0	7.0	0.0	7.0	7.0	7.0	7.0	0.0	0	0	1	1	1	1	0	0	0	1	0	5
10100111000	9.208501260462619	9.214989813313805	9.197065269163877	9.206852114313435	0.003704998493290404	9.381250433243828	9.376328591999595	9.404850585527203	9.387476536923542	0.0062242710948102655	1	0	1	0	0	1	1	1	0	0	0	5
10100011011	9.366386060731593	9.429186943611308	9.397473788617443	9.397682264320114	0.012819388435795751	8.936862890217533	9.241863296111	9.114048898009695	9.097591694779409	0.06252924855939682	1	0	1	0	0	0	1	1	0	1	1	6
10110010110	9.408631659707966	9.414661920109141	9.480571535309233	9.434621705042114	0.016292284402487884	8.95778639864339	9.271549200155592	9.364150156951858	9.19782858525028	0.08694722806886808	1	0	1	1	0	0	1	0	1	1	0	6
10100001111	9.240887466840487	9.080178119401907	9.112034758461258	9.144366781567884	0.03473925104057154	8.184943877788013	9.149432355445972	8.836395070052612	8.723590434428866	0.20087440945667034	1	0	1	0	0	0	0	1	1	1	1	6
10001111001	9.214977371468931	9.309457182243687	9.244983462326916	9.256472672013176	0.019708754888033808	9.458820416984572	9.504140279091935	9.50498125432844	9.489313983468316	0.010782470399611279	1	0	0	0	1	1	1	1	0	0	1	6
11010111010	9.401681950855801	9.427860881014732	9.447721602261302	9.42575481137728	0.009427256779973667	9.959284733745632	9.961427138366435	10.003020181384931	9.974577351165665	0.010065563550635339	1	1	0	1	0	1	1	1	0	1	0	7
10010010110	9.424833878958774	9.46334489786361	9.43725087339845	9.441809883406945	0.008024577594961401	8.414476977892399	9.228472186648231	9.292537498126674	8.978495554222436	0.19983902140962015	1	0	0	1	0	0	1	0	1	1	0	5
10010101010	8.548311045505733	8.698936583434401	8.472765817622559	8.573337815520897	0.04700719491032331	8.394500586974956	8.990819189484256	9.227240229379534	8.870853335279582	0.17519402702875783	1	0	0	1	0	1	0	1	0	1	0	5
11101101011	9.308115009071308	9.40161722622543	9.404235747367194	9.371322660887976	0.022353670837155636	9.764388536790689	9.795352569271444	9.658691322619948	9.73947747622736	0.029253190104891733	1	1	1	0	1	1	0	1	0	1	1	8
11010101010	9.338349990880694	9.42498273312962	9.410392003346796	9.391241575785703	0.018935690130111843	9.47474093260083	9.527772718289103	9.449002621750708	9.483838757546879	0.016397458345877764	1	1	0	1	0	1	0	1	0	1	0	6
11010000000	9.46918268576781	9.437838081263283	9.329955085674966	9.412325284235353	0.029816824853440678	8.695016296663658	9.257675484479096	9.225135924930381	9.059275902024378	0.12895638849824828	1	1	0	1	0	0	0	0	0	0	0	3
10100011101	9.450706516694508	9.403529639128108	9.459602249028414	9.437946134950343	0.012302810667692966	8.605258221890915	9.283737330727396	9.074915917167177	8.987970489928495	0.14186443397963525	1	0	1	0	0	0	1	1	1	0	1	6
10011001101	8.708194502333953	8.972141915286628	8.687484133299064	8.789273516973216	0.0647918052594553			7.0	7.0	0.0	1	0	0	1	1	0	0	1	1	0	1	6
00000001010	7.0	7.0	7.0	7.0	0.0	7.0	7.0	7.0	7.0	0.0	0	0	0	0	0	0	0	1	0	1	0	2
11111111011	9.435500499554342	9.454886437526412	9.510407349243373	9.466931428774709	0.015872252482516058	9.987392296539946	9.9932267762504	10.034565680196714	10.00506158432902	0.010499039980719386	1	1	1	1	1	1	1	1	0	1	1	10
11110011010	9.508708149958487	9.553033279650077	9.540261300507076	9.534000910038547	0.00931462691288906	9.749739069693176	9.75409889749817	9.664451340499372	9.722763102563572	0.02063552043159342	1	1	1	1	0	0	1	1	0	1	0	7
11011111000	9.428765221834725	9.432650300515366	9.450529488501989	9.43731500361736	0.004738853890327848	9.911109458067775	9.912920589895986	9.932102046983573	9.918710698315778	0.004748968554356967	1	1	0	1	1	1	1	1	0	0	0	7
11011101011	9.388171331707893	9.457349049225034	9.415677393755578	9.420399258229502	0.014219183950464613	9.718322184333628	9.681569387742764	9.617928695238986	9.672606755771794	0.020736279568405125	1	1	0	1	1	1	0	1	0	1	1	8
10111111110	9.341640355497557	9.31952872704147	9.363403354920974	9.341524145820001	0.008955965157443938	10.000765592852698	9.974593020993982	9.80737014429317	9.927576252713283	0.042833752764916494	1	0	1	1	1	1	1	1	1	1	0	9
00001101010	7.0	7.0	7.0	7.0	0.0	7.0	7.0	7.0	7.0	0.0	0	0	0	0	1	1	0	1	0	1	0	4
01100001101	7.438786728534954	7.912856475305262		7.6758216019201075	0.13685214795624775			7.0	7.0	0.0	0	1	1	0	0	0	0	1	1	0	1	5
00100110010	7.966746426285209	8.25768851046804	7.572794650624893	7.93240986245938	0.14032946324289544	8.416055806818848	8.829868609349687	8.918043673929205	8.721322696699247	0.10941862733430338	0	0	1	0	0	1	1	0	0	1	0	4
10100000001	8.415863831009066	8.63936153981562	8.470585531976871	8.508603634267187	0.047560204892960874			7.0	7.0	0.0	1	0	1	0	0	0	0	0	0	0	1	3
10101011001	9.410549770147867	9.466351172768276	9.456458572472783	9.44445317179631	0.012155563662052497	8.732918030238897	9.229038703451833	9.081284212677387	9.014413648789372	0.10399333699276112	1	0	1	0	1	0	1	1	0	0	1	6
00101111001	8.625224694408603	8.975539369993088	8.612487212267993	8.73775042555656	0.08411128286878718	9.373972100089198	9.372153558507307	9.46250020744889	9.402875288681798	0.021083860244501453	0	0	1	0	1	1	1	1	0	0	1	6
11010110010	9.400737223945255	9.399848413730133	9.391081923895301	9.397222520523563	0.0021785963031613746	9.969842155129188	9.766914379670931	9.851056797415644	9.862604444071922	0.04162317387502386	1	1	0	1	0	1	1	0	0	1	0	6
10110001100	8.696736026611745	8.887635354335202	8.57001327908985	8.718128220012266	0.06527399319363358		7.0	7.0	7.0	0.0	1	0	1	1	0	0	0	1	1	0	0	5
01101010100	9.078206042907446	9.242032175044613	9.103669934454468	9.141302717468841	0.03599055468872217	8.781780705054452	9.204175791343644	9.290154350014207	9.0920369488041	0.11108726354162467	0	1	1	0	1	0	1	0	1	0	0	5
11010101011	9.377262430946953	9.416184926765547	9.397592047464805	9.397013135059103	0.00794765714814996	9.750889759794463	9.755875255403168	9.636230024454699	9.71433167988411	0.027631851268741025	1	1	0	1	0	1	0	1	0	1	1	7
10001001110	8.948111605505169	8.993078886324051	8.929576043785705	8.956922178538308	0.013331494042877803	7.699447124240915	8.672753607587705		8.18610036591431	0.2809693800821387	1	0	0	0	1	0	0	1	1	1	0	5
00011101110	7.0	7.0	7.0	7.0	0.0	7.313911353826513			7.313911353826513	0.0	0	0	0	1	1	1	0	1	1	1	0	6
11100001100	9.409613480939935	9.311352079168048	9.394179109215203	9.371714889774395	0.02157277078424584	8.572341589134865	9.183836122745888	8.910633792822297	8.88893716823435	0.1250562865259235	1	1	1	0	0	0	0	1	1	0	0	5
10111101101	9.251930493846727	9.192278076685458	9.159529818907576	9.201246129813253	0.019125857998095564	9.346380198363713	9.367983966723195	9.172515556342065	9.295626573809656	0.043749138407253196	1	0	1	1	1	1	0	1	1	0	1	8
00010011011	8.799252176725588	8.957570429304747	8.538876270931798	8.765232958987378	0.08630776321354086	7.0	7.0	7.0	7.0	0.0	0	0	0	1	0	0	1	1	0	1	1	5
11111111000	9.42403618366449	9.43222843673857	9.457025998311305	9.437763539571455	0.007012607576545769	9.964053492531091	9.913021242109805	9.9565347276425	9.944536487427799	0.011247525446014695	1	1	1	1	1	1	1	1	0	0	0	8
11100010101	9.527793444577187	9.598203935177944	9.615312229627655	9.580436536460928	0.0189369338289605	9.3733626499321	9.416597636372584	9.390840449786817	9.393600245363833	0.008879079971553159	1	1	1	0	0	0	1	0	1	0	1	6
10111101000	8.139023994832481	8.403568327658418	8.25234653966495	8.264979620718615	0.05418428748302921	8.46960503816563	8.858058900145274	9.020849461664016	8.78283779999164	0.11562242000059147	1	0	1	1	1	1	0	1	0	0	0	6
11011001111	9.468965212509506	9.43953110116284	9.55163090118624	9.486709071619527	0.02372665411658648	9.314191966905648	9.43083671955801	9.180447529738867	9.308492072067509	0.05115019256308847	1	1	0	1	1	0	0	1	1	1	1	8
11011011001	9.536476460105396	9.51822464176143	9.56145306883052	9.538718056899116	0.008859484502085187	9.722876231200432	9.81184687604827	9.648842136045497	9.727855081098065	0.03331973395644655	1	1	0	1	1	0	1	1	0	0	1	7
10110101000	8.16808806180898	8.264097911644617	8.034481062757449	8.155555678737016	0.04707931214506548	8.254080389091916	8.955791820785599	8.818165996991508	8.67601273562301	0.15179777975466544	1	0	1	1	0	1	0	1	0	0	0	5
00110101000	7.0	7.0	7.0	7.0	0.0	7.0	7.0	7.0	7.0	0.0	0	0	1	1	0	1	0	1	0	0	0	4
11101011001	9.504122216288849	9.525288364871283	9.575032485365886	9.534814355508672	0.014861162686469014	9.720424044245732	9.851962206060437	9.681966536731132	9.751450929012433	0.03639283945463317	1	1	1	0	1	0	1	1	0	0	1	7
11100001111	9.395907746414297	9.422794705073514	9.448403432382094	9.422368627956635	0.010716695833989823	9.309332636910538	9.4542247396139	9.151368342881245	9.304975239801895	0.06183949579710873	1	1	1	0	0	0	0	1	1	1	1	7
00110110010	8.209255781123533	8.65968669513343	8.159604224312401	8.342848900189788	0.11247663498256309	8.059348189252088	8.423222516083984	8.310559864684954	8.264376856673676	0.07604908952289603	0	0	1	1	0	1	1	0	0	1	0	5
00001001011	7.0	7.0	7.0	7.0	0.0	7.0	7.0	7.0	7.0	0.0	0	0	0	0	1	0	0	1	0	1	1	4
10010001110	9.110340401354208	9.070154136294072	9.011835384415534	9.064109974021271	0.02022048677994287	7.571760987748972	8.25081774189556		7.911289364822266	0.19602679990078306	1	0	0	1	0	0	0	1	1	1	0	5
11011000001	9.50358772644915	9.587208457242765	9.501936866055633	9.530911016582516	0.019907003389429	8.927797728362604	9.156054961549268	9.216600211174717	9.100150967028862	0.0621767118409474	1	1	0	1	1	0	0	0	0	0	1	5
11001010111	9.508812177367908	9.534198547287268	9.576695881737914	9.53990220213103	0.014002666940510354	9.819666540404654	9.74631510115325	9.673483979750957	9.746488540436287	0.029839453247634654	1	1	0	0	1	0	1	0	1	1	1	7
11001011001	9.504595288139443	9.541781750107699	9.508566726959726	9.51831458840229	0.00833640450530774	9.700740505718716	9.757996004364626	9.681125440727444	9.713287316936928	0.016306122277044872	1	1	0	0	1	0	1	1	0	0	1	6
10110001000	8.01806024029205	7.857125545354223		7.937592892823137	0.046457844722152225	7.0	7.0	7.0	7.0	0.0	1	0	1	1	0	0	0	1	0	0	0	4
01111000000	7.7000788731564676	8.181613427830587	7.959721114791908	7.947137805259654	0.09839345895890735						0	1	1	1	1	0	0	0	0	0	0	4
00011100101	7.0	7.0	7.0	7.0	0.0	7.5029319359581885			7.5029319359581885	0.0	0	0	0	1	1	1	0	0	1	0	1	5
11101000011	9.43182148502403	9.494841505617245	9.435391793897674	9.454018261512983	0.014451584231267108	9.303570501485275	9.405935802821515	9.244468405587863	9.317991569964885	0.03335142551781632	1	1	1	0	1	0	0	0	0	1	1	6
11000001110	9.409554142111425	9.396203311754132	9.505457875557516	9.437071776474356	0.024331238763730563	9.252415570833351	9.360107316784756	9.114832380672782	9.242451756096962	0.05019031575622769	1	1	0	0	0	0	0	1	1	1	0	5
11010110000	9.381822864730168	9.392776713938147	9.421866338448364	9.398821972372227	0.00844865678679229	9.828992928299053	9.696457960422254	9.791121760900053	9.772190883207122	0.02786922742977341	1	1	0	1	0	1	1	0	0	0	0	5
10011000100	8.648311111052262	8.756410016249164	8.557179947222023	8.653967024841151	0.04071680063096472			7.0	7.0	0.0	1	0	0	1	1	0	0	0	1	0	0	4
11100111010	9.361696054938015	9.402353066324752	9.451438528332034	9.405162549864933	0.018345516168994085	10.002105409102278	9.98879080187673	10.040291072100937	10.010395761026649	0.010913423764367797	1	1	1	0	0	1	1	1	0	1	0	7
00010001100	7.0	7.0	7.0	7.0	0.0	7.0	7.0	7.0	7.0	0.0	0	0	0	1	0	0	0	1	1	0	0	3
11001101111	9.380233925736992	9.359321523408335	9.49087761073385	9.41014435329306	0.028860949064839995	10.076977700485227	9.999056586405931	9.956314048411043	10.010782778434068	0.02497684566947435	1	1	0	0	1	1	0	1	1	1	1	8
00110110001	8.551073839501495	8.806169806752518	8.385128069525349	8.580790571926455	0.08658459183685681	8.75014809251341	9.06626634652388	9.21792018230713	9.011444873781473	0.09743093913359956	0	0	1	1	0	1	1	0	0	0	1	5
11111101111	9.4284123582424	9.428241904766457	9.479227654283433	9.445293972430763	0.011997418726928211	10.012847734990512	9.980024277060293	9.929536827653322	9.974136279901375	0.017132708499845176	1	1	1	1	1	1	0	1	1	1	1	10
10011001010	8.393034158710687	8.27807064252944	8.478034323490563	8.38304637491023	0.0409698777453507		7.0	7.0	7.0	0.0	1	0	0	1	1	0	0	1	0	1	0	5
01100000011	8.276235590273597	8.991628779588172	8.191987202373168	8.48661719074498	0.17937482932182358	8.55867360405871	9.062630573593564	9.168123292664287	8.929809156772187	0.13297141128214202	0	1	1	0	0	0	0	0	0	1	1	4
10001111000	9.172062855993275	9.2862727656391	9.21049816480456	9.222944595478978	0.023724674541943176	9.379003395067793	9.332112761791322	9.42760637692434	9.379574177927816	0.01949359714367002	1	0	0	0	1	1	1	1	0	0	0	5
11100101111	9.3317498771104	9.388121704752557	9.406349630058891	9.375407070640616	0.015877275298595474	10.058585835022352	9.982683304232138	9.955389223616812	9.998886120957101	0.02182996260404327	1	1	1	0	0	1	0	1	1	1	1	8
11000011010	9.462648242629232	9.508747118772336	9.488980313627367	9.486791891676312	0.009441649647450373	9.776061937872091	9.732470435797325	9.734791313783884	9.747774562484434	0.010012311782657395	1	1	0	0	0	0	1	1	0	1	0	5
10101000101	8.817579215697398	8.972549811123239	8.865748362738914	8.885292463186516	0.03237913489267789	7.713754780388008			7.713754780388008	0.0	1	0	1	0	1	0	0	0	1	0	1	5
11101101110	9.345662800765057	9.37953689025985	9.389241559533666	9.371480416852856	0.009340388346417339	10.083743137199733	9.988417019154005	10.023160932212823	10.031773696188855	0.019695185422234182	1	1	1	0	1	1	0	1	1	1	0	8
00111001001	7.0	7.0	7.0	7.0	0.0	7.0	7.0	7.0	7.0	0.0	0	0	1	1	1	0	0	1	0	0	1	5
10011010101	9.440488198580157	9.417666462254292	9.502305918295793	9.45348685971008	0.01787774814831846	8.093032375820778	9.032241233926095		8.562636804873437	0.271126243526193	1	0	0	1	1	0	1	0	1	0	1	6
00111111000	8.742094951311211	8.916982498681074	8.87953254831576	8.846203332769349	0.03759330838718933	9.141550492489324	9.29549814472841	9.365738988167738	9.26759587512849	0.04681350034135004	0	0	1	1	1	1	1	1	0	0	0	6
10011111011	9.325042859885984	9.31160076818234	9.367140594754176	9.334594740940833	0.011829320265565399	9.504900809110783	9.538962135874119	9.475259563827985	9.506374169604294	0.013013662786222735	1	0	0	1	1	1	1	1	0	1	1	8
10111011001	9.466538511235322	9.503216150029447	9.570633679399288	9.513462780221353	0.021554953342129646	8.620794600877575	9.298027330735199	9.13188986514764	9.016903932253472	0.1440933529407578	1	0	1	1	1	0	1	1	0	0	1	7
10101010100	9.427288815827822	9.38432733914038	9.493829687033992	9.435148614000731	0.0225241476680863	7.731965993602122	8.589099346070523		8.160532669836321	0.24743308588951868	1	0	1	0	1	0	1	0	1	0	0	5
10111110011	9.275069937634173	9.27289785842832	9.313534072944288	9.287167289668927	0.009332603488456433	9.139817333779511	9.289552081467797	9.117560046085321	9.18230982044421	0.03818709124377813	1	0	1	1	1	1	1	0	0	1	1	8
11110001000	9.385768852738313	9.36185028619458	9.293121848687614	9.346913662540167	0.019634976803898033	8.61204006686055	9.334994690132595	9.055079246386704	9.000704667793283	0.14881940561494622	1	1	1	1	0	0	0	1	0	0	0	5
10100101111	9.240235448852248	9.185736288277273	9.227026080247805	9.217665939125775	0.01160638335294042	9.638083997162752	9.652098931580484	9.538930479734422	9.609704469492552	0.02518538867543498	1	0	1	0	0	1	0	1	1	1	1	7
10000001000	7.336556110877159	7.629116198540121	7.0	7.321890769805759	0.12852243772194577	7.0	7.0	7.0	7.0	0.0	1	0	0	0	0	0	0	1	0	0	0	2
01110011000	8.966974129541574	9.179988962404458	9.064531767453516	9.070498286466517	0.043532610892582486			7.0	7.0	0.0	0	1	1	1	0	0	1	1	0	0	0	5
00101001110	7.514400374412304	7.755328073247648		7.634864223829976	0.06954983588891159	7.0	7.0	7.0	7.0	0.0	0	0	1	0	1	0	0	1	1	1	0	5
11110110000	9.413621499924993	9.41845872354004	9.404854723406695	9.412311648957242	0.002815255674454787	9.809013318134461	9.785263744094458	9.779151251515383	9.7911427712481	0.006440211899923734	1	1	1	1	0	1	1	0	0	0	0	6
10111011010	9.390785119906438	9.435870302914713	9.45025516657611	9.42563686313242	0.01266697859302288	8.910744401368852	9.248026317549733	9.123946474521992	9.094239064480192	0.06964394015778337	1	0	1	1	1	0	1	1	0	1	0	7
11110010111	9.547910171538824	9.578129358803382	9.603580775388037	9.576540101910082	0.011377597405564823	9.747683483338212	9.655279822108886	9.688131816826392	9.697031707424497	0.01912247888236821	1	1	1	1	0	0	1	0	1	1	1	8
10111101100	9.190631336043456	9.111520449997126	9.14481300882026	9.148988264953614	0.016215772391888372	9.298731809042161	9.296346395305171	9.208166098910288	9.267748101085873	0.02107104564369772	1	0	1	1	1	1	0	1	1	0	0	7
11011101001	9.40969829652979	9.436327858423567	9.440992756510273	9.42900630382121	0.0068925041133343756	9.27901759828374	9.272243409210068	9.31014972575899	9.287136911084266	0.008252925126294613	1	1	0	1	1	1	0	1	0	0	1	7
11101011111	9.51041578609499	9.5503953902227	9.53778569849255	9.532865624936747	0.008344134960138118	9.613411096063569	9.681402737151883	9.597641108312047	9.630818313842498	0.018171686032479022	1	1	1	0	1	0	1	1	1	1	1	9
11111001101	9.52830647533838	9.455876449243931	9.52605190072179	9.503411608434702	0.01681251664754711	9.03155047718032	9.267541349096255	9.001596166681137	9.100229330985904	0.05946889765876116	1	1	1	1	1	0	0	1	1	0	1	8
10100101110	9.190985827458316	9.097443694761939	9.191981197078043	9.160136906432767	0.0221663287532101	9.562975555252203	9.518463235355537	9.450964932332317	9.51080124098002	0.023023989409899817	1	0	1	0	0	1	0	1	1	1	0	6
10101001100	8.388647742468843	8.24374208039659	8.576565060722658	8.402984961196031	0.06812604854104988	7.0	7.0	7.0	7.0	0.0	1	0	1	0	1	0	0	1	1	0	0	5
00111010101	8.888291850569411	9.129047806651633	8.907532883582594	8.974957513601213	0.05462053665537482	7.0		7.0	7.0	0.0	0	0	1	1	1	0	1	0	1	0	1	6
00111000100	7.0		7.0	7.0	0.0	7.0	7.0	7.0	7.0	0.0	0	0	1	1	1	0	0	0	1	0	0	4
11101011100	9.504118353359749	9.514017175294768	9.58176851355373	9.53330134740275	0.017254450222842964	9.342025158681114	9.522664722292397	9.27172017406037	9.378803351677961	0.052848475509278785	1	1	1	0	1	0	1	1	1	0	0	7
10111011000	9.39405751619208	9.451745990101367	9.524230584437658	9.456678030243701	0.026628620846410243	8.236705413363563	8.935966639183347	8.774513323597953	8.649061792048286	0.1494685756047428	1	0	1	1	1	0	1	1	0	0	0	6
00100101001	7.0	7.0	7.0	7.0	0.0	8.606443754238402	8.885107946871873	8.742460936228717	8.744670879112997	0.0568874560714397	0	0	1	0	0	1	0	1	0	0	1	4
11110110011	9.45911865133507	9.449484724401957	9.536872034687963	9.48182513680833	0.019561117306475737	9.945578972080233	9.953484178867523	9.942548963508498	9.947204038152085	0.0023048992581194017	1	1	1	1	0	1	1	0	0	1	1	8
11110100011	9.367028752760637	9.400261904793851	9.346830758886584	9.371373805480358	0.01101424419099923	9.843758561707565	9.75297164862592	9.7284056878339	9.775045299389127	0.024805933165409157	1	1	1	1	0	1	0	0	0	1	1	7
10100110000	9.139798164947956	9.16088097572368	9.212576172365132	9.17108510434559	0.015287537253173342	9.149811219438556	9.211492688961117	9.268721116842467	9.21000834174738	0.024278053842034613	1	0	1	0	0	1	1	0	0	0	0	4
10101011111	9.427067672977776	9.434000085262234	9.44539610776942	9.435487955336477	0.003778077079156023	8.779104726923153	9.18899681883817	9.174287538826155	9.047463028195827	0.09492648394598492	1	0	1	0	1	0	1	1	1	1	1	8
10110101110	9.269778106774783	9.226987250656643	9.20607206074742	9.23427913939295	0.013257034649052818	9.468464544645768	9.50319697929368	9.317696540759488	9.429786021566311	0.04025879672982522	1	0	1	1	0	1	0	1	1	1	0	7
10010101000	8.359379908294438	8.624284585334415	8.267718496106365	8.417127663245072	0.0755931504814042	8.191620340088487	8.716672274430382	8.573959915381339	8.494084176633402	0.11083394761942869	1	0	0	1	0	1	0	1	0	0	0	4
11100000100	9.407445850937595	9.462963410117931	9.443012372793127	9.437807211282886	0.011480927111927193	9.10947730426552	9.204838458567286	9.115604085837298	9.143306616223368	0.021790709334426162	1	1	1	0	0	0	0	0	1	0	0	4
11011001101	9.480552248986033	9.493582529791391	9.508994181061496	9.494376319946307	0.005812464367687814	9.050161619995734	9.266020277728543	9.014667289062821	9.110283062262367	0.05553605749565274	1	1	0	1	1	0	0	1	1	0	1	7
10100110001	9.24045187579908	9.220545928932347	9.217043976226336	9.226013926985921	0.005154394446122807	9.362871497794425	9.399795838418227	9.350719169314004	9.371128835175552	0.010434458763001317	1	0	1	0	0	1	1	0	0	0	1	5
10111101111	9.290006567934018	9.220006977211789	9.266935081145677	9.258982875430496	0.014562588237914904	9.561690847742598	9.541843012001165	9.377185609340804	9.493573156361522	0.04134817604205702	1	0	1	1	1	1	0	1	1	1	1	9
11111000111	9.497611276205543	9.50705963491359	9.56710091743227	9.523923942850468	0.01538671624647491	9.746834108286633	9.699626718374333	9.617760567353637	9.688073798004867	0.02666176169174018	1	1	1	1	1	0	0	0	1	1	1	8
11101001100	9.48054473906932	9.224535075043878	9.312031214943065	9.339037009685422	0.05312284776950896	8.890875386040094	9.248146449953524	9.070130963890172	9.069717599961264	0.07292779697500106	1	1	1	0	1	0	0	1	1	0	0	6
10100001110	9.050059462883606	9.048032413287702	8.99654296184986	9.031544946007058	0.01238198559548989	7.819877151683768	8.901662534256449		8.360769842970107	0.31228454091686986	1	0	1	0	0	0	0	1	1	1	0	5
01100110001	9.35459699234816	9.462445108562916	9.316283299622963	9.377775133511346	0.030940098763538888	9.669661398002726	9.700639983157359	9.677835568718047	9.682712316626043	0.006554326651969823	0	1	1	0	0	1	1	0	0	0	1	5
11010011001	9.525504935189607	9.581114469796068	9.581323931117607	9.562647778701093	0.013132047863911731	9.643550674586967	9.720955834501977	9.557885721175973	9.640797410088306	0.033300777803950854	1	1	0	1	0	0	1	1	0	0	1	6
00010001000	7.0	7.0	7.0	7.0	0.0	7.0	7.0	7.0	7.0	0.0	0	0	0	1	0	0	0	1	0	0	0	2
11101010101	9.505741992592883	9.536927107649927	9.602385702999277	9.548351601080697	0.020136579392947933	9.35618261804446	9.462839622149184	9.36316441984754	9.394062220013728	0.024358211047068146	1	1	1	0	1	0	1	0	1	0	1	7
01101001101	7.695606236445372	7.9464730618297335		7.821039649137553	0.07241901458320386			7.0	7.0	0.0	0	1	1	0	1	0	0	1	1	0	1	6
11111011101	9.563946502888813	9.547249183757716	9.65234518291768	9.587846956521403	0.02305687179830369	9.427998111821404	9.532589954200368	9.382247338153864	9.447611801391878	0.03146227413864602	1	1	1	1	1	0	1	1	1	0	1	9
10011000000	7.999511226969621	8.31406159724835		8.156786412108985	0.09080287047706011	7.0		7.0	7.0	0.0	1	0	0	1	1	0	0	0	0	0	0	3
10110011010	9.428531717871095	9.418881225173823	9.515912890127632	9.454441944390851	0.021822354286586527	8.596363394911599	9.204643169034217	9.238307210727244	9.013104591557687	0.1475004156278254	1	0	1	1	0	0	1	1	0	1	0	6
00110001101	7.0	7.0	7.0	7.0	0.0	7.0	7.0	7.0	7.0	0.0	0	0	1	1	0	0	0	1	1	0	1	5
11001001111	9.396837609266928	9.411460449625027	9.450974529626613	9.41975752950619	0.011433377216316527	9.413001893604537	9.40074845578296	9.165413606348649	9.326387985245383	0.05696797299141512	1	1	0	0	1	0	0	1	1	1	1	7
11100001110	9.416108068243467	9.390799005658085	9.466334792491342	9.424413955464297	0.015695830630158166	9.306005684669778	9.351976870229024	8.975579689305288	9.211187414734697	0.08382679333696082	1	1	1	0	0	0	0	1	1	1	0	6
00110001001	7.0	7.0	7.0	7.0	0.0	7.0	7.0	7.0	7.0	0.0	0	0	1	1	0	0	0	1	0	0	1	4
00101001000	7.0	7.0	7.0	7.0	0.0	7.0	7.0	7.0	7.0	0.0	0	0	1	0	1	0	0	1	0	0	0	3
00000111001	8.560465355312237	8.730358342665955	8.507578342529932	8.599467346836041	0.04751946727792861	9.342198139905634	9.382222562827646	9.418157989578065	9.380859564103782	0.015512726037598555	0	0	0	0	0	1	1	1	0	0	1	4
10101000011	8.459346797863427	8.778218687568929	8.490086228137754	8.575883904523371	0.07181080636641396	7.677058507126246			7.677058507126246	0.0	1	0	1	0	1	0	0	0	0	1	1	5
10101000010	8.293404303945872	8.596566840017546	8.522242123360389	8.470737755774602	0.06450633784063547						1	0	1	0	1	0	0	0	0	1	0	4
10000001010	8.179112775860684		8.125231586954651	8.152172181407668	0.015554159459577518	7.0	7.0	7.0	7.0	0.0	1	0	0	0	0	0	0	1	0	1	0	3
10011111000	9.245964358867244	9.275653129922741	9.270075091792176	9.26389752686072	0.006441758469266367	9.229009189929227	9.383185019269977	9.38581382057033	9.33266934325651	0.03665332679295343	1	0	0	1	1	1	1	1	0	0	0	6
01101000110	9.167758773253468	9.289294509292118	9.28005310099562	9.24570212784707	0.02762162739836148	9.169608092422148	9.365926917414992	9.339987058508001	9.29184068944838	0.043538919183227276	0	1	1	0	1	0	0	0	1	1	0	5
00111001011	7.0	7.0	7.0	7.0	0.0	7.0	7.0	7.0	7.0	0.0	0	0	1	1	1	0	0	1	0	1	1	6
00100001100	7.0	7.0	7.0	7.0	0.0	7.0	7.0	7.0	7.0	0.0	0	0	1	0	0	0	0	1	1	0	0	3
10000101010	8.303752522975152	8.488343599772895	8.28332308413298	8.358473068960343	0.04610514536181051	8.497505675814327	9.100036619782381	9.107201737858773	8.90158134448516	0.14286980917260408	1	0	0	0	0	1	0	1	0	1	0	4
11110010110	9.532966244088195	9.544539297642258	9.58722341337543	9.55490965170196	0.01166632109434825	9.638759770827289	9.606748849029783	9.660809474310092	9.635439364722387	0.011097346709541238	1	1	1	1	0	0	1	0	1	1	0	7
11100000001	9.337889836979812	9.430096500282982	9.226143604026992	9.331376647096596	0.041695347871280826	8.846712113418718	9.194455586189266	9.124762864197649	9.055310187935211	0.07511007077798268	1	1	1	0	0	0	0	0	0	0	1	4
10110010111	9.442950272503005	9.437317301835938	9.497565195132195	9.459277589823714	0.013585458707920016	8.989981929569709	9.30383134009783	9.14565745670368	9.14649024212374	0.06406491924977242	1	0	1	1	0	0	1	0	1	1	1	7
11011001011	9.466055120543652	9.500745010197292	9.426163630117903	9.464321253619616	0.015236197494340341	9.22204647445183	9.299557394555004	9.090359828196515	9.203987899067782	0.043176941282847055	1	1	0	1	1	0	0	1	0	1	1	7
11001001001	9.398243165729317	9.372068461051807	9.260889348535398	9.343733658438842	0.0297732081850219	9.039727228036993	9.202764442316754	8.938522629877571	9.060338100077105	0.05442814819401278	1	1	0	0	1	0	0	1	0	0	1	5
10111010100	9.399081326415311	9.428262979273043	9.500636916873253	9.442660407520536	0.02134576048235948		8.63940450474082		8.63940450474082	0.0	1	0	1	1	1	0	1	0	1	0	0	6
10011010100	9.422325487348079	9.372319339845248	9.442813396890099	9.412486074694476	0.014804073486074643						1	0	0	1	1	0	1	0	1	0	0	5
10001001001	7.91386071724599	7.87660401641743	7.918181131025653	7.902881954896358	0.009332416905904048	7.0	7.0	7.0	7.0	0.0	1	0	0	0	1	0	0	1	0	0	1	4
10110101011	8.793933825505588	8.983944518726606	8.758333609381497	8.845403984537896	0.049517595453518866	8.736014890009004	9.125141829194154	9.091482083194377	8.984212934132513	0.08801983342334778	1	0	1	1	0	1	0	1	0	1	1	7
10101001010	8.289737387476858	8.39889453873369	8.467010698084867	8.385214208098471	0.03650757968832756			7.0	7.0	0.0	1	0	1	0	1	0	0	1	0	1	0	5
10100101000	7.932305818194777	8.015642422317514	7.520952808360722	7.822967016291005	0.10812468399991929	8.489155145289415	9.061737581416056	9.134128553762217	8.895007093489228	0.14424918608233367	1	0	1	0	0	1	0	1	0	0	0	4
10101010101	9.448544607730364	9.402751866812078	9.49489951742133	9.448731997321259	0.018809677094274717	8.543164132400719	9.252241615937873	9.040500318210057	8.945302022182883	0.14860168016642336	1	0	1	0	1	0	1	0	1	0	1	6
10010001010	8.338843463725635	8.34756262240747	8.493914372835299	8.393440152989468	0.035567559124036675	7.0	7.0	7.0	7.0	0.0	1	0	0	1	0	0	0	1	0	1	0	4
11010111001	9.499840852465569	9.479206150031477	9.504229483861373	9.494425495452807	0.00545491181829684	9.990549796315477	9.983322704280528	9.984828607098189	9.986233702564732	0.001556622132106318	1	1	0	1	0	1	1	1	0	0	1	7
11011111001	9.435358787171221	9.474081411208633	9.538989477110707	9.482809891830188	0.021377440425224353	10.024278058548184	9.950119313565596	9.984460506138843	9.986285959417541	0.015151342482338378	1	1	0	1	1	1	1	1	0	0	1	8
10011110001	9.292971520007027	9.288485134258682	9.272032006299133	9.28449622018828	0.004500914447393936	9.250453422158019	9.290793268083906	9.335921619442	9.29238943656131	0.01745524754956512	1	0	0	1	1	1	1	0	0	0	1	6
10101101111	9.270991170678698	9.183137050915716	9.195465570235113	9.216531263943176	0.019418243906111986	9.702707814451212	9.661635522432436	9.489034742661207	9.617792693181618	0.0462883906604046	1	0	1	0	1	1	0	1	1	1	1	8
10010000011	8.705241747328138	8.785523114229637	8.608230698853289	8.699665186803687	0.0362433296344698						1	0	0	1	0	0	0	0	0	1	1	4
10001001010	8.215706810713101	8.113420423523213	8.254152340033903	8.194426524756738	0.02969569556064026		7.0	7.0	7.0	0.0	1	0	0	0	1	0	0	1	0	1	0	4
01000000001	7.689834162409595			7.689834162409595	0.0	7.457894532765968			7.457894532765968	0.0	0	1	0	0	0	0	0	0	0	0	1	2
10111101010	8.623557788772134	8.734066005905548	8.46965787486173	8.60909388984647	0.05421380239327155	8.64120910665768	9.059721839008294	9.168963976921066	8.956631640862346	0.11372627407288735	1	0	1	1	1	1	0	1	0	1	0	7
10111010111	9.422159979600762	9.41641205151606	9.529330798328326	9.45596760981505	0.025964327261785696	8.944091728253774	9.185739507285472	9.093123081365217	9.074318105634822	0.04977220210101166	1	0	1	1	1	0	1	0	1	1	1	8
10010001100	8.584765228847342	8.614619703710122	8.687387978465365	8.628924303674276	0.021549645665655058	7.0	7.0	7.0	7.0	0.0	1	0	0	1	0	0	0	1	1	0	0	4
10000011000	9.269519955344476	9.344431848731418	9.300472055995627	9.304807953357175	0.01536797507346323	7.851700859953387	8.24932658858902		8.050513724271203	0.11478466073225173	1	0	0	0	0	0	1	1	0	0	0	3
10110101010	8.596086444039237	8.818200226466598	8.448765807015779	8.621017492507205	0.07592388233402476	8.617268330324372	9.057287848241398	9.178124683693019	8.950893620752929	0.12050571287332207	1	0	1	1	0	1	0	1	0	1	0	6
00100110000	8.016275935204598	8.43065439677049	8.040226492852048	8.162385608275713	0.09497325453625359	8.805648922671814	9.01909584359666	9.31240312230774	9.045715962858738	0.10386804752048594	0	0	1	0	0	1	1	0	0	0	0	3
11010011011	9.528264452627688	9.578199928591383	9.591892290833208	9.566118890684093	0.013672289837264373	9.842733977949724	9.799728398112613	9.713041890672372	9.78516808891157	0.026969153146423792	1	1	0	1	0	0	1	1	0	1	1	7
10100000010	8.340738257087901	8.572183056478693	8.482820471402007	8.4652472616562	0.04765026594336162	7.410576115756142		7.0	7.205288057878072	0.11852311547731985	1	0	1	0	0	0	0	0	0	1	0	3
01110101001	8.632283457449816	8.938829342716346	8.7305071856226	8.767206661929587	0.06390452985295791	8.438142503289209	9.176071579622617	9.163227938055867	8.92581400698923	0.17243784456191472	0	1	1	1	0	1	0	1	0	0	1	6
10101011010	9.387040849429756	9.299147502318947	9.385304025983624	9.357164125910776	0.020515037568686435	8.773428926644321	9.278634932342863	9.256700686799356	9.10292151526218	0.1165792307456348	1	0	1	0	1	0	1	1	0	1	0	6
11111001010	9.471032858550217	9.474806563091628	9.48946467235914	9.478434698000328	0.003975035896242725	9.177578222082172	9.258527515473153	9.0749402783446	9.170348671966641	0.03756165643595998	1	1	1	1	1	0	0	1	0	1	0	7
11101000111	9.494698297297694	9.520420579720126	9.480625038535731	9.498581305184517	0.008238422049828123	9.687449547644896	9.645637421654603	9.604178650975603	9.645755206758368	0.016997651617331296	1	1	1	0	1	0	0	0	1	1	1	7
10011001100	8.517130034987623	8.495239523341942	8.606402383553123	8.539590647294231	0.024040433653442318	7.0	7.0	7.0	7.0	0.0	1	0	0	1	1	0	0	1	1	0	0	5
10111101110	9.288055995359374	9.223672939888234	9.190797641343336	9.234175525530313	0.02019705046681391	9.571231242545439	9.528237388408359	9.412704849416231	9.50405782679001	0.03346924640542088	1	0	1	1	1	1	0	1	1	1	0	8
10100110010	9.207329812639175	9.187518151226223	9.229276167785354	9.208041377216917	0.008527531196555674	9.063594565594938	9.230237224147606	9.267105213539896	9.186979001094146	0.04426737201945181	1	0	1	0	0	1	1	0	0	1	0	5
10000000100	8.476221488609687	8.695698643472412	8.323534155104143	8.498484762395414	0.07637445212061797			7.0	7.0	0.0	1	0	0	0	0	0	0	0	1	0	0	2
11101001000	9.263098722489566	9.303185941064752	9.221246093194583	9.262510252249635	0.01672719537242706	8.761722838677299	9.060125128836717	8.990674491620545	8.937507486378188	0.06374562668388456	1	1	1	0	1	0	0	1	0	0	0	5
11010001101	9.449923108909758	9.46631649775297	9.509559499861853	9.475266368841526	0.01257775765537531	8.955380161843472	9.233121538428062	9.002156642382117	9.06355278088455	0.06070719676451501	1	1	0	1	0	0	0	1	1	0	1	6
10100000101	8.865317056282684	8.997601609249843	8.785212605394921	8.882710423642482	0.04378768693119517	7.7160945610144624			7.7160945610144624	0.0	1	0	1	0	0	0	0	0	1	0	1	4
10010101001	8.387721077345336	8.73765847608699	8.193029529867912	8.439469694433413	0.1126673657223052	8.361366785390548	9.098884589858288	9.041133425283206	8.833794933510681	0.16744405314642083	1	0	0	1	0	1	0	1	0	0	1	5
11110000010	9.4651693115529	9.547720509980275	9.501124330862122	9.504671384131766	0.016897294066517517	9.31945607839384	9.309109083695347	9.276828011972556	9.301797724687248	0.009077260871846385	1	1	1	1	0	0	0	0	0	1	0	5
10110101111	9.28007887775146	9.286472734660247	9.320340377593153	9.295630663334954	0.008833155679822758	9.526559959971884	9.495907284210556	9.430763085833483	9.484410110005308	0.019972477040089955	1	0	1	1	0	1	0	1	1	1	1	8
10101010111	9.374722071834002	9.396447460455596	9.429179841071312	9.40011645778697	0.011191576546963337	9.066745563504488	9.165531101435993	9.044489481123117	9.0922553820212	0.026302191266629915	1	0	1	0	1	0	1	0	1	1	1	7
00101010100	8.874293894750659	9.109074642864737	8.817774270026309	8.933714269213903	0.06306354266394835	7.0	7.0	7.0	7.0	0.0	0	0	1	0	1	0	1	0	1	0	0	4
10110110000	9.215268607935421	9.235703882365572	9.171365767706837	9.20744608600261	0.013421016705787261	9.054461808822523	9.257398605512307	9.25520262437005	9.189021012901627	0.047575974565417664	1	0	1	1	0	1	1	0	0	0	0	5
00111001110	7.968835994890193	8.03976858420655		8.004302289548372	0.020476474768058084			7.0	7.0	0.0	0	0	1	1	1	0	0	1	1	1	0	6
11110101010	9.354791960407864	9.409505764834721	9.403880904262325	9.389392876501637	0.0122870345623001	9.524265589715824	9.533023343070802	9.495804391501801	9.517697774762809	0.007944229917752585	1	1	1	1	0	1	0	1	0	1	0	7
11001001110	9.408944279560492	9.368024382535596	9.513628535359674	9.430199065818586	0.03065661098920947	9.399470751884337	9.418782705752863	9.186436664389968	9.334896707342388	0.05263637233515614	1	1	0	0	1	0	0	1	1	1	0	6
01110000000	7.533963392287163			7.533963392287163	0.0		7.0		7.0	0.0	0	1	1	1	0	0	0	0	0	0	0	3
10100101010	8.202580926573065	8.24246308644765	8.183156429974952	8.209400147665221	0.012343663743802876	8.678358070339629	9.072469206047543	9.085076413030668	8.945301229805947	0.09441373770659116	1	0	1	0	0	1	0	1	0	1	0	5
11011101110	9.387192412897566	9.39977862573975	9.483958256854187	9.423643098497168	0.021478834287702336	9.96506456635424	9.937387563473543	9.908575876834503	9.937009335554094	0.01153148084725464	1	1	0	1	1	1	0	1	1	1	0	8
11110110010	9.370721606198568	9.440804272118934	9.499425571540103	9.436983816619202	0.026306287536847543	9.840984867378344	9.868362644059443	9.85110866209749	9.853485391178426	0.005651287387890227	1	1	1	1	0	1	1	0	0	1	0	7
11110010100	9.5391608793647	9.58266538923583	9.621854907149002	9.581227058583176	0.016887506003441004	9.081237461582418	9.231343858614196	9.367274310986591	9.226618543727735	0.05841092399949478	1	1	1	1	0	0	1	0	1	0	0	6
11001101110	9.385450572876056	9.401047245636876	9.418468079235616	9.401655299249517	0.006743098057121995	10.142598150055463	10.035940150640826	9.954312604657641	10.044283635117976	0.038546664255492816	1	1	0	0	1	1	0	1	1	1	0	7
11001001011	9.44624025316603	9.472016852781028	9.401292405336658	9.439849837094572	0.014612294650696356	9.301062980781982	9.261904617774839	9.17664346794672	9.246537022167848	0.02597170267681091	1	1	0	0	1	0	0	1	0	1	1	6
11111010111	9.521742506485436	9.560611444504165	9.604986672232329	9.562446874407309	0.01700453069489148	9.754715147500182	9.791283565323123	9.683198086703902	9.743065599842403	0.02244401049485775	1	1	1	1	1	0	1	0	1	1	1	9
11101101100	9.287662115007704	9.299409115680973	9.343805719106957	9.310292316598545	0.012088969607129355	9.92749855777023	9.89779121070568	9.859108687645438	9.894799485373783	0.014000038090826769	1	1	1	0	1	1	0	1	1	0	0	7
11001100110	9.37286512806166	9.378291765101713	9.365865515807537	9.372340802990303	0.0025432625197304008	9.990494503623287	9.893997839376338	9.990990489811043	9.958494277603556	0.022803159169190568	1	1	0	0	1	1	0	0	1	1	0	6
10111000011	8.817269618830117	9.029482558051935	8.818350622715498	8.88836759986585	0.0498921598888467	7.7318279868697	8.561902370591186		8.146865178730444	0.23962183444450644	1	0	1	1	1	0	0	0	0	1	1	6
10101101100	9.02809394108094	9.058994887276082	8.91093167250289	8.999340166953305	0.03188720625679518	9.283670500982403	9.351707777364762	9.306376271082637	9.313918183143267	0.014141711780698549	1	0	1	0	1	1	0	1	1	0	0	6
11111101001	9.385618656372909	9.410784575817647	9.37466564558487	9.39035629259181	0.007560623629448428	9.282230649613355	9.340651969973903	9.259587275644892	9.29415663174405	0.01707602097484589	1	1	1	1	1	1	0	1	0	0	1	8
10010001101	8.906035129502268	8.945061371061742	8.675558049837019	8.84221818346701	0.05945931660771566			7.0	7.0	0.0	1	0	0	1	0	0	0	1	1	0	1	5
01101111001	9.294031502716175	9.41640798274001	9.389550519007528	9.366663334821238	0.026257913460323138	9.499382693038177	9.617995403142805	9.525619418018731	9.547665838066571	0.025435464831888688	0	1	1	0	1	1	1	1	0	0	1	7
00100110001	8.230943012778209	8.684188918733364	8.113947271679532	8.343026401063701	0.12296062950922829	9.060241683218829	9.187418156347448	9.2497423709244	9.165800736830226	0.03942949885588795	0	0	1	0	0	1	1	0	0	0	1	4
01110011011	9.206556083300876	9.469065421445752	9.298532442974373	9.324717982573668	0.054378381146056504	7.859810377895613	8.841841118130308		8.35082574801296	0.28348785611349425	0	1	1	1	0	0	1	1	0	1	1	7
11100001001	9.358662082945964	9.354093584490633	9.410044048283957	9.374266571906851	0.012683576365191605	8.852748720439537	9.186024120214887	9.017576142586908	9.018782994413778	0.0680308941980942	1	1	1	0	0	0	0	1	0	0	1	5
00101001100	7.0	7.0	7.0	7.0	0.0	7.0	7.0	7.0	7.0	0.0	0	0	1	0	1	0	0	1	1	0	0	4
10010101011	8.706385077944997	9.039122231690062	8.707901651780096	8.817802987138386	0.07824878167927278	8.677171444946023	9.131682939444064	9.032824126947897	8.947226170445996	0.09758793664834373	1	0	0	1	0	1	0	1	0	1	1	6
00100011001	9.087376649479882	9.390077540059194	9.059398756835547	9.178950982124874	0.07486266116262455	7.0			7.0	0.0	0	0	1	0	0	0	1	1	0	0	1	4
11111001111	9.488090043064377	9.463929117754848	9.55296986515134	9.501663008656855	0.018798194596212438	9.336252402313667	9.456537356868218	9.174267446212953	9.322352401798279	0.05782730486266641	1	1	1	1	1	0	0	1	1	1	1	9
10011000110	9.338965383060211	9.297004349731377	9.385915933936927	9.340628555576172	0.01815852443802682	8.54707912962948	9.201693570286206	9.1804013351794	8.976391345031695	0.15184700279070895	1	0	0	1	1	0	0	0	1	1	0	5
11100001101	9.440726016615711	9.403377375883414	9.426648804852881	9.423584065784002	0.0077003756435188205	8.988983872712863	9.186722007373003	8.83326762637952	9.002991168821795	0.07231833921291342	1	1	1	0	0	0	0	1	1	0	1	6
00011001010	7.0	7.0	7.0	7.0	0.0	7.0	7.0	7.0	7.0	0.0	0	0	0	1	1	0	0	1	0	1	0	4
11010001001	9.500545340590003	9.547747063881094	9.473158064656957	9.507150156376019	0.015403448720930194	8.966833935836016	9.247999034817822	9.032858170889657	9.082563713847831	0.06002282062118446	1	1	0	1	0	0	0	1	0	0	1	5
10101111001	9.219283851461144	9.260069463068481	9.245107860043714	9.241487058191113	0.008423174214510621	9.517843512663257	9.532896720538961	9.516418363601963	9.522386198934727	0.003727399914966022	1	0	1	0	1	1	1	1	0	0	1	7
10010001001	8.257861502976077	8.539230378899669	8.305878283814986	8.367656721896909	0.061447189579763105			7.0	7.0	0.0	1	0	0	1	0	0	0	1	0	0	1	4
11000001100	9.375948391855816	9.323611995924567	9.38651262128638	9.362024336355589	0.01375094941514262	8.6911107315644	9.154149827900165	8.826695878874965	8.890652146113176	0.09718462178858728	1	1	0	0	0	0	0	1	1	0	0	4
10000000000	7.468020702814107	7.601403577631308		7.534712140222707	0.03850431934049858	7.0	7.0	7.0	7.0	0.0	1	0	0	0	0	0	0	0	0	0	0	1
01111001001	7.932591825848384	8.246829776564228	8.073773543285794	8.084398381899469	0.06425345362209244						0	1	1	1	1	0	0	1	0	0	1	6
00001001110	7.436495333215253	7.696099833379374		7.566297583297313	0.07494136402629681	7.0	7.0	7.0	7.0	0.0	0	0	0	0	1	0	0	1	1	1	0	4
10110000110	9.396560380586658	9.382854970354735	9.481490000154231	9.420301783698541	0.021813443645978106	8.513689772327341	9.246649394645807	9.133145657366978	8.964494941446707	0.1610588660359009	1	0	1	1	0	0	0	0	1	1	0	5
00101101001	7.0	7.0	7.0	7.0	0.0	8.46932013554558	8.949488980151205	8.941069922267195	8.786626345987992	0.11219784870405451	0	0	1	0	1	1	0	1	0	0	1	5
10111011110	9.463949385549322	9.416891969200373	9.493475360287508	9.458105571679068	0.015768463083075623	8.851492463272216	9.223750935661077	9.27434370830101	9.116529035744767	0.09427194326508086	1	0	1	1	1	0	1	1	1	1	0	8
11101000110	9.435336047079906	9.50026020251413	9.52672911895794	9.487441789517325	0.01919812135185534	9.578493045349902	9.718279062017551	9.541821030119506	9.61286437916232	0.03801403402334106	1	1	1	0	1	0	0	0	1	1	0	6
11010010101	9.557810893020637	9.615367155642655	9.578491604515154	9.583889884392816	0.011902639139996486	9.27733305980392	9.361582002054991	9.40307031962984	9.34732846049625	0.02615606115975727	1	1	0	1	0	0	1	0	1	0	1	6
10100001100	8.423766767695163	8.218326584481849	8.533879610433935	8.391990987536984	0.06538438039824608	7.0	7.0	7.0	7.0	0.0	1	0	1	0	0	0	0	1	1	0	0	4
11011000100	9.428426246888801	9.511507381241485	9.46939545972243	9.469776362617571	0.016959400228161628	8.920750620156406	9.194428610927462	9.091261139418279	9.068813456834048	0.05642522263753485	1	1	0	1	1	0	0	0	1	0	0	5
10101101001	8.223204474084769	8.41766083288679	8.000400158157019	8.21375515504286	0.08523847418835469	8.897279229445484	9.145487860272516	9.001038341236914	9.014601810318304	0.050891808237997695	1	0	1	0	1	1	0	1	0	0	1	6
10100000110	9.287963522201766	9.227103278214175	9.275899002105492	9.263655267507145	0.013155633154935027	8.80844505784632	9.154513556340168	9.045828329570707	9.0029289812524	0.07225085579314182	1	0	1	0	0	0	0	0	1	1	0	4
10011001001	8.372793012256668	8.552764405513805	8.39952184681508	8.441693088195185	0.039646848965550534			7.0	7.0	0.0	1	0	0	1	1	0	0	1	0	0	1	5
10000101011	8.53002484232163	8.897225186384357	8.541690581695788	8.65631353680059	0.08520841072302739	8.976230120903553	9.132924719525727	9.182305298045938	9.097153379491738	0.04392500471340645	1	0	0	0	0	1	0	1	0	1	1	5
00011001110	7.957502523487591	8.135489192667814		8.046495858077702	0.05138032568168331	7.0		7.0	7.0	0.0	0	0	0	1	1	0	0	1	1	1	0	5
10110001011	8.721897647814139	8.904400705028934	8.615216148021348	8.74717150028814	0.05970204172538346			7.0	7.0	0.0	1	0	1	1	0	0	0	1	0	1	1	6
10010001000	7.9853599035239915			7.9853599035239915	0.0	7.0	7.0	7.0	7.0	0.0	1	0	0	1	0	0	0	1	0	0	0	3
11011111011	9.49923168466714	9.452533951269183	9.513460251259989	9.488408629065438	0.013011901008055294	10.008574091398296	9.950214352520169	10.03679959551028	9.998529346476248	0.01802740391425373	1	1	0	1	1	1	1	1	0	1	1	9
00111111001	8.9010165643696	9.092337750460471	8.817386069844634	8.936913461558236	0.05754135771946543	9.267454902957207	9.371442614959856	9.301647733578374	9.313515083831811	0.021637107644872478	0	0	1	1	1	1	1	1	0	0	1	7
11111101110	9.395327703817493	9.439400219723096	9.499990347471597	9.444906090337396	0.021452673503095612	10.040539156687414	9.948915682461774	9.949015521151571	9.979490120100253	0.02158410349889628	1	1	1	1	1	1	0	1	1	1	0	9
11100101011	9.338340823086645	9.370907487947962	9.380918040149156	9.36338878372792	0.00908848207034966	9.776373970476515	9.835425170164786	9.744703598136491	9.785500912925931	0.018797503010938722	1	1	1	0	0	1	0	1	0	1	1	7
11100010111	9.482068628755199	9.53706897617726	9.538902344983377	9.519346649971945	0.013185082856976104	9.65919649397376	9.665209007359664	9.597860186903972	9.640755229412465	0.015215266911658098	1	1	1	0	0	0	1	0	1	1	1	7
10010110001	9.366707942082996	9.321110258444412	9.331404044656704	9.339740748394705	0.009763133549331561	9.191156477880043	9.365946968100797	9.233436794209751	9.263513413396863	0.03722987405788939	1	0	0	1	0	1	1	0	0	0	1	5
11101011101	9.512972281250589	9.526982470491538	9.582651879800007	9.540868877180712	0.015046792745492771	9.415446087859113	9.61772763447745	9.498386153577703	9.51051995863809	0.04151280514192625	1	1	1	0	1	0	1	1	1	0	1	8
10110111001	9.297227545531863	9.293656722922687	9.374842965074102	9.321909077842884	0.018729143985519846	9.40732045212734	9.445114582630435	9.478293128465053	9.44357605440761	0.014497445168337652	1	0	1	1	0	1	1	1	0	0	1	7
10110010100	9.433198698735318	9.410964646388797	9.504320537268995	9.44949462746437	0.019908116269357998						1	0	1	1	0	0	1	0	1	0	0	5
10101111000	9.207537916251743	9.185873142378089	9.194525793563113	9.19597895073098	0.00445204739539464	9.431418138553807	9.416824340327503	9.473946998607236	9.440729825829516	0.012115968541393445	1	0	1	0	1	1	1	1	0	0	0	6
10111011111	9.481030989981477	9.45354556277775	9.471829560377433	9.46880203771222	0.005711634285373565	8.867620548472491	9.194097901078921	9.158971942410504	9.073563463987306	0.0731639956776901	1	0	1	1	1	0	1	1	1	1	1	9
10100001001	8.29889423096496	8.00092172015857	8.246642063269432	8.182152671464321	0.06495647971348592			7.0	7.0	0.0	1	0	1	0	0	0	0	1	0	0	1	4
01110011001	9.25699690758922	9.431868941762783	9.267843995902142	9.318903281751382	0.04000071892598864	7.7623923194922195	8.795337799808673		8.278865059650446	0.29818567555945574	0	1	1	1	0	0	1	1	0	0	1	6
10110000001	8.634928239619981	8.726018326257522	8.283815870846665	8.548254145574724	0.09532405417554425						1	0	1	1	0	0	0	0	0	0	1	4
10101000110	9.276942625218533	9.257286300031787	9.411575617810527	9.315268181020281	0.0342854064333307	8.733590242108193	9.174881429722383	9.15725754263737	9.021909738155982	0.10199979509777998	1	0	1	0	1	0	0	0	1	1	0	5
11111001100	9.455403147290241	9.39472166995042	9.519340914986207	9.456488577408956	0.025440691412346388	8.629747201583857	9.190435229524274	8.915004108496653	8.911728846534928	0.11445582239057485	1	1	1	1	1	0	0	1	1	0	0	7
10110010101	9.482899218278892	9.466660586621892	9.54538110775471	9.498313637551831	0.01696778002075867	8.01247607764667	8.936239282391352		8.474357680019011	0.26666746746340647	1	0	1	1	0	0	1	0	1	0	1	6
00011001001	7.0	7.0	7.0	7.0	0.0	7.0	7.0	7.0	7.0	0.0	0	0	0	1	1	0	0	1	0	0	1	4
10101001011	8.455563062947594	8.646876723815925	8.556369105463466	8.552936297408996	0.0390705928140865			7.0	7.0	0.0	1	0	1	0	1	0	0	1	0	1	1	6
00111101110	7.0	7.0		7.0	0.0	7.302757926816738			7.302757926816738	0.0	0	0	1	1	1	1	0	1	1	1	0	7
11010000001	9.48190777813442	9.584784516384332	9.510214628444283	9.525635640987678	0.02169585804991687	9.143742430252694	9.250925688832066	9.165174395866076	9.186614171650278	0.023154591766288268	1	1	0	1	0	0	0	0	0	0	1	4
10100101011	8.538839908457176	8.722974053257866	8.429491896845326	8.563768619520124	0.06055166459256601	9.099770188990801	9.23391499640532	9.101423560963653	9.14503624878659	0.03142519489047326	1	0	1	0	0	1	0	1	0	1	1	6
00110001010	7.0	7.0	7.0	7.0	0.0	7.0	7.0	7.0	7.0	0.0	0	0	1	1	0	0	0	1	0	1	0	4
11111010110	9.525476267986047	9.523833137499073	9.610952912426972	9.553420772637365	0.020343448171453005	9.69374421574205	9.695285513164883	9.622207967715676	9.67041256554087	0.017045802699652713	1	1	1	1	1	0	1	0	1	1	0	8
10010000000	7.9171324011204005	8.264870259988012	7.878108704654096	8.020037121920836	0.08692732725610425	7.0	7.0	7.0	7.0	0.0	1	0	0	1	0	0	0	0	0	0	0	2
00110001100	7.0	7.0	7.0	7.0	0.0	7.0	7.0	7.0	7.0	0.0	0	0	1	1	0	0	0	1	1	0	0	4
11111111001	9.4633828059688	9.471743459794821	9.482252879600725	9.472459715121449	0.003860152975989889	9.959149036707432	9.922952498607076	10.009380918764649	9.963827484693052	0.017719498955477857	1	1	1	1	1	1	1	1	0	0	1	9
00110000001	7.0	7.0	7.0	7.0	0.0	7.0	7.0	7.0	7.0	0.0	0	0	1	1	0	0	0	0	0	0	1	3
00101001010	7.0	7.0	7.0	7.0	0.0	7.0	7.0	7.0	7.0	0.0	0	0	1	0	1	0	0	1	0	1	0	4
11010001110	9.46211243965154	9.395749270967405	9.5275779702947	9.461813226971215	0.026909628505278716	9.103021609478741	9.323808594646543	9.059685012154516	9.162171738759932	0.05782786244909979	1	1	0	1	0	0	0	1	1	1	0	6
00110111001	8.919780967711148	9.173440103366378	9.014828965116251	9.03601667873126	0.052317028269186695	9.296783467653409	9.390394076870493	9.386394250290447	9.357857264938117	0.02160827846469865	0	0	1	1	0	1	1	1	0	0	1	6
01110001001	7.980485245715722	8.459692673727114	7.978937985316005	8.13970530158628	0.11313306122356045			7.0	7.0	0.0	0	1	1	1	0	0	0	1	0	0	1	5
11100101010	9.33234953461078	9.305750565860333	9.380536010763226	9.339545370411447	0.015476060717462669	9.593977480260124	9.627360823228653	9.581373017607056	9.600903773698612	0.009701372085685044	1	1	1	0	0	1	0	1	0	1	0	6
11100001010	9.440209171762412	9.422952652867373	9.48525958156425	9.449473802064679	0.0131333758790831	9.17406129989395	9.31793433967314	9.075498354954396	9.189164664840495	0.049774299586848716	1	1	1	0	0	0	0	1	0	1	0	5
11010001010	9.455707474525688	9.446379464699122	9.486447484618814	9.462844807947874	0.008559280551500927	9.098948194930273	9.278772379461016	9.037427896759176	9.138382823716823	0.051199132957020964	1	1	0	1	0	0	0	1	0	1	0	5
10101001111	9.127818012956231	9.073294466117074	9.064407297990057	9.088506592354454	0.01401657519764152	8.299640436975489	9.139099971242091	8.952402674405338	8.79704769420764	0.17994186784530614	1	0	1	0	1	0	0	1	1	1	1	7
11110001010	9.448101960237537	9.49763853979891	9.427141438839486	9.457627312958644	0.014778980395970712	9.191355583050546	9.26804212259885	9.007441145487014	9.155612950378803	0.05467535880181181	1	1	1	1	0	0	0	1	0	1	0	6
10110011011	9.463492362545283	9.47076698708531	9.45879848975221	9.464352613127602	0.0024619184728375365	8.813524762429353	9.201024900555776	9.160765807495377	9.058438490160169	0.08697916337334727	1	0	1	1	0	0	1	1	0	1	1	7
11010011000	9.498803623293947	9.554576452429831	9.515062901792604	9.522814325838795	0.011709793255455282	9.366999000358467	9.41468669704962	9.413612793128713	9.398432830178933	0.011115698810648882	1	1	0	1	0	0	1	1	0	0	0	5
11000000000	9.236988522170186	9.400500129143277	9.198287774135144	9.278592141816203	0.043818955192970854	8.660565616832745	9.275410888613152	9.267529853019646	9.067835452821848	0.14400061756838023	1	1	0	0	0	0	0	0	0	0	0	2
11011010100	9.519835658066166	9.528158198423787	9.515194722675883	9.521062859721946	0.0026814934829489595	9.174564122933225	9.242465180640924	9.325572202334387	9.247533835302844	0.030876443167805353	1	1	0	1	1	0	1	0	1	0	0	6
11110011111	9.543833607770852	9.572984685555364	9.649283748698961	9.588700680675059	0.022230524931541196	9.48264602581679	9.508402947627896	9.332822962956989	9.441290645467225	0.03870784452612477	1	1	1	1	0	0	1	1	1	1	1	9
10101001101	8.762223339571236	8.949093780806601	8.477647601313171	8.729654907230335	0.09691998600959084			7.0	7.0	0.0	1	0	1	0	1	0	0	1	1	0	1	6
11111000100	9.455494475292737	9.553640220569305	9.535134892148072	9.514756529336704	0.021290080171005497	9.057473043093015	9.129137800103118	9.263775408616006	9.150128750604047	0.04276024537522112	1	1	1	1	1	0	0	0	1	0	0	6
11110101000	9.364783496441172	9.404112449482279	9.357618087073726	9.375504677665726	0.010219582746551993	9.173205602038564	9.182280266650963	9.097371883433233	9.15095258404092	0.01903398711369054	1	1	1	1	0	1	0	1	0	0	0	6
10101101110	9.267027514129216	9.114961174512331	9.187504465210946	9.189831051284164	0.031051308783974912	9.636301935084477	9.655204632239831	9.523505335109542	9.60500396747795	0.029071315468394476	1	0	1	0	1	1	0	1	1	1	0	7
10011001110	9.178994943371027	9.039212463920014	9.251783078004244	9.156663495098428	0.04410326269015417	7.939369275473695	8.855966361197497		8.397667818335595	0.264598787090532	1	0	0	1	1	0	0	1	1	1	0	6
00100001001	7.0	7.0	7.0	7.0	0.0	7.0	7.0	7.0	7.0	0.0	0	0	1	0	0	0	0	1	0	0	1	3
00110110000	8.199488950220129	8.721376789938532	8.124283119302202	8.348382953153621	0.13276375067556434	8.379133426663142	9.090183283542713	9.00042841248255	8.823248374229467	0.15808360088290696	0	0	1	1	0	1	1	0	0	0	0	4
11111001000	9.355491407657562	9.389913082922005	9.355039735937613	9.366814742172393	0.008167017110248392	8.276581186577342	9.243110989003117	9.012884921827078	8.844192365802513	0.2061099417737525	1	1	1	1	1	0	0	1	0	0	0	6
11100000011	9.463494343061694	9.431692316913237	9.398739412875413	9.431308690950116	0.01321874062658269	9.28018834320712	9.353021103057914	9.268637867059766	9.300615771108268	0.01867749308379915	1	1	1	0	0	0	0	0	0	1	1	5
11110101001	9.37310130950152	9.414589821128624	9.345023977801848	9.377571702810664	0.014287756715076181	9.409737392270689	9.376362016587533	9.342276683749494	9.376125364202572	0.013770613650142	1	1	1	1	0	1	0	1	0	0	1	7
11101001101	9.414844169862862	9.444048599151039	9.411602754984981	9.423498507999627	0.007295619431676323	9.053139606711609	9.192576459916458	9.041986533446613	9.09590086669156	0.03425571851251759	1	1	1	0	1	0	0	1	1	0	1	7
11101001111	9.410903856827003	9.43234525057366	9.453369471947095	9.432206193115919	0.008668396810775292	9.432181436552618	9.520763338450454	9.159795274117343	9.370913349706806	0.07680041201756647	1	1	1	0	1	0	0	1	1	1	1	8
00101001011	7.0	7.0	7.0	7.0	0.0	7.0	7.0	7.0	7.0	0.0	0	0	1	0	1	0	0	1	0	1	1	5
10011101111	9.293408271083047	9.269992566208575	9.304494411939533	9.289298416410386	0.007190995744488419	9.51377755312509	9.508761864871584	9.441019526283146	9.487852981426608	0.016589749207819075	1	0	0	1	1	1	0	1	1	1	1	8
01110011010	8.935569236200724	9.268203324847496	9.288925003571926	9.164232521540049	0.08095525568580016		8.43711582088317		8.43711582088317	0.0	0	1	1	1	0	0	1	1	0	1	0	6
11100010100	9.47334344118281	9.495184951702322	9.529663696538039	9.499397363141057	0.011592390452479723	9.306819306640325	9.329309869239912	9.21545723720803	9.283862137696088	0.024616658179633294	1	1	1	0	0	0	1	0	1	0	0	5
10111000100	8.807433666359369	8.935845560788868	8.82163099984883	8.854970075665689	0.02874028572110616			7.0	7.0	0.0	1	0	1	1	1	0	0	0	1	0	0	5
10000000001	8.125153161203654	8.512968100510617	8.161539684433183	8.266553648715819	0.08743669739510772			7.0	7.0	0.0	1	0	0	0	0	0	0	0	0	0	1	2
11011010110	9.560162949292977	9.551826210735976	9.563512304051926	9.55850048802696	0.0024567603106200073	9.618533050518172	9.687183462184104	9.62658206288872	9.644099525197	0.015320823899554262	1	1	0	1	1	0	1	0	1	1	0	7
00110011000	9.17415067566045	9.327044447752558	9.110276488772037	9.203823870728348	0.04547428007364593	7.0	7.0	7.0	7.0	0.0	0	0	1	1	0	0	1	1	0	0	0	4
11101111001	9.404176884111124	9.412561274491617	9.462168777081155	9.42630231189463	0.012795682828237995	9.97608349134666	9.997776247371208	10.0439710748429	10.005943604520256	0.014155153892604152	1	1	1	0	1	1	1	1	0	0	1	8
10100000011	8.594897929077966	8.692800986892816	8.51716293070644	8.601620615559074	0.03593066837761899		8.486289647039968		8.486289647039968	0.0	1	0	1	0	0	0	0	0	0	1	1	4
10101000000	7.946948089622897	8.324783289402697	8.021216172009428	8.09764918367834	0.08172246070567708		7.0	7.0	7.0	0.0	1	0	1	0	1	0	0	0	0	0	0	3
10011111001	9.280093460998314	9.302531383427098	9.346685711467478	9.30977018529763	0.013831920480224759	9.386106321022753	9.45557031493068	9.434332141862251	9.425336259271894	0.014531609454878861	1	0	0	1	1	1	1	1	0	0	1	7
10011101110	9.222403305715565	9.175526539964768	9.248587454441196	9.215505766707176	0.015111564772893795	9.519492243945963	9.383014295781065	9.351242809154066	9.41791644962703	0.03649335175586533	1	0	0	1	1	1	0	1	1	1	0	7
01100011001	9.02306333401674	9.187366253606797	8.824274678145441	9.01156808858966	0.07422710482400612	7.839000199430098	8.886889464701158		8.362944832065628	0.3024995746925828	0	1	1	0	0	0	1	1	0	0	1	5
10101000111	9.299125003464056	9.265018464051751	9.255600117518199	9.273247861678001	0.009348762512744375	8.712840440401104	9.289567266495618	9.135121120171997	9.04584294235624	0.12188204869178473	1	0	1	0	1	0	0	0	1	1	1	6
11111001110	9.488876646803933	9.46980613136648	9.673628398127546	9.544103725432654	0.04595904293916103	9.314617396263834	9.415426356613564	9.21261470066498	9.314219484514126	0.0413989949505058	1	1	1	1	1	0	0	1	1	1	0	8
00110101001	7.0	7.0	7.0	7.0	0.0	7.471495091766834			7.471495091766834	0.0	0	0	1	1	0	1	0	1	0	0	1	5
00100011000	8.962680061826212	9.221944804519557	8.729575547152658	8.97140013783281	0.10055172897086241	7.0	7.0	7.0	7.0	0.0	0	0	1	0	0	0	1	1	0	0	0	3
10111100101	9.168721606309276	9.277063429355223	9.150611090314882	9.198798708659794	0.02791660968117364	9.328028566283773	9.322912551784508	9.291940566358251	9.314293894808843	0.007971792674844675	1	0	1	1	1	1	0	0	1	0	1	7
10110011000	9.502213491868424	9.458256636721778	9.478201176933645	9.479557101841282	0.00898545285319721	7.745630088874563	8.564152461831455		8.154891275353009	0.23628705618219636	1	0	1	1	0	0	1	1	0	0	0	5
10110001101	8.969968243435812	9.049906702873256	8.78777039199713	8.935881779435398	0.054848695883881124			7.0	7.0	0.0	1	0	1	1	0	0	0	1	1	0	1	6
10000000011	8.456315136571103	8.85482192422531	8.407637929149285	8.572924996648565	0.10015968580513733	7.623578417852143			7.623578417852143	0.0	1	0	0	0	0	0	0	0	0	1	1	3
11100000010	9.387287859725195	9.475619506744179	9.373496976997107	9.412134781155492	0.02262108124039758	9.384239923717496	9.431876810547973	9.324802416908755	9.380306383724742	0.021900669685185066	1	1	1	0	0	0	0	0	0	1	0	4
10111001111	9.31593213612658	9.138253651655607	9.400001958633156	9.284729248805114	0.05455617775024887	8.35429146369024	9.23042042719566	8.917342514191187	8.834018135025696	0.1812492318584903	1	0	1	1	1	0	0	1	1	1	1	8
11011001001	9.41509028913393	9.440729832777173	9.510207055128966	9.455342392346688	0.02009122928965974	8.799745232351105	9.211611861958987	9.068797426878804	9.026718173729632	0.0853781078549347	1	1	0	1	1	0	0	1	0	0	1	6
11111101101	9.35463677536735	9.386160838440496	9.394065534663863	9.378287716157237	0.008516124957797768	9.972504848598694	9.938544492134854	9.845641239282386	9.918896860005312	0.026811427689244646	1	1	1	1	1	1	0	1	1	0	1	9
11101111000	9.387573753174337	9.401331598407797	9.4024734218547	9.397126257812277	0.003385353227246875	9.936793950728713	9.947092060904485	9.982946369379649	9.95561079367095	0.009890551406878414	1	1	1	0	1	1	1	1	0	0	0	7
10100001011	8.50767262970672	8.631360869905722	8.362802343978881	8.500611947863774	0.0548760882702488	7.50570396541166		7.0	7.25285198270583	0.14598416028034167	1	0	1	0	0	0	0	1	0	1	1	5
10100001010	8.40213024771817	8.049343005606062	8.327792357450349	8.259755203591526	0.07592375592019214			7.0	7.0	0.0	1	0	1	0	0	0	0	1	0	1	0	4
10100101001	8.18386376165422	8.318053442230173	7.985179994367366	8.162365732750587	0.06837129881277473	8.843381168315794	9.159388872971656	9.143844360860207	9.048871467382552	0.07272104833093951	1	0	1	0	0	1	0	1	0	0	1	5
01100001001	7.5167277950561155	7.644034827724456		7.580381311390285	0.03675037479039932						0	1	1	0	0	0	0	1	0	0	1	4
00111001000	7.0	7.0	7.0	7.0	0.0	7.0	7.0	7.0	7.0	0.0	0	0	1	1	1	0	0	1	0	0	0	4
10111000110	9.368752038192953	9.367478152553963	9.341039084601183	9.359089758449366	0.006387172247761122	8.620957186433424	9.159344908621227	9.244730447139425	9.008344180731358	0.13806652083953447	1	0	1	1	1	0	0	0	1	1	0	6
11011101111	9.453886179857863	9.457627094806078	9.511285412637069	9.474266229100335	0.013110514695319542	10.037418564338141	9.984146241141495	9.95531003019355	9.992291611891062	0.017005945741266064	1	1	0	1	1	1	0	1	1	1	1	9
10111001001	8.557284967571412	8.49480594791269	8.312787796393096	8.454959570625732	0.051858006478782526			7.0	7.0	0.0	1	0	1	1	1	0	0	1	0	0	1	6
10110110001	9.27646829722216	9.3351796974185	9.269529778297512	9.293725924312724	0.014724397213161794	9.21394343185868	9.38337883057083	9.283851115503774	9.293724459311095	0.03476157066992094	1	0	1	1	0	1	1	0	0	0	1	6
00110011001	9.170781976123696	9.436093175343263	9.371031444992003	9.32596886548632	0.05645128454636901	7.0		7.0	7.0	0.0	0	0	1	1	0	0	1	1	0	0	1	5
11111011111	9.541289269783787	9.547175869432511	9.638907540400268	9.575790893205522	0.022347432286080136	9.65254110609118	9.685242301181828	9.546921049353148	9.628234818875386	0.029513524796624422	1	1	1	1	1	0	1	1	1	1	1	10
11011000110	9.481997648360686	9.466232372645512	9.539570405551279	9.49593347551916	0.015760035038904368	9.624199006784892	9.58256788979066	9.586619563802383	9.597795486792645	0.00937161864852287	1	1	0	1	1	0	0	0	1	1	0	6
00111001010	7.0	7.0	7.0	7.0	0.0	7.0	7.0	7.0	7.0	0.0	0	0	1	1	1	0	0	1	0	1	0	5
00100001000	7.0	7.0	7.0	7.0	0.0	7.0	7.0	7.0	7.0	0.0	0	0	1	0	0	0	0	1	0	0	0	2
11010000010	9.446633277991667	9.470772673593027	9.503370292827439	9.473592081470711	0.0116242132974251	9.252369532283751	9.351700535664614	9.283398694347843	9.295822920765403	0.020746216963253575	1	1	0	1	0	0	0	0	0	1	0	4
11110000001	9.558402616438038	9.586951610761904	9.407607668589344	9.517653965263095	0.03934124601469272	9.14936440458651	9.23534241190898	9.283640085430893	9.222782300642129	0.027766307259075706	1	1	1	1	0	0	0	0	0	0	1	5
01111001000	7.413964829962836	7.702359555705279		7.558162192834057	0.08325238627013372			7.0	7.0	0.0	0	1	1	1	1	0	0	1	0	0	0	5
11110001011	9.476890573196313	9.514018474009731	9.490787963099876	9.493899003435308	0.007658102285371414	9.254969944076693	9.300014294184702	9.068119916384902	9.2077013848821	0.05019875186037801	1	1	1	1	0	0	0	1	0	1	1	7
11101000100	9.48631374136266	9.468976365872509	9.515093178122838	9.490127761786	0.00950964560218795	9.174998227197207	9.199567829634248	9.218756058147957	9.19777403832647	0.008954516624032833	1	1	1	0	1	0	0	0	1	0	0	5
11100011001	9.515486531424157	9.533500586276283	9.564375586392627	9.537787568031023	0.010093880847256062	9.83169418914721	9.7496762575541	9.653455504579004	9.744941983760105	0.0364213014146451	1	1	1	0	0	0	1	1	0	0	1	6
10110001010	8.493106319171673	8.739860170599579	8.714693250622574	8.649219913464608	0.05543304400742802			7.0	7.0	0.0	1	0	1	1	0	0	0	1	0	1	0	5
10101001000	7.824496728644896			7.824496728644896	0.0	7.0	7.0	7.0	7.0	0.0	1	0	1	0	1	0	0	1	0	0	0	4
11100000000	9.258623044495561	9.32568602334194	9.202812857928283	9.262373975255262	0.025116414970645474	8.807060282980801	9.295772247323317	9.237471735609404	9.113434755304509	0.10897149886189507	1	1	1	0	0	0	0	0	0	0	0	3
11101011010	9.507215908580779	9.495690067219565	9.464984074447203	9.48929668341585	0.00891196266185394	9.867543746281038	9.736512612241574	9.732711970375536	9.778922776299384	0.031341847584381376	1	1	1	0	1	0	1	1	0	1	0	7
00100000010	7.0	7.0	7.0	7.0	0.0	7.0	7.0	7.0	7.0	0.0	0	0	1	0	0	0	0	0	0	1	0	2
11100110010	9.296576696952943	9.378830788137636	9.371506811839165	9.348971432309915	0.01858456517763437	9.870005634696367	9.82842289704602	9.904950389123869	9.867792973622086	0.01564068499514194	1	1	1	0	0	1	1	0	0	1	0	6
11011010101	9.56260778451325	9.547021267461359	9.539201935507693	9.549610329160766	0.004864597829904181	9.409181247371878	9.538733074392821	9.52846939944061	9.492127907068436	0.029400813543147834	1	1	0	1	1	0	1	0	1	0	1	7
11010000011	9.490850737946252	9.496737834476123	9.528210886676444	9.505266486366272	0.00820059556356565	9.341778148311157	9.367226677236856	9.34052121536247	9.34984201363683	0.006151759456637593	1	1	0	1	0	0	0	0	0	1	1	5
11110001001	9.450147314733268	9.507180549471137	9.455417055403434	9.470914973202612	0.012866860263540086	8.871238408589969	9.286299841726324	9.043908338127775	9.067148862814689	0.08512156974008166	1	1	1	1	0	0	0	1	0	0	1	6
10110011001	9.473841932699637	9.515252369161669	9.517726767980172	9.50227368994716	0.010064825528499199	8.428202533119444	9.131786117843538	9.008216789415764	8.856068480126249	0.1533619336667593	1	0	1	1	0	0	1	1	0	0	1	6
11111001011	9.480052803554292	9.471945851839623	9.555337793574328	9.502445482989414	0.018773332397242888	9.248291586649069	9.345006463328351	8.984605601639792	9.19263455053907	0.07615277903429415	1	1	1	1	1	0	0	1	0	1	1	8
10111001110	9.303996870461514	9.091949011374176	9.277422959880187	9.224456280571959	0.047161381577137944	8.379563876909058	9.161027693136363	8.954649206115704	8.831746925387042	0.16532803350428601	1	0	1	1	1	0	0	1	1	1	0	7
11111000110	9.474816460516504	9.473236193983574	9.534104382423935	9.494052345641338	0.014164206933939084	9.671542024614187	9.661568458018877	9.589024654039472	9.64071171222418	0.018387187547763247	1	1	1	1	1	0	0	0	1	1	0	7
11110001101	9.449615083962556	9.4220489902985	9.502203799240753	9.457955957833937	0.016625161562352886	8.957231251121161	9.296116889751463	8.918815227569112	9.057387789480579	0.08476696998585526	1	1	1	1	0	0	0	1	1	0	1	7
11011001010	9.458963599210868	9.428183033446118	9.566010251824183	9.484385628160389	0.029534711776685953	9.117511550908032	9.303717046662037	9.082438385754736	9.167888994441602	0.04855319515055193	1	1	0	1	1	0	0	1	0	1	0	6
11111010101	9.561777837018557	9.538908452761873	9.605365635112882	9.568683974964438	0.013783506614213814	9.218844714037019	9.46721653878374	9.33331890489	9.339793385903585	0.05075033663320286	1	1	1	1	1	0	1	0	1	0	1	8
10101010110	9.415371285503909	9.388301837055263	9.472076248865127	9.425249790474766	0.01745339825490836	9.037442789627967	9.294986308092717	9.190433122070976	9.174287406597221	0.052879862379927464	1	0	1	0	1	0	1	0	1	1	0	6
00110000000	7.0	7.0	7.0	7.0	0.0	7.0	7.0	7.0	7.0	0.0	0	0	1	1	0	0	0	0	0	0	0	2
10101001110	9.108319260642904	9.0270932263724	9.031509052085974	9.05564051303376	0.01864654890515549	8.181200845461456	9.279212406459289	8.920809708141078	8.793740986687274	0.22858885653801844	1	0	1	0	1	0	0	1	1	1	0	6
10111001011	8.783175380437275	8.977436565073509	8.708428621450624	8.823013522320467	0.056688662291770574			7.0	7.0	0.0	1	0	1	1	1	0	0	1	0	1	1	7
10110001110	9.341926718903503	9.138117520857225	9.219445992292275	9.233163410684336	0.041884111899330466	8.095713888921047	8.993888739541367		8.544801314231208	0.25928074589249683	1	0	1	1	0	0	0	1	1	1	0	6
11100001000	9.321398621365033	9.322262584626873	9.201336558375235	9.281665921455714	0.028401266221232558	8.530833546978954	9.132946408511742	9.090595540980972	8.918125165490556	0.13720088515394407	1	1	1	0	0	0	0	1	0	0	0	4
10111010110	9.430939643985957	9.374178584229004	9.527595858298184	9.444238028837715	0.03166714984399881	9.014408973798178	9.190921102384412	9.109225610197132	9.104851895459907	0.03606355482561944	1	0	1	1	1	0	1	0	1	1	0	7
11101101001	9.310180514297276	9.38683901688824	9.42036808548329	9.372462538889602	0.023059118047250558	9.36783896005095	9.403021648960591	9.274990355641137	9.34861698821756	0.027003444743636463	1	1	1	0	1	1	0	1	0	0	1	7
11101001110	9.41205309504977	9.328672517754713	9.48404966551591	9.408258426106798	0.03174459047326346	9.424436608911446	9.454369193354015	9.233211271828763	9.370672358031408	0.04898239916517829	1	1	1	0	1	0	0	1	1	1	0	7
10101000001	8.468674693080892	8.734985054966264	8.475728467498596	8.559796071848586	0.06195539226967934						1	0	1	0	1	0	0	0	0	0	1	4
11101001001	9.347112807913494	9.352530842273486	9.269233549985351	9.32295906672411	0.019027007715860658	8.887846553894631	9.231594665282604	8.872579426887196	8.997340215354809	0.08288006573255424	1	1	1	0	1	0	0	1	0	0	1	6
10111010101	9.429949506178376	9.476375293300187	9.503215114073527	9.469846637850695	0.015132359540320089	8.117996998295906	9.035313991565673	8.773281951357907	8.642197647073163	0.19289675029996958	1	0	1	1	1	0	1	0	1	0	1	7
10111001010	8.411887355738658	8.756510064628548	8.582060161445192	8.583485860604133	0.07034762177242898			7.0	7.0	0.0	1	0	1	1	1	0	0	1	0	1	0	6
10110101001	8.546148328573576	8.65248506115661	8.114730817521654	8.437788069083947	0.11626217930059775	8.361647517502464	9.128788511121384	9.080865650934296	8.857100559852714	0.17544203126803135	1	0	1	1	0	1	0	1	0	0	1	6
11100011010	9.444168535147544	9.505428044103867	9.47000709096599	9.4732012234058	0.01255543521696727	9.66993569500603	9.789896335972768	9.688847132360666	9.716226387779821	0.026330769598096316	1	1	1	0	0	0	1	1	0	1	0	6
11111001001	9.484696276657745	9.447227901024236	9.408502249967515	9.446808809216499	0.015553746356185609	8.736422132637982	9.190576065460144	8.970186495672182	8.965728231256769	0.09271718266288582	1	1	1	1	1	0	0	1	0	0	1	7
11011001110	9.446204343823002	9.377860195437208	9.46982697705782	9.43129717210601	0.019498461720792594	9.268349093385867	9.409496669493274	9.107918275062486	9.261921345980541	0.06160136490559406	1	1	0	1	1	0	0	1	1	1	0	7
10101001001	8.399723437165433	7.88328402695741	8.22528075241187	8.16942940551157	0.10725122051903467			7.0	7.0	0.0	1	0	1	0	1	0	0	1	0	0	1	5
10110001001	8.519810454924196	8.600990647059957	8.545201796032599	8.555334299338917	0.01695364570546799			7.0	7.0	0.0	1	0	1	1	0	0	0	1	0	0	1	5
10100001101	8.781685415803224	8.924230710326906	8.735678306741633	8.813864810957254	0.04013443519141919			7.0	7.0	0.0	1	0	1	0	0	0	0	1	1	0	1	5
00100000000	7.0	7.0	7.0	7.0	0.0	7.0	7.0	7.0	7.0	0.0	0	0	1	0	0	0	0	0	0	0	0	1
10001000110	9.248666240283931	9.16053192021295	9.257651672303018	9.222283277599965	0.02190930967076429	8.346955268867925	9.28904515113423	9.227003189977948	8.954334536660035	0.2151141102003728	1	0	0	0	1	0	0	0	1	1	0	4
10100001000	7.660809747817679	7.681431772706334		7.671120760262006	0.005953065810350079	7.0	7.0	7.0	7.0	0.0	1	0	1	0	0	0	0	1	0	0	0	3
11100011011	9.483982555095915	9.479395631212236	9.500314084071421	9.487897423459858	0.004488690663503347	9.813905467369764	9.788536505148917	9.717161193846731	9.773201055455138	0.02047862962479699	1	1	1	0	0	0	1	1	0	1	1	7
00010000001	7.0	7.0		7.0	0.0	7.0	7.0	7.0	7.0	0.0	0	0	0	1	0	0	0	0	0	0	1	2
11100101001	9.345690396043056	9.347002247029897	9.355210253285355	9.34930096545277	0.0021063396477135217	9.43588883639458	9.318679071803944	9.317202385538453	9.357256764578992	0.027802269658820253	1	1	1	0	0	1	0	1	0	0	1	6
11110011000	9.468224152197015	9.513621693872373	9.530625352472189	9.504157066180527	0.013169800251298113	9.369190150062881	9.316224471207192	9.463277751982787	9.382897457750953	0.030405823345093154	1	1	1	1	0	0	1	1	0	0	0	6
10100011010	9.412277996947921	9.356319908131137	9.423078807686897	9.397225570921984	0.014629418503046684	8.698365535496361	9.229756110359997	9.192552825537938	9.040224823798098	0.12110384720631001	1	0	1	0	0	0	1	1	0	1	0	5
10100000000	8.046040361221253	8.162182597324453		8.104111479272852	0.03352737563923356	7.0	7.0	7.0	7.0	0.0	1	0	1	0	0	0	0	0	0	0	0	2
10110000000	8.229466170525253	8.329256460714719	8.207865344072964	8.255529325104312	0.02643676991061874	7.0	7.0	7.0	7.0	0.0	1	0	1	1	0	0	0	0	0	0	0	3
10100011000	9.409711711675598	9.37498991918033	9.44552706480717	9.410076231887698	0.014398911327679653	8.170315560807277	9.167748112400963	8.649826712210032	8.662630128472758	0.2036503823327577	1	0	1	0	0	0	1	1	0	0	0	4
11110000000	9.4965398230256	9.497744607415164	9.39831367354452	9.464199367995095	0.023295408797594407	8.580356697849867	9.185669722834081	9.348023083683676	9.038016501455877	0.16516609081078912	1	1	1	1	0	0	0	0	0	0	0	4
10100011001	9.429675375266724	9.414899306949119	9.442287118253633	9.428953933489824	0.005596329313204791	8.769131440048861	9.32619282557264	9.131099258625332	9.075474508082278	0.11539781299570548	1	0	1	0	0	0	1	1	0	0	1	5
10111001000	8.177665828704999	7.75291111549455	8.160866631752162	8.030481191983904	0.09819573461229897	7.0	7.0	7.0	7.0	0.0	1	0	1	1	1	0	0	1	0	0	0	5
11110011001	9.532023879467571	9.558345311402068	9.6128755571141	9.567748249327913	0.016835279800627514	9.768694157635363	9.619664297700787	9.556467205946252	9.648275220427466	0.04448596863106968	1	1	1	1	0	0	1	1	0	0	1	7
10010000001	8.624341471551265	8.956875446644359	8.608697165477333	8.729971361224317	0.0802862421416463						1	0	0	1	0	0	0	0	0	0	1	3
11011010001	9.460723300245245	9.544928380101831	9.56933302807436	9.524994902807146	0.023263081920258225	9.402017509685708	9.332803368940198	9.40998578166227	9.381602220096058	0.017329499152081707	1	1	0	1	1	0	1	0	0	0	1	6
11110010000	9.441572136372443	9.4879562373869	9.506372111056196	9.478633494938514	0.01363172968251509	8.866262137230306	9.023419028338736	9.25460319167452	9.048094785747855	0.0797484204592752	1	1	1	1	0	0	1	0	0	0	0	5
01001010011	8.857610068890605	9.0236395901643	8.879937770148148	8.920395809734352	0.03678561813390814	8.430990314402326	9.289492195180546	8.874137453661191	8.864873321081355	0.17527156925719495	0	1	0	0	1	0	1	0	0	1	1	5
01110110100	9.36029367645257	9.386406274632776	9.494663052327269	9.413787667804206	0.029086330730675014	9.281413113720891	9.445934987217619	9.509265831252096	9.412204644063536	0.048014784630288465	0	1	1	1	0	1	1	0	1	0	0	6
01010110101	9.404914393321985	9.564992037663425		9.484953215492705	0.04621043552588578	9.6877365410035			9.6877365410035	0.0	0	1	0	1	0	1	1	0	1	0	1	6
10001010000	9.222641992785613	9.367813264929367	9.134485637964717	9.241646965226565	0.048099440588136005	7.0	7.0	7.0	7.0	0.0	1	0	0	0	1	0	1	0	0	0	0	3
01001110111	9.31326569084368	9.538216115143	9.37355713464156	9.408346313542745	0.04753663249637937	10.058589252837312	9.804101434566984	10.027489807411632	9.963393498271977	0.056674898979460805	0	1	0	0	1	1	1	0	1	1	1	7
11111010000	9.58605967622323	9.620545541514996	9.339317803132797	9.515307673623676	0.0626187466775158	9.174463642318267	9.096068228188079	9.262760019707262	9.177763963404535	0.03404582066721021	1	1	1	1	1	0	1	0	0	0	0	6
11100110101	9.395009636757306	9.369228614004287	9.554049521565462	9.43942925744235	0.040864652603210705	10.096902757601454	10.082502547576699	10.25095601127057	10.143453772149574	0.03812127593660829	1	1	1	0	0	1	1	0	1	0	1	7
11111010011	9.463515254099724	9.648278634475954	9.625813130740989	9.579202339772221	0.041157828453534474	9.6665145663211	9.629925595445744	9.419531979694684	9.57199071382051	0.054417272695756976	1	1	1	1	1	0	1	0	0	1	1	8
10001010011	9.189755311496643	9.267483866709403	9.31856963133544	9.258602936513828	0.026480922188552046		8.615995178450007		8.615995178450007	0.0	1	0	0	0	1	0	1	0	0	1	1	5
10001010010	9.285631370859242	9.471057484078232	9.577242456124582	9.444643770354018	0.060252965994679136		8.657839024083891		8.657839024083891	0.0	1	0	0	0	1	0	1	0	0	1	0	4
01000010010	8.733708088377583			8.733708088377583	0.0						0	1	0	0	0	0	1	0	0	1	0	3
00000110110	9.074456454642855			9.074456454642855	0.0						0	0	0	0	0	1	1	0	1	1	0	4
00001010010	8.312817502362657	8.217076773079604		8.26494713772113	0.027637967911990805	7.0	7.0	7.0	7.0	0.0	0	0	0	0	1	0	1	0	0	1	0	3
00010010001	8.631662389131478	8.574003166453835	8.369668720740723	8.525111425442011	0.05620345826190557	7.0	7.0	7.0	7.0	0.0	0	0	0	1	0	0	1	0	0	0	1	3
11011110101	9.421626199550088	9.535544474247953	9.525505924336773	9.494225532711605	0.02574940291444463	9.939420882373641	10.13515848506117	9.506356407358496	9.860311924931102	0.13136570049010396	1	1	0	1	1	1	1	0	1	0	1	8
11001010010	9.449871935885051	9.389403462163008	9.639425166510666	9.492900188186242	0.05325455541281278	9.562838890728047	9.510683245768966	9.72024923199507	9.59792378949736	0.0445396606725765	1	1	0	0	1	0	1	0	0	1	0	5
01011010001	9.229594464009468	9.456890443187056	9.578657158056046	9.421714021750857	0.07232936997116807			9.960656471026493	9.960656471026493	0.0	0	1	0	1	1	0	1	0	0	0	1	5
10000010011	9.359782734567661			9.359782734567661	0.0						1	0	0	0	0	0	1	0	0	1	1	4
00111010011	8.289920422925038	8.721119706115221		8.50552006452013	0.12447651111211311	7.0	7.0	7.0	7.0	0.0	0	0	1	1	1	0	1	0	0	1	1	6
11110110101	9.54118916079542	9.515267873507655	9.43723063039242	9.497895888231833	0.022091413924891876	9.901848102510757	9.855209819725909	9.87174809215817	9.876268671464944	0.009653229884616267	1	1	1	1	0	1	1	0	1	0	1	8
01111010011	9.039115930424826	9.452022482908836	9.498220359886886	9.329786257740183	0.10319923315730298	8.431909499124046	8.813826995983472		8.62286824755376	0.11025008481000886	0	1	1	1	1	0	1	0	0	1	1	7
01001010010	8.557005612362731	8.757837712284278	8.730503567635731	8.68178229742758	0.04446666301426696		9.111209394910238		9.111209394910238	0.0	0	1	0	0	1	0	1	0	0	1	0	4
00010010011	8.2869919805191	8.760578587157276		8.523785283838187	0.13671267741357648	7.0	7.0		7.0	0.0	0	0	0	1	0	0	1	0	0	1	1	4
01101010011	8.168570774600026	8.88245329237219	8.279972729656157	8.443665598876125	0.15679263315511155	7.0	8.991003035382056	9.114063524836682	8.368355520072912	0.484438436577465	0	1	1	0	1	0	1	0	0	1	1	6
01000110110	9.450604793256774	9.354271168860958	9.30759875089246	9.37082490433673	0.02977191533651421	9.416411314968112	9.522510463315054		9.469460889141583	0.03062818592944857	0	1	0	0	0	1	1	0	1	1	0	5
11110010011	9.491667274408776	9.488425980067737	9.70121527429558	9.560436176257364	0.04977732470812959	9.480735246383524	9.714738672842577	9.550721855174576	9.582065258133559	0.049034354590142874	1	1	1	1	0	0	1	0	0	1	1	7
11010110110	9.630046126076094	9.597872273310859	9.376374023764397	9.53476414105045	0.05638315519854159	10.132636581223004	10.007974714769805	9.839742128787863	9.993451141593559	0.060006931127682454	1	1	0	1	0	1	1	0	1	1	0	7
10110010001	9.260666800619964	9.631111433583868	9.44760774587968	9.44646199336117	0.07561777908729062	7.0	7.0	7.0	7.0	0.0	1	0	1	1	0	0	1	0	0	0	1	5
11110010001	9.371082578022856		9.493649156258384	9.43236586714062	0.03538192346896667						1	1	1	1	0	0	1	0	0	0	1	6
11011010000	9.521791259444822	9.457905600253769	9.472450229574346	9.484049029757646	0.013670183410363855	9.24765322095626			9.24765322095626	0.0	1	1	0	1	1	0	1	0	0	0	0	5
10100110111	9.324391465069189	9.286277240080352	9.590926405725538	9.400531703625028	0.06776279765670574	9.759046206387774	9.617321124770916		9.688183665579345	0.040912507011207404	1	0	1	0	0	1	1	0	1	1	1	7
00010010000	8.038194967953519			8.038194967953519	0.0	7.0	7.0	7.0	7.0	0.0	0	0	0	1	0	0	1	0	0	0	0	2
11000010001	9.424392734193283	10.067104079438293	9.694340208904837	9.728612340845471	0.1317512824716074		9.855879963268707		9.855879963268707	0.0	1	1	0	0	0	0	1	0	0	0	1	4
10101010000	9.39683359625375		9.211386078547644	9.304109837400697	0.05353408713408394	7.0	7.0	7.0	7.0	0.0	1	0	1	0	1	0	1	0	0	0	0	4
10000110101	9.177066840120332	9.35677988696643	9.481658714148956	9.33850181374524	0.06250949048154833	9.422330748819693	9.69446877636754	9.609287721601211	9.575362415596148	0.05683011422954825	1	0	0	0	0	1	1	0	1	0	1	5
00111110100	9.048643657808023	9.03126397777716	8.710052869797947	8.929986835127709	0.07783928437144161	9.14864558008536	9.34837187260938		9.24850872634737	0.05765601437649476	0	0	1	1	1	1	1	0	1	0	0	6
00010110101	8.250680367862673	9.036127300000267		8.643403833931469	0.22673899885190285		9.15976007328402		9.15976007328402	0.0	0	0	0	1	0	1	1	0	1	0	1	5
11100010001	9.652884752044828	9.556380897368825	9.338753473365186	9.516006374259613	0.0656914398893913	9.499239017870897	9.705474775104324		9.60235689648761	0.05953513497762283	1	1	1	0	0	0	1	0	0	0	1	5
00100010000	8.466689687195696			8.466689687195696	0.0	7.0	7.0	7.0	7.0	0.0	0	0	1	0	0	0	1	0	0	0	0	2
00011010010	7.979012895619028	8.847348682375372		8.4131807889972	0.25066695011538054	7.0	7.0	7.0	7.0	0.0	0	0	0	1	1	0	1	0	0	1	0	4
10001110101	9.45541532723427	9.494555863550843	9.072802119591223	9.340924436792113	0.09513164399195098	9.704226047277766	9.558906081690392	9.592407844396847	9.618513324455002	0.03106604568329366	1	0	0	0	1	1	1	0	1	0	1	6
10000110100	9.096636079335843	9.159775459246447	9.053845148274632	9.103418895618974	0.0217555075141689	9.182128302504204	9.111591495714576	9.451199191839773	9.248306330019519	0.0731641935548956	1	0	0	0	0	1	1	0	1	0	0	4
01100110101	9.29648337368374	9.234747092658576	9.39802589005169	9.309752118798002	0.033657678958438235	9.630974967523347	9.364777446390343	10.034185681406193	9.676646031773295	0.13759313867283424	0	1	1	0	0	1	1	0	1	0	1	6
00000110100	8.933191447651902			8.933191447651902	0.0						0	0	0	0	0	1	1	0	1	0	0	3
11001010011	9.36211464559689	9.56710870480366	9.727716569325091	9.552313306575213	0.0748112842591211	9.59423493344049	9.798621778703856	9.452773779118466	9.61521016375427	0.070984364380875	1	1	0	0	1	0	1	0	0	1	1	6
01111010000	9.63139180412626			9.63139180412626	0.0						0	1	1	1	1	0	1	0	0	0	0	5
01010010001	9.397225659863128			9.397225659863128	0.0		7.0		7.0	0.0	0	1	0	1	0	0	1	0	0	0	1	4
01110010000	9.552664478451057			9.552664478451057	0.0						0	1	1	1	0	0	1	0	0	0	0	4
01100010010	8.591581223925031	8.550902164714453		8.571241694319742	0.011743032892804133						0	1	1	0	0	0	1	0	0	1	0	4
01101010010	8.950877359404947	8.284031335557955		8.617454347481452	0.1925018656880461						0	1	1	0	1	0	1	0	0	1	0	5
01100010011	8.607058350952432	8.74274526272518		8.674901806838806	0.03916943751875245						0	1	1	0	0	0	1	0	0	1	1	5
10100010000	9.335460624084238	9.285708100693137	9.077076325721775	9.232748350166384	0.05596749472083117	7.0	7.0	7.0	7.0	0.0	1	0	1	0	0	0	1	0	0	0	0	3
01110110101	9.356579633763909			9.356579633763909	0.0						0	1	1	1	0	1	1	0	1	0	1	7
01001110110	9.182983724004787	9.384092441162217		9.283538082583501	0.05805508599361125		9.498629771070801		9.498629771070801	0.0	0	1	0	0	1	1	1	0	1	1	0	6
11110110100	9.332190988500212			9.332190988500212	0.0						1	1	1	1	0	1	1	0	1	0	0	7
01011010000	9.508720325924063			9.508720325924063	0.0						0	1	0	1	1	0	1	0	0	0	0	4
10110010000	9.367822800426692			9.367822800426692	0.0						1	0	1	1	0	0	1	0	0	0	0	4
10011110110	9.307152444995863		9.284843373338663	9.295997909167262	0.006440074263327304		9.333507858591943		9.333507858591943	0.0	1	0	0	1	1	1	1	0	1	1	0	7
01000110111	9.533160531957444	9.516600316189024	9.673725811949481	9.574495553365317	0.03524566959354563	10.151943995905661	9.923962594753123	9.838509864555839	9.971472151738206	0.06614769733639476	0	1	0	0	0	1	1	0	1	1	1	6
10011110111	9.269644212663602	9.250641098371805	9.460091486496705	9.326792265844038	0.04728775609350545	9.932845192660304	9.256371433756		9.594608313208152	0.19528115340155908	1	0	0	1	1	1	1	0	1	1	1	8
10010010001	9.50921981800132	9.479006284597807	9.295538976795724	9.427921693131617	0.04720893645722424	7.0	7.0	7.0	7.0	0.0	1	0	0	1	0	0	1	0	0	0	1	4
10101110111	9.097963863389788	9.105982010519439		9.101972936954613	0.0023146397018528834						1	0	1	0	1	1	1	0	1	1	1	8
10011010001	9.431918669196914	9.366523405917713	9.392087062836085	9.396843045983571	0.013454241255786228						1	0	0	1	1	0	1	0	0	0	1	5
11000010011	9.630055690487682	9.38422742546731		9.507141557977496	0.07096450749196503						1	1	0	0	0	0	1	0	0	1	1	5
01111010010	9.136911605550187	9.382263312561166		9.259587459055677	0.07082693704446145	8.297596510315328	8.605286323946537		8.451441417130933	0.08882239836344201	0	1	1	1	1	0	1	0	0	1	0	6
10111010000	9.484555032027863	9.378691198797314	9.587831484364195	9.48369257172979	0.042691671006714615						1	0	1	1	1	0	1	0	0	0	0	5
11111010001	9.663010303872786		9.559636460290882	9.611323382081835	0.02984145820958935		8.962256848071592		8.962256848071592	0.0	1	1	1	1	1	0	1	0	0	0	1	7
11110110110	9.58147248297669	9.598959825499264	9.50871463638957	9.563048981621842	0.019538925213490304	10.197425589848091	10.175802162842269	10.076773565493394	10.150000439394585	0.026263169537315664	1	1	1	1	0	1	1	0	1	1	0	8
11101010010	9.551095191229244	9.410615871972329	9.352417650910905	9.43804290470416	0.041698067201592234	9.182617472430266	9.639897609243313	9.403734607783552	9.40874989648571	0.09335875759805491	1	1	1	0	1	0	1	0	0	1	0	6
11010110100	9.316245409416066		9.290349167667204	9.303297288541636	0.007475601072352603		9.931217603815764		9.931217603815764	0.0	1	1	0	1	0	1	1	0	1	0	0	6
11111010010	9.413647882804028			9.413647882804028	0.0						1	1	1	1	1	0	1	0	0	1	0	7
11101110100	9.3074498977262	9.480874677605556	9.518998565648637	9.435774380326798	0.04603212163970169	10.08922824733125	9.988241168318208	10.284831938156547	10.120767117935335	0.061559654614528954	1	1	1	0	1	1	1	0	1	0	0	7
11100110100	9.391428200728644			9.391428200728644	0.0						1	1	1	0	0	1	1	0	1	0	0	6
10111010011	9.45217501212233			9.45217501212233	0.0						1	0	1	1	1	0	1	0	0	1	1	7
10010110101	9.292591476490546			9.292591476490546	0.0						1	0	0	1	0	1	1	0	1	0	1	6
01100110100	9.29264304243506	9.42498627790364		9.358814660169351	0.03820420131160543						0	1	1	0	0	1	1	0	1	0	0	5
01011010010	9.326969855073925			9.326969855073925	0.0						0	1	0	1	1	0	1	0	0	1	0	5
00011110101	9.10992805597538	9.041591580113208	9.037400931776126	9.06297352262157	0.01662295869787103		9.327027417303713	8.996029705526146	9.16152856141493	0.09555080899796414	0	0	0	1	1	1	1	0	1	0	1	6
10110110100	9.336699382618173			9.336699382618173	0.0						1	0	1	1	0	1	1	0	1	0	0	6
10100110100	9.231611684076812	9.205714251412216	9.201099410716274	9.212808448735101	0.006714355679550401	9.526793753226539	9.103401640236443	9.414346582395304	9.348180658619428	0.0895345998645129	1	0	1	0	0	1	1	0	1	0	0	5
10011010011	9.550215450626			9.550215450626	0.0						1	0	0	1	1	0	1	0	0	1	1	6
10011010010	9.480144072983528			9.480144072983528	0.0						1	0	0	1	1	0	1	0	0	1	0	5
10101010010	9.023486808003462		9.311508830796397	9.16749781939993	0.08314479619602087						1	0	1	0	1	0	1	0	0	1	0	5
10100010001	9.393760233635902			9.393760233635902	0.0	7.0			7.0	0.0	1	0	1	0	0	0	1	0	0	0	1	4
10010010000	9.4399053848455			9.4399053848455	0.0		7.0		7.0	0.0	1	0	0	1	0	0	1	0	0	0	0	3
01011110111	9.379030476827747	9.488431996946382	9.562741274620695	9.476734582798274	0.03772717064606662						0	1	0	1	1	1	1	0	1	1	1	8
10010110100	9.366345126107218	9.249263899196944	9.23308690784726	9.282898644383806	0.02968700682760487	9.645212390535448	9.307767100367652		9.47648974545155	0.09741206455757427	1	0	0	1	0	1	1	0	1	0	0	5
00100110100	7.0			7.0	0.0						0	0	1	0	0	1	1	0	1	0	0	4
11100010000	9.509259889668671			9.509259889668671	0.0						1	1	1	0	0	0	1	0	0	0	0	4
00100110110	7.0			7.0	0.0						0	0	1	0	0	1	1	0	1	1	0	5
10101010011	9.051363973343188		9.454450135648603	9.252907054495896	0.11636095215682238						1	0	1	0	1	0	1	0	0	1	1	6
10100110101	9.326989665613617			9.326989665613617	0.0						1	0	1	0	0	1	1	0	1	0	1	6
11101010011	9.484355480760792	9.485353097969623	9.485216936137274	9.484975171622564	0.00022084971672654924	9.441577520329432	9.581223101013236	9.51574626610786	9.51284896248351	0.028523434305111346	1	1	1	0	1	0	1	0	0	1	1	7
11011010010	9.399814160046096		9.48957819746593	9.444696178756013	0.025912645583944165						1	1	0	1	1	0	1	0	0	1	0	6
00001110100	7.0			7.0	0.0						0	0	0	0	1	1	1	0	1	0	0	4
01000001001		7.60796443864216		7.60796443864216	0.0			7.0	7.0	0.0	0	1	0	0	0	0	0	1	0	0	1	3
00011000101		7.926803085574125		7.926803085574125	0.0	7.0		7.0	7.0	0.0	0	0	0	1	1	0	0	0	1	0	1	4
01100000001		7.906331746138197		7.906331746138197	0.0		8.57304030213153		8.57304030213153	0.0	0	1	1	0	0	0	0	0	0	0	1	3
01010001000		7.423729947363864	7.0	7.211864973681932	0.12232029958711631	7.0	7.0	7.0	7.0	0.0	0	1	0	1	0	0	0	1	0	0	0	3
01001001001		7.7288960465215935		7.7288960465215935	0.0						0	1	0	0	1	0	0	1	0	0	1	4
01011001000		7.593852699516143		7.593852699516143	0.0			7.0	7.0	0.0	0	1	0	1	1	0	0	1	0	0	0	4
00110000011		7.0		7.0	0.0	7.0	7.0	7.0	7.0	0.0	0	0	1	1	0	0	0	0	0	1	1	4
01101001001		7.459920773296955	7.0	7.229960386648477	0.13276769113444886			7.0	7.0	0.0	0	1	1	0	1	0	0	1	0	0	1	5
01110001000		7.615221082431248		7.615221082431248	0.0	7.0		7.0	7.0	0.0	0	1	1	1	0	0	0	1	0	0	0	4
10001001000		7.586080624511143	7.0	7.293040312255572	0.16918690316416626	7.0	7.0	7.0	7.0	0.0	1	0	0	0	1	0	0	1	0	0	0	3
00011010000		8.651299654966737		8.651299654966737	0.0	7.0	7.0	7.0	7.0	0.0	0	0	0	1	1	0	1	0	0	0	0	3
01100010001		9.624300691701944		9.624300691701944	0.0						0	1	1	0	0	0	1	0	0	0	1	4
00000001110			7.0	7.0	0.0	7.0	7.0	7.0	7.0	0.0	0	0	0	0	0	0	0	1	1	1	0	3
01100000000			7.0	7.0	0.0		7.0		7.0	0.0	0	1	1	0	0	0	0	0	0	0	0	2
00111101001			7.0	7.0	0.0	7.687315705295973			7.687315705295973	0.0	0	0	1	1	1	1	0	1	0	0	1	6
00001010001			7.0	7.0	0.0		7.0		7.0	0.0	0	0	0	0	1	0	1	0	0	0	1	3
00010000101						7.0	7.0	7.0	7.0	0.0	0	0	0	1	0	0	0	0	1	0	1	3
01000000000						7.0		7.0	7.0	0.0	0	1	0	0	0	0	0	0	0	0	0	1
00000010010						7.0	7.0	7.0	7.0	0.0	0	0	0	0	0	0	1	0	0	1	0	2
00010010010						7.0			7.0	0.0	0	0	0	1	0	0	1	0	0	1	0	3
00000010001						7.0			7.0	0.0	0	0	0	0	0	0	1	0	0	0	1	2
00100010011						7.0	7.0		7.0	0.0	0	0	1	0	0	0	1	0	0	1	1	4
00000010000						7.0	7.0	7.0	7.0	0.0	0	0	0	0	0	0	1	0	0	0	0	1
00110010011						7.0		7.0	7.0	0.0	0	0	1	1	0	0	1	0	0	1	1	5
00101010000						7.0	7.0	7.0	7.0	0.0	0	0	1	0	1	0	1	0	0	0	0	3
00101110100						9.62182405106799			9.62182405106799	0.0	0	0	1	0	1	1	1	0	1	0	0	5
00100010010						7.0	7.0	7.0	7.0	0.0	0	0	1	0	0	0	1	0	0	1	0	3
00001010000						7.0	7.0	7.0	7.0	0.0	0	0	0	0	1	0	1	0	0	0	0	2
00000010011						7.0	7.0	7.0	7.0	0.0	0	0	0	0	0	0	1	0	0	1	1	3
10010010010						7.0			7.0	0.0	1	0	0	1	0	0	1	0	0	1	0	4
10000010000						7.0			7.0	0.0	1	0	0	0	0	0	1	0	0	0	0	2
00101010001						7.0	7.0		7.0	0.0	0	0	1	0	1	0	1	0	0	0	1	4
00011010011						7.0			7.0	0.0	0	0	0	1	1	0	1	0	0	1	1	5
00100010001						7.0	7.0		7.0	0.0	0	0	1	0	0	0	1	0	0	0	1	3
10110010010						7.0			7.0	0.0	1	0	1	1	0	0	1	0	0	1	0	5
01000010000						7.0		7.0	7.0	0.0	0	1	0	0	0	0	1	0	0	0	0	2
11100110111						9.671649759475734			9.671649759475734	0.0	1	1	1	0	0	1	1	0	1	1	1	8
00110010001							7.0	7.0	7.0	0.0	0	0	1	1	0	0	1	0	0	0	1	4
00111010001							7.0	7.0	7.0	0.0	0	0	1	1	1	0	1	0	0	0	1	5
01001010000							7.0		7.0	0.0	0	1	0	0	1	0	1	0	0	0	0	3
00110010010							7.0		7.0	0.0	0	0	1	1	0	0	1	0	0	1	0	4
01100001000								7.0	7.0	0.0	0	1	1	0	0	0	0	1	0	0	0	3
01101010000								7.0	7.0	0.0	0	1	1	0	1	0	1	0	0	0	0	4
00101110101								7.0	7.0	0.0	0	0	1	0	1	1	1	0	1	0	1	6
00111010000								7.0	7.0	0.0	0	0	1	1	1	0	1	0	0	0	0	4
10001010001								7.0	7.0	0.0	1	0	0	0	1	0	1	0	0	0	1	4
