# Supplementary material for: Binding affinity landscapes constrain the evolution of broadly neutralizing anti-influenza antibodies
Source: eLife. 2021 Sep 7;10:e71393. doi: 10.7554/eLife.71393 (PMC8476123; doi:10.7554/eLife.71393)
Supplement: Figure 1—source data 3. — Inferred –logKD and standard deviation for each replicate of isogenic FACS, alongside inferred –logKD mean and SEM from Tite-Seq using the mean bin and maximum likelihood (ML, shown only for CR9114) inference methods. [file elife-71393-fig1-data3.xlsx]

## Sheet: CR-9114
antigen	variant	genotype	replicate	-logKD isogenic FACS	-logKD stdev isogenic FACS	-logKD mean Tite-Seq mean bin	-logKD SEM Tite-Seq mean bin	-logKD mean Tite-Seq ML	-logKD SEM Tite-Seq ML
FluB	germline	0000000000000000	1	6	0	6	0	6	0
FluB	germline	0000000000000000	2	6	0	6	0	6	0
FluB	somatic	111111111111111	1	6.93475	0.460497	7.17149	0.156883	6.23934	0.169238
FluB	somatic	111111111111111	2	6.77954	0.573083	7.17149	0.156883	6.23934	0.169238
H1	83	0000000001000000	1	9.47097	0.185162	9.32772	0.0374219	9.11739	0.0359864
H1	83	0000000001000000	2	9.46668	0.181239	9.32772	0.0374219	9.11739	0.0359864
H1	57	0001000000000000	1	8.4213	0.701764	8.44736	0.0371823	8.08948	0.0276238
H1	57	0001000000000000	2	8.49462	0.554205	8.44736	0.0371823	8.08948	0.0276238
H1	57,64,65	0001110000000000	1	9.5373	0.282942	9.32916	0.0594467	9.14537	0.0666135
H1	57,64,65	0001110000000000	2	9.55514	0.278623	9.32916	0.0594467	9.14537	0.0666135
H1	57,65	0001010000000000	1	9.11745	0.402911	8.80514	0.0738514	8.49744	0.104306
H1	57,65	0001010000000000	2	9.14137	0.362138	8.80514	0.0738514	8.49744	0.104306
H1	65	0000010000000000	1	8.35007	0.662617	8.36037	0.093473	8.12632	0.0763167
H1	65	0000010000000000	2	8.40028	0.578428	8.36037	0.093473	8.12632	0.0763167
H1	66,85,92	0000001000011000	1	8.07022	0.773839	8.05007	0.0407953	7.75873	0.0571049
H1	66,85,92	0000001000011000	2	8.16566	0.631633	8.05007	0.0407953	7.75873	0.0571049
H1	82	0000000001000000	1	9.33518	0.224876	9.12959	0.0593874	8.66817	0.109034
H1	82	0000000001000000	2	9.35068	0.213301	9.12959	0.0593874	8.66817	0.109034
H1	82,83	0000000011000000	1	9.43843	0.184343	9.37998	0.0357421	9.37565	0.0331201
H1	82,83	0000000011000000	2	9.39617	0.182905	9.37998	0.0357421	9.37565	0.0331201
H1	germline	0000000000000000	1	8.74635	0.409115	8.42462	0.0875466	8.16509	0.113791
H1	germline	0000000000000000	2	8.70453	0.460748	8.42462	0.0875466	8.16509	0.113791
H1	germline	0000000000000000	3	8.62838	0.329206	8.42462	0.0875466	8.16509	0.113791
H1	somatic	111111111111111	1	9.56529	0.224072	9.59229	0.0193373	9.69266	0.117898
H1	somatic	111111111111111	2	9.66745	0.215475	9.59229	0.0193373	9.69266	0.117898
H1	somatic	111111111111111	3	9.55517	0.228916	9.59229	0.0193373	9.69266	0.117898
H1	somatic	111111111111111	4	9.70464	0.196362	9.59229	0.0193373	9.69266	0.117898
H3	somatic	111111111111111	1	8.50518	0.313383	8.5024	0.0706345	7.80096	0.231781
H3	somatic	111111111111111	2	8.39209	0.29788	8.5024	0.0706345	7.80096	0.231781
H3	somatic	111111111111111	3	8.21478	0.349141	8.5024	0.0706345	7.80096	0.231781
H3	somatic - 83	111111110111111	1	7.11474	0.92431	6.61749	0.0177009	6	0
H3	somatic - 83	111111110111111	2	7.05294	0.800013	6.61749	0.0177009	6	0
H3	somatic -36	110111111111111	1	7.42386	0.506966	7.61638	0.0211747	6.7459	0
H3	somatic -36	110111111111111	2	7.54103	0.483281	7.61638	0.0211747	6.7459	0
H3	germline	0000000000000000	1	6	0	6	0	6	0
H3	germline	0000000000000000	2	6	0	6	0	6	0

## Sheet: CR-6261
antigen	variant	genotype	replicate	-logKD isogenic FACS	-logKD stdev isogenic FACS	-logKD mean Tite-Seq mean bin	-logKD SEM Tite-Seq mean bin
H1	germline	00000000000	1	7	0	7	0
H1	germline	00000000000	2	7	0	7	0
H1	29,35	11000000000	1	9.15252	0.321791	9.27859	0.043819
H1	29,35	11000000000	2	9.27719	0.384465	9.27859	0.043819
H1	29,35,82,83	11000110000	1	9.09268	0.285362	9.34345	0.0154925
H1	29,35,82,83	11000110000	2	9.22999	0.230932	9.34345	0.0154925
H1	somatic	11111111111	1	9.50414	0.233841	9.50665	0.0166883
H1	somatic	11111111111	2	9.50341	0.225267	9.50665	0.0166883
H9	29,35	11000000000	1	9.17641	0.683471	9.06784	0.144001
H9	29,35	11000000000	2	9.05469	0.680104	9.06784	0.144001
H9	29,35,82,83	11000110000	1	9.76701	0.289334	9.8071	0.00856222
H9	29,35,82,83	11000110000	2	9.86616	0.312003	9.8071	0.00856222
H9	29,35,82,83,84	11000111000	1	9.88542	0.290101	10.0017	0.0249471
H9	29,35,82,83,84	11000111000	2	9.95827	0.289318	10.0017	0.0249471
H9	82,83	00000110000	1	8.94476	0.982511	8.86985	0.0990956
H9	82,83	00000110000	2	8.97093	0.901182	8.86985	0.0990956
H9	somatic	11111111111	1	10.1907	0.254492	10.0947	0.0142035
H9	somatic	11111111111	2	10.1603	0.202185	10.0947	0.0142035
H9	germline	00000000000	1	7	0	7	0
H9	germline	00000000000	2	7	0	7	0
