# Supplementary material for: Binding affinity landscapes constrain the evolution of broadly neutralizing anti-influenza antibodies
Source: eLife. 2021 Sep 7;10:e71393. doi: 10.7554/eLife.71393 (PMC8476123; doi:10.7554/eLife.71393)
Supplement: Figure 2—source data 1. — Coefficients are reported with standard errors, p-values, and confidence intervals (95% with Bonferroni correction by the number of parameters). [file elife-71393-fig2-data1.csv]

Antigen	Num_Sequences	Num_Parameters	Term	Coefficient	StdError	pValue	CI_Lower	CI_Upper
H1	65094	6885	Intercept	8.535211937737962
H1	65094	6885	30	-0.872757750877897	0.03852734647015786	4.0349080740188443e-113	-1.0456015755209616	-0.6999139262348324
H1	65094	6885	35	0.031794733901686856	0.03800482036887326	0.4028223421271695	-0.138704901013912	0.2022943688172857
H1	65094	6885	36	0.20420455720379804	0.038007110970611935	7.782074543399e-08	0.03369464604543865	0.37471446836215744
H1	65094	6885	57	-0.11246010558964048	0.03799471555192303	0.0030787479028407524	-0.28291440763471976	0.05799419645543877
H1	65094	6885	64	0.09532796480446373	0.03814920810011976	0.01246352852019936	-0.07581943150626547	0.26647536111519293
H1	65094	6885	65	-0.21139719209095476	0.03819481711241634	3.1308560401257875e-08	-0.38274920244458566	-0.040045181737323854
H1	65094	6885	66	-0.20716599081957532	0.03824276920861804	6.080331129464929e-08	-0.37873312690769134	-0.03559885473145932
H1	65094	6885	79	-0.13722990998160234	0.038039694152620804	0.00030936657734145177	-0.30788599787709614	0.033426177913891436
H1	65094	6885	82	0.6150658053495166	0.03799676019246241	8.333392449619735e-59	0.4446023305084048	0.7855292801906284
H1	65094	6885	83	0.8854764392940606	0.03799473826305247	1.3882879262204727e-119	0.7150220353608725	1.0559308432272487
H1	65094	6885	84	-0.05459018860240139	0.038077080392158305	0.15167017343151779	-0.22541400101626263	0.11623362381145985
H1	65094	6885	85	-0.10900280142681934	0.03813669427191818	0.004261852473527482	-0.28009405740800464	0.06208845455436596
H1	65094	6885	92	0.015505239959027084	0.038013530393800135	0.683357846122987	-0.15503347042267643	0.1860439503407306
H1	65094	6885	95	0.009635024097938039	0.03807062686450291	0.8002050576467339	-0.16115983609095588	0.18042988428683196
H1	65094	6885	103	-0.009799156715763369	0.03803134365201991	0.7966702157483451	-0.1804177820659801	0.16081946863445337
H1	65094	6885	113	0.0023998850068975286	0.038000991902704485	0.9496447121533891	-0.1680825744010229	0.17288234441481795
H1	65094	6885	30,35	0.11655960506301843	0.037687530341899235	0.0019837838398813566	-0.052516583215118096	0.28563579334115496
H1	65094	6885	30,36	-0.15578752833925824	0.037675627597504806	3.5550064060681466e-05	-0.32481031777077357	0.013235261092257089
H1	65094	6885	30,57	0.7801165122582319	0.03759762938518962	2.7691021485117863e-95	0.611443643352448	0.9487893811640157
H1	65094	6885	30,64	-0.10648316239890043	0.037819776711344594	0.004871142294830486	-0.27615264272500606	0.06318631792720522
H1	65094	6885	30,65	-0.25355264801512734	0.037978248689595	2.4731077031855452e-11	-0.42393307537831404	-0.08317222065194066
H1	65094	6885	30,66	-0.4319463418359184	0.03793801627086152	5.308430918047786e-30	-0.6021462759711605	-0.26174640770067625
H1	65094	6885	30,79	0.09727614958511888	0.03773197963392839	0.009937467213287003	-0.07199944992532109	0.26655174909555884
H1	65094	6885	30,82	0.4781998889007344	0.0376054635937666	5.381990436547902e-37	0.30949187367168784	0.6469079041297809
H1	65094	6885	30,83	0.6966053166125508	0.037597816879047084	2.0455548448932605e-76	0.5279316065599351	0.8652790266651664
H1	65094	6885	30,84	0.24164641070496462	0.037775912397150474	1.598268820819045e-10	0.07217371724650709	0.4111191041634221
H1	65094	6885	30,85	0.27717475986371776	0.03777984371081028	2.21968297553042e-13	0.10768442949664628	0.44666509023078926
H1	65094	6885	30,92	0.1575697626694068	0.03770044291412544	2.92550841983126e-05	-0.011564354809000144	0.32670388014781376
H1	65094	6885	30,95	0.0606919831147007	0.037755375300271767	0.1079488916191991	-0.1086885755175411	0.2300725417469425
H1	65094	6885	30,103	0.022564129040625658	0.037688421919793595	0.5493740334129887	-0.14651605909079296	0.19164431717204428
H1	65094	6885	30,113	0.09645736839855301	0.037632906462899664	0.010376336518216974	-0.07237376277007201	0.26528849956717804
H1	65094	6885	35,36	0.014694691255887626	0.0373981537791677	0.6943758869712278	-0.15308327753798404	0.1824726600497593
H1	65094	6885	35,57	-0.12981953059129459	0.03738179558104853	0.0005154313429244016	-0.29752411219953756	0.03788505101694839
H1	65094	6885	35,64	-0.04390406716295292	0.037491513960563376	0.24158744324121187	-0.21210087432230346	0.12429273999639762
H1	65094	6885	35,65	-0.02136766023679615	0.037527163072108016	0.5690924539787556	-0.18972439870076627	0.14698907822717397
H1	65094	6885	35,66	-0.17125151302685304	0.037497172853371744	4.95645076729762e-06	-0.33947370746993466	-0.003029318583771423
H1	65094	6885	35,79	-0.048621612374070367	0.03742146037108345	0.1938469755776652	-0.21650414067839868	0.11926091593025795
H1	65094	6885	35,82	-0.03576665408010504	0.03738417120504804	0.3387062294220925	-0.20348189336336614	0.13194858520315605
H1	65094	6885	35,83	0.030444405447584977	0.03738198779344418	0.4154112870897573	-0.137261038476095	0.19814984937126495
H1	65094	6885	35,84	-0.007471793696261164	0.037462858128256143	0.8419150678570265	-0.1755400432437308	0.16059645585120846
H1	65094	6885	35,85	0.028790365405703677	0.03747593486741854	0.4423500568129638	-0.13933654983815486	0.1969172806495622
H1	65094	6885	35,92	-0.08022632817651432	0.03743403870442483	0.03210611455661421	-0.2481652861974348	0.08771262984440617
H1	65094	6885	35,95	0.07633358872962148	0.03747335784407771	0.04165359718994167	-0.09178176530872373	0.2444489427679667
H1	65094	6885	35,103	0.006310932183934526	0.03741257905941925	0.8660451873119899	-0.16153175221686733	0.17415361658473638
H1	65094	6885	35,113	-0.0918128395756832	0.037389141575715434	0.014067796576813769	-0.2595503772509893	0.0759246980996229
H1	65094	6885	36,57	-0.08246279177506743	0.03738428325220437	0.027400887525355553	-0.2501785337313859	0.08525295018125098
H1	65094	6885	36,64	0.011521353899002607	0.03755774336722728	0.7590243053962249	-0.15697257582394045	0.18001528362194566
H1	65094	6885	36,65	-0.035112804890256255	0.03751579097155546	0.34930418278574227	-0.2034185251156552	0.1331929153351427
H1	65094	6885	36,66	-0.021286029331657907	0.03750327033874854	0.570323771481692	-0.189535578700261	0.14696352003694518
H1	65094	6885	36,79	-0.004333896210147292	0.03745999150772601	0.9078954617291878	-0.17238928534283043	0.16372149292253585
H1	65094	6885	36,82	-0.06555633132444871	0.03738958812949064	0.07955043677421836	-0.23329587235761587	0.10218320970871844
H1	65094	6885	36,83	-0.24349845291048022	0.03738681887491027	7.428762290871453e-11	-0.41122557033815843	-0.07577133548280202
H1	65094	6885	36,84	0.0021201241531203507	0.03748592627199778	0.9548975896168781	-0.1660516151634879	0.1702918634697286
H1	65094	6885	36,85	-0.033638420572921	0.03749409567000856	0.36963415885078965	-0.2018468099608833	0.13456996881504132
H1	65094	6885	36,92	0.03958233545655254	0.03745479083826383	0.2906058892194228	-0.1284497221030298	0.20761439301613488
H1	65094	6885	36,95	0.057027109259210285	0.03746307086663863	0.1279589061227807	-0.11104209468867998	0.22509631320710055
H1	65094	6885	36,103	0.05233519543062526	0.0374185279860543	0.16192512674163478	-0.11553417742205116	0.22020456828330168
H1	65094	6885	36,113	0.018922925220094144	0.037392013520865366	0.6128103851266324	-0.14882749675764542	0.1866733471978337
H1	65094	6885	57,64	-0.0851077604924475	0.03747211497623234	0.02313674357435037	-0.25321753869825814	0.08300201771336313
H1	65094	6885	57,65	0.6487512595110357	0.037463126985407866	5.153082435544147e-67	0.4806818037995646	0.8168207152225069
H1	65094	6885	57,66	0.3018938422049523	0.03746464200751855	7.894791471414697e-16	0.133817589705225	0.4699700947046796
H1	65094	6885	57,79	0.08916753774088049	0.03740432978817636	0.017134243303513538	-0.07863813825620886	0.25697321373796983
H1	65094	6885	57,82	0.2395080189786657	0.03737352478325457	1.4808348813513227e-10	0.07184054234791357	0.4071754956094178
H1	65094	6885	57,83	0.10711067309862554	0.03737145296181069	0.004156995118353366	-0.060547508795396804	0.2747688549926479
H1	65094	6885	57,84	-0.022810325796930542	0.03743202837557269	0.5422750346088357	-0.19074026495308538	0.1451196133592243
H1	65094	6885	57,85	0.09284336654458447	0.03745373742894516	0.013182329379271614	-0.07518396514331879	0.26087069823248776
H1	65094	6885	57,92	-0.013885552413472835	0.037394305913215395	0.7103946051371226	-0.1816462586671271	0.15387515384018144
H1	65094	6885	57,95	-0.002902575821805642	0.037420005908166944	0.9381723726604364	-0.17077857902237462	0.16497342737876333
H1	65094	6885	57,103	-0.010693022611666825	0.037392297957213744	0.7749031988795854	-0.17844472064578776	0.1570586754224541
H1	65094	6885	57,113	-0.10303096512088694	0.037375857003272624	0.005842069548496345	-0.27070890470496345	0.06464697446318957
H1	65094	6885	64,65	-0.05310269461406214	0.03760096552453787	0.1578759865279663	-0.2217905303197251	0.11558514109160081
H1	65094	6885	64,66	-0.03171440053623209	0.03760664765849826	0.39905352426088037	-0.200427727791556	0.1369989267190918
H1	65094	6885	64,79	0.06372865879933173	0.03757647415687841	0.08989647613155438	-0.10484930217980992	0.2323066197784734
H1	65094	6885	64,82	-0.14130400018960687	0.03749236022336579	0.0001641470378688072	-0.3095046039068007	0.026896603527586938
H1	65094	6885	64,83	-0.0389167877323755	0.03747464777626227	0.2990495212413692	-0.207037928746278	0.129204353281527
H1	65094	6885	64,84	-0.046948872591005546	0.03771078635691914	0.21314706002205125	-0.2161293934783217	0.12223164829631059
H1	65094	6885	64,85	-0.018702543583122067	0.0377665453161741	0.6204505347528924	-0.18813321384896362	0.15072812668271948
H1	65094	6885	64,92	-0.05554782499472277	0.037584638910866476	0.13942936503663422	-0.22416241521090932	0.11306676522146378
H1	65094	6885	64,95	0.0012300653124830419	0.03763350748422417	0.9739255986245445	-0.16760376219611703	0.1700638928210831
H1	65094	6885	64,103	-0.08394092096800687	0.037539431277785335	0.025350742440131403	-0.25235269783417835	0.08447085589816461
H1	65094	6885	64,113	0.09601670752092928	0.03748545316318851	0.010426446077476434	-0.07215290930494037	0.2641863243467989
H1	65094	6885	65,66	-0.005805945817336955	0.037589402422861254	0.8772499595857857	-0.17444190640307514	0.16283001476840123
H1	65094	6885	65,79	0.12463057724714632	0.03753410563355439	0.000899237678529626	-0.043757307376192434	0.2930184618704851
H1	65094	6885	65,82	-0.24643973846521905	0.037471438010961367	4.8494502274154816e-11	-0.4145464796265066	-0.07833299730393148
H1	65094	6885	65,83	0.20119629460783306	0.037463337821045224	7.882538390884299e-08	0.03312589303215713	0.369266696183509
H1	65094	6885	65,84	0.02802884218201296	0.03757332347417358	0.4556842080833209	-0.14053498400460251	0.19659266836862843
H1	65094	6885	65,85	-0.032504987414079256	0.03758680696130679	0.3871533509117697	-0.20112930407562102	0.1361193292474625
H1	65094	6885	65,92	-0.013424996236413689	0.03753505465601462	0.7205949084475861	-0.18181713842448835	0.15496714595166097
H1	65094	6885	65,95	0.01936204663579799	0.037566889267249014	0.6062741525718216	-0.14917291400373786	0.18789700727533384
H1	65094	6885	65,103	-0.047187520149068796	0.03750811698666449	0.20837454061526992	-0.21545881285686444	0.12108377255872685
H1	65094	6885	65,113	-0.04801309689994593	0.03748625040171422	0.2002623975119558	-0.2161862903478402	0.12016009654794835
H1	65094	6885	66,79	0.12974748509160516	0.03752287249930993	0.0005449462341176282	-0.03859000473262525	0.2980849749158356
H1	65094	6885	66,82	0.04494661595672178	0.03747237577014449	0.23035401058137878	-0.12316433223927375	0.21305756415271732
H1	65094	6885	66,83	0.15286755445892797	0.03746483172410872	4.5038518522086364e-05	-0.015209549159395541	0.3209446580772515
H1	65094	6885	66,84	0.004784887560127737	0.037574441235282634	0.8986684099622154	-0.1637839531972492	0.17335372831750467
H1	65094	6885	66,85	-0.058685300005735797	0.03756288844013406	0.11821775745801005	-0.22720231188098755	0.10983171186951596
H1	65094	6885	66,92	0.025181816072132435	0.037514486131239214	0.5020602561883947	-0.14311805029590358	0.19348168244016845
H1	65094	6885	66,95	0.004121332281690315	0.037553162858020614	0.9126107133242833	-0.16435204807041282	0.17259471263379345
H1	65094	6885	66,103	-0.00490140761976976	0.03750460258358094	0.8960224481346212	-0.17315693378961378	0.16335411855007426
H1	65094	6885	66,113	-0.019823998729136705	0.037483204075666944	0.5968929019556088	-0.18798352555595887	0.14833552809768547
H1	65094	6885	79,82	0.06046298353289514	0.037417957692910876	0.1061253676773429	-0.1074038308345206	0.22832979790031088
H1	65094	6885	79,83	0.13076348698401974	0.03740449818298913	0.0004727651209147053	-0.037042944476556094	0.2985699184445956
H1	65094	6885	79,84	0.14002248673550155	0.03752892520254526	0.00019086058541309598	-0.028342157109767785	0.3083871305807709
H1	65094	6885	79,85	0.06202558335235908	0.03749670619000214	0.09810022726100845	-0.10619451751592401	0.23024568422064218
H1	65094	6885	79,92	0.01961767325508923	0.03746694853961311	0.6005591648322546	-0.14846892695517128	0.18770427346534974
H1	65094	6885	79,95	-0.03355075318805634	0.03750447582684019	0.3710153574053029	-0.2018057106937727	0.13470420431766003
H1	65094	6885	79,103	-0.008352870976370802	0.03746886137902282	0.8235920633877318	-0.1764480526880788	0.1597423107353372
H1	65094	6885	79,113	-0.037633047641244755	0.03741521359421576	0.3145053492714411	-0.20548755125909904	0.13022145597660953
H1	65094	6885	82,83	-0.5597142132078832	0.03737369544929935	1.3065932169237064e-50	-0.7273824554914669	-0.3920459709242995
H1	65094	6885	82,84	0.03008933097510469	0.037447263103426255	0.4216820568565701	-0.13790895518313726	0.19808761713334663
H1	65094	6885	82,85	0.017374028284509346	0.03746512049766792	0.6428366624274147	-0.15070437084806573	0.18545242741708443
H1	65094	6885	82,92	-0.00960065744150762	0.037402743045634665	0.7974242143685843	-0.1773992148935956	0.15819790001058037
H1	65094	6885	82,95	-0.025493073477087957	0.03743040647579726	0.4958240501637804	-0.19341573636363024	0.14242958940945433
H1	65094	6885	82,103	-0.012094643126290494	0.03739822156011134	0.7463923114333886	-0.17987291600332933	0.15568362975074834
H1	65094	6885	82,113	0.03908479723904845	0.037378520644197194	0.29572765099138054	-0.1286050921398377	0.2067746866179346
H1	65094	6885	83,84	-0.04882003760127174	0.037432233305782575	0.1921621892423199	-0.21675089612832818	0.1191108209257847
H1	65094	6885	83,85	0.10726149602256246	0.03745627879170261	0.0041894632305399535	-0.06077723688808381	0.2753002289332087
H1	65094	6885	83,92	-0.01861839466052928	0.03739680669204149	0.6185842171656428	-0.1863903200667204	0.14915353074566184
H1	65094	6885	83,95	-0.03065744258078862	0.03741987079304548	0.4126286504210579	-0.1985328396193324	0.13721795445775517
H1	65094	6885	83,103	0.01318610478265847	0.03739216519731541	0.7243569830484977	-0.15456499765558865	0.1809372072209056
H1	65094	6885	83,113	-0.032242092597421834	0.03737588318883604	0.3883366196726137	-0.1999201496568333	0.13543596446198963
H1	65094	6885	84,85	0.09908021095066699	0.037630406239094534	0.008466099917939836	-0.06973970355539141	0.26790012545672537
H1	65094	6885	84,92	0.07003281868151467	0.037547734156592995	0.06216293765865951	-0.09841620708602547	0.23848184444905482
H1	65094	6885	84,95	-0.026415774956640936	0.03753161491331492	0.48154314955276045	-0.19479248555291195	0.14196093563963008
H1	65094	6885	84,103	0.06413270333687004	0.03748688308691709	0.08712265979196883	-0.1040433285034981	0.23230873517723818
H1	65094	6885	84,113	0.04170661923958541	0.0374539554654363	0.26547955373474247	-0.12632169061744947	0.20973492909662028
H1	65094	6885	85,92	-0.06115820858996446	0.037516264945138746	0.10306918686329325	-0.22946605518570604	0.10714963800577712
H1	65094	6885	85,95	0.004726287409447305	0.037554987023735636	0.8998512592127721	-0.1637552766305517	0.1732078514494463
H1	65094	6885	85,103	-0.027630840493662934	0.037501174729353395	0.4612473590388053	-0.19587098840652092	0.14060930741919506
H1	65094	6885	85,113	-0.05703733441588266	0.03746833517547048	0.12794412120091853	-0.22513015543984907	0.11105548660808376
H1	65094	6885	92,95	-0.07214214781640593	0.03746490565911859	0.054160119983438525	-0.24021958312665873	0.09593528749384686
H1	65094	6885	92,103	0.006864003895487469	0.037434708086662424	0.8545167045299216	-0.16107795715047094	0.17480596494144587
H1	65094	6885	92,113	-0.0033296110699447823	0.03740911662581797	0.9290779740561823	-0.1711567620815816	0.16449753994169203
H1	65094	6885	95,103	-6.769956696039969e-05	0.03748323107974513	0.9985589241822133	-0.1682273475411904	0.1680919484072696
H1	65094	6885	95,113	-0.002295152285883173	0.03744005706943911	0.9511188679284905	-0.170261110277538	0.16567080570577167
H1	65094	6885	103,113	0.00010217479767571369	0.037400316860519596	0.997820252637986	-0.16768549814891162	0.16788984774426305
H1	65094	6885	30,35,36	0.036603712142111	0.03325456392952834	0.2710263829754223	-0.11258502113514934	0.18579244541937134
H1	65094	6885	30,35,57	-0.06625688412783892	0.03319034761745044	0.045909228026000476	-0.21515752611408306	0.08264375785840522
H1	65094	6885	30,35,64	0.1513502395566736	0.03331865177331796	5.570033203689535e-06	0.001873991330977709	0.3008264877823695
H1	65094	6885	30,35,65	0.09485524615421514	0.033373180460809025	0.004481055889911983	-0.054865632126810976	0.24457612443524127
H1	65094	6885	30,35,66	0.14960016111477525	0.03335360984517092	7.295849917136618e-06	-3.29182294585284e-05	0.299233240459009
H1	65094	6885	30,35,79	-0.07520575341027813	0.03327065126316397	0.023798673179298836	-0.22446665870374638	0.07405515188319012
H1	65094	6885	30,35,82	0.276013103535626	0.03319553688227182	9.389452932161151e-17	0.1270891811405038	0.4249370259307482
H1	65094	6885	30,35,83	-0.06012291340062559	0.033190554159226955	0.07007691443453061	-0.20902448198768375	0.08877865518643258
H1	65094	6885	30,35,84	-0.14530744532558826	0.033312120787233904	1.2910053882460222e-05	-0.29475439382740276	0.004139503176226217
H1	65094	6885	30,35,85	-0.029793796929027727	0.03330074122322183	0.37095721952603233	-0.1791896937092257	0.11960209985117023
H1	65094	6885	30,35,92	-0.10372476775347073	0.03328839281224465	0.0018344621605478734	-0.25306526630936554	0.045615730802424065
H1	65094	6885	30,35,95	0.002066279411706229	0.03331104498443817	0.9505392669974279	-0.14737584275539245	0.1515084015788049
H1	65094	6885	30,35,103	-0.033163620705121355	0.03325436229994763	0.31863699233168336	-0.182351449418972	0.11602420800872928
H1	65094	6885	30,35,113	-0.15052287468711256	0.033231948026639736	5.925105596644654e-06	-0.29961014706682443	-0.0014356023074006685
H1	65094	6885	30,36,57	-0.022794043700499866	0.03319106465104282	0.49224149856528177	-0.1716979024883112	0.12610981508731148
H1	65094	6885	30,36,64	0.08252740092442959	0.03333818126412912	0.013309216156230257	-0.06703646174125238	0.23209126359011156
H1	65094	6885	30,36,65	0.0017819685785624984	0.033361606566352724	0.9574024316697434	-0.14788698616328627	0.15145092332041127
H1	65094	6885	30,36,66	-0.030891460459415376	0.03335393937377233	0.35436081943190456	-0.18052601815575528	0.11874309723692453
H1	65094	6885	30,36,79	0.049922896709709064	0.03329044843679316	0.13371926516017849	-0.09942682391937649	0.19927261733879462
H1	65094	6885	30,36,82	0.24081861840745833	0.03319889881111933	4.102260731993414e-13	0.09187961351397014	0.38975762330094654
H1	65094	6885	30,36,83	0.2546766443002274	0.03319262317563729	1.7103863802206876e-14	0.10576579356055882	0.403587495039896
H1	65094	6885	30,36,84	0.010482038294999718	0.03332673026177394	0.7531246336220461	-0.13903045215784118	0.15999452874784062
H1	65094	6885	30,36,85	-0.028210282171001078	0.03329594497932764	0.3968543727652839	-0.17758466173772486	0.1211640973957227
H1	65094	6885	30,36,92	-0.03842497226269087	0.033284533111266175	0.24832486076297342	-0.18774815518332344	0.1108982106579417
H1	65094	6885	30,36,95	-0.01038021335631012	0.03329678521198032	0.7552329989138633	-0.15975836242803707	0.13899793571541683
H1	65094	6885	30,36,103	-0.11880951156037167	0.03326365301175851	0.0003548873205923088	-0.2680390208546457	0.030419997733902332
H1	65094	6885	30,36,113	-0.036273785496629074	0.0332261890959245	0.2749595149377057	-0.18533522179620898	0.11278765080295083
H1	65094	6885	30,57,64	0.1475547527085368	0.03324003499024165	9.051537497100405e-06	-0.001568799920057179	0.2966783053371308
H1	65094	6885	30,57,65	-0.10076211846667804	0.03326966991858444	0.0024575833999999548	-0.25001862118986934	0.04849438425651326
H1	65094	6885	30,57,66	0.23854067687155167	0.033255900398256696	7.430642563620668e-13	0.08934594784354052	0.3877354058995628
H1	65094	6885	30,57,79	-0.0643614697037529	0.033202402796726704	0.05257217506178906	-0.21331619439965058	0.08459325499214479
H1	65094	6885	30,57,82	-0.3052773045540915	0.03314686794673077	3.370998426401621e-20	-0.4539828852846317	-0.1565717238235513
H1	65094	6885	30,57,83	-0.5116303536838904	0.03314133421949052	1.1644451272755209e-53	-0.6603111086564076	-0.3629495987113732
H1	65094	6885	30,57,84	-0.09606548477050758	0.033233344137403725	0.0038460583310211344	-0.24515902047085228	0.05302805092983712
H1	65094	6885	30,57,85	-0.09970011166337345	0.03321543221738427	0.002686608521133597	-0.24871328977238336	0.04931306644563646
H1	65094	6885	30,57,92	-0.10281466638243542	0.033203205142239366	0.0019589414703130416	-0.25177299061164643	0.0461436578467756
H1	65094	6885	30,57,95	0.007478436775685826	0.03321579361995589	0.8218656976607557	-0.14153636268045638	0.15649323623182804
H1	65094	6885	30,57,103	0.047218846943425374	0.03318551337661068	0.15477767003473744	-0.10166010736503808	0.19609780125188883
H1	65094	6885	30,57,113	-0.1863336211640143	0.03316647380329036	1.9391256349908556e-08	-0.3351271589314033	-0.03754008339662526
H1	65094	6885	30,64,65	0.10321754810139816	0.03340898044372413	0.002005779962252498	-0.04666393833295604	0.25309903453575233
H1	65094	6885	30,64,66	0.08524645023604416	0.03340687597011384	0.010720453650496295	-0.06462559497536091	0.23511849544744923
H1	65094	6885	30,64,79	0.14426075432741114	0.03333902217810814	1.5134776673927936e-05	-0.005306880899883459	0.29382838955470575
H1	65094	6885	30,64,82	-0.022063933043110273	0.03325410484031472	0.5070161939347726	-0.17125060672523096	0.1271227406390104
H1	65094	6885	30,64,83	0.005266544053406208	0.03324162303702063	0.8741167780354571	-0.14386413297134112	0.15439722107815354
H1	65094	6885	30,64,84	-0.08952048854703454	0.03341501365060266	0.007385214173042559	-0.23942904153663558	0.0603880644425665
H1	65094	6885	30,64,85	0.051403589004113126	0.033401548559181614	0.12381992273024285	-0.09844455603857194	0.2012517340467982
H1	65094	6885	30,64,92	0.032053806083003566	0.033350390710701026	0.33649464280030605	-0.1175648313760553	0.18167244354206244
H1	65094	6885	30,64,95	-0.02823160301362737	0.033375152879450115	0.3976193450142528	-0.17796133008422657	0.12149812405697183
H1	65094	6885	30,64,103	-0.13956030962750654	0.033328117767525124	2.825025525971147e-05	-0.28907902479662617	0.009958405541613091
H1	65094	6885	30,64,113	0.08940676539939302	0.03328372986515565	0.007229025317627098	-0.059912813947607	0.23872634474639304
H1	65094	6885	30,65,66	0.46813298303922424	0.03342184648595009	1.6733642545612426e-44	0.3181937761504371	0.6180721899280114
H1	65094	6885	30,65,79	0.06350366913892325	0.03336752305760793	0.057024857341612625	-0.08619182854114238	0.21319916681898887
H1	65094	6885	30,65,82	-0.04407399171217574	0.03328186553037467	0.18542042892581304	-0.19338520716226917	0.10523722373791769
H1	65094	6885	30,65,83	0.02893473994021134	0.03326989668559873	0.38446942423266783	-0.12032278011953812	0.1781922599999608
H1	65094	6885	30,65,84	-0.18168847350116796	0.033422600335192926	5.4678803523313296e-08	-0.33163106235622775	-0.03174588464610814
H1	65094	6885	30,65,85	-0.004167238180949218	0.033387744065514174	0.9006717019794885	-0.15395345262884003	0.1456189762669416
H1	65094	6885	30,65,92	-0.06952864979730755	0.03338162614068222	0.03726999084396585	-0.21928741762289716	0.08023011802828206
H1	65094	6885	30,65,95	-0.1400505798603391	0.0334035346503092	2.7607606020245727e-05	-0.28990763503097305	0.00980647531029491
H1	65094	6885	30,65,103	-0.11139542828849303	0.033345860469129955	0.000836478754073053	-0.2609937418905661	0.03820288531358007
H1	65094	6885	30,65,113	0.05824557754434195	0.033321783701880166	0.08047397866226484	-0.0912447213378563	0.2077358764265402
H1	65094	6885	30,66,79	-0.060161724249459425	0.03336935928457967	0.07140859013100798	-0.20986545972739556	0.08954201122847671
H1	65094	6885	30,66,82	0.1494684349742601	0.03326721566313372	7.037333628926333e-06	0.00022294268748912494	0.2987139272610311
H1	65094	6885	30,66,83	0.14917360952356418	0.0332561179420381	7.28482467415956e-06	-2.2095463152960182e-05	0.2983693145102813
H1	65094	6885	30,66,84	-0.0801699718316562	0.033416247671253195	0.01643713703602483	-0.23008406096294537	0.06974411729963298
H1	65094	6885	30,66,85	-0.025399887128416065	0.033388899416472835	0.4468223342172427	-0.17519128478503512	0.12439151052820299
H1	65094	6885	30,66,92	-0.04052651747676661	0.033367838498765	0.22454716496397195	-0.1902234303089523	0.10917039535541909
H1	65094	6885	30,66,95	0.003654131244954728	0.033377740411551074	0.9128236769169742	-0.14608720417622378	0.15339546666613324
H1	65094	6885	30,66,103	0.0028643196341714416	0.03333818633169179	0.9315326290641167	-0.1466995657659315	0.15242820503427437
H1	65094	6885	30,66,113	-0.04512962547832888	0.03332045478437918	0.17561021275926095	-0.19461396248657137	0.1043547115299136
H1	65094	6885	30,79,82	-0.002317786147980616	0.03321453901478692	0.9443671937439655	-0.15132695711486288	0.14669138481890165
H1	65094	6885	30,79,83	-0.08452847310629397	0.03320303251564189	0.010905136810330557	-0.23348602288711764	0.06442907667452971
H1	65094	6885	30,79,84	-0.144527099888204	0.03334065396084727	1.4609672392564326e-05	-0.29410205572268955	0.005047855946281515
H1	65094	6885	30,79,85	-0.07479486700440896	0.033301048151631214	0.024706371647778808	-0.22419214074629856	0.07460240673748064
H1	65094	6885	30,79,92	0.01832558697726072	0.033291333431629655	0.5820052023969171	-0.1310281039717753	0.16767927792629675
H1	65094	6885	30,79,95	-0.002247033490759054	0.03331854483047504	0.9462309213475141	-0.1517228019426921	0.147228734961174
H1	65094	6885	30,79,103	-0.06457087036685105	0.03327420162358759	0.05231544975877899	-0.21384770351236992	0.08470596277866782
H1	65094	6885	30,79,113	-0.03375098297442758	0.03324290886257016	0.3099748397995008	-0.18288742855128576	0.1153854626024306
H1	65094	6885	30,82,83	-0.3220834228431628	0.0331475120516755	2.662137464188197e-22	-0.47079189319814696	-0.1733749524881787
H1	65094	6885	30,82,84	-0.06374880648673087	0.033244821518879135	0.05517222409679581	-0.2128938327435984	0.08539621977013667
H1	65094	6885	30,82,85	-0.12511318625053525	0.03322570452832546	0.00016634351710223774	-0.27417244865222734	0.02394607615115682
H1	65094	6885	30,82,92	-0.04063942505239371	0.03321161935898118	0.22108893529309587	-0.18963549767427323	0.10835664756948582
H1	65094	6885	30,82,95	-0.04459607702283874	0.033226849057820695	0.17954614528662416	-0.19366047408532366	0.10446832003964618
H1	65094	6885	30,82,103	0.026290295240532613	0.03319303436140451	0.4283391001199829	-0.12262240018679699	0.1752029906678622
H1	65094	6885	30,82,113	0.11899036773110605	0.033172698012932454	0.0003347822124589069	-0.029831093480238657	0.26781182894245076
H1	65094	6885	30,83,84	-0.15968166003351314	0.03323357114977262	1.5526819354409003e-06	-0.30877621417114137	-0.010587105895884907
H1	65094	6885	30,83,85	-0.243707712903072	0.033216586371261146	2.213884138006533e-13	-0.3927260688503859	-0.09468935695575809
H1	65094	6885	30,83,92	-0.10984505856479398	0.033204829129785056	0.0009398654168971092	-0.25881066842990486	0.039120551300316914
H1	65094	6885	30,83,95	-0.00863503991355108	0.03321606926372	0.7948911228387152	-0.1576510759802256	0.14038099615312344
H1	65094	6885	30,83,103	-0.0021321111350993682	0.03318577381197986	0.9487731814690794	-0.1510122338252295	0.14674801155503076
H1	65094	6885	30,83,113	0.0812561324700769	0.03316670958211305	0.01429130404341324	-0.06753846306321654	0.23005072800337034
H1	65094	6885	30,84,85	0.026825217873021723	0.033377426179158495	0.4215773358991255	-0.12291470781887262	0.17656514356491607
H1	65094	6885	30,84,92	-0.12101466249168369	0.033355142986827825	0.00028579629939465333	-0.2706546199132308	0.028625294929863432
H1	65094	6885	30,84,95	-0.0016043448050413467	0.03335725262362605	0.9616400332699921	-0.1512537666129587	0.148045077002876
H1	65094	6885	30,84,103	0.04432208160108653	0.033316965935343903	0.1834195009032686	-0.10514660351139599	0.19379076671356904
H1	65094	6885	30,84,113	-0.10387316858168893	0.03328122124467544	0.0018028060316127225	-0.25318149359642617	0.045435156433048296
H1	65094	6885	30,85,92	-0.08354348192428071	0.03331416090634743	0.012153067609932382	-0.2329995829378204	0.06591261908925897
H1	65094	6885	30,85,95	0.015333238313487652	0.03332965406061858	0.6454835370184286	-0.13419236907111978	0.16485884569809509
H1	65094	6885	30,85,103	0.013316308072966021	0.03329476726279171	0.6891933538104746	-0.1360527879471586	0.16268540409309065
H1	65094	6885	30,85,113	-0.09909400794481354	0.03326115816535485	0.0028905418709990007	-0.24831232470096037	0.050124308811333285
H1	65094	6885	30,92,95	-0.11315579633106876	0.03330939767261292	0.0006814632188636707	-0.2625905282234057	0.03627893556126818
H1	65094	6885	30,92,103	-0.03194822831428534	0.033272031206749264	0.3369521438090858	-0.1812153243981642	0.11731886776959352
H1	65094	6885	30,92,113	-0.04059679007532113	0.03325535127878058	0.22218199086186982	-0.18978905560872042	0.10859547545807816
H1	65094	6885	30,95,103	0.02124575482077562	0.03329859326450861	0.5234517087512018	-0.1281405056508472	0.17063201529239844
H1	65094	6885	30,95,113	-0.0844353067716429	0.033268315773704725	0.011151074943813146	-0.2336857344442124	0.06481512090092659
H1	65094	6885	30,103,113	-0.0056665065165201756	0.033221460260126824	0.8645643268934848	-0.15470672801310262	0.14337371498006227
H1	65094	6885	35,36,57	0.025351646589062193	0.033081618742331016	0.4434793092395919	-0.12306120902343476	0.17376450220155915
H1	65094	6885	35,36,64	0.1138568405658793	0.03318090906911555	0.0006009000862658888	-0.03500145760635354	0.26271513873811214
H1	65094	6885	35,36,65	0.04904393733266699	0.033167368420717186	0.1392311665851159	-0.09975361392414742	0.1978414885894814
H1	65094	6885	35,36,66	0.054952737607371294	0.033154258302564785	0.09742653251297523	-0.09378599820611278	0.20369147342085536
H1	65094	6885	35,36,79	-0.02858594044406182	0.033131670710821695	0.38825207356653946	-0.17722334237125356	0.12005146148312992
H1	65094	6885	35,36,82	-0.06440506793174983	0.03308738503997563	0.051597797128040294	-0.21284379267436446	0.0840336568108648
H1	65094	6885	35,36,83	-0.04986149571626286	0.033083226544776016	0.1317767815297402	-0.19828156435403474	0.09855857292150902
H1	65094	6885	35,36,84	0.08048749660047538	0.0331616319835397	0.015221935562151909	-0.06828431948814231	0.22925931268909308
H1	65094	6885	35,36,85	-0.06979639869998061	0.03315446071252737	0.03527915209497296	-0.21853604257787304	0.07894324517791182
H1	65094	6885	35,36,92	-0.04717078814886344	0.03314020511883679	0.1546341584404543	-0.19584647767843485	0.10150490138070797
H1	65094	6885	35,36,95	-0.08308331691492965	0.03314979955663873	0.012202937388514083	-0.23180204961972395	0.06563541578986465
H1	65094	6885	35,36,103	-0.06303435341664243	0.03311772339906589	0.057000863558922615	-0.21160918402947623	0.08554047719619137
H1	65094	6885	35,36,113	0.02973941622301468	0.03309421914542382	0.36885416595779574	-0.11872996811679268	0.17820880056282204
H1	65094	6885	35,57,64	0.11275200559592768	0.03312653814651516	0.0006653033145822884	-0.03586237029583089	0.26136638148768626
H1	65094	6885	35,57,65	0.1121595206787307	0.033128278355061255	0.0007106643832656646	-0.036462662246948996	0.2607817036044104
H1	65094	6885	35,57,66	0.08019643512410912	0.03311405286214643	0.015445827502508329	-0.06836192849325834	0.22875479874147658
H1	65094	6885	35,57,79	0.025871553414272164	0.0330915569523373	0.4343251022811746	-0.12258588762610842	0.17432899445465275
H1	65094	6885	35,57,82	0.1274890873918315	0.0330697140366559	0.00011577748363718232	-0.020870360575222457	0.2758485353588855
H1	65094	6885	35,57,83	0.06574852066448988	0.03306678336853495	0.046777061745349326	-0.0825977795534146	0.21409482088239437
H1	65094	6885	35,57,84	0.06653814843485262	0.03311335367583191	0.044498775576688514	-0.08201707844853726	0.2150933753182425
H1	65094	6885	35,57,85	0.017833733504467597	0.03311150230909141	0.5901674826009159	-0.1307131876600612	0.1663806546689964
H1	65094	6885	35,57,92	0.053724741896297945	0.033100915719965054	0.10458219078092151	-0.0947746850408269	0.20222416883342278
H1	65094	6885	35,57,95	-0.030676241906309576	0.03311022030939393	0.35419595630233136	-0.1792174116825076	0.11786492786988845
H1	65094	6885	35,57,103	-0.00042560939357483285	0.03308322470946718	0.9897356941018801	-0.14884566979766783	0.14799445101051817
H1	65094	6885	35,57,113	0.09839208747429096	0.03307161630328487	0.002929924130020203	-0.04997589456193116	0.24676006951051307
H1	65094	6885	35,64,65	-0.013102289880119189	0.033213462523699666	0.693222730929659	-0.16210663142442858	0.1359020516641902
H1	65094	6885	35,64,66	-0.018074961854533278	0.033207795190071075	0.5862379827984411	-0.1670538782473687	0.13090395453830214
H1	65094	6885	35,64,79	0.03646709783439139	0.033185114800889724	0.271816558153067	-0.11241006835840014	0.18534426402718293
H1	65094	6885	35,64,82	0.009783216555401264	0.033137074672037824	0.7678155970069884	-0.13887842896524796	0.1584448620760505
H1	65094	6885	35,64,83	0.00745161097177538	0.0331283078154584	0.8220330948949512	-0.141170704121006	0.15607392606455675
H1	65094	6885	35,64,84	-0.05692182960873193	0.033248221233664194	0.08689714613031392	-0.2060821078816344	0.09223844866417052
H1	65094	6885	35,64,85	0.026656057929409727	0.033248491818975816	0.42271687575255856	-0.12250543426047475	0.1758175501192942
H1	65094	6885	35,64,92	0.030991104350973186	0.03320313944563113	0.35062832669197375	-0.11796692514594834	0.1799491338478947
H1	65094	6885	35,64,95	-0.04601117337288496	0.033221737505932894	0.166066363609069	-0.19505263866718198	0.10303029192141205
H1	65094	6885	35,64,103	-0.004482736034739754	0.03317860573242215	0.8925259759333938	-0.15333070083185069	0.14436522876237118
H1	65094	6885	35,64,113	-0.054805775745842444	0.033145752542836804	0.09823899333826684	-0.203506352480709	0.09389480098902411
H1	65094	6885	35,65,66	-0.008857059015525914	0.03319921701683507	0.7896355122319758	-0.15779749146367258	0.14008337343262076
H1	65094	6885	35,65,79	0.026047283355299822	0.033173064039343315	0.43234316101041814	-0.12277581994693798	0.17487038665753762
H1	65094	6885	35,65,82	-0.1699115396590123	0.03313357759200552	2.9365240838733645e-07	-0.31855749635748076	-0.021265582960543816
H1	65094	6885	35,65,83	0.011957414923646381	0.033128487693706694	0.7181451913779984	-0.13666570715033804	0.1605805369976308
H1	65094	6885	35,65,84	-0.028305769246777412	0.033211058088289516	0.3940513727682111	-0.17729932386049144	0.12068778536693661
H1	65094	6885	35,65,85	0.048111286163386335	0.03320196066179359	0.147329132544987	-0.1008414549987399	0.19706402732551256
H1	65094	6885	35,65,92	0.002613654428939363	0.033195305635776426	0.9372431484538556	-0.14630923053349254	0.1515365393913713
H1	65094	6885	35,65,95	-0.11095542385494161	0.033212059238951305	0.0008358466214784682	-0.2599534698942346	0.03804262218435142
H1	65094	6885	35,65,103	-0.04589388664658081	0.0331621050092676	0.16638653823365718	-0.1946678248532122	0.10288005156005059
H1	65094	6885	35,65,113	-0.012898628473856588	0.03315054374793019	0.697209132838478	-0.16162069981680965	0.13582344286909648
H1	65094	6885	35,66,79	0.05479921186864489	0.03316827849122462	0.09850789191265526	-0.09400242220418492	0.2036008459414747
H1	65094	6885	35,66,82	0.012281667043157807	0.03311927757778889	0.7107644850272679	-0.13630013602480912	0.16086347011112473
H1	65094	6885	35,66,83	0.15151502850468335	0.033114290920892436	4.760224972026329e-06	0.0029555968930749243	0.3000744601162918
H1	65094	6885	35,66,84	-0.015049997247759794	0.03319908102514307	0.6503159062655108	-0.16398981960135497	0.13388982510583539
H1	65094	6885	35,66,85	0.02955124494082595	0.03319569918643602	0.37335517281657216	-0.11937340559352896	0.17847589547518086
H1	65094	6885	35,66,92	0.07537705046576382	0.03318113290870966	0.023109233244165337	-0.07348225190984914	0.22423635284137677
H1	65094	6885	35,66,95	0.0018631901914785143	0.03318812715643568	0.9552302618470867	-0.14702749022176814	0.15075387060472517
H1	65094	6885	35,66,103	0.005571162457627843	0.03315392233922885	0.8665529323536603	-0.14316606613583607	0.15430839105109176
H1	65094	6885	35,66,113	0.07887218593681344	0.03314237668864568	0.017325297921362046	-0.06981324582692766	0.22755761770055455
H1	65094	6885	35,79,82	0.07611224317797083	0.03310037183045547	0.021483619300377788	-0.07238474372754963	0.2246092300834913
H1	65094	6885	35,79,83	0.0311523431609792	0.03309220269159108	0.346513982380914	-0.11730799483578613	0.17961268115774454
H1	65094	6885	35,79,84	0.016933849565713643	0.033171893284188674	0.6097116375539411	-0.13188400142051515	0.16575170055194244
H1	65094	6885	35,79,85	0.03232339145127361	0.033154716177715794	0.3296010700818278	-0.11641739851074548	0.1810641814132927
H1	65094	6885	35,79,92	0.05448166827029066	0.03314590671775854	0.1002451991302577	-0.09421960013388558	0.2031829366744669
H1	65094	6885	35,79,95	0.002111284192775287	0.03316724824835424	0.9492446031073395	-0.14668572793916468	0.15090829632471525
H1	65094	6885	35,79,103	0.0008124038856194282	0.0331266603415556	0.9804345878427259	-0.1478025202052776	0.14942732797651645
H1	65094	6885	35,79,113	0.03385076309121793	0.03310649892714198	0.3065575936164965	-0.1146737115839592	0.18237523776639505
H1	65094	6885	35,82,83	-0.0293018701314256	0.033070343579780954	0.3755960014534582	-0.17766414239476472	0.11906040213191352
H1	65094	6885	35,82,84	0.010520846361205871	0.03312095237812726	0.7507521352309441	-0.13806847030223335	0.1591101630246451
H1	65094	6885	35,82,85	0.15490189157643897	0.03311826374846151	2.9142141485382916e-06	0.006324636813884538	0.3034791463389934
H1	65094	6885	35,82,92	0.027691542343017295	0.033107000503742885	0.4029189565603716	-0.12083518253691036	0.17621826722294495
H1	65094	6885	35,82,95	-0.03084309025384213	0.03311819033573154	0.3517003971132433	-0.17942001566755245	0.11773383515986818
H1	65094	6885	35,82,103	0.003568620525269184	0.033088240424446	0.9141137619363855	-0.1448739416973939	0.15201118274793227
H1	65094	6885	35,82,113	0.02775557634439363	0.03307546392140255	0.4013834847951011	-0.12062966712019449	0.17614081980898175
H1	65094	6885	35,83,84	0.062016621633287916	0.033113599585277854	0.061094874437842	-0.08653970846465076	0.2105729517312266
H1	65094	6885	35,83,85	-0.0610139190987794	0.03311282727310286	0.06539152972584897	-0.2095667844008685	0.08753894620330971
H1	65094	6885	35,83,92	0.07994503348247284	0.033102523733210244	0.015735088689143726	-0.06856160742563208	0.22845167439057776
H1	65094	6885	35,83,95	-0.0749575485284617	0.03311047829607951	0.02358627743890751	-0.22349987570088675	0.07358477864396334
H1	65094	6885	35,83,103	0.014342598814261809	0.03308349886795768	0.6646333686995496	-0.13407869153703486	0.16276388916555848
H1	65094	6885	35,83,113	0.10009401355299752	0.03307185550015077	0.002474603487897409	-0.04827504158337123	0.24846306868936627
H1	65094	6885	35,84,85	-0.03711466766934507	0.033217352064597555	0.2638588466205795	-0.1861364587186552	0.11190712337996506
H1	65094	6885	35,84,92	0.0038669588633859497	0.033193446085860195	0.9072585408303974	-0.14504758366830303	0.15278150139507493
H1	65094	6885	35,84,95	0.014559881699975241	0.03319715917587054	0.6609615893183034	-0.13437131873155453	0.163491082131505
H1	65094	6885	35,84,103	-0.030367841424295827	0.03316147768220925	0.35979837494322864	-0.17913896527650106	0.1184032824279094
H1	65094	6885	35,84,113	0.0166206814145049	0.03313571302276803	0.6159548982631042	-0.1320348553888519	0.1652762182178617
H1	65094	6885	35,85,92	0.02903877664856852	0.033176930546727344	0.3814305487706112	-0.11980167282425966	0.1778792261213967
H1	65094	6885	35,85,95	-0.05436495469214453	0.033186632677843615	0.10139410030619306	-0.20324893048077086	0.0945190210964818
H1	65094	6885	35,85,103	-0.013244297111875858	0.03315833892489503	0.6895809286910378	-0.16200133967199845	0.13551274544824674
H1	65094	6885	35,85,113	0.05195262011430524	0.033130635906256506	0.11685992258957416	-0.09668013940703216	0.20058537963564263
H1	65094	6885	35,92,95	0.06738286128832849	0.03316620708748813	0.04219138376185706	-0.0814094799217169	0.21617520249837388
H1	65094	6885	35,92,103	0.04189323941248824	0.033136899776302534	0.20614630468953912	-0.10676762147982372	0.1905541003048002
H1	65094	6885	35,92,113	0.06440430045253764	0.033124098434525226	0.05186003579153334	-0.08419913024859654	0.21300773115367183
H1	65094	6885	35,95,103	0.007173185850412711	0.03315898162898243	0.8287335558660018	-0.1415867400495388	0.15593311175036423
H1	65094	6885	35,95,113	-0.001853044097119505	0.033134414764717283	0.955401699905448	-0.15050275657289022	0.1467966683786512
H1	65094	6885	35,103,113	0.02164852249742566	0.03309732686507056	0.5130585106288242	-0.1268348038913125	0.1701318488861638
H1	65094	6885	36,57,64	0.03701171502876832	0.03315097824634229	0.2642302290533876	-0.11171230558851142	0.18573573564604806
H1	65094	6885	36,57,65	0.010442427212379646	0.0331288153187351	0.7526057877911424	-0.138182164673781	0.1590670190985403
H1	65094	6885	36,57,66	-0.010708261380148021	0.03312060474613964	0.746460759003664	-0.15929601847492203	0.137879495714626
H1	65094	6885	36,57,79	-0.01993892379064402	0.03310988998311201	0.5470403855235328	-0.16847861163613106	0.12860076405484303
H1	65094	6885	36,57,82	-0.06257105666466156	0.03308087352790006	0.058568298079813744	-0.21098056904892645	0.08583845571960333
H1	65094	6885	36,57,83	0.09305963337117756	0.033076778692659244	0.004903049105894984	-0.0553315085035882	0.24145077524594333
H1	65094	6885	36,57,84	-0.056150383788779346	0.03313056127240329	0.09011465816581632	-0.20478280848299213	0.09248204090543344
H1	65094	6885	36,57,85	0.02086782123741382	0.033121937647020934	0.528677294037013	-0.12772591560180926	0.1694615580766369
H1	65094	6885	36,57,92	-0.00224295103051686	0.03311020763336508	0.9459912633414046	-0.1507840639387105	0.14629816187767677
H1	65094	6885	36,57,95	-0.010480749275011969	0.033112083161344306	0.7516063988838194	-0.15903027629574787	0.13806877774572393
H1	65094	6885	36,57,103	-0.0006778748283093883	0.03309384966879739	0.9836578179299412	-0.1491456015986478	0.147789851942029
H1	65094	6885	36,57,113	0.0019401726461274471	0.03307574566239762	0.9532243395733002	-0.14644633478277713	0.15032668007503203
H1	65094	6885	36,64,65	-0.02254391087973784	0.033235485040278644	0.49757882837574685	-0.1716470512343085	0.12655922947483284
H1	65094	6885	36,64,66	0.006132997108468596	0.033231829713313676	0.8535811637814057	-0.14295374448649803	0.15521973870343522
H1	65094	6885	36,64,79	0.01733150999735117	0.03322939522974819	0.6019706015023671	-0.13174430986308033	0.16640732985778267
H1	65094	6885	36,64,82	-0.01164877921937335	0.03316727209185558	0.7254297819925029	-0.1604458983195409	0.1371483398807942
H1	65094	6885	36,64,83	-0.039683657785168025	0.03315556955738836	0.2313532707912416	-0.18842827623318453	0.10906096066284848
H1	65094	6885	36,64,84	-0.025770127905672235	0.03329076953726612	0.43887936271355854	-0.17512128907605964	0.12358103326471517
H1	65094	6885	36,64,85	-0.0128602790166219	0.033280945724226185	0.6991902574447602	-0.16216736797404974	0.13644680994080594
H1	65094	6885	36,64,92	0.043759880039810684	0.03323609719115779	0.18796546638983985	-0.10534600658484874	0.1928657666644701
H1	65094	6885	36,64,95	0.005291048851700175	0.03324747740655095	0.8735580530867655	-0.1438658924168429	0.15444799012024324
H1	65094	6885	36,64,103	-0.04592701899727292	0.033211868430036935	0.16671629134516996	-0.19492420901751564	0.10307017102296981
H1	65094	6885	36,64,113	-0.08923921347201147	0.03316686049316266	0.007134105423773113	-0.23803448603202454	0.0595560590880016
H1	65094	6885	36,65,66	-0.012279458117341102	0.033201381859387605	0.7114972410717351	-0.1612296026194134	0.1366706863847312
H1	65094	6885	36,65,79	0.006593763373681449	0.03318928457412798	0.8425204503325624	-0.14230210952020494	0.15548963626756784
H1	65094	6885	36,65,82	0.20036034816540016	0.033136761166208145	1.4895439575653344e-09	0.05170010911448253	0.3490205872163178
H1	65094	6885	36,65,83	0.02163817477998986	0.033130348450038205	0.5136799114601446	-0.12699329513703422	0.17026964469701394
H1	65094	6885	36,65,84	-0.021435043129605258	0.03322019231412598	0.5187733096365315	-0.17046957628644188	0.12759949002723137
H1	65094	6885	36,65,85	0.002620516439001852	0.03320233320283079	0.9370920154420763	-0.14633389604034722	0.15157492891835092
H1	65094	6885	36,65,92	-0.027376365010313597	0.03319446732851873	0.4095301234090062	-0.17629548910557138	0.12154275908494419
H1	65094	6885	36,65,95	-0.08263070446833254	0.03320083968844529	0.01281978341402512	-0.23157841664874593	0.06631700771208085
H1	65094	6885	36,65,103	0.01818480792235233	0.033168699969969524	0.5835209459618866	-0.13061871701514763	0.1669883328598523
H1	65094	6885	36,65,113	0.021076997892452987	0.0331455938690126	0.5248497123876334	-0.12762286698984235	0.16977686277474832
H1	65094	6885	36,66,79	0.01252439662840421	0.0331927033138085	0.7059343700498085	-0.1363868136322094	0.1614356068890178
H1	65094	6885	36,66,82	0.13244787669868446	0.033128199312530984	6.394778385865647e-05	-0.016173951621384075	0.281069705018753
H1	65094	6885	36,66,83	0.0345680752827473	0.033122147316490706	0.2966496417037876	-0.11402660218894561	0.18316275275444022
H1	65094	6885	36,66,84	-0.0366753433974103	0.03321962158917177	0.26958619540799733	-0.18570731613176933	0.11235662933694873
H1	65094	6885	36,66,85	-0.0052610391966081416	0.03319754865182825	0.8740816997387646	-0.15419398691987496	0.14367190852665868
H1	65094	6885	36,66,92	-0.04430827337597121	0.033185473821789636	0.18182569520225028	-0.19318705023108843	0.10457050347914601
H1	65094	6885	36,66,95	-0.057100559248253926	0.03318764569999056	0.08534026057378238	-0.20598907972106872	0.09178796122456086
H1	65094	6885	36,66,103	-0.001222755431804834	0.03316877220678509	0.9705930461153516	-0.1500266044426871	0.14758109357907742
H1	65094	6885	36,66,113	0.02406704501421586	0.033145112705110356	0.4677733853083169	-0.12463066124007202	0.17276475126850374
H1	65094	6885	36,79,82	0.02036569149024703	0.03312316070040727	0.5386578613190163	-0.12823353228862816	0.16896491526912222
H1	65094	6885	36,79,83	0.013326700567819927	0.03311283054484028	0.6873445367697582	-0.13522617941214504	0.1618795805477849
H1	65094	6885	36,79,84	-0.03760718401918339	0.03320632283829388	0.25741599999122783	-0.18657949505411836	0.11136512701575157
H1	65094	6885	36,79,85	0.028056714772760394	0.03317760063056709	0.3977502082429414	-0.12078674087267777	0.17690017041819855
H1	65094	6885	36,79,92	0.0033793467772597063	0.03316823556062343	0.9188482809588863	-0.1454220946975849	0.15218078825210432
H1	65094	6885	36,79,95	-0.03901756987799743	0.03318333856614466	0.239672383812392	-0.18788676741384971	0.10985162765785486
H1	65094	6885	36,79,103	0.017357849906601608	0.03315043778733436	0.6005528847361419	-0.1313637460692078	0.16607944588241103
H1	65094	6885	36,79,113	-0.03239154096663732	0.033122282541346144	0.3281090205412731	-0.18098682509265093	0.11620374315937629
H1	65094	6885	36,82,83	0.06114386685036788	0.03308381212836057	0.06458563037304436	-0.08727882886961119	0.20956656257034695
H1	65094	6885	36,82,84	-0.017626057910280712	0.03314214530705147	0.5948442933447335	-0.1663104516352426	0.13105833581468118
H1	65094	6885	36,82,85	0.01099269043279738	0.033132382635484625	0.7400559318382014	-0.1376479053759583	0.15963328624155307
H1	65094	6885	36,82,92	-0.027637900627742518	0.03312125540372404	0.4040331032666027	-0.176228576743828	0.12095277548834296
H1	65094	6885	36,82,95	-0.062159722703595544	0.03312366606642952	0.06057855328734336	-0.21076121368756354	0.08644176828037245
H1	65094	6885	36,82,103	0.006338824860316894	0.03310214084996316	0.8481401125954776	-0.14216609833268742	0.1548437480533212
H1	65094	6885	36,82,113	-0.08277532227164541	0.03308209301951714	0.012347975045461364	-0.23119030561652731	0.06563966107323649
H1	65094	6885	36,83,84	0.039662745660834164	0.03313225149766235	0.23127095681352283	-0.10897726182910816	0.1883027531507765
H1	65094	6885	36,83,85	0.04130572275466404	0.03312492818988629	0.21241427861657447	-0.10730143044758336	0.18991287595691145
H1	65094	6885	36,83,92	-0.010631232178994754	0.03311429557477411	0.7481762255173221	-0.15919068466914224	0.13792822031115273
H1	65094	6885	36,83,95	-0.009417929348019438	0.03311413848696121	0.7760986608306333	-0.1579766771008602	0.13914081840482131
H1	65094	6885	36,83,103	0.016602723177076673	0.033095918720863336	0.6159123321920088	-0.13187428590583264	0.16507973225998598
H1	65094	6885	36,83,113	0.00010932155246387576	0.033077356404379775	0.9973629861960016	-0.14828441208925358	0.14850305519418133
H1	65094	6885	36,84,85	0.03218214493177063	0.033246604989153036	0.3330569345260632	-0.11697088244252443	0.1813351723060657
H1	65094	6885	36,84,92	-0.08577799203014824	0.03321309025442731	0.00980671585225139	-0.23478066347644347	0.06322467941614698
H1	65094	6885	36,84,95	0.043321828267533835	0.033217299008623635	0.19217233332086717	-0.10569972475870199	0.19234338129376966
H1	65094	6885	36,84,103	-0.05097829965553169	0.03318670447228394	0.12451779231229243	-0.19986259753292848	0.0979059982218651
H1	65094	6885	36,84,113	-0.011151269331679536	0.033151089064087695	0.7365876800938737	-0.15987578710655534	0.13757324844319627
H1	65094	6885	36,85,92	-0.02054713840635855	0.03318688828143999	0.535830360489174	-0.169432260900046	0.1283379840873289
H1	65094	6885	36,85,95	-0.017106993301861717	0.03320072098276724	0.6063735178043399	-0.16605417293733546	0.13184018633361202
H1	65094	6885	36,85,103	-0.010884488486273547	0.0331747397021389	0.742840507092521	-0.15971510925319385	0.13794613228064675
H1	65094	6885	36,85,113	0.07074294916150403	0.03313775782756799	0.03278037070778059	-0.07792176117480157	0.21940765949780963
H1	65094	6885	36,92,95	0.011425328345863628	0.03317066053556027	0.7305160656976126	-0.13738699220530337	0.16023764889703063
H1	65094	6885	36,92,103	-0.05151624769406116	0.0331482035249811	0.12016150821785809	-0.2002278201804332	0.09719532479231088
H1	65094	6885	36,92,113	0.04008603357719026	0.03312742957489864	0.22626245068146442	-0.10853234149710522	0.18870440865148574
H1	65094	6885	36,95,103	-0.0002512158331959835	0.03316867260946359	0.9939569949076092	-0.14905461802425934	0.14855218635786738
H1	65094	6885	36,95,113	-0.020576877081614042	0.03313361997907182	0.5345842015154643	-0.16922302393962702	0.12806926977639893
H1	65094	6885	36,103,113	-0.0309496878174933	0.03310588559095064	0.3498593557838011	-0.17947141090495894	0.11757203526997234
H1	65094	6885	57,64,65	0.519967650967347	0.033167452792916524	2.8181988157078617e-55	0.3711697211946221	0.6687655807400719
H1	65094	6885	57,64,66	-0.035775626205446054	0.03316275638832493	0.2806861435232217	-0.18455248667010654	0.11300123425921443
H1	65094	6885	57,64,79	-0.08946058497545106	0.03315562014906079	0.006973506794354341	-0.23820543039103628	0.05928426044013416
H1	65094	6885	57,64,82	0.13562553624044882	0.033119386014558515	4.226472445878806e-05	-0.012956753303429658	0.2842078257843273
H1	65094	6885	57,64,83	0.07008633787314211	0.03311066893538867	0.0342870218974437	-0.07845684455743959	0.21862952030372382
H1	65094	6885	57,64,84	0.05678906887270485	0.033207450967499316	0.08724710574987837	-0.09218830324700297	0.20576644099241267
H1	65094	6885	57,64,85	0.04949862145322226	0.0332054606027379	0.13605169621050028	-0.09946982136588958	0.1984670642723341
H1	65094	6885	57,64,92	0.014165516090045571	0.03316143890742553	0.6692583153516238	-0.13460543380826637	0.1629364659883575
H1	65094	6885	57,64,95	-0.004616958384592806	0.033175325421993654	0.8893175261195052	-0.15345020684506433	0.14421629007587872
H1	65094	6885	57,64,103	0.0762643187695633	0.033145685297257296	0.021401804825752553	-0.0724359562839206	0.2249645938230472
H1	65094	6885	57,64,113	-0.08637859634639222	0.03311674029837158	0.00910147823108618	-0.2349490165105556	0.062191823817771164
H1	65094	6885	57,65,66	-0.1959002410131372	0.03314720474661676	3.4398982766080358e-09	-0.3446073327166814	-0.047193149309592924
H1	65094	6885	57,65,79	-0.09508199265571093	0.033134127616556104	0.004111275119547004	-0.24373041690919373	0.05356643159777186
H1	65094	6885	57,65,82	-0.18136497769028037	0.033111843420222976	4.335377989036207e-08	-0.32991342916919647	-0.03281652621136427
H1	65094	6885	57,65,83	-0.6044762340898049	0.033106467510553086	2.8544278685905376e-74	-0.753000567821889	-0.4559519003577209
H1	65094	6885	57,65,84	-0.01078390247739347	0.03316046806525444	0.7450281785234063	-0.15955049692199913	0.1379826919672122
H1	65094	6885	57,65,85	0.17502085392410394	0.03315035277568139	1.2992412297126543e-07	0.02629963933296242	0.32374206851524545
H1	65094	6885	57,65,92	0.04122178695797252	0.03314015854862649	0.21355533217705458	-0.10745369364536855	0.1898972675613136
H1	65094	6885	57,65,95	0.02761975012775697	0.0331485246212482	0.4047285671171228	-0.12109326288104832	0.17633276313656226
H1	65094	6885	57,65,103	0.09657045273121115	0.03312309582729806	0.00355252206464357	-0.05202848000980809	0.24516938547223038
H1	65094	6885	57,65,113	0.1000940657240803	0.03311238412321182	0.0025050786432415442	-0.04845681149086875	0.24864494293902936
H1	65094	6885	57,66,79	-0.11021952132639773	0.0331313629837296	0.0008792182709968211	-0.25885554270879685	0.03841650005600139
H1	65094	6885	57,66,82	-0.15145383328699635	0.0330966516767775	4.746840977483371e-06	-0.2999341306032024	-0.002973535970790281
H1	65094	6885	57,66,83	-0.29005099892507014	0.03309165173925904	1.915561450825528e-18	-0.43850886520454924	-0.14159313264559106
H1	65094	6885	57,66,84	-0.025646002619317487	0.03315287065106879	0.4391893937746977	-0.1743785130626732	0.12308650782403824
H1	65094	6885	57,66,85	-0.02745819804045868	0.03314372305646331	0.40741430297098813	-0.17614966996487255	0.12123327388395519
H1	65094	6885	57,66,92	-0.04607013671128499	0.03312858735185126	0.16433812359965397	-0.1946937058779566	0.10255343245538662
H1	65094	6885	57,66,95	0.0038500673654670026	0.03313342265802383	0.9074953070098951	-0.1447951942583489	0.15249532898928292
H1	65094	6885	57,66,103	-0.00014989933362175023	0.03311627618432645	0.9963884392921867	-0.1487182373599277	0.1484184386926842
H1	65094	6885	57,66,113	0.001619742152650705	0.03310516594389192	0.9609775024275368	-0.14689875240854938	0.1501382367138508
H1	65094	6885	57,79,82	-0.05705688929655395	0.03309011639056214	0.08466118097609773	-0.2055078675973569	0.091394089004249
H1	65094	6885	57,79,83	-0.05128625068360604	0.033082098470029075	0.12108168359982434	-0.19970125848092019	0.09712875711370811
H1	65094	6885	57,79,84	-0.07226214034719136	0.03314209655204144	0.02923379737661216	-0.22094631534433587	0.07642203464995315
H1	65094	6885	57,79,85	-0.07473687979826071	0.03312233980802176	0.02404998018911479	-0.22333242083766558	0.07385866124114415
H1	65094	6885	57,79,92	-0.001073264528468676	0.03311305468402682	0.9741435028823656	-0.14962715005586433	0.14748062099892698
H1	65094	6885	57,79,95	0.02714179845304132	0.03312597136067896	0.4125895256118636	-0.12147003468816064	0.1757536315942433
H1	65094	6885	57,79,103	0.06169910469691409	0.033102336940510575	0.06234222706208501	-0.08680669820993758	0.21020490760376576
H1	65094	6885	57,79,113	0.03809607947508886	0.03308607421674197	0.24956282854880377	-0.1103367645692194	0.18652892351939712
H1	65094	6885	57,82,83	-0.27656504593137443	0.03307641740532657	6.333168669794784e-17	-0.42495456697600015	-0.12817552488674872
H1	65094	6885	57,82,84	0.010133198056212323	0.033102853575602484	0.7595200674707441	-0.13837492261174703	0.15864131872417167
H1	65094	6885	57,82,85	-0.0046783036633586406	0.033100478570675794	0.8876046560401094	-0.15317576943362363	0.14381916210690635
H1	65094	6885	57,82,92	0.0006796637605444023	0.03308763742398526	0.9836116205426989	-0.14776019324321718	0.14911952076430599
H1	65094	6885	57,82,95	0.03770255876601153	0.033091094656335245	0.25455911757496447	-0.11075280829273176	0.18615792582475482
H1	65094	6885	57,82,103	0.0005498627326457894	0.033077055505651876	0.9867368818761607	-0.14784252099811945	0.14894224646341103
H1	65094	6885	57,82,113	0.04650605362494664	0.03306429621930708	0.1595709831946834	-0.10182908858638878	0.19484119583628207
H1	65094	6885	57,83,84	0.08713825667400998	0.033095647912190836	0.008467616555177594	-0.061337537489861566	0.23561405083788153
H1	65094	6885	57,83,85	-0.08851092276809758	0.0330951548917383	0.007487563806099914	-0.23698450511235394	0.05996265957615879
H1	65094	6885	57,83,92	0.02895015932507161	0.03308322337616249	0.381539050905657	-0.11946989509746536	0.17737021374760858
H1	65094	6885	57,83,95	-0.009864793108681491	0.03308365027532018	0.7655689198136248	-0.15828676271328815	0.13855717649592517
H1	65094	6885	57,83,103	0.00038524905252890207	0.03307233115667282	0.9907059469782016	-0.14798594000428905	0.14875643810934686
H1	65094	6885	57,83,113	0.10543017674562583	0.0330608036844524	0.0014285229860400382	-0.0428892970343929	0.2537496505256446
H1	65094	6885	57,84,85	-0.0573356185200814	0.03317538858097076	0.08394734866903875	-0.20616915032836075	0.09149791328819795
H1	65094	6885	57,84,92	-0.009238049715911023	0.03314942418602021	0.7804921389890229	-0.15795509840923533	0.13947899897741328
H1	65094	6885	57,84,95	-0.01040212048659006	0.03314966360121524	0.7536796584851057	-0.15912024325954294	0.13831600228636282
H1	65094	6885	57,84,103	-0.0648440294120547	0.03312753116847743	0.05030452135912425	-0.21346286026190506	0.08377480143779567
H1	65094	6885	57,84,113	-0.02611380077968306	0.03310536182851875	0.43022697736368243	-0.1746331741309165	0.12240557257155038
H1	65094	6885	57,85,92	0.023360908956108428	0.03313009205929801	0.48073427978068906	-0.12526941072452	0.17199122863673685
H1	65094	6885	57,85,95	-0.012214354850670933	0.0331395542532996	0.7124471409534763	-0.1608871244259999	0.13645841472465803
H1	65094	6885	57,85,103	-0.0031491550653398037	0.033121277907985594	0.9242519956916714	-0.15173993214147038	0.14544162201079078
H1	65094	6885	57,85,113	-0.020451833961986576	0.033100654103009546	0.5366647913671381	-0.16895008721653723	0.12804641929256408
H1	65094	6885	57,92,95	0.053438553387256726	0.0331162780724747	0.10660569722773877	-0.09512979310977962	0.20200689988429307
H1	65094	6885	57,92,103	-0.018639474427975977	0.03310005823550431	0.5733518530057131	-0.1671350544639424	0.12985610560799044
H1	65094	6885	57,92,113	0.038232876821198136	0.03309002032976318	0.2479231500962619	-0.11021767052555759	0.18668342416795386
H1	65094	6885	57,95,103	-0.03760636487027402	0.03311719859833839	0.2561479766999854	-0.186178841088808	0.11096611134825995
H1	65094	6885	57,95,113	0.022819105125723882	0.033096399563475924	0.4905278134666232	-0.12566006114380288	0.17129827139525064
H1	65094	6885	57,103,113	-0.0025661179274995005	0.03307546606252268	0.9381594540472995	-0.1509513709977165	0.1458191351427175
H1	65094	6885	64,65,66	-0.058934296891791194	0.03324344832336229	0.07626552802119928	-0.20807316263186068	0.0902045688482783
H1	65094	6885	64,65,79	-0.08283318014710961	0.033234972918811834	0.012692855540855417	-0.23193402298988372	0.0662676626956645
H1	65094	6885	64,65,82	-0.003135015240732786	0.03318112292289137	0.9247266921601087	-0.15199427281733457	0.145724242335869
H1	65094	6885	64,65,83	0.07185818825624257	0.03316915696744633	0.030283466416539104	-0.07694738689231473	0.22066376340479987
H1	65094	6885	64,65,84	0.06113029314820606	0.033295596228337214	0.06636462673069593	-0.08824252182971115	0.21050310812612327
H1	65094	6885	64,65,85	-0.06166818842422339	0.033292162044697184	0.06398300124447523	-0.21102559674974297	0.08768921990129619
H1	65094	6885	64,65,92	-0.00321817563734772	0.033246356816023434	0.9228872699524913	-0.1523700896416128	0.14593373836691736
H1	65094	6885	64,65,95	-0.03273001938658482	0.03326658710587184	0.3251831952728017	-0.18197269179991254	0.11651265302674291
H1	65094	6885	64,65,103	0.01590341209954471	0.03322053194795599	0.63213794095381	-0.13313264474411532	0.16493946894320474
H1	65094	6885	64,65,113	-0.12860970197108945	0.033191649468679814	0.00010684633339845872	-0.2775161844048655	0.02029678046268657
H1	65094	6885	64,66,79	-0.12041012847602911	0.03323677461366016	0.00029168092055292734	-0.2695190541964721	0.028698797244413876
H1	65094	6885	64,66,82	-0.055546133456257696	0.033176088734564034	0.09408053169793267	-0.20438280633798192	0.09329053942546653
H1	65094	6885	64,66,83	0.04518843198378519	0.03316446797329825	0.1730278776842564	-0.10359610710190931	0.1939729710694797
H1	65094	6885	64,66,84	0.010012588946423095	0.03330444155048398	0.7636914362573614	-0.13939990847656547	0.15942508636941166
H1	65094	6885	64,66,85	0.0046605761318883054	0.03329448912900767	0.8886759554115771	-0.14470727210681872	0.15402842437059533
H1	65094	6885	64,66,92	0.0217050749742298	0.033244143015967904	0.5138238318478097	-0.12743690733985547	0.17084705728831506
H1	65094	6885	64,66,95	-0.03375504319757727	0.033253467251659376	0.31007028453987784	-0.18293885648904468	0.11542877009389013
H1	65094	6885	64,66,103	0.013654684379826199	0.033225403147285344	0.681095152945908	-0.13540322594713397	0.16271259470678637
H1	65094	6885	64,66,113	-0.06562391932583067	0.03319005239629609	0.04802187360430952	-0.21452323687221303	0.08327539822055169
H1	65094	6885	64,79,82	-0.03799510852648513	0.03317684957912674	0.2521187890414387	-0.18683519475732957	0.1108449777043593
H1	65094	6885	64,79,83	-0.0726109061274518	0.03315876735693282	0.028543055359294276	-0.221369870746548	0.07614805849164438
H1	65094	6885	64,79,84	0.024577788233019704	0.03329934790784078	0.4604650616629081	-0.12481185776736967	0.17396743423340907
H1	65094	6885	64,79,85	0.003188983953804403	0.03327224561202168	0.9236438739342123	-0.1460790740086024	0.1524570419162112
H1	65094	6885	64,79,92	0.014146311238826703	0.033233450559076345	0.6703536633415339	-0.1349477018971736	0.163240324374827
H1	65094	6885	64,79,95	0.06043461881605894	0.03325980790752326	0.06921512773525494	-0.08877764032778784	0.20964687795990572
H1	65094	6885	64,79,103	0.006282780788223086	0.03321514189752284	0.8499726883872205	-0.1427290948694161	0.15529465644586227
H1	65094	6885	64,79,113	-0.08065186435330096	0.0331732345739503	0.01505052958705757	-0.22947573271870572	0.0681720040121038
H1	65094	6885	64,82,83	0.23811593245618665	0.03312244504935546	6.606857855461537e-13	0.08951991927643749	0.3867119456359358
H1	65094	6885	64,82,84	0.12583420844695342	0.033227176848977455	0.0001525768384554474	-0.02323165917300324	0.2749000760669101
H1	65094	6885	64,82,85	0.06728554770529493	0.033222238013067694	0.04283942680967726	-0.08175816299584593	0.2163292584064358
H1	65094	6885	64,82,92	0.01755148893823133	0.03317825759754579	0.5968034805360837	-0.13129491403412305	0.1663978919105857
H1	65094	6885	64,82,95	0.011800313163258247	0.033194545374591114	0.7222241792516445	-0.13711916106723812	0.16071978739375462
H1	65094	6885	64,82,103	0.07711898676513829	0.03316124183088513	0.02004460150905125	-0.07165107899590203	0.2258890525261786
H1	65094	6885	64,82,113	-0.02316297179049956	0.03312884482474892	0.48444335889353085	-0.1717876960484103	0.12546175246741118
H1	65094	6885	64,83,84	0.08617466091977122	0.033209096560133135	0.009463905239845055	-0.06281009376195276	0.2351594156014952
H1	65094	6885	64,83,85	-0.037034449034803074	0.03320945837663361	0.2647788633760151	-0.18602082692065322	0.11195192885104707
H1	65094	6885	64,83,92	-0.005966096468470905	0.033165918960638585	0.8572424091320807	-0.15475714506557456	0.14282495212863275
H1	65094	6885	64,83,95	0.022428223521879787	0.03317786747538266	0.49904361581103696	-0.12641642925968982	0.1712728763034494
H1	65094	6885	64,83,103	0.06666881449476159	0.03314827152853159	0.04430571744520041	-0.08204306307345055	0.21538069206297372
H1	65094	6885	64,83,113	-0.07323190048999528	0.03311893375903759	0.02702729550807836	-0.22181216109647958	0.07534836011648902
H1	65094	6885	64,84,85	-0.05461727132545208	0.033396346380652614	0.10196506889507792	-0.2044420780249651	0.09520753537406096
H1	65094	6885	64,84,92	-0.08032063069831474	0.033316869353122044	0.015920230785252613	-0.22978888251750956	0.06914762112088008
H1	65094	6885	64,84,95	0.05046022335816702	0.03332985056714042	0.1300401756498032	-0.09906626560645859	0.19998671232279264
H1	65094	6885	64,84,103	0.05631445833146598	0.03328667421267008	0.0906891058749581	-0.0930183301340459	0.20564724679697785
H1	65094	6885	64,84,113	-0.02162780880678772	0.033232385825237895	0.515174825541427	-0.17071704526633025	0.1274614276527548
H1	65094	6885	64,85,92	0.03145329034717803	0.03329252054182845	0.3447876604867465	-0.1179057262909031	0.18081230698525916
H1	65094	6885	64,85,95	-0.022589813398979808	0.03331668761882938	0.49775347006067616	-0.1720572499102676	0.126877623112308
H1	65094	6885	64,85,103	0.03453168632593784	0.033277668117727234	0.29942175094947954	-0.11476069842539077	0.18382407107726645
H1	65094	6885	64,85,113	-0.0365473452844709	0.033227980376170835	0.27138169048396465	-0.18561681773907188	0.11252212717013008
H1	65094	6885	64,92,95	0.04601865776885267	0.03325128715778275	0.16637410880734407	-0.1031553750472319	0.19519269058493724
H1	65094	6885	64,92,103	0.09305809012188693	0.033220035492706516	0.005091964753030318	-0.05597573949275411	0.24209191973652797
H1	65094	6885	64,92,113	0.02893633709948018	0.033186472198000326	0.38324923568494285	-0.11994691873429761	0.17781959293325797
H1	65094	6885	64,95,103	0.059844307957660936	0.03326224213014328	0.07199754257153146	-0.08937887175005088	0.20906748766537275
H1	65094	6885	64,95,113	-0.0726415958471458	0.033202693839540054	0.028686507175459244	-0.22159762623776694	0.07631443454347533
H1	65094	6885	64,103,113	0.06192868309910338	0.03316353460892243	0.061854565045682874	-0.08685166866814636	0.21070903486635312
H1	65094	6885	65,66,79	-0.154891096314848	0.0332083046526348	3.1046535629847025e-06	-0.3038722982909403	-0.0059098943387556335
H1	65094	6885	65,66,82	-0.18476742376562794	0.033158563093922594	2.5259635473359223e-08	-0.3335254720070559	-0.03600937552419997
H1	65094	6885	65,66,83	-0.07279513356709177	0.03314748159286795	0.028088826533538124	-0.22150346727584214	0.07591320014165859
H1	65094	6885	65,66,84	-0.016440881302402177	0.03324875306483141	0.6209682892392416	-0.1656035455100089	0.13272178290520453
H1	65094	6885	65,66,85	0.0011672164574964006	0.033229263882688494	0.9719792616413986	-0.14790801414542756	0.15024244706042036
H1	65094	6885	65,66,92	0.009198111714377566	0.033215346809365706	0.7818397934189207	-0.13981468323176396	0.1582109066605191
H1	65094	6885	65,66,95	0.06171493606035583	0.03322225466352317	0.06322542758924989	-0.08732884933911414	0.2107587214598258
H1	65094	6885	65,66,103	0.06285704493256583	0.03319061646031797	0.05825389297567118	-0.08604480315359717	0.21175889301872883
H1	65094	6885	65,66,113	0.044330736968486883	0.03317840771472005	0.1815113092843686	-0.10451633946905314	0.1931778134060269
H1	65094	6885	65,79,82	0.008466283076704828	0.03314600711129221	0.7983966001811218	-0.14023543571930783	0.15716800187271748
H1	65094	6885	65,79,83	-0.07290158192134899	0.033134790019406286	0.027800011358349832	-0.22155297788849934	0.07574981404580136
H1	65094	6885	65,79,84	-0.06691227684741796	0.03322979529843664	0.04405373329094357	-0.21598989152136683	0.0821653378265309
H1	65094	6885	65,79,85	-0.10958592989664684	0.033199896797831877	0.0009647053375363484	-0.25852941202140434	0.03935755222811066
H1	65094	6885	65,79,92	0.01074323649878739	0.03319200769016717	0.7461895191981626	-0.138164853010939	0.15965132600851378
H1	65094	6885	65,79,95	-0.0013974340136291286	0.03321425566322393	0.9664403930397226	-0.15040533379076299	0.14761046576350473
H1	65094	6885	65,79,103	-0.0012717106808284306	0.03317607923616245	0.9694229834290207	-0.15010834095022121	0.14756491958856435
H1	65094	6885	65,79,113	0.06375400851777657	0.03315306271428655	0.05448238893679473	-0.08497936357176486	0.212487380607318
H1	65094	6885	65,82,83	0.3001464797353464	0.03311249800945514	1.2900945401913862e-19	0.15159509159671136	0.44869786787398147
H1	65094	6885	65,82,84	0.08589773261785516	0.03317180261369934	0.009614482150524167	-0.06291971159667525	0.23471517683238557
H1	65094	6885	65,82,85	-0.021507147325181997	0.03315997277029426	0.516607527920697	-0.17027151974613206	0.12725722509576806
H1	65094	6885	65,82,92	0.023380257698582985	0.033148783169866074	0.4806184822750691	-0.12533391522742565	0.17209443062459162
H1	65094	6885	65,82,95	0.0668177400085983	0.033159935361719746	0.043907751808866594	-0.0819464645876328	0.2155819446048294
H1	65094	6885	65,82,103	0.026814089263284435	0.03313077095749987	0.4183223726190528	-0.12181927613350416	0.17544745466007303
H1	65094	6885	65,82,113	0.024923895848867783	0.03311861095365307	0.45171461038220584	-0.1236549165676323	0.17350270826536787
H1	65094	6885	65,83,84	0.04897667530244815	0.03316071150249929	0.1396947542707482	-0.09979101126576101	0.1977443618706573
H1	65094	6885	65,83,85	0.0030005712518724748	0.03315161988886407	0.9278818244531863	-0.1457263279427732	0.15172747044651816
H1	65094	6885	65,83,92	0.01381071292285413	0.03314175016487541	0.6768873474423966	-0.1348719080902227	0.16249333393593096
H1	65094	6885	65,83,95	0.02651307403235903	0.03314880250154211	0.4238183783484534	-0.12220118562064042	0.17522733368535848
H1	65094	6885	65,83,103	0.053126711336989096	0.03312337916340386	0.10874070041073979	-0.09547349252443349	0.20172691519841168
H1	65094	6885	65,83,113	0.038808112711740284	0.033112636957124734	0.24120061397792114	-0.10974389878274038	0.18736012420622095
H1	65094	6885	65,84,85	-0.0031100584007885956	0.03327001507717754	0.9255230993760715	-0.1523681095963458	0.14614799279476862
H1	65094	6885	65,84,92	-0.030122529211655813	0.03324995320450254	0.3649703006621483	-0.17929057756195255	0.11904551913864092
H1	65094	6885	65,84,95	-0.01834219619133659	0.033250027058880346	0.5811940255987857	-0.16751057587182594	0.13082618348915276
H1	65094	6885	65,84,103	-0.029991161090808238	0.033213784061474225	0.3665437881348961	-0.17899694513826964	0.11901462295665316
H1	65094	6885	65,84,113	-0.030005628097385828	0.0331893843679798	0.3659604069397495	-0.1789019486927779	0.11889069249800624
H1	65094	6885	65,85,92	0.03887094069359609	0.03321576486717644	0.2419028443531611	-0.11014372977000378	0.18788561115719596
H1	65094	6885	65,85,95	-0.0010431971785340166	0.03323099423015984	0.9749567933472542	-0.15012619057600032	0.1480397962189323
H1	65094	6885	65,85,103	0.012128445674886912	0.0331973331571727	0.7148559834312005	-0.1368035352825923	0.1610604266323661
H1	65094	6885	65,85,113	0.10269587032675798	0.033175262960356625	0.001965377674570057	-0.046137097914356995	0.25152883856787295
H1	65094	6885	65,92,95	0.06144020393413907	0.03321198496698644	0.06432715658338634	-0.08755750890155581	0.21043791676983395
H1	65094	6885	65,92,103	0.03719972435956742	0.033179750722689715	0.2622254778855299	-0.1116533771654824	0.18605282588461725
H1	65094	6885	65,92,113	-0.010498391617169589	0.03316674428929527	0.7515986006049578	-0.1592931428560246	0.13829635962168543
H1	65094	6885	65,95,103	-0.025194988060393664	0.033202722367289314	0.44796154180820846	-0.1741511464340124	0.12376117031322506
H1	65094	6885	65,95,113	0.02431842711456711	0.03317964477822989	0.46360278799432	-0.12453419911572944	0.17317105334486366
H1	65094	6885	65,103,113	0.055933561180859126	0.03314103552591927	0.09146587047942739	-0.09274585377361946	0.20461297613533772
H1	65094	6885	66,79,82	-0.03633985876686574	0.03314343234214906	0.27288982923133065	-0.18503002647028965	0.11235030893655817
H1	65094	6885	66,79,83	-0.0583544023570852	0.03313202054934737	0.07819812549148164	-0.2069933737520531	0.0902845690378827
H1	65094	6885	66,79,84	-0.11361013574658907	0.033234102459153814	0.0006301490743518839	-0.262707073478052	0.03548680198487389
H1	65094	6885	66,79,85	-0.06472417487881321	0.03320356204621399	0.0512627103604086	-0.21368410027326545	0.08423575051563903
H1	65094	6885	66,79,92	-0.024438918295267786	0.03319085245694866	0.46154206461226777	-0.17334182512447927	0.12446398853394369
H1	65094	6885	66,79,95	0.019065757351174772	0.03320795872422081	0.5658805850281716	-0.12991389269893241	0.16804540740128196
H1	65094	6885	66,79,103	-0.004097713747647891	0.03317432164603666	0.9016952502622468	-0.1529264590047746	0.14473103150947883
H1	65094	6885	66,79,113	0.03136169459301419	0.03315982505923076	0.3442678846066549	-0.11740201515719687	0.18012540434322524
H1	65094	6885	66,82,83	0.06690771984360544	0.03309730338895143	0.04322784691754432	-0.0815755012250785	0.21539094091228939
H1	65094	6885	66,82,84	0.10591949044496352	0.033163827950988684	0.0014047552675066069	-0.04286217733206382	0.25470115822199085
H1	65094	6885	66,82,85	0.02059545536875218	0.03315337271137397	0.5344589581949175	-0.12813930744937885	0.1693302181868832
H1	65094	6885	66,82,92	-0.04071972382298494	0.033136992692275664	0.21914059712943856	-0.18938100156082707	0.10794155391485719
H1	65094	6885	66,82,95	-0.04958041574616501	0.03314408972310981	0.13468378599393507	-0.19827353263373768	0.09911270114140766
H1	65094	6885	66,82,103	-0.013762529708240878	0.03312383177292686	0.6777867798999502	-0.16236476409520423	0.13483970467872247
H1	65094	6885	66,82,113	0.01260278393844616	0.03311092826127038	0.7034843318930282	-0.13594156189634918	0.1611471297732415
H1	65094	6885	66,83,84	0.09962442748114148	0.0331530978381591	0.002657105330964946	-0.04910910218334408	0.24835795714562703
H1	65094	6885	66,83,85	0.05802426559886675	0.03314499720484342	0.08001680871152625	-0.09067292249080006	0.20672145368853356
H1	65094	6885	66,83,92	-0.014679570885870907	0.0331301216933341	0.6577034796515429	-0.16331002351259102	0.1339508817408492
H1	65094	6885	66,83,95	0.0010790095423787172	0.03313368525818602	0.9740213259094932	-0.14756743017493554	0.14972544925969297
H1	65094	6885	66,83,103	0.024211909411540056	0.033116569512592973	0.4647139087276556	-0.12435774456263429	0.1727815633857144
H1	65094	6885	66,83,113	0.02065140520951303	0.033105409236451167	0.5327564057871914	-0.1278681808261928	0.16917099124521887
H1	65094	6885	66,84,85	-0.00961746165471794	0.033270288461752784	0.772528394528847	-0.15887673932549112	0.13964181601605524
H1	65094	6885	66,84,92	0.047456289155121345	0.03323553555714986	0.15333234962554887	-0.10164707783144009	0.19655965614168278
H1	65094	6885	66,84,95	0.011117290943860492	0.03323624902204477	0.7380088159960824	-0.13798927683415127	0.16022385872187225
H1	65094	6885	66,84,103	-0.05633666965809114	0.033209007027989804	0.08981031418464208	-0.20532102267503674	0.09264768335885445
H1	65094	6885	66,84,113	-0.02393685693412606	0.033186415594238725	0.47073720770506144	-0.17281985882851947	0.12494614496026735
H1	65094	6885	66,85,92	0.01825479421377718	0.03321390176615076	0.5825869072301878	-0.1307515178878674	0.16726110631542176
H1	65094	6885	66,85,95	-0.0036265441403839915	0.03321886446113067	0.9130670589870706	-0.15265512019891772	0.14540203191814974
H1	65094	6885	66,85,103	-0.01491433804843989	0.03319881491956591	0.6532579823050021	-0.16385296658232182	0.13402429048544204
H1	65094	6885	66,85,113	0.04286699913942929	0.033175549752217155	0.19631855182546334	-0.10596725572551505	0.19170125400437363
H1	65094	6885	66,92,95	-0.00882123807893409	0.033191979828667645	0.7904218012233174	-0.1577292025946347	0.1400867264367665
H1	65094	6885	66,92,103	-0.046991601520219584	0.03317094896323628	0.15659083970240506	-0.19580521603391507	0.1018220129934759
H1	65094	6885	66,92,113	-0.029245629845703003	0.03316850104204484	0.37792700592755	-0.1780482623401338	0.11955700264872779
H1	65094	6885	66,95,103	0.02439060767275425	0.03318668023724191	0.46237185999750097	-0.12449358147986031	0.1732747968253688
H1	65094	6885	66,95,113	0.035369290489880134	0.03316905726834037	0.2862771491708742	-0.11343583738222637	0.18417441836198664
H1	65094	6885	66,103,113	-0.033279448614202733	0.03313971974928257	0.3152785145090422	-0.18195296064810412	0.11539406341969866
H1	65094	6885	79,82,83	-0.06237791201475951	0.033092089841437695	0.05943757830465063	-0.21083774373601125	0.08608191970649223
H1	65094	6885	79,82,84	-0.009237329572812425	0.03315556890723904	0.7805484486899456	-0.1579819451040878	0.13950728595846296
H1	65094	6885	79,82,85	-0.043851342061074106	0.0331354799197505	0.18570911514278451	-0.1925058331028933	0.10480314898074508
H1	65094	6885	79,82,92	-0.04244425789350842	0.033126632752446546	0.2001029210388405	-0.19105905821239508	0.10617054242537824
H1	65094	6885	79,82,95	0.005709922421845204	0.033141843648887136	0.8632121803035067	-0.14297311798513257	0.15439296282882298
H1	65094	6885	79,82,103	0.01777762893170598	0.03311608009556126	0.5913886915071315	-0.13078982938874817	0.16634508725216013
H1	65094	6885	79,82,113	0.04270301469652571	0.03309591711232103	0.19695842914498063	-0.10577398717003911	0.19118001656309053
H1	65094	6885	79,83,84	-0.08506088068190976	0.033142779949452125	0.010275597214739045	-0.23374812157985034	0.06362636021603083
H1	65094	6885	79,83,85	-0.0558211835291198	0.03312407233917077	0.09195245870042132	-0.2044244971596202	0.09278213010138059
H1	65094	6885	79,83,92	-0.06810205963346722	0.033115503309816316	0.03973871504205326	-0.21666693034114007	0.08046281107420564
H1	65094	6885	79,83,95	-0.0003065018421810617	0.0331270644123905	0.9926178623870232	-0.1489232387012786	0.14831023501691648
H1	65094	6885	79,83,103	-0.0055102371310769005	0.03310345441220358	0.8677994333558017	-0.15402105331029342	0.14300057904813962
H1	65094	6885	79,83,113	0.049247814117470146	0.0330867651134902	0.13663912139605816	-0.0991881294716378	0.1976837577065781
H1	65094	6885	79,84,85	-0.10504802308761718	0.033245436940059034	0.0015797307046675393	-0.2541958102860041	0.04409976411076971
H1	65094	6885	79,84,92	-0.12342783597182522	0.03322218990161682	0.00020321448048734618	-0.27247133083232455	0.025615658888674148
H1	65094	6885	79,84,95	0.02538389570249322	0.03323513624880057	0.4450092839804346	-0.12371767988163265	0.1744854712866191
H1	65094	6885	79,84,103	-0.06214968445238234	0.03320062919522849	0.06121950442489231	-0.21109645230477975	0.08679708340001507
H1	65094	6885	79,84,113	-0.007764852801926847	0.03316514266746114	0.814887268654961	-0.15655241874335532	0.14102271313950163
H1	65094	6885	79,85,92	0.062364115134121434	0.03318100974609776	0.06017957020907006	-0.08649463470157262	0.2112228649698155
H1	65094	6885	79,85,95	0.055981216013542334	0.03320189595337848	0.09178480392227815	-0.09297123484958908	0.20493366687667375
H1	65094	6885	79,85,103	0.024937774066700058	0.03317080758409994	0.45217509032410874	-0.12387520618294953	0.17375075431634965
H1	65094	6885	79,85,113	0.06083671391207002	0.03314074495153903	0.06640602711287023	-0.08784139744919944	0.20951482527333948
H1	65094	6885	79,92,95	0.0468909255188919	0.03318050810944384	0.1576002234516717	-0.10196557384263802	0.19574742488042182
H1	65094	6885	79,92,103	0.004134375022448955	0.03315373283948272	0.9007589917009917	-0.14460200342523824	0.15287075347013615
H1	65094	6885	79,92,113	-0.01262870280207018	0.03313528623864386	0.7031115116253444	-0.16128232493942798	0.13602491933528763
H1	65094	6885	79,95,103	0.006797025391702793	0.03318345569527891	0.8377042940709964	-0.1420726976162984	0.15566674839970399
H1	65094	6885	79,95,113	0.011692691449315534	0.03315214558380759	0.7243162262894693	-0.13703656615131857	0.16042194904994964
H1	65094	6885	79,103,113	0.005060965135994744	0.033118802652414514	0.8785467147322527	-0.14351870729164398	0.15364063756363347
H1	65094	6885	82,83,84	-0.1070900909731276	0.03310354805164888	0.0012170915500332722	-0.25560132724356105	0.04142114529730584
H1	65094	6885	82,83,85	-0.030599771444088097	0.033102195954407276	0.3552803309321021	-0.17910494185014364	0.11790539896196744
H1	65094	6885	82,83,92	0.02113779910859298	0.03309005225364378	0.522958044551433	-0.1273128914571001	0.16958848967428605
H1	65094	6885	82,83,95	0.05381706283445453	0.033092175369305595	0.10389603255108132	-0.09464315258734124	0.2022772782562503
H1	65094	6885	82,83,103	-0.003970988938711839	0.0330781463737162	0.9044449729778223	-0.15236826659095606	0.14442628871353239
H1	65094	6885	82,83,113	-0.03437914247228491	0.0330649763915863	0.2984627264243129	-0.18271733611562715	0.11395905117105734
H1	65094	6885	82,84,85	-0.028692951653557786	0.03319100251112694	0.38732792746840106	-0.17759653166533834	0.12021062835822277
H1	65094	6885	82,84,92	0.056588441491712604	0.03316179142590862	0.08793245328205392	-0.09218408989737031	0.20536097288079552
H1	65094	6885	82,84,95	0.05887281331877592	0.0331643167345744	0.07587249185354775	-0.08991104727016602	0.20765667390771786
H1	65094	6885	82,84,103	0.012169569497407162	0.03313761183255635	0.713438798246997	-0.1364944858668201	0.1608336248616344
H1	65094	6885	82,84,113	0.019971789286147512	0.03311394924454934	0.5464291187781919	-0.12858610947538582	0.16852968804768084
H1	65094	6885	82,85,92	0.026585513045429776	0.0331407995401267	0.422441185762645	-0.12209284321462299	0.17526386930548254
H1	65094	6885	82,85,95	-0.046050113942762705	0.033152823462511104	0.16483033988438042	-0.19478241268581886	0.10268218480029345
H1	65094	6885	82,85,103	0.044349483928315836	0.03313072034836788	0.1806992560799881	-0.10428365442257584	0.1929826222792075
H1	65094	6885	82,85,113	0.06524789704759959	0.03310830493002213	0.0487582284746319	-0.08328467983221194	0.21378047392741112
H1	65094	6885	82,92,95	0.04986929633547055	0.033126777140878	0.13222478705187798	-0.09874615174795254	0.19848474441889363
H1	65094	6885	82,92,103	0.004298441657456742	0.03310803349187239	0.8967007624203897	-0.14423291747931632	0.1528298007942298
H1	65094	6885	82,92,113	-0.026387253017500112	0.03309677109492396	0.4252941526620456	-0.17486808607496682	0.12209358003996659
H1	65094	6885	82,95,103	-0.007233150112292974	0.03312966442879432	0.8271739315947648	-0.15586155132984092	0.14139525110525497
H1	65094	6885	82,95,113	0.013840571608464303	0.0331051787727661	0.6758910867091141	-0.13467798050644456	0.16235912372337316
H1	65094	6885	82,103,113	-0.012525335843557528	0.033081565251446864	0.7049715925651516	-0.1609379514818583	0.13588727979474324
H1	65094	6885	83,84,85	-0.005906337595771527	0.03317649978685457	0.8587018023582476	-0.15474485456634524	0.14293217937480218
H1	65094	6885	83,84,92	0.007392664193558329	0.033151115043501184	0.8235370980508891	-0.14133197013180956	0.15611729851892622
H1	65094	6885	83,84,95	0.05070001854884909	0.033149925981294695	0.12616684718092697	-0.09801928133025303	0.19941931842795121
H1	65094	6885	83,84,103	-0.023144884567358526	0.0331278116954317	0.4847709581777898	-0.17176497393501855	0.1254752048003015
H1	65094	6885	83,84,113	0.01706841515834645	0.033105625962628386	0.6061536116597641	-0.13145214316807763	0.16558897348477053
H1	65094	6885	83,85,92	0.05262363879938825	0.03313352574766684	0.11223991301809859	-0.09602208531172077	0.20126936291049727
H1	65094	6885	83,85,95	-0.018932908193122655	0.033141314378814284	0.5678133279825026	-0.1676135741551401	0.1297477577688948
H1	65094	6885	83,85,103	0.03324258931851087	0.033123052440762246	0.3155713482479065	-0.11535614877908038	0.18184132741610212
H1	65094	6885	83,85,113	0.03237292445688056	0.03310239899158305	0.32809664327880317	-0.11613315682742695	0.18087900574118806
H1	65094	6885	83,92,95	0.051836298314698936	0.03311830161723679	0.11754476573457254	-0.09674112633715631	0.2004137229665542
H1	65094	6885	83,92,103	-0.012004682177675363	0.033101999478092475	0.7168622080109563	-0.16050897113922943	0.1364996067838787
H1	65094	6885	83,92,113	0.02454268878566035	0.03309207575996636	0.45830331448448036	-0.12391707976240182	0.17300245733372252
H1	65094	6885	83,95,103	-0.01082304844136528	0.03311837030781646	0.7438211333022118	-0.15940078125725451	0.13775468437452396
H1	65094	6885	83,95,113	0.004126289510518744	0.03309710560340953	0.9007834844144279	-0.14435604424012613	0.15260862326116362
H1	65094	6885	83,103,113	-0.013872276255525229	0.03307622161652424	0.6749229658977961	-0.16226091894001154	0.1345163664289611
H1	65094	6885	84,85,92	-0.016855398869646265	0.03326390514582355	0.6123550533257056	-0.16608603930374996	0.13237524156445743
H1	65094	6885	84,85,95	-0.0066649520156070174	0.033279551495636835	0.8412688019017139	-0.15596578609633327	0.14263588206511923
H1	65094	6885	84,85,103	-0.04593180247896722	0.03324374154304424	0.16707907258549706	-0.1950719836797661	0.10320837872183167
H1	65094	6885	84,85,113	-0.04405892924168531	0.03320207555141131	0.1845161298356821	-0.1930121858288994	0.10489432734552878
H1	65094	6885	84,92,95	-0.023974114254759926	0.03322852241659406	0.4706097375243844	-0.1730460184454768	0.12509778993595694
H1	65094	6885	84,92,103	-0.07146395444354903	0.03320480360785933	0.03138433826705614	-0.22042944981057846	0.07750154092348041
H1	65094	6885	84,92,113	-0.06685678486835744	0.03317903568272013	0.043905991441266556	-0.21570667853575712	0.08199310879904223
H1	65094	6885	84,95,103	-0.004314995039371827	0.03322871315703776	0.8966796797122308	-0.15338775494196152	0.14475776486321787
H1	65094	6885	84,95,113	-0.030750441442703114	0.03318183101059685	0.3540730339160749	-0.17961287568726705	0.11811199280186083
H1	65094	6885	84,103,113	-0.05634915883799674	0.03314958656731435	0.08916542810418629	-0.20506693601657897	0.09236861834058549
H1	65094	6885	85,92,95	0.05678372341340887	0.03320444888996093	0.08724828344917769	-0.0921801805956931	0.20574762742251085
H1	65094	6885	85,92,103	0.054985515388331185	0.03318051877282185	0.09749199113598597	-0.09387103181192127	0.20384206258858364
H1	65094	6885	85,92,113	0.01023007910168583	0.03315742224011928	0.7576797301793441	-0.1385228509690714	0.15898300917244307
H1	65094	6885	85,95,103	0.0030447441770062866	0.033211354343291456	0.9269543450176482	-0.1459501395146821	0.15203962786869468
H1	65094	6885	85,95,113	0.032954014557187605	0.033168974498496775	0.32046110577736336	-0.11585074198759837	0.18175877110197358
H1	65094	6885	85,103,113	0.023451887032487073	0.033139665153474746	0.47915416596590865	-0.1252213800702395	0.17212515413521365
H1	65094	6885	92,95,103	0.00014653453429325225	0.03317407598180106	0.9964756588778483	-0.14868110860836284	0.14897417767694934
H1	65094	6885	92,95,113	0.0495826700442652	0.033151132515092316	0.13474890233857337	-0.09914204266326265	0.19830738275179305
H1	65094	6885	92,103,113	-0.038242313662475436	0.033123260518329714	0.24828130743305185	-0.18684198525084345	0.11035735792589257
H1	65094	6885	95,103,113	0.02335212923894603	0.03314280315565795	0.4810674618434394	-0.12533521576814655	0.1720394742460386
H1	65094	6885	30,35,36,57	0.12661731252638342	0.02492936764271293	3.8051078342816477e-07	0.01477760270787569	0.23845702234489113
H1	65094	6885	30,35,36,64	-0.05222082721119348	0.02497877275312672	0.03656752633791235	-0.16428218136867606	0.059840526946289094
H1	65094	6885	30,35,36,65	-0.11837752736469431	0.024978003403294338	2.149943973471903e-06	-0.23043543001617658	-0.006319624713212041
H1	65094	6885	30,35,36,66	-0.07638983071181865	0.02498017898042267	0.0022290747919197183	-0.18845749357536115	0.03567783215172385
H1	65094	6885	30,35,36,79	-0.046732699301508474	0.024963360921611763	0.061204477974038045	-0.15872491192322857	0.06525951332021163
H1	65094	6885	30,35,36,82	-0.1313670828424729	0.024932153626511168	1.3766907760697185e-07	-0.24321929131814754	-0.019514874366798246
H1	65094	6885	30,35,36,83	-0.0013149686142035766	0.024929946668724976	0.9579340321498957	-0.11315727609592094	0.11052733886751379
H1	65094	6885	30,35,36,84	-0.0066228940970947114	0.02497458381504274	0.7908676083930761	-0.11866545557493637	0.10541966738074694
H1	65094	6885	30,35,36,85	0.04520129725810862	0.024971289432912176	0.07028067822425556	-0.06682648475373157	0.1572290792699488
H1	65094	6885	30,35,36,92	-0.02686812247667164	0.024967204458505712	0.2818706301256108	-0.13887757821731303	0.08514133326396975
H1	65094	6885	30,35,36,95	0.0019052042485889764	0.024970167843611717	0.9391813112011405	-0.11011754601821473	0.11392795451539268
H1	65094	6885	30,35,36,103	-0.037664370226605515	0.024957190109050533	0.1312635606817612	-0.14962889895773987	0.07430015850452884
H1	65094	6885	30,35,36,113	0.041291022678704103	0.024947638355524448	0.09790809040741531	-0.07063065437011222	0.15321269972752044
H1	65094	6885	30,35,57,64	-0.11863734338398002	0.024943900598669282	1.9777559829849732e-06	-0.23054225187099225	-0.006732434896967801
H1	65094	6885	30,35,57,65	-0.07956231073848152	0.024947968499994276	0.0014277731371792515	-0.1914854689023519	0.03236084742538885
H1	65094	6885	30,35,57,66	-0.10125956400084546	0.02494757427933425	4.9369993091558736e-05	-0.2131809535869944	0.0106618255853035
H1	65094	6885	30,35,57,79	0.010897419896634647	0.02493017932773754	0.6620276931307527	-0.10094593135469711	0.1227407711479664
H1	65094	6885	30,35,57,82	-0.2823744922029363	0.024909392262938448	9.345287699314773e-30	-0.3941245872061182	-0.17062439719975445
H1	65094	6885	30,35,57,83	0.03281776390628055	0.02490733782957819	0.18764471359839993	-0.0789231143676948	0.14455864218025588
H1	65094	6885	30,35,57,84	-0.029753384798252736	0.02494233286000291	0.23291849082451774	-0.14165125999665407	0.0821444904001486
H1	65094	6885	30,35,57,85	-0.047148587941791664	0.024938582698775257	0.058684310828140455	-0.15902963892910651	0.06473246304552319
H1	65094	6885	30,35,57,92	0.06417193504909624	0.024934626416622974	0.010066896234852622	-0.04769136701437052	0.176035237112563
H1	65094	6885	30,35,57,95	-0.008553530382924168	0.0249380437093163	0.7316062935669214	-0.12043216332155247	0.10332510255570414
H1	65094	6885	30,35,57,103	0.005894402502547802	0.02492590735300602	0.8130634248494659	-0.10592978354486975	0.11771858854996535
H1	65094	6885	30,35,57,113	0.0942059302260656	0.02491922359465564	0.0001567000402197579	-0.017588270720842514	0.20600013117297372
H1	65094	6885	30,35,64,65	-0.0445028815223697	0.024997161979144155	0.07502925175374968	-0.15664673459161982	0.06764097154688042
H1	65094	6885	30,35,64,66	-0.03771412345564373	0.024999053434843155	0.13140082134438147	-0.1498664620933825	0.07443821518209502
H1	65094	6885	30,35,64,79	0.05978559687848428	0.024981095482109947	0.01670375270551309	-0.05228617765304043	0.171857371410009
H1	65094	6885	30,35,64,82	-0.09495635072280739	0.024948517431859177	0.00014132441098829192	-0.2068819715396163	0.016969270094001496
H1	65094	6885	30,35,64,83	-0.08362926849109292	0.024944605828398546	0.0008010749597922733	-0.19553734082443316	0.02827880384224732
H1	65094	6885	30,35,64,84	0.06737179876501875	0.024997419014860984	0.007037710981240728	-0.04477320743416209	0.17951680496419958
H1	65094	6885	30,35,64,85	-0.041415518711886534	0.02499269847851754	0.09750369359842735	-0.15353934734160773	0.07070830991783467
H1	65094	6885	30,35,64,92	0.06074432481160841	0.024985969717328884	0.015054504343590716	-0.051349316823016786	0.17283796644623362
H1	65094	6885	30,35,64,95	-0.02056498601491119	0.024990971169144584	0.410570149102483	-0.13268106547979971	0.09155109344997733
H1	65094	6885	30,35,64,103	0.003391945153901732	0.024977834223355203	0.8919812765056541	-0.10866519851181038	0.11544908881961384
H1	65094	6885	30,35,64,113	-0.059653715268183305	0.024965565286101617	0.01687725223490845	-0.17165581724965023	0.05234838671328361
H1	65094	6885	30,35,65,66	-0.07511107487887142	0.024998561712371473	0.002660296000623878	-0.18726120752007902	0.03703905776233617
H1	65094	6885	30,35,65,79	0.02569335807995654	0.02498231211295133	0.30373684191360445	-0.08638387457799185	0.13777059073790493
H1	65094	6885	30,35,65,82	-0.010443924309968544	0.02495217673544299	0.6755409943554558	-0.12238596172654109	0.101498113106604
H1	65094	6885	30,35,65,83	0.006769516605242748	0.024948291267356322	0.786129050097898	-0.10515508957803299	0.11869412278851849
H1	65094	6885	30,35,65,84	0.06490042314534628	0.0249945875357313	0.009418089524437595	-0.047231880292626996	0.17703272658331953
H1	65094	6885	30,35,65,85	-0.10491732212883331	0.024988797615533746	2.6899938329471297e-05	-0.21702365045969407	0.007189006202027448
H1	65094	6885	30,35,65,92	0.023055617388859417	0.024987330194441954	0.3561713996264041	-0.08904412770445438	0.13515536248217322
H1	65094	6885	30,35,65,95	-0.03893842553090432	0.024991800560271022	0.11922730055026352	-0.15105822586285356	0.07318137480104493
H1	65094	6885	30,35,65,103	0.036730031063177404	0.024977117945897007	0.14141901528690198	-0.07532389919318463	0.14878396131953944
H1	65094	6885	30,35,65,113	0.052580445336992354	0.024967515223664513	0.03521259545783519	-0.059430404578009174	0.1645912952519939
H1	65094	6885	30,35,66,79	0.054437752949698825	0.024983926315556307	0.029342273953375964	-0.057646721446327986	0.16652222734572564
H1	65094	6885	30,35,66,82	-0.024136765672839178	0.024951737585292927	0.33337907745624173	-0.13607683294616324	0.0878033016004849
H1	65094	6885	30,35,66,83	-0.04800115713241683	0.024947870874723534	0.05435215069802594	-0.15992387732360747	0.0639215630587738
H1	65094	6885	30,35,66,84	0.031428011263834876	0.024997203477750148	0.20866415354156576	-0.08071602797909275	0.1435720505067625
H1	65094	6885	30,35,66,85	-0.030853509341110197	0.024993080794183487	0.21702831910063083	-0.1429790531396135	0.08127203445739313
H1	65094	6885	30,35,66,92	0.02043709014912709	0.024989560039603495	0.41346039500705756	-0.0916726586169385	0.1325468389151927
H1	65094	6885	30,35,66,95	-0.029803041754099757	0.024992721435883086	0.23308231951558855	-0.14192697337660992	0.08232088986841042
H1	65094	6885	30,35,66,103	0.003759820084680454	0.024977411474127267	0.8803479423402956	-0.10829542701663997	0.11581506718600088
H1	65094	6885	30,35,66,113	0.05977657945797343	0.024970986528451873	0.016676105646761103	-0.05224984364467064	0.1718030025606175
H1	65094	6885	30,35,79,82	-0.012373779169528865	0.024934208832599877	0.6197148750539232	-0.1242352078410734	0.09948764950201568
H1	65094	6885	30,35,79,83	0.020643049462279905	0.024930657843379094	0.4076633371273667	-0.0912024485362643	0.1324885474608241
H1	65094	6885	30,35,79,84	0.08910364634576151	0.024977073162527896	0.0003608062600768876	-0.02295008300061044	0.20115737569213346
H1	65094	6885	30,35,79,85	0.0025175240413604083	0.024970813427316073	0.9196947580757879	-0.10950812248399239	0.1145431705667132
H1	65094	6885	30,35,79,92	0.009826094125286594	0.02496972513450204	0.6939366632198031	-0.10219467003183837	0.12184685828241155
H1	65094	6885	30,35,79,95	-0.024071848742070134	0.024974873517241848	0.3351288149514421	-0.1361157099002866	0.08797201241614634
H1	65094	6885	30,35,79,103	0.020574934204925732	0.0249609155063929	0.40978042621441413	-0.09140630763998273	0.1325561760498342
H1	65094	6885	30,35,79,113	0.029810878201712132	0.024950130715649006	0.2321628120547433	-0.08212198023112839	0.14174373663455264
H1	65094	6885	30,35,82,83	-0.2996086367973545	0.024909841298440993	2.7827445382702402e-33	-0.4113607462920799	-0.18785652730262908
H1	65094	6885	30,35,82,84	0.0370680407535145	0.024946337085077784	0.13730803643984546	-0.07484779845331417	0.14898387996034318
H1	65094	6885	30,35,82,85	-0.19870874663799176	0.02494171513641084	1.655995206000804e-15	-0.31060385056564627	-0.08681364271033726
H1	65094	6885	30,35,82,92	0.015794737007577497	0.024938129552017105	0.526503076942192	-0.0960842810440182	0.1276737550591732
H1	65094	6885	30,35,82,95	-0.0004703295807754332	0.02494206577413078	0.9849553415620429	-0.11236700656160206	0.1114263474000512
H1	65094	6885	30,35,82,103	0.03491364740500558	0.024930056513696418	0.16137973810956086	-0.07692915287018762	0.14675644768019877
H1	65094	6885	30,35,82,113	0.06771789315767685	0.024921689401351043	0.00658508559775512	-0.044087370047577915	0.1795231563629316
H1	65094	6885	30,35,83,84	0.04153384748479863	0.024942611833269273	0.09588295835427688	-0.07036527926115915	0.1534329742307564
H1	65094	6885	30,35,83,85	0.09062444897609756	0.02493903431534439	0.00027947468876018814	-0.021258628082105435	0.20250752603430056
H1	65094	6885	30,35,83,92	0.05026510313965993	0.02493513929464538	0.04382191633685322	-0.06160049982971108	0.16213070610903094
H1	65094	6885	30,35,83,95	-0.0007257024858808858	0.024938575804633767	0.976785257607431	-0.11260672254426105	0.11115531757249927
H1	65094	6885	30,35,83,103	0.02665876402254075	0.02492646843080188	0.2848505615548386	-0.08516793916766092	0.1384854672127424
H1	65094	6885	30,35,83,113	0.05793206934548789	0.024919661026387336	0.020088565847927273	-0.05386409403539125	0.16972823272636703
H1	65094	6885	30,35,84,85	0.09387528497944059	0.024989964279281723	0.0001724607725124549	-0.018236277312301152	0.20598684727118233
H1	65094	6885	30,35,84,92	0.02004294809569207	0.024982792961539605	0.42240000303141656	-0.09203644177568228	0.1321223379670664
H1	65094	6885	30,35,84,95	0.05241889984228498	0.024987317682155206	0.03592533157170449	-0.05968078911761464	0.16451858880218462
H1	65094	6885	30,35,84,103	-0.03516124359709483	0.024974727736113242	0.15917403484571496	-0.1472044507427686	0.07688196354857894
H1	65094	6885	30,35,84,113	0.029368427261310615	0.02496254605832952	0.23940007454935813	-0.08262012966908454	0.14135698419170578
H1	65094	6885	30,35,85,92	-0.006293671600832829	0.024977847024284856	0.801065034062014	-0.11835087269488721	0.10576352949322156
H1	65094	6885	30,35,85,95	-0.05374557281193426	0.024981956191266617	0.03145066145775868	-0.16582120871145273	0.058330063087584205
H1	65094	6885	30,35,85,103	-0.06792857245179262	0.02496874177343137	0.006519385743837324	-0.17994492499213022	0.044087780088544984
H1	65094	6885	30,35,85,113	0.03955821025618911	0.02495819513728368	0.11297658280250657	-0.07241082729633076	0.15152724780870896
H1	65094	6885	30,35,92,95	0.017079482259682255	0.024980158639468834	0.4941534949543612	-0.0949880893489834	0.1291470538683479
H1	65094	6885	30,35,92,103	0.08011889965750552	0.024965853542330003	0.0013320513681481605	-0.03188449551733069	0.19212229483234172
H1	65094	6885	30,35,92,113	0.04221898339326824	0.024956123898751906	0.09070312484644674	-0.06974076203761909	0.15417872882415556
H1	65094	6885	30,35,95,103	0.021621680835820722	0.02497216751263486	0.38658632574740825	-0.0904100404729479	0.13365340214458934
H1	65094	6885	30,35,95,113	0.04895232597872479	0.02495903750820625	0.04984802313085287	-0.06302049067164024	0.1609251426290898
H1	65094	6885	30,35,103,113	0.03570057796039516	0.024945097081621688	0.1523879779380963	-0.0762096982643037	0.147610854185094
H1	65094	6885	30,36,57,64	0.04147485577997412	0.02494685412815213	0.09641223966622017	-0.07044330301827889	0.15339301457822713
H1	65094	6885	30,36,57,65	0.07387316565753177	0.024945814300503015	0.0030642209769458106	-0.03804032819998929	0.18578665951505283
H1	65094	6885	30,36,57,66	-0.018107575631864048	0.024946386235747384	0.46792772210796196	-0.13002363534154318	0.09380848407781509
H1	65094	6885	30,36,57,79	-0.01158162642981675	0.024932703657475703	0.6422802196580031	-0.12343630248928038	0.10027304962964688
H1	65094	6885	30,36,57,82	-0.037590700490030104	0.024911931719784588	0.13131861847499718	-0.1493521881655348	0.0741707871854746
H1	65094	6885	30,36,57,83	-0.08847636477938692	0.02490944613764844	0.0003827328081358063	-0.2002267014787088	0.023273971919934952
H1	65094	6885	30,36,57,84	0.0031345264069730927	0.024946148856018764	0.9000080579798231	-0.10878046835471593	0.11504952116866211
H1	65094	6885	30,36,57,85	0.0186523152363951	0.024940791593723442	0.4545453344612115	-0.093238645435496	0.13054327590828618
H1	65094	6885	30,36,57,92	0.004526068463979294	0.02493624489964197	0.855971358293051	-0.10734449454063065	0.11639663146858924
H1	65094	6885	30,36,57,95	-0.0034696695519840226	0.024937382617039507	0.8893437363953822	-0.1153453366565222	0.10840599755255416
H1	65094	6885	30,36,57,103	0.06035158657895989	0.024928644667683658	0.01548204623859096	-0.05148487978312975	0.17218805294104955
H1	65094	6885	30,36,57,113	0.02478929710707367	0.024918588766337287	0.31983211793487465	-0.08700205583277999	0.13658065004692732
H1	65094	6885	30,36,64,65	-0.01448264160241819	0.024996858202012057	0.5623360665903705	-0.12662513184743665	0.09765984864260027
H1	65094	6885	30,36,64,66	0.0003213810925910554	0.024999410396035926	0.9897430841939778	-0.11183255896708459	0.1124753211522667
H1	65094	6885	30,36,64,79	0.02643216309640395	0.02498420419564391	0.2900803609483173	-0.08565355794289145	0.13851788413569935
H1	65094	6885	30,36,64,82	-0.08665511585487007	0.02495179641859569	0.0005152392681054228	-0.19859544706988747	0.02528521536014733
H1	65094	6885	30,36,64,83	-0.049503174208030076	0.024947771723536762	0.04723017258689658	-0.16142544958087973	0.062419101164819565
H1	65094	6885	30,36,64,84	-0.0001419613566560618	0.02500146114462472	0.9954695576028509	-0.11230510161468285	0.11202117890137073
H1	65094	6885	30,36,64,85	-0.004285563562084427	0.02499627244108272	0.8638720277294265	-0.11642542592928026	0.10785429880511141
H1	65094	6885	30,36,64,92	-0.00471402509309482	0.024988788507775576	0.8503712455845291	-0.11682031256415339	0.10739226237796375
H1	65094	6885	30,36,64,95	0.033439635155395164	0.024991789091411535	0.18089355936777107	-0.07868011372422945	0.14555938403501978
H1	65094	6885	30,36,64,103	0.013780353460062122	0.024981102669451985	0.5812032332856643	-0.09829145331577217	0.1258521602358964
H1	65094	6885	30,36,64,113	-0.047951656736861	0.024966003938558752	0.054777183207077515	-0.15995572662879481	0.0640524131550728
H1	65094	6885	30,36,65,66	-0.0697272463138644	0.02499386818335369	0.0052761971842947095	-0.18185632254758916	0.04240182991986037
H1	65094	6885	30,36,65,79	-0.013419227236991682	0.024981621401089605	0.5911564013825044	-0.12549336117958995	0.09865490670560659
H1	65094	6885	30,36,65,82	-0.17802421890365538	0.024950856813950283	9.79164417186696e-13	-0.28996033480473493	-0.06608810300257587
H1	65094	6885	30,36,65,83	0.049661952568211126	0.024946367689301027	0.04651317395585222	-0.06225402393722437	0.16157792907364663
H1	65094	6885	30,36,65,84	0.053886165340694014	0.024994869603664403	0.03109641540665798	-0.05824740352832587	0.1660197342097139
H1	65094	6885	30,36,65,85	0.11695666973700003	0.024988613090497096	2.8696136800758222e-06	0.004851169234058886	0.2290621702399412
H1	65094	6885	30,36,65,92	0.04949301374403847	0.02498520836848498	0.04760802096977599	-0.06259721227912825	0.16158323976720518
H1	65094	6885	30,36,65,95	-0.023901756851402167	0.024987122779627845	0.33879184999182466	-0.13600057142722533	0.088197057724421
H1	65094	6885	30,36,65,103	0.02736817872994146	0.02497656873470315	0.2731909140336538	-0.08468328762033879	0.1394196450802217
H1	65094	6885	30,36,65,113	0.10973856595165521	0.024963441963309053	1.1047366008254931e-05	-0.0022540102444658927	0.2217311421477763
H1	65094	6885	30,36,66,79	0.03240819345767476	0.024984554414370776	0.19459189968208832	-0.07967909875507946	0.14449548567042897
H1	65094	6885	30,36,66,82	0.0005718843438080601	0.02495121309079126	0.981714084263734	-0.11136582990902595	0.11250959859664207
H1	65094	6885	30,36,66,83	0.08813517328163822	0.024946977608880698	0.0004113462691130707	-0.023783539483688845	0.20005388604696528
H1	65094	6885	30,36,66,84	0.042678774562162514	0.024998649242377338	0.08778218697082758	-0.0694717507617074	0.15482929988603245
H1	65094	6885	30,36,66,85	0.006162403650257858	0.0249928262450067	0.8052442944122948	-0.10596199817358834	0.11828680547410406
H1	65094	6885	30,36,66,92	0.010237359286916603	0.024988455414918547	0.6820396015265789	-0.1018674338418463	0.1223421524156795
H1	65094	6885	30,36,66,95	0.014235924727528326	0.024989331783480034	0.5688968962996179	-0.09787280002144313	0.1263446494764998
H1	65094	6885	30,36,66,103	0.05301402584094733	0.02497714905912937	0.0337998919859058	-0.05904004399757054	0.1650680956794652
H1	65094	6885	30,36,66,113	0.0625896168701563	0.024967861220399762	0.012185413702573145	-0.049422785277337566	0.17460201901765016
H1	65094	6885	30,36,79,82	-0.014178119866328442	0.024937528052151377	0.5696667989095001	-0.12605443943108713	0.09769819969843024
H1	65094	6885	30,36,79,83	-0.03960448300025554	0.024933433167702898	0.11219937528445463	-0.15146243183475655	0.07225346583424548
H1	65094	6885	30,36,79,84	0.0001469253570125506	0.024981060764262517	0.9953073131805927	-0.11192469342110366	0.11221854413512876
H1	65094	6885	30,36,79,85	-0.01380390317414315	0.024974025736021786	0.580450157769123	-0.1258439609624948	0.09823615461420851
H1	65094	6885	30,36,79,92	0.005770988679761446	0.02497171263403028	0.8172371219687276	-0.10625869192376874	0.11780066928329164
H1	65094	6885	30,36,79,95	-0.0782470688177267	0.024974526631498958	0.0017307093882042864	-0.1902893737551284	0.033795236119675
H1	65094	6885	30,36,79,103	0.0020348588283601865	0.024964505541793986	0.9350365896194139	-0.10996248886099848	0.11403220651771885
H1	65094	6885	30,36,79,113	-0.013296637011753765	0.024950118006855215	0.5940848870242688	-0.12522943842959777	0.09863616440609023
H1	65094	6885	30,36,82,83	-0.33204205669100506	0.02491266000186839	1.8182732515963937e-40	-0.4438068116317724	-0.22027730175023774
H1	65094	6885	30,36,82,84	-0.03643660369747043	0.02495058221621578	0.14419907347609676	-0.14837148768078195	0.07549828028584112
H1	65094	6885	30,36,82,85	0.04166566245701997	0.02494457841560048	0.09485958790520793	-0.07024228689528741	0.15357361180932735
H1	65094	6885	30,36,82,92	0.014432267945643229	0.024940415163152093	0.5628141579559143	-0.0974570039595503	0.12632153985083677
H1	65094	6885	30,36,82,95	0.015120196519232243	0.02494195894691005	0.5443741744113244	-0.09677600120654314	0.12701639424500763
H1	65094	6885	30,36,82,103	0.059912238035055965	0.024933426253361125	0.016269265091521056	-0.05194567977988658	0.1717701558499985
H1	65094	6885	30,36,82,113	0.020365742857688274	0.024921675159651248	0.41382322093889035	-0.09143945645554984	0.1321709421709264
H1	65094	6885	30,36,83,84	-0.054016869392350175	0.02494667040842267	0.030369245941922654	-0.16593420397550374	0.0579004651908034
H1	65094	6885	30,36,83,85	-0.023162956936847223	0.024941511822331803	0.35305311019823915	-0.13505714874398878	0.08873123487029433
H1	65094	6885	30,36,83,92	0.010624302740073421	0.024936878924554578	0.6700745813474839	-0.10124910466730118	0.12249771014744802
H1	65094	6885	30,36,83,95	-0.004747969413416708	0.024938107622162795	0.849004099658279	-0.11662688908190948	0.10713095025507606
H1	65094	6885	30,36,83,103	0.08273881624286306	0.02492947253539716	0.0009042316184908501	-0.029101364151855616	0.1945789966375817
H1	65094	6885	30,36,83,113	-0.026021924011995393	0.0249193046400698	0.2963751870750483	-0.13781648854997935	0.08577264052598857
H1	65094	6885	30,36,84,85	-0.05260544741851625	0.02499439513756144	0.0353225981052951	-0.1647368877076205	0.05952599287058799
H1	65094	6885	30,36,84,92	-0.031646636793786875	0.024985794290754294	0.20530872212302526	-0.14373949141858985	0.0804462178310161
H1	65094	6885	30,36,84,95	0.040493073491122605	0.02498810055600451	0.10513156349233975	-0.07161012764707955	0.15259627462932476
H1	65094	6885	30,36,84,103	0.07468612732975355	0.02497802479951832	0.002790270064664683	-0.03737187131082542	0.18674412597033252
H1	65094	6885	30,36,84,113	0.03206135263684157	0.02496402609873572	0.199041362972061	-0.079933844144669	0.14405654941835214
H1	65094	6885	30,36,85,92	-0.009676694423751298	0.02497950280878249	0.6984723349969562	-0.12174132380320751	0.10238793495570492
H1	65094	6885	30,36,85,95	-0.02393385424624106	0.024982715664953956	0.3380584089225205	-0.13601289734477173	0.0881451888522896
H1	65094	6885	30,36,85,103	0.01571033425399815	0.024971976836229183	0.5292739055969409	-0.09632053163018907	0.12774120013818535
H1	65094	6885	30,36,85,113	0.07166725087047529	0.02495797341465993	0.004086538961904633	-0.040300791975951114	0.18363529371690168
H1	65094	6885	30,36,92,95	0.07440060178786867	0.02497959594656424	0.0028982497866590485	-0.037664445432209634	0.186465649007947
H1	65094	6885	30,36,92,103	0.030915209234056107	0.024967591610300904	0.21564189747468793	-0.08109598337151706	0.1429264018396293
H1	65094	6885	30,36,92,113	0.023537042140686748	0.024955540547819482	0.34560350654118077	-0.08842008622425893	0.13549417050563242
H1	65094	6885	30,36,95,103	0.010365366327384773	0.02497179692224894	0.6780827339836346	-0.10166469241529645	0.122395425070066
H1	65094	6885	30,36,95,113	-0.005867850939837993	0.024956380785743488	0.8141131051303756	-0.11782874883343541	0.10609304695375943
H1	65094	6885	30,36,103,113	-0.01185697973154845	0.02494579648191071	0.6345680101277213	-0.12377039365017088	0.10005643418707398
H1	65094	6885	30,57,64,65	0.14040696218056054	0.024961319733953397	1.8637699626124486e-08	0.028423906864339266	0.2523900174967818
H1	65094	6885	30,57,64,66	0.0070114841826522945	0.024961523905435757	0.7787944868470166	-0.10497248710061907	0.11899545546592366
H1	65094	6885	30,57,64,79	-0.10526446394046518	0.02494642384797096	2.4508304511221177e-05	-0.21718069238848658	0.006651764507556238
H1	65094	6885	30,57,64,82	-0.04307532831225802	0.02492407927764782	0.08394664352533829	-0.1548913131320906	0.06874065650757455
H1	65094	6885	30,57,64,83	-0.09801344483248586	0.024920030362068937	8.394783073986365e-05	-0.2098112651505183	0.013784375485546577
H1	65094	6885	30,57,64,84	0.05554458761851322	0.02496581473380463	0.026096756001906782	-0.056458633451055715	0.16754780868808217
H1	65094	6885	30,57,64,85	-0.018894302625114212	0.02496008171910547	0.4490644294785684	-0.13087180388062575	0.09308319863039732
H1	65094	6885	30,57,64,92	-0.0034546042767606977	0.024951197255194082	0.8898817459246126	-0.11539224748693457	0.10848303893341317
H1	65094	6885	30,57,64,95	0.012952789930224196	0.024955316134212452	0.6037353059832523	-0.09900333165616819	0.12490891151661658
H1	65094	6885	30,57,64,103	0.06855220539142015	0.024945488142674613	0.005996377603956947	-0.04335982523617041	0.1804642360190107
H1	65094	6885	30,57,64,113	-0.019024615603344952	0.024933368552861872	0.44545559555327896	-0.13088227455864912	0.09283304335195922
H1	65094	6885	30,57,65,66	-0.4252027841578575	0.02496040654948042	6.484231974486465e-65	-0.5371817426879937	-0.31322382562772133
H1	65094	6885	30,57,65,79	-0.03006498650005973	0.02494825236667418	0.22817195749356603	-0.14198941816462868	0.0818594451645092
H1	65094	6885	30,57,65,82	0.37511837921941293	0.02492672206821857	4.3848647089553173e-51	0.26329053814495007	0.4869462202938758
H1	65094	6885	30,57,65,83	0.2321761812654094	0.0249225842142796	1.2499295098017222e-20	0.12036690369365703	0.34398545883716175
H1	65094	6885	30,57,65,84	0.10484748457860527	0.02496327968205063	2.6723075410767835e-05	-0.007144363581044505	0.21683933273825504
H1	65094	6885	30,57,65,85	-0.03316710405258705	0.024956076273525835	0.18384685116003752	-0.1451266358241654	0.0787924277189913
H1	65094	6885	30,57,65,92	0.06322742984439389	0.024952552715311493	0.011282489514108433	-0.04871629431690454	0.17517115400569233
H1	65094	6885	30,57,65,95	0.08805332951479727	0.02495509014515058	0.00041828859644350234	-0.023901778225136422	0.20000843725473097
H1	65094	6885	30,57,65,103	0.03155854943096148	0.024944978249981584	0.20583110102797633	-0.08035119368369877	0.1434682925456217
H1	65094	6885	30,57,65,113	-0.013994233826315039	0.02493363086930504	0.5746228992597051	-0.12585306960227927	0.0978646019496492
H1	65094	6885	30,57,66,79	0.059046758998603344	0.024948357041841746	0.017947846877187885	-0.05287814226633948	0.17097166026354615
H1	65094	6885	30,57,66,82	0.06518387452649405	0.024924190165572267	0.008917587409972899	-0.046632607765776254	0.17700035681876436
H1	65094	6885	30,57,66,83	0.019318348213640757	0.02492027897932084	0.4382211298501397	-0.09248058746687128	0.13111728389415278
H1	65094	6885	30,57,66,84	0.04602256857880671	0.024963475660014025	0.06524709187769026	-0.06597015878960884	0.15801529594722225
H1	65094	6885	30,57,66,85	0.023581528953536934	0.024957912956815802	0.3447384645421515	-0.08838624266307568	0.13554930057014955
H1	65094	6885	30,57,66,92	0.048264408862756625	0.024952190514326764	0.05308411387930395	-0.063677690369518	0.16020650809503123
H1	65094	6885	30,57,66,95	0.008721001544691465	0.02495371819229702	0.7267249499612756	-0.10322795125335898	0.12066995434274191
H1	65094	6885	30,57,66,103	-0.027335383862709728	0.02494273804566885	0.273115891913347	-0.13923507683073727	0.0845643091053178
H1	65094	6885	30,57,66,113	-0.0063673199952376525	0.024935847233572023	0.7984551924045912	-0.11823609896510974	0.10550145897463444
H1	65094	6885	30,57,79,82	-0.009007676437123857	0.02491145752544738	0.7176614758506701	-0.12076703675192568	0.10275168387767797
H1	65094	6885	30,57,79,83	0.018605507702181057	0.024907545820140344	0.45507697549416426	-0.09313630367224231	0.1303473190766044
H1	65094	6885	30,57,79,84	0.12184069677158682	0.024946335407799423	1.0417116816385125e-06	0.0099248650894707	0.23375652845370293
H1	65094	6885	30,57,79,85	0.07769314897257251	0.024938984333902577	0.0018382889859210624	-0.034189703855717055	0.1895760018008621
H1	65094	6885	30,57,79,92	-0.011300368573243014	0.02493592106465962	0.650423482411318	-0.1231694787688217	0.10056874162233567
H1	65094	6885	30,57,79,95	-0.0037850366910412436	0.02494003979818134	0.8793724489247651	-0.11567262461010216	0.10810255122801968
H1	65094	6885	30,57,79,103	0.03377654514371842	0.02492981096227007	0.17546561597514956	-0.07806515352309619	0.145618243810533
H1	65094	6885	30,57,79,113	0.0347761970233722	0.024918909692192646	0.16284796415386685	-0.07701659567440276	0.14656898972114718
H1	65094	6885	30,57,82,83	0.17060948177071134	0.024897734674373652	7.333600324351334e-12	0.05891168578052315	0.28230727776089953
H1	65094	6885	30,57,82,84	-0.041942069067127496	0.024925525173740293	0.09243941642670947	-0.15376454055769023	0.06988040242343525
H1	65094	6885	30,57,82,85	-0.03015408579021539	0.02491903314852718	0.22625215377957641	-0.14194743234562635	0.08163926076519558
H1	65094	6885	30,57,82,92	0.004520702731697135	0.024914566155766184	0.8560164345826581	-0.10725260371755024	0.11629400918094451
H1	65094	6885	30,57,82,95	-0.010198019840608752	0.024916882651186807	0.6823345747351099	-0.12198171869849446	0.10158567901727696
H1	65094	6885	30,57,82,103	-0.05995625436626645	0.02490904684689354	0.01608694735562033	-0.1717047997420858	0.051792291009552904
H1	65094	6885	30,57,82,113	0.021540597538559636	0.024900487548291352	0.38700541630513696	-0.09016954856915	0.13325074364626927
H1	65094	6885	30,57,83,84	0.030163342367510615	0.02492170195077892	0.22615937776405007	-0.0816419771377832	0.14196866187280444
H1	65094	6885	30,57,83,85	0.07981096976062307	0.024916279036178247	0.001359988927197393	-0.03197002112133773	0.19159196064258388
H1	65094	6885	30,57,83,92	0.055221435484641423	0.02491137959235054	0.026646404858674064	-0.05653757520175984	0.16698044617104268
H1	65094	6885	30,57,83,95	-0.05324256008601613	0.024913121631669123	0.03259163864923142	-0.16500938601966614	0.05852426584763387
H1	65094	6885	30,57,83,103	-0.018460788417186125	0.024905162816614625	0.45854884267511	-0.13019190901009298	0.09327033217572073
H1	65094	6885	30,57,83,113	-0.026943419460972118	0.024898279086430827	0.2791948834781679	-0.1386436578270508	0.08475681890510657
H1	65094	6885	30,57,84,85	-0.06906663278741787	0.024960123553390647	0.0056578905053409345	-0.18104432172255214	0.04291105614771641
H1	65094	6885	30,57,84,92	0.07852176731078098	0.024951367000652497	0.0016504229379652507	-0.0334166374222315	0.19046017204379345
H1	65094	6885	30,57,84,95	-0.027273318841926186	0.024954242992977715	0.2744276851428208	-0.1392246260340665	0.08467798835021412
H1	65094	6885	30,57,84,103	-0.03518641928940003	0.024945063992867667	0.15838080363015192	-0.14709654706923253	0.07672370849043247
H1	65094	6885	30,57,84,113	0.07796012645751438	0.024932960174536195	0.0017681321633415774	-0.033895700405051035	0.18981595332007978
H1	65094	6885	30,57,85,92	0.05786120453354826	0.024944601309047663	0.02036660323605974	-0.05404684752479348	0.16976925659189002
H1	65094	6885	30,57,85,95	-0.017762002469706606	0.024947832842870492	0.47648883997711633	-0.12968455203998663	0.09416054710057342
H1	65094	6885	30,57,85,103	-0.020277679984229136	0.024938145206625805	0.4161531530884627	-0.132156768266523	0.09160140829806472
H1	65094	6885	30,57,85,113	0.07623695271181541	0.02492719534165319	0.002226347213680285	-0.03559301159193874	0.18806691701556955
H1	65094	6885	30,57,92,95	0.043680389977082346	0.024944552227356965	0.07993405985569768	-0.06822744188786646	0.15558822184203114
H1	65094	6885	30,57,92,103	-0.003613787720002204	0.02493366466186536	0.8847618379976947	-0.11547277509829323	0.10824519965828883
H1	65094	6885	30,57,92,113	-0.007030346355827222	0.024924006350121753	0.7778898580647133	-0.11884600400356822	0.10478531129191378
H1	65094	6885	30,57,95,103	-0.03824837394840164	0.02493863637060938	0.1251090336258115	-0.1501296657217019	0.07363291782489863
H1	65094	6885	30,57,95,113	0.04754945876810085	0.024925692903237175	0.056441588089944386	-0.06427376520116605	0.15937268273736777
H1	65094	6885	30,57,103,113	-0.04778560680348587	0.024915169405114183	0.05512449027316506	-0.15956161958820853	0.0639904059812368
H1	65094	6885	30,64,65,66	-0.07439170968275244	0.02501461364553677	0.002941326413973079	-0.18661385552433327	0.03783043615882839
H1	65094	6885	30,64,65,79	-0.08314661589502437	0.024999972452275115	0.0008819805774609314	-0.19530307748703865	0.029009845696989917
H1	65094	6885	30,64,65,82	0.0825083692163211	0.024968003576870592	0.0009518163259604186	-0.029504671579798622	0.19452141001244083
H1	65094	6885	30,64,65,83	-0.08333641556200477	0.024962023981519782	0.0008427635420884568	-0.19532263031831268	0.028649799194303133
H1	65094	6885	30,64,65,84	0.028333197386040898	0.025019821660724622	0.2574583505868642	-0.08391231298350099	0.1405787077555828
H1	65094	6885	30,64,65,85	-0.0697363281684038	0.025012587690358717	0.005304366737727915	-0.18194938504140484	0.04247672870459722
H1	65094	6885	30,64,65,92	-0.07996817605325379	0.02500529153575202	0.001384342272908826	-0.19214850045483	0.03221214834832242
H1	65094	6885	30,64,65,95	0.026094598965408722	0.0250095414101813	0.2967740068123483	-0.08610479149230447	0.13829398942312193
H1	65094	6885	30,64,65,103	0.07279479126244945	0.024998384269162642	0.003592821356310415	-0.03935454532178351	0.1849441278466824
H1	65094	6885	30,64,65,113	-0.040774126481613826	0.024982512256597856	0.10266241287178043	-0.15285225703667982	0.07130400407345215
H1	65094	6885	30,64,66,79	-0.04004099713165998	0.025002872990182626	0.10928141853899276	-0.15221047130074972	0.07212847703742976
H1	65094	6885	30,64,66,82	-0.005270799820859651	0.02496819626112968	0.8328095545247475	-0.11728470504932004	0.10674310540760074
H1	65094	6885	30,64,66,83	-0.07665059673618657	0.024962258823392036	0.002136849784784043	-0.18863786505499244	0.0353366715826193
H1	65094	6885	30,64,66,84	-0.033394576504232026	0.025022063615821714	0.182010811889745	-0.14565014487488642	0.07886099186642238
H1	65094	6885	30,64,66,85	-0.001144286754246715	0.025014698148784605	0.9635139915943547	-0.11336681169965608	0.11107823819116265
H1	65094	6885	30,64,66,92	-0.05130321198401894	0.025006952518362723	0.040217108025853744	-0.16349098799110143	0.06088456402306355
H1	65094	6885	30,64,66,95	0.04204347352377136	0.025011176968657078	0.09277072577396292	-0.07016325448008195	0.15425020152762467
H1	65094	6885	30,64,66,103	0.019989439924976038	0.024998772153136527	0.4239360737132075	-0.09216163680893517	0.13214051665888726
H1	65094	6885	30,64,66,113	-0.008866322483076838	0.02498658340555914	0.7227082501884949	-0.12096271728475283	0.10323007231859915
H1	65094	6885	30,64,79,82	-0.09517422424157429	0.024952510865418952	0.00013675781193303658	-0.20711776065323123	0.016769312170082637
H1	65094	6885	30,64,79,83	-0.06571208596355649	0.024947209809677483	0.008439649662631594	-0.17763184044282126	0.0462076685157083
H1	65094	6885	30,64,79,84	0.05554756336319244	0.025002820064448084	0.026310668476922917	-0.05662167336711113	0.16771680009349602
H1	65094	6885	30,64,79,85	-0.06557053135116109	0.02499559424349685	0.008710946154738462	-0.17770735114534464	0.04656628844302246
H1	65094	6885	30,64,79,92	-0.03638095171708877	0.02498962306704075	0.14544159723703384	-0.14849098324083976	0.07572907980666223
H1	65094	6885	30,64,79,95	-0.013980485873985815	0.024995665571304157	0.5759479514985467	-0.1261176256635012	0.09815665391552957
H1	65094	6885	30,64,79,103	-0.02770263702073894	0.024983655228839663	0.2675079243877054	-0.1397858952503487	0.08438062120887083
H1	65094	6885	30,64,79,113	-0.10511162730851364	0.024967607092945418	2.558441908608569e-05	-0.21712288937330834	0.006899634756281053
H1	65094	6885	30,64,82,83	0.03750291397170957	0.024924845262211476	0.1324221361240516	-0.07431650725664135	0.1493223352000605
H1	65094	6885	30,64,82,84	0.056043471042930726	0.02497088103395908	0.02481344127460404	-0.055982478783630676	0.16806942086949211
H1	65094	6885	30,64,82,85	-0.0090187360823335	0.024964637490899465	0.717906070307051	-0.12101667573013568	0.10297920356546868
H1	65094	6885	30,64,82,92	0.00013048445365426709	0.024956620747754635	0.9958283370757706	-0.11183148997273287	0.1120924588800414
H1	65094	6885	30,64,82,95	-0.026392036247791628	0.024960730711956546	0.29035978592657646	-0.13837244905618243	0.08558837656059917
H1	65094	6885	30,64,82,103	0.08064469230719828	0.024951651743617697	0.00122978966954569	-0.0312949898577594	0.19258437447215598
H1	65094	6885	30,64,82,113	-0.025783675838048303	0.0249381175231573	0.3011842833845096	-0.13766263992501043	0.08609528824891383
H1	65094	6885	30,64,83,84	0.06567885826843031	0.024966466097103127	0.008523591299029912	-0.046327284988469414	0.17768500152533004
H1	65094	6885	30,64,83,85	0.03559036668132509	0.024960896383189542	0.1539184812938421	-0.07639078937185592	0.1475715227345061
H1	65094	6885	30,64,83,92	0.00184723268809317	0.02495205422277659	0.9409857445028234	-0.1100942551043872	0.11378872048057354
H1	65094	6885	30,64,83,95	0.01640619059108983	0.02495623640962304	0.5109273614363221	-0.09555405959320157	0.12836644077538123
H1	65094	6885	30,64,83,103	0.05125797572226021	0.024946450201201432	0.03991048918305187	-0.06065837095329474	0.16317432239781515
H1	65094	6885	30,64,83,113	-0.02540237556398811	0.024934198713259813	0.30831332157351365	-0.13726375883750763	0.0864590077095314
H1	65094	6885	30,64,84,85	-0.11216612575959212	0.025020696329639998	7.376406694392369e-06	-0.2244155601242824	8.330860509817017e-05
H1	65094	6885	30,64,84,92	-0.07076906121415494	0.025009047683866647	0.004660202641736129	-0.18296623668556958	0.0414281142572597
H1	65094	6885	30,64,84,95	0.07614874198523403	0.025013426797113558	0.0023331517206753747	-0.036068079341695924	0.18836556331216397
H1	65094	6885	30,64,84,103	0.035142212996490674	0.025002947105590593	0.15987120251093478	-0.07702759367384174	0.14731201966682309
H1	65094	6885	30,64,84,113	0.02814919151509948	0.024986228728461984	0.2599212568775368	-0.08394561211169418	0.14024399514189315
H1	65094	6885	30,64,85,92	0.0011337376943399424	0.025001715389865675	0.9638313621059933	-0.11103054317480779	0.11329801856348767
H1	65094	6885	30,64,85,95	-0.006479418647442947	0.02500745228186276	0.7955593786420658	-0.11866943672522787	0.10571059943034197
H1	65094	6885	30,64,85,103	0.0515089473140955	0.024995187036140665	0.039330887890511326	-0.06062604564062689	0.1636439402688179
H1	65094	6885	30,64,85,113	-0.023587071428837758	0.024980123791326615	0.34505422404287567	-0.13565448669955815	0.08848034384188264
H1	65094	6885	30,64,92,95	-0.013883834920466909	0.02500059193195165	0.5786640885887935	-0.12604307566148548	0.09827540582055166
H1	65094	6885	30,64,92,103	0.09637739561679304	0.024987732202787084	0.00011491607409107638	-0.015724152991848886	0.20847894422543495
H1	65094	6885	30,64,92,113	-0.006866805386507191	0.024974084727094142	0.7833500666207931	-0.11890712782434812	0.10517351705133374
H1	65094	6885	30,64,95,103	-0.0009655542593782762	0.024994684143863695	0.9691852095066764	-0.11309829110688076	0.1111671825881242
H1	65094	6885	30,64,95,113	-0.011028543509336464	0.02497709990258744	0.6588192640652022	-0.12308239281865906	0.10102530579998613
H1	65094	6885	30,64,103,113	0.03979374265625546	0.024965412950082335	0.11095156303004466	-0.07220767590570255	0.15179516121821346
H1	65094	6885	30,65,66,79	-0.04324162236522877	0.02499988203085875	0.08369400645407736	-0.1553976783029516	0.06891443357249405
H1	65094	6885	30,65,66,82	-0.28172332389804433	0.024966284180239953	1.686512913549217e-29	-0.39372865102797766	-0.169717996768111
H1	65094	6885	30,65,66,83	-0.3571568057632615	0.02496071709113361	2.313012143524785e-46	-0.4691371574650528	-0.24517645406147018
H1	65094	6885	30,65,66,84	0.06981941095941024	0.025016150861285887	0.005256690249551252	-0.04240963123693471	0.18204845315575519
H1	65094	6885	30,65,66,85	0.03451467886750781	0.025007390021272773	0.16753678564688132	-0.07767505989287056	0.14670441762788616
H1	65094	6885	30,65,66,92	-0.0024902743315466935	0.025004618237804466	0.9206681313297147	-0.1146675781411787	0.10968702947808531
H1	65094	6885	30,65,66,95	0.00504177250232124	0.02500650909642361	0.8402157594057447	-0.10714401419714188	0.11722755920178436
H1	65094	6885	30,65,66,103	0.1044627593995453	0.024995371240132416	2.9285451431212875e-05	-0.007673059942804719	0.2165985787418953
H1	65094	6885	30,65,66,113	-0.11387694316566832	0.024982647323321068	5.1688445773840945e-06	-0.22595567966563218	-0.0017982066657044743
H1	65094	6885	30,65,79,82	-0.018981419177833136	0.024954262645488227	0.4468702024217469	-0.1309328145363122	0.09296997618064592
H1	65094	6885	30,65,79,83	-0.020697968758238594	0.024948736382786937	0.4067571111259204	-0.13262457184658266	0.09122863433010546
H1	65094	6885	30,65,79,84	0.07679454973633604	0.024999372270941393	0.002128282373047673	-0.03535921928412311	0.18894831875679519
H1	65094	6885	30,65,79,85	-0.04704669590471988	0.024990223142338532	0.05975902704977713	-0.15915941952432083	0.06506602771488108
H1	65094	6885	30,65,79,92	-0.03448825445773329	0.024989453898834623	0.16755734953238965	-0.1465975270483515	0.07762101813288491
H1	65094	6885	30,65,79,95	0.0026472190567847775	0.024993336961838388	0.9156485776775286	-0.10947947397729482	0.11477391209086438
H1	65094	6885	30,65,79,103	-0.008371771812619055	0.024981069340565	0.7375322758580164	-0.12044342906628727	0.10369988544104916
H1	65094	6885	30,65,79,113	0.01660555558530341	0.02496689928746414	0.5059873544184195	-0.09540253107766125	0.12861364224826807
H1	65094	6885	30,65,82,83	0.19201518312393473	0.024927216605047625	1.3496500829464437e-14	0.08018512342699222	0.3038452428208772
H1	65094	6885	30,65,82,84	-0.008943647467724025	0.02496895432192351	0.7202018981874254	-0.12096095355658416	0.10307365862113611
H1	65094	6885	30,65,82,85	0.08375197216858377	0.02496106601076787	0.0007932836487936789	-0.02822994487859473	0.19573388921576226
H1	65094	6885	30,65,82,92	0.016478300146075486	0.02495798440144125	0.5091013977219658	-0.09548979198994592	0.1284463922820969
H1	65094	6885	30,65,82,95	0.06935298119247646	0.024961186054262393	0.005463928471929199	-0.042629474401438786	0.1813354367863917
H1	65094	6885	30,65,82,103	0.025217600976712384	0.024951160162628643	0.3121745346635376	-0.08671987582644247	0.13715507777986724
H1	65094	6885	30,65,82,113	-0.1016792196232017	0.024938167456181225	4.563138294089808e-05	-0.21355840772286186	0.01019996847645846
H1	65094	6885	30,65,83,84	0.07950629175512014	0.02496357739981783	0.0014488445055484953	-0.03248689204485426	0.19149947555509456
H1	65094	6885	30,65,83,85	0.043134910154976835	0.024956529974712455	0.08392152463253888	-0.06882665703963281	0.15509647734958648
H1	65094	6885	30,65,83,92	0.05078682867205475	0.024953076541532157	0.04182589378627959	-0.06115924551164914	0.16273290285575864
H1	65094	6885	30,65,83,95	0.09679112210460006	0.024955649199630954	0.00010520698083171722	-0.015166493700991532	0.20874873791019166
H1	65094	6885	30,65,83,103	0.03073479607289603	0.024945535817665964	0.2179256713597514	-0.08117744843726366	0.14264704058305572
H1	65094	6885	30,65,83,113	-0.07536977091334374	0.02493406031682531	0.0025058673341358966	-0.18723053330400347	0.03649099147731598
H1	65094	6885	30,65,84,85	-0.007447946395761962	0.025011175147878314	0.7658685217129901	-0.11965466623112213	0.1047587734395982
H1	65094	6885	30,65,84,92	0.04622518933862607	0.02500482216801418	0.06451329233544115	-0.06595302935564337	0.15840340803289552
H1	65094	6885	30,65,84,95	0.08272717564815452	0.02500801912501848	0.0009401305078303334	-0.02946538543733751	0.19491973673364654
H1	65094	6885	30,65,84,103	-0.006140911499490587	0.024997637296581235	0.8059465551084003	-0.11828689696796545	0.10600507396898427
H1	65094	6885	30,65,84,113	0.04570073523779994	0.024981364121404007	0.06734585270163063	-0.06637224448035943	0.15777371495595932
H1	65094	6885	30,65,85,92	0.053818302919673155	0.02499631352518998	0.031318875749336755	-0.05832174376164971	0.16595834960099604
H1	65094	6885	30,65,85,95	0.02248264944027195	0.025000179263553506	0.3684968583282564	-0.08967473996161275	0.13464003884215664
H1	65094	6885	30,65,85,103	-0.012956371789584142	0.024988542977837123	0.6041166717193389	-0.12506155774866445	0.09914881416949618
H1	65094	6885	30,65,85,113	0.03701144758916941	0.024974554284455965	0.1383546779087465	-0.07503098140668141	0.14905387658502023
H1	65094	6885	30,65,92,95	0.03213492968395554	0.024999291296745888	0.1986459108980342	-0.0800184760649334	0.14428833543284447
H1	65094	6885	30,65,92,103	0.0033520973260556808	0.0249861988217518	0.8932781365149742	-0.10874257213135845	0.11544676678346981
H1	65094	6885	30,65,92,113	0.0044205729346495914	0.02497231811937769	0.859494139410611	-0.10761182403563824	0.11645296990493742
H1	65094	6885	30,65,95,103	0.03197633025162616	0.02499141225917687	0.20072869880093752	-0.08014172805933345	0.14409438856258577
H1	65094	6885	30,65,95,113	0.06930640212816919	0.024974947029984408	0.005521302927617962	-0.0427377888275742	0.18135059308391258
H1	65094	6885	30,65,103,113	0.04325900888460328	0.02496209817747169	0.08310315282173492	-0.06872753873428862	0.1552455565034952
H1	65094	6885	30,66,79,82	0.017376331384081123	0.024954119993551217	0.4862242423207206	-0.09457442400023298	0.12932708676839522
H1	65094	6885	30,66,79,83	0.04424426115402369	0.02494884403595361	0.07616780192704428	-0.06768282489478267	0.15617134720283005
H1	65094	6885	30,66,79,84	0.010052632757470592	0.025001867790219717	0.6876301080643417	-0.10211233181980871	0.12221759733474989
H1	65094	6885	30,66,79,85	-0.026668803500097593	0.024993829081664844	0.28596925380965466	-0.13879770431334654	0.08546009731315135
H1	65094	6885	30,66,79,92	-0.015485889170207351	0.024991018783704407	0.535485280828336	-0.12760218224655323	0.09663040390613854
H1	65094	6885	30,66,79,95	0.030540219179784	0.024994354828080403	0.22175618902670344	-0.08159104027037051	0.1426714786299385
H1	65094	6885	30,66,79,103	0.030115575062867883	0.024981899663869267	0.22801685985523237	-0.08195980723985635	0.14219095736559212
H1	65094	6885	30,66,79,113	0.040662343447170235	0.02497063461212591	0.10344413445597218	-0.07136250086613831	0.1526871877604788
H1	65094	6885	30,66,82,83	0.12066320555983939	0.0249246603886526	1.2944160636004428e-06	0.008844613722970587	0.2324817973967082
H1	65094	6885	30,66,82,84	0.03261174251550747	0.02496919633394649	0.19153086114545032	-0.07940664930303545	0.1446301343340504
H1	65094	6885	30,66,82,85	0.06015081656041632	0.02496283248335475	0.015972443598922564	-0.0518390253480884	0.17214065846892104
H1	65094	6885	30,66,82,92	0.0051677409076107406	0.02495736323599897	0.8359615570062082	-0.10679756451661718	0.11713304633183866
H1	65094	6885	30,66,82,95	0.004240023913391233	0.024959424728481054	0.8651077208471072	-0.10773452990912315	0.11621457773590561
H1	65094	6885	30,66,82,103	-0.0020150666816493856	0.024948986928765186	0.9356271522927613	-0.11394279378524746	0.1099126604219487
H1	65094	6885	30,66,82,113	0.004150407793094876	0.024940155151192484	0.8678312046808725	-0.10773769762995884	0.1160385132161486
H1	65094	6885	30,66,83,84	0.021000137031531807	0.024963781737690253	0.4002258080147387	-0.09099396348196236	0.13299423754502598
H1	65094	6885	30,66,83,85	0.0469940155690875	0.024958405598833257	0.059719807041024385	-0.06497596616938084	0.15896399730755584
H1	65094	6885	30,66,83,92	0.026974327001507037	0.02495272490698451	0.2796939024016913	-0.08497016965699307	0.13891882366000713
H1	65094	6885	30,66,83,95	0.00743000280912165	0.024954252321454005	0.7658988898599894	-0.10452134623302048	0.11938135185126378
H1	65094	6885	30,66,83,103	-0.07793494744446883	0.024943284106567706	0.0017820331747601277	-0.18983709018552497	0.0339671952965873
H1	65094	6885	30,66,83,113	0.05766810934728461	0.024936268912197402	0.02074702161210925	-0.054202561383974085	0.1695387800785433
H1	65094	6885	30,66,84,85	0.005539612786926829	0.025016312014371864	0.8247506063090886	-0.10669015238461069	0.11776937795846434
H1	65094	6885	30,66,84,92	0.07590330303166648	0.025006468929245795	0.0024036541742053063	-0.03628230346725665	0.1880889095305896
H1	65094	6885	30,66,84,95	-0.019212746255701574	0.02500942892415338	0.4423595442254167	-0.1314116320714639	0.09298613956006076
H1	65094	6885	30,66,84,103	-0.0330818332977334	0.024998224415221707	0.18571845141389112	-0.14523045273508067	0.07906678613961386
H1	65094	6885	30,66,84,113	0.057930964580397815	0.024985991897080003	0.020423561950852594	-0.0541627765584332	0.17002470571922884
H1	65094	6885	30,66,85,92	0.013969257816094927	0.02500035629403491	0.5763260707271478	-0.09818892579116044	0.1261274414233503
H1	65094	6885	30,66,85,95	-0.019423731772557185	0.025003007115239947	0.4372469920661013	-0.1315938076619836	0.0927463441168692
H1	65094	6885	30,66,85,103	-0.026148777528541722	0.024991284819683986	0.2954195727360559	-0.13826626411236778	0.08596870905528434
H1	65094	6885	30,66,85,113	0.04156647941960978	0.024979292899493487	0.09611032397348795	-0.07049720825148437	0.15363016709070393
H1	65094	6885	30,66,92,95	-0.01616881353333821	0.0250001047636268	0.5177964167463924	-0.1283258687089279	0.09598824164225148
H1	65094	6885	30,66,92,103	-0.04377142193860273	0.02498517522126003	0.07979700361872996	-0.1558614992545871	0.06831865537738165
H1	65094	6885	30,66,92,113	0.02193986754999233	0.0249768419528009	0.3797257582937783	-0.09011282452864203	0.1339925596286267
H1	65094	6885	30,66,95,103	0.002553875840343056	0.024991182113162626	0.9186053614301648	-0.10956314997497456	0.11467090165566067
H1	65094	6885	30,66,95,113	-0.015102499947372616	0.024977373072336537	0.5454157612287662	-0.12715757476814452	0.09695257487339928
H1	65094	6885	30,66,103,113	0.005543182734977448	0.024964566705219727	0.8242819540874617	-0.10645443934961998	0.11754080481957488
H1	65094	6885	30,79,82,83	0.016477183525795636	0.024912108607341072	0.5083503399813052	-0.0952850977138809	0.12823946476547216
H1	65094	6885	30,79,82,84	0.030875055055953782	0.02495197185510238	0.21595126799810976	-0.08106606321344385	0.1428161733253514
H1	65094	6885	30,79,82,85	0.020180183640963134	0.024944063130730817	0.4185083859832591	-0.09172545400768924	0.1320858212896155
H1	65094	6885	30,79,82,92	-0.040449897756978714	0.02494098687568869	0.10484639700130638	-0.15234173451520458	0.07144193900124715
H1	65094	6885	30,79,82,95	0.03243399856679796	0.024945963952472328	0.19354779505791211	-0.07948016666887683	0.14434816380247276
H1	65094	6885	30,79,82,103	0.009148441749896596	0.02493576663110984	0.7137096341301767	-0.10271997561609887	0.12101685911589206
H1	65094	6885	30,79,82,113	-0.0062044338251106	0.02492321360407743	0.8034065500859336	-0.11801653500528181	0.10560766735506061
H1	65094	6885	30,79,83,84	0.10453952486491414	0.024946859164107892	2.7876465251322567e-05	-0.007378656525962937	0.2164577062557912
H1	65094	6885	30,79,83,85	0.061269691988772745	0.02493967524174525	0.014024256824662752	-0.05061626043408911	0.1731556444116346
H1	65094	6885	30,79,83,92	-0.010125674602482926	0.024936588452229878	0.6847022621141969	-0.12199777887449643	0.10174642966953058
H1	65094	6885	30,79,83,95	0.039256498531480055	0.02494075462230451	0.11549519475998495	-0.07263429627688717	0.15114729333984728
H1	65094	6885	30,79,83,103	0.023594989519016396	0.024930485295964373	0.3439326187214925	-0.08824973438637516	0.13543971342440797
H1	65094	6885	30,79,83,113	0.0059702685320005	0.024919538331397758	0.8106552977324736	-0.10582534440683665	0.11776588147083765
H1	65094	6885	30,79,84,85	-0.05681845985173953	0.024993439352353326	0.023009627928895684	-0.1689456122366395	0.05530869253316047
H1	65094	6885	30,79,84,92	-0.016567732003237523	0.024987409293610194	0.5073055076650805	-0.12866783195625534	0.09553236794978029
H1	65094	6885	30,79,84,95	-0.07264229000538602	0.02499185890547972	0.0036547332248113846	-0.18476235208931005	0.039477772078538004
H1	65094	6885	30,79,84,103	0.0388815314939845	0.024980944955984633	0.11960713365165947	-0.07318956773769239	0.1509526307256614
H1	65094	6885	30,79,84,113	0.03561128302882813	0.024965388168000986	0.15375072747156274	-0.07639002435418518	0.14761259041184144
H1	65094	6885	30,79,85,92	0.055025989105862094	0.02497863943155811	0.027604165336327823	-0.057034766935945835	0.16708674514767002
H1	65094	6885	30,79,85,95	0.04047377220977398	0.02498399989682513	0.10524033906989672	-0.0716110322912066	0.15255857671075457
H1	65094	6885	30,79,85,103	0.09132749722582029	0.024973183573596975	0.00025538659227381677	-0.020708782400062076	0.20336377685170265
H1	65094	6885	30,79,85,113	0.010368625710808987	0.024958098100016656	0.6778203805343117	-0.1015999765069707	0.12233722792858867
H1	65094	6885	30,79,92,95	0.01826238101483202	0.024983361433333837	0.46479324868801464	-0.09381955917075079	0.13034432120041484
H1	65094	6885	30,79,92,103	0.018259808119816423	0.024970944093726195	0.46463417123353457	-0.09376642460947066	0.1302860408491035
H1	65094	6885	30,79,92,113	-0.008213114637999896	0.02495611742897606	0.7420795804067377	-0.12017283104376858	0.10374660176776879
H1	65094	6885	30,79,95,103	-0.022042109225552053	0.024977327904155428	0.3775184051374213	-0.1340969814099659	0.09001276295886178
H1	65094	6885	30,79,95,113	0.04805825508952333	0.024960350750293844	0.05418622642041906	-0.06392045311076398	0.16003696328981065
H1	65094	6885	30,79,103,113	0.021470211882429924	0.024948116386341375	0.38946495792835145	-0.09045360973854785	0.1333940335034077
H1	65094	6885	30,82,83,84	0.05063988687858678	0.02492605559407654	0.04219824314053101	-0.06118496421732088	0.16246473797449446
H1	65094	6885	30,82,83,85	0.10516806419568636	0.02491974115869216	2.443779466893548e-05	-0.006628458679819621	0.21696458707119234
H1	65094	6885	30,82,83,92	0.03586957152813042	0.02491524940277749	0.149968043784684	-0.0759068001471818	0.14764594320344265
H1	65094	6885	30,82,83,95	-0.001193080638345334	0.024917574048697426	0.9618111733224054	-0.11297988128758271	0.11059372001089204
H1	65094	6885	30,82,83,103	-0.0006515806128628565	0.02490974241330258	0.9791316751276888	-0.11240324648281032	0.1111000852570846
H1	65094	6885	30,82,83,113	-0.18919385767982	0.02490111496566929	3.056810609863001e-14	-0.3009068185471533	-0.07748089681248674
H1	65094	6885	30,82,84,85	0.038665061632596975	0.024964409524238597	0.12143346835016841	-0.07333185529671651	0.15066197856191046
H1	65094	6885	30,82,84,92	0.10531160601935885	0.024956232446506584	2.4483263356852916e-05	-0.0066486263853482025	0.2172718384240659
H1	65094	6885	30,82,84,95	-0.011328743073893588	0.024959158674698417	0.6499088128938387	-0.1233021033090586	0.10064461716127142
H1	65094	6885	30,82,84,103	-0.05414582505541888	0.024950261232040964	0.029999467259806765	-0.16607926901917267	0.05778761890833491
H1	65094	6885	30,82,84,113	-0.004240786198298485	0.02493708306233647	0.8649639877913181	-0.11611510942153401	0.10763353702493704
H1	65094	6885	30,82,85,92	0.026852900549504843	0.024949213641845203	0.28179646023245486	-0.08507584364868803	0.13878164474769772
H1	65094	6885	30,82,85,95	0.007886107487000138	0.024952237777412963	0.7519671280232462	-0.1040562037799286	0.11982841875392887
H1	65094	6885	30,82,85,103	-0.0031551914834836436	0.024942864549655726	0.8993391526440168	-0.11505545198171835	0.10874506901475106
H1	65094	6885	30,82,85,113	-0.010670833529031837	0.024930584072639924	0.6686368308136412	-0.12251600057260839	0.10117433351454472
H1	65094	6885	30,82,92,95	0.06552485964519039	0.024949847421982415	0.008635069749106654	-0.04640672785764023	0.177456447148021
H1	65094	6885	30,82,92,103	-0.04480928090695668	0.024938781153428284	0.0723771507940352	-0.15669122221411938	0.06707266040020601
H1	65094	6885	30,82,92,113	-0.04148548458098156	0.024927813881296633	0.09607290840163901	-0.15331822381650395	0.07034725465454084
H1	65094	6885	30,82,95,103	-0.013309181144527171	0.02494429291739773	0.5936506835876998	-0.12521584967669475	0.09859748738764042
H1	65094	6885	30,82,95,113	0.03905048228765562	0.024929875929639547	0.11725739245970286	-0.07279150783989133	0.15089247241520257
H1	65094	6885	30,82,103,113	-0.006975652424400625	0.02491971503453765	0.7795360043981119	-0.11877205810006819	0.10482075325126694
H1	65094	6885	30,83,84,85	-0.012360871152379937	0.0249605999265715	0.6204500162336772	-0.12434069722308362	0.09961895491832375
H1	65094	6885	30,83,84,92	0.08124192250761286	0.02495194570059416	0.0011308406335695635	-0.030699078425771603	0.19318292344099733
H1	65094	6885	30,83,84,95	-0.01889854992297768	0.024954773418827077	0.44886601553681504	-0.13085223674519617	0.0930551368992408
H1	65094	6885	30,83,84,103	-0.016648575704647284	0.024945603834360175	0.5045223911398207	-0.1285611253556133	0.09526397394631872
H1	65094	6885	30,83,84,113	0.05091145733662028	0.024933396894431983	0.04116613193314058	-0.060946328766432786	0.16276924343967336
H1	65094	6885	30,83,85,92	0.026397398387813853	0.02494519184385081	0.2899614200448214	-0.0855133029652059	0.1383080997408336
H1	65094	6885	30,83,85,95	-0.0326291106658847	0.02494846976442676	0.19092589605001928	-0.14455451763403582	0.07929629630226642
H1	65094	6885	30,83,85,103	-0.012142180514093492	0.024938826874662236	0.6263462154941509	-0.124024326938755	0.09973996591056801
H1	65094	6885	30,83,85,113	0.043790563862597276	0.024927763437154752	0.07897447623930455	-0.06804194906721729	0.15562307679241183
H1	65094	6885	30,83,92,95	0.05790165679023196	0.02494532634659194	0.020282590960553636	-0.05400964797751348	0.1698129615579774
H1	65094	6885	30,83,92,103	-0.0019421520394185543	0.024934436781487535	0.9379155424011117	-0.1138046033497165	0.10992029927087939
H1	65094	6885	30,83,92,113	-0.012523585683735461	0.02492472107411902	0.6153484134755496	-0.1243424497715916	0.09929527840412068
H1	65094	6885	30,83,95,103	-0.019396572584505334	0.024939478667599657	0.4367220991847297	-0.131281643123971	0.09248849795496035
H1	65094	6885	30,83,95,113	0.0295696230114747	0.024926333884342452	0.23551639972873165	-0.08225647656786947	0.14139572259081887
H1	65094	6885	30,83,103,113	-0.008040169499664351	0.02491581508744044	0.7469285974406346	-0.11981907898537995	0.10373873998605125
H1	65094	6885	30,84,85,92	0.05204531358764641	0.025000564171073825	0.037368246814164126	-0.060113802610761824	0.16420442978605465
H1	65094	6885	30,84,85,95	0.007670431212692619	0.025004777435161545	0.7590281984763442	-0.10450758679821695	0.11984844922360219
H1	65094	6885	30,84,85,103	-0.03162465872760922	0.024994849466560252	0.20578785788131804	-0.14375813725627562	0.08050881980105719
H1	65094	6885	30,84,85,113	-0.002554797519014995	0.024978033467411658	0.9185333757510522	-0.11461283504604666	0.10950324000801667
H1	65094	6885	30,84,92,95	0.001835404578531874	0.02499778707666044	0.9414700207365827	-0.11031125284283144	0.11398206199989519
H1	65094	6885	30,84,92,103	-0.015033348160714999	0.02498652379916947	0.5474039900615905	-0.12712947555242615	0.09706277923099617
H1	65094	6885	30,84,92,113	0.048742282673193804	0.024971936321089797	0.050956958303539725	-0.06328840144940616	0.16077296679579378
H1	65094	6885	30,84,95,103	-0.059689983902618815	0.024992703151683757	0.016929850163887983	-0.17181383349739462	0.052433865692156995
H1	65094	6885	30,84,95,113	-0.005930647159360536	0.024974779851681384	0.8122965608655166	-0.1179740881092006	0.10611279379047953
H1	65094	6885	30,84,103,113	0.0021084758567686546	0.02496287336905093	0.9326874415580022	-0.10988154947573871	0.11409850118927602
H1	65094	6885	30,85,92,95	-0.0029880178449630534	0.02499096472514881	0.9048290105679003	-0.11510406840038913	0.10912803271046302
H1	65094	6885	30,85,92,103	-0.007731953776150102	0.02497832471979923	0.7569069300969978	-0.11979129793811037	0.10432739038581017
H1	65094	6885	30,85,92,113	0.04149172282573138	0.02496504905187858	0.09651967480927878	-0.07050806319303121	0.15349150884449397
H1	65094	6885	30,85,95,103	-0.004040841355901992	0.02498556706897367	0.871521385490913	-0.11613267660394525	0.10805099389214126
H1	65094	6885	30,85,95,113	0.028974616396051145	0.024968341599363928	0.24586869784978843	-0.08303994085801121	0.1409891736501135
H1	65094	6885	30,85,103,113	-0.0158172633994198	0.024956052954336068	0.526210782738554	-0.1277766905549704	0.0961421637561308
H1	65094	6885	30,92,95,103	0.042054655233472626	0.02498152249094199	0.09229715837150104	-0.07001903497214981	0.15412834543909507
H1	65094	6885	30,92,95,113	0.05916113920613131	0.024966853728844034	0.017811193299657135	-0.0528467430688631	0.17116902148112573
H1	65094	6885	30,92,103,113	0.008467374293365193	0.02495353754824092	0.734365677815269	-0.10348076808786666	0.12041551667459705
H1	65094	6885	30,95,103,113	-0.019639207755057786	0.024958481992160702	0.4313581947986692	-0.1316095322141156	0.09233111670400002
H1	65094	6885	35,36,57,64	-0.05181040763984357	0.024906031458585873	0.03750831296783866	-0.16354542518943993	0.059924609909752805
H1	65094	6885	35,36,57,65	0.02711280863796106	0.024901266207087512	0.2762411087114483	-0.08460083073821242	0.13882644801413455
H1	65094	6885	35,36,57,66	-0.047032304021766835	0.024900723269900654	0.058924580007427146	-0.15874350763870654	0.06467889959517287
H1	65094	6885	35,36,57,79	0.04068781206715055	0.024892072939059855	0.10214482741824142	-0.07098458388707847	0.15236020802137956
H1	65094	6885	35,36,57,82	0.008357947971561086	0.024882337902309107	0.7369483766765391	-0.10327077404352594	0.11998666998664811
H1	65094	6885	35,36,57,83	-0.013798109711466555	0.024881974296363737	0.5792098280554756	-0.12542520049450626	0.09782898107157315
H1	65094	6885	35,36,57,84	-0.023747552841337116	0.024903666469286417	0.3403019804711127	-0.13547196042598109	0.08797685474330684
H1	65094	6885	35,36,57,85	0.047472379822894095	0.024902334296619262	0.05661069489488114	-0.06424605128426121	0.1591908109300494
H1	65094	6885	35,36,57,92	0.013201976132724447	0.024895291352953514	0.5959058825258452	-0.09848485847398471	0.1248888107394336
H1	65094	6885	35,36,57,95	0.03419660518662948	0.024897440761807745	0.16960262179715518	-0.07749987223436938	0.14589308260762834
H1	65094	6885	35,36,57,103	0.038837916184634835	0.024889455787362458	0.11866693707667951	-0.07282273853770323	0.15049857090697288
H1	65094	6885	35,36,57,113	-0.0015626626760884	0.024882479186782748	0.949924605922554	-0.11319201853053952	0.11006669317836272
H1	65094	6885	35,36,64,65	-0.10276010248403278	0.024940106593325115	3.7894292425458665e-05	-0.214647990063703	0.009127785095637428
H1	65094	6885	35,36,64,66	-0.03686520636224122	0.024941074240849983	0.13938852244363395	-0.14875743506359324	0.07502702233911081
H1	65094	6885	35,36,64,79	-0.01605175169397366	0.02493340677497185	0.519717439709644	-0.12790958212373116	0.09580607873578384
H1	65094	6885	35,36,64,82	-0.02979116174747834	0.024909244534930573	0.2317060481647698	-0.14154059400390426	0.08195827050894758
H1	65094	6885	35,36,64,83	-0.07252198330202386	0.02490702363350494	0.003595947433792652	-0.1842614520096531	0.03921748540560539
H1	65094	6885	35,36,64,84	-0.009959962569606018	0.02494884868496905	0.6897360217181057	-0.12188706947512022	0.10196714433590819
H1	65094	6885	35,36,64,85	-0.027840749426919054	0.024946597162047276	0.26442078783995354	-0.13975775540753899	0.08407625655370088
H1	65094	6885	35,36,64,92	0.01143239989639211	0.024936343873458562	0.6466212949363541	-0.10043860713082949	0.1233034069236137
H1	65094	6885	35,36,64,95	0.0037696392930020584	0.02494038536699752	0.8798610764445249	-0.10811949893879354	0.11565877752479765
H1	65094	6885	35,36,64,103	0.02944023942591034	0.024931303932329105	0.2376654022757715	-0.08240815709784806	0.14128863594966873
H1	65094	6885	35,36,64,113	0.0048126979309913165	0.024918370261023996	0.846851135377978	-0.10697767473647107	0.1166030705984537
H1	65094	6885	35,36,65,66	0.00015821653540415426	0.024933649982280537	0.9949370773401773	-0.11170070498640267	0.11201713805721097
H1	65094	6885	35,36,65,79	0.008497294659715049	0.024925134592191662	0.7331705423766677	-0.10332342457913857	0.12031801389856867
H1	65094	6885	35,36,65,82	-0.02290140308449984	0.02490413218771827	0.35779480805943165	-0.13462790000470265	0.08882509383570297
H1	65094	6885	35,36,65,83	-0.009524101897174717	0.02490185768153651	0.7021174973832649	-0.121240394783525	0.10219219098917556
H1	65094	6885	35,36,65,84	-0.020753797113253536	0.02493709297254155	0.4052734904477495	-0.13262816479627945	0.09112057056977238
H1	65094	6885	35,36,65,85	0.01948290029068045	0.024933723221699483	0.4345777838206144	-0.09237634980245155	0.13134215038381244
H1	65094	6885	35,36,65,92	0.028201590054254932	0.02492896231222015	0.25794270400024916	-0.08363630134489526	0.1400394814534051
H1	65094	6885	35,36,65,95	0.03720611082560199	0.024931571125106855	0.13561829321496174	-0.07464348439533788	0.14905570604654186
H1	65094	6885	35,36,65,103	0.0029728707301392987	0.024921241139996445	0.9050455128097558	-0.1088303814566035	0.11477612291688209
H1	65094	6885	35,36,65,113	-0.0527313296113503	0.02491167451917234	0.03428686129235312	-0.16449166341715998	0.059029004194459375
H1	65094	6885	35,36,66,79	0.01729373794893818	0.024927105707169668	0.4878277224616101	-0.09453582423091253	0.1291233001287889
H1	65094	6885	35,36,66,82	-0.011321699580963962	0.024903500022112113	0.6493823049859843	-0.12304536043974061	0.10040196127781269
H1	65094	6885	35,36,66,83	-0.04058025669081655	0.02490130838561233	0.10318226475979644	-0.1522940852909625	0.07113357190932938
H1	65094	6885	35,36,66,84	-0.004181670581698382	0.02493873272306066	0.8668373840815113	-0.11606339461747503	0.10770005345407827
H1	65094	6885	35,36,66,85	0.024794724683879554	0.024936736038490667	0.3200784700072861	-0.08707804169897512	0.13666749106673423
H1	65094	6885	35,36,66,92	0.00832293791163119	0.02493059922001323	0.7384982715160838	-0.10352229708705195	0.12016817291031433
H1	65094	6885	35,36,66,95	0.03912237783761818	0.024932548253289166	0.11662338176136626	-0.07273160103773008	0.15097635671296644
H1	65094	6885	35,36,66,103	0.023073508961284794	0.024921268793761883	0.3545246019069378	-0.08872986728753395	0.13487688521010355
H1	65094	6885	35,36,66,113	-0.05515034837578692	0.02491434193278979	0.026860277149637252	-0.16692264890170025	0.056621952150126414
H1	65094	6885	35,36,79,82	0.000910829086272269	0.02489496072137832	0.9708145255663727	-0.11077452222009984	0.11259618039264438
H1	65094	6885	35,36,79,83	0.02587714243858913	0.024892824861389575	0.2985569507738317	-0.08579862683727273	0.137552911714451
H1	65094	6885	35,36,79,84	-0.040717577656575354	0.024928723507185332	0.10239873137933968	-0.15255439771343637	0.07111924240028568
H1	65094	6885	35,36,79,85	-0.018606749929150124	0.02492470693543226	0.4553573942846463	-0.13042555058713323	0.09321205072883298
H1	65094	6885	35,36,79,92	-0.002851572729008822	0.024920106394831165	0.9088984430638931	-0.11464973415004019	0.10894658869202255
H1	65094	6885	35,36,79,95	0.05303344668910312	0.024924377662669986	0.03336000323200702	-0.05878387676453563	0.16485077014274185
H1	65094	6885	35,36,79,103	0.0009475224791481995	0.024914258196192477	0.9696628294597335	-0.11082440238233278	0.11271944734062918
H1	65094	6885	35,36,79,113	0.03919171638776531	0.024902787677079756	0.11554183013857665	-0.07252874870355942	0.15091218147909002
H1	65094	6885	35,36,82,83	0.11638468647434241	0.024883105159215307	2.913892166728034e-06	0.004752522342673232	0.2280168506060116
H1	65094	6885	35,36,82,84	-0.018229066363257718	0.02490649981633518	0.4642325737665922	-0.12996618508908625	0.09350805236257081
H1	65094	6885	35,36,82,85	-0.0069199354686980685	0.02490431448207178	0.7811201193585517	-0.11864725020938835	0.10480737927199221
H1	65094	6885	35,36,82,92	0.01922949933723217	0.024897722260607692	0.43991639382049397	-0.09246824096153206	0.1309272396359964
H1	65094	6885	35,36,82,95	0.021082089911930862	0.0249003752784505	0.3971895253082558	-0.09062755252370003	0.13279173234756175
H1	65094	6885	35,36,82,103	0.009637720098243041	0.02489239966023558	0.6986279158612942	-0.10203614161324097	0.12131158180972705
H1	65094	6885	35,36,82,113	-0.002859166603779384	0.02488371720054244	0.9085239055346093	-0.11449407651405814	0.10877574330649938
H1	65094	6885	35,36,83,84	-0.03880587293574722	0.024904255376351853	0.1191906897465188	-0.15053292251260902	0.0729211766411146
H1	65094	6885	35,36,83,85	0.05439453153789042	0.02490302562543333	0.028947570334941403	-0.05732700105242573	0.16611606412820656
H1	65094	6885	35,36,83,92	0.0168748877174959	0.0248960642924796	0.49789266381733854	-0.09481541449952506	0.12856518993451688
H1	65094	6885	35,36,83,95	0.03000412323325799	0.024898266393641948	0.22818165438509894	-0.08169605818962643	0.14170430465614242
H1	65094	6885	35,36,83,103	0.02223766923179943	0.02489030615412032	0.37163229274806675	-0.08942680045980708	0.13390213892340594
H1	65094	6885	35,36,83,113	-0.04557237366485109	0.024883200446587327	0.0670382951860758	-0.15720496528077055	0.06606021795106835
H1	65094	6885	35,36,84,85	-0.015671835038939874	0.02494346013280854	0.5298135982016539	-0.12757476748007895	0.0962310974021992
H1	65094	6885	35,36,84,92	0.019298145518725995	0.024932689326135623	0.43892814811941094	-0.09255646624657106	0.13115275728402304
H1	65094	6885	35,36,84,95	-0.0781879244033864	0.024936045566074115	0.0017162438629927295	-0.19005759314510506	0.03368174433833228
H1	65094	6885	35,36,84,103	0.011173452136914674	0.024926572021300848	0.6539710849474292	-0.10065371578755183	0.12300062006138118
H1	65094	6885	35,36,84,113	-0.038210252281983825	0.02491508487618146	0.12512879950255912	-0.14998588584764877	0.07356538128368113
H1	65094	6885	35,36,85,92	-0.0011742755600219201	0.024929762922178276	0.9624310122200812	-0.11301575870633063	0.11066720758628679
H1	65094	6885	35,36,85,95	0.05421303276744682	0.024933141482457618	0.029683907947996708	-0.0576436074902119	0.16606967302510556
H1	65094	6885	35,36,85,103	-0.0014497501412390479	0.024924007803419662	0.95361595372329	-0.11326541430885728	0.11036591402637919
H1	65094	6885	35,36,85,113	0.020802507449985685	0.024912529827319986	0.40370881733475117	-0.0909616634934686	0.13256667839343997
H1	65094	6885	35,36,92,95	0.023584698424079092	0.02492779175177623	0.34409098213320877	-0.0882479415325857	0.13541733838074388
H1	65094	6885	35,36,92,103	0.036642833950031206	0.024917274169825816	0.14141026198522127	-0.0751426213635979	0.1484282892636603
H1	65094	6885	35,36,92,113	0.011898189257692815	0.02490780922593137	0.6328732890852666	-0.09984480382449205	0.12364118233987768
H1	65094	6885	35,36,95,103	0.05568182460004267	0.024922662011110895	0.02547471888097323	-0.05612780198878713	0.1674914511888725
H1	65094	6885	35,36,95,113	-0.013975466569053754	0.02490961179456673	0.5747675584731258	-0.1257265464489463	0.09777561331083878
H1	65094	6885	35,36,103,113	0.0073448114738505765	0.024899835402511773	0.7680145656790984	-0.104362408936112	0.11905203188381315
H1	65094	6885	35,57,64,65	0.018177495079796824	0.024914946537058873	0.4656486993926404	-0.0935975178601247	0.12995250801971836
H1	65094	6885	35,57,64,66	0.041210374888591805	0.0249134356044393	0.09810393635985314	-0.07055785960960788	0.15297860938679148
H1	65094	6885	35,57,64,79	-0.037703923032324616	0.024905189022084488	0.13005706792381805	-0.149435161189872	0.07402731512522276
H1	65094	6885	35,57,64,82	-0.07051052958791859	0.024892578125514514	0.004618806458022061	-0.18218519194165295	0.04116413276581575
H1	65094	6885	35,57,64,83	-0.07383760224668973	0.02489081205622883	0.003013717224208891	-0.18550434154841322	0.03782913705503378
H1	65094	6885	35,57,64,84	-0.022400791771171047	0.024921407668006445	0.3687323380511879	-0.13420479104643135	0.08940320750408927
H1	65094	6885	35,57,64,85	-0.03117535779749825	0.024919302332456195	0.21092031830578634	-0.14296991198291975	0.08061919638792324
H1	65094	6885	35,57,64,92	-0.02401750886838605	0.024908568811639914	0.33493625130884097	-0.13576390965213975	0.08772889191536765
H1	65094	6885	35,57,64,95	0.02383896209943004	0.024913386766032018	0.3386350315458633	-0.0879290532968102	0.13560697749567027
H1	65094	6885	35,57,64,103	0.01245190539789276	0.024904593102891077	0.6170880267128594	-0.0992766593091836	0.12418047010496912
H1	65094	6885	35,57,64,113	0.038091120052672456	0.024895053785295638	0.12600538304139686	-0.07359464876294645	0.14977688886829138
H1	65094	6885	35,57,65,66	-0.06291345325730996	0.02491025548294485	0.011552573883328369	-0.17466742089281884	0.04884051437819893
H1	65094	6885	35,57,65,79	-0.045199495977176735	0.024902367904792815	0.0695185743275611	-0.15691807785945122	0.06651908590509777
H1	65094	6885	35,57,65,82	0.06025392437595878	0.024892881592059483	0.015501012593868007	-0.051422099408631544	0.1719299481605491
H1	65094	6885	35,57,65,83	-0.11746129493953172	0.024891072395555082	2.3754151276949178e-06	-0.22912920219204802	-0.005793387687015414
H1	65094	6885	35,57,65,84	0.027489525217827993	0.024913970659815765	0.26986764116575046	-0.08428110967972792	0.1392601601153839
H1	65094	6885	35,57,65,85	-0.0644181410209631	0.02491064298920762	0.00971298263621925	-0.1761738471116387	0.047337565069712484
H1	65094	6885	35,57,65,92	-0.01586192503789713	0.0249062218349181	0.524214657538568	-0.12759779666586635	0.09587394659007209
H1	65094	6885	35,57,65,95	0.05332836426918808	0.024909543371955507	0.032287789473326126	-0.05842240864884751	0.16507913718722367
H1	65094	6885	35,57,65,103	-0.0023166688480101283	0.024899797141295536	0.9258723679445187	-0.11402371760807839	0.10939037991205813
H1	65094	6885	35,57,65,113	0.02748982632439234	0.024893229644574407	0.2694635319282862	-0.08418775891545945	0.13916741156424411
H1	65094	6885	35,57,66,79	-0.047819066358422146	0.02490125592848701	0.054818891715237864	-0.15953265962208632	0.06389452690524203
H1	65094	6885	35,57,66,82	0.061759708836890026	0.024889326020176492	0.013090524345337988	-0.04990036371567019	0.17341978138945024
H1	65094	6885	35,57,66,83	-0.04790627047343898	0.02488746502767519	0.05424478148504588	-0.15955799412343966	0.06374545317656169
H1	65094	6885	35,57,66,84	0.021656037516503523	0.024913175275914894	0.38470828388353495	-0.09011102907936329	0.13342310411237035
H1	65094	6885	35,57,66,85	-0.013806928587171724	0.024911119845511604	0.5794115299619127	-0.12556477398083435	0.0979509168064909
H1	65094	6885	35,57,66,92	-0.028300396457074772	0.024904846064485075	0.2558185767884501	-0.1400300960164937	0.08342930310234416
H1	65094	6885	35,57,66,95	-0.02852718888422001	0.024906931952339898	0.25206833921961425	-0.14026624628599343	0.0832118685175534
H1	65094	6885	35,57,66,103	-0.002466355700258549	0.02489683605807426	0.921088576690012	-0.11416012026102572	0.10922740886050862
H1	65094	6885	35,57,66,113	-0.03484488357263693	0.024893476765706253	0.16159064312876353	-0.14652357746297964	0.07683381031770578
H1	65094	6885	35,57,79,82	-0.010199744458540438	0.024880890137061313	0.6818493372507338	-0.12182197141737416	0.10142248250029329
H1	65094	6885	35,57,79,83	0.009213460002054585	0.024879204637635474	0.7111396434770381	-0.10240120536238226	0.12082812536649143
H1	65094	6885	35,57,79,84	-0.010007488612873816	0.02490271960568297	0.6877861226478701	-0.12172764831798208	0.10171267109223445
H1	65094	6885	35,57,79,85	0.0112850939751441	0.02489903009186994	0.6503817401561803	-0.10041851359915466	0.12298870154944286
H1	65094	6885	35,57,79,92	-0.025632816524698177	0.02489422388625822	0.30316957958340773	-0.1373148621946339	0.08604922914523755
H1	65094	6885	35,57,79,95	0.01020850333770218	0.02489883291611536	0.6818079914219957	-0.10149421965422402	0.12191122632962838
H1	65094	6885	35,57,79,103	-0.005344179769411483	0.024889318025432355	0.8299880910603772	-0.11700421645544364	0.10631585691662067
H1	65094	6885	35,57,79,113	-0.025563964183452526	0.02488199073679333	0.30423250701587146	-0.13719112872258993	0.08606320035568486
H1	65094	6885	35,57,82,83	-0.05570318453925027	0.0248811526670185	0.025174631967749005	-0.1673265892766242	0.05592022019812366
H1	65094	6885	35,57,82,84	-0.02827415337522987	0.024892132982584497	0.25601689173717396	-0.13994681870052633	0.08339851195006659
H1	65094	6885	35,57,82,85	-0.2172538286132184	0.024889701351592165	2.643714159594261e-18	-0.3289155850013743	-0.10559207222506249
H1	65094	6885	35,57,82,92	0.015310783638116887	0.024883263894669334	0.5383560681001976	-0.09632209262261111	0.12694365989884487
H1	65094	6885	35,57,82,95	0.0017800268819928022	0.02488601784540086	0.9429784326569831	-0.1098652043271271	0.1134252580911127
H1	65094	6885	35,57,82,103	0.00794043951548068	0.024879074649173362	0.7496052948715106	-0.10367364268647523	0.1195545217174366
H1	65094	6885	35,57,82,113	-0.029500012290920807	0.02487426229030351	0.23564083879576178	-0.14109250498337692	0.0820924804015353
H1	65094	6885	35,57,83,84	-0.06732903722267514	0.024890469790893776	0.006832164491898588	-0.17899424103195047	0.044336166586600195
H1	65094	6885	35,57,83,85	0.07552506600851339	0.024889055822586496	0.0024106588117043374	-0.036133794366486144	0.18718392638351292
H1	65094	6885	35,57,83,92	-0.04346210562789876	0.024882192834677266	0.08069201847397543	-0.1550901768313775	0.06816596557557998
H1	65094	6885	35,57,83,95	0.02702966945734786	0.02488431489477324	0.2773892098364041	-0.08460792186668718	0.13866726078138292
H1	65094	6885	35,57,83,103	-0.029979222672680272	0.024877444509056195	0.22817868700237967	-0.14158599163668006	0.0816275462913195
H1	65094	6885	35,57,83,113	-0.10212314153415192	0.024874274536952103	4.038641397612917e-05	-0.21371568916829947	0.009469406099995623
H1	65094	6885	35,57,84,85	0.00024491186956532296	0.02491740889739404	0.992157795595443	-0.11154114786742303	0.11203097160655368
H1	65094	6885	35,57,84,92	-0.0057274821358408445	0.024906681439299572	0.818125479989639	-0.11746541567012843	0.10601045139844674
H1	65094	6885	35,57,84,95	-0.0008415819922072965	0.02491099957827648	0.9730498697389534	-0.11259888783537389	0.1109157238509593
H1	65094	6885	35,57,84,103	0.02612255548278053	0.02490256504782207	0.2941868217514683	-0.0855969108350521	0.13784202180061317
H1	65094	6885	35,57,84,113	0.008192822073070927	0.024893789105605996	0.7420729060621698	-0.1034872730563346	0.11987291720247645
H1	65094	6885	35,57,85,92	-0.00779005372342878	0.02490378887538333	0.7544292035316748	-0.11951501045406614	0.10393490300720858
H1	65094	6885	35,57,85,95	0.04075415499327373	0.02490749684337221	0.10179887032627216	-0.07098743665846696	0.15249574664501442
H1	65094	6885	35,57,85,103	0.022499143254072096	0.024898977004168175	0.36620217068386685	-0.08920422615481285	0.13420251266295705
H1	65094	6885	35,57,85,113	-0.02191074949308147	0.024891286511660084	0.3787232937429542	-0.13357961732684454	0.08975811834068159
H1	65094	6885	35,57,92,95	-0.034639198003618366	0.024902020321606655	0.16422480454460037	-0.14635622053616387	0.07707782452892713
H1	65094	6885	35,57,92,103	-0.01499739155433022	0.024892186204131417	0.5468477371947802	-0.12667029564550508	0.09667551253684466
H1	65094	6885	35,57,92,113	-0.07072375079036175	0.02488644523921699	0.004486700838744368	-0.18237089940071938	0.04092339781999589
H1	65094	6885	35,57,95,103	0.013609385839709248	0.024898149972035894	0.5846540893698272	-0.09809027328518413	0.12530904496460263
H1	65094	6885	35,57,95,113	-0.021353601967071367	0.024888526304879127	0.3909127160079676	-0.1330100867861569	0.09030288285201415
H1	65094	6885	35,57,103,113	-0.015152314864908423	0.024879181578413727	0.542503017141688	-0.12676687677960255	0.0964622470497857
H1	65094	6885	35,64,65,66	0.03196949833352636	0.024951236387638062	0.20010074667034441	-0.07996832043509897	0.14390731710215168
H1	65094	6885	35,64,65,79	-0.024058014455402066	0.024942320203354514	0.334776279471961	-0.13595583287274482	0.0878398039619407
H1	65094	6885	35,64,65,82	-0.0005004916782907487	0.0249194601421061	0.9839761367468911	-0.11229575383936989	0.1112947704827884
H1	65094	6885	35,64,65,83	0.03525856405087613	0.024915726629523505	0.15704077119362372	-0.07651994858932365	0.1470370766910759
H1	65094	6885	35,64,65,84	0.0592095960835235	0.024959220467188355	0.01768319138695105	-0.052764041369027945	0.17118323353607495
H1	65094	6885	35,64,65,85	-0.02498391759454316	0.024955191280583783	0.31675791769903794	-0.13693947905467002	0.08697164386558369
H1	65094	6885	35,64,65,92	-0.020268733329109667	0.02494666362607596	0.41651801601048244	-0.13218603748486937	0.09164857082665004
H1	65094	6885	35,64,65,95	0.04229378005750628	0.024951760609939994	0.09007661986796597	-0.06964639051044941	0.15423395062546197
H1	65094	6885	35,64,65,103	0.04591857969431695	0.024941159176637716	0.06561544856599663	-0.06597403005135154	0.15781118943998546
H1	65094	6885	35,64,65,113	0.03655906066548864	0.02492857887614947	0.14250333030379436	-0.07527711053844867	0.14839523186942594
H1	65094	6885	35,64,66,79	-0.01811866820291197	0.024943580013476276	0.46760507027853215	-0.13002213846030392	0.09378480205447999
H1	65094	6885	35,64,66,82	-0.003264647999390524	0.024917878871174998	0.8957628751418049	-0.11505281616255471	0.10852352016377366
H1	65094	6885	35,64,66,83	0.04691602345282453	0.024914197843303315	0.05969126893580105	-0.06485563064969828	0.15868767755534735
H1	65094	6885	35,64,66,84	0.030426857216857783	0.02495983280620983	0.22283664800725062	-0.08154952734983846	0.142403241783554
H1	65094	6885	35,64,66,85	0.0022970122690491868	0.024957025949850352	0.9266676072270744	-0.10966678000067245	0.11426080453877083
H1	65094	6885	35,64,66,92	-0.0483385958249182	0.02494714579076314	0.052671949110531364	-0.1602580630984702	0.06358087144863381
H1	65094	6885	35,64,66,95	0.05232951874894526	0.024951409265131144	0.03597512999392055	-0.059609075593651195	0.1642681130915417
H1	65094	6885	35,64,66,103	0.0042585455383216675	0.024940445214530944	0.8644220579698898	-0.10763086118527314	0.11614795226191647
H1	65094	6885	35,64,66,113	0.015133019608227771	0.024930455066624772	0.5438470672616644	-0.0967115686803837	0.12697760789683926
H1	65094	6885	35,64,79,82	-0.0510718723274004	0.024909648085357127	0.0403411180883835	-0.16282311501733793	0.06067937036253711
H1	65094	6885	35,64,79,83	-0.028613210653098298	0.02490612529430113	0.250625728033257	-0.1403486491744303	0.08312222786823371
H1	65094	6885	35,64,79,84	0.037325364411960105	0.024949338349497866	0.13464702144027646	-0.07460393925761151	0.1492546680815317
H1	65094	6885	35,64,79,85	-0.04309730629450925	0.02494497123372024	0.08404819435527833	-0.15500701793237298	0.06881240534335448
H1	65094	6885	35,64,79,92	0.0022670326387268513	0.02493693169892104	0.9275639015731254	-0.10960661152835685	0.11414067680581055
H1	65094	6885	35,64,79,95	0.013692751995212138	0.024943368158656155	0.5830393917780025	-0.09820976782565269	0.12559527181607696
H1	65094	6885	35,64,79,103	-0.001999418497038552	0.024932594751343577	0.9360840673727364	-0.1138536059749068	0.1098547689808297
H1	65094	6885	35,64,79,113	-0.0019186776477082557	0.0249194988587558	0.938627760623	-0.11371411350187621	0.1098767582064597
H1	65094	6885	35,64,82,83	0.002556165087333806	0.024893488019755612	0.918214057412744	-0.10912257929163874	0.11423490946630635
H1	65094	6885	35,64,82,84	-0.007377362877454385	0.024925237516590638	0.7672466844116944	-0.11919854386227284	0.10444381810736407
H1	65094	6885	35,64,82,85	0.04281027487732608	0.024922145420054522	0.08584564312961131	-0.06899703414795107	0.15461758390260322
H1	65094	6885	35,64,82,92	-0.028057180750380495	0.024912427834718684	0.2600718507842792	-0.13982089412815976	0.08370653262739877
H1	65094	6885	35,64,82,95	0.030955680662245744	0.024917316318148572	0.2141175998848641	-0.08082996373986141	0.1427413250643529
H1	65094	6885	35,64,82,103	-0.0025552129163465276	0.024908783080420837	0.91829444132267	-0.11430257496629137	0.10919214913359832
H1	65094	6885	35,64,82,113	0.060126591772997395	0.02489784024705028	0.015741208331848246	-0.05157167784402675	0.17182486139002154
H1	65094	6885	35,64,83,84	0.007325690350816205	0.024922113075413595	0.7688022111719847	-0.10448147356788193	0.11913285426951434
H1	65094	6885	35,64,83,85	-0.009974934176188999	0.024920269906823278	0.688956242110647	-0.12177382915508722	0.10182396080270922
H1	65094	6885	35,64,83,92	-0.01980802597315523	0.02490948039860916	0.4265002471160344	-0.1315585163761715	0.09194246442986102
H1	65094	6885	35,64,83,95	0.0419887855399077	0.02491442104307135	0.09193210511661273	-0.06978386989556692	0.15376144097538233
H1	65094	6885	35,64,83,103	0.015423400877233484	0.02490562408562265	0.5357384142886806	-0.09630978908994492	0.1271565908444119
H1	65094	6885	35,64,83,113	0.032473834310216	0.024895951785799973	0.19210848674271025	-0.0792159631722051	0.14416363179263708
H1	65094	6885	35,64,84,85	0.04367003818923276	0.024968122648766026	0.08029080925764481	-0.06834353679477426	0.15568361317323978
H1	65094	6885	35,64,84,92	0.054526709838771836	0.02495389608193283	0.028885630594129234	-0.05742304101904226	0.16647646069658595
H1	65094	6885	35,64,84,95	-0.03540621613084047	0.024959766025518686	0.15604098189364718	-0.14738230110176576	0.0765698688400848
H1	65094	6885	35,64,84,103	-0.03196930749863969	0.024950193553092793	0.20008462928668286	-0.14390244783680486	0.07996383283952549
H1	65094	6885	35,64,84,113	0.01982506049745525	0.024936123778074696	0.4265971001729453	-0.09204495912389962	0.13169508011881012
H1	65094	6885	35,64,85,92	-0.02197054342535676	0.024949808751043655	0.3785435968213029	-0.13390195744016992	0.08996087058945638
H1	65094	6885	35,64,85,95	-0.007940696888977139	0.02495609508041631	0.7503444820546774	-0.11990031303322002	0.10401891925526574
H1	65094	6885	35,64,85,103	-0.025428065970932057	0.024945644759316436	0.30804634121692087	-0.13734079922203177	0.08648466728016765
H1	65094	6885	35,64,85,113	-0.0011957660213850058	0.024933287852950826	0.9617493874236367	-0.11305306293563129	0.11066153089286128
H1	65094	6885	35,64,92,95	-0.03685130372130657	0.024946962631901413	0.13963119815517228	-0.14876994929595955	0.07506734185334639
H1	65094	6885	35,64,92,103	-0.007227076497774099	0.02493590745751742	0.7719503214109901	-0.11909612564812866	0.10464197265258046
H1	65094	6885	35,64,92,113	0.00948655240945806	0.02492492404504602	0.7034977090994148	-0.1023332222594406	0.12130632707835672
H1	65094	6885	35,64,95,103	-0.04486819383425733	0.024944114785643602	0.07206362130979575	-0.15677406322045473	0.06703767555194007
H1	65094	6885	35,64,95,113	0.034370884231366805	0.024928749762650526	0.16797256211517514	-0.07746605361442697	0.1462078220771606
H1	65094	6885	35,64,103,113	-0.009553796320038721	0.024917844675798606	0.7014158366906935	-0.12134181107373711	0.10223421843365967
H1	65094	6885	35,65,66,79	0.0003465938087612308	0.02493753786647711	0.9889110240314232	-0.11152976978564785	0.11222295740317031
H1	65094	6885	35,65,66,82	-0.00723154331247744	0.02491426192767469	0.7716205317097167	-0.11900348491437052	0.10454039828941564
H1	65094	6885	35,65,66,83	0.046768409213860274	0.024910582606088326	0.06046124330474198	-0.06498702598223682	0.15852384440995737
H1	65094	6885	35,65,66,84	0.04464153578489727	0.02495000432144927	0.07358143398342683	-0.0672907556102701	0.15657382718006463
H1	65094	6885	35,65,66,85	-0.03712229348688734	0.024946244291124315	0.13673218840971782	-0.14903771639559815	0.07479312942182348
H1	65094	6885	35,65,66,92	-0.03788963636147158	0.024941819035791905	0.12873752061604427	-0.14978520640911736	0.07400593368617421
H1	65094	6885	35,65,66,95	0.04312866702369905	0.02494551551993193	0.08382967560420741	-0.06878348642547918	0.1550408204728773
H1	65094	6885	35,65,66,103	0.007948990775402454	0.024933359573182583	0.7498721520585799	-0.10390862789469511	0.11980660944550002
H1	65094	6885	35,65,66,113	0.010937245340504553	0.024925574753859342	0.6608109049983433	-0.10088544857953201	0.12275993926054111
H1	65094	6885	35,65,79,82	-0.042043107573693894	0.02490628625269798	0.09140659488122069	-0.15377926819679177	0.06969305304940397
H1	65094	6885	35,65,79,83	-0.03786341626028533	0.024902889692253044	0.12840518722899252	-0.14958433901854895	0.0738575064979783
H1	65094	6885	35,65,79,84	-0.014240529537169921	0.02493948389440035	0.5679995578101878	-0.1261256235254403	0.09764456445110045
H1	65094	6885	35,65,79,85	0.02920021055655897	0.02493378079615256	0.24155918919086525	-0.08265929783073506	0.141059718943853
H1	65094	6885	35,65,79,92	0.02193105846857657	0.02493161835533445	0.3790534361480622	-0.08991874863960507	0.13378086557675822
H1	65094	6885	35,65,79,95	0.02291005444865224	0.024936326674164837	0.3582342631133243	-0.08896087541800729	0.13478098431531177
H1	65094	6885	35,65,79,103	0.021748958614835612	0.024924606013774275	0.3828902657664479	-0.09006938928200629	0.13356730651167753
H1	65094	6885	35,65,79,113	-0.021511737849189333	0.024914265433915384	0.38790434760514114	-0.13328369518100175	0.09026021948262307
H1	65094	6885	35,65,82,83	0.15233139331861392	0.024893375596987705	9.455248299582911e-10	0.04065315329779118	0.26400963333943667
H1	65094	6885	35,65,82,84	-0.02518095944635168	0.02491781046693947	0.3122309446336896	-0.1369688207300971	0.08660690183739375
H1	65094	6885	35,65,82,85	0.099711820672582	0.024913602292528224	6.280613361913019e-05	-0.012057161632291438	0.21148080297745542
H1	65094	6885	35,65,82,92	0.023983840517333155	0.024909827420698964	0.3356386282978374	-0.08776820671818604	0.13573588775285234
H1	65094	6885	35,65,82,95	0.05608493309003615	0.024913454494143405	0.02437718618743715	-0.05568338615235183	0.16785325233242412
H1	65094	6885	35,65,82,103	-0.0034860495718860296	0.024903862619295787	0.8886760584583612	-0.11521133713713932	0.10823923799336727
H1	65094	6885	35,65,82,113	0.03405279331985456	0.02489553779788921	0.17137145771354095	-0.07763514690375148	0.1457407335434606
H1	65094	6885	35,65,83,84	-0.017344591680860666	0.024914253502870923	0.4863242523435807	-0.12911649548686488	0.09442731212514356
H1	65094	6885	35,65,83,85	-0.06743884994920268	0.024911182773908098	0.006787894059550556	-0.17919697765622777	0.04431927775782239
H1	65094	6885	35,65,83,92	-0.0037659499892506165	0.024906796883385342	0.8798171345867046	-0.11550440143611576	0.10797250145761453
H1	65094	6885	35,65,83,95	0.06886154545256107	0.024910106713776428	0.005704519402294622	-0.04289175476527142	0.18061484567039354
H1	65094	6885	35,65,83,103	0.014992955051517987	0.024900356574957084	0.5470978815087286	-0.0967166034753148	0.12670251357835077
H1	65094	6885	35,65,83,113	-0.006681411833379641	0.024893666028145862	0.7883938786938874	-0.11836095480487953	0.10499813113812025
H1	65094	6885	35,65,84,85	-0.05333104057418664	0.024952184305366696	0.03257535252937421	-0.1652731119514309	0.05861103080305763
H1	65094	6885	35,65,84,92	0.009171975756850637	0.024944958551318605	0.7131068125545746	-0.10273767898441873	0.12108163049812
H1	65094	6885	35,65,84,95	0.03594149802607027	0.024948874555729843	0.14970140719298508	-0.0759857249424914	0.14786872099463194
H1	65094	6885	35,65,84,103	0.007461122286622768	0.024938640723443865	0.7648043960201285	-0.10442018901463958	0.11934243358788511
H1	65094	6885	35,65,84,113	0.03110408691261357	0.02492607347719888	0.21208974841658498	-0.08072084441169144	0.1429290182369186
H1	65094	6885	35,65,85,92	0.04156169668065601	0.024939302222383605	0.09561645949367267	-0.07032258227909353	0.15344597564040557
H1	65094	6885	35,65,85,95	0.041325310089717515	0.024944052113345515	0.09758148666078362	-0.07058027813204233	0.15323089831147735
H1	65094	6885	35,65,85,103	0.028055854221526066	0.024933073639311666	0.2604892269855031	-0.08380048167390955	0.13991219011696168
H1	65094	6885	35,65,85,113	-0.030271683455991294	0.02492273379027101	0.22451548639971883	-0.14208163206504051	0.08153826515305793
H1	65094	6885	35,65,92,95	-0.029806502084209652	0.024940691996838085	0.23205469393377268	-0.14169701593823852	0.0820840117698192
H1	65094	6885	35,65,92,103	-0.015094282136534742	0.02492908200831139	0.5448565667132997	-0.12693271052387906	0.09674414625080956
H1	65094	6885	35,65,92,113	-0.017163051201047108	0.02491971555196161	0.4909935263063544	-0.12895945919801485	0.09463335679592064
H1	65094	6885	35,65,95,103	0.018236555956719136	0.024935247235742388	0.4645643523634242	-0.09362953126484551	0.1301026431782838
H1	65094	6885	35,65,95,113	0.006739875872539519	0.024922748478432292	0.7868298969899297	-0.10507013863147018	0.11854989037654921
H1	65094	6885	35,65,103,113	0.005376012383980999	0.024910461875646876	0.8291339304530019	-0.1063788811835545	0.1171309059515165
H1	65094	6885	35,66,79,82	-0.033287207946193054	0.024905194626346043	0.1813725631425763	-0.14501847124593398	0.07844405535354786
H1	65094	6885	35,66,79,83	-0.05650542500679412	0.024901773642453873	0.023263910056062678	-0.1682213408716832	0.05521049085809496
H1	65094	6885	35,66,79,84	-0.0026810639745158404	0.02494051421104449	0.9143940095594458	-0.11457078023464459	0.10920865228561291
H1	65094	6885	35,66,79,85	-0.044448382829143096	0.024936075105046838	0.07467405943428383	-0.15631818409047418	0.06742141843218799
H1	65094	6885	35,66,79,92	-0.0115036496458224	0.024932009097599666	0.6445127816022693	-0.1233552097267301	0.1003479104350853
H1	65094	6885	35,66,79,95	0.02108110557460885	0.0249364259064232	0.39789435199213263	-0.09079026947410017	0.13295248062331788
H1	65094	6885	35,66,79,103	-0.007480599040331853	0.024924068232871587	0.7640748318427838	-0.11929653431038897	0.10433533622972527
H1	65094	6885	35,66,79,113	-0.04920250507409185	0.024916324316229737	0.04830583018965227	-0.16098369909429072	0.06257868894610703
H1	65094	6885	35,66,82,83	-0.026922520042818365	0.024889825411516138	0.2794046945464761	-0.13858483299647148	0.08473979291083475
H1	65094	6885	35,66,82,84	-0.009683535169854873	0.024917057776987644	0.6975507282687661	-0.12146801968821253	0.10210094934850278
H1	65094	6885	35,66,82,85	0.05768669962489459	0.02491421208980891	0.02059377963305833	-0.05408501839120494	0.16945841764099412
H1	65094	6885	35,66,82,92	-0.031925878863951374	0.02490834551199919	0.1999410010296849	-0.14367127786669806	0.07981952013879531
H1	65094	6885	35,66,82,95	0.005435834546736101	0.024910944783715052	0.8272657182898968	-0.10632122547359465	0.11719289456706686
H1	65094	6885	35,66,82,103	-0.0175213441126969	0.024901023335758745	0.48166010788833413	-0.1292338939041155	0.09419120567872169
H1	65094	6885	35,66,82,113	-0.025831614013268167	0.024895811026446817	0.2994658572470242	-0.13752078001215398	0.08585755198561765
H1	65094	6885	35,66,83,84	-0.042903175834045015	0.024913474778492182	0.08505903732951815	-0.15467158607736464	0.06886523440927463
H1	65094	6885	35,66,83,85	-0.0274114321767871	0.024911661352845837	0.2711862051988172	-0.13917170691498798	0.08434884256141378
H1	65094	6885	35,66,83,92	-0.04414538908173116	0.02490537092761188	0.07631270194525346	-0.1558774433153896	0.06758666515192731
H1	65094	6885	35,66,83,95	0.011467351612848842	0.02490746371860683	0.6452321420147749	-0.10027409143246906	0.12320879465816674
H1	65094	6885	35,66,83,103	-0.002424034004841147	0.024897432471453353	0.9224402071134203	-0.11412047423312646	0.10927240622344417
H1	65094	6885	35,66,83,113	-0.06725269660668376	0.024893911975062362	0.006903251249898417	-0.17893334296083524	0.04442794974746771
H1	65094	6885	35,66,84,85	-0.0016265368959154092	0.024955347867864068	0.9480325894586616	-0.11358280084782782	0.110329727055997
H1	65094	6885	35,66,84,92	-0.026137213523115932	0.024944847509080784	0.29473507067961624	-0.1380463700996571	0.08577194305342524
H1	65094	6885	35,66,84,95	-0.007151379825043325	0.024948644387777823	0.7743859220670172	-0.11907757019954436	0.10477481054945771
H1	65094	6885	35,66,84,103	0.03428379333748244	0.024937840464918974	0.1692080735386323	-0.07759392779324344	0.1461615144682083
H1	65094	6885	35,66,84,113	-0.008378632404524744	0.02492894626694664	0.7367962596259146	-0.12021645182035151	0.10345918701130202
H1	65094	6885	35,66,85,92	0.01615561884625616	0.024942193083096684	0.5171670246713189	-0.0957416292761256	0.12805286696863794
H1	65094	6885	35,66,85,95	-0.018668354538268317	0.02494477525474738	0.4542295673329746	-0.13057718696283754	0.0932404778863009
H1	65094	6885	35,66,85,103	0.010757574571015671	0.024933715079096225	0.6661450379659615	-0.10110163899225329	0.12261678813428463
H1	65094	6885	35,66,85,113	0.017982275150262572	0.02492590014412212	0.47064831133221796	-0.09384187855620293	0.12980642885672808
H1	65094	6885	35,66,92,95	-0.015252254953437072	0.02494037523936367	0.5408387526281933	-0.12714134774999952	0.09663683784312538
H1	65094	6885	35,66,92,103	-0.01714284308767433	0.02492697143287673	0.4916301881320688	-0.12897180287767812	0.09468611670232945
H1	65094	6885	35,66,92,113	-0.0558473046234734	0.024922128171294695	0.025038108496528967	-0.16765453626627053	0.055959927019323716
H1	65094	6885	35,66,95,103	-0.036201662138675816	0.02493315493790078	0.1465212570753584	-0.14805836276099682	0.07565503848364519
H1	65094	6885	35,66,95,113	-0.025801437380285064	0.024923330042861774	0.30056471801183104	-0.13761406093551365	0.08601118617494351
H1	65094	6885	35,66,103,113	-0.013142245109574957	0.0249110853555246	0.5978025112084322	-0.12489993577207097	0.09861544555292105
H1	65094	6885	35,79,82,83	-0.020480082858386595	0.024881535272967083	0.41045241729364756	-0.13210520406682702	0.09114503835005382
H1	65094	6885	35,79,82,84	-0.04289115619820916	0.02490647777237285	0.0850588204830744	-0.15462817602901613	0.06884586363259783
H1	65094	6885	35,79,82,85	-0.00440240008794221	0.024902261326463757	0.85967618915184	-0.11612050383175906	0.10731570365587464
H1	65094	6885	35,79,82,92	-0.0052554387811215575	0.02489771511499135	0.8328246740512457	-0.11695314702276866	0.10644226946052554
H1	65094	6885	35,79,82,95	-0.02146121007490942	0.024903101264332882	0.38880738076838073	-0.13318308200125278	0.09026066185143396
H1	65094	6885	35,79,82,103	-0.004993317798428598	0.024893537375771664	0.8410222933647322	-0.11667228360148987	0.10668564800463268
H1	65094	6885	35,79,82,113	-0.050891768829629314	0.02488433192801435	0.04084623285376709	-0.16252943656927066	0.06074589891001203
H1	65094	6885	35,79,83,84	-0.0322353905203302	0.024903253172392725	0.19552383617251082	-0.1439579439462437	0.0794871629055833
H1	65094	6885	35,79,83,85	5.557624511712267e-05	0.02489979676449412	0.9982191340326354	-0.11165147082452073	0.11176262331475498
H1	65094	6885	35,79,83,92	-0.02887154029284711	0.02489493602574931	0.24616128185125047	-0.14055678080812248	0.08281370022242826
H1	65094	6885	35,79,83,95	0.006807016072867322	0.024899558369067796	0.7845628727705367	-0.10489896149209299	0.11851299363782763
H1	65094	6885	35,79,83,103	0.005144284115202596	0.02489003744677436	0.83626015008778	-0.10651898008447051	0.1168075483148757
H1	65094	6885	35,79,83,113	-0.02394334184111302	0.024882619444791206	0.3359272026317044	-0.13557332692993504	0.087686643247709
H1	65094	6885	35,79,84,85	0.004540531718988661	0.02494100620488223	0.8555434433562705	-0.10735139175509087	0.11643245519306819
H1	65094	6885	35,79,84,92	-0.008102598249442594	0.024933352949338915	0.7452047463553249	-0.1199601872032327	0.10375499070434752
H1	65094	6885	35,79,84,95	-0.023258353858345293	0.024938853532293356	0.35102255119015013	-0.13514061987616183	0.08862391215947123
H1	65094	6885	35,79,84,103	-0.004443476351383202	0.024927899906117643	0.8585248010938482	-0.11627660151691219	0.10738964881414578
H1	65094	6885	35,79,84,113	0.010404341809194584	0.02491594646191501	0.6762574972271073	-0.10137515705701891	0.12218384067540808
H1	65094	6885	35,79,85,92	-0.05149932246934619	0.024927884616154153	0.038839285149810054	-0.16333237904007147	0.0603337341013791
H1	65094	6885	35,79,85,95	-0.01586111149924241	0.024933496643179544	0.5246898482816462	-0.12771934510145155	0.09599712210296674
H1	65094	6885	35,79,85,103	0.03649111650228276	0.0249231308622256	0.1431593063664205	-0.07532061347614634	0.14830284648071185
H1	65094	6885	35,79,85,113	-0.044612216521067005	0.024911702415862803	0.07332839982255421	-0.15637267547877828	0.06714824243664427
H1	65094	6885	35,79,92,95	-0.07992279868929975	0.024930787908077956	0.0013476628528207837	-0.191768880192343	0.03192328281374353
H1	65094	6885	35,79,92,103	-0.013175828963205571	0.024918742477423518	0.5969796814478521	-0.12496787149148067	0.09861621356506953
H1	65094	6885	35,79,92,113	0.010831650822205052	0.024908430801539486	0.6636665191945839	-0.10091413081188527	0.12257743245629538
H1	65094	6885	35,79,95,103	-0.03500849222836716	0.024926129393595176	0.16017840986597096	-0.14683367440835474	0.07681668995162041
H1	65094	6885	35,79,95,113	0.052848361994403126	0.024912845073923495	0.0338982679540597	-0.0589172232283527	0.16461394721715894
H1	65094	6885	35,79,103,113	-0.015587441276413205	0.024900822521803298	0.5313298715945733	-0.12729909016353183	0.09612420761070542
H1	65094	6885	35,82,83,84	0.02701712275062229	0.024892662884384218	0.27777345633620987	-0.08465791985372763	0.1386921653549722
H1	65094	6885	35,82,83,85	-0.13370753624344334	0.02489045873970301	7.823596742113697e-08	-0.24537269047416593	-0.02204238201272074
H1	65094	6885	35,82,83,92	-0.01178273542387398	0.024883987275340268	0.6358534770726707	-0.12341885696083542	0.09985338611308746
H1	65094	6885	35,82,83,95	0.031807701601000105	0.0248867041676128	0.2012191947620882	-0.07984060863034473	0.14345601183234494
H1	65094	6885	35,82,83,103	-0.007038554680190989	0.024879786204900882	0.7772525544359348	-0.11865582910856942	0.10457871974818744
H1	65094	6885	35,82,83,113	0.010116801083909888	0.024874891856857168	0.6842244447274138	-0.10147851600993825	0.12171211817775802
H1	65094	6885	35,82,84,85	-0.03697134782238587	0.024920155778569875	0.13792256416464457	-0.1487697307918771	0.07482703514710538
H1	65094	6885	35,82,84,92	-0.04261885181403724	0.02491009692023772	0.08710366508095171	-0.1543721080954754	0.06913440446740092
H1	65094	6885	35,82,84,95	-0.015007237008211938	0.02491430265449319	0.5469406784279998	-0.12677936132134054	0.09676488730491667
H1	65094	6885	35,82,84,103	0.014509152727554375	0.024906039855234263	0.5601947658636262	-0.09722590249161842	0.12624420794672717
H1	65094	6885	35,82,84,113	-0.002509260494140131	0.02489607629720202	0.9197179918343161	-0.114199616567508	0.10918109557922774
H1	65094	6885	35,82,85,92	0.013155125583030614	0.02490674667036545	0.5973797631163145	-0.09858310059500083	0.12489335176106206
H1	65094	6885	35,82,85,95	0.042233312325565375	0.0249101369434899	0.0899998447103733	-0.06952012351072448	0.15398674816185523
H1	65094	6885	35,82,85,103	0.013903077680297582	0.024901842942130815	0.5766313077783987	-0.09781314908119627	0.12561930444179142
H1	65094	6885	35,82,85,113	-0.08128019056121605	0.024892817561671183	0.001094474573963459	-0.1929559270886184	0.030395545966186294
H1	65094	6885	35,82,92,95	-0.020225866661742586	0.02490568303394481	0.4167384619120815	-0.13195932108662162	0.09150758776313644
H1	65094	6885	35,82,92,103	-0.04965478589286054	0.024895720247694066	0.046100903437298286	-0.16134354463434974	0.06203397284862866
H1	65094	6885	35,82,92,113	-0.032324341158079625	0.024888362412148257	0.19402687725173595	-0.14398009071120396	0.07933140839504471
H1	65094	6885	35,82,95,103	0.00981355387846261	0.024902005072426923	0.6935183291043694	-0.10190340024224587	0.12153050799917109
H1	65094	6885	35,82,95,113	-0.029382040918464192	0.024890894968709106	0.2378327538467292	-0.14104915218741396	0.08228507035048557
H1	65094	6885	35,82,103,113	-0.0211815026304365	0.024881543484572086	0.39460969418020264	-0.13280666067829994	0.09044365541742695
H1	65094	6885	35,83,84,85	0.0034449934170166507	0.02491789577218997	0.8900403267570909	-0.10834325056855255	0.11523323740258586
H1	65094	6885	35,83,84,92	-0.027711368303146577	0.02490728357985841	0.26589305659724843	-0.13945200319858922	0.08402926659229606
H1	65094	6885	35,83,84,95	-0.006124452011403436	0.024911551702520133	0.805800863235303	-0.11788423482936053	0.10563533080655366
H1	65094	6885	35,83,84,103	0.03255616681134965	0.024903089739454577	0.19111113333083093	-0.07916565341135391	0.1442779870340532
H1	65094	6885	35,83,84,113	-0.04306879599420266	0.024894244190957766	0.08362299153089188	-0.15475093275636895	0.06861334076796363
H1	65094	6885	35,83,85,92	-0.024999278420055893	0.024904455540837086	0.31547559767146527	-0.13672722598752324	0.08672866914741144
H1	65094	6885	35,83,85,95	0.05530571383685512	0.02490827561637306	0.026397154657436542	-0.05643937159570174	0.16705079926941196
H1	65094	6885	35,83,85,103	0.0004354946979977514	0.024899729776786148	0.9860458209043902	-0.11127125184713711	0.11214224124313261
H1	65094	6885	35,83,85,113	-0.03935122978141592	0.02489195404631966	0.11391056734114145	-0.15102309235149525	0.0723206327886634
H1	65094	6885	35,83,92,95	-0.03994104386167996	0.02490277706124204	0.1087461282899858	-0.15166146132756042	0.0717793736042005
H1	65094	6885	35,83,92,103	-0.04772362168654287	0.02489293631394348	0.055223110306710815	-0.15939989096791896	0.0639526475948332
H1	65094	6885	35,83,92,113	-0.05997994281563823	0.02488716634617904	0.015952313117485958	-0.17163032650177235	0.05167044087049588
H1	65094	6885	35,83,95,103	0.018587858301617355	0.024898983561712804	0.4553498437701561	-0.0931155405261401	0.1302912571293748
H1	65094	6885	35,83,95,113	-0.005452359928556305	0.024889186205604704	0.8265998586143467	-0.11711180523611933	0.10620708537900672
H1	65094	6885	35,83,103,113	-0.02386788222848113	0.024879846052582075	0.33739854551519854	-0.13548542514932171	0.08774966069235944
H1	65094	6885	35,84,85,92	-0.01681104526042354	0.024946908749728724	0.5003948108786835	-0.12872944910545686	0.09510735858460978
H1	65094	6885	35,84,85,95	0.02154170750784523	0.024952412170205565	0.3879697112378071	-0.09040138613108742	0.13348480114677788
H1	65094	6885	35,84,85,103	0.05363622473615659	0.024942506561133268	0.03152814173434372	-0.05826242973126963	0.1655348792035828
H1	65094	6885	35,84,85,113	-0.015976772519339044	0.024929669180689038	0.5216071843217434	-0.12781783511663486	0.09586429007795677
H1	65094	6885	35,84,92,95	0.02462650281316947	0.02494355504822482	0.3235049815452379	-0.08727685544352844	0.13652986106986736
H1	65094	6885	35,84,92,103	0.004789359848343722	0.024932427608137037	0.8476695558477636	-0.10706407778107328	0.11664279747776073
H1	65094	6885	35,84,92,113	0.0009445906957284422	0.02492159099468063	0.9697655467762925	-0.11086023103128183	0.11274941242273871
H1	65094	6885	35,84,95,103	-0.03121551985270371	0.024939880535225695	0.21070949651918894	-0.14310239327619462	0.08067135357078718
H1	65094	6885	35,84,95,113	0.015937748891897474	0.02492550990762434	0.522555406066824	-0.0958846541108479	0.12776015189464285
H1	65094	6885	35,84,103,113	-0.0033375310059575725	0.02491423968977628	0.8934340502324218	-0.11510937284278076	0.10843431083086562
H1	65094	6885	35,85,92,95	-0.013878320215659656	0.0249389096126482	0.5778762482899157	-0.12576083782471997	0.09800419739340067
H1	65094	6885	35,85,92,103	-0.02493761030509911	0.024927672613694402	0.3171217764391566	-0.136769715776947	0.08689449516674877
H1	65094	6885	35,85,92,113	-0.016940871955414605	0.024917857823924097	0.496590296805797	-0.12872894569506727	0.09484720178423804
H1	65094	6885	35,85,95,103	-0.026060416147178966	0.024935201637014633	0.2959692902623885	-0.13792629880083987	0.08580546650648194
H1	65094	6885	35,85,95,113	-0.004931083199121611	0.024921254031363214	0.8431501467486161	-0.11673439321993141	0.10687222682168819
H1	65094	6885	35,85,103,113	0.011534538200449251	0.024910547047331498	0.6433386212307257	-0.10022073746969828	0.12328981387059679
H1	65094	6885	35,92,95,103	-0.019319526085830763	0.02492946481528395	0.4383619871121127	-0.13115967184608807	0.09252061967442653
H1	65094	6885	35,92,95,113	-0.010872602988105995	0.024917809588497524	0.6625926739162968	-0.12266046033092948	0.10091525435471749
H1	65094	6885	35,92,103,113	-0.00822732309746943	0.024905519222350382	0.7411432333055344	-0.1199600426203867	0.10350539642544784
H1	65094	6885	35,95,103,113	-0.016471555798499793	0.024911169730941516	0.5084792041700711	-0.12822962499134116	0.09528651339434159
H1	65094	6885	36,57,64,65	-0.04619213481615425	0.02491781186309123	0.06377573369697476	-0.15798000236340426	0.06559573273109574
H1	65094	6885	36,57,64,66	0.02121458057783776	0.024918021613177757	0.39456457871605466	-0.09057422796355007	0.1330033891192256
H1	65094	6885	36,57,64,79	-0.003947496731844996	0.024911791186870626	0.8740957003235456	-0.11570835393968029	0.1078133604759903
H1	65094	6885	36,57,64,82	-0.05847893837015339	0.024899856973500733	0.0188492240033732	-0.1701862555532544	0.05322837881294762
H1	65094	6885	36,57,64,83	-0.026389808788160038	0.024897723498784323	0.2891814890764894	-0.13808755464171077	0.0853079370653907
H1	65094	6885	36,57,64,84	0.007122650007611142	0.02492935703953978	0.7750986988582489	-0.1047170122422689	0.11896231225749118
H1	65094	6885	36,57,64,85	0.016196340633035877	0.02492557568906813	0.5158317185324102	-0.09562635748259365	0.1280190387486654
H1	65094	6885	36,57,64,92	-0.013586193546589853	0.02491466917490584	0.5855430988052488	-0.1253599621668337	0.098187575073654
H1	65094	6885	36,57,64,95	0.0004007618098729182	0.024917421261611013	0.9871677531084427	-0.11138535339624961	0.11218687701599545
H1	65094	6885	36,57,64,103	0.016771878859761724	0.024911659516678036	0.5007882716881854	-0.09498838764090674	0.12853214536043017
H1	65094	6885	36,57,64,113	0.058435204907779426	0.024899562467899566	0.018936888319835865	-0.05327079104561987	0.17014120086117873
H1	65094	6885	36,57,65,66	-0.048079995774368056	0.024909419959503305	0.053587742500310565	-0.15983021503163536	0.06367022348289923
H1	65094	6885	36,57,65,79	0.02493391491372332	0.024904351633380936	0.3167405370522753	-0.08679356649752576	0.1366613963249724
H1	65094	6885	36,57,65,82	-0.14592317948667147	0.024894912295098076	4.609854092885114e-09	-0.2576083135399946	-0.03423804543334835
H1	65094	6885	36,57,65,83	0.005687785046178506	0.024892572981127098	0.8192636012214877	-0.10598685422847881	0.11736242432083582
H1	65094	6885	36,57,65,84	0.009967762742634445	0.024917247239405044	0.689132450092794	-0.10181757175403341	0.1217530972393023
H1	65094	6885	36,57,65,85	-0.03331539078066981	0.024913315639951937	0.1811454929586661	-0.1450830870865797	0.07845230552524006
H1	65094	6885	36,57,65,92	-0.007662102184800124	0.024907129990051402	0.758367380205865	-0.11940204803591188	0.10407784366631163
H1	65094	6885	36,57,65,95	0.030599539051692715	0.02490888716723214	0.21927979230243685	-0.08114828995910484	0.14234736806249026
H1	65094	6885	36,57,65,103	-0.026832783643543842	0.024902454118175606	0.2812544355168105	-0.13855175230176275	0.08488618501467508
H1	65094	6885	36,57,65,113	-0.03990551158347233	0.024892513229455383	0.10891513407869718	-0.15157988279639134	0.07176885962944667
H1	65094	6885	36,57,66,79	-0.01691054270661263	0.024905052677549278	0.4971402579587192	-0.1286411691866609	0.09482008377343566
H1	65094	6885	36,57,66,82	-0.09398743507927798	0.02489315302811819	0.00015975966056922675	-0.20566467659752585	0.01768980643896989
H1	65094	6885	36,57,66,83	0.033442369932369986	0.024890945130121453	0.17909735709036495	-0.07822496637388844	0.1451097062386284
H1	65094	6885	36,57,66,84	0.01859606268721714	0.0249180670182627	0.45549627193249853	-0.09319294955334176	0.13038507492777604
H1	65094	6885	36,57,66,85	0.008858805599605946	0.024914241766562577	0.7221624395156492	-0.10291304555422762	0.12063065675343951
H1	65094	6885	36,57,66,92	0.03279667128350239	0.024907386645657132	0.18792937307281296	-0.07894442599226159	0.14453776855926637
H1	65094	6885	36,57,66,95	0.034776471931788344	0.024907881249472356	0.16265853603348032	-0.07696684426697291	0.1465197881305496
H1	65094	6885	36,57,66,103	-0.020692912751063886	0.02490044715614388	0.4059624921006513	-0.13240287764896036	0.0910170521468326
H1	65094	6885	36,57,66,113	-0.02831860717198975	0.024894468973440158	0.2553147287307453	-0.14000175236758136	0.08336453802360186
H1	65094	6885	36,57,79,82	0.006679630102196299	0.024887338831569464	0.7883964617120136	-0.10497152739883314	0.11833078760322574
H1	65094	6885	36,57,79,83	0.006601436899578678	0.024885294542565932	0.7907988587951932	-0.10504054938250061	0.11824342318165797
H1	65094	6885	36,57,79,84	0.023670216513871245	0.02490993521877065	0.3419983489592626	-0.08808231433219231	0.13542274735993481
H1	65094	6885	36,57,79,85	0.018015059690702828	0.024904905529213667	0.4694654137789458	-0.09371490664315199	0.12974502602455765
H1	65094	6885	36,57,79,92	-0.04401201027418278	0.024899097784437677	0.07713058376750641	-0.1557159215351711	0.06769190098680554
H1	65094	6885	36,57,79,95	0.04352257382794911	0.0249021126247789	0.08051324991429204	-0.06819486280094039	0.1552400104568386
H1	65094	6885	36,57,79,103	-0.011854214716620959	0.024895751039633183	0.6339663617592175	-0.12354311159885986	0.09983468216561794
H1	65094	6885	36,57,79,113	0.004184207833022535	0.024885436440270147	0.8664746569845119	-0.10745841503953472	0.1158268307055798
H1	65094	6885	36,57,82,83	0.04111926884323558	0.024888048317071833	0.0985054409375531	-0.07053507159664103	0.15277360928311218
H1	65094	6885	36,57,82,84	0.06482708489263445	0.02490006643139389	0.009230325677515883	-0.04688117197374797	0.17653534175901686
H1	65094	6885	36,57,82,85	0.02784943504523074	0.024896186326112183	0.2633058221585591	-0.08384141464681052	0.139540284737272
H1	65094	6885	36,57,82,92	0.0031455040168197057	0.024889097931778004	0.8994309390746318	-0.1085135452711048	0.1148045533047442
H1	65094	6885	36,57,82,95	0.010987250039723229	0.02489031671035845	0.6589057654951826	-0.10067726700994811	0.12265176708939457
H1	65094	6885	36,57,82,103	-0.03185673209753914	0.024886252708198248	0.2005173309553104	-0.14350301696303266	0.07978955276795438
H1	65094	6885	36,57,82,113	0.06568124915077012	0.02487869724144323	0.008291349815678912	-0.045931139900696555	0.1772936382022368
H1	65094	6885	36,57,83,84	-0.0022813242171038084	0.024898036278754254	0.9269949742685429	-0.11398047328398812	0.1094178248497805
H1	65094	6885	36,57,83,85	-0.037205595436098526	0.02489509264078685	0.13505166716044814	-0.14889153856768583	0.07448034769548878
H1	65094	6885	36,57,83,92	0.01864007216086616	0.02488748028254348	0.4538759877136065	-0.09301171992649192	0.13029186424822425
H1	65094	6885	36,57,83,95	-0.01806185041426822	0.024888308088941453	0.4680156359038329	-0.1297173562591777	0.09359365543064127
H1	65094	6885	36,57,83,103	-0.033960561991995375	0.02488414616355176	0.17233788055401644	-0.14559739634332586	0.0776762723593351
H1	65094	6885	36,57,83,113	0.012153301147662748	0.024878253698350682	0.6251897607152046	-0.09945709805265833	0.12376370034798383
H1	65094	6885	36,57,84,85	0.007396134799213527	0.024925097442673683	0.7666703210626965	-0.10442441777711699	0.11921668737554404
H1	65094	6885	36,57,84,92	0.06816667409168442	0.024913223474619658	0.006217881250678385	-0.04360060873626784	0.17993395691963668
H1	65094	6885	36,57,84,95	-0.03281596014053406	0.024915227958572424	0.18780876660388485	-0.1445922356114938	0.07896031533042569
H1	65094	6885	36,57,84,103	0.008558368081186263	0.024909198393601065	0.731161424921619	-0.10319085717308153	0.12030759333545406
H1	65094	6885	36,57,84,113	0.008191421893275375	0.024898718048945275	0.7421646535338542	-0.10351078577426899	0.11989362956081974
H1	65094	6885	36,57,85,92	0.007587604610180876	0.024908800726389804	0.7606601690795691	-0.10415983660422883	0.11933504582459058
H1	65094	6885	36,57,85,95	0.011607561623796392	0.024911910741387558	0.6412571481811273	-0.10015383193709337	0.12336895518468616
H1	65094	6885	36,57,85,103	-0.008503695272264356	0.02490522897118488	0.7327719704523279	-0.12023511265199896	0.10322772210747025
H1	65094	6885	36,57,85,113	-0.05722955626129611	0.024894924192698658	0.021517303360553616	-0.16891474369038934	0.05445563116779713
H1	65094	6885	36,57,92,95	-0.02253522398989083	0.024905305870582966	0.36555588027824926	-0.1342669863605811	0.08919653838079944
H1	65094	6885	36,57,92,103	0.018223240040755373	0.024897677502248625	0.4642171106981031	-0.0934742994602204	0.12992077954173115
H1	65094	6885	36,57,92,113	-0.03804426599916222	0.02488938832963766	0.12638554515195258	-0.14970461808837798	0.07361608609005356
H1	65094	6885	36,57,95,103	-0.018671345832309644	0.0249019860984058	0.45338215038358143	-0.13038821483056146	0.09304552316594218
H1	65094	6885	36,57,95,113	-0.0179806623782941	0.024890013094330636	0.47004860197794507	-0.12964381732649005	0.09368249256990185
H1	65094	6885	36,57,103,113	0.021989074251346497	0.024883664279018492	0.37687528116528846	-0.08964559823903592	0.13362374674172892
H1	65094	6885	36,64,65,66	0.01678027236686752	0.024952326166035897	0.5012723684144844	-0.09516243543470589	0.12872298016844091
H1	65094	6885	36,64,65,79	-0.00012519536445720902	0.024945700948374852	0.9959956787657738	-0.11203818069447358	0.11178778996555916
H1	65094	6885	36,64,65,82	0.005115481117413001	0.024922811169334994	0.8373752007011952	-0.10669481463449945	0.11692577686932545
H1	65094	6885	36,64,65,83	0.07279800236864392	0.024918763846663326	0.003485813362911911	-0.03899413602766977	0.1845901407649576
H1	65094	6885	36,64,65,84	-0.01846723748778145	0.024962856318897303	0.45943123761845717	-0.13045718632880854	0.09352271135324562
H1	65094	6885	36,64,65,85	-0.0030110266822505893	0.02495856419019516	0.9039757919627266	-0.11498171990334252	0.10895966653884134
H1	65094	6885	36,64,65,92	-0.022431431532879353	0.024948692157356258	0.3686017850278317	-0.1343578362142921	0.08949497314853339
H1	65094	6885	36,64,65,95	-0.002745423284232107	0.024951849905304913	0.9123868762529754	-0.11468599445471585	0.10919514788625163
H1	65094	6885	36,64,65,103	0.03199075193273804	0.02494483998899863	0.199686541538175	-0.07991837090673375	0.14389987477220983
H1	65094	6885	36,64,65,113	0.10212990736751587	0.02492954895588732	4.195734973692684e-05	-0.00971061586965137	0.21397043060468313
H1	65094	6885	36,64,66,79	-0.05934885606830126	0.024948066545927853	0.017367778789073657	-0.17127245409205566	0.05257474195545314
H1	65094	6885	36,64,66,82	0.08826620341805591	0.024922813855222204	0.000398044995291896	-0.023544104383454043	0.20007651121956588
H1	65094	6885	36,64,66,83	0.026294105648010005	0.02491897318933308	0.29134548946779326	-0.08549897191466255	0.13808718321068256
H1	65094	6885	36,64,66,84	0.03220668961492479	0.024965701111601162	0.19704277763151948	-0.07979602171551049	0.14420940094536006
H1	65094	6885	36,64,66,85	-0.022997538823044728	0.024961016939193253	0.3568776931374392	-0.1349792357222137	0.08898415807612424
H1	65094	6885	36,64,66,92	-0.058539295739910235	0.02495082386469694	0.018969930503716276	-0.1704752638219602	0.053396672342139725
H1	65094	6885	36,64,66,95	0.02059619128435808	0.024953372516344916	0.4091552501863819	-0.09135121072031772	0.13254359328903387
H1	65094	6885	36,64,66,103	0.0008596328513356122	0.024944777841096177	0.9725093122907047	-0.11104921117627557	0.1127684768789468
H1	65094	6885	36,64,66,113	0.056142097225851395	0.02493278101493323	0.024342528853070533	-0.0557129258795432	0.16799712033124597
H1	65094	6885	36,64,79,82	-0.013739230433323701	0.024916722800861022	0.5813575057138536	-0.1255222121605422	0.09804375129389482
H1	65094	6885	36,64,79,83	0.01709270671880092	0.024912881018758937	0.49265331392627154	-0.09467303976195483	0.1288584531995567
H1	65094	6885	36,64,79,84	-0.015868143982496807	0.024957834171175662	0.5249105143078678	-0.12783556214597505	0.09609927418098144
H1	65094	6885	36,64,79,85	-0.015913206063576338	0.02495192848112598	0.5236359746788456	-0.12785412974589083	0.09602771761873814
H1	65094	6885	36,64,79,92	0.010442749675614649	0.024943288469724396	0.6754663966314018	-0.10145941263971169	0.12234491199094098
H1	65094	6885	36,64,79,95	-0.02880824924057379	0.02494784543398445	0.2482020781288001	-0.14073085529790763	0.08311435681676003
H1	65094	6885	36,64,79,103	0.01004076592167824	0.024940264605416974	0.6872494343384155	-0.10184783054185756	0.12192936238521404
H1	65094	6885	36,64,79,113	0.02697624525471981	0.024923906515388543	0.27910410371343425	-0.08483896450811083	0.13879145501755047
H1	65094	6885	36,64,82,83	-0.05790931165410623	0.024900956607343237	0.020044074749209228	-0.1696215620842761	0.05380293877606364
H1	65094	6885	36,64,82,84	0.03041198037390669	0.024933800356518872	0.22258015559617847	-0.08144761576634295	0.14227157651415634
H1	65094	6885	36,64,82,85	-0.022816620060641446	0.024929249059198407	0.36006156406917933	-0.13465579788226728	0.0890225577609844
H1	65094	6885	36,64,82,92	0.01338541355272782	0.024919404524198132	0.5911672946486195	-0.09840959909176604	0.1251804261972217
H1	65094	6885	36,64,82,95	0.02035288062147808	0.024922085547329973	0.41412586370173543	-0.09145415979898583	0.132159921041942
H1	65094	6885	36,64,82,103	0.03664828397974185	0.024916777728081107	0.1413431563791695	-0.0751349441654542	0.14843151212493788
H1	65094	6885	36,64,82,113	0.052532470566235334	0.024902887149785294	0.034906292015036505	-0.05918844078584827	0.16425338191831895
H1	65094	6885	36,64,83,84	0.0036072022861552977	0.024930341190251146	0.8849551471124979	-0.10823687512304825	0.11545127969535884
H1	65094	6885	36,64,83,85	0.029963695860570072	0.02492660824457677	0.22933868942205834	-0.08186363457105371	0.14179102629219387
H1	65094	6885	36,64,83,92	-0.01799189175923499	0.024915825330113075	0.4702315987299678	-0.12977084719627802	0.09378706367780804
H1	65094	6885	36,64,83,95	0.010045641427272933	0.024918625273575704	0.6868482860629792	-0.10174587529366853	0.1218371581482144
H1	65094	6885	36,64,83,103	0.03164172356421724	0.024912906661022808	0.2040563644856223	-0.0801241379544886	0.14340758508292306
H1	65094	6885	36,64,83,113	0.05956228532403429	0.02490068279262134	0.016760266531089953	-0.0521487367011684	0.171273307349237
H1	65094	6885	36,64,84,85	0.06462554303627521	0.02497633879803725	0.009670743799332669	-0.04742489175755486	0.1766759778301053
H1	65094	6885	36,64,84,92	0.03844514659773135	0.02496109627212054	0.1235164003894611	-0.07353690620984628	0.15042719940530896
H1	65094	6885	36,64,84,95	0.002090603584526507	0.024964530978301074	0.9332610922133633	-0.10990685821970311	0.11408806538875613
H1	65094	6885	36,64,84,103	-0.010135007663837792	0.024957465382447842	0.6846770666396294	-0.12210077134394146	0.10183075601626587
H1	65094	6885	36,64,84,113	-0.030837055813043912	0.024941486796809863	0.21632381978340454	-0.14273113534910215	0.08105702372301432
H1	65094	6885	36,64,85,92	-0.035686653117329104	0.024956075863839664	0.15272854362829105	-0.14764618305094737	0.07627287681628916
H1	65094	6885	36,64,85,95	0.027839671296211288	0.024960268382796236	0.2647010223100377	-0.08413866738178556	0.13981800997420812
H1	65094	6885	36,64,85,103	0.012579140139948652	0.024951706044192286	0.6141652726289711	-0.0993607856316898	0.12451906591158711
H1	65094	6885	36,64,85,113	0.021266298991309218	0.024937332683952703	0.3937794784168568	-0.09060914410024883	0.13314174208286728
H1	65094	6885	36,64,92,95	-0.052847614900281226	0.02495118718045998	0.03417589840067764	-0.16478521291254417	0.0590899831119817
H1	65094	6885	36,64,92,103	-0.014582621095667186	0.024942685185368643	0.5587885765588233	-0.1264820769184642	0.09731683472712983
H1	65094	6885	36,64,92,113	-0.02293666277526102	0.024928714585438917	0.3575295055091481	-0.13477344280681758	0.08890011725629555
H1	65094	6885	36,64,95,103	-0.026765915602369406	0.02494915035978176	0.28335690671376385	-0.13869437590055672	0.08516254469581792
H1	65094	6885	36,64,95,113	0.004176229746474747	0.024930511288383885	0.8669655810629163	-0.10766861076775733	0.11602107026070682
H1	65094	6885	36,64,103,113	0.008576278296076323	0.024923147906167103	0.7307655942053847	-0.10323552814596386	0.1203880847381165
H1	65094	6885	36,65,66,79	0.009268461302274877	0.02493814856519577	0.7101488857773248	-0.1026106420474485	0.12114756465199826
H1	65094	6885	36,65,66,82	-0.09180578396805222	0.02491407885419315	0.00022900356768867298	-0.20357690425408426	0.01996533631797981
H1	65094	6885	36,65,66,83	0.06016112472779803	0.02490998416846034	0.015732179361008906	-0.05159162571946718	0.17191387517506324
H1	65094	6885	36,65,66,84	0.039109780713786846	0.024951936360599974	0.11702557712040863	-0.07283117831792349	0.15105073974549718
H1	65094	6885	36,65,66,85	0.020941093337534245	0.024946055023757147	0.40121741776833253	-0.09097348046791308	0.13285566714298158
H1	65094	6885	36,65,66,92	0.04514611784054168	0.02494101096048463	0.07028298715404162	-0.06674582696842288	0.15703806264950623
H1	65094	6885	36,65,66,95	0.019806687441935367	0.024942002108093365	0.4271347705042945	-0.09208970391627733	0.13170307880014806
H1	65094	6885	36,65,66,103	-0.020216869014360483	0.02493401898591519	0.41747540902939484	-0.13207744598367055	0.09164370795494957
H1	65094	6885	36,65,66,113	-0.030914293744457866	0.024922805250785177	0.21483179687341933	-0.14272456294419683	0.08089597545528111
H1	65094	6885	36,65,79,82	-0.01669747930443699	0.024909101465475474	0.5026459788444846	-0.12844626971360185	0.09505131110472785
H1	65094	6885	36,65,79,83	-0.016061441855019343	0.024905031797033197	0.5189896712304414	-0.12779197465957243	0.09566909094953374
H1	65094	6885	36,65,79,84	0.008149682123881896	0.024943501244127683	0.7438765587728855	-0.10375343475346388	0.12005279900122767
H1	65094	6885	36,65,79,85	0.007452619642441594	0.024936811913646394	0.7650478118506903	-0.10442048713634774	0.11932572642123093
H1	65094	6885	36,65,79,92	-0.020195369437290056	0.024933042593987022	0.4179525937891335	-0.13205156605522175	0.09166082718064164
H1	65094	6885	36,65,79,95	0.012602137224788867	0.024936289072023145	0.613298510701876	-0.09926862394875835	0.12447289839833608
H1	65094	6885	36,65,79,103	-0.0030729804292086715	0.024927928014187486	0.9018900769252918	-0.11490623169494285	0.10876027083652551
H1	65094	6885	36,65,79,113	-0.018046255627776342	0.024914071984015948	0.4688600175688995	-0.1298173450923838	0.09372483383683111
H1	65094	6885	36,65,82,83	-0.15903571003439865	0.02489566626930146	1.6923636223833421e-10	-0.2707242266146003	-0.04734719345419697
H1	65094	6885	36,65,82,84	0.046942467838761326	0.02492184431662676	0.059625810439228814	-0.06486349035722609	0.15874842603474876
H1	65094	6885	36,65,82,85	-0.025289568154951203	0.02491684126566994	0.31012966986447127	-0.137073081346507	0.0864939450366046
H1	65094	6885	36,65,82,92	-0.006453296289269328	0.024911470435629166	0.7955982018265564	-0.11821271452254727	0.10530612194400861
H1	65094	6885	36,65,82,95	0.03894802617965909	0.024913498712228713	0.11798037299905345	-0.07282049143670695	0.15071654379602512
H1	65094	6885	36,65,82,103	-0.021145561842317195	0.02490724919779822	0.39590025982166777	-0.13288604249078134	0.09059491880614697
H1	65094	6885	36,65,82,113	0.024267345824907194	0.024895630641150378	0.3296817614386012	-0.08742101091802403	0.1359557025678384
H1	65094	6885	36,65,83,84	-0.0016468774552717245	0.024917822098309342	0.9473045271904478	-0.1134347909204062	0.11014103600986275
H1	65094	6885	36,65,83,85	-0.028845376578520432	0.02491403524403184	0.24695194477205631	-0.1406163012178816	0.08292554806084074
H1	65094	6885	36,65,83,92	-0.024387836810226493	0.024907876799020262	0.32752403649283446	-0.13613113304308738	0.08735545942263438
H1	65094	6885	36,65,83,95	0.03404899722478988	0.02490966906230799	0.17166230132239063	-0.07770233957327469	0.14580033402285444
H1	65094	6885	36,65,83,103	-0.03654688445892448	0.024903274888024098	0.1422309910301598	-0.14826953530688036	0.07517576638903141
H1	65094	6885	36,65,83,113	-0.040417701473046574	0.024893210520485383	0.10445731354017924	-0.15209520091719758	0.07125979797110443
H1	65094	6885	36,65,84,85	-0.03417701662142408	0.02495664493915855	0.17086219481880685	-0.14613909957682136	0.0777850663339732
H1	65094	6885	36,65,84,92	0.051765544664178986	0.02494711130022294	0.03798984452543001	-0.06015376787572464	0.1636848572040826
H1	65094	6885	36,65,84,95	0.003374184528760038	0.024949350118513566	0.8924214991045933	-0.10855517193971605	0.11530354099723612
H1	65094	6885	36,65,84,103	-0.008697077935368114	0.02494145952941868	0.7273160764790003	-0.12059103514272708	0.10319687927199085
H1	65094	6885	36,65,84,113	-0.016741226580924362	0.024927315737448674	0.5018399877756168	-0.12857173101193015	0.09508927785008144
H1	65094	6885	36,65,85,92	0.04106362906460104	0.024940847631177487	0.09967843797531291	-0.07082758300606957	0.15295484113527164
H1	65094	6885	36,65,85,95	0.018280308767926634	0.02494424341822491	0.4636548296001707	-0.09362613769791325	0.13018675523376652
H1	65094	6885	36,65,85,103	-0.0011044525783504566	0.024936619624099987	0.9646730847180225	-0.11297669669558418	0.11076779153888326
H1	65094	6885	36,65,85,113	-0.04271817510592657	0.024922503945320976	0.08652665628874259	-0.15452709256998715	0.069090742358134
H1	65094	6885	36,65,92,95	0.022110672967929346	0.0249400158206786	0.3753226846733023	-0.08977680738173843	0.13399815331759712
H1	65094	6885	36,65,92,103	-0.0015187299416881128	0.024930781656978564	0.951424832388728	-0.11336478340065294	0.11032732351727671
H1	65094	6885	36,65,92,113	-0.002233517643476457	0.024918768996259548	0.928580009345074	-0.11402567914223523	0.10955864385528231
H1	65094	6885	36,65,95,103	0.033916445680566065	0.024935384333413864	0.1737803358927616	-0.07795025659726532	0.14578314795839745
H1	65094	6885	36,65,95,113	0.05159922594458144	0.024920166120576105	0.038402354325309675	-0.06019920342187392	0.16339765531103678
H1	65094	6885	36,65,103,113	-0.0008370263187034155	0.024911115607271894	0.9731958266396346	-0.1125948526985063	0.11092080006109947
H1	65094	6885	36,66,79,82	-0.01932465791589244	0.024909609905896954	0.4378753910384835	-0.13107572932271488	0.09242641349092999
H1	65094	6885	36,66,79,83	-0.019739754537681675	0.024905826579672833	0.4280282638609174	-0.1314738529465076	0.09199434387114423
H1	65094	6885	36,66,79,84	0.02881248070414555	0.024945858492208088	0.24809493569950752	-0.08310121140900488	0.140726172817296
H1	65094	6885	36,66,79,85	-0.02245469910947223	0.024939293708895024	0.3679248179980077	-0.1343389398754695	0.08942954165652503
H1	65094	6885	36,66,79,92	-0.0007622725785585427	0.024934759275424326	0.9756120289795436	-0.11262617068160413	0.11110162552448705
H1	65094	6885	36,66,79,95	0.02403467109962998	0.024937597411342126	0.33515393642015223	-0.08784195962872811	0.13591130182798805
H1	65094	6885	36,66,79,103	-0.014256352635770853	0.024929120127635204	0.5674085425303212	-0.12609495203644266	0.09758224676490097
H1	65094	6885	36,66,79,113	-0.008365359700885228	0.02491770817587676	0.7370836346698372	-0.12015276207997916	0.1034220426782087
H1	65094	6885	36,66,82,83	-0.18300089436513678	0.0248938930158737	1.9895038865969553e-13	-0.2946814556633739	-0.07132033306689964
H1	65094	6885	36,66,82,84	-0.021436589500079095	0.024922327207353736	0.38971765086828025	-0.13324471407106458	0.0903715350709064
H1	65094	6885	36,66,82,85	0.002856384397160683	0.02491775271189106	0.9087368101430227	-0.1089312177822245	0.11464398657654587
H1	65094	6885	36,66,82,92	0.03205993024874754	0.02491144704250989	0.1981148263913914	-0.07969938303683542	0.1438192435343305
H1	65094	6885	36,66,82,95	0.03771845143612618	0.024912353013885374	0.13001957210575496	-0.07404492627568651	0.14948182914793887
H1	65094	6885	36,66,82,103	-0.005013098674395033	0.02490518129039021	0.8404745737719788	-0.1167443021455253	0.10671810479673523
H1	65094	6885	36,66,82,113	0.0015877251037070828	0.024897328527453997	0.9491528667087341	-0.11010824880441754	0.1132836990118317
H1	65094	6885	36,66,83,84	-0.004890517459586796	0.024918632898910706	0.8444077749402138	-0.11668206838978966	0.10690103347061607
H1	65094	6885	36,66,83,85	0.0008212356626733364	0.02491491536750494	0.9737053167421197	-0.11095363744241896	0.11259610876776563
H1	65094	6885	36,66,83,92	0.022848951028817233	0.024908108521968612	0.3589736297788453	-0.08889538477422741	0.1345932868318619
H1	65094	6885	36,66,83,95	0.0073629859972881295	0.02490866047320964	0.7675370585213279	-0.10438382600441166	0.11910979799898792
H1	65094	6885	36,66,83,103	-0.013051534550387128	0.02490124712222453	0.6001888936133627	-0.12476508830683818	0.09866201920606392
H1	65094	6885	36,66,83,113	-0.02682195407354182	0.02489516941521831	0.28130788905310883	-0.13850824163545158	0.08486433348836794
H1	65094	6885	36,66,84,85	0.014128782977805732	0.024960211567955474	0.571360469757042	-0.09784930081385003	0.12610686676946148
H1	65094	6885	36,66,84,92	-0.00553371307039896	0.024948590875632566	0.8244667499497741	-0.11745966337532089	0.10639223723452297
H1	65094	6885	36,66,84,95	-0.00755548871100209	0.02495092338312883	0.7620327018765767	-0.11949190325895137	0.10438092583694719
H1	65094	6885	36,66,84,103	0.0023562105761099073	0.024942327232754472	0.9247390380643362	-0.10954163937697267	0.11425406052919249
H1	65094	6885	36,66,84,113	0.00977797983508144	0.024931578065392163	0.6949173647869622	-0.10207164652180645	0.12162760619196933
H1	65094	6885	36,66,85,92	0.006217441627146547	0.02494382875235256	0.8031623213015728	-0.10568714453836403	0.11812202779265712
H1	65094	6885	36,66,85,95	0.013271618736768298	0.024946793187460146	0.5947301148063097	-0.09864626666548826	0.12518950413902485
H1	65094	6885	36,66,85,103	0.009408531025441147	0.02493717091159785	0.7059599011513809	-0.10246618631272104	0.12128324836360334
H1	65094	6885	36,66,85,113	-0.03900685355210587	0.024926710214004624	0.11762078237788119	-0.15083464144544245	0.07282093434123073
H1	65094	6885	36,66,92,95	0.023419485918710126	0.024941016496292955	0.3477372874087834	-0.08847248372534874	0.135311455562769
H1	65094	6885	36,66,92,103	0.03670300704185869	0.024930080206850887	0.14096207334381325	-0.0751398995270664	0.1485459136107838
H1	65094	6885	36,66,92,113	-0.0063476328895824	0.024922510055954417	0.7989597581615222	-0.11815657776755417	0.10546131198838937
H1	65094	6885	36,66,95,103	-0.02074592692815158	0.02493464972627571	0.40540560392530955	-0.13260933356486043	0.09111747970855728
H1	65094	6885	36,66,95,113	0.0007181905416187018	0.02492201473387871	0.9770102302650356	-0.11108853219105008	0.11252491327428749
H1	65094	6885	36,66,103,113	-0.005798055599952667	0.024912946972029764	0.8159698502381572	-0.11756409796445391	0.10596798676454858
H1	65094	6885	36,79,82,83	-0.022864674063432622	0.024888294471928897	0.3582605644970517	-0.13452011881883696	0.08879077069197172
H1	65094	6885	36,79,82,84	-0.0039633007863707215	0.024914581928277578	0.8736099042592731	-0.1157366779952588	0.10781007642251736
H1	65094	6885	36,79,82,85	-0.01347642367280466	0.02490876439331013	0.58848801046245	-0.12522370188744855	0.09827085454183923
H1	65094	6885	36,79,82,92	0.011950687201032983	0.024903490214827833	0.6313145174207824	-0.09977292965968308	0.12367430406174905
H1	65094	6885	36,79,82,95	0.023906139386197456	0.02490699322942515	0.3371516377651318	-0.08783319292072121	0.13564547169311614
H1	65094	6885	36,79,82,103	-0.015582887520595778	0.02490065217356683	0.5314470209502605	-0.12729377218065469	0.09612799713946311
H1	65094	6885	36,79,82,113	0.015583846127486478	0.024888425160768946	0.5312201024916616	-0.0960721849324787	0.12723987718745167
H1	65094	6885	36,79,83,84	0.019872952664665156	0.024910792694439465	0.4250102668716188	-0.09188342504311392	0.13162933037244423
H1	65094	6885	36,79,83,85	0.005500984409705034	0.024905829028672877	0.8251933703089578	-0.10623312498598016	0.11723509380539023
H1	65094	6885	36,79,83,92	-0.011915161894498927	0.02490011398026573	0.632283101720165	-0.12362363207764514	0.09979330828864728
H1	65094	6885	36,79,83,95	0.013685704828716783	0.02490313369533766	0.5826249985025194	-0.09803631259165659	0.12540772224909014
H1	65094	6885	36,79,83,103	-0.02272899469850953	0.02489677984486134	0.3612836152845693	-0.1344225070719966	0.08896451767497753
H1	65094	6885	36,79,83,113	-0.00311422759850144	0.024886308646916794	0.9004145825013737	-0.11476076341982101	0.10853230822281813
H1	65094	6885	36,79,84,85	-0.00027683414375534454	0.024949586137295306	0.9911470993145305	-0.11220724945465535	0.11165358116714466
H1	65094	6885	36,79,84,92	0.030867924656853396	0.02493985781322824	0.2158343545679432	-0.08101884682977178	0.14275469614347858
H1	65094	6885	36,79,84,95	-0.0016215658092645496	0.024943723383995822	0.9481670801790048	-0.11352567926457202	0.11028254764604292
H1	65094	6885	36,79,84,103	0.06008037543921951	0.024935599662454986	0.015980906970456628	-0.05178729286140955	0.17194804373984857
H1	65094	6885	36,79,84,113	0.023000468745250524	0.024920702716489357	0.35603905016146276	-0.08880036793181488	0.13480130542231594
H1	65094	6885	36,79,85,92	0.028328223778501638	0.024933250380630878	0.25589324455744034	-0.08352890502504688	0.14018535258205017
H1	65094	6885	36,79,85,95	-0.021818762081635024	0.02493787060633308	0.3816184204656249	-0.13369661843468403	0.09005909427141398
H1	65094	6885	36,79,85,103	-0.04487115227335903	0.024930028668563423	0.07188417989983925	-0.156713827627951	0.06697152308123296
H1	65094	6885	36,79,85,113	-0.029399429848508463	0.024915240102198203	0.23801387252126288	-0.14117575979897218	0.08237690010195524
H1	65094	6885	36,79,92,95	0.004450462329711691	0.024934206474235106	0.8583401866433602	-0.10741095576158728	0.11631188042101066
H1	65094	6885	36,79,92,103	0.012990476504868897	0.024924391715195802	0.6022326915529574	-0.0988269099921022	0.12480786300183999
H1	65094	6885	36,79,92,113	0.008950818573610575	0.02491127844546036	0.719366085584789	-0.10280773834119852	0.12070937548841967
H1	65094	6885	36,79,95,103	-0.005898192062217422	0.024930687849127914	0.8129806712475386	-0.11774382467445457	0.10594744055001973
H1	65094	6885	36,79,95,113	0.06335127534722962	0.024913949955885698	0.010999276160280076	-0.04841926666704245	0.17512181736150167
H1	65094	6885	36,79,103,113	0.0001839479507511621	0.024905672047377474	0.9941070746911513	-0.11154945718549285	0.11191735308699517
H1	65094	6885	36,82,83,84	0.03801707256143161	0.024900838510208807	0.12683144605267543	-0.07369464805388559	0.1497287931767488
H1	65094	6885	36,82,83,85	0.016475402679458406	0.024897148222971278	0.5081414159641313	-0.09521976233526325	0.12817056769418006
H1	65094	6885	36,82,83,92	0.00574009869470693	0.024890097768181428	0.8176125763487126	-0.10592343612268737	0.11740363351210123
H1	65094	6885	36,82,83,95	0.023742247142651662	0.024891337398445276	0.3401707578604023	-0.08792684898263371	0.13541134326793702
H1	65094	6885	36,82,83,103	-0.029487395742791578	0.02488722169202893	0.23608523385303729	-0.1411380277249868	0.08216323623940364
H1	65094	6885	36,82,83,113	0.11115636503855297	0.024879599113822932	7.918732531365105e-06	-0.0004600700499686472	0.2227728001270746
H1	65094	6885	36,82,84,85	-0.025162311255056857	0.02492858852054332	0.3127986881657345	-0.13699852572628538	0.08667390321617166
H1	65094	6885	36,82,84,92	0.03209017934177916	0.02491752194173395	0.19780122539243677	-0.07969638754189472	0.14387674622545304
H1	65094	6885	36,82,84,95	-0.01852664047420205	0.024919521667973114	0.45720688916857977	-0.13032217865652698	0.09326889770812288
H1	65094	6885	36,82,84,103	-0.0017807290971336709	0.024913655516312968	0.9430191495481467	-0.11354995017792499	0.10998849198365765
H1	65094	6885	36,82,84,113	-0.006409198330971089	0.024901757214663513	0.7968868445753376	-0.11812504049646541	0.10530664383452323
H1	65094	6885	36,82,85,92	0.0007092340826038712	0.02491253588452948	0.9772882188805707	-0.11105496403508772	0.11247343220029546
H1	65094	6885	36,82,85,95	0.04209989618306151	0.024915211286762252	0.09108561989013447	-0.06967630449376633	0.15387609685988934
H1	65094	6885	36,82,85,103	-0.009619109338786846	0.024908875599108746	0.6993707294412859	-0.12136688645193573	0.10212866777436204
H1	65094	6885	36,82,85,113	-0.058481273657060795	0.02489703341955575	0.018831004416213454	-0.17017592363342035	0.05321337631929876
H1	65094	6885	36,82,92,95	-0.012836792364230742	0.024909664743992935	0.6063217358654389	-0.12458810978919649	0.098914525060735
H1	65094	6885	36,82,92,103	0.017750581677365707	0.024902163804341817	0.47596444718778563	-0.09396708455652411	0.12946824791125552
H1	65094	6885	36,82,92,113	-0.024461269056499813	0.02489213431772859	0.3257637705945027	-0.13613394037160437	0.08721140225860473
H1	65094	6885	36,82,95,103	0.001110156268180118	0.02490685218140125	0.9644483564199369	-0.11062854326015027	0.11284885579651051
H1	65094	6885	36,82,95,113	0.02198804285059275	0.024892983447815833	0.37707632056168283	-0.0896884378857501	0.1336645235869356
H1	65094	6885	36,82,103,113	0.01244761855347068	0.02488674177826836	0.6169567925897873	-0.09920086040918191	0.12409609751612327
H1	65094	6885	36,83,84,85	-0.03852017592209034	0.024925797160471518	0.12225644130666763	-0.1503438676167726	0.07330351577259193
H1	65094	6885	36,83,84,92	0.04347349319561197	0.024914051168208776	0.08100080929669305	-0.06829750288380147	0.15524448927502543
H1	65094	6885	36,83,84,95	-0.0172425596964505	0.02491623945856791	0.48892693307921387	-0.1290233730228263	0.09453825362992531
H1	65094	6885	36,83,84,103	-0.00866088827000805	0.024910102557678823	0.7280774393415184	-0.12041416984249194	0.10309239330247584
H1	65094	6885	36,83,84,113	0.010896357138686585	0.024899445522777272	0.6616674187707765	-0.10080911416808992	0.12260182844546309
H1	65094	6885	36,83,85,92	0.024959595899279208	0.024909714924261993	0.3163465649222437	-0.08679194664759138	0.1367111384461498
H1	65094	6885	36,83,85,95	0.013263491439890807	0.024912768093328173	0.5944528600076124	-0.09850174842763718	0.1250287313074188
H1	65094	6885	36,83,85,103	-0.015290379624436079	0.024906066488185302	0.5392693378781623	-0.12702555432604254	0.09644479507717038
H1	65094	6885	36,83,85,113	-0.06694492894398218	0.02489574026497834	0.007168438458544263	-0.17863377748828135	0.04474391960031697
H1	65094	6885	36,83,92,95	-0.00874211869186936	0.024906314105445002	0.7255895452040462	-0.12047840426972699	0.10299416688598827
H1	65094	6885	36,83,92,103	0.008963012143347937	0.024898742305420742	0.718864510734591	-0.1027393043451347	0.12066532863183058
H1	65094	6885	36,83,92,113	-0.041322692748166245	0.024890283539783987	0.09688087147262789	-0.1529870609859032	0.0703416754895707
H1	65094	6885	36,83,95,103	-0.01207706422685717	0.02490312321444502	0.6277052461929302	-0.12379903462718542	0.09964490617347108
H1	65094	6885	36,83,95,113	-0.007119464355053728	0.02489094868383647	0.7748590452978111	-0.1187868166042138	0.10454788789410634
H1	65094	6885	36,83,103,113	0.004799450408384975	0.024884618588269767	0.8470629003749778	-0.10683950336467053	0.11643840418144048
H1	65094	6885	36,84,85,92	-0.0019201528062084972	0.024953730904980896	0.9386647584246652	-0.11386916263670743	0.11002885702429044
H1	65094	6885	36,84,85,95	-0.018516575050797512	0.02495755188111925	0.45813714625433355	-0.13048272678672546	0.09344957668513044
H1	65094	6885	36,84,85,103	0.043170373162986886	0.024950082217771237	0.08358738729599054	-0.06876226769559927	0.15510301402157306
H1	65094	6885	36,84,85,113	-0.03151933736764079	0.024935231152003155	0.2062177414591251	-0.14338535243331466	0.08034667769803308
H1	65094	6885	36,84,92,95	-0.026989037827131024	0.024947775424325188	0.2793363687168588	-0.13891132980269236	0.08493325414843031
H1	65094	6885	36,84,92,103	0.030698199918546054	0.02493903280332319	0.21835407587113606	-0.08118487035633157	0.14258127019342368
H1	65094	6885	36,84,92,113	0.013704477019980787	0.024926094374275135	0.5824556318057681	-0.09812054805411274	0.12552950209407432
H1	65094	6885	36,84,95,103	-0.005116907257255665	0.024944249352926103	0.8374683505072711	-0.11702338034772834	0.10678956583321701
H1	65094	6885	36,84,95,113	0.020067338799684364	0.024927703723627265	0.420810529846248	-0.09176490623951693	0.13189958383888567
H1	65094	6885	36,84,103,113	0.023439703401475054	0.02491969504759555	0.3469088842386794	-0.08835661260750556	0.13523601941045565
H1	65094	6885	36,85,92,95	-0.02353388573247911	0.02494313129989034	0.3454282837964461	-0.1354353429425302	0.08836757147757199
H1	65094	6885	36,85,92,103	0.0016208173425305006	0.024933449009058032	0.9481696520594947	-0.11023720256046238	0.11347883724552338
H1	65094	6885	36,85,92,113	0.0058658695782300985	0.024920839564444918	0.813914562253115	-0.10593558103481068	0.11766732019127088
H1	65094	6885	36,85,95,103	-0.023025689975610053	0.02493998057748449	0.3558838376197824	-0.13491301221502577	0.08886163226380565
H1	65094	6885	36,85,95,113	-0.021460595805975688	0.024923068474060596	0.38920106593691917	-0.13327204589466307	0.09035085428271171
H1	65094	6885	36,85,103,113	0.03740205902978189	0.024914883556984922	0.13331096799956377	-0.0743726713649385	0.14917678942450227
H1	65094	6885	36,92,95,103	0.006805389477349433	0.02493313044309694	0.7848959635243102	-0.10505120125482943	0.1186619802095283
H1	65094	6885	36,92,95,113	-0.012283931263368464	0.024919188345578373	0.6220492839556796	-0.1240779740736311	0.09951011154689417
H1	65094	6885	36,92,103,113	-0.015241630734365297	0.024909924896259022	0.5406262946313931	-0.1269941152709227	0.09651085380219208
H1	65094	6885	36,95,103,113	0.023484387465866785	0.024913237772368035	0.34586543167937744	-0.08828295950555083	0.1352517344372844
H1	65094	6885	57,64,65,66	0.027600011876293906	0.024923599317661773	0.2681322258974356	-0.08421381971661637	0.13941384346920419
H1	65094	6885	57,64,65,79	0.0924813392093845	0.02491753403797772	0.00020622936696295112	-0.01930528194122516	0.20426796035999417
H1	65094	6885	57,64,65,82	-0.3662148349503446	0.024906068304124666	7.454850696701265e-49	-0.4779500177987334	-0.25447965210195583
H1	65094	6885	57,64,65,83	-0.5014103482767797	0.02490228958761922	7.365322973279464e-90	-0.6131285788075841	-0.38969211774597523
H1	65094	6885	57,64,65,84	-0.046753388479975566	0.02493598676747451	0.060806480982798165	-0.15862279343568844	0.06511601647573731
H1	65094	6885	57,64,65,85	-0.01887508811276284	0.024931207330656326	0.4490009230072364	-0.13072305125597158	0.0929728750304459
H1	65094	6885	57,64,65,92	0.017138976882339063	0.02492125868886513	0.49162860656773	-0.09466435403325114	0.12894230779792926
H1	65094	6885	57,64,65,95	0.006862029149502624	0.024925624585390067	0.7830865967710758	-0.10496088832790675	0.118684946626912
H1	65094	6885	57,64,65,103	-0.025597460545903172	0.024918576290126348	0.30430980448572664	-0.13738875751418825	0.0861938364223819
H1	65094	6885	57,64,65,113	0.07502584148786928	0.02490570827149883	0.002593060519089488	-0.03670772615932483	0.1867594091350634
H1	65094	6885	57,64,66,79	0.09951237623979056	0.024917436416692012	6.513429335137134e-05	-0.012273806956017277	0.2112985594355984
H1	65094	6885	57,64,66,82	0.13341545702149826	0.02490326997357828	8.477269855045728e-08	0.021692828221040808	0.24513808582195573
H1	65094	6885	57,64,66,83	0.0029178509497614913	0.02489965072152897	0.9067143228728538	-0.10878854093266595	0.11462424283218893
H1	65094	6885	57,64,66,84	0.014948581510326665	0.024936529070869448	0.5488650396903941	-0.09692325636126248	0.12682041938191582
H1	65094	6885	57,64,66,85	0.0518513118884254	0.024931303533310432	0.03755123962070361	-0.05999708284523013	0.16369970662208094
H1	65094	6885	57,64,66,92	0.016562764338575064	0.024920402283321434	0.5062919304729037	-0.09523672451616279	0.1283622531933129
H1	65094	6885	57,64,66,95	-0.0009994361711394006	0.024923975106569397	0.9680140265131829	-0.11281495365207475	0.11081608130979595
H1	65094	6885	57,64,66,103	-0.01055301898968286	0.0249161537569548	0.6719019716485566	-0.12233344783604785	0.10122740985668213
H1	65094	6885	57,64,66,113	-0.003098038730656172	0.024907003478978795	0.9010114795874735	-0.11483741701977229	0.10864133955845995
H1	65094	6885	57,64,79,82	0.06751117220547842	0.024897502390478502	0.006698625453319457	-0.04418558169797089	0.17920792610892772
H1	65094	6885	57,64,79,83	0.05977539215383798	0.02489387868813841	0.01634414071423554	-0.05190510486640462	0.17145588917408058
H1	65094	6885	57,64,79,84	-0.010391326330326245	0.024927210915402113	0.6767773852152665	-0.1222213605020203	0.10143870784136781
H1	65094	6885	57,64,79,85	0.020705216367326695	0.024921193147612784	0.4060744074073498	-0.09109782051294146	0.13250825324759485
H1	65094	6885	57,64,79,92	0.008050260348177796	0.024912343222334675	0.7465877720841247	-0.1037130734361593	0.1198135941325149
H1	65094	6885	57,64,79,95	-0.0362787387014436	0.024918172285674632	0.1454215352759971	-0.1480682231993406	0.07551074579645341
H1	65094	6885	57,64,79,103	0.010227397856771403	0.024910645305278003	0.681394257467246	-0.10152831862440599	0.1219831143379488
H1	65094	6885	57,64,79,113	0.056116988098256826	0.024897973516155903	0.024207564656442537	-0.05558187939907917	0.1678158555955928
H1	65094	6885	57,64,82,83	-0.2709216418717594	0.024893705398910945	1.4745500611610684e-27	-0.382601361470882	-0.15924192227263678
H1	65094	6885	57,64,82,84	-0.09460801066058555	0.024914891902767362	0.00014646012453030006	-0.2063827784966843	0.017166757175513192
H1	65094	6885	57,64,82,85	-0.07672451438552064	0.024910260538558604	0.002070715708405674	-0.18847850470184452	0.035029475930803244
H1	65094	6885	57,64,82,92	0.015521988311363533	0.02489959884863233	0.5330352648767491	-0.09618417085558588	0.12722814747831296
H1	65094	6885	57,64,82,95	-0.02227050100066219	0.02490337920405446	0.37117779226707204	-0.1339936198378079	0.08945261783648349
H1	65094	6885	57,64,82,103	-0.043537307615507226	0.02489873269056171	0.08036973977375148	-0.15523958096919963	0.06816496573818517
H1	65094	6885	57,64,82,113	-0.009711559654857094	0.024888474167370306	0.6963878008901047	-0.12136781057134466	0.10194469126163047
H1	65094	6885	57,64,83,84	-0.0612690955355808	0.02491179439103042	0.013918232433074305	-0.17302996711812094	0.05049177604695934
H1	65094	6885	57,64,83,85	-0.04578671763815434	0.024908323814035762	0.06603663196617518	-0.1575320192981217	0.06595858402181301
H1	65094	6885	57,64,83,92	-0.01719767768136571	0.02489663151528746	0.48971709891377335	-0.12889052460931327	0.09449516924658186
H1	65094	6885	57,64,83,95	-0.0023686189535800928	0.024900514124045914	0.9242172225884153	-0.11407888428712493	0.10934164637996474
H1	65094	6885	57,64,83,103	-0.06023365906175315	0.02489546512159909	0.015546481844847415	-0.17192127324037826	0.051453955116871966
H1	65094	6885	57,64,83,113	0.059003861060577645	0.024886556322053752	0.01774744202066217	-0.052643785896645715	0.170651508017801
H1	65094	6885	57,64,84,85	0.02424093196038113	0.024947006246582568	0.3312053309020916	-0.0876779092812199	0.13615977320198216
H1	65094	6885	57,64,84,92	0.05555274407644473	0.024931240929108683	0.02586843809808886	-0.056295369798271364	0.16740085795116083
H1	65094	6885	57,64,84,95	-0.031180421341625575	0.024936612230591577	0.21116315594514437	-0.14305263228963305	0.08069178960638192
H1	65094	6885	57,64,84,103	-0.024307264793473005	0.02493014585356001	0.32955689856766934	-0.13615046587082705	0.08753593628388104
H1	65094	6885	57,64,84,113	0.002831222385222265	0.024916078952645304	0.9095312315442362	-0.10894887086930632	0.11461131563975085
H1	65094	6885	57,64,85,92	-0.013553771160140698	0.024925828577149905	0.5866058871585931	-0.12537760379831758	0.09827006147803619
H1	65094	6885	57,64,85,95	0.031950465711292786	0.02493172553773075	0.20001673644176557	-0.07989982224535126	0.14380075366793682
H1	65094	6885	57,64,85,103	-0.021296423569424183	0.024924130868895993	0.3928592198148293	-0.13311263984118554	0.09051979270233719
H1	65094	6885	57,64,85,113	0.04418505717310972	0.024911636878971254	0.07612275161127358	-0.06757510776884319	0.15594522211506262
H1	65094	6885	57,64,92,95	-0.004008246542377969	0.024920937976093304	0.8722211513220586	-0.11581013865599574	0.1077936455712398
H1	65094	6885	57,64,92,103	-0.07398140657321584	0.02491269978795232	0.0029828384200008243	-0.18574634000483564	0.03778352685840396
H1	65094	6885	57,64,92,113	-0.02002801292021661	0.024902597169214707	0.4212535934098274	-0.1317476233430776	0.09169159750264438
H1	65094	6885	57,64,95,103	-0.031071803899179185	0.0249205786625477	0.21246369530798304	-0.1428720840375856	0.08072847623922724
H1	65094	6885	57,64,95,113	0.019277901996007207	0.02490542222007621	0.4389076934138436	-0.09245438234915705	0.13101018634117145
H1	65094	6885	57,64,103,113	-0.0417971083767541	0.024898067142169564	0.09321023107602247	-0.15349639590504915	0.06990217915154094
H1	65094	6885	57,65,66,79	0.12423698950049955	0.02491141795306902	6.145224540991446e-07	0.012477806717810708	0.2359961722831884
H1	65094	6885	57,65,66,82	0.4739585883971654	0.024898663742503633	1.5242118120246199e-80	0.36225662436262296	0.5856605524317079
H1	65094	6885	57,65,66,83	0.39479645267853325	0.024894914780407073	1.612940557736663e-56	0.2831113074754593	0.5064815978816072
H1	65094	6885	57,65,66,84	-0.010049037492160906	0.024926037535356584	0.6868362482538799	-0.12187380757189403	0.10177573258757222
H1	65094	6885	57,65,66,85	-0.06999790881782988	0.024919652158610642	0.004972084307393165	-0.18179403241552694	0.04179821477986716
H1	65094	6885	57,65,66,92	-0.024405898210479504	0.02491481693614273	0.3273006874749852	-0.1361803297265534	0.08736853330559438
H1	65094	6885	57,65,66,95	-0.032163604262564094	0.024916495537426978	0.1967587907747383	-0.1439455664261547	0.07961835790102649
H1	65094	6885	57,65,66,103	-0.09113600384321374	0.024908784134590824	0.0002536327171325296	-0.20288337062244283	0.020611362936015343
H1	65094	6885	57,65,66,113	0.021540617452803446	0.024900489385430526	0.38700501240685103	-0.09016953689679642	0.1332507718024033
H1	65094	6885	57,65,79,82	-0.00832613099175078	0.024895112733572238	0.73804241580777	-0.12001216426486591	0.10335990228136435
H1	65094	6885	57,65,79,83	0.04525723499416484	0.024891478701468333	0.06904147942546333	-0.06641249505370218	0.15692696504203185
H1	65094	6885	57,65,79,84	-0.009544739670071634	0.024917990022312753	0.7016869589492571	-0.12133340648651779	0.10224392714637452
H1	65094	6885	57,65,79,85	0.06452832097280903	0.024911222603250984	0.009590748478712174	-0.04722998541913957	0.17628662736475764
H1	65094	6885	57,65,79,92	-0.0026192730351801696	0.024907725847361225	0.9162499583326684	-0.11436189205913685	0.10912334598877652
H1	65094	6885	57,65,79,95	0.011975929923518702	0.024911737153614683	0.6307070598094151	-0.09978468487689769	0.1237365447239351
H1	65094	6885	57,65,79,103	-0.023604193047166322	0.024903404208479904	0.3432199518050508	-0.13532742406075088	0.08811903796641825
H1	65094	6885	57,65,79,113	-0.028160073704964206	0.024893246399886847	0.25796149534364843	-0.13983773411356107	0.08351758670363266
H1	65094	6885	57,65,82,83	0.16512481754027922	0.02489323724420126	3.3108152230947304e-11	0.05344719820649958	0.27680243687405887
H1	65094	6885	57,65,82,84	-0.0299050641591867	0.024907909769061095	0.22990150705551127	-0.14164850830433529	0.0818383799859619
H1	65094	6885	57,65,82,85	-0.07445738480997455	0.024902297315935285	0.002791118090493112	-0.18617565001204056	0.03726088039209147
H1	65094	6885	57,65,82,92	-0.04247947437083399	0.024897543265783573	0.08798152057970747	-0.1541764116516687	0.06921746291000072
H1	65094	6885	57,65,82,95	-0.08705914627455892	0.024899752801426072	0.00047195713095457884	-0.19876599611429333	0.024647703565175483
H1	65094	6885	57,65,82,103	-0.028066853284304277	0.024894331171159207	0.25956133692986866	-0.13974938026256545	0.08361567369395688
H1	65094	6885	57,65,82,113	-0.07042590788697145	0.024885833071454623	0.004656978285179172	-0.18207031015149777	0.04121849437755486
H1	65094	6885	57,65,83,84	-0.016102949302544967	0.024904264489250896	0.5178972576922348	-0.1278300397622723	0.09562414115718236
H1	65094	6885	57,65,83,85	-0.12865377024843871	0.024899819750810976	2.388487791712219e-07	-0.24036092044074875	-0.01694662005612868
H1	65094	6885	57,65,83,92	-0.02867482378254871	0.024894400448515108	0.24938400414135142	-0.14035766155727658	0.08300801399217918
H1	65094	6885	57,65,83,95	-0.05141542575602488	0.024896297179552735	0.03891004448971864	-0.16310677276580005	0.06027592125375028
H1	65094	6885	57,65,83,103	-0.05476674424474948	0.02489068260343241	0.02779017141965617	-0.16643290278712947	0.0568994142976305
H1	65094	6885	57,65,83,113	-0.07919441575926167	0.024883843450323295	0.0014605411961296866	-0.19082989205931244	0.0324410605407891
H1	65094	6885	57,65,84,85	-0.017567241949146273	0.024931198283643357	0.48104404963746217	-0.1294151645050718	0.09428068060677924
H1	65094	6885	57,65,84,92	-0.02362916319584829	0.02492226249323036	0.3430750063868856	-0.13543699744223014	0.08817867105053358
H1	65094	6885	57,65,84,95	-0.006284124027660987	0.024925300380026036	0.800950525832901	-0.1181055870344093	0.10553733897908733
H1	65094	6885	57,65,84,103	0.020765358270191853	0.024918558562959627	0.40466260688715217	-0.09102585916935385	0.13255657570973756
H1	65094	6885	57,65,84,113	-0.0461398078384776	0.02490597712853675	0.06395056150277557	-0.15787458164916268	0.06559496597220749
H1	65094	6885	57,65,85,92	-0.023648599169348805	0.02491577162452113	0.34255246161175923	-0.13542731366895994	0.08813011533026233
H1	65094	6885	57,65,85,95	-0.017788885074222327	0.02491966255262084	0.4753231982833307	-0.12958505530218697	0.09400728515374232
H1	65094	6885	57,65,85,103	-0.02292969982287313	0.024912154762402775	0.3573559962775076	-0.13469218812631403	0.08883278848056778
H1	65094	6885	57,65,85,113	-0.04777931424721604	0.024901151626292865	0.05501969815944755	-0.15949243958376333	0.06393381108933124
H1	65094	6885	57,65,92,95	-0.01743902077341597	0.024915458538796967	0.48397522509383917	-0.12921633068799948	0.09433828914116756
H1	65094	6885	57,65,92,103	-0.017840943891181293	0.024906696508260388	0.47380213033906393	-0.12957894502879636	0.09389705724643378
H1	65094	6885	57,65,92,113	-0.007530236144777547	0.024897328673515403	0.7623089278904011	-0.1192262107081721	0.10416573841861701
H1	65094	6885	57,65,95,103	-0.008264757529743316	0.024911897132726585	0.7400720931174873	-0.12002609003859534	0.1034965749791087
H1	65094	6885	57,65,95,113	-0.027170387315671785	0.02489927455612453	0.27518412342351467	-0.13887509162101025	0.0845343169896667
H1	65094	6885	57,65,103,113	-0.027524442455131748	0.024890658393596422	0.26881153611000475	-0.13919049238581044	0.08414160747554694
H1	65094	6885	57,66,79,82	0.03632772722381772	0.024892328716789928	0.14446195979333032	-0.07534581621668208	0.1480012706643175
H1	65094	6885	57,66,79,83	0.01626020194222355	0.024888847999353467	0.5135572494232445	-0.09539772608301049	0.1279181299674576
H1	65094	6885	57,66,79,84	0.06308292277494865	0.024917958570864776	0.011356147842494422	-0.048705602942017354	0.17487144849191466
H1	65094	6885	57,66,79,85	0.07107081445773167	0.02491164549974675	0.004333543378172711	-0.04068938915929089	0.18283101807475421
H1	65094	6885	57,66,79,92	0.035529950316827985	0.024906308611946856	0.15371667887704715	-0.07620631061574992	0.1472662112494059
H1	65094	6885	57,66,79,95	-0.006288809718654309	0.024909914460845024	0.8006847842243187	-0.11804124743919572	0.1054636280018871
H1	65094	6885	57,66,79,103	-0.017717719543724364	0.024901186242055687	0.47676422879502767	-0.1294310001757017	0.09399556108825298
H1	65094	6885	57,66,79,113	-0.036612392473225425	0.024894366284030744	0.14137497670993435	-0.14829507697707728	0.07507029203062643
H1	65094	6885	57,66,82,83	0.07296495917394208	0.024888342026064422	0.003372517944588577	-0.038690698921840336	0.1846206172697245
H1	65094	6885	57,66,82,84	-0.0644470361474262	0.024905616376517725	0.009665690347765241	-0.1761801915295293	0.04728611923467689
H1	65094	6885	57,66,82,85	0.04078120513731742	0.024900976454695765	0.10148235403389813	-0.07093113433330384	0.15249354460793868
H1	65094	6885	57,66,82,92	0.054836297550944435	0.02489381400608134	0.027612174476803315	-0.056843909288552444	0.1665165043904413
H1	65094	6885	57,66,82,95	-0.016770779718264794	0.024895294344920174	0.5005348796406268	-0.1284576277477245	0.09491606831119491
H1	65094	6885	57,66,82,103	0.03755262754263211	0.024889261747433073	0.1313583128968463	-0.07410715666547124	0.14921241175073546
H1	65094	6885	57,66,82,113	0.013301091813604865	0.02488498787275639	0.5929958621987246	-0.09833951866692979	0.12494170229413952
H1	65094	6885	57,66,83,84	-0.019813232626418875	0.024902092604519185	0.42624148063598644	-0.1315305794391498	0.09190411418631207
H1	65094	6885	57,66,83,85	0.05592986046104231	0.024898585034161435	0.02468809808957419	-0.05577175046714471	0.16763147138922935
H1	65094	6885	57,66,83,92	0.01093491991815232	0.024890924113508114	0.6604359974080146	-0.10073232210204275	0.12260216193834739
H1	65094	6885	57,66,83,95	0.004681890825097179	0.024891927515960276	0.8508077578226666	-0.10698985272280165	0.116353634372996
H1	65094	6885	57,66,83,103	0.030019882344312743	0.024885711304596034	0.22770288716654752	-0.08162397364201167	0.14166373833063717
H1	65094	6885	57,66,83,113	-0.0095243035540864	0.024883209707043108	0.7018989350109688	-0.12115693671484974	0.10210832960667694
H1	65094	6885	57,66,84,85	0.033292141541118925	0.02493280703961043	0.18179174197009593	-0.07856299831783269	0.14514728140007055
H1	65094	6885	57,66,84,92	-0.017261773999886487	0.024920777501480473	0.48852197618288185	-0.12906294618212094	0.09453939818234797
H1	65094	6885	57,66,84,95	0.03778898533056052	0.024923571189123663	0.129475570525922	-0.07402472007031853	0.14960269073143956
H1	65094	6885	57,66,84,103	0.022637133876876492	0.024916225124684978	0.363602120308937	-0.08914361514392484	0.1344178828976778
H1	65094	6885	57,66,84,113	-0.036646622904626724	0.024908031502156588	0.14122152864034976	-0.14839061317650706	0.07509736736725361
H1	65094	6885	57,66,85,92	-0.02659085775782799	0.02491633354813432	0.28588330257276856	-0.13837209319478258	0.0851903776791266
H1	65094	6885	57,66,85,95	-0.004128099557199505	0.024918805985297318	0.8684235176046243	-0.1159204269985249	0.10766422788412588
H1	65094	6885	57,66,85,103	0.024355405850606526	0.02491096012476959	0.3282275768112016	-0.08740172299373583	0.13611253469494888
H1	65094	6885	57,66,85,113	-0.036132855367891126	0.02490364029809775	0.14681126661921115	-0.14785714554168905	0.07559143480590678
H1	65094	6885	57,66,92,95	-0.004287835576462645	0.024912691380202284	0.8633481069679735	-0.1160527312887011	0.1074770601357758
H1	65094	6885	57,66,92,103	0.032971278116545655	0.024902760696382985	0.1855079378194719	-0.07874906593226647	0.14469162216535777
H1	65094	6885	57,66,92,113	0.020412633931587765	0.024898650161312392	0.41231698846084996	-0.0912892691741534	0.13211453703732895
H1	65094	6885	57,66,95,103	0.0219017417640624	0.0249080988850171	0.3792411687054771	-0.08984255080507933	0.13364603433320413
H1	65094	6885	57,66,95,113	-0.01909734563476051	0.024898814722057207	0.44308570708923356	-0.13079998700334938	0.09260529573382838
H1	65094	6885	57,66,103,113	0.014560309798337112	0.024890155307068524	0.5585616292035491	-0.09710348315366085	0.12622410275033508
H1	65094	6885	57,79,82,83	0.027405580204687086	0.024883933340432162	0.27075485242454184	-0.08423029936606975	0.1390414597754439
H1	65094	6885	57,79,82,84	0.023407738767425856	0.024897582904673473	0.3471388367091638	-0.08828937634391011	0.1351048538787618
H1	65094	6885	57,79,82,85	0.055433780170005886	0.02489202357371971	0.025953114423125746	-0.05623839431830406	0.16710595465831585
H1	65094	6885	57,79,82,92	0.036657966662999475	0.024886453371816625	0.14075405020802442	-0.07498921843234231	0.14830515175834125
H1	65094	6885	57,79,82,95	-0.0047757415338315345	0.024890634288964923	0.8478454766392787	-0.116441683324784	0.10689020025712093
H1	65094	6885	57,79,82,103	-0.008535062463610021	0.024884812860847167	0.731612648354706	-0.12017488779462053	0.10310476286740049
H1	65094	6885	57,79,82,113	-0.02354227223831007	0.024876879676513305	0.3439732657078217	-0.13514650721474153	0.08806196273812138
H1	65094	6885	57,79,83,84	0.024387308448827083	0.024894331515231363	0.3272713852415632	-0.0872952200730324	0.1360698369706866
H1	65094	6885	57,79,83,85	0.010163539509101871	0.02488957164872628	0.683021690898139	-0.10149763499783301	0.12182471401603676
H1	65094	6885	57,79,83,92	0.022578283231428853	0.024883709149901914	0.3642244409185822	-0.0890565905615559	0.1342131570244136
H1	65094	6885	57,79,83,95	0.004518752575538687	0.024887324947977723	0.8559220565910949	-0.10713234264004116	0.11616984779111854
H1	65094	6885	57,79,83,103	-0.027390500706968413	0.02488130665542661	0.2709679984163722	-0.13901459627690277	0.08423359486296596
H1	65094	6885	57,79,83,113	-0.014972405074452855	0.02487528190706355	0.5472437739973868	-0.12656947203626884	0.09662466188736311
H1	65094	6885	57,79,84,85	0.08363652471770244	0.024920603426651523	0.0007909492339726549	-0.028163866518996786	0.19543691595440166
H1	65094	6885	57,79,84,92	0.031074177329183827	0.024911182222677474	0.21225634680855357	-0.08068394790487547	0.14283230256324314
H1	65094	6885	57,79,84,95	0.007263155699120616	0.024916003697549878	0.7706656668472172	-0.10451659994122717	0.1190429113394684
H1	65094	6885	57,79,84,103	-0.012349405788163959	0.024908532040564393	0.6200443200207313	-0.1240956416071871	0.09939683003085918
H1	65094	6885	57,79,84,113	-0.046874117760722145	0.0248971845738669	0.05974499253340469	-0.15856944585513666	0.06482121033369236
H1	65094	6885	57,79,85,92	-0.039934209225905654	0.024904749912269163	0.10883467103056016	-0.15166347742115682	0.07179505896934552
H1	65094	6885	57,79,85,95	-0.036729444504472186	0.024909873213469536	0.1403541925249749	-0.1484816971784223	0.07502280816947794
H1	65094	6885	57,79,85,103	-0.05173792601569149	0.024902444216613046	0.03774833899607697	-0.16345685025289264	0.05998099822150965
H1	65094	6885	57,79,85,113	-0.008517650389266607	0.024891759139608328	0.7322109799594612	-0.12018863855649906	0.10315333777796584
H1	65094	6885	57,79,92,95	-0.035972165645701604	0.024905796184581608	0.14865181258282362	-0.147706127694142	0.07576179640273878
H1	65094	6885	57,79,92,103	-0.011639211484113066	0.024896757598086818	0.6401445941966102	-0.12333262405270966	0.10005420108448353
H1	65094	6885	57,79,92,113	0.013017301578397422	0.0248874036863277	0.6009429855096667	-0.09863414687816066	0.1246687500349555
H1	65094	6885	57,79,95,103	-0.02567846965538395	0.024903389479344226	0.30248720202002743	-0.13740163459018612	0.0860446952794182
H1	65094	6885	57,79,95,113	-0.04086743365988685	0.024890999731646008	0.10062528247435744	-0.15253501492296687	0.07080014760319317
H1	65094	6885	57,79,103,113	-0.04133469522337724	0.02488258934128205	0.09668078672177075	-0.1529645452599277	0.07029515481317324
H1	65094	6885	57,82,83,84	0.09880342630856798	0.024895897902494458	7.236366293773169e-05	-0.012886129439151336	0.2104929820562873
H1	65094	6885	57,82,83,85	0.0216953512961906	0.024892105284685228	0.3834435480576681	-0.0899771897690339	0.1333678923614151
H1	65094	6885	57,82,83,92	-0.028615289157678803	0.024885271100411086	0.2501944876265824	-0.14025717027207663	0.083026591956719
H1	65094	6885	57,82,83,95	-0.02273278118836941	0.02488649976956916	0.3610053091566523	-0.13438017443625055	0.08891461205951175
H1	65094	6885	57,82,83,103	-0.0008819525389134331	0.024883627370172058	0.9717265503466528	-0.11251645944648869	0.11075255436866183
H1	65094	6885	57,82,83,113	-0.10459202110244037	0.02487986315097409	2.6276642029833588e-05	-0.21620964073117135	0.007025598526290616
H1	65094	6885	57,82,84,85	-0.023504228931038817	0.024911351893768786	0.34542157041668886	-0.13526311535430632	0.08825465749222869
H1	65094	6885	57,82,84,92	-0.05582749051975622	0.024900232399924258	0.024962087540857075	-0.16753649196468318	0.05588151092517073
H1	65094	6885	57,82,84,95	-0.02821093785046569	0.024902914681061088	0.25728746614739373	-0.13993197271510444	0.08351009701417306
H1	65094	6885	57,82,84,103	0.03824259583767953	0.024898343833472364	0.12455623057943657	-0.07345793300068233	0.14994312467604137
H1	65094	6885	57,82,84,113	0.020181630752475366	0.024889592912350607	0.41745733951579456	-0.09147963914867924	0.13184290065362997
H1	65094	6885	57,82,85,92	-0.012557667332125266	0.024895181914822328	0.6139670564418873	-0.12424401097055114	0.09912867630630061
H1	65094	6885	57,82,85,95	0.015719660613102926	0.024897825282493836	0.5278031891268828	-0.09597854186897924	0.1274178630951851
H1	65094	6885	57,82,85,103	-0.009630137734031319	0.02489308094145041	0.6988612563811905	-0.12130705585249939	0.10204678038443675
H1	65094	6885	57,82,85,113	0.02591034592386099	0.024884878342928837	0.2977831335704352	-0.08572977317701634	0.13755046502473833
H1	65094	6885	57,82,92,95	-0.0413543998911306	0.024892350144621656	0.09665263935736475	-0.1530280394625278	0.07031923968026658
H1	65094	6885	57,82,92,103	0.04808601613269798	0.024885857211045016	0.05333192384013845	-0.06355849442838937	0.15973052669378532
H1	65094	6885	57,82,92,113	-0.0023248617435869257	0.024879721026623305	0.9255511232128466	-0.11394184376504372	0.10929212027786987
H1	65094	6885	57,82,95,103	0.01861397886419458	0.02489081453160673	0.45456860876895144	-0.09305277154272623	0.1302807292711154
H1	65094	6885	57,82,95,113	-0.009236207702726706	0.02488085070739344	0.710476875699549	-0.1208582577696843	0.10238584236423089
H1	65094	6885	57,82,103,113	0.031012323032711397	0.02487527589979359	0.21250786764561885	-0.08058471697890918	0.14260936304433197
H1	65094	6885	57,83,84,85	0.021018048016304802	0.02490909881515796	0.3987902427420723	-0.09073073050283756	0.13276682653544716
H1	65094	6885	57,83,84,92	-0.05786637167756625	0.024897531163544904	0.020119212897842405	-0.16956325466457048	0.05383051130943797
H1	65094	6885	57,83,84,95	0.010430036265996367	0.024900308283935215	0.6753113932108565	-0.10127930561459211	0.12213937814658485
H1	65094	6885	57,83,84,103	0.05753373177512222	0.024895504318078635	0.020835840292876513	-0.05415405824923476	0.1692215217994792
H1	65094	6885	57,83,84,113	-0.01157573562246661	0.0248878130558285	0.6418496807315355	-0.12322902061843613	0.10007754937350291
H1	65094	6885	57,83,85,92	-0.00873582404187645	0.02489317640545647	0.7256402764447357	-0.12041317043702161	0.10294152235326871
H1	65094	6885	57,83,85,95	0.018713811079451803	0.024896305878625617	0.452252458071256	-0.0929775749566557	0.1304051971155593
H1	65094	6885	57,83,85,103	0.00525192987587908	0.024891112755191524	0.8328909855230578	-0.10641615844059732	0.11692001819235548
H1	65094	6885	57,83,85,113	0.021702097495904127	0.024884145776724705	0.38314352639997407	-0.0899347351200183	0.13333893011182657
H1	65094	6885	57,83,92,95	0.0016260472247278113	0.024889553200577775	0.9479110744624968	-0.1100350445189535	0.11328713896840913
H1	65094	6885	57,83,92,103	0.009143981035629745	0.024883007535115534	0.7132631400760794	-0.10248774512861297	0.12077570719987246
H1	65094	6885	57,83,92,113	-0.024471526644328057	0.024878540908666806	0.32529666533447943	-0.13608321434578052	0.0871401610571244
[truncated: 5,988 more rows]
