# Supplementary material for: Binding affinity landscapes constrain the evolution of broadly neutralizing anti-influenza antibodies
Source: eLife. 2021 Sep 7;10:e71393. doi: 10.7554/eLife.71393 (PMC8476123; doi:10.7554/eLife.71393)
Supplement: Figure 2—source data 2. — Coefficients are reported with standard errors, p-values, and confidence intervals (95% with Bonferroni correction by the number of parameters). [file elife-71393-fig2-data2.csv]

Antigen	Num_Sequences	Num_Parameters	Term	Coefficient	StdError	pValue	CI_Lower	CI_Upper
H1	1887	562	Intercept	6.868699594931859
H1	1887	562	29	0.8073033393322746	0.0792868565216999	1.7023471725158532e-23	0.49562747642827665	1.1189792022362726
H1	1887	562	35	0.5736129620637076	0.08639290469385687	4.5767280636796355e-11	0.23400329281327892	0.9132226313141363
H1	1887	562	65	0.07351089725361351	0.07922994947831333	0.3536714606241952	-0.23794126461554813	0.3849630591227752
H1	1887	562	66	-0.05492991079546723	0.07908748523720828	0.4874615137713525	-0.3658220471165454	0.255962225525611
H1	1887	562	69	0.02455746490179507	0.08011362692172636	0.7592470712400705	-0.29036842441460337	0.3394833542181935
H1	1887	562	82	0.08505559814348385	0.07887815039905939	0.281088874153138	-0.22501364496201998	0.39512484124898767
H1	1887	562	83	1.34160851322306	0.09788656140624764	4.417675835120013e-40	0.9568173910696991	1.7263996353764208
H1	1887	562	84	0.0629643343612902	0.08327512179842392	0.44972353693626066	-0.2643893606090201	0.39031802933160054
H1	1887	562	85	0.3199521813668576	0.07900372338721369	5.422525054891151e-05	0.00938931206456145	0.6305150506691537
H1	1887	562	87	0.2425410938853128	0.07983263526207882	0.0024271667588777247	-0.07128021994617528	0.5563624077168009
H1	1887	562	112.1	0.06319712451346066	0.07958049400061681	0.4272629296224737	-0.2496330244681716	0.3760272734950929
H1	1887	562	29,35	0.9758189957347667	0.08238830812209966	7.79902471413927e-31	0.6519513567128062	1.299686634756727
H1	1887	562	29,65	0.1866425695992177	0.08002075005622966	0.01982736125073778	-0.12791822166099054	0.501203360859426
H1	1887	562	29,66	0.48549021391961145	0.08004030131317455	1.7126185936073733e-09	0.17085256685824668	0.8001278609809762
H1	1887	562	29,69	0.04625274679194913	0.08032406536914626	0.5648300636568819	-0.26950037401734905	0.3620058676012473
H1	1887	562	29,82	0.2525742081071322	0.07960238243652985	0.0015436585858761515	-0.060341984103480184	0.5654904003177446
H1	1887	562	29,83	0.18083422260054677	0.08868717536902188	0.04164693336915661	-0.16779420239058512	0.5294626475916786
H1	1887	562	29,84	-0.32482943328894076	0.08378097476195034	0.00011087624571953368	-0.6541716313457178	0.0045127647678362415
H1	1887	562	29,85	0.38341259919847925	0.07971578846351614	1.6841381125289052e-06	0.07005060899725296	0.6967745893997055
H1	1887	562	29,87	0.3057741069859337	0.08061065765057426	0.00015540403466257171	-0.011105605298097121	0.6226538192699645
H1	1887	562	29,112.1	0.4747769535704622	0.08030855250621333	4.296190183322243e-09	0.15908481367468286	0.7904690934662415
H1	1887	562	35,65	-0.11145251484478852	0.0825272290386365	0.1770882336008697	-0.4358662506403698	0.21296122095079278
H1	1887	562	35,66	0.3844028367118312	0.0825607372732078	3.5478753936817196e-06	0.059857380371602764	0.7089482930520596
H1	1887	562	35,69	0.1411761151556576	0.08295072662416755	0.08900355942451806	-0.18490238553537675	0.4672546158466919
H1	1887	562	35,82	0.7203178667694757	0.08244986264418808	7.130755360037066e-18	0.39620825751904115	1.0444274760199104
H1	1887	562	35,83	-0.04125134499719618	0.09120336583249421	0.6511264191570731	-0.39977089026144563	0.31726820026705327
H1	1887	562	35,84	-0.5383892658895503	0.08649799089106223	6.477773496843202e-10	-0.8784120279605314	-0.19836650381856918
H1	1887	562	35,85	0.4799743096064932	0.08255910922652614	7.647652453319169e-09	0.15543525310195777	0.8045133661110286
H1	1887	562	35,87	0.5304842792588266	0.0830521288742489	2.3305851587103863e-10	0.2040071673076036	0.8569613912100496
H1	1887	562	35,112.1	0.33944479292889207	0.08251673902687312	4.134524543844605e-05	0.01507229326766718	0.6638172925901169
H1	1887	562	65,66	-0.012904849472487889	0.08082082763405261	0.8731635384746312	-0.33061073792027174	0.304801038975296
H1	1887	562	65,69	0.01688625786906628	0.08117678788019944	0.8352466428482743	-0.30221890684901553	0.3359914225871481
H1	1887	562	65,82	-0.15540680507467455	0.07997874414592686	0.05221547540005549	-0.46980247150946974	0.15898886136012066
H1	1887	562	65,83	0.24710640517006702	0.0917443693159419	0.0071614891433921255	-0.11353981953305611	0.6077526298731901
H1	1887	562	65,84	0.00809260278308803	0.08415529961817875	0.923405877980029	-0.32272106264784917	0.33890626821402525
H1	1887	562	65,85	-0.17106779767868835	0.08009489911634027	0.032877460887762895	-0.48592006817401007	0.14378447281663337
H1	1887	562	65,87	-0.06872169475189319	0.08098708298570506	0.3962842829002272	-0.3870811313722484	0.24963774186846202
H1	1887	562	65,112.1	0.030145983857885805	0.08065126193682814	0.7086263678885814	-0.28689334348103523	0.34718531119680685
H1	1887	562	66,69	0.07809043674960667	0.08051970660421175	0.33230817384262157	-0.2384317478545457	0.3946126213537591
H1	1887	562	66,82	0.05186129005296097	0.07993718053720623	0.5165958748663994	-0.2623709902396449	0.36609357034556683
H1	1887	562	66,83	0.26124102521035475	0.09043780165954683	0.003932198562636901	-0.09426909472566952	0.616751145146379
H1	1887	562	66,84	0.07042814442994924	0.08387873153558408	0.4012603537932389	-0.2592983345545079	0.40015462341440644
H1	1887	562	66,85	0.019180123058698442	0.08023385939167021	0.8111016650932751	-0.2962183989292775	0.33457864504667434
H1	1887	562	66,87	0.014778976654501688	0.08083289221923459	0.8549564770676834	-0.3029743375604539	0.33253229086945724
H1	1887	562	66,112.1	0.11379580889460275	0.08052061119499843	0.1578168996088413	-0.20272993164714617	0.4303215494363517
H1	1887	562	69,82	-0.081434014525553	0.08012400572251545	0.3096484024300883	-0.39640070280704803	0.23353267375594206
H1	1887	562	69,83	-0.10656083428360488	0.09018240967313734	0.23757076356520782	-0.46106701080157775	0.247945342234368
H1	1887	562	69,84	0.01778462883341969	0.0842115257308161	0.8327715199263526	-0.3132500609001923	0.3488193185670317
H1	1887	562	69,85	-0.022757603521505673	0.08025774002056545	0.7767945787236469	-0.3382500000297254	0.292734792986714
H1	1887	562	69,87	0.06978282675182555	0.08074736683551009	0.3876279738538395	-0.24763428801038417	0.3871999415140353
H1	1887	562	69,112.1	-0.14306519853860566	0.08065554280256475	0.07632915941655495	-0.46012135391915887	0.17399095684194754
H1	1887	562	82,83	-0.2274970331763519	0.08970869272867317	0.011328263946857393	-0.580141032986667	0.12514696663396319
H1	1887	562	82,84	0.05042177556463201	0.08394421956860862	0.5481704572507486	-0.27956213624158455	0.38040568737084857
H1	1887	562	82,85	-0.22664321421849964	0.08031759950400812	0.004846239503459574	-0.5423709177747402	0.08908448933774099
H1	1887	562	82,87	-0.1985895323253459	0.08018618772577935	0.013387929533253148	-0.5138006574577214	0.11662159280702958
H1	1887	562	82,112.1	-0.05958197313000144	0.07996707227801712	0.45635468800837753	-0.37393175756540786	0.25476781130540505
H1	1887	562	83,84	0.46568202973785994	0.0927606596417706	5.862804033566161e-07	0.10104077763474201	0.8303232818409778
H1	1887	562	83,85	0.07602845617517848	0.08977261037068962	0.3972035965789228	-0.2768668032650957	0.4289237156154527
H1	1887	562	83,87	-0.6423519206374183	0.09270047080853373	6.581365618940579e-12	-1.0067565710216733	-0.27794727025316346
H1	1887	562	83,112.1	-0.11204659287794663	0.08973376893258557	0.21201155813973835	-0.4647891670022858	0.24069598124639255
H1	1887	562	84,85	-0.4465722228785116	0.08407331081649655	1.2725884512217257e-07	-0.7770635911263619	-0.11608085463066137
H1	1887	562	84,87	-0.26111492369807	0.08442933655939298	0.0020248570100409205	-0.5930058256833047	0.07077597828716475
H1	1887	562	84,112.1	0.09735346533630312	0.08396073955528559	0.24645654836266753	-0.2326953863770883	0.42740231704969456
H1	1887	562	85,87	1.039454931612656	0.08029042052262912	3.489716192498389e-36	0.7238340683682372	1.3550757948570749
H1	1887	562	85,112.1	-0.09623716911048583	0.08032027142694703	0.23106593890946678	-0.411975375969848	0.21950103774887633
H1	1887	562	87,112.1	-0.13983820672955616	0.08084057169851211	0.08389847830694667	-0.4576217089029638	0.17794529544385146
H1	1887	562	29,35,65	-0.1034078874170428	0.070770779099443	0.14420686400015503	-0.3816071326875401	0.17479135785345454
H1	1887	562	29,35,66	-0.634954357765149	0.07090117072477778	1.1185043835058523e-18	-0.9136661712483936	-0.35624254428190444
H1	1887	562	29,35,69	-0.11233322541636387	0.07072004274276351	0.11242966941939873	-0.3903330265615369	0.16566657572880916
H1	1887	562	29,35,82	-1.0523531049077242	0.07062834301670835	1.5485705330054687e-46	-1.3299924353204187	-0.7747137744950297
H1	1887	562	29,35,83	-1.5356434756295303	0.07358373058697588	7.4552918728096595e-84	-1.8249004058764013	-1.2463865453826592
H1	1887	562	29,35,84	0.7545949326434829	0.07346474920737904	7.232817611410876e-24	0.4658057170441866	1.043384148242779
H1	1887	562	29,35,85	-1.006669547458357	0.07067695979787213	6.135103761200014e-43	-1.28449998996561	-0.7288391049511038
H1	1887	562	29,35,87	-0.8066754547004595	0.07100668574560208	1.3186474352867058e-28	-1.0858020467057374	-0.5275488626951816
H1	1887	562	29,35,112.1	-0.5998664221574473	0.07090511016176303	6.970078001219904e-17	-0.8785937215292187	-0.321139122785676
H1	1887	562	29,65,66	-0.1637977017680191	0.07057841757575203	0.020449338631949553	-0.4412407757572209	0.1136453722211827
H1	1887	562	29,65,69	-0.029356836065164205	0.07049863442142758	0.6771722696305802	-0.30648628324961974	0.24777261111929133
H1	1887	562	29,65,82	-0.04931664427005783	0.07020773852941449	0.4825288948415086	-0.32530258252837	0.22666929398825436
H1	1887	562	29,65,83	-0.3343081666280859	0.07372548803420928	6.29584405682754e-06	-0.6241223440231958	-0.04449398923297604
H1	1887	562	29,65,84	-0.0036052459025116557	0.07318920994669804	0.960720114433835	-0.291311319344278	0.2841008275392547
H1	1887	562	29,65,85	0.1067254125133455	0.07026070629841989	0.12900321054524716	-0.1694687415304713	0.3829195665571623
H1	1887	562	29,65,87	-0.01122348122027328	0.07061595267582338	0.8737428026096024	-0.2888141053232915	0.26636714288274493
H1	1887	562	29,65,112.1	-0.09567137434723427	0.07052936793528573	0.17517893742298976	-0.37292163467616335	0.1815788859816948
H1	1887	562	29,66,69	-0.10326280573736785	0.07038877604568351	0.14260380838126027	-0.3799604007137857	0.17343478923904998
H1	1887	562	29,66,82	-0.06657674704361857	0.07026244830006524	0.343534524768196	-0.34277774887898393	0.20962425479174676
H1	1887	562	29,66,83	-0.5403901623497211	0.07363459999080824	3.7452177019640574e-13	-0.8298470597289822	-0.25093326497046015
H1	1887	562	29,66,84	0.032944972647714676	0.07303353767462127	0.6519957931581932	-0.25414915460450294	0.3200390998999323
H1	1887	562	29,66,85	-0.1740556128967818	0.07032597541057449	0.013448596088505101	-0.45050633918654454	0.10239511339298096
H1	1887	562	29,66,87	-0.19195602821840302	0.0706958830603475	0.006708885428727329	-0.46986085788665244	0.0859488014498464
H1	1887	562	29,66,112.1	-0.1942575933489767	0.07065874795148078	0.006054594302036131	-0.47201644526495007	0.0835012585669967
H1	1887	562	29,69,82	0.05184294314325341	0.0702465393975751	0.4606365089997678	-0.2242955209509402	0.32798140723744706
H1	1887	562	29,69,83	0.08654254020680979	0.07363156603138057	0.24006761850191893	-0.20290243070740877	0.37598751112102835
H1	1887	562	29,69,84	-0.0451811995383357	0.0728556135256471	0.5352675639501316	-0.3315759086890448	0.24121350961237337
H1	1887	562	29,69,85	-0.06467725240016994	0.07030789334187706	0.3577848690515846	-0.34105689825350727	0.2117023934531674
H1	1887	562	29,69,87	-0.09235781761635298	0.07056620903977465	0.1908253936707565	-0.36975289996920446	0.1850372647364985
H1	1887	562	29,69,112.1	-0.016001470188993172	0.07055002855920804	0.8206062731305563	-0.29333294722989217	0.2613300068519058
H1	1887	562	29,82,83	-0.2135948400709622	0.07498164104353515	0.004458669840139725	-0.5083469427452	0.0811572626032756
H1	1887	562	29,82,84	0.020284145097094475	0.07327902767241382	0.7819715084063221	-0.2677750009520955	0.30834329114628445
H1	1887	562	29,82,85	0.26179650947289307	0.07106173280217382	0.0002387859073389262	-0.01754647197711745	0.5411394909229036
H1	1887	562	29,82,87	-0.16440191850216157	0.07055528733266872	0.0199496202735998	-0.44175406773045806	0.11295023072613491
H1	1887	562	29,82,112.1	-0.18389982281340334	0.07030558677029212	0.009005076549901295	-0.4602704015562431	0.09247075592943643
H1	1887	562	29,83,84	-0.20186882024913377	0.07643021522897797	0.008358035138867854	-0.5023152539769022	0.0985776134786347
H1	1887	562	29,83,85	-0.4738388520371214	0.07501570972856898	3.644078593239343e-10	-0.7687248783813312	-0.17895282569291165
H1	1887	562	29,83,87	0.21413007451386037	0.07398933921929153	0.0038651354437079003	-0.07672129932712249	0.5049814483548433
H1	1887	562	29,83,112.1	-0.2982916651373029	0.0735700530191102	5.316214377649765e-05	-0.5874948289977389	-0.00908850127686689
H1	1887	562	29,84,85	0.561876704758024	0.07332284406321794	3.490308398063867e-14	0.27364531690215477	0.8501080926138932
H1	1887	562	29,84,87	0.4372015841366913	0.07347340741107712	3.4174971148230225e-09	0.14837833322275168	0.7260248350506309
H1	1887	562	29,84,112.1	-0.05398874629281103	0.07295348642351501	0.45940476130582086	-0.340768192854437	0.23279070026881493
H1	1887	562	29,85,87	-0.8781051397274556	0.07059152117020165	1.1206915733993604e-33	-1.1555997238191686	-0.6006105556357426
H1	1887	562	29,85,112.1	-0.12067618663443636	0.07038201360052279	0.0866545512016102	-0.3973471985046084	0.1559948252357357
H1	1887	562	29,87,112.1	-0.11781047402478412	0.07065386918143435	0.09566497878821682	-0.3955501475430906	0.15992919949352236
H1	1887	562	35,65,66	0.08130141607836416	0.07104663229791874	0.2526898472025974	-0.19798220543608508	0.3605850375928134
H1	1887	562	35,65,69	-0.10461868196004986	0.07088195571344058	0.14019317158645003	-0.3832549614203559	0.1740175975002562
H1	1887	562	35,65,82	0.13024803011000635	0.07076925876427749	0.06592415816624042	-0.1479452387377218	0.4084412989577345
H1	1887	562	35,65,83	-0.04108879268860738	0.0741846378816987	0.5797599143033834	-0.33270788367465187	0.2505302982974371
H1	1887	562	35,65,84	0.019120447412885988	0.07355004514271724	0.7949310563498982	-0.2700040656797781	0.30824496050555006
H1	1887	562	35,65,85	0.14347892620210898	0.07080773884144635	0.04293230725068809	-0.13486560745522777	0.4218234598594457
H1	1887	562	35,65,87	0.03246265747476851	0.07106693412713298	0.6478969417064716	-0.24690077033313806	0.3118260852826751
H1	1887	562	35,65,112.1	-0.009675593708718774	0.07092250965464085	0.891506143553041	-0.28847129031799823	0.26912010290056065
H1	1887	562	35,66,69	-0.04032438036940218	0.07091324577079043	0.5696942303794035	-0.31908366074124217	0.23843490000243783
H1	1887	562	35,66,82	-0.19932795140474915	0.0710080785279389	0.005071956303427824	-0.47846001842386565	0.07980411561436732
H1	1887	562	35,66,83	-0.21259551781471434	0.07426449101068336	0.004266831743735558	-0.5045285106752148	0.07933747504578606
H1	1887	562	35,66,84	-0.012166367773668946	0.07370179780770435	0.8689096660797073	-0.30188741911848194	0.2775546835711441
H1	1887	562	35,66,85	-0.2078696297676078	0.07105696973393387	0.003498786161966894	-0.487193887642629	0.07145462810741338
H1	1887	562	35,66,87	-0.09481201255962153	0.07122067675889757	0.1833381338609506	-0.37477980115975146	0.18515577604050842
H1	1887	562	35,66,112.1	0.029062550207187288	0.07104919255436633	0.6825703356971056	-0.25023113565049065	0.30835623606486523
H1	1887	562	35,69,82	-0.05457694401357782	0.07082075573667963	0.4410607713443834	-0.33297264695964846	0.2238187589324928
H1	1887	562	35,69,83	-0.09166986119869437	0.07410774238345341	0.21631336606584958	-0.3829866767279931	0.19964695433060436
H1	1887	562	35,69,84	-0.021368272608081343	0.07337044209323079	0.7709147623587642	-0.30978676785762965	0.267050222641467
H1	1887	562	35,69,85	-0.026428648732550075	0.0708627076485399	0.7092410891754231	-0.3049892642366806	0.25213196677158045
H1	1887	562	35,69,87	-0.1062558895567271	0.07103555781274608	0.13494060508337388	-0.38549597737752483	0.17298419826407063
H1	1887	562	35,69,112.1	0.008280371894311273	0.0708795224351112	0.9070178710242986	-0.2703463423725154	0.286907086161138
H1	1887	562	35,82,83	0.042854310821497155	0.0760174449984224	0.573024370654384	-0.2559695271390362	0.3416781487820305
H1	1887	562	35,82,84	0.3010539491067742	0.07419597674527183	5.248676142812228e-05	0.009390285158153766	0.5927176130553946
H1	1887	562	35,82,85	-0.0020007144262683754	0.07181727881590978	0.9777792832962254	-0.28431373991794656	0.2803123110654098
H1	1887	562	35,82,87	-0.17368904834672802	0.07116607041402652	0.014792491321098273	-0.45344217993554037	0.1060640832420843
H1	1887	562	35,82,112.1	-0.1802344482865615	0.07080427616070485	0.01102368349487189	-0.4585653701795351	0.0980964736064121
H1	1887	562	35,83,84	-0.09945522702883425	0.07706141559376892	0.1970686327217923	-0.40238290325998904	0.20347244920232055
H1	1887	562	35,83,85	-0.40200504588790764	0.0760497745178175	1.46001174483529e-07	-0.7009559708751789	-0.10305412090063637
H1	1887	562	35,83,87	-0.0011167223899612097	0.07449861487945253	0.9880425418750095	-0.29397005390463793	0.29173660912471555
H1	1887	562	35,83,112.1	-0.06826470761978803	0.07387123871377788	0.35560042479043774	-0.3586518295206616	0.22212241428108553
H1	1887	562	35,84,85	0.24230599834230185	0.07424928376182935	0.0011288683946038738	-0.04956721497065561	0.5341792116552593
H1	1887	562	35,84,87	0.05660783026313131	0.07390885271178381	0.4438638496852879	-0.23392715189857327	0.3471428124248359
H1	1887	562	35,84,112.1	0.04944778195951583	0.07337018813646905	0.5004611418267692	-0.2389697149884687	0.33786527890750034
H1	1887	562	35,85,87	-0.7908442695322766	0.07121880213899552	1.861284737915895e-27	-1.070804689019779	-0.5108838500447741
H1	1887	562	35,85,112.1	-0.2837600704799279	0.07087386415970437	6.580897183528468e-05	-0.562364542121087	-0.00515559883876876
H1	1887	562	35,87,112.1	-0.11530048449442087	0.07112119632672169	0.10521629207976423	-0.39487721648188273	0.16427624749304098
H1	1887	562	65,66,69	-0.060627936465006804	0.07077605031119849	0.3918117265733636	-0.3388479028177177	0.2175920298877041
H1	1887	562	65,66,82	0.041121408782893956	0.07063148736392635	0.5605333390389158	-0.2365302820281746	0.3187730995939625
H1	1887	562	65,66,83	0.10018802111440336	0.0742555976808346	0.17749299732677148	-0.1917100121528391	0.3920860543816458
H1	1887	562	65,66,84	0.002138018317984186	0.07355533834640939	0.9768156915380759	-0.2870073023069829	0.2912833389429512
H1	1887	562	65,66,85	0.06826905707551487	0.07067155376360951	0.33421807902520895	-0.2095401343635586	0.34607824851458835
H1	1887	562	65,66,87	0.06622731565995295	0.0709285598094012	0.35061918631272926	-0.2125921640489266	0.3450467953688325
H1	1887	562	65,66,112.1	-0.08122573077600145	0.07081394530739588	0.2515762354513651	-0.3595946619907048	0.19714320043870184
H1	1887	562	65,69,82	0.11369450675467475	0.0706716688561181	0.10790472072994306	-0.16411513711193215	0.39150415062128163
H1	1887	562	65,69,83	0.06388590243007214	0.07418025374017274	0.38926985405205294	-0.2277159545382153	0.3554877593983596
H1	1887	562	65,69,84	-0.04908170026038716	0.07330961345739295	0.5032852757886626	-0.33726107873326217	0.23909767821248784
H1	1887	562	65,69,85	0.12246151401406086	0.07072009291577419	0.0835710058474349	-0.1555384843607298	0.4004615123888515
H1	1887	562	65,69,87	-0.007974882154935081	0.07070584812438316	0.9102144732585484	-0.2859188843931218	0.26996912008325163
H1	1887	562	65,69,112.1	-0.029041849744312113	0.07074482435270778	0.6814941792964844	-0.3071390671574818	0.24905536766885755
H1	1887	562	65,82,83	-0.20935274480549615	0.07633655823325	0.0061795263620946705	-0.5094310137927125	0.09072552418172014
H1	1887	562	65,82,84	0.07046079537226047	0.0737366632256565	0.3394621010862784	-0.21939731159188802	0.36031890233640895
H1	1887	562	65,82,85	0.02913004535552101	0.07134773788221473	0.6831321250888773	-0.2513372192862728	0.3095973099973148
H1	1887	562	65,82,87	0.08854142964342256	0.07066126098391552	0.21041200691751713	-0.1892273009786437	0.3663101602654888
H1	1887	562	65,82,112.1	0.06292003682936073	0.07043131835690666	0.37183033419023603	-0.21394479155927817	0.33978486521799967
H1	1887	562	65,83,84	-0.0007242979603285515	0.07804297041479105	0.9925965294808032	-0.3075104566594562	0.30606186073879904
H1	1887	562	65,83,85	-0.22825101742287918	0.07635620499150399	0.00284778434603234	-0.5284065176259705	0.07190448278021211
H1	1887	562	65,83,87	-0.19164400060314524	0.07437728119967547	0.010083787570769208	-0.4840203706010858	0.10073236939479535
H1	1887	562	65,83,112.1	0.04964711796250716	0.07390249597476925	0.5018331267253875	-0.24086287592773375	0.34015711185274805
H1	1887	562	65,84,85	0.10212364532051565	0.0737956848646763	0.1666312823342227	-0.18796647513336517	0.3922137657743965
H1	1887	562	65,84,87	-0.027284817166406183	0.0734595856853476	0.7103794726071394	-0.31605373501074824	0.26148410067793587
H1	1887	562	65,84,112.1	-0.0887202901563679	0.07319709986736041	0.22570020383349484	-0.37645737879962626	0.19901679848689047
H1	1887	562	65,85,87	0.07979881024494116	0.07070055441754583	0.25923412767258985	-0.19812438248308378	0.35772200297296614
H1	1887	562	65,85,112.1	0.010810386852108639	0.0704919667106914	0.8781406599382273	-0.2662928496262038	0.28791362333042114
H1	1887	562	65,87,112.1	0.0045995963846239	0.07075517494505786	0.9481780672769871	-0.27353830910654264	0.2827375018757904
H1	1887	562	66,69,82	-0.08028128167735493	0.07054836371971435	0.25534251921612927	-0.35760621425037414	0.19704365089566428
H1	1887	562	66,69,83	0.1629225256252609	0.07415833709501889	0.028196311319876877	-0.12859317722379468	0.4544382284743165
H1	1887	562	66,69,84	-0.09578324961887003	0.07310800551234607	0.19036849279172294	-0.3831701092179063	0.19160360998016623
H1	1887	562	66,69,85	-0.006464853791030137	0.07058444936853348	0.9270373704675824	-0.2839316386990713	0.27100193111701104
H1	1887	562	66,69,87	-0.08049651963897628	0.07073454850894928	0.2553226500273978	-0.3585533428101366	0.19756030353218404
H1	1887	562	66,69,112.1	0.07551931711940213	0.0706463528476252	0.28527479583507925	-0.20219080976370385	0.3532294440025081
H1	1887	562	66,82,83	-0.06522756678757716	0.07646125468680633	0.39376912602983505	-0.3657960163225945	0.23534088274744022
H1	1887	562	66,82,84	-0.04616628880825971	0.07360554626275886	0.5306282779929888	-0.3355089762647463	0.2431763986482269
H1	1887	562	66,82,85	0.09474982937507265	0.07172631002978513	0.1867323610071945	-0.18720559870189446	0.37670525745203975
H1	1887	562	66,82,87	0.023549409008911948	0.07083108001685295	0.7395848494059252	-0.25488687858224424	0.30198569660006813
H1	1887	562	66,82,112.1	-0.1464303452252837	0.07056567994980016	0.03817051799290781	-0.42382334773058433	0.13096265728001694
H1	1887	562	66,83,84	-0.20122473105027103	0.0771005014357662	0.00915890202621416	-0.5043060533466914	0.10185659124614935
H1	1887	562	66,83,85	-0.14246992112748358	0.07654599171518804	0.06293261377623209	-0.44337147109805125	0.1584316288430841
H1	1887	562	66,83,87	0.030720400010029347	0.07450984162846168	0.6801863203087348	-0.2621770637459613	0.32361786376602
H1	1887	562	66,83,112.1	0.02358155811504037	0.07386124718388187	0.7495733613797106	-0.2667662871788559	0.31392940340893666
H1	1887	562	66,84,85	0.04604272173155537	0.07362672550229923	0.5318468384297808	-0.2433832211098586	0.33546866457296937
H1	1887	562	66,84,87	-0.005902994401152523	0.0735243750045623	0.9360217391769234	-0.29492659843005375	0.28312060962774865
H1	1887	562	66,84,112.1	-0.08206280230342936	0.07309067321301449	0.2617456386536993	-0.36938152880213515	0.2052559241952764
H1	1887	562	66,85,87	0.10708225493781601	0.07090231599972811	0.13121076151829245	-0.17163406061013467	0.3857985704857667
H1	1887	562	66,85,112.1	0.03528081998757207	0.07066836339617483	0.6176897475525724	-0.2425158301481025	0.3130774701232466
H1	1887	562	66,87,112.1	0.011950939415612358	0.07087892340221447	0.86612865851176	-0.26667342005871547	0.2905752988899402
H1	1887	562	69,82,83	0.011315617823189905	0.07615226785566707	0.8818981960050418	-0.28803820747968956	0.31066944312606937
H1	1887	562	69,82,84	0.006504742614968639	0.07364087764093645	0.9296272698354812	-0.28297683214597397	0.29598631737591125
H1	1887	562	69,82,85	-0.07508486068745221	0.07170265968403486	0.29521224612022895	-0.3569473194849817	0.20677759811007732
H1	1887	562	69,82,87	0.057056332948756616	0.07059638046929696	0.41911777765615543	-0.22045735300050362	0.33457001889801685
H1	1887	562	69,82,112.1	0.15271622191469458	0.07040910877911968	0.03026127886830488	-0.12406130083937678	0.42949374466876594
H1	1887	562	69,83,84	0.03837140681066392	0.07733787932456203	0.6198688869512418	-0.2656430456610525	0.34238585928238036
H1	1887	562	69,83,85	-0.07025461446158768	0.0761795731871212	0.35657974949626536	-0.3697157767572071	0.22920654783403174
H1	1887	562	69,83,87	0.07632636046373809	0.07442914518719825	0.30531911495603936	-0.21625388636541953	0.3689066072928957
H1	1887	562	69,83,112.1	-0.12546521666614818	0.07383762748121526	0.08951542419239895	-0.4157202131382711	0.16478977980597476
H1	1887	562	69,84,85	0.07710302906516087	0.07371425290192801	0.29576482996745374	-0.21266698313407384	0.36687304126439557
H1	1887	562	69,84,87	0.018008495918773	0.07316952195818112	0.8056273223394601	-0.2696201842313552	0.30563717606890123
H1	1887	562	69,84,112.1	0.07018148358024764	0.07308925659211811	0.33712163234167336	-0.21713167419547355	0.35749464135596887
H1	1887	562	69,85,87	0.12820402388651114	0.07066201903509464	0.06985343994515167	-0.14956768662737757	0.40597573440039986
H1	1887	562	69,85,112.1	0.19424339796771276	0.07048165489802566	0.005932547004165173	-0.0828193028751654	0.47130609881059093
H1	1887	562	69,87,112.1	-0.02954927321790605	0.07072681042234998	0.6761650577224745	-0.3075756780458016	0.2484771316099895
H1	1887	562	82,83,84	-0.14486471998961584	0.07867689972780276	0.0658067238023421	-0.45414284866108034	0.1644134086818487
H1	1887	562	82,83,85	0.03283287364483899	0.07686489897120888	0.6693391735995118	-0.26932229765172283	0.33498804494140083
H1	1887	562	82,83,87	0.48751545463757634	0.07777744118527743	4.934347590797496e-10	0.18177308876068327	0.7932578205144694
H1	1887	562	82,83,112.1	0.31589777034644306	0.07566851162435809	3.177699575750328e-05	0.018445586090300614	0.6133499546025856
H1	1887	562	82,84,85	0.307501024002395	0.07440221270826793	3.806008803151453e-05	0.01502664848632762	0.5999753995184623
H1	1887	562	82,84,87	0.04340382173221863	0.07367690648266864	0.5558877312765882	-0.24621938205563892	0.3330270255200762
H1	1887	562	82,84,112.1	-0.11616826263064521	0.0734431056822114	0.11394646014689491	-0.40487239774272277	0.17253587248143232
H1	1887	562	82,85,87	-0.2256167227691328	0.0717681168839705	0.0017053474970867627	-0.5077364931838486	0.05650304764558306
H1	1887	562	82,85,112.1	0.09365222030479359	0.07147962257264964	0.19035707229953702	-0.1873334817741545	0.37463792238374166
H1	1887	562	82,87,112.1	0.1906675378362338	0.07062566150267746	0.007028683637801103	-0.08696125157084972	0.4682963272433173
H1	1887	562	83,84,85	-0.025086589613298543	0.07872310262099783	0.7500279679236159	-0.33454634140916195	0.2843731621825648
H1	1887	562	83,84,87	0.30057753447686536	0.07809260866503016	0.00012425748049957306	-0.006403751701834937	0.6075588206555657
H1	1887	562	83,84,112.1	0.07544083237079421	0.07645694127595533	0.32396494454153124	-0.22511066118806242	0.3759923259296508
H1	1887	562	83,85,87	-0.5454510010273007	0.07779008976117051	3.737852128024989e-12	-0.8512430883331787	-0.23965891372142273
H1	1887	562	83,85,112.1	0.08812733823523708	0.07570544753388056	0.24460040126975327	-0.2094700407224939	0.3857247171929681
H1	1887	562	83,87,112.1	0.16036245099075883	0.07427769053856682	0.03103243356538621	-0.13162242908564956	0.4523473310671672
H1	1887	562	84,85,87	-0.5737326830692531	0.07371984999435896	1.422068497092983e-14	-0.8635246973844715	-0.28394066875403473
H1	1887	562	84,85,112.1	-0.04157652161293249	0.0734971247444548	0.5717009331468629	-0.33049300513402247	0.24733996190815746
H1	1887	562	84,87,112.1	0.05854944360047114	0.07331072368315159	0.4246378243580966	-0.2296342991590778	0.3467331863600201
H1	1887	562	85,87,112.1	0.14028666347782298	0.07069792744598073	0.04742721847925319	-0.13762620265049436	0.4181995296061403
H1	1887	562	29,35,65,66	0.0349315637776359	0.046598293014725144	0.45360954582693136	-0.14824587347191465	0.21810900102718644
H1	1887	562	29,35,65,69	0.05653482790138453	0.04655492899714789	0.22482351455884128	-0.12647214581624788	0.23954180161901695
H1	1887	562	29,35,65,82	0.004649084904837467	0.046884171713119996	0.9210253790645921	-0.17965213873147318	0.18895030854114808
H1	1887	562	29,35,65,83	0.17110727947385668	0.04709601613670724	0.00029067123608014995	-0.014026702534011837	0.3562412614817252
H1	1887	562	29,35,65,84	0.013658417627543676	0.04710601120122514	0.771899374988798	-0.17151485488186646	0.19883169013695384
H1	1887	562	29,35,65,85	-0.07965661615512423	0.046884305857661665	0.08955320351069038	-0.2639583671123253	0.10464513480207682
H1	1887	562	29,35,65,87	0.021442202662674867	0.04662103864270921	0.6456451822405008	-0.16182464742956149	0.2047090527549112
H1	1887	562	29,35,65,112.1	0.011041929050733618	0.04659096292084031	0.8126955763317327	-0.17210669367095005	0.19419055177241729
H1	1887	562	29,35,66,69	0.036880624238671306	0.04659757808754734	0.4288109433246434	-0.1462940026390871	0.2200552511164297
H1	1887	562	29,35,66,82	0.16142479130976636	0.046923883644857445	0.0005994800353093381	-0.023032539544497438	0.34588212216403014
H1	1887	562	29,35,66,83	0.42839563605537	0.0471295763910846	3.5243026931653858e-19	0.24312972901350194	0.6136615430972381
H1	1887	562	29,35,66,84	-0.08299423121757565	0.04717279659935323	0.07874606976048551	-0.2684300364783664	0.10244157404321508
H1	1887	562	29,35,66,85	0.2548910652329409	0.04692143141433771	6.612615741475231e-08	0.07044337407303261	0.43933875639284925
H1	1887	562	29,35,66,87	0.13553023135718162	0.04666860157892831	0.00374418505732705	-0.047923588175371484	0.3189840508897347
H1	1887	562	29,35,66,112.1	0.0008260110699649381	0.04663065816632217	0.9858697543345611	-0.18247865327616322	0.1841306754160931
H1	1887	562	29,35,69,82	0.003909353422163642	0.04688742927904639	0.933564027285797	-0.18040467567416416	0.18822338251849144
H1	1887	562	29,35,69,83	0.02775336335354983	0.04718000021300925	0.55646861631674	-0.1577107592425568	0.21321748594965645
H1	1887	562	29,35,69,84	-0.0312582763227445	0.04718057040894999	0.5077504620951407	-0.21672464035355607	0.15420808770806707
H1	1887	562	29,35,69,85	0.06471194871369287	0.046887267471383325	0.16777008237662316	-0.11960144431828298	0.24902534174566873
H1	1887	562	29,35,69,87	0.09967258977567195	0.046676636208137376	0.032912517577069096	-0.08381281380626471	0.2831579933576086
H1	1887	562	29,35,69,112.1	0.0326987715998604	0.046597355451038214	0.48297067052953213	-0.150474980095943	0.2158725232956638
H1	1887	562	29,35,82,83	0.7223404623195683	0.04873527918512245	4.209294441941359e-46	0.5307625531899123	0.9139183714492243
H1	1887	562	29,35,82,84	-0.3348087618588062	0.04885337611477605	1.1023243766054813e-11	-0.5268509088719002	-0.14276661484571213
H1	1887	562	29,35,82,85	-0.02560083495893957	0.0481266769709025	0.5948519734481776	-0.2147863346956166	0.16358466477773742
H1	1887	562	29,35,82,87	0.2933504381230727	0.04699614555191359	5.803642619359821e-10	0.10860904641402339	0.47809182983212206
H1	1887	562	29,35,82,112.1	0.2255653252263148	0.046886098852655066	1.6744246524044966e-06	0.041256526023209394	0.40987412442942023
H1	1887	562	29,35,83,84	0.22425525789644293	0.04806952611715894	3.3947950081232825e-06	0.03529441761074756	0.41321609818213834
H1	1887	562	29,35,83,85	0.9986725867859204	0.048743939292104944	2.928052218867926e-81	0.8070606348598286	1.1902845387120122
H1	1887	562	29,35,83,87	0.2748248435680384	0.047215687835832916	7.345181882883657e-09	0.08922043327323212	0.4604292538628446
H1	1887	562	29,35,83,112.1	0.3935296547574691	0.04709004585683257	1.6062776991387415e-16	0.20841914186180088	0.5786401676531373
H1	1887	562	29,35,84,85	-0.42825406234166313	0.04884518226349456	5.4928787955401545e-18	-0.6202639994049535	-0.23624412527837285
H1	1887	562	29,35,84,87	-0.3057301205087381	0.047245657461351696	1.3663740062361276e-10	-0.4914523411103752	-0.12000789990710098
H1	1887	562	29,35,84,112.1	-0.11612314699678876	0.04710508835152463	0.013819964328046655	-0.3012927917929895	0.06904649779941198
H1	1887	562	29,35,85,87	0.4676136394677221	0.04700044439815039	1.5348893283032866e-22	0.28285534903586895	0.6523719298995753
H1	1887	562	29,35,85,112.1	0.23747729777676513	0.04688781312441467	4.6653398571834766e-07	0.05316175978802273	0.4217928357655075
H1	1887	562	29,35,87,112.1	0.14388340239413594	0.04664778727981745	0.0020813795578927706	-0.039488596330773645	0.3272554011190455
H1	1887	562	29,65,66,69	0.06876308238219861	0.04661797550048455	0.1404410653811046	-0.11449172652770373	0.25201789129210095
H1	1887	562	29,65,66,82	0.013599216553895732	0.04691664520978005	0.7719693847742886	-0.17082966008238296	0.19802809319017442
H1	1887	562	29,65,66,83	0.020745399352626787	0.04712115041620024	0.6598230494815425	-0.16448738526380913	0.2059781839690627
H1	1887	562	29,65,66,84	0.028097750674889233	0.04716568695977976	0.5514610941500953	-0.1573101066617914	0.21350560801156987
H1	1887	562	29,65,66,85	0.014457294890864447	0.04691451046271736	0.758007089212331	-0.16996319007544478	0.19887777985717367
H1	1887	562	29,65,66,87	0.011884993630100954	0.04667398654888735	0.7990418391798002	-0.171589994167059	0.1953599814272609
H1	1887	562	29,65,66,112.1	0.0821134333931278	0.046656469458777335	0.07864562546893096	-0.10129269489294643	0.265519561679202
H1	1887	562	29,65,69,82	-0.0547245645722072	0.046887186226906546	0.2433582052665898	-0.23903763823293395	0.12958850908851954
H1	1887	562	29,65,69,83	-0.06612300900278403	0.047158264307279936	0.1611043780684775	-0.2515016879645812	0.11925566995901316
H1	1887	562	29,65,69,84	0.05355813029542163	0.04718053660213476	0.25650761765534247	-0.13190810084112764	0.23902436143197087
H1	1887	562	29,65,69,85	-0.07983504853491104	0.046886975956235304	0.08885638852182223	-0.2641472956236714	0.10447719855384933
H1	1887	562	29,65,69,87	-0.007366747697265558	0.04661042197128386	0.8744419809023694	-0.19059186375724452	0.1758583683627134
H1	1887	562	29,65,69,112.1	0.07969695240361292	0.04658312980870484	0.08734206049983016	-0.10342087843034621	0.26281478323757207
H1	1887	562	29,65,82,83	0.22950447409708036	0.04869340574219831	2.694996190733224e-06	0.03809116906485854	0.42091777912930217
H1	1887	562	29,65,82,84	-0.0865790173744323	0.048774135029502966	0.07611073134102925	-0.27830966845095617	0.10515163370209155
H1	1887	562	29,65,82,85	0.02534338186149987	0.048058468938159	0.5980424792736038	-0.1635739927609409	0.21426075648394063
H1	1887	562	29,65,82,87	0.02468322759458022	0.04690634063843691	0.5988208638304174	-0.15970514187183296	0.2090715970609934
H1	1887	562	29,65,82,112.1	-0.02015554245043988	0.04683473030384076	0.6670076897261468	-0.2042624123870793	0.16395132748619953
H1	1887	562	29,65,83,84	-0.0572145539567151	0.048029825425466986	0.23377676884735307	-0.246019331208967	0.1315902232955368
H1	1887	562	29,65,83,85	0.11138745645263906	0.048701734359293314	0.022344989566782873	-0.08005858829249055	0.30283350119776864
H1	1887	562	29,65,83,87	0.0681353279254093	0.047112038282146745	0.14834631516615254	-0.11706163698056496	0.2533322928313836
H1	1887	562	29,65,83,112.1	0.0038926956144586244	0.047067218554048815	0.934098578988219	-0.18112808337567948	0.18891347460459673
H1	1887	562	29,65,84,85	-0.06634237822691887	0.048767412048164566	0.17394000500461418	-0.2580466013290992	0.12536184487526147
H1	1887	562	29,65,84,87	0.027378271826578593	0.04717142102731636	0.5617438947067668	-0.15805212607389563	0.2128086697270528
H1	1887	562	29,65,84,112.1	0.04599218800492852	0.047098967537589326	0.3289945080891624	-0.13915339593114165	0.2311377719409987
H1	1887	562	29,65,85,87	-0.03388900453560391	0.04690961187235572	0.4701564050104582	-0.21829023319077967	0.15051222411957188
H1	1887	562	29,65,85,112.1	0.010905393150584697	0.046830550217790444	0.8158989354772533	-0.17318504490839048	0.19499583120955988
H1	1887	562	29,65,87,112.1	-0.00986575559340866	0.04658452181486521	0.8323098098993318	-0.19298905839006417	0.17325754720324685
H1	1887	562	29,66,69,82	0.013055876255211832	0.046909847646926885	0.7808113370093663	-0.17134627922751322	0.19745803173793686
H1	1887	562	29,66,69,83	-0.014878394710724607	0.047159319372690287	0.752437698547662	-0.20026122112440245	0.17050443170295324
H1	1887	562	29,66,69,84	0.025340768697491745	0.047199977052527105	0.5914399835318834	-0.16020188266073218	0.21088342005571567
H1	1887	562	29,66,69,85	0.008858157491399773	0.04690689929692848	0.8502428191672449	-0.1755324080561177	0.19324872303891727
H1	1887	562	29,66,69,87	0.05446102530704475	0.04667907069251584	0.24353669044436418	-0.12903394820933844	0.23795599882342794
H1	1887	562	29,66,69,112.1	-0.007740098689662245	0.046590026122819456	0.8680783420497773	-0.19088503886742467	0.17540484148810018
H1	1887	562	29,66,82,83	0.02662597954389609	0.04887884828185094	0.5860280172030721	-0.165516298310568	0.21876825739836017
H1	1887	562	29,66,82,84	0.0077940865378981206	0.04902439897944027	0.8737058449561264	-0.18492034969511156	0.2005085227709078
H1	1887	562	29,66,82,85	-0.09606442642679842	0.048219325422212175	0.04654973847037831	-0.2856141263257149	0.09348527347211806
H1	1887	562	29,66,82,87	0.04832283869329909	0.04699321970114403	0.30399929880223325	-0.13640705152479277	0.23305272891139095
H1	1887	562	29,66,82,112.1	0.12274276011092787	0.046940919839309835	0.009028354115913849	-0.06178153985826225	0.307267060080118
H1	1887	562	29,66,83,84	0.12493439677819895	0.048147101508603796	0.009567761182278948	-0.06433139161780616	0.31420018517420406
H1	1887	562	29,66,83,85	0.08453568463915234	0.04888098557030331	0.08396710709142245	-0.10761499487545936	0.276686364153764
H1	1887	562	29,66,83,87	0.06741819765374168	0.047228512455309346	0.15367452423217484	-0.11823662609566582	0.2530730214031492
H1	1887	562	29,66,83,112.1	0.06801940047775604	0.04711404788061611	0.1490546963241776	-0.11718546414028283	0.2532242650957949
H1	1887	562	29,66,84,85	-0.029303024556963625	0.04902271317801743	0.5501130159431991	-0.22201083392095367	0.16340478480702642
H1	1887	562	29,66,84,87	-0.006561256340885377	0.0473356816007776	0.8897784432501147	-0.19263736096023582	0.1795148482784651
H1	1887	562	29,66,84,112.1	-0.04130248730651541	0.04716575662634143	0.3813583836176546	-0.22671061850177332	0.14410564388874253
H1	1887	562	29,66,85,87	0.003898360619407487	0.046998701865034846	0.933906899440812	-0.18085307993169303	0.188649801170508
H1	1887	562	29,66,85,112.1	0.020991888848086587	0.046944665316133984	0.654830897543561	-0.1635471345541209	0.20553091225029407
H1	1887	562	29,66,87,112.1	0.05117823896620402	0.04669735597249331	0.27329726657517106	-0.1323886138081727	0.23474509174058075
H1	1887	562	29,69,82,83	-0.07609440283097524	0.04888843823528202	0.1198302424978841	-0.2682743786992334	0.1160855730372829
H1	1887	562	29,69,82,84	0.080272228525465	0.048958812125619644	0.10132846046143228	-0.11218438642219575	0.27272884347312576
H1	1887	562	29,69,82,85	0.048815315392487374	0.04819825946266568	0.31133943599989883	-0.14065157442405743	0.23828220520903218
H1	1887	562	29,69,82,87	5.398426144753721e-05	0.047054237591619814	0.9990847780086991	-0.1849157666914613	0.18502373521435636
H1	1887	562	29,69,82,112.1	-0.04656198507776291	0.04683307031427479	0.32030135268218385	-0.23066232961154132	0.1375383594560155
H1	1887	562	29,69,83,84	0.01683148684030411	0.04817646231396589	0.7268658812212214	-0.17254971859640916	0.20621269227701738
H1	1887	562	29,69,83,85	0.014104171029509227	0.04888695873975814	0.7730047188233888	-0.1780699889562143	0.20627833101523274
H1	1887	562	29,69,83,87	-0.006940749297084381	0.04726722251912468	0.8832801431141564	-0.19274774193137398	0.17886624333720522
H1	1887	562	29,69,83,112.1	0.05158873624200863	0.04713085391328823	0.273897327004988	-0.1336821927272338	0.23685966521125107
H1	1887	562	29,69,84,85	0.0009121245414733664	0.04896267767995914	0.9851398921421638	-0.1915596858627513	0.19338393494569805
H1	1887	562	29,69,84,87	-0.028837060420045427	0.04730038987771466	0.542192920682709	-0.21477443361881043	0.15710031277871955
H1	1887	562	29,69,84,112.1	-0.024282944780846208	0.04714549054784372	0.6065942131958204	-0.20961141021836627	0.16104552065667382
H1	1887	562	29,69,85,87	-0.040128082788012526	0.047059849252865785	0.3939780366442315	-0.22511989312677536	0.1448637275507503
H1	1887	562	29,69,85,112.1	-0.043723119874984326	0.0468317465818198	0.35066933307936643	-0.2278182608293391	0.1403720210793704
H1	1887	562	29,69,87,112.1	0.053655047171289785	0.04662533441211346	0.25003440190071485	-0.1296286895487515	0.2369387838913311
H1	1887	562	29,82,83,84	-0.0011607334467605701	0.05175920109914903	0.982111800671284	-0.2046256502502621	0.20230418335674097
H1	1887	562	29,82,83,85	-0.2688692782892988	0.05023364872804146	1.021964439362021e-07	-0.4663372635390811	-0.07140129303951648
H1	1887	562	29,82,83,87	-0.1907785720629659	0.04912608780480981	0.00010806356360029574	-0.3838927460808387	0.002335601954906924
H1	1887	562	29,82,83,112.1	-0.06774493147917385	0.04861895421798725	0.16373702278701296	-0.2588655682928411	0.12337570533449338
H1	1887	562	29,82,84,85	-0.13016286879843209	0.050331948907121365	0.009813088345128954	-0.3280172710974256	0.06769153350056142
H1	1887	562	29,82,84,87	0.05219571623100186	0.0492706370709003	0.2896254785279788	-0.14148667954792113	0.24587811200992485
H1	1887	562	29,82,84,112.1	0.12365674247987306	0.0487105879202898	0.011243318537933356	-0.06782410552754252	0.3151375904872886
H1	1887	562	29,82,85,87	0.16764902888075006	0.04836370588501071	0.0005443031169296426	-0.02246822921511546	0.3577662869766156
H1	1887	562	29,82,85,112.1	-0.02369863836601449	0.04804697667203541	0.6219255242283194	-0.21257083700194337	0.1651735602699144
H1	1887	562	29,82,87,112.1	0.0026674995068455	0.046906833325849225	0.9546588904722109	-0.18172280670900018	0.18705780572269118
H1	1887	562	29,83,84,85	-0.26788114372570543	0.051762113288944485	2.627235277094669e-07	-0.4713575083190079	-0.06440477913240292
H1	1887	562	29,83,84,87	-0.374095506908535	0.048273761371082115	1.8263067895236788e-14	-0.5638591939937437	-0.18433181982332625
H1	1887	562	29,83,84,112.1	-0.01760872366314277	0.04799269104591845	0.7137490055668	-0.20626752603006132	0.1710500787037758
H1	1887	562	29,83,85,87	0.27459875491662955	0.04913111201889122	2.7677543835957943e-08	0.08146483076200098	0.46773267907125815
H1	1887	562	29,83,85,112.1	0.016294943598990558	0.048619238159329094	0.7375617946457111	-0.17482680938533363	0.20741669658331474
H1	1887	562	29,83,87,112.1	0.020349030658001588	0.0471119022783714	0.6658627712994449	-0.16484739961845274	0.20554546093445591
H1	1887	562	29,84,85,87	0.24410253320520525	0.049265184046774886	8.171954744681093e-07	0.05044157321115611	0.4377634931992544
H1	1887	562	29,84,85,112.1	0.05844544396424727	0.04871075259735043	0.23041331135394535	-0.13303605138709418	0.24992693931558874
H1	1887	562	29,84,87,112.1	-0.043471002904308595	0.04716651632521429	0.35687913524298787	-0.22888212046845707	0.14194011465983986
H1	1887	562	29,85,87,112.1	-0.04672215848852204	0.046916895266825645	0.3195051857942642	-0.23115201809661826	0.13770770111957417
H1	1887	562	35,65,66,69	0.04017111107599311	0.046613946099425055	0.3889628172827684	-0.14306785829748037	0.22341008044946659
H1	1887	562	35,65,66,82	-0.057740296579648256	0.04693137342954467	0.21879815552084964	-0.24222706970477215	0.1267464765454756
H1	1887	562	35,65,66,83	-0.05702480306921291	0.047156688635300134	0.22677783758516462	-0.2423972880797614	0.1283476819413356
H1	1887	562	35,65,66,84	0.007301722346072209	0.04720656248973915	0.8771003069467387	-0.17826681630187047	0.19287026099401489
H1	1887	562	35,65,66,85	-0.062366622027982	0.04693307870503595	0.18412906036756121	-0.24686009857449942	0.1221268545185354
H1	1887	562	35,65,66,87	-0.05059569522677008	0.04671488799202925	0.27897249180216804	-0.2342314661996608	0.13304007574612065
H1	1887	562	35,65,66,112.1	0.03256770543956957	0.0465783470319688	0.484548088524149	-0.15053132434549346	0.21566673522463262
H1	1887	562	35,65,69,82	0.0036144660814446464	0.04686806967902114	0.9385397166264151	-0.18062346061521628	0.18785239277810556
H1	1887	562	35,65,69,83	0.0040836934116840334	0.047161214172659414	0.9310104325433577	-0.18130658144226897	0.18947396826563706
H1	1887	562	35,65,69,84	0.03260944856400412	0.04718424599126784	0.4896182175113414	-0.15287136414519942	0.21809026127320763
H1	1887	562	35,65,69,85	-0.01223402742111613	0.046869483417236076	0.7941150990837464	-0.19647751150896886	0.17200945666673662
H1	1887	562	35,65,69,87	0.015971579555862765	0.0466642893266489	0.732205326024881	-0.16746528855486323	0.19940844766658875
H1	1887	562	35,65,69,112.1	-0.00019202651468046283	0.046554747967984124	0.9967095590126462	-0.1831982886084284	0.18281423557906745
H1	1887	562	35,65,82,83	0.008552290429854115	0.04870027586657694	0.86062661407425	-0.1828880209945732	0.19999260185428144
H1	1887	562	35,65,82,84	-0.046166955897923495	0.04879086689136745	0.3442082630427721	-0.23796337976092646	0.14562946796507947
H1	1887	562	35,65,82,85	-0.01901209270842942	0.04810290512448758	0.6927309215113231	-0.2081041455477362	0.17007996013087734
H1	1887	562	35,65,82,87	-0.006452522314118428	0.04700986658198523	0.8908470138041324	-0.19124785125911226	0.17834280663087543
H1	1887	562	35,65,82,112.1	-0.022955027765198463	0.046828502368722866	0.6240781326350624	-0.20703741574937895	0.16112736021898205
H1	1887	562	35,65,83,84	-0.03221705292292287	0.048088193248547025	0.5030015246260149	-0.22125127352079813	0.15681716767495238
H1	1887	562	35,65,83,85	0.026047154831343372	0.048696173523931054	0.5928148403033768	-0.16537703032398746	0.2174713399866742
H1	1887	562	35,65,83,87	0.02664418739771815	0.04720665194677927	0.5725666141784087	-0.15892470290498037	0.21221307770041667
H1	1887	562	35,65,83,112.1	-0.047219801269332284	0.0470486571597158	0.3157365729352126	-0.232167615598627	0.13772801305996243
H1	1887	562	35,65,84,85	-0.052017775076461714	0.048793368901838725	0.28658039528399293	-0.2438240343183262	0.13978848416540277
H1	1887	562	35,65,84,87	-0.015378904345616923	0.04726107804225478	0.7449273367825489	-0.2011617431010099	0.17040393440977605
H1	1887	562	35,65,84,112.1	0.01601559048017119	0.04706559450655197	0.7336978559565699	-0.16899880439503057	0.20102998535537298
H1	1887	562	35,65,85,87	-0.011269440679393727	0.0470094758438572	0.810578980049697	-0.1960632336366014	0.17352435227781393
H1	1887	562	35,65,85,112.1	0.015176717800946177	0.046833447246479074	0.7459458419774454	-0.16892510844966627	0.19927854405155862
H1	1887	562	35,65,87,112.1	-0.0044103698891135995	0.04662300290982337	0.9246496840553834	-0.18768494149629755	0.17886420171807038
H1	1887	562	35,66,69,82	0.03627524444423259	0.04689175763835176	0.4393081314959063	-0.1480557993904849	0.22060628827895012
H1	1887	562	35,66,69,83	0.002212489935949552	0.04714311749491039	0.9625750178439062	-0.18310664705353813	0.18753162692543723
H1	1887	562	35,66,69,84	0.026702678932680204	0.04717656170211304	0.5714788898694669	-0.15874792691049033	0.21215328477585077
H1	1887	562	35,66,69,85	-0.03901383685355553	0.046892335172160675	0.40556591591453106	-0.22334715096806654	0.14531947726095548
H1	1887	562	35,66,69,87	-0.011714069582468137	0.04673658291390326	0.8021311061652688	-0.19543512308253114	0.17200698391759484
H1	1887	562	35,66,69,112.1	-0.03563511182537148	0.04657394206179709	0.4443305013390215	-0.2187168257154733	0.14744660206473031
H1	1887	562	35,66,82,83	-0.1351507695058804	0.0486638652060873	0.005559700731060642	-0.32644795097756574	0.056146411965804915
H1	1887	562	35,66,82,84	0.06991034557566075	0.048832600067084245	0.15248480569261966	-0.12205013099574663	0.26187082214706814
H1	1887	562	35,66,82,85	0.09700533904465514	0.048107779833491106	0.043957851670487096	-0.09210587622839833	0.2861165543177086
H1	1887	562	35,66,82,87	0.0413642119074641	0.04702971930105146	0.3792715794056233	-0.14350915788335727	0.22623758169828545
H1	1887	562	35,66,82,112.1	0.051801085110308065	0.04683599063189597	0.2689228587070467	-0.13231073916367525	0.23591290938429138
H1	1887	562	35,66,83,84	-0.010057832052351418	0.04803139572496069	0.8341672433347938	-0.19886878213666134	0.1787531180319585
H1	1887	562	35,66,83,85	0.0033511593296271375	0.048674690598108916	0.9451209292089204	-0.18798857665295227	0.19469089531220657
H1	1887	562	35,66,83,87	0.1066626458220813	0.0472458079934114	0.024132144784853097	-0.07906016651962046	0.2923854581637831
H1	1887	562	35,66,83,112.1	-0.050017272714780917	0.047046819932981	0.28791298852862707	-0.23495786492362541	0.1349233194940636
H1	1887	562	35,66,84,85	0.0689030329346931	0.04882136262215114	0.1583822211483004	-0.12301326934982723	0.2608193352192134
H1	1887	562	35,66,84,87	-0.013286424789119865	0.04733179640650441	0.7789780191760307	-0.1993472567475178	0.17277440716927805
H1	1887	562	35,66,84,112.1	0.017572932266725308	0.047094833042676955	0.7091044678007499	-0.16755639901000108	0.20270226354345172
H1	1887	562	35,66,85,87	-0.04575843972016552	0.047029612141522716	0.33074539709061035	-0.2306313882679202	0.13911450882758916
H1	1887	562	35,66,85,112.1	0.0007269046010823094	0.04684043395685313	0.987620668804994	-0.18340238634015132	0.18485619554231597
H1	1887	562	35,66,87,112.1	-0.021481067318660382	0.04663039838010129	0.645113413768994	-0.20478471044767743	0.1618225758103567
H1	1887	562	35,69,82,83	0.018606157224253322	0.048864148635965485	0.7034326007979359	-0.17347833646500707	0.21069065091351372
H1	1887	562	35,69,82,84	0.024470233574969184	0.04896034383320096	0.6173010002981589	-0.16799240250031683	0.2169328696502552
H1	1887	562	35,69,82,85	0.005945546346543484	0.048286256227908116	0.9020218516342602	-0.18386725789949052	0.19575835059257748
H1	1887	562	35,69,82,87	0.003997089853782783	0.04710291707125242	0.9323865868826152	-0.18116401966075674	0.1891581993683223
H1	1887	562	35,69,82,112.1	0.028623338178377575	0.04679534376775055	0.5408606196434653	-0.1553287036674375	0.21257538002419263
H1	1887	562	35,69,83,84	0.0016145721236406063	0.04824996544063039	0.9733106831739898	-0.18805557339008316	0.19128471763736438
H1	1887	562	35,69,83,85	0.03691952248260637	0.048869106236863344	0.4500966503877265	-0.1551844594876322	0.22902350445284497
H1	1887	562	35,69,83,87	0.04555014455862498	0.0473241748314452	0.3359674782068417	-0.14048072706224063	0.23158101617949062
H1	1887	562	35,69,83,112.1	0.022719490543219353	0.04712459992930541	0.6298036692318201	-0.16252685407572914	0.20796583516216788
H1	1887	562	35,69,84,85	0.030654293049169105	0.0489530068863545	0.5312926940744092	-0.1617795015593244	0.22308808765766264
H1	1887	562	35,69,84,87	0.02830937942232887	0.047370309268091895	0.5501965480394059	-0.15790284622090883	0.21452160506556656
H1	1887	562	35,69,84,112.1	-0.050256681902168296	0.04713218329489021	0.28648580172401117	-0.23553283665757635	0.13501947285323973
H1	1887	562	35,69,85,87	-0.08696484835138657	0.047109397855223195	0.06511236930881147	-0.2721514337647698	0.09822173706199666
H1	1887	562	35,69,85,112.1	-0.005799395207784511	0.046793284777682034	0.901384363060358	-0.18974334318363845	0.1781445527680694
H1	1887	562	35,69,87,112.1	0.03282694239309859	0.046629944231733084	0.4815636619500133	-0.15047491548309405	0.2161288002692912
H1	1887	562	35,82,83,84	-0.19805241747342206	0.051747831899962266	0.0001356182001546499	-0.4014726420653451	0.005367807118500989
H1	1887	562	35,82,83,85	-0.2362397764500125	0.050112893799375495	2.683363507830622e-06	-0.4332330752480552	-0.03924647765196984
H1	1887	562	35,82,83,87	-0.3125603930897824	0.04916832515186642	2.825295126263238e-10	-0.5058406017086996	-0.11928018447086516
H1	1887	562	35,82,83,112.1	-0.19185622541473918	0.048458378380641515	7.919707762172149e-05	-0.3823456401714118	-0.0013668106580665695
H1	1887	562	35,82,84,85	-0.1761256807677232	0.05025301745223317	0.0004722236290432241	-0.37366980428418217	0.02141844274873575
H1	1887	562	35,82,84,87	0.10859337360314017	0.04933939019361427	0.027911757259566926	-0.08535929003339873	0.3025460372396791
H1	1887	562	35,82,84,112.1	0.058027177559351856	0.048540547554278904	0.23213015484614904	-0.1327852434208117	0.2488395985395154
H1	1887	562	35,82,85,87	0.11138046368100174	0.048371742942828734	0.02145608095165113	-0.07876838801108557	0.301529315373089
H1	1887	562	35,82,85,112.1	0.06261688946933566	0.047946774824989755	0.1917905736509716	-0.12586141667907882	0.2510951956177502
H1	1887	562	35,82,87,112.1	0.0029909732764310665	0.046897154387966225	0.9491571836146858	-0.18136128512860433	0.1873432316814665
H1	1887	562	35,83,84,85	0.001471581703668734	0.05175865534181771	0.9773221978597942	-0.20199118973306412	0.2049343531404016
H1	1887	562	35,83,84,87	-0.03656269161648534	0.04830192642205762	0.44920759416798617	-0.22643709524352248	0.1533117120105518
H1	1887	562	35,83,84,112.1	-0.07308692901337277	0.04789257385821088	0.12723363848221114	-0.26135217168781266	0.11517831366106715
H1	1887	562	35,83,85,87	0.2768492745375646	0.049165880710673494	2.1858183987243587e-08	0.08357867499323485	0.4701198740818943
H1	1887	562	35,83,85,112.1	0.027560236814904215	0.04846341692234566	0.5696688408336865	-0.16294898440026997	0.2180694580300784
H1	1887	562	35,83,87,112.1	-0.003060839222336964	0.047088863869591505	0.9481827390822839	-0.18816670573764074	0.18204502729296682
H1	1887	562	35,84,85,87	0.370043744091389	0.04934226838993142	1.1683047427262475e-13	0.17607976629308217	0.5640077218896958
H1	1887	562	35,84,85,112.1	0.0869378948485503	0.048535067315897754	0.073483150597806	-0.10385298336776438	0.277728773064865
H1	1887	562	35,84,87,112.1	0.014266225611883981	0.047127060858614574	0.7621520361001496	-0.1709897928962768	0.19952224412004477
H1	1887	562	35,85,87,112.1	0.03063298077379431	0.04690108723273917	0.5137792754537548	-0.15373473760584536	0.21500069915343398
H1	1887	562	65,66,69,82	-0.03632635747852547	0.04693288002710364	0.43906498389624504	-0.22081905302402066	0.14816633806696972
H1	1887	562	65,66,69,83	-0.06891907926984386	0.047198260335051985	0.14447112826505745	-0.25445498222834695	0.1166168236886592
H1	1887	562	65,66,69,84	0.05341302496000505	0.04723376453809013	0.2583342584602575	-0.13226244467580228	0.23908849459581238
H1	1887	562	65,66,69,85	-0.037540762982017695	0.04693078698031465	0.42390191882838646	-0.22202523078091432	0.14694370481687893
H1	1887	562	65,66,69,87	0.005711299098288464	0.04663747484464502	0.9025520383491833	-0.17762016154411903	0.18904275974069595
H1	1887	562	65,66,69,112.1	0.02583694452410032	0.04656800064293812	0.5791101585459153	-0.1572214137061736	0.20889530275437423
H1	1887	562	65,66,82,83	0.020477128759297566	0.04878517693704938	0.6747428706621019	-0.1712969279485454	0.21225118546714056
H1	1887	562	65,66,82,84	-0.016384308537224182	0.04891882385604567	0.7377320323996199	-0.20868372998558038	0.175915112911132
H1	1887	562	65,66,82,85	0.03506064264522993	0.048113443954462605	0.46630918389564	-0.15407283823234907	0.22419412352280893
H1	1887	562	65,66,82,87	-0.02379059321925177	0.047006493802697245	0.6128615840803342	-0.2085726638016231	0.16099147736311953
H1	1887	562	65,66,82,112.1	0.002579199033348953	0.0468337945766902	0.9560899447388869	-0.18152399256894997	0.18668239063564784
H1	1887	562	65,66,83,84	-0.06213078248926035	0.04807627694726217	0.19646557219894004	-0.2511181602225233	0.1268565952440026
H1	1887	562	65,66,83,85	0.044922889107568406	0.048799591885113194	0.3574484377082051	-0.14690783262110657	0.23675361083624336
H1	1887	562	65,66,83,87	0.0001662098395322914	0.047202413361832375	0.9971910128827332	-0.18538601862690773	0.1857184383059723
H1	1887	562	65,66,83,112.1	-0.04131359699050936	0.04704682181646189	0.3800280952738486	-0.22625419660329893	0.14362700262228023
H1	1887	562	65,66,84,85	-0.06994317385912407	0.04890285524646104	0.15288183383869638	-0.26217982285830005	0.1222934751400519
H1	1887	562	65,66,84,87	-0.01773057586315717	0.0472767967247139	0.7076925326060877	-0.20357520460662742	0.16811405288031306
H1	1887	562	65,66,84,112.1	0.04572770254790559	0.047104749964086326	0.3318418544240096	-0.1394406120505618	0.23089601714637298
H1	1887	562	65,66,85,87	0.002448036647955648	0.04700781159395834	0.9584750054253424	-0.18233921415906382	0.1872352874549751
H1	1887	562	65,66,85,112.1	-0.03321828635573344	0.04683535210782254	0.47828998478849494	-0.21732760059778589	0.15089102788631897
H1	1887	562	65,66,87,112.1	-0.00929209327091536	0.046615392859672845	0.8420310530588592	-0.19253674984487107	0.17395256330304038
H1	1887	562	65,69,82,83	0.03179954785807371	0.0490039934375226	0.5165041714361456	-0.16083467438784882	0.22443377010399623
H1	1887	562	65,69,82,84	-0.06676059372929644	0.049075901987258586	0.17394934205965173	-0.259677487785811	0.1261563003272181
H1	1887	562	65,69,82,85	0.04293308128123953	0.04836020191919511	0.37482176818911317	-0.14717040275903753	0.23303656532151656
H1	1887	562	65,69,82,87	-0.026465556136529345	0.047013722947326045	0.5735760339697701	-0.21127604441622255	0.15834493214316386
H1	1887	562	65,69,82,112.1	-0.06996012410283438	0.0468681054630342	0.13575321780956717	-0.25419819146610306	0.11427794326043432
H1	1887	562	65,69,83,84	-0.020228566635096423	0.04833911710581058	0.6756698769434633	-0.2102491664787476	0.16979203320855477
H1	1887	562	65,69,83,85	0.07592438399746199	0.048999931262172454	0.12150532373526417	-0.11669386987661345	0.2685426378715374
H1	1887	562	65,69,83,87	-0.029955578663878366	0.047217091541597575	0.5259147386134541	-0.21556550691241189	0.15565434958465513
H1	1887	562	65,69,83,112.1	-0.00622976653343027	0.04712416165483886	0.8948469721968468	-0.1914743882997076	0.17901485523284705
H1	1887	562	65,69,84,85	-0.08247657662267369	0.049080312526887125	0.0931072242253674	-0.2754108084676301	0.11045765522228276
H1	1887	562	65,69,84,87	0.02587313392405835	0.04726049801112871	0.5841563720064071	-0.15990742473461164	0.21165369258272834
H1	1887	562	65,69,84,112.1	0.03344501246411301	0.04714680549569466	0.4782133476439616	-0.15188862202063752	0.2187786469488635
H1	1887	562	65,69,85,87	-0.006362786431356127	0.04702296539685405	0.8923854990226467	-0.19120960669037557	0.1784840338276633
H1	1887	562	65,69,85,112.1	-0.06953276587248013	0.046871944634428585	0.13818942638851184	-0.2537859249812118	0.11472039323625151
H1	1887	562	65,69,87,112.1	0.012853829865780236	0.04661235113721983	0.782775277880205	-0.17037886972675576	0.19608652945831623
H1	1887	562	65,82,83,84	0.07794845148688143	0.052430183419776184	0.13732946112529176	-0.12815409030201175	0.2840509932757746
H1	1887	562	65,82,83,85	-0.07510277754907754	0.050500832242264475	0.13721068674066855	-0.2736210585982196	0.12341550350006453
H1	1887	562	65,82,83,87	0.028428761952172935	0.0491540097875162	0.5631187087805312	-0.1647951731085232	0.22165269701286905
H1	1887	562	65,82,83,112.1	-0.002952950605995888	0.04858003710268886	0.9515393894092741	-0.19392060461741212	0.18801470340542037
H1	1887	562	65,82,84,85	0.055331529524676126	0.05059978314693058	0.2743673083240794	-0.14357572656963624	0.2542387856189885
H1	1887	562	65,82,84,87	0.005807553434491852	0.04929720793040691	0.9062384822692975	-0.18797929213507905	0.19959439900406276
H1	1887	562	65,82,84,112.1	0.005998548978881968	0.04866418290076652	0.9019166253837285	-0.18529988134750172	0.19729697930526566
H1	1887	562	65,82,85,87	-0.13097520364544762	0.04838458362502616	0.0068774591197725225	-0.3211745319345364	0.05922412464364116
H1	1887	562	65,82,85,112.1	0.01966032234549575	0.04799386578210213	0.6821345039772336	-0.1690030978979511	0.2083237425889426
H1	1887	562	65,82,87,112.1	-0.007352210069708043	0.046877574902860174	0.8753959977609347	-0.19162750170895962	0.17692308156954353
H1	1887	562	65,83,84,85	0.08180861227097336	0.052431039500451235	0.11892572505672275	-0.12429729476273865	0.28791451930468537
H1	1887	562	65,83,84,87	0.10411238175124378	0.04833266680722134	0.03141383671558006	-0.0858828620313024	0.29410762553378994
H1	1887	562	65,83,84,112.1	-0.021756476367344096	0.04796897479790416	0.6502247998186221	-0.2103220503936653	0.1668090976589771
H1	1887	562	65,83,85,87	0.0533626524715092	0.04915987142544753	0.277901207587817	-0.13988432463096317	0.24660962957398158
H1	1887	562	65,83,85,112.1	0.004563344850859935	0.04858549883553457	0.925183721702141	-0.18642577917932507	0.19555246888104494
H1	1887	562	65,83,87,112.1	0.015798972596667724	0.04710405723500037	0.7373721116361661	-0.16936661889049098	0.20096456408382646
H1	1887	562	65,84,85,87	-0.023488664038751272	0.04929293890798749	0.6337884147880831	-0.21725872812265484	0.1702814000451523
H1	1887	562	65,84,85,112.1	0.024220700653091898	0.04865713317050291	0.6187195004666752	-0.16705001725209687	0.21549141855828066
H1	1887	562	65,84,87,112.1	-0.0065284038847923664	0.04715263059606333	0.8899037736199561	-0.19188493678251517	0.17882812901293044
H1	1887	562	65,85,87,112.1	0.014930302567694065	0.04688067420063305	0.7501751722513396	-0.16935717238100037	0.1992177775163885
H1	1887	562	66,69,82,83	-0.0005455365392429828	0.04897056855738346	0.9911133550780967	-0.19304836590598157	0.19195729282749563
H1	1887	562	66,69,82,84	0.041906767356542335	0.049098602210444854	0.3935238228487582	-0.15109936105683888	0.23491289576992355
H1	1887	562	66,69,82,85	0.07620836225048827	0.04831000210450478	0.11492239172470045	-0.11369778680581263	0.2661145113067892
H1	1887	562	66,69,82,87	0.009749158604009434	0.047161385925881476	0.836261011838671	-0.17564179141019134	0.1951401086182102
H1	1887	562	66,69,82,112.1	-0.03598040852356105	0.0468319481729873	0.4424532000992155	-0.22007634193083728	0.14811552488371518
H1	1887	562	66,69,83,84	-0.08896886154862835	0.04825935408472321	0.06547094531120244	-0.2786759137310927	0.10073819063383599
H1	1887	562	66,69,83,85	-0.006351306198237906	0.048984398325187646	0.8968552862651618	-0.19890850024789153	0.18620588785141573
H1	1887	562	66,69,83,87	-0.06811930626218465	0.04729738659782535	0.15003742930106606	-0.25404487359687444	0.11780626107250516
H1	1887	562	66,69,83,112.1	-0.011175364136215213	0.04712369720871786	0.8125774242980401	-0.19641816016930186	0.17406743189687146
H1	1887	562	66,69,84,85	0.015238484190645635	0.04908242233218094	0.7562544963490205	-0.1777040412784291	0.20818100965972036
H1	1887	562	66,69,84,87	0.07156590122844697	0.04737461033666975	0.1311190617112896	-0.11466323187359564	0.25779503433048956
H1	1887	562	66,69,84,112.1	-0.0215136053290656	0.0471689698567949	0.6483952809999178	-0.20693436770202722	0.16390715704389602
H1	1887	562	66,69,85,87	0.01261949995589784	0.047162126334978086	0.7890665863457962	-0.1727743605992704	0.19801336051106608
H1	1887	562	66,69,85,112.1	-0.016205080797042415	0.046833862294158736	0.7293885891144912	-0.2003085385960524	0.16789837700196758
H1	1887	562	66,69,87,112.1	0.027252999046662174	0.04665720570104476	0.5592448894245291	-0.15615602340061446	0.2106620214939388
H1	1887	562	66,82,83,84	0.12915314838893344	0.05184854916387563	0.0128611453164467	-0.0746629947892049	0.3329692915670718
H1	1887	562	66,82,83,85	0.16626900736473862	0.05029130598649667	0.0009713081255999697	-0.03142562800802831	0.3639636427375056
H1	1887	562	66,82,83,87	-0.02343253838285253	0.0491925651653923	0.6339085100976309	-0.21680803425950604	0.16994295749380098
H1	1887	562	66,82,83,112.1	-0.033230075675754825	0.04851823897064347	0.49352767569875466	-0.22395480183032218	0.1574946504788125
H1	1887	562	66,82,84,85	-0.19061986944162534	0.05047975751856596	0.00016631339069336735	-0.38905530595659926	0.007815567073348573
H1	1887	562	66,82,84,87	-0.040481940055260526	0.04940922241789703	0.412751485552297	-0.23470911348720142	0.15374523337668033
H1	1887	562	66,82,84,112.1	0.08348763345481942	0.04866346297318443	0.0864668123593955	-0.10780796684323148	0.27478323375287034
H1	1887	562	66,82,85,87	-0.0651164044164258	0.04843281821530003	0.17902701457814638	-0.2555053424113971	0.1252725335785455
H1	1887	562	66,82,85,112.1	-0.04046178376357763	0.0480363008700209	0.39976265311597026	-0.22929201592547743	0.1483684483983222
H1	1887	562	66,82,87,112.1	-0.0005697399924335517	0.04693108531273392	0.9903158044279736	-0.18505538053317272	0.18391590054830564
H1	1887	562	66,83,84,85	0.08397901850356068	0.05184961425556603	0.10554216868616963	-0.11984131153966782	0.2877993485467892
H1	1887	562	66,83,84,87	-0.01958990311407449	0.048339233478886245	0.6853526589268488	-0.20961096041915583	0.17043115419100685
H1	1887	562	66,83,84,112.1	0.04989170933785876	0.04798466899880532	0.29864914505488094	-0.13873555843977314	0.2385189771154907
H1	1887	562	66,83,85,87	-0.07159773699484442	0.0491930828924808	0.14578348562328663	-0.26497526805165433	0.12177979406196549
H1	1887	562	66,83,85,112.1	-0.04682816271046636	0.04851643515245576	0.33461974671837535	-0.23754579807325762	0.1438894726523249
H1	1887	562	66,83,87,112.1	-0.025282180404090124	0.04710299883595211	0.5915356172406334	-0.21044361133486994	0.15987925052668972
H1	1887	562	66,84,85,87	0.023512823797028307	0.049409148707794184	0.63423834825018	-0.1707140598812142	0.21773970747527083
H1	1887	562	66,84,85,112.1	0.06510625086092933	0.048664812836891745	0.18117469744319442	-0.1261946557382443	0.25640715746010295
H1	1887	562	66,84,87,112.1	0.011790650509463901	0.04720693002332188	0.8028076131969274	-0.17377933290942277	0.19736063392835057
H1	1887	562	66,85,87,112.1	-0.04770848979437142	0.04693428936726753	0.30957910233915525	-0.23220672544236248	0.13678974585361964
H1	1887	562	69,82,83,84	0.03274779435894851	0.05272566505830479	0.5346421081870334	-0.17451628288110085	0.24001187159899787
H1	1887	562	69,82,83,85	-0.013927411310629884	0.050507194952148775	0.782782292570029	-0.21247070411052857	0.1846158814892688
H1	1887	562	69,82,83,87	0.008167384124849228	0.04925352301366194	0.8683212683557908	-0.18544773646129203	0.20178250471099052
H1	1887	562	69,82,83,112.1	0.03934126154086029	0.04875262507486177	0.41983620475342764	-0.15230483411288695	0.23098735719460753
H1	1887	562	69,82,84,85	-0.016814511365661033	0.05064491294545521	0.7399358014456401	-0.2158991722596453	0.18227014952832324
H1	1887	562	69,82,84,87	-0.09204071826590068	0.049388080781090464	0.06259585926980281	-0.28618478412889553	0.10210334759709416
H1	1887	562	69,82,84,112.1	-0.04708390409051455	0.04881607791916047	0.33496312514132065	-0.23897943225890683	0.14481162407787773
H1	1887	562	69,82,85,87	0.011798362885983849	0.04848900464459608	0.8077948839224394	-0.178811443416833	0.2024081691888007
H1	1887	562	69,82,85,112.1	-0.04159928318173324	0.048166971733367335	0.38793788579819355	-0.23094318123829194	0.1477446148748255
H1	1887	562	69,82,87,112.1	-0.055789398215458516	0.04702966105683781	0.2357323669269792	-0.24066253904884172	0.1290837426179247
H1	1887	562	69,83,84,85	-0.014057145148972147	0.05274013128557768	0.789867887829122	-0.22137808898792632	0.19326379868998206
H1	1887	562	69,83,84,87	-0.06778414076763598	0.04844648148298721	0.16200052867280065	-0.2582267889351795	0.12265850739990755
H1	1887	562	69,83,84,112.1	0.06624421339121764	0.04813254070101701	0.16896518860245097	-0.12296433661158734	0.2554527633940226
H1	1887	562	69,83,85,87	-0.050647172872356344	0.0492508061288008	0.3039718882789896	-0.24425161341049653	0.14295726766578384
H1	1887	562	69,83,85,112.1	0.04667933021196624	0.04874780644812692	0.3384554215644775	-0.14494782346688778	0.23830648389082026
H1	1887	562	69,83,87,112.1	0.022990588545103094	0.04726372640824165	0.6267413566291755	-0.16280266091126167	0.20878383800146788
H1	1887	562	69,84,85,87	0.014283811030406546	0.0493931575295384	0.7724842630027595	-0.17988021148142863	0.20844783354224172
H1	1887	562	69,84,85,112.1	-0.08492726309982111	0.04881849464104623	0.08215209183207824	-0.27683229137847365	0.10697776517883141
H1	1887	562	69,84,87,112.1	0.008760998047813315	0.047319288764859656	0.8531425097759431	-0.177250666492761	0.19477266258838766
H1	1887	562	69,85,87,112.1	-0.08642339489650573	0.04703336304328009	0.06636121284181495	-0.27131108820263755	0.0984642984096261
H1	1887	562	82,83,84,85	0.22275974530568815	0.05268687046004332	2.5195372607557508e-05	0.015648169254607575	0.42987132135676875
H1	1887	562	82,83,84,87	-0.0949995679851211	0.053269352724597895	0.07475309147386024	-0.3044008761607391	0.11440174019049684
H1	1887	562	82,83,84,112.1	-0.09377310683378368	0.0512011432792086	0.06725556891891551	-0.2950443037673008	0.10749809009973343
H1	1887	562	82,83,85,87	0.19196509131115616	0.050654287229846245	0.00015759303689765318	-0.0071564198037204485	0.39108660242603277
H1	1887	562	82,83,85,112.1	0.07097449049373841	0.04993986409865592	0.15549418518209254	-0.12533863023134667	0.2672876112188235
H1	1887	562	82,83,87,112.1	-0.11487630279928347	0.04886834921123452	0.018882535644280985	-0.3069773089091279	0.07722470331056093
H1	1887	562	82,84,85,87	-0.04600526344894698	0.05078897052935547	0.36520000418572707	-0.24565621330606718	0.15364568640817322
H1	1887	562	82,84,85,112.1	-0.0713321433215538	0.05010251069643735	0.15476183843214264	-0.2682846262427937	0.1256203395996861
H1	1887	562	82,84,87,112.1	-0.029161419838733493	0.049046604286998176	0.5522354422507372	-0.22196314492008168	0.1636403052426147
H1	1887	562	82,85,87,112.1	-0.03165504224450946	0.04816175963694065	0.5111246444072874	-0.22097845160063798	0.15766836711161905
H1	1887	562	83,84,85,87	0.23280048876723358	0.05325699245863658	1.3318378419188612e-05	0.023447768677059028	0.44215320885740816
H1	1887	562	83,84,85,112.1	-0.08296919977147924	0.05119390466592308	0.10532312331867406	-0.28421194178647685	0.11827354224351838
H1	1887	562	83,84,87,112.1	-0.05919094797886334	0.04808489237608311	0.21855341503281053	-0.24821219287914306	0.12983029692141637
H1	1887	562	83,85,87,112.1	-0.05165237626454619	0.04887710131417017	0.2908043291636724	-0.2437877868060248	0.14048303427693243
H1	1887	562	84,85,87,112.1	0.006056147417093399	0.04903832752902272	0.9017312937939103	-0.18671304180904225	0.19882533664322904
H9	1842	562	Intercept	7.026743732869718
H9	1842	562	29	-0.23460353245117552	0.13446622181562953	0.0812766960265022	-0.7632464411697274	0.2940393762673764
H9	1842	562	35	0.41097108377098324	0.13696622746938866	0.002747258997243861	-0.12750039187516593	0.9494425594171324
H9	1842	562	65	-0.054637486612941266	0.13434062047881637	0.6842900114595577	-0.5827866039901786	0.473511630764296
H9	1842	562	66	0.08102278344817282	0.1343592951654702	0.5465950771160633	-0.4471997519260811	0.6092453188224267
H9	1842	562	69	-0.13125966509251352	0.13648112099320683	0.3363607178431436	-0.6678239844644379	0.40530465427941087
H9	1842	562	82	-0.0653036461794283	0.13439334817879373	0.6271111173636725	-0.5936600581791343	0.46305276582027766
H9	1842	562	83	-0.2945171971599199	0.1359585467114381	0.03047786528739673	-0.8290270586568063	0.23999266433696648
H9	1842	562	84	0.14817135034327877	0.14132667922169823	0.29463774000755616	-0.4074428832873138	0.7037855839738714
H9	1842	562	85	-0.09488560160189052	0.13445084661775086	0.4804863011007008	-0.6234680639925918	0.43369686078881076
H9	1842	562	87	-0.07782193213292521	0.1341592282597092	0.561968557651552	-0.6052579208966493	0.4496140566307989
H9	1842	562	112.1	0.0354402010911965	0.1342426148746132	0.7918215502653749	-0.4923236153013242	0.5632040174837172
H9	1842	562	29,35	1.818103693446183	0.14193315830673095	1.9627939405197772e-35	1.260105137096772	2.376102249795594
H9	1842	562	29,65	0.06330034125012451	0.13951523713260555	0.6501099252855905	-0.48519235656260185	0.6117930390628509
H9	1842	562	29,66	-0.14888414796954857	0.14133142191464168	0.2923382738675483	-0.704517027107979	0.40674873116888194
H9	1842	562	29,69	0.08658493492201697	0.1407159946972769	0.5384548140726035	-0.4666284426501513	0.6397983124941853
H9	1842	562	29,82	1.6780041565071686	0.1385753735743099	4.955522344307622e-32	1.133206455092402	2.2228018579219353
H9	1842	562	29,83	0.4713719976250366	0.14512118468257246	0.001191819392198429	-0.09916002262066131	1.0419040178707346
H9	1842	562	29,84	0.061411119441410256	0.14608342164032098	0.6742755842578855	-0.5129038563848953	0.635726095267716
H9	1842	562	29,85	0.2903858402167909	0.13871394215306204	0.036508519880230454	-0.2549566321861052	0.835728312619687
H9	1842	562	29,87	0.5868003526762349	0.1407444627457605	3.261445441054941e-05	0.033475055309245993	1.1401256500432237
H9	1842	562	29,112.1	0.14813426948951786	0.14137533360777918	0.29492467535057393	-0.4076712448644599	0.7039397838434955
H9	1842	562	35,65	0.08197827466510038	0.14328910952859047	0.5673425159281159	-0.4813510925625037	0.6453076418927044
H9	1842	562	35,66	-0.042368407973385036	0.14344168711719837	0.7677589560093008	-0.6062976214609482	0.5215608055141782
H9	1842	562	35,69	0.3530220043253713	0.1449886735737813	0.015034882100418631	-0.2169890593779103	0.9230330680286529
H9	1842	562	35,82	1.3270661891839393	0.1404795647991267	1.5994116126374835e-20	0.7747823163407543	1.8793500620271242
H9	1842	562	35,83	0.09808652803441431	0.15408847391472497	0.5245254328906377	-0.5076996534348025	0.7038727095036311
H9	1842	562	35,84	-1.0440814553464355	0.14805265266244824	2.8762511364912785e-12	-1.6261383012232251	-0.46202460946964574
H9	1842	562	35,85	1.1242237350390702	0.14041829994640026	2.634415301642177e-15	0.5721807199333172	1.6762667501448232
H9	1842	562	35,87	1.235486764719001	0.14232029857948073	1.1734627836417963e-17	0.675966198179186	1.7950073312588162
H9	1842	562	35,112.1	0.38826331445777723	0.14288751204911151	0.006671141242830551	-0.17348720525839095	0.9500138341739455
H9	1842	562	65,66	-0.056045537762271	0.14019138944306295	0.6893861873832932	-0.6071964728580159	0.495105397333474
H9	1842	562	65,69	0.12057665038476648	0.14055899589690166	0.3911432919007387	-0.4320194992964487	0.6731728000659817
H9	1842	562	65,82	0.31202138997820883	0.13940523369374616	0.02537726037041471	-0.23603883834811068	0.8600816183045283
H9	1842	562	65,83	0.022098044627848645	0.14417319524752914	0.8782061310593102	-0.5447070330027524	0.5889031222584495
H9	1842	562	65,84	-0.03773641664937752	0.14516489863711418	0.7949398915637784	-0.6084402947175718	0.5329674614188167
H9	1842	562	65,85	-0.018956005543803278	0.1387492304018977	0.8913521631798478	-0.5644372107991302	0.5265251997115237
H9	1842	562	65,87	0.07471000275674072	0.13931408350616753	0.591864947647976	-0.47299187609235555	0.622411881605837
H9	1842	562	65,112.1	0.24199402087139	0.1393634277676602	0.08272946621730715	-0.3059018508896201	0.7898898926324001
H9	1842	562	66,69	-0.018937898086058946	0.1400150323733206	0.8924305977739402	-0.5693954998445329	0.531519703672415
H9	1842	562	66,82	-0.3705913661797793	0.13917772902929426	0.007848352863106279	-0.9177571786004612	0.17657444624090268
H9	1842	562	66,83	-0.13913002250565365	0.14451472125017717	0.33586013305764817	-0.707277781569592	0.4290177365582847
H9	1842	562	66,84	0.02165019245653188	0.14515856494728316	0.8814598955039701	-0.5490287852302135	0.5923291701432772
H9	1842	562	66,85	0.0434227973865573	0.13955240272854855	0.7557314439507006	-0.5052160139145847	0.5920616086876993
H9	1842	562	66,87	0.05919222142781244	0.13927425050705208	0.670904628225814	-0.4883530572563425	0.6067375001119674
H9	1842	562	66,112.1	-0.10923042706549196	0.1409322648483192	0.43844959979360465	-0.6632940529764049	0.4448331988454209
H9	1842	562	69,82	0.27893596968542234	0.13976524663248405	0.04617315274686392	-0.27053961994532694	0.8284115593161716
H9	1842	562	69,83	0.18877571762190037	0.1425156456024427	0.18554147513737151	-0.37151283969681625	0.749064274940617
H9	1842	562	69,84	0.058085592445627277	0.14575272787429688	0.6903122963106463	-0.5149292879960861	0.6311004728873406
H9	1842	562	69,85	0.18053808966181972	0.13931803897190806	0.19525384042642205	-0.36717933977601314	0.7282555190996526
H9	1842	562	69,87	0.13369897022248955	0.14030104882103106	0.3407986206054785	-0.4178830817125224	0.6852810221575015
H9	1842	562	69,112.1	0.031934189797267476	0.14016571426703986	0.8198134862068885	-0.5191158054523851	0.5829841850469201
H9	1842	562	82,83	2.297527658655054	0.14695988627185982	1.4883835206346525e-50	1.7197669341050212	2.875288383205087
H9	1842	562	82,84	0.06155457196234859	0.1456365070400061	0.6726151063933901	-0.5110033958133912	0.6341125397380883
H9	1842	562	82,85	0.4816389163996469	0.14415612501099687	0.0008585583984184611	-0.08509905099783316	1.048376883797127
H9	1842	562	82,87	0.21785098458033364	0.1382793063044713	0.1154016359307188	-0.32578275267607043	0.7614847218367378
H9	1842	562	82,112.1	0.8639806773739032	0.1386387041133238	6.242901933389554e-10	0.31893399714569937	1.409027357602107
H9	1842	562	83,84	0.27598224871093247	0.1490795387879401	0.06436500997270708	-0.31011171564046625	0.8620762130623312
H9	1842	562	83,85	0.37945315278366454	0.1469142210866486	0.009909773477537277	-0.19812804284072982	0.9570343484080589
H9	1842	562	83,87	0.2960204656428318	0.14451346780522992	0.040725063900635	-0.2721223656052292	0.8641632968908928
H9	1842	562	83,112.1	0.0854757216966302	0.14272134185503454	0.5493459651396826	-0.47562151354740023	0.6465729569406606
H9	1842	562	84,85	-0.17017446113828144	0.14566218402096978	0.2429107106597448	-0.7428333758560894	0.4024844535795265
H9	1842	562	84,87	-0.39736724804580636	0.14453154593392303	0.006055438941343437	-0.9655811519722506	0.17084665588063785
H9	1842	562	84,112.1	-0.1401397047973798	0.1453660381265992	0.33520441397695444	-0.7116343462509342	0.43135493665617464
H9	1842	562	85,87	0.6064832105673751	0.13874635645613662	1.3359424950315688e-05	0.06101330399379978	1.1519531171409505
H9	1842	562	85,112.1	-0.16369382905932717	0.1386057952519071	0.2378210134742857	-0.708611130801343	0.38122347268268864
H9	1842	562	87,112.1	0.09956332176263566	0.13899934797842756	0.4739452737497193	-0.4469012002051938	0.6460278437304652
H9	1842	562	29,35,65	-0.10943418225998408	0.12709471506860096	0.38937489433442896	-0.6090966175498205	0.3902282530298523
H9	1842	562	29,35,66	0.07091141953572122	0.12862722734243828	0.5815283638427036	-0.43477596190898715	0.5765988009804296
H9	1842	562	29,35,69	-0.34621027250319275	0.1275856188836696	0.006745926083924346	-0.8478026558290106	0.15538211082262504
H9	1842	562	29,35,82	-2.6506814567488073	0.12637184699059595	3.355529434402357e-84	-3.1475019955518047	-2.15386091794581
H9	1842	562	29,35,83	-0.6402797638980315	0.1326324605193202	1.5492330069474868e-06	-1.1617133906683954	-0.11884613712766767
H9	1842	562	29,35,84	0.951237854026651	0.1319781901426858	9.707956781442928e-13	0.43237643751342236	1.4700992705398797
H9	1842	562	29,35,85	-1.0425020710876982	0.12648307862364344	4.1426307667891116e-16	-1.5397599079216937	-0.5452442342537027
H9	1842	562	29,35,87	-1.3373462271983239	0.12724089123688204	7.68821509558079e-25	-1.8375833420897885	-0.8371091123068594
H9	1842	562	29,35,112.1	-0.49080183669965227	0.12823448274110774	0.0001357697931707802	-0.994945174996368	0.013341501597063488
H9	1842	562	29,65,66	-0.06364028235552896	0.12698065221175425	0.6163299651562689	-0.5628542888905003	0.4355737241794424
H9	1842	562	29,65,69	-0.026880222647031132	0.12661158876695647	0.8319032095190091	-0.5246432865562247	0.4708828412621624
H9	1842	562	29,65,82	-0.1745584685629094	0.12518004419009954	0.1634209413708973	-0.6666935325264545	0.31757659540063565
H9	1842	562	29,65,83	0.08303930221844302	0.1293824824318249	0.5211098099055946	-0.42561730258873387	0.5916959070256199
H9	1842	562	29,65,84	0.046951942771742916	0.13019166875186688	0.7184302739623454	-0.46488591160239795	0.5587897971458837
H9	1842	562	29,65,85	0.2130003799397111	0.12530445615077396	0.08939968978123833	-0.27962379943053056	0.7056245593099528
H9	1842	562	29,65,87	0.00038829596933001587	0.1262673138271199	0.997546836500522	-0.4960212792857117	0.4967978712243718
H9	1842	562	29,65,112.1	-0.06930644569066916	0.12668658962588422	0.5844259324274015	-0.5673643693176759	0.4287514779363375
H9	1842	562	29,66,69	0.14380931273894626	0.12798971420992458	0.2613932089868472	-0.35937173817778456	0.6469903636556771
H9	1842	562	29,66,82	0.22973990407289901	0.1262917707472953	0.0691266556213574	-0.2667658215554131	0.7262456297012112
H9	1842	562	29,66,83	0.07536390614617744	0.1315005022375997	0.5666726655245296	-0.44161951959587714	0.592347331888232
H9	1842	562	29,66,84	0.0997788978467904	0.13132156516365004	0.4475105390731998	-0.4165010514833216	0.6160588471769024
H9	1842	562	29,66,85	0.10030302149373957	0.12680113233218457	0.4290752282421366	-0.398205217376854	0.5988112603643331
H9	1842	562	29,66,87	-0.09001655755128182	0.12737551957229684	0.4798801964037819	-0.5907829526877673	0.41074983758520367
H9	1842	562	29,66,112.1	0.04844217904054013	0.12895806122000383	0.7072446410666899	-0.45854584862577985	0.5554302067068602
H9	1842	562	29,69,82	-0.19079934138662444	0.12592986473383597	0.1299879337773542	-0.6858822632426985	0.3042835804694496
H9	1842	562	29,69,83	0.03686392192594298	0.1303584637836649	0.777384413945849	-0.47562967341852425	0.5493575172704103
H9	1842	562	29,69,84	-0.06949285670687808	0.13038031075924986	0.5941253013262837	-0.5820723416417867	0.44308662822803047
H9	1842	562	29,69,85	0.004538299024675951	0.12610767857375613	0.9712979439991687	-0.49124368334099355	0.5003202813903455
H9	1842	562	29,69,87	0.04849930211369771	0.12696948782567455	0.7025425422521026	-0.45067081255421926	0.5476694167816147
H9	1842	562	29,69,112.1	-0.07453220834635263	0.12698390098942564	0.5573460415162586	-0.5737589871839498	0.4246945704912445
H9	1842	562	29,82,83	-1.799726569283169	0.1338218849609081	1.1563832378005574e-38	-2.3258363205702466	-1.2736168179960912
H9	1842	562	29,82,84	-0.1020986150569046	0.1307152250938857	0.43490182428928104	-0.6159947881953101	0.4117975580815008
H9	1842	562	29,82,85	-0.3142420529816371	0.1288930598099837	0.014903836357993349	-0.8209745329423708	0.19249042697909657
H9	1842	562	29,82,87	-0.4710387573056319	0.1258879882610726	0.00019085030141058156	-0.9659570452479275	0.023879530636663704
H9	1842	562	29,82,112.1	-0.42983532183186435	0.1258838815506126	0.0006588933700451945	-0.924737464579229	0.06506682091550031
H9	1842	562	29,83,84	0.8618273276247884	0.13531080406678028	2.6429465469878764e-10	0.329864013142828	1.3937906421067487
H9	1842	562	29,83,85	-0.19415966387915057	0.13426923562934867	0.1484087421299772	-0.7220281375828206	0.3337088098245195
H9	1842	562	29,83,87	0.13027944250566942	0.13042306096925152	0.31803249942881745	-0.3824681113692187	0.6430269963805575
H9	1842	562	29,83,112.1	0.2093815589124361	0.13003617986425683	0.10760529214412584	-0.30184500366879413	0.7206081214936664
H9	1842	562	29,84,85	-0.1169170714734124	0.13097598020459256	0.3722068468204832	-0.6318383819163842	0.39800423896955944
H9	1842	562	29,84,87	-0.16440811575867426	0.13054921984733328	0.20813089264932924	-0.6776516529025893	0.34883542138524076
H9	1842	562	29,84,112.1	-0.12261390524788959	0.1309142230831739	0.34914242510899185	-0.6372924226394913	0.392064612143712
H9	1842	562	29,85,87	0.3261530029463347	0.12606688867516513	0.009786997025335501	-0.16946861728268575	0.8217746231753551
H9	1842	562	29,85,112.1	0.28436024905436436	0.12618116509458002	0.024390794972739934	-0.21171063953322022	0.7804311376419489
H9	1842	562	29,87,112.1	0.016976813942204044	0.12712319598133343	0.8937824577455509	-0.48279759171719094	0.5167512196015991
H9	1842	562	35,65,66	0.14205197282630305	0.12799775290528906	0.26729344480635653	-0.3611606815611165	0.6452646272137226
H9	1842	562	35,65,69	-0.20720499403408862	0.12752022140939284	0.10443442214745667	-0.70854027256022	0.2941302844920427
H9	1842	562	35,65,82	-0.18392909565621954	0.1266981731991122	0.1468271064924843	-0.6820325591501304	0.31417436783769137
H9	1842	562	35,65,83	-0.05144707585731645	0.13234588594403943	0.6975390875248711	-0.5717540582184328	0.46885990650379994
H9	1842	562	35,65,84	0.008196818456124605	0.1317506910225459	0.9504016374087929	-0.5097702039484737	0.526163840860723
H9	1842	562	35,65,85	-0.1860532060707235	0.12667312243200066	0.142141909387548	-0.6840581845309013	0.31195177238945426
H9	1842	562	35,65,87	-0.0990322178632222	0.12696447306154	0.43553540849263395	-0.598182617397756	0.4001181816713116
H9	1842	562	35,65,112.1	-0.14629010836890424	0.1275922480661757	0.25178447278083504	-0.6479085537813571	0.3553283370435487
H9	1842	562	35,66,69	0.018338636054923557	0.12795185823048238	0.8860564665748567	-0.48469358718735867	0.5213708592972058
H9	1842	562	35,66,82	0.20564652562719554	0.12723460770378758	0.10628058982003248	-0.2945658860699111	0.7058589373243022
H9	1842	562	35,66,83	0.07744605700473434	0.133976166236355	0.5633263265278305	-0.44927023844720365	0.6041623524566724
H9	1842	562	35,66,84	-0.1915030138441814	0.13261426600599405	0.14896669171810278	-0.7128651103795347	0.32985908269117187
H9	1842	562	35,66,85	-0.24685480547192473	0.12741275819919928	0.05291111542710711	-0.7477676012120457	0.2540579902681962
H9	1842	562	35,66,87	-0.10695202622215458	0.12760927666223007	0.40211917240143835	-0.6086374181616091	0.3947333657172999
H9	1842	562	35,66,112.1	0.35769505059483	0.1292523724476811	0.005731661872449267	-0.15045003749430141	0.8658401386839614
H9	1842	562	35,69,82	-0.38775499093888915	0.1269527407275308	0.002302264898714842	-0.8868592657657236	0.1113492838879453
H9	1842	562	35,69,83	-0.06421898974944704	0.13254332914518246	0.6281046085587607	-0.5853022038418458	0.4568642243429517
H9	1842	562	35,69,84	0.09371965736627982	0.13201993917731641	0.4779015450709908	-0.4253058920481734	0.6127452067807331
H9	1842	562	35,69,85	-0.16285548852465914	0.12693635261108904	0.19973496058511234	-0.661895334817493	0.3361843577681747
H9	1842	562	35,69,87	-0.18247073755658538	0.12736340306962862	0.15219406999353804	-0.6831894976578364	0.31824802254466567
H9	1842	562	35,69,112.1	-0.11478691858582055	0.12773944100072063	0.3690336886373906	-0.6169840409329712	0.38741020376133006
H9	1842	562	35,82,83	-1.4072230436396342	0.13776242168633168	1.3302606304578087e-23	-1.9488246914663236	-0.8656213958129448
H9	1842	562	35,82,84	0.4220702721227021	0.1326837230907931	0.0015027829115798886	-0.09956488923773144	0.9437054334831356
H9	1842	562	35,82,85	-0.8462935607894299	0.12971414800417227	9.816487861901637e-11	-1.3562540815579545	-0.33633304002090525
H9	1842	562	35,82,87	-0.7519589234737944	0.12648544984335633	3.560060474767881e-09	-1.249226082563367	-0.254691764384222
H9	1842	562	35,82,112.1	-0.8692705762924317	0.12682530792546845	1.112921815167965e-11	-1.367873859522724	-0.37066729306213925
H9	1842	562	35,83,84	0.4987354478755005	0.13884610952366744	0.0003405828099127961	-0.04712662969136261	1.0445975254423636
H9	1842	562	35,83,85	-0.01146621712728213	0.1378371175078199	0.9337160822439781	-0.5533615254421409	0.5304290911875766
H9	1842	562	35,83,87	-0.3665035852590294	0.13316492416925693	0.006002260829904519	-0.8900305491432701	0.15702337862521132
H9	1842	562	35,83,112.1	0.38631634829507844	0.13266801428488734	0.0036546170570244704	-0.1352570551849418	0.9078897517750987
H9	1842	562	35,84,85	-0.06151273160079765	0.13264335665053498	0.6429090954510805	-0.5829891956162434	0.45996373241464816
H9	1842	562	35,84,87	0.10733433976209417	0.1321002113814171	0.41664320564870505	-0.41200679323083733	0.6266754727550257
H9	1842	562	35,84,112.1	0.14761599783932403	0.1324736230595733	0.26535762119421585	-0.37319317250175754	0.6684251681804055
H9	1842	562	35,85,87	-1.0174127415726442	0.1265448975171727	2.028816416301149e-15	-1.5149136143099902	-0.5199118688352982
H9	1842	562	35,85,112.1	-0.25051775389128605	0.12690131624883338	0.04858342271490986	-0.7494198576030935	0.24838434982052143
H9	1842	562	35,87,112.1	-0.3715483382358201	0.12731927063244725	0.0035816264158839654	-0.8720935952844429	0.12899691881280262
H9	1842	562	65,66,69	-0.007773851542355215	0.1261630622598634	0.9508770659211254	-0.503773570321854	0.4882258672371435
H9	1842	562	65,66,82	-0.0994033303303209	0.12533810103687182	0.42787731291234765	-0.5921597818073424	0.3933531211467006
H9	1842	562	65,66,83	0.09496379367540869	0.1292383497914375	0.4625984734783044	-0.41312616549223985	0.6030537528430573
H9	1842	562	65,66,84	0.08659623806038177	0.12984970802499687	0.5049588231489104	-0.4238972257978425	0.597089701918606
H9	1842	562	65,66,85	0.02883537144037024	0.1255881713349643	0.8184372647537121	-0.46490421087785977	0.5225749537586002
H9	1842	562	65,66,87	-0.0015394743454458237	0.12594542088221222	0.9902493293088119	-0.49668355392139213	0.4936046052305005
H9	1842	562	65,66,112.1	-0.0973218152282479	0.12671300884663617	0.4425996674288518	-0.5954836038520976	0.4008399733956019
H9	1842	562	65,69,82	-0.036879567178608824	0.12522248338610134	0.7684141867801624	-0.5291814773561334	0.4554223429989158
H9	1842	562	65,69,83	-0.05749704983504361	0.1291869952874961	0.6563455737803372	-0.5653851129876721	0.45039101331758485
H9	1842	562	65,69,84	0.03038546723631419	0.12988994281965482	0.8150748610356326	-0.4802661764130314	0.5410371108856598
H9	1842	562	65,69,85	-0.03813467571239626	0.12513722316454354	0.7606115414797032	-0.5301013923304253	0.4538320409056328
H9	1842	562	65,69,87	-0.0854823755573467	0.12619729414855857	0.49829305917478517	-0.581616674196132	0.4106519230814386
H9	1842	562	65,69,112.1	-0.12390224114175585	0.1261709868359072	0.3262763171910207	-0.6199331147412055	0.37212863245769384
H9	1842	562	65,82,83	-0.19495781828674763	0.1324753016053378	0.14136011925981404	-0.7157735876926603	0.32585795111916505
H9	1842	562	65,82,84	-0.030722568918965493	0.13073159855605032	0.8142425028165176	-0.5446831129792844	0.48323797514135336
H9	1842	562	65,82,85	-0.10050293697133109	0.12834198372569466	0.4337208927143439	-0.6050689065609827	0.40406303261832055
H9	1842	562	65,82,87	-0.08591634388287261	0.12516734860487252	0.49257779123892864	-0.5780014961956577	0.4061688084299124
H9	1842	562	65,82,112.1	-0.08717617161564706	0.1249683929499266	0.4855629764233753	-0.578479146109226	0.4041268028779319
H9	1842	562	65,83,84	0.0035520830577361606	0.1340476452389251	0.9788637324100387	-0.5234452262229593	0.5305493923384316
H9	1842	562	65,83,85	0.11223485406513467	0.1326227601046874	0.39755951677114687	-0.4091606363216972	0.6336303444519665
H9	1842	562	65,83,87	-0.06748779028307356	0.129209344069267	0.6015424211499518	-0.575463715835955	0.44048813526980796
H9	1842	562	65,83,112.1	-0.15195838717283827	0.12843503259435265	0.23696792921257515	-0.6568901707484571	0.3529733964027806
H9	1842	562	65,84,85	-0.01368627336300604	0.13078981117595	0.9166752738637189	-0.5278756755580474	0.5005031288320354
H9	1842	562	65,84,87	0.03928757679481737	0.12929615849268783	0.7612860240297321	-0.46902965253455337	0.547604806124188
H9	1842	562	65,84,112.1	-0.16953130276925896	0.1297596277744341	0.19161636436485202	-0.6796706235197747	0.3406080179812567
H9	1842	562	65,85,87	0.11356987606106828	0.12516965602624178	0.36440439399200464	-0.3785243476893448	0.6056640998114813
H9	1842	562	65,85,112.1	-0.05480993732443962	0.1250485097323643	0.661235973289132	-0.5464278843689921	0.4368080097201129
H9	1842	562	65,87,112.1	-0.09281802040496454	0.12581373986234085	0.4608067534958903	-0.5874444068649156	0.4018083660549866
H9	1842	562	66,69,82	-0.09807422205141597	0.12529776159268366	0.4339309089847002	-0.5906720823162819	0.39452363821345
H9	1842	562	66,69,83	0.27457046265260043	0.1296894415710166	0.034440583164303554	-0.23529292680286185	0.7844338521080627
H9	1842	562	66,69,84	-0.15901639351483354	0.12978873400451213	0.2207274906916927	-0.669270143018701	0.35123735598903394
H9	1842	562	66,69,85	-0.08072808762109276	0.12556040850047334	0.5203767464988114	-0.5743585226354021	0.4129023473932165
H9	1842	562	66,69,87	0.010801667910987606	0.12625247479091514	0.9318326866842581	-0.485549568891795	0.5071529047137702
H9	1842	562	66,69,112.1	0.10712066394631853	0.12679252332658003	0.39835247392935347	-0.3913537293257113	0.6055950572183484
H9	1842	562	66,82,83	0.3469963001404216	0.13268150435954418	0.00902081881107821	-0.17463013846030873	0.8686227387411519
H9	1842	562	66,82,84	-0.07851274837066957	0.1302057326260607	0.5466221944875469	-0.5904058937112797	0.4333803969699406
H9	1842	562	66,82,85	0.17153328496745623	0.12816569794116056	0.18101312790681595	-0.3323396315368665	0.675406201471779
H9	1842	562	66,82,87	0.09405811980677137	0.12508485602612035	0.4522166682891614	-0.3977027197069299	0.5858189593204726
H9	1842	562	66,82,112.1	-0.1849443835277092	0.1259639897775708	0.14228685285896794	-0.6801614651908824	0.310272698135464
H9	1842	562	66,83,84	-0.0210309985512957	0.1343190732831875	0.8756045586391308	-0.5490954048983712	0.5070334077957799
H9	1842	562	66,83,85	-0.053634773007658954	0.13317404209548628	0.6872053244393304	-0.5771975832701073	0.4699280372547894
H9	1842	562	66,83,87	-0.25013382452503163	0.1295178544170038	0.05367035921021095	-0.7593226331752085	0.25905498412514527
H9	1842	562	66,83,112.1	0.08787070142342907	0.13001776793462888	0.49926679292234766	-0.42328347616845424	0.5990248790153123
H9	1842	562	66,84,85	-0.14277382055209764	0.13053598136945316	0.2742701199488733	-0.6559653117073692	0.3704176706031739
H9	1842	562	66,84,87	0.05726572343929914	0.12964415057371595	0.6587703021863194	-0.4524196081795667	0.566951055058165
H9	1842	562	66,84,112.1	0.05728599067676371	0.13107743119411808	0.662156555242132	-0.4580341660003849	0.5726061473539124
H9	1842	562	66,85,87	0.19643519430647693	0.12560059741120294	0.11807249170711755	-0.29735324011005737	0.6902236287230112
H9	1842	562	66,85,112.1	0.10249073123890495	0.12632857498705527	0.4173426129319042	-0.3941596872356638	0.5991411497134738
H9	1842	562	66,87,112.1	-0.10595882137239776	0.12661492857281073	0.4028281319234627	-0.6037350154540428	0.3918173727092474
H9	1842	562	69,82,83	-0.2979750177072966	0.13206958060085996	0.024226455785149068	-0.8171957283018637	0.22124569288727047
H9	1842	562	69,82,84	0.004350259128202194	0.13050796362347405	0.9734140079473834	-0.5087310825595663	0.5174316008159707
H9	1842	562	69,82,85	-0.0030607809737426828	0.12808492215236772	0.9809388930299973	-0.5066161340977242	0.5004945721502387
H9	1842	562	69,82,87	-0.11730926432825833	0.12540176760117913	0.3497239290171722	-0.6103160156745636	0.37569748701804695
H9	1842	562	69,82,112.1	-0.09584317630611161	0.12492378578974613	0.44309625946269937	-0.5869707814125755	0.39528442880035236
H9	1842	562	69,83,84	-0.21596514955319568	0.1345859570596527	0.10881459881662046	-0.7450787875509811	0.31314848844458976
H9	1842	562	69,83,85	-0.11615998672772865	0.13226731280842216	0.3799883894924784	-0.636158065258582	0.4038380918031247
H9	1842	562	69,83,87	0.11028104634092709	0.12960453254248036	0.394981696483802	-0.3992485302415639	0.619810622923418
H9	1842	562	69,83,112.1	-0.05626821489309575	0.12847293064090373	0.6614767063216178	-0.5613489915265473	0.4488125617403558
H9	1842	562	69,84,85	-0.11214769616720222	0.13062219590175242	0.3907410852787043	-0.6256781326762815	0.40138274034187704
H9	1842	562	69,84,87	-0.04571408540879365	0.12947285756774038	0.7240877091834057	-0.5547259926412271	0.4632978218236399
H9	1842	562	69,84,112.1	0.06427905609350121	0.12973656596365477	0.6203617095188658	-0.44576959904176866	0.574327711228771
H9	1842	562	69,85,87	-0.017805725601509004	0.1255283930982481	0.8872238120509292	-0.5113102946910706	0.47569884348805264
H9	1842	562	69,85,112.1	-0.03336907596518143	0.12508620886577718	0.7896902823482311	-0.5251352340568984	0.4583970821265356
H9	1842	562	69,87,112.1	-0.129714852428983	0.12596658194089855	0.3033190661836809	-0.624942124969411	0.365512420111445
H9	1842	562	82,83,84	-0.3293588182407359	0.14103980259171808	0.01968585852078992	-0.8838452199588351	0.2251275834773634
H9	1842	562	82,83,85	-0.6885598093589436	0.14298750951949632	1.6431336275767732e-06	-1.2507034609181495	-0.12641615779973747
H9	1842	562	82,83,87	-0.7686822414899763	0.13536765041864404	1.67992516676853e-08	-1.3008690427360738	-0.23649544024387892
H9	1842	562	82,83,112.1	-0.7800489375388175	0.1313398310422436	3.6860755315446253e-09	-1.2964006976706284	-0.2636971774070067
H9	1842	562	82,84,85	0.27276385094470845	0.1370377570027684	0.046756138294611414	-0.26598883718792665	0.8115165390773436
H9	1842	562	82,84,87	0.05419640803452186	0.12953394757018985	0.6757282344290592	-0.4550556695258383	0.563448485594882
H9	1842	562	82,84,112.1	0.1263859874571761	0.13041083653901772	0.33265984443812957	-0.3863135070741165	0.6390854819884687
H9	1842	562	82,85,87	0.20049970517257834	0.12967534079700285	0.12231148152137816	-0.3093082482478028	0.7103076585929594
H9	1842	562	82,85,112.1	-0.39148285209737865	0.12770217748004542	0.0022178770246767694	-0.8935334759730704	0.11056777177831312
H9	1842	562	82,87,112.1	-0.24526748461070141	0.1248445737816381	0.04967862080781272	-0.736083674212169	0.2455487049907662
H9	1842	562	83,84,85	-0.26591979042213776	0.14112674732094704	0.05975597352880602	-0.8207480082033102	0.28890842735903466
H9	1842	562	83,84,87	0.10557856133180857	0.13380234007398245	0.4302209388364636	-0.42045435083734484	0.6316114735009619
H9	1842	562	83,84,112.1	0.08866693084521987	0.1333027266453747	0.5060713984287295	-0.4354017921575554	0.6127356538479951
H9	1842	562	83,85,87	-0.22599727686284443	0.1357968824841539	0.09631118662226747	-0.7598715687260094	0.3078770150003205
H9	1842	562	83,85,112.1	0.0013418567275174098	0.13168552739928774	0.991871398794506	-0.5163689802434701	0.5190526936985049
H9	1842	562	83,87,112.1	-0.037985658789750076	0.1286402036396891	0.7678232546656709	-0.5437240554814882	0.46775273790198796
H9	1842	562	84,85,87	-0.1332712223910903	0.12963858974341594	0.304134062807362	-0.6429346920622865	0.37639224728010584
H9	1842	562	84,85,112.1	0.22656835275659024	0.13049721111794363	0.08277031981224765	-0.2864707163386798	0.7396074218518603
H9	1842	562	84,87,112.1	0.05916162331498109	0.1296413051930635	0.6482167676150183	-0.450512521923512	0.5688357685534742
H9	1842	562	85,87,112.1	0.04774881516011367	0.1251778494256981	0.7029343065142801	-0.4443776202674209	0.5398752505876483
H9	1842	562	29,35,65,66	-0.0028197145595063033	0.08445836188869105	0.9733720951885514	-0.3348608286146056	0.329221399495593
H9	1842	562	29,35,65,69	0.07597068254723549	0.08440697760148426	0.3682617906600193	-0.2558684184023816	0.4078097834968526
H9	1842	562	29,35,65,82	0.04757822403027623	0.08513691629008335	0.5763661892598053	-0.2871305709310929	0.38228701899164536
H9	1842	562	29,35,65,83	-0.060776369977899536	0.08541580061023597	0.4768821415877673	-0.39658157574200265	0.2750288357862036
H9	1842	562	29,35,65,84	0.028582505206834752	0.08563201203033056	0.7385980262379466	-0.308072718000115	0.3652377284137845
H9	1842	562	29,35,65,85	-0.03546064323271539	0.08510419193773754	0.6769872595924888	-0.3700407850901567	0.299119498624726
H9	1842	562	29,35,65,87	0.04312138219965983	0.08450986194323876	0.6099624360282458	-0.2891222000907156	0.37536496449003526
H9	1842	562	29,35,65,112.1	0.06020694272307342	0.08437563119234226	0.4756303509088421	-0.2715089223931652	0.39192280783931205
H9	1842	562	29,35,66,69	-0.06348075677203852	0.08464586420739277	0.45341843355523936	-0.3962590207954463	0.26929750725136925
H9	1842	562	29,35,66,82	-0.19955358559777006	0.08534560321635305	0.01953112351039699	-0.5350828160724238	0.1359756448768837
H9	1842	562	29,35,66,83	0.18055328482648328	0.08564393800156613	0.035208921740141653	-0.1561488243570198	0.5172553940099863
H9	1842	562	29,35,66,84	0.02415753217461024	0.0859624925210578	0.7787373328221544	-0.31379694794261637	0.36211201229183687
H9	1842	562	29,35,66,85	0.009881665102395243	0.08531429315982868	0.90780813124651	-0.3255244724562109	0.3452878026610014
H9	1842	562	29,35,66,87	0.06596719197517417	0.08476215667699544	0.4365582239834872	-0.2672682663425532	0.3992026502929015
H9	1842	562	29,35,66,112.1	-0.2010880333600693	0.08457951259087164	0.017576510668311687	-0.5336054414519108	0.13142937473177219
H9	1842	562	29,35,69,82	0.32159069685515074	0.08545273309094008	0.0001752233931618324	-0.01435970592394975	0.6575410996342512
H9	1842	562	29,35,69,83	-0.1340462637719888	0.08581696800068213	0.11853473966114163	-0.4714286261878142	0.20333609864383662
H9	1842	562	29,35,69,84	-0.009011799143571142	0.08619502665871974	0.9167482665709308	-0.3478804681273409	0.32985686984019863
H9	1842	562	29,35,69,85	0.06990075403242019	0.08538545828178558	0.41313885582705456	-0.26578516335908847	0.40558667142392885
H9	1842	562	29,35,69,87	0.13932207162480723	0.08463399347776103	0.09997393441128437	-0.1934095235998762	0.4720536668494907
H9	1842	562	29,35,69,112.1	0.07521723080364215	0.08448365886000955	0.3734630450631278	-0.2569233362168116	0.407357797824096
H9	1842	562	29,35,82,83	1.9253939725030844	0.08959707325321242	1.0267556470339268e-87	1.5731504367087146	2.2776375082974543
H9	1842	562	29,35,82,84	-0.4162305329936261	0.09042762624072684	4.580424951865431e-06	-0.7717393196534997	-0.06072174633375249
H9	1842	562	29,35,82,85	1.090643604379674	0.08820263224929405	2.9370628547448516e-33	0.7438821988808854	1.4374050098784625
H9	1842	562	29,35,82,87	0.9505543946446315	0.08552707752493857	1.8470889953272093e-27	0.6143117128284217	1.2867970764608414
H9	1842	562	29,35,82,112.1	0.5557091182069988	0.08533249925589395	1.0607709304626707e-10	0.22023140487679432	0.8911868315372031
H9	1842	562	29,35,83,84	-0.8029817691071762	0.08827716714393127	3.48018119856098e-19	-1.1500362024234345	-0.4559273357909178
H9	1842	562	29,35,83,85	0.023204517278939588	0.08959731849780826	0.7956871148925597	-0.3290399826744194	0.37544901723229857
H9	1842	562	29,35,83,87	0.37814994665005336	0.08583829267970941	1.1442034911270628e-05	0.040683748009812226	0.7156161452902945
H9	1842	562	29,35,83,112.1	-0.3127103460989368	0.08556920133137187	0.0002681383141667966	-0.6491186342009373	0.023697942003063743
H9	1842	562	29,35,84,85	-0.28580435825207406	0.09030896385404669	0.0015887815305904863	-0.6408466334832552	0.06923791697910714
H9	1842	562	29,35,84,87	-0.23227241464495857	0.08619721605681016	0.007138193650565043	-0.5711496910675278	0.10660486177761058
H9	1842	562	29,35,84,112.1	0.007529954566158473	0.0857592128054283	0.930046631493009	-0.32962534804237603	0.34468525717469295
H9	1842	562	29,35,85,87	0.03234527269126486	0.08536344845976176	0.7048157266187569	-0.30325411489240106	0.3679446602749308
H9	1842	562	29,35,85,112.1	0.08582038918451532	0.08512799537904417	0.31358088101638637	-0.2488533339476874	0.42049411231671807
H9	1842	562	29,35,87,112.1	0.26614482905512915	0.08481018541210049	0.0017391502764836488	-0.06727945029054988	0.5995691084008081
H9	1842	562	29,65,66,69	0.05655068079402837	0.08412453348320004	0.5015612855711337	-0.2741780142988306	0.3872793758868873
H9	1842	562	29,65,66,82	0.11487824413717808	0.08500899805867941	0.1768171002227038	-0.2193276508020559	0.44908413907641204
H9	1842	562	29,65,66,83	-0.021991315371715073	0.08521122100483365	0.7963866230665935	-0.35699223321723095	0.31300960247380083
H9	1842	562	29,65,66,84	-0.014746057220976161	0.08546842182066833	0.863046402599975	-0.35075813895264674	0.3212660245106944
H9	1842	562	29,65,66,85	0.0008174958284788703	0.08499376060793692	0.9923273208635922	-0.33332849432445855	0.33496348598141634
H9	1842	562	29,65,66,87	0.004569316670688009	0.0844311272113485	0.9568489083717127	-0.3273647264869474	0.3365033598283234
H9	1842	562	29,65,66,112.1	0.07900665308569887	0.08422781264399079	0.3484154786709319	-0.25212807554653693	0.4101413817179347
H9	1842	562	29,65,69,82	0.03318949027175984	0.08489033954941097	0.6958852229010477	-0.30054990848250746	0.3669288890260271
H9	1842	562	29,65,69,83	0.07509247651064484	0.08507566362346265	0.3775883279762908	-0.25937550862196646	0.4095604616432561
H9	1842	562	29,65,69,84	-0.0353468635178647	0.08525065695375908	0.678487553476136	-0.37050282055810563	0.2998090935223762
H9	1842	562	29,65,69,85	-0.04952687109444953	0.0848689877181209	0.5596134434336142	-0.38318232687740966	0.2841285846885106
H9	1842	562	29,65,69,87	-0.028144149252099793	0.08416062971313282	0.7381250410714779	-0.3590147537087215	0.3027264552045219
H9	1842	562	29,65,69,112.1	0.05162525104312327	0.08401291848892883	0.5389995863050373	-0.2786646388655681	0.3819151409518146
H9	1842	562	29,65,82,83	0.033103651457661726	0.08878047256506284	0.709306292673502	-0.31592948579039615	0.38213678870571965
H9	1842	562	29,65,82,84	-0.08442182986746252	0.08943321288620283	0.3453656325860558	-0.4360211620851274	0.2671775023502023
H9	1842	562	29,65,82,85	-0.03804609387768157	0.0874868883775382	0.663724533309078	-0.3819936111214607	0.3059014233660975
H9	1842	562	29,65,82,87	0.08188534488099347	0.08506642014898126	0.33592769499144925	-0.25254630029076724	0.4163169900527542
H9	1842	562	29,65,82,112.1	-0.0410222236312293	0.08495526482692609	0.6292716625204232	-0.3750168707823915	0.29297242351993286
H9	1842	562	29,65,83,84	0.0028525817590802915	0.0874769709322201	0.9739910644716596	-0.34105594586285004	0.3467611093810107
H9	1842	562	29,65,83,85	-0.02940189207884744	0.08873317281557641	0.7404330455072761	-0.37824907424604903	0.3194452900883541
H9	1842	562	29,65,83,87	-0.13140963498854896	0.08521588781214057	0.12330155878389003	-0.46642890000375437	0.20360963002665644
H9	1842	562	29,65,83,112.1	0.0036957226252742337	0.08505052045776382	0.9653469974497251	-0.33067341421614577	0.33806485946669423
H9	1842	562	29,65,84,85	-0.018561043005593747	0.08939529690992298	0.8355518015006191	-0.3700113116761697	0.3328892256649822
H9	1842	562	29,65,84,87	0.09902826567777043	0.08550288916832068	0.24700411049605267	-0.23711932160074098	0.4351758529562818
H9	1842	562	29,65,84,112.1	-0.00641120499320838	0.08521920518903187	0.9400419383266122	-0.3414435120032393	0.3286211020168226
H9	1842	562	29,65,85,87	-0.15592203622430173	0.08499771332703476	0.06682274712112571	-0.49008356616777554	0.17823949371917208
H9	1842	562	29,65,85,112.1	0.008394271315295236	0.08481307274489235	0.9211745770814284	-0.32504135934214756	0.34182990197273805
H9	1842	562	29,65,87,112.1	0.04458455817606355	0.08430242389622655	0.5969911510959114	-0.2868434984672703	0.3760126148193974
H9	1842	562	29,66,69,82	-0.06582207870593687	0.08512008272345604	0.4394965400465636	-0.4004646938824812	0.26882053647060744
H9	1842	562	29,66,69,83	-0.041279744102888705	0.08528520604772755	0.6284544846363456	-0.3765715280688993	0.2940120398631219
H9	1842	562	29,66,69,84	0.0294765604347567	0.08565588692879336	0.7308068019162106	-0.3072725249748958	0.36622564584440925
H9	1842	562	29,66,69,85	-0.10143871097417698	0.08507914626107616	0.23336994355709598	-0.43592038781057196	0.23304296586221804
H9	1842	562	29,66,69,87	-0.0044238368542385	0.0843429096194173	0.9581778347212282	-0.33601105979361423	0.3271633860851372
H9	1842	562	29,66,69,112.1	-0.03358216902492833	0.08422267694137768	0.6901581314801298	-0.36469670706408397	0.2975323690142273
H9	1842	562	29,66,82,83	-0.20347612831666667	0.08900224728314746	0.022405854440356258	-0.5533811546567616	0.1464288980234283
H9	1842	562	29,66,82,84	0.025252989769667084	0.08971457300254251	0.7783866367957579	-0.32745248664012905	0.37795846617946327
H9	1842	562	29,66,82,85	-0.07772291053138866	0.08788554254024204	0.3766652154321457	-0.4232377038784071	0.2677918828156298
H9	1842	562	29,66,82,87	0.0872457662944601	0.08535321182645973	0.3068920743480148	-0.24831337680600993	0.4228049093949301
H9	1842	562	29,66,82,112.1	0.1453197610949305	0.08519333447663725	0.0882945477904902	-0.18961083733382078	0.4802503595236818
H9	1842	562	29,66,83,84	-0.1251702223618856	0.08799955776382094	0.15515495063153265	-0.47113325719748833	0.22079281247371715
H9	1842	562	29,66,83,85	0.018868954429141244	0.08891321022030402	0.8319710087130185	-0.33068603001009744	0.3684239388683799
H9	1842	562	29,66,83,87	0.015824409016742813	0.08551201627239502	0.8532153707005865	-0.3203590607219202	0.35200787875540585
H9	1842	562	29,66,83,112.1	-0.087129504801163	0.08529118010704315	0.3071852992770801	-0.4224447752907839	0.2481857656884579
H9	1842	562	29,66,84,85	0.046067052582631385	0.08972400856811982	0.6077387444763751	-0.3066755189783845	0.3988096241436473
H9	1842	562	29,66,84,87	-0.010711965615504263	0.08585519488407385	0.9007269542056213	-0.34824461388419725	0.32682068265318875
H9	1842	562	29,66,84,112.1	-0.015683039842992103	0.08565852261090738	0.8547580374161634	-0.35244248722043403	0.32107640753444977
H9	1842	562	29,66,85,87	-0.03948683387966022	0.08525256010214834	0.6433178465829108	-0.3746502729915072	0.29567660523218675
H9	1842	562	29,66,85,112.1	-0.05753106250674138	0.08503619922708766	0.4988150737748638	-0.3918438966058158	0.276781771592333
H9	1842	562	29,66,87,112.1	0.05950581706864663	0.08464143886862487	0.4821623482491654	-0.2732550490988034	0.3922666832360966
H9	1842	562	29,69,82,83	0.06725547675552562	0.08880737656340441	0.4489984038011706	-0.2818834313526591	0.41639438486371033
H9	1842	562	29,69,82,84	-0.009821139073410909	0.08956546697347506	0.9127016143852862	-0.36194041737449717	0.3422981392276753
H9	1842	562	29,69,82,85	-0.011173400741221168	0.08778694234147737	0.8987398740841781	-0.35630055550383255	0.33395375402139016
H9	1842	562	29,69,82,87	-0.053177893749542876	0.08515988390940778	0.5324448891832287	-0.3879769840201879	0.2816211965211022
H9	1842	562	29,69,82,112.1	0.07500695489341988	0.08493004753562383	0.37731481246318843	-0.2588885525478283	0.4089024623346681
H9	1842	562	29,69,83,84	0.013515194738745698	0.0876196096017141	0.8774381058647376	-0.33095410509883033	0.3579844945763217
H9	1842	562	29,69,83,85	0.031177961373598656	0.08878108003451363	0.7255126133290322	-0.31785756409071964	0.380213486837917
H9	1842	562	29,69,83,87	-0.07742994476824427	0.08529389542743428	0.36415386625011026	-0.4127558903170011	0.25789600078051256
H9	1842	562	29,69,83,112.1	-0.0002196644887999255	0.08504869256370089	0.9979396216986023	-0.334581615114818	0.3341422861372181
H9	1842	562	29,69,84,85	0.06508401867158115	0.08962206036696647	0.46784566711347375	-0.2872577519085741	0.4174257892517364
H9	1842	562	29,69,84,87	0.07272155448766096	0.08555239672669664	0.3954709406193433	-0.26362066769105097	0.40906377666637284
H9	1842	562	29,69,84,112.1	-0.012765338377920904	0.08519134846073688	0.880911986457318	-0.3476881289482512	0.32215745219240943
H9	1842	562	29,69,85,87	-0.1206957577038798	0.0851285537697162	0.15649085460283477	-0.45537167610315465	0.21398016069539505
H9	1842	562	29,69,85,112.1	0.01097260568978823	0.08482435271986816	0.8970956627450593	-0.3225073712629618	0.3444525826425383
H9	1842	562	29,69,87,112.1	0.016097654051419885	0.08420641375244055	0.848423525122254	-0.3149529465959605	0.3471482546988003
H9	1842	562	29,82,83,84	-0.644186701243229	0.0968592457425343	4.3085007081926976e-11	-1.0249808718106563	-0.2633925306758017
H9	1842	562	29,82,83,85	0.30703621990608654	0.09263030595358873	0.0009432926797837592	-0.05713222116111655	0.6712046609732896
H9	1842	562	29,82,83,87	-0.008528382643073651	0.0894031826293955	0.9240180972909051	-0.3600096533721815	0.3429528880860342
H9	1842	562	29,82,83,112.1	0.21730621013815735	0.08827477204208677	0.01395902426515869	-0.1297388070318848	0.5643512273081995
H9	1842	562	29,82,84,85	0.2280965403071602	0.09329005965003663	0.014618258477106839	-0.13866566823873538	0.5948587488530558
H9	1842	562	29,82,84,87	0.47203411407686985	0.09021705831740817	1.9553432953193702e-07	0.1173531579157116	0.8267150702380281
H9	1842	562	29,82,84,112.1	-0.06574500816077378	0.08884829597289087	0.4594543392422593	-0.41504478756705765	0.2835547712455101
H9	1842	562	29,82,85,87	-0.6537698799089493	0.08813663413470955	2.1624704533175333e-13	-1.000271819240006	-0.3072679405778927
H9	1842	562	29,82,85,112.1	-0.06380458999156446	0.08732078144676157	0.4651010695756682	-0.407099071477676	0.27948989149454706
H9	1842	562	29,82,87,112.1	-0.11170832588105556	0.08521976604906206	0.19015152106435254	-0.4467428378662375	0.22332618610412636
H9	1842	562	29,83,84,85	-0.050711428571468486	0.09710760382923841	0.6016082710348103	-0.4324819985616375	0.3310591414187005
H9	1842	562	29,83,84,87	-0.04199836775003144	0.08817935176406122	0.6339537251769928	-0.3886682479329177	0.3046715124328548
H9	1842	562	29,83,84,112.1	0.029613709469435007	0.087300583153371	0.7345030497895289	-0.3136013640848928	0.3728287830237629
H9	1842	562	29,83,85,87	-0.1964579217055729	0.08933986771944101	0.028056641126539338	-0.5476902750656073	0.15477443165446148
H9	1842	562	29,83,85,112.1	0.0865627005345351	0.08817880393461551	0.3264467613415275	-0.260105025901873	0.43323042697094316
H9	1842	562	29,83,87,112.1	-0.17909041519633728	0.08532343128477021	0.03601596159128586	-0.5145324785427294	0.1563516481500548
H9	1842	562	29,84,85,87	0.22068666113604335	0.09013929905643472	0.014487293388653137	-0.13368859087617874	0.5750619131482655
H9	1842	562	29,84,85,112.1	-0.11150616995594578	0.0888594592543552	0.20975869827256358	-0.4608498368865793	0.23783749697468778
H9	1842	562	29,84,87,112.1	0.11929621014843944	0.08566140339431902	0.16396801221547277	-0.21747456279241573	0.4560669830892946
H9	1842	562	29,85,87,112.1	-0.23313462856433315	0.08506287374555513	0.006215501303100097	-0.5675523313422542	0.10128307421358795
H9	1842	562	35,65,66,69	-0.020575347360167584	0.08427131944121082	0.8071491399016054	-0.3518811193929011	0.31073042467256595
H9	1842	562	35,65,66,82	-0.0002975726162025849	0.08512743740152284	0.9972114543633176	-0.33496910210560127	0.33437395687319604
H9	1842	562	35,65,66,83	-0.015794978731622167	0.08539173124037518	0.8532812241122053	-0.3515055577446912	0.3199156002814469
H9	1842	562	35,65,66,84	-0.040815128710282596	0.08558553940328562	0.6335198541900314	-0.37728764860033154	0.29565739117976636
H9	1842	562	35,65,66,85	-0.03989026795069562	0.08509711656393695	0.6393198100166944	-0.37444259355706877	0.29466205765567755
H9	1842	562	35,65,66,87	0.012668272884029656	0.08441001898903101	0.8807249825138819	-0.31918278503096914	0.34451933079902847
H9	1842	562	35,65,66,112.1	-0.07519078629144618	0.08419926499501929	0.37201967111214107	-0.40621328218608	0.2558317096031876
H9	1842	562	35,65,69,82	0.12922129759993944	0.08512633126671676	0.12926273516153977	-0.20544588321130475	0.46388847841118364
H9	1842	562	35,65,69,83	-0.03933515609378309	0.08536990747879948	0.6450480866731318	-0.3749599367803819	0.29628962459281577
H9	1842	562	35,65,69,84	0.014801899314017541	0.08561485453421658	0.8627657112103972	-0.32178587060593156	0.35138966923396664
H9	1842	562	35,65,69,85	0.11780268161224616	0.08503695215431	0.16619854430141587	-0.21651311255837258	0.4521184757828649
H9	1842	562	35,65,69,87	0.05255253856301392	0.08433881531412363	0.5333218454929978	-0.2790185879513235	0.3841236650773514
H9	1842	562	35,65,69,112.1	0.00038651564443503705	0.08417722727851476	0.9963370906434308	-0.33054934077749576	0.33132237206636583
H9	1842	562	35,65,82,83	0.15244140735954959	0.08888025092102672	0.08656296346690188	-0.19698400030119395	0.5018668150202932
H9	1842	562	35,65,82,84	0.016179473548394066	0.08964561535185943	0.8568022849068866	-0.3362549015205354	0.3686138486173235
H9	1842	562	35,65,82,85	0.12010853366599147	0.08773272540726691	0.17123078680916412	-0.22480547167205941	0.46502253900404233
H9	1842	562	35,65,82,87	-0.0007386019256306192	0.08526102881605199	0.9930894968547419	-0.33593533509074014	0.3344581312394789
H9	1842	562	35,65,82,112.1	0.09475035536508164	0.08494335473059711	0.2648655410167258	-0.23919746822041876	0.42869817895058204
H9	1842	562	35,65,83,84	-0.04358666650178758	0.08762217382452205	0.6189651073935899	-0.38806604737075945	0.30089271436718423
H9	1842	562	35,65,83,85	0.04049344967180263	0.08882427558353502	0.6485516679724286	-0.30871189554628015	0.3896987948898854
H9	1842	562	35,65,83,87	0.026588117544539498	0.08530810203525754	0.7553408262195873	-0.30879368011622965	0.36196991520530863
H9	1842	562	35,65,83,112.1	0.0913184613056689	0.08510975495620189	0.28349605294444924	-0.24328355110203065	0.42592047371336844
H9	1842	562	35,65,84,85	0.002411678164230824	0.08954749879566645	0.9785183027988809	-0.34963695972134545	0.3544603160498071
H9	1842	562	35,65,84,87	0.00341956300705315	0.08554516698230741	0.9681202701738769	-0.3328942360252982	0.3397333620394045
H9	1842	562	35,65,84,112.1	-0.023832352553325886	0.08527679849388826	0.7799288970994235	-0.35909108291184466	0.3114263778051929
H9	1842	562	35,65,85,87	0.04489976889111563	0.08517966633271416	0.5982027162318406	-0.2899770943522283	0.37977663213445956
H9	1842	562	35,65,85,112.1	0.10078055732792088	0.084810418263071	0.23493410067127962	-0.232644637452227	0.4342057521080688
H9	1842	562	35,65,87,112.1	0.02445979160209963	0.08428712757791958	0.7717132619196422	-0.3069081288219422	0.3558277120261414
H9	1842	562	35,66,69,82	0.10771100919652837	0.085303318689654	0.206933280767333	-0.2276519831338082	0.44307400152686494
H9	1842	562	35,66,69,83	0.011197268507738473	0.08563357831530947	0.8959873596186164	-0.32546411241998274	0.34785864943545974
H9	1842	562	35,66,69,84	-0.039463148367769776	0.08584515124623202	0.6458085298364595	-0.3769563108990699	0.29803001416353037
H9	1842	562	35,66,69,85	0.022552578868911904	0.08523242528021299	0.7913595040987722	-0.3125317018439654	0.35763685958178915
H9	1842	562	35,66,69,87	-0.04956186033300271	0.08443888540767396	0.5573371642849505	-0.3815264042023895	0.2824026835363841
H9	1842	562	35,66,69,112.1	-0.020875902432706706	0.0843726301352618	0.8046189686222307	-0.35257996913948	0.31082816427406657
H9	1842	562	35,66,82,83	-0.2788252862301758	0.08939136251894961	0.0018542076742880495	-0.6302600871657316	0.07260951470538002
H9	1842	562	35,66,82,84	0.09008777341369456	0.09012708972818669	0.31771058486856274	-0.2642394786271489	0.44441502545453804
H9	1842	562	35,66,82,85	0.08553607732568796	0.08795627459738561	0.3309935119212264	-0.2602567932954826	0.43132894794685855
H9	1842	562	35,66,82,87	0.03140865228694556	0.0853793460216711	0.7130296618992955	-0.30425323525586107	0.3670705398297522
H9	1842	562	35,66,82,112.1	-0.0032041965514118254	0.08532000687822328	0.970048308883658	-0.33863279712467653	0.3322244040218528
H9	1842	562	35,66,83,84	-0.06380243332641428	0.08789757664335562	0.4680496355408754	-0.4093645377615847	0.28175967110875616
H9	1842	562	35,66,83,85	-0.15328621181293106	0.08928789948560337	0.08626430618183452	-0.5043142563292577	0.19774183270339557
H9	1842	562	35,66,83,87	0.25083812910215486	0.08560522665990228	0.0034478162421111166	-0.08571178962056741	0.5873880478248772
H9	1842	562	35,66,83,112.1	-0.25514646518950707	0.08540570301691389	0.0028665844272901526	-0.5909119730946775	0.08061904271566339
H9	1842	562	35,66,84,85	0.36032234032740834	0.09001007023212339	6.609838415509755e-05	0.0064551408257111365	0.7141895398291056
H9	1842	562	35,66,84,87	-0.09417832550741137	0.08591030975979423	0.2731799249723821	-0.4319276533839722	0.2435710023691495
H9	1842	562	35,66,84,112.1	0.09904807932730536	0.08556859985295795	0.24727251775828918	-0.23735784411170419	0.4354540027663149
H9	1842	562	35,66,85,87	0.009521023163957455	0.0852758143949527	0.9111186304570036	-0.3257338382904102	0.34477588461832515
H9	1842	562	35,66,85,112.1	-0.04303848111454245	0.08512834144161045	0.6132443919095383	-0.37771356476330586	0.29163660253422097
H9	1842	562	35,66,87,112.1	-0.028197628263436997	0.08459062582975495	0.7389305558211874	-0.3607587271413304	0.30436347061445646
H9	1842	562	35,69,82,83	0.06130913182103953	0.08949966015939895	0.4934547996566434	-0.29055143239455394	0.413169696036633
H9	1842	562	35,69,82,84	-0.10424854603857071	0.09029226653043011	0.248482951686733	-0.45922517711313554	0.25072808503599414
H9	1842	562	35,69,82,85	-0.033116856201789724	0.08826248898768632	0.7075674021527951	-0.3801135835521395	0.31387987114856003
H9	1842	562	35,69,82,87	0.11448492677375831	0.085397252036781	0.18028301943816688	-0.22124735679701313	0.4502172103445298
H9	1842	562	35,69,82,112.1	0.08138560530185485	0.08514670473413259	0.33933961653864897	-0.25336167212346805	0.41613288272717774
H9	1842	562	35,69,83,84	0.12921742043428588	0.0880413616654375	0.14243413400905167	-0.2169099630075911	0.47534480387616285
H9	1842	562	35,69,83,85	0.04859132711706893	0.08943419490785157	0.5870045585140702	-0.30301186583806444	0.4001945200722023
H9	1842	562	35,69,83,87	-0.056489879084518954	0.0857648591844496	0.5102326049497725	-0.3936673799684957	0.2806876217994578
H9	1842	562	35,69,83,112.1	0.06869123482556982	0.08548511401809432	0.42180832238409405	-0.26738647090951984	0.4047689405606595
H9	1842	562	35,69,84,85	-0.005247392668654982	0.09019330849312503	0.9536148093989139	-0.3598349783459767	0.34934019300866676
H9	1842	562	35,69,84,87	0.048371587341312056	0.08593882314560648	0.5736283035576302	-0.28948983857005395	0.386233013252678
H9	1842	562	35,69,84,112.1	-0.06618793450242497	0.08563680293939764	0.4397294459955525	-0.40286199277494306	0.2704861237700932
H9	1842	562	35,69,85,87	0.008926124494895937	0.08533476506790955	0.916708597333121	-0.3265604966891796	0.34441274567897145
H9	1842	562	35,69,85,112.1	0.08772416465975905	0.08502738162748948	0.3023997763147379	-0.2465540037705953	0.42200233309011337
H9	1842	562	35,69,87,112.1	0.045026961552889724	0.08437862961981943	0.5936902515900527	-0.2867006916347449	0.3767546147405243
H9	1842	562	35,82,83,84	-0.007645548930863333	0.09817094653038785	0.9379357163102187	-0.39359656342902954	0.3783054655673029
H9	1842	562	35,82,83,85	-0.17728565788717532	0.09315811303042762	0.057256636532137015	-0.5435291291335183	0.18895781335916761
H9	1842	562	35,82,83,87	-0.008753183174101564	0.08999731336507347	0.9225347547271209	-0.36257023010058437	0.34506386375238124
H9	1842	562	35,82,83,112.1	0.1339610082142388	0.08851648837180516	0.130424503865871	-0.21403429685637596	0.48195631328485355
H9	1842	562	35,82,84,85	-0.02671497498995956	0.09409399824118747	0.7765191789436723	-0.39663780208762645	0.3432078521077073
H9	1842	562	35,82,84,87	0.07167245273588108	0.09081891730803368	0.43015309189808026	-0.2853746626223351	0.4287195680940972
H9	1842	562	35,82,84,112.1	-0.055733467888535254	0.08924289820106628	0.53240116556116	-0.40658459355020427	0.2951176577731338
H9	1842	562	35,82,85,87	-0.001153829341121057	0.0884402385135048	0.9895927836698779	-0.34884936435545694	0.3465417056732148
H9	1842	562	35,82,85,112.1	0.27808156340187273	0.08755518175648294	0.0015284736368791289	-0.06613444365298377	0.6222975704567293
H9	1842	562	35,82,87,112.1	0.22593785568712382	0.0852871882013655	0.008168971729606579	-0.10936172095314017	0.5612374323273879
H9	1842	562	35,83,84,85	0.09596301300387156	0.09795362739840123	0.3274302172939786	-0.2891336291731096	0.4810596551808527
H9	1842	562	35,83,84,87	-0.13490765641573776	0.0883676732568317	0.1270918824965382	-0.4823179070825133	0.2125025942510378
H9	1842	562	35,83,84,112.1	-0.01852068376947491	0.08750028539089154	0.8324026632963564	-0.3625208702710916	0.32547950273214177
H9	1842	562	35,83,85,87	0.20263729645721593	0.09003159976423161	0.024571462945556826	-0.15131454463196228	0.5565891375463942
H9	1842	562	35,83,85,112.1	-0.08900051781568619	0.08844399475740501	0.31446513385537667	-0.43671082019445345	0.2587097845630811
H9	1842	562	35,83,87,112.1	-0.10172782707310282	0.08542621755740587	0.23394237915067906	-0.437573986209566	0.23411833206336033
H9	1842	562	35,84,85,87	0.7097531245148425	0.09064460230875095	1.0166638647812995e-14	0.3533913142615801	1.066114934768105
H9	1842	562	35,84,85,112.1	-0.13151177091439098	0.08900582007124992	0.13977058924688326	-0.48143084337751385	0.2184073015487319
H9	1842	562	35,84,87,112.1	0.06691595817155058	0.08571078019741363	0.43511266393708503	-0.2700489356158541	0.4038808519589552
H9	1842	562	35,85,87,112.1	0.1344587624134428	0.08515615695226	0.11459070040579562	-0.20032567563123305	0.4692432004581186
H9	1842	562	65,66,69,82	-0.012811122283166831	0.08455837977328014	0.879600262109413	-0.3452454484380717	0.31962320387173804
H9	1842	562	65,66,69,83	-0.11278543947596281	0.08490666431929945	0.18430056972277958	-0.44658901772245857	0.22101813877053295
H9	1842	562	65,66,69,84	-0.018044822500004873	0.08513663212513717	0.8321787474507266	-0.3527525002902237	0.31666285529021393
H9	1842	562	65,66,69,85	0.018199168225760537	0.08459531879765259	0.8296986021627434	-0.3143803806700365	0.3507787171215576
H9	1842	562	65,66,69,87	-0.010303312498105004	0.08410672237470838	0.902520025776549	-0.3409619846805751	0.32035535968436507
H9	1842	562	65,66,69,112.1	0.02595510429837658	0.08401276486294333	0.7574156277954569	-0.3043341816423685	0.3562443902391217
H9	1842	562	65,66,82,83	0.010207057730173878	0.08812250089828366	0.9078069851910449	-0.336239317942494	0.3566534334028418
H9	1842	562	65,66,82,84	-0.019058024011037733	0.08867316541802547	0.8298605228982429	-0.36766929202256793	0.32955324400049246
H9	1842	562	65,66,82,85	0.04557097654222647	0.08706735098193055	0.6007871202259362	-0.2967271638830805	0.38786911696753346
H9	1842	562	65,66,82,87	-0.01681978444237106	0.0849053385098039	0.8429979412589194	-0.3506181503777104	0.3169785814929682
H9	1842	562	65,66,82,112.1	0.07073660573662233	0.08465750817380842	0.4035572321407984	-0.26208743558454745	0.4035606470577921
H9	1842	562	65,66,83,84	0.005349532913678845	0.08724333369854084	0.9511160196348214	-0.33764046911030243	0.3483395349376601
H9	1842	562	65,66,83,85	0.015282598816742626	0.0882863080706313	0.8625980662929881	-0.3318077713021851	0.3623729689356704
H9	1842	562	65,66,83,87	0.04783689193979038	0.08518081786598039	0.5744921350013824	-0.28704449846202595	0.38271828234160665
H9	1842	562	65,66,83,112.1	-0.004193258516654572	0.08496723691809555	0.9606468972661	-0.33823497296110283	0.32984845592779366
H9	1842	562	65,66,84,85	-0.04271961465002522	0.08880222726649897	0.6305527527784105	-0.3918382787202858	0.3063990494202354
H9	1842	562	65,66,84,87	-0.039850777973967265	0.08546914642806026	0.6411092975344812	-0.37586570844009454	0.29616415249216005
H9	1842	562	65,66,84,112.1	-0.028692858649986608	0.08515469448247256	0.7362099691239161	-0.36347154711479096	0.30608582981481774
H9	1842	562	65,66,85,87	0.0018588098335429667	0.08494197428110328	0.9825444651519986	-0.3320835866281348	0.33580120629522076
H9	1842	562	65,66,85,112.1	0.0016491230969397641	0.08470303204068172	0.984469626591431	-0.33135389156842804	0.33465213776230757
H9	1842	562	65,66,87,112.1	0.02648130071812363	0.08419584717515856	0.7531771803132821	-0.3045277582983986	0.35749035973464593
H9	1842	562	65,69,82,83	0.015466465750735348	0.08840048510576112	0.8611394730566606	-0.33207278200560125	0.36300571350707195
H9	1842	562	65,69,82,84	-0.02857724387069259	0.08900580572856544	0.7482084830315561	-0.37849625994672925	0.32134177220534405
H9	1842	562	65,69,82,85	-0.0620036407592522	0.08731702963818137	0.4777727626219883	-0.4052833723180287	0.2812760907995243
H9	1842	562	65,69,82,87	0.008958443628409904	0.08485549768157376	0.9159377438245513	-0.3246439771836653	0.3425608644404851
H9	1842	562	65,69,82,112.1	0.019224753971583075	0.08460591418599787	0.8202834653994758	-0.3133964498234015	0.35184595776656763
H9	1842	562	65,69,83,84	0.04454474733612587	0.08735153017658442	0.610175733308447	-0.29887062025620226	0.38796011492845406
H9	1842	562	65,69,83,85	0.07339295630123967	0.08853953650177107	0.4072993407455632	-0.2746929605996265	0.4214788732021058
H9	1842	562	65,69,83,87	0.009499783461194636	0.08501792723693251	0.9110481980977622	-0.3247412158090784	0.34374078273146763
H9	1842	562	65,69,83,112.1	0.01197657857978146	0.08491529965156956	0.8878593750876175	-0.3218609487664018	0.34581410592596473
H9	1842	562	65,69,84,85	-0.02413823590894229	0.08904727528289418	0.7863792516206562	-0.3742202861323477	0.32594381431446307
H9	1842	562	65,69,84,87	-0.03263046077387538	0.0852103239926145	0.7018276667496866	-0.3676278520895142	0.30236693054176345
H9	1842	562	65,69,84,112.1	0.016350961489813867	0.0850271590891916	0.8475355223064072	-0.3179263320494972	0.3506282550291249
H9	1842	562	65,69,85,87	0.05621776184790073	0.08490978272717867	0.508033903031454	-0.2775980761630889	0.39003359985889036
H9	1842	562	65,69,85,112.1	0.002942200589981181	0.08463006781155441	0.9722722083181432	-0.32977396120038616	0.3356583623803485
H9	1842	562	65,69,87,112.1	0.067596504522976	0.08407107737239106	0.42152320240836294	-0.2629220322600467	0.3981150413059987
H9	1842	562	65,82,83,84	0.050436254837916306	0.09673468973361461	0.6021870752214686	-0.32986823400896736	0.4307407436848
H9	1842	562	65,82,83,85	-0.10208318838997188	0.09266831617579335	0.27084377912057106	-0.46640106352437766	0.2622346867444339
H9	1842	562	65,82,83,87	0.15528652975677762	0.08891421051998519	0.08096815309502647	-0.19427238727851306	0.5048454467920683
H9	1842	562	65,82,83,112.1	-0.06524199723894872	0.0879774770722881	0.45848022493688867	-0.4111182236490538	0.2806342291711563
H9	1842	562	65,82,84,85	0.12895644254328226	0.09315959028293327	0.16652228124295027	-0.2372928363999749	0.4952057214865394
H9	1842	562	65,82,84,87	-0.0803029140697138	0.08960626493755973	0.3703276944655952	-0.4325825862162751	0.2719767580768475
H9	1842	562	65,82,84,112.1	0.15477683726094438	0.08846060500546861	0.08041496061224387	-0.19299876694405343	0.5025524414659421
H9	1842	562	65,82,85,87	-0.041589093368645365	0.08755712483116876	0.6348724111789206	-0.38581273946206407	0.30263455272477335
H9	1842	562	65,82,85,112.1	-0.10283273315145813	0.08689336381012354	0.23685614521708903	-0.44444685729861094	0.23878139099569468
H9	1842	562	65,82,87,112.1	-0.02037248793622845	0.08477692571368545	0.810130755592678	-0.35366600950887106	0.3129210336364142
H9	1842	562	65,83,84,85	-0.07493120438241324	0.09683613252213967	0.43919559249198603	-0.45563450722191384	0.30577209845708736
H9	1842	562	65,83,84,87	-0.02928389001639114	0.08753786958583627	0.7380357853951405	-0.37343183569402355	0.31486405566124126
H9	1842	562	65,83,84,112.1	0.17055733160246023	0.08714708648283524	0.05055042081085835	-0.172054282396784	0.5131689456017045
H9	1842	562	65,83,85,87	-0.029040353443510074	0.0890070742648858	0.7442732893992556	-0.3789643566659182	0.32088364977889805
H9	1842	562	65,83,85,112.1	-0.07876020398340536	0.08807451702281566	0.371358885248642	-0.42501793499010077	0.26749752702329
H9	1842	562	65,83,87,112.1	0.01735396994054572	0.08503754125768377	0.8383279402962219	-0.3169641402416099	0.35167208012270135
H9	1842	562	65,84,85,87	0.010947189286322975	0.08961641268079079	0.9027945873872851	-0.3413723778794198	0.3632667564520658
H9	1842	562	65,84,85,112.1	0.06985124255914485	0.08845548289810515	0.4298628006534675	-0.2779042245013803	0.41760670961967006
H9	1842	562	65,84,87,112.1	0.004600427701834345	0.08529242682966275	0.9569936804650989	-0.3307197441753848	0.33992059957905346
H9	1842	562	65,85,87,112.1	0.0021500854906438688	0.08482067940825769	0.9797808601463225	-0.33131545013916147	0.33561562112044924
H9	1842	562	66,69,82,83	-0.07417273333339003	0.08819289849176998	0.40048910091422807	-0.4208958713638076	0.27255040469702757
H9	1842	562	66,69,82,84	0.13553031272599297	0.08878483337694165	0.1271316950405882	-0.2135199686958571	0.48458059414784305
H9	1842	562	66,69,82,85	0.020205545210973452	0.08747014931859233	0.8173522455675981	-0.3236761637971694	0.3640872542191163
H9	1842	562	66,69,82,87	0.02152663970984993	0.08492221496111212	0.7999329569745861	-0.3123380746079155	0.35539135402761535
H9	1842	562	66,69,82,112.1	-0.06602265128852963	0.08467785795082482	0.435716307251364	-0.39892669608691816	0.2668813935098589
H9	1842	562	66,69,83,84	-0.05040311095188238	0.08753720142906313	0.564857839486743	-0.3945484298260301	0.29374220792226535
H9	1842	562	66,69,83,85	-0.03834584113323408	0.08828474483791696	0.6641127509676921	-0.38543006553111786	0.3087383832646497
H9	1842	562	66,69,83,87	-0.15321865999277173	0.08515781432710931	0.07221745616414534	-0.4880096138705642	0.18157229388502072
H9	1842	562	66,69,83,112.1	0.0035069951434576196	0.08500238753843059	0.9670969628608502	-0.33067291107827324	0.3376869013651884
H9	1842	562	66,69,84,85	0.10280706072263772	0.08879752973736223	0.24717414948668415	-0.2462931353975823	0.45190725684285776
H9	1842	562	66,69,84,87	0.07467763638195829	0.08536567855493488	0.38184849990174763	-0.2609305186377456	0.41028579140166216
H9	1842	562	66,69,84,112.1	-0.050572969932480394	0.08524336004405825	0.5531002467977301	-0.38570023977145385	0.28455429990649306
H9	1842	562	66,69,85,87	0.042415412797780425	0.08499881928213372	0.6178568273309396	-0.29175046511734404	0.3765812907129049
H9	1842	562	66,69,85,112.1	0.03035530287013316	0.08466496907364907	0.7200025615838153	-0.30249807036607196	0.3632086761063383
H9	1842	562	66,69,87,112.1	-0.0031685205660166305	0.08418282198385502	0.9699817288053041	-0.33412637211255614	0.3277893309805229
H9	1842	562	66,82,83,84	0.13812692177065927	0.09636941056820804	0.15201441212521602	-0.2407415020341086	0.5169953455754271
H9	1842	562	66,82,83,85	0.07124793798479159	0.09215950152631047	0.4396096155543072	-0.2910695741389687	0.43356545010855185
H9	1842	562	66,82,83,87	-0.1345795152321238	0.08916717568704173	0.13147036620235245	-0.4851329440482289	0.21597391358398127
H9	1842	562	66,82,83,112.1	0.11597229226375078	0.08808416750989154	0.18820584667871076	-0.23032337884038662	0.46226796336788817
H9	1842	562	66,82,84,85	-0.14334840896953588	0.09297399481593482	0.12336648761290384	-0.5088680345753656	0.22217121663629374
H9	1842	562	66,82,84,87	-0.0158910418049084	0.08979406885971866	0.8595583297721	-0.3689090496490026	0.3371269660391858
H9	1842	562	66,82,84,112.1	-0.02724373972336684	0.08854535603122178	0.7583749962197192	-0.37535253562636944	0.32086505617963573
H9	1842	562	66,82,85,87	-0.1984268726058189	0.08772634327312195	0.02387167723870812	-0.543315787107579	0.14646204189594117
H9	1842	562	66,82,85,112.1	0.014649788107357467	0.08693793192729529	0.866209810578183	-0.3271395519325278	0.3564391281472427
H9	1842	562	66,82,87,112.1	0.05566764632745518	0.08494171015209522	0.5123518890483232	-0.27827371173271764	0.389609004387628
H9	1842	562	66,83,84,85	0.0049356756405044555	0.09646889519340139	0.9592033074939399	-0.3743238637985459	0.3841952150795548
H9	1842	562	66,83,84,87	0.19865893979435342	0.0878364703004931	0.023883694932013706	-0.14666293007189837	0.5439808096606052
H9	1842	562	66,83,84,112.1	-0.03593564713966255	0.08717741805496591	0.6802524840336313	-0.3786665072239135	0.30679521294458845
H9	1842	562	66,83,85,87	0.05482588150044722	0.08923804830910917	0.5390748446541209	-0.296006177209265	0.4056579402101594
H9	1842	562	66,83,85,112.1	0.04773763482480434	0.08806489330428484	0.5878623039113265	-0.29848226132278566	0.3939575309723944
H9	1842	562	66,83,87,112.1	0.07952491575605185	0.08523834104821716	0.35101079736768037	-0.25558262231293166	0.4146324538250354
H9	1842	562	66,84,85,87	-0.12294346433823472	0.08985919749410513	0.17149617710042392	-0.47621752006006385	0.2303305913835944
H9	1842	562	66,84,85,112.1	-0.03742067495933685	0.08858680010658032	0.672790754866817	-0.38569240484122913	0.3108510549225555
H9	1842	562	66,84,87,112.1	-0.005823664204057069	0.08551104925188578	0.9457132993996198	-0.34200333218099965	0.33035600377288554
H9	1842	562	66,85,87,112.1	-0.07650650129923217	0.0849318161033913	0.36786460995085235	-0.41040896171942365	0.25739595912095925
H9	1842	562	69,82,83,84	0.13661162981456187	0.09669845085967192	0.15796962532244122	-0.24355038887534797	0.5167736485044717
H9	1842	562	69,82,83,85	-0.07337939259902515	0.09253285936770865	0.4279195268919276	-0.43716473041614234	0.29040594521809204
H9	1842	562	69,82,83,87	0.12928495345059357	0.08890487539598518	0.14613762595233384	-0.22023726331129032	0.47880717021247743
H9	1842	562	69,82,83,112.1	-0.00810679459087088	0.08799118780549024	0.9266076669123462	-0.35403692362263645	0.3378233344408947
H9	1842	562	69,82,84,85	0.05641370479229846	0.09335282212917563	0.5457470672102107	-0.31059524928628507	0.423422658870882
H9	1842	562	69,82,84,87	-0.04081101543829277	0.08960695837178617	0.6488665795425979	-0.39309341376457063	0.31147138288798504
H9	1842	562	69,82,84,112.1	0.022082952456119798	0.08854957776837398	0.8031028595648788	-0.3260424408598081	0.3702083457720477
H9	1842	562	69,82,85,87	-0.017016100624381678	0.0875839421708823	0.8459848603589624	-0.3613451768866476	0.3273129756378842
H9	1842	562	69,82,85,112.1	-0.007117620746941139	0.08709691177228009	0.934881591985498	-0.3495319769919788	0.3352967354980966
H9	1842	562	69,82,87,112.1	0.07187367137156478	0.08483805276237172	0.39704942740620675	-0.26166016617324217	0.4054075089163718
H9	1842	562	69,83,84,85	0.1254986591308236	0.09683616087333353	0.1952126937718403	-0.25520475516906754	0.5062020734307147
H9	1842	562	69,83,84,87	-0.08736386481777013	0.0876323841987244	0.3189840750610811	-0.4318833869344439	0.2571556572989036
H9	1842	562	69,83,84,112.1	0.07122615581934535	0.08719512466125419	0.41416079486873614	-0.27157431633346363	0.4140266279721544
H9	1842	562	69,83,85,87	-0.04015159155698983	0.08903433722482307	0.6520893644032402	-0.3901827768675604	0.30987959375358076
H9	1842	562	69,83,85,112.1	-0.09106022335054076	0.08803833427394232	0.30117976821170694	-0.4371757048513635	0.25505525815028196
H9	1842	562	69,83,87,112.1	0.011916977754021285	0.08501422218613944	0.8885427634110127	-0.32230945541331707	0.34614341092135964
H9	1842	562	69,84,85,87	0.08118569002405898	0.08973452075581631	0.3657776494658789	-0.2715982093396261	0.433969589387744
H9	1842	562	69,84,85,112.1	-0.008380040709215386	0.08856556866478915	0.9246317722709911	-0.3565683009212291	0.3398082195027983
H9	1842	562	69,84,87,112.1	-0.04474524994637275	0.08526854699024583	0.599843134311524	-0.37997154019593377	0.2904810403031883
H9	1842	562	69,85,87,112.1	0.04239662485293888	0.08486855713150432	0.6174733697762114	-0.29125713811409787	0.37605038781997563
H9	1842	562	82,83,84,85	0.3385335203136112	0.09875177718534565	0.0006270667576985091	-0.0497009822067796	0.7267680228340021
H9	1842	562	82,83,84,87	0.3028686737783498	0.09780831858214836	0.0020003904345593884	-0.08165669872027531	0.687394046276975
H9	1842	562	82,83,84,112.1	-0.11656021341365866	0.09428330150052854	0.21658267397759096	-0.4872272707298646	0.25410684390254723
H9	1842	562	82,83,85,87	0.5113101140036205	0.09347517440241519	5.4069213712137767e-08	0.14382014201034926	0.8788000859968916
H9	1842	562	82,83,85,112.1	0.2022699468977983	0.09108195523371945	0.02654263815948022	-0.15581128046460938	0.560351174260206
H9	1842	562	82,83,87,112.1	0.46772660437407193	0.08830639636627736	1.3872875356654138e-07	0.12055725877046003	0.8148959499776838
H9	1842	562	82,84,85,87	-0.5259450594053692	0.0943134186064953	2.9894476877822326e-08	-0.8967305196504705	-0.15515959916026795
H9	1842	562	82,84,85,112.1	0.04324938848102977	0.09169449267236005	0.637243930774182	-0.3172399795198943	0.40373875648195384
H9	1842	562	82,84,87,112.1	-0.1529055606886235	0.08899155771092043	0.08600142779695723	-0.5027685618533342	0.19695744047608726
H9	1842	562	82,85,87,112.1	0.24382124782940157	0.08720619377953821	0.0052526479329286545	-0.09902274165294644	0.5866652373117496
H9	1842	562	83,84,85,87	-0.3095424521467678	0.09813130570926738	0.001645879670666259	-0.6953376220119982	0.07625271771846265
H9	1842	562	83,84,85,112.1	-0.027277501698622864	0.09435347367575891	0.7725523783616346	-0.3982204351592166	0.3436654317619709
H9	1842	562	83,84,87,112.1	-0.18057313482054238	0.08727017538518704	0.03873443855494551	-0.5236686627313372	0.1625223930902524
H9	1842	562	83,85,87,112.1	-0.060624686584811266	0.08842933348829056	0.4931071027461392	-0.4082773493880367	0.28702797621841414
H9	1842	562	84,85,87,112.1	0.01783103809958491	0.08905859731100717	0.8413427391863082	-0.33229552374758314	0.367957599946753
