# Supplementary material for: Binding affinity landscapes constrain the evolution of broadly neutralizing anti-influenza antibodies
Source: eLife. 2021 Sep 7;10:e71393. doi: 10.7554/eLife.71393 (PMC8476123; doi:10.7554/eLife.71393)
Supplement: Figure 2—source data 3. — For each mutated position, the contact surface area with HA (as plotted in Figure 2C and Figure 2—figure supplement 1) and the number of HA residues within six angstroms is tabulated for CR9114-H5 (4FQI), CR9114-H3 (4FQY), and CR6261-H1 (3GBN). Distances between alpha-carbons plotted in Figure 2F and Figure 2—figure supplement 1 are also tabulated here alongside the corresponding second order effects. [file elife-71393-fig2-data3.xlsx]

## Sheet: CR9114_HA_buriedSA_contacts
CR9114 mutation site (IMGT)	CR9114 mutation site (Kabat)	contact SA with H5 in 4FQI	H5 contacts in 4FQI	contact SA with H3 in 4FQY	H3 contacts in 4FQY
30	29	0	0	6.9472	2
35	30	42.958	3	86.182	5
36	31	112.79	4	103.19	7
57	52	9.842	1	16.122	1
64	56	13.484	2	0	0
65	57	0	0	0	0
66	58	0	0	0	0
79	70	0	0	0	0
82	73	65.524	3	93.334	6
83	74	134.24	8	144.64	10
84	75	28.442	1	17.222	2
85	76	0	1	16.617	1
92	82A	0	0	0	0
95	83	0	0	0	0
103	91	0	0	0	0
113	100B	0	0	8.5163	1

## Sheet: CR6261_HA_buriedSA_contacts
CR6261 mutation site (IMGT)	CR6261 mutation site (Kabat)	contact SA with H1 in 3GBN	H1 contacts in 3GBN
29	28	66.883	2
35	30	50.217	3
65	57	0	0
66	58	1.8453	0
69	61	0	0
82	73	4.9606	0
83	74	150.62	8
84	75	37.166	1
85	76	0.42356	0
87	78	0	0
112.1	100	0	0

## Sheet: CR9114_H1_pairwise
sites	distance	second order effect
30,57	8.79415	0.780117
30,83	10.8917	0.696605
57,65	6.46431	0.648751
30,82	8.62226	0.4782
57,66	8.82959	0.301894
30,85	6.68442	0.277175
30,84	10.4248	0.241646
57,82	10.0124	0.239508
65,83	17.2778	0.201196
66113	14.4612	0
66,95	22.7599	0
66103	15.9982	0
30,35	3.79622	0
79,82	9.74508	0
79,83	12.5228	0
66,85	18.5256	0
79,84	12.2725	0
79,85	11.2868	0
79,92	14.0636	0
66,92	16.7351	0
66,82	16.9785	0
66,84	20.8684	0
66,83	20.6357	0
79103	14.6935	0
66,79	10.16	0
65113	15.609	0
65103	16.7318	0
65,95	24.3349	0
65,92	17.2763	0
65,85	15.8076	0
65,84	17.8998	0
65,79	7.60001	0
65,66	3.79471	0
79,95	21.9653	0
82,85	4.89135	0
79113	19.9268	0
82,84	5.64818	0
95113	31.3775	0
95103	18.5062	0
92113	28.0105	0
92103	16.8914	0
92,95	9.20954	0
85113	20.4992	0
85103	16.3521	0
85,95	29.8084	0
85,92	23.3659	0
84113	24.2196	0
84103	18.7546	0
84,95	30.4956	0
84,92	23.6868	0
84,85	3.80888	0
83113	24.4726	0
83103	21.2745	0
83,95	32.607	0
83,92	25.1512	0
83,85	5.5319	0
83,84	3.81883	0
82113	21.1223	0
82103	19.0888	0
82,95	30.7264	0
82,92	23.2448	0
64103	19.172	0
64113	14.9651	0
64,85	15.8672	0
64,95	28.1194	0
36,79	14.3715	0
36,66	15.5913	0
36,65	13.3091	0
36,64	11.2392	0
36,57	6.89995	0
35113	15.6069	0
35103	17.3896	0
35,95	31.686	0
35,92	25.1319	0
35,85	6.71456	0
35,84	9.92962	0
35,83	9.15392	0
35,82	6.18982	0
35,79	11.7617	0
35,65	12.6866	0
35,64	11.4356	0
35,57	6.78071	0
35,36	3.79759	0
30113	14.5655	0
30103	15.3432	0
30,95	31.2566	0
30,92	25.5795	0
30,79	13.3504	0
30,64	13.948	0
64,92	21.0014	0
103113	16.7019	0
36,82	9.61617	0
57,85	11.6473	0
30,36	5.52859	0
64,84	18.1228	0
64,83	16.8521	0
64,82	13.1257	0
64,79	9.92335	0
64,66	6.46889	0
64,65	3.80091	0
57113	12.6008	0
57103	16.0892	0
57,92	21.6475	0
57,95	28.2415	0
57,84	14.5499	0
57,83	13.8037	0
57,79	9.23215	0
57,64	5.22309	0
36113	13.5407	0
36103	19.0936	0
36,95	33.8645	0
36,92	27.5486	0
36,85	10.3958	0
36,84	13.6134	0
35,66	15.3494	-0.171252
36,83	12.5047	-0.243498
65,82	13.6349	-0.24644
30,65	14.654	-0.253553
30,66	16.6928	-0.431946
82,83	3.81543	-0.559714

## Sheet: CR9114_H3_pairwise
sites	distance	second order effect
64,65	3.79075	0.785454
35,36	3.79629	0.651935
30,64	13.92	0.473777
30,36	5.49455	0.425734
30,35	3.80491	0.422113
35,65	12.7072	0.415864
35113	15.6401	0.376532
36,65	13.3236	0.319464
35,64	11.4188	0.212059
30113	14.5669	0.182692
35,84	9.9137	0.18252
35,85	6.70755	0.170701
65,84	17.9	0.166176
65103	16.7472	0
65113	15.6398	0
95113	31.3702	0
66,79	10.1663	0
79,85	11.276	0
65,95	24.333	0
66,84	20.8593	0
66,85	18.5176	0
66,92	16.7261	0
66,95	22.7561	0
95103	18.496	0
65,92	17.2631	0
66103	15.9758	0
66113	14.4501	0
79,84	12.2572	0
92,95	9.1931	0
79,92	14.0611	0
79,95	21.9611	0
85113	20.502	0
79113	19.9294	0
84,85	3.81292	0
65,85	15.8174	0
84,92	23.6763	0
84,95	30.485	0
84103	18.7713	0
84113	24.2248	0
85,92	23.3531	0
92113	27.9896	0
92103	16.867	0
85,95	29.7963	0
85103	16.3599	0
79103	14.6927	0
64,95	28.1033	0
65,79	7.60438	0
36,79	14.3595	0
30,65	14.6717	0
30,79	13.3493	0
30,84	10.4351	0
30,85	6.69309	0
30,92	25.577	0
30,95	31.2636	0
30103	15.3656	0
35,79	11.7549	0
35,92	25.1263	0
35,95	31.6905	0
35103	17.4153	0
36,64	11.2265	0
65,66	3.80824	0
36,66	15.5814	0
36,84	13.6013	0
36,85	10.3842	0
36,92	27.5274	0
36,95	33.8481	0
36103	19.0822	0
36113	13.5478	0
64,79	9.90573	0
64,84	18.093	0
64,85	15.8426	0
64,92	20.9807	0
64103	19.1468	0
64113	14.9678	0
103113	16.6856	0
35,66	15.3539	-0.22316
30,66	16.6829	-0.254173
64,66	6.46907	-0.292586

## Sheet: CR6261_H1_pairwise
sites	distance	second order effect
85,87	7.10439	1.03945
29,35	6.37291	0.975819
35,82	7.82526	0.720318
35,87	10.7962	0.530484
29,66	22.0041	0.48549
35,85	7.63328	0.479974
29112.1	19.042	0.474777
83,84	3.82008	0.465682
35,66	17.6779	0.384403
29,85	4.25984	0.383413
35112.1	13.4658	0.339445
69112.1	15.1225	0
69,87	20.4843	0
69,85	27.0946	0
82,84	5.35028	0
69,84	28.9747	0
69,83	29.7844	0
69,82	26.1573	0
66112.1	8.01072	0
82,83	3.84012	0
82,87	7.81933	0
82,85	4.94469	0
66,85	19.6145	0
82112.1	17.1822	0
83,85	5.54261	0
83112.1	20.8379	0
84,87	8.70885	0
84112.1	20.8713	0
85112.1	17.7197	0
66,87	14.0322	0
66,69	9.44619	0
66,84	21.6966	0
65,66	3.77096	0
29,69	30.1069	0
29,82	6.34987	0
29,83	5.75012	0
29,84	6.1997	0
29,87	11.0077	0
35,65	15.3406	0
35,69	26.2568	0
35,83	9.93452	0
66,83	21.745	0
87112.1	14.2013	0
65,69	12.6569	0
65,82	14.6496	0
65,83	18.4228	0
65,84	18.6683	0
65,85	16.8978	0
65,87	11.6968	0
65112.1	8.94469	0
29,65	19.2375	0
66,82	17.9422	0
84,85	3.8507	-0.446572
35,84	10.8718	-0.538389
83,87	10.5333	-0.642352

## Sheet: CR6261_H9_pairwise
sites	distance	second order effect
82,83	3.84012	2.29753
29,35	6.37291	1.8181
29,82	6.34987	1.678
35,82	7.82526	1.32707
35,87	10.7962	1.23549
35,85	7.63328	1.12422
82112.1	17.1822	0.863981
85,87	7.10439	0.606483
29,87	11.0077	0.5868
66112.1	8.01072	0
69,82	26.1573	0
69,83	29.7844	0
82,84	5.35028	0
69,85	27.0946	0
69,87	20.4843	0
69112.1	15.1225	0
66,87	14.0322	0
69,84	28.9747	0
82,87	7.81933	0
82,85	4.94469	0
66,84	21.6966	0
83,84	3.82008	0
83,85	5.54261	0
83,87	10.5333	0
83112.1	20.8379	0
84,85	3.8507	0
84,87	8.70885	0
84112.1	20.8713	0
85112.1	17.7197	0
66,85	19.6145	0
66,69	9.44619	0
66,83	21.745	0
66,82	17.9422	0
29,66	22.0041	0
29,69	30.1069	0
29,83	5.75012	0
29,84	6.1997	0
29,85	4.25984	0
29112.1	19.042	0
35,65	15.3406	0
35,66	17.6779	0
35,69	26.2568	0
35,83	9.93452	0
87112.1	14.2013	0
35112.1	13.4658	0
65,66	3.77096	0
65,69	12.6569	0
65,82	14.6496	0
65,83	18.4228	0
65,84	18.6683	0
65,85	16.8978	0
65,87	11.6968	0
65112.1	8.94469	0
29,65	19.2375	0
35,84	10.8718	-1.04408
