# Supplementary material for: Binding affinity landscapes constrain the evolution of broadly neutralizing anti-influenza antibodies
Source: eLife. 2021 Sep 7;10:e71393. doi: 10.7554/eLife.71393 (PMC8476123; doi:10.7554/eLife.71393)
Supplement: Figure 5—source data 1. — Mean and standard error across 10 bootstrap samples are reported for moderate, weak, and strong selection strengths. [file elife-71393-fig5-data1.csv]

ScenarioType	Ag1	Ag2	Ag3	Ag4	Ag5	Ag6	Ag7	Ag8	Ag9	Ag10	Ag11	Ag12	Ag13	Ag14	Ag15	Ag16	MeanLogProb_Moderate	StdErrLogProb_Moderate	MeanLogProb_Weak	StdErrLogProb_Weak	MeanPaths_Strong	StdErrPaths_Strong
sequential	H1	H1	H1	H1	H1	H3	H3	H3	H3	H3	H3	H3	H3	FluB	FluB	FluB	-12.456034621952618	1.037490497330258	-10.180257817265911	0.27373478648170446	12021371.3	9013945.972715737
sequential	H1	H1	H1	H1	H1	H1	H3	H3	H3	H3	H3	H3	H3	FluB	FluB	FluB	-12.663612277932549	1.1458398199688695	-10.163163543419637	0.27948611967129916	21052293.6	14700308.185977282
sequential	H1	H1	H1	H1	H1	H3	H3	H3	H3	H3	H3	H3	FluB	FluB	FluB	FluB	-12.8618868562573	0.7778492939707876	-10.622305976377048	0.27282075881133605	3947722.4	2314284.5606023185
sequential	H1	H1	H1	H1	H1	H1	H3	H3	H3	H3	H3	H3	FluB	FluB	FluB	FluB	-13.235155832432914	0.9470502187418578	-10.6281841617226	0.2789737301275144	6170172.1	3376908.037726012
sequential	H1	H1	H1	H1	H3	H3	H3	H3	H3	H3	H3	H3	H3	FluB	FluB	FluB	-13.425261946689202	0.9993566601565761	-10.284435554095827	0.26754033624183937	3652536.5	2941755.848634328
sequential	H1	H1	H1	H1	H1	H1	H1	H3	H3	H3	H3	H3	H3	FluB	FluB	FluB	-13.658795720300947	1.2015270313631596	-10.238379043140565	0.2784499583206086	23549710.2	14469741.536934443
sequential	H1	H1	H1	H1	H3	H3	H3	H3	H3	H3	H3	H3	FluB	FluB	FluB	FluB	-13.749066412093418	0.7683935346557493	-10.723600630785977	0.26535062696028316	1294241.7	852553.533939339
sequential	H1	H1	H1	H1	H1	H1	H3	H3	H3	H3	H3	H3	H3	H3	FluB	FluB	-13.761370884000527	1.1089866083953988	-9.996776609085904	0.2708194658287761	36163978.3	21809472.09371283
sequential	H1	H1	H1	H1	H1	H3	H3	H3	H3	H3	H3	H3	H3	H3	FluB	FluB	-13.892709622301062	1.1134789409425079	-10.03766892137555	0.265004574255277	16903141.5	11509752.565041259
sequential	H1	H1	H1	H1	H1	H1	H1	H3	H3	H3	H3	H3	H3	H3	FluB	FluB	-14.190426519517601	1.0733751569653802	-10.020204880807778	0.2731785295400782	51497063.3	24934138.89071686
sequential	H1	H1	H1	H1	H1	H1	H1	H3	H3	H3	H3	H3	H3	H3	H3	FluB	-14.339557337748621	0.8122246336150475	-9.982825661081188	0.2547458959462839	100698623.0	25254760.731891613
sequential	H1	H1	H1	H1	H1	H1	H1	H3	H3	H3	H3	H3	FluB	FluB	FluB	FluB	-14.493018848861789	1.0645020405509396	-10.743739736400576	0.2779606956438652	5794035.6	2762602.242307109
sequential	H1	H1	H1	H1	H1	H1	H3	H3	H3	H3	H3	H3	H3	H3	H3	FluB	-14.51416649083501	0.6364091354890796	-9.995415610535845	0.2515052079554308	54761036.2	17258051.381172497
sequential	H1	H1	H1	H1	H1	H1	H1	H3	H3	H3	H3	H3	H3	H3	H3	H3	-14.69702313893193	0.881812787404604	-10.380168805653375	0.24306240133527438	142408902.1	36530048.69803382
sequential	H1	H1	H1	H1	H1	H1	H3	H3	H3	H3	H3	H3	H3	H3	H3	H3	-14.840430619815516	0.8399934113023099	-10.390492359814557	0.24499729919952298	76510511.7	22604423.540030025
sequential	H1	H1	H1	H1	H3	H3	H3	H3	H3	H3	H3	H3	H3	H3	FluB	FluB	-14.98160329104495	1.0810888300588566	-10.139551781335244	0.26076774310662365	4674749.2	3642675.2934884974
sequential	H1	H1	H1	H1	H1	H1	H1	H1	H3	H3	H3	H3	H3	H3	H3	FluB	-15.024904419738414	0.8490121914126143	-10.025545373735168	0.2566972029324957	118964505.3	30661833.726728722
sequential	H1	H1	H1	H1	H1	H3	H3	H3	H3	H3	H3	H3	H3	H3	H3	FluB	-15.086622536457575	0.6313515341580472	-10.051618257235072	0.2480971203286138	19252926.4	6877825.037877231
sequential	H1	H1	H1	H1	H1	H1	H1	H1	H3	H3	H3	H3	H3	FluB	FluB	FluB	-15.24262190230812	1.2233309316720762	-10.412133969683218	0.28087219516818857	21924676.0	12980145.91722008
sequential	H1	H1	H1	H1	H1	H1	H1	H1	H3	H3	H3	H3	H3	H3	FluB	FluB	-15.275058045270711	1.0534946489345896	-10.119425243911664	0.27758292118698186	55004498.4	26027779.184815165
sequential	H1	H1	H1	H1	H1	H1	H1	H1	H3	H3	H3	H3	H3	H3	H3	H3	-15.377462815677365	0.9408477831710387	-10.421975006437298	0.24182941631978097	167042437.9	40757356.564387396
sequential	H1	H1	H1	H1	H1	H3	H3	H3	H3	H3	H3	H3	H3	H3	H3	H3	-15.433175506075157	0.7178607630607391	-10.443317981553863	0.2393173848984393	26891804.1	8081993.357665015
sequential	H1	H1	H1	H1	H1	H1	H1	H1	H1	H3	H3	H3	H3	H3	H3	FluB	-16.256023433897415	0.9308963096809143	-10.136055423619881	0.25902350468663743	116554602.9	28177014.082933534
sequential	H1	H1	H1	H1	H1	H1	H1	H1	H3	H3	H3	H3	FluB	FluB	FluB	FluB	-16.293510869088006	1.1170344752815387	-10.974768099890118	0.27991866245617686	4933475.4	2310591.2074130005
sequential	H1	H1	H1	H1	H3	H3	H3	H3	H3	H3	H3	H3	H3	H3	H3	FluB	-16.477694814450025	0.8493488489831659	-10.148252360203829	0.24577564551272763	3903947.1	1822608.5425371
sequential	H1	H1	H1	H1	H1	H1	H1	H1	H1	H3	H3	H3	H3	H3	H3	H3	-16.624500567128486	1.038755449921308	-10.528864402031404	0.23999473538303465	162347629.0	38843121.12537362
sequential	H1	H1	H1	H3	H3	H3	H3	H3	H3	H3	H3	H3	H3	FluB	FluB	FluB	-16.68278757583958	0.9363639013523509	-10.416515962878197	0.25258340233634585	0.0	0.0
sequential	H1	H1	H1	H1	H1	H1	H1	H1	H1	H3	H3	H3	H3	H3	FluB	FluB	-16.79297951281254	1.0850684303906093	-10.298543898103805	0.28100435957196573	48793635.4	20965926.06070362
sequential	H1	H1	H1	H1	H3	H3	H3	H3	H3	H3	H3	H3	H3	H3	H3	H3	-16.847207451559257	0.8390512705201384	-10.53390506977958	0.2378301778492678	5419457.8	1900258.019040385
sequential	H1	H1	H1	H3	H3	H3	H3	H3	H3	H3	H3	H3	FluB	FluB	FluB	FluB	-17.000275427105837	0.6850237490916629	-10.864264238064731	0.24976504689595613	0.0	0.0
sequential	H1	H1	H1	H1	H1	H3	H3	H3	H3	H3	H3	FluB	FluB	FluB	FluB	FluB	-17.03400588399327	0.8573883781134475	-11.114564560262037	0.2677346363411125	133583.2	103166.02782763971
sequential	H1	H1	H1	H1	H1	H1	H1	H1	H1	H3	H3	H3	H3	FluB	FluB	FluB	-17.28912897908284	1.2828011589078157	-10.685129319181772	0.2827206106768056	17203815.0	9619671.445712443
sequential	H1	H1	H1	H1	H1	H1	FluB	H3	H3	H3	H3	H3	H3	H3	H3	H3	-17.32389202797191	0.8400671135630526	-10.447128661198935	0.24281810446229654	0.0	0.0
sequential	H1	H1	H1	H1	H3	H3	H3	H3	H3	H3	H3	FluB	FluB	FluB	FluB	FluB	-17.50190479571425	0.7778214088755374	-11.210066408247505	0.25956896462625156	45023.5	34151.20463874997
sequential	FluB	H1	H1	H1	H1	H1	H1	H3	H3	H3	H3	H3	H3	H3	H3	H3	-17.54706677894682	0.7072746588940693	-10.838245032266961	0.24173976534465347	0.0	0.0
sequential	H1	H1	H1	H1	H1	H1	H3	H3	H3	H3	H3	FluB	FluB	FluB	FluB	FluB	-17.611902933249315	1.0154843429508964	-11.149307906985497	0.2741895230708809	278271.2	177821.65839639568
sequential	H1	H1	H1	H1	H1	FluB	H3	H3	H3	H3	H3	H3	H3	H3	H3	H3	-17.707457757759514	0.6993881427625357	-10.47069917404619	0.23851616112661908	0.0	0.0
sequential	FluB	H1	H1	H1	H1	H1	H1	H1	H3	H3	H3	H3	H3	H3	H3	H3	-17.730927819408674	0.651470532957092	-10.856944703605615	0.23971526608902263	0.0	0.0
sequential	H1	H1	H1	H1	H1	H1	H1	FluB	H3	H3	H3	H3	H3	H3	H3	H3	-17.893770742949442	0.9126342771822333	-10.484702916278168	0.2405713586628364	0.0	0.0
sequential	H1	H1	H1	H1	H1	H1	H1	H1	H1	H1	H3	H3	H3	H3	H3	FluB	-17.968266469105853	1.029035500172471	-10.327566761633028	0.259669623855383	100186395.1	28815441.741661295
sequential	FluB	H1	H1	H1	H1	H1	H3	H3	H3	H3	H3	H3	H3	H3	H3	H3	-18.22636560896102	0.4949403343140523	-10.874711257631384	0.2439530229069429	0.0	0.0
sequential	H1	H1	H1	H3	H3	H3	H3	H3	H3	H3	H3	H3	H3	H3	FluB	FluB	-18.25686425386048	1.0410801308797202	-10.255254114919133	0.247398025746688	0.0	0.0
sequential	FluB	H1	H1	H1	H1	H1	H1	H1	H1	H3	H3	H3	H3	H3	H3	H3	-18.324969071924574	0.726107177803993	-10.941538802295408	0.236016777296688	0.0	0.0
sequential	H1	H1	H1	H1	H1	H1	H1	H1	H1	H1	H3	H3	H3	H3	H3	H3	-18.362367098866255	1.1188917808474288	-10.712100681474993	0.23393066722006917	138752671.0	38287483.62570122
sequential	H1	H1	H1	H1	FluB	H3	H3	H3	H3	H3	H3	H3	H3	H3	H3	H3	-18.510595521338008	0.5887533577298905	-10.543515301602511	0.23773300556925014	0.0	0.0
sequential	H1	H1	H1	H1	H1	H1	H1	H1	H1	H3	H3	H3	FluB	FluB	FluB	FluB	-18.58457555550314	1.1528173642208581	-11.321728497066552	0.28094724825319506	3657904.9	1621743.4565305498
sequential	H1	H1	H1	H1	H1	H1	H1	H1	H1	H1	H3	H3	H3	H3	FluB	FluB	-18.714928216803123	1.1129542802973253	-10.571041217331596	0.28303973411492134	40679995.1	18630867.00692965
sequential	H1	H1	H1	H1	H1	H1	H1	H3	H3	H3	H3	FluB	FluB	FluB	FluB	FluB	-18.941484385080123	1.1992425323324651	-11.31290512203704	0.2734429233414742	313437.9	195227.139946411
sequential	H1	H1	H1	H1	H1	H1	H1	H1	FluB	H3	H3	H3	H3	H3	H3	H3	-18.95835391601391	0.9880426977936981	-10.588214389611004	0.23675926483215964	145859.1	148558.157791972
sequential	FluB	H1	H1	H1	H1	H3	H3	H3	H3	H3	H3	H3	H3	H3	H3	H3	-19.232020053756933	0.44900622549374136	-10.964480518798348	0.23457261254141445	0.0	0.0
sequential	FluB	H1	H1	H1	H1	H1	H1	H1	H1	H1	H3	H3	H3	H3	H3	H3	-19.525621501012477	0.8580358904933083	-11.104727578466415	0.23056514229276964	0.0	0.0
sequential	H1	H1	H1	H1	H1	H1	H1	H1	H1	H1	H3	H3	H3	FluB	FluB	FluB	-19.564454026321478	1.328400419739636	-11.067215999604153	0.28372082359441725	13368973.1	7565263.450617323
sequential	H1	H1	H1	H3	H3	H3	H3	H3	H3	H3	H3	H3	H3	H3	H3	FluB	-19.785923880164013	0.6822050144567247	-10.248945302280019	0.2304535262622448	0.0	0.0
sequential	FluB	FluB	H1	H1	H1	H1	H1	H1	H3	H3	H3	H3	H3	H3	H3	H3	-20.064873887806414	0.328617383769515	-10.54213607334612	0.19359932672832048	0.0	0.0
sequential	H1	H1	H1	H1	H1	H1	H1	H1	H1	H1	H1	H3	H3	H3	H3	FluB	-20.09549981864129	1.1201343196839924	-10.604684497583786	0.26201862842915585	83991574.2	25558000.943864256
sequential	H1	H1	H1	H3	H3	H3	H3	H3	H3	H3	H3	H3	H3	H3	H3	H3	-20.12617867358173	0.7168514379926346	-10.626950113967487	0.23731347227457103	0.0	0.0
sequential	H1	H1	H1	FluB	H3	H3	H3	H3	H3	H3	H3	H3	H3	H3	H3	H3	-20.12617867358173	0.7168514379926346	-10.626950113967487	0.23731347227457103	0.0	0.0
sequential	H1	H1	H1	H1	H1	FluB	FluB	H3	H3	H3	H3	H3	H3	H3	H3	H3	-20.216143934858703	0.7160306883849561	-10.525438433368931	0.23635175794419092	0.0	0.0
sequential	FluB	FluB	H1	H1	H1	H1	H1	H3	H3	H3	H3	H3	H3	H3	H3	H3	-20.33077002837076	0.30305954429296705	-10.568798314773783	0.1961474426548432	0.0	0.0
sequential	FluB	FluB	H1	H1	H1	H1	H1	H1	H1	H3	H3	H3	H3	H3	H3	H3	-20.362184996387985	0.32463298465493046	-10.58909506931504	0.1895790281818868	0.0	0.0
sequential	H1	H1	H1	H1	H1	H1	H1	H1	H1	FluB	H3	H3	H3	H3	H3	H3	-20.44902210352931	1.0471173303739973	-10.769735119146032	0.2338241951398382	1721524.7	671207.8139463797
sequential	H1	H1	H1	H1	H1	H1	H1	H1	H1	H1	H1	H3	H3	H3	H3	H3	-20.46898412089699	1.20723604611645	-10.971961449545452	0.23237146770780973	116026340.8	35352878.65974387
sequential	H1	H1	H1	H1	H1	H1	FluB	FluB	H3	H3	H3	H3	H3	H3	H3	H3	-20.513276617767122	0.8665998879405529	-10.548481031032075	0.24046361764763044	0.0	0.0
sequential	H1	H1	H1	H1	H1	H3	H3	H3	H3	H3	FluB	FluB	FluB	FluB	FluB	FluB	-20.522295066704256	1.6370565451116599	-11.718406046716314	0.26930550550040677	8027.4	14758.486772776612
sequential	H1	H1	H1	H3	H3	H3	H3	H3	H3	H3	H3	FluB	FluB	FluB	FluB	FluB	-20.745585865609918	0.7051091790845643	-11.357614530680285	0.24379097204815425	0.0	0.0
sequential	H1	H1	H1	H1	H1	H1	H1	H1	H3	H3	H3	FluB	FluB	FluB	FluB	FluB	-20.791548736347487	1.460661391602425	-11.610582822775392	0.27566844535991497	297016.7	205083.08902006305
sequential	H1	H1	H1	H1	H3	H3	H3	H3	H3	H3	FluB	FluB	FluB	FluB	FluB	FluB	-20.829801835624963	1.1768332924657812	-11.804102071376985	0.2606616378530031	2682.8	5457.380442015096
sequential	H1	H1	H1	H1	FluB	FluB	H3	H3	H3	H3	H3	H3	H3	H3	H3	H3	-20.881973571228862	0.6233841876667313	-10.569481589638709	0.23702135471541685	0.0	0.0
sequential	H1	H1	H1	H1	H1	H1	H1	H1	H1	H1	H1	H3	H3	H3	FluB	FluB	-20.90147729467044	1.1979882605512053	-10.944309391066872	0.28385618581058725	32750484.6	14877910.73424225
sequential	H1	H1	H3	H3	H3	H3	H3	H3	H3	H3	H3	H3	H3	FluB	FluB	FluB	-20.950116320703383	0.8426830167674663	-10.742651640403901	0.23913593732615243	0.0	0.0
sequential	H1	H1	H1	H1	H1	H1	H3	H3	H3	H3	FluB	FluB	FluB	FluB	FluB	FluB	-20.997919204300935	2.2960054564483205	-11.78098752552697	0.2750405097146251	17175.3	33043.361730543635
sequential	FluB	H1	H1	H1	H1	H1	H1	H1	H1	H1	H1	H3	H3	H3	H3	H3	-21.14885411842909	0.9884911270189654	-11.346678728202818	0.22599547676082488	0.0	0.0
sequential	FluB	FluB	H1	H1	H1	H1	H3	H3	H3	H3	H3	H3	H3	H3	H3	H3	-21.209228668023396	0.31738000455479815	-10.66486197310176	0.19647526399509058	0.0	0.0
sequential	H1	H1	H3	H3	H3	H3	H3	H3	H3	H3	H3	H3	FluB	FluB	FluB	FluB	-21.24720622247883	0.5534508646407575	-11.200253905698247	0.23671874697990086	0.0	0.0
sequential	H1	H1	H1	H1	H1	H1	H1	H1	H1	H1	H3	H3	FluB	FluB	FluB	FluB	-21.256324288486237	1.2048889652392536	-11.796975757490829	0.2809185657033645	2701267.0	1198090.3293087343
sequential	FluB	H1	H1	H1	H3	H3	H3	H3	H3	H3	H3	H3	H3	H3	H3	H3	-21.30896854626687	0.33687403777517166	-11.105153689175681	0.22964555293574818	0.0	0.0
sequential	H1	H1	H1	H1	H1	H1	H1	H1	H1	FluB	FluB	H3	H3	H3	H3	H3	-21.417152709267796	1.8639371809461969	-11.082771797882177	0.22791061011341734	1936564.8	1220693.0117550076
sequential	H1	H1	H1	H1	H1	H1	H1	FluB	FluB	H3	H3	H3	H3	H3	H3	H3	-21.426633395353424	0.9374256242872081	-10.648831532130142	0.235198030296076	0.0	0.0
sequential	FluB	FluB	H1	H1	H1	H1	H1	H1	H1	H1	H3	H3	H3	H3	H3	H3	-21.43656390081937	0.26148678095572997	-10.723731434803735	0.18136051174538445	0.0	0.0
sequential	H1	H1	H1	H1	H1	H1	H1	H1	H1	FluB	FluB	FluB	H3	H3	H3	H3	-21.58583358958289	1.4558852133810962	-11.479408536315809	0.22137126595335047	1015797.0	581594.9644062151
sequential	H1	H1	H1	H1	H1	H1	H1	H1	FluB	FluB	FluB	FluB	H3	H3	H3	H3	-21.630878426448923	1.1722584272914267	-11.530524614061376	0.21818692213678534	285485.0	137492.88670974137
sequential	H1	H1	H1	H1	H1	H1	H1	H1	H1	H1	FluB	H3	H3	H3	H3	H3	-21.703320794584002	1.5327012587272602	-11.029437822554746	0.2277129392508047	4031083.0	2207095.2911647875
sequential	H1	H1	H1	FluB	FluB	H3	H3	H3	H3	H3	H3	H3	H3	H3	H3	H3	-21.96613314247538	0.475056501050594	-10.636134782396313	0.23737614672683538	0.0	0.0
sequential	H1	H1	H1	H1	H1	H1	H1	H1	H1	H1	H1	H3	H3	FluB	FluB	FluB	-22.113320179065187	1.288910215287975	-11.583150721136827	0.28246980899200325	10005990.4	5596146.630035016
sequential	H1	H1	H1	H1	H1	H1	H1	H1	FluB	FluB	FluB	H3	H3	H3	H3	H3	-22.169120346526654	2.2000882092803415	-11.134924602053902	0.22496367752162344	358270.6	161879.4817182764
sequential	H1	H1	H1	H1	H1	H1	H1	H1	H1	H1	H1	H1	H3	H3	H3	FluB	-22.23410336622404	1.1668784941018155	-11.000408409191225	0.255298717340183	65890001.6	21351539.471441522
sequential	H1	H1	H1	H1	H1	H1	H1	H3	H3	H3	FluB	FluB	FluB	FluB	FluB	FluB	-22.342129296342282	2.590732106962789	-11.986427030752854	0.2736038818685722	19803.1	40159.921686648966
sequential	H1	H1	H1	H1	H1	H1	H1	H1	H1	FluB	FluB	FluB	FluB	FluB	H3	H3	-22.46093458437145	1.6436418023011359	-12.477852675652029	0.21979395066354013	256345.9	138262.32536936607
sequential	H1	H1	H3	H3	H3	H3	H3	H3	H3	H3	H3	H3	H3	H3	FluB	FluB	-22.52348587609039	0.9717390985765884	-10.56320575600251	0.22695958887104972	0.0	0.0
sequential	H1	H1	H1	H1	H1	H1	H1	H1	FluB	FluB	FluB	FluB	FluB	FluB	H3	H3	-22.532114717863706	1.8724354998173738	-12.53076361213682	0.21669471864798312	59228.9	39778.654159821286
sequential	H1	H1	H1	H1	H1	H1	H1	H1	H1	H1	H1	H1	H3	H3	H3	H3	-22.55474081693362	1.2675550423317274	-11.332122910601427	0.2221217558859741	89429534.4	28007774.44447476
sequential	H1	H1	H1	H1	H1	H1	H1	H1	FluB	FluB	H3	H3	H3	H3	H3	H3	-22.630377352366327	1.052983511202397	-10.82497641632061	0.23087996419416482	261832.7	130446.11046971763
sequential	FluB	FluB	H1	H1	H1	H3	H3	H3	H3	H3	H3	H3	H3	H3	H3	H3	-22.663684025077604	0.3183689801485486	-10.843549133865967	0.18975430725881878	0.0	0.0
sequential	H1	H1	H1	H1	H1	H1	H1	H1	H1	H1	FluB	FluB	H3	H3	H3	H3	-22.71186240296096	1.369386030222442	-11.428778485146898	0.22150358290486422	2396080.2	1136219.4069945586
sequential	FluB	FluB	H1	H1	H1	H1	H1	H1	H1	H1	H1	H3	H3	H3	H3	H3	-22.771904579468966	0.21563109150546364	-10.942773397073212	0.17232823011014634	0.0	0.0
sequential	H1	H1	H1	H1	H1	H1	H1	H1	H1	H1	FluB	FluB	FluB	FluB	H3	H3	-22.930950066374262	1.3387149506156182	-12.423944196196102	0.2201219014767288	674690.6	287167.81369637436
sequential	FluB	H1	H1	H1	H1	H1	H1	H1	H1	H1	H1	H1	H3	H3	H3	H3	-22.955262396739787	1.0497336622938898	-11.685910597717836	0.21893441365708985	0.0	0.0
sequential	FluB	FluB	FluB	H1	H1	H1	H1	H1	H3	H3	H3	H3	H3	H3	H3	H3	-22.97391374319639	0.281635827422346	-10.514095375817538	0.17349923802636597	0.0	0.0
sequential	FluB	FluB	FluB	H1	H1	H1	H1	H1	H1	H3	H3	H3	H3	H3	H3	H3	-23.109121797121325	0.2706081680153479	-10.510733680489535	0.16855004806368418	0.0	0.0
sequential	H1	H1	H1	H1	H1	H1	H1	H1	H1	H3	H3	FluB	FluB	FluB	FluB	FluB	-23.164098808206614	1.486215653182993	-12.042238347283666	0.2765069890695921	229482.3	149972.2422821044
sequential	H1	H1	H1	H1	H1	H1	H1	H1	H1	H1	H1	H1	H3	H3	FluB	FluB	-23.260843906441384	1.2260360611726953	-11.463772071830535	0.27868124488482426	24106830.6	11318910.990518441
sequential	FluB	FluB	FluB	H1	H1	H1	H1	H3	H3	H3	H3	H3	H3	H3	H3	H3	-23.400505118609292	0.3064719285450842	-10.609873869674878	0.17667668506004972	0.0	0.0
sequential	H1	H1	H1	H1	H1	FluB	FluB	FluB	H3	H3	H3	H3	H3	H3	H3	H3	-23.41051468652244	0.73631666226665	-10.624498142840084	0.23396769761066694	0.0	0.0
sequential	H1	H1	H1	H1	FluB	FluB	FluB	H3	H3	H3	H3	H3	H3	H3	H3	H3	-23.417626722544043	0.6999022237094771	-10.621467667153285	0.23509502804610857	0.0	0.0
sequential	H1	H1	H1	H1	H1	H1	H1	H1	H1	H1	H1	FluB	FluB	FluB	H3	H3	-23.465516860853572	1.36643880255228	-12.371933042654554	0.22316272355981487	2324527.6	803017.8987558539
sequential	H1	H1	H1	H1	H1	H1	H1	H1	H1	FluB	FluB	FluB	FluB	H3	H3	H3	-23.484619251898426	1.3084260921189916	-11.9549256124564	0.2150055666723222	404195.9	232747.33990290368
sequential	H1	H1	H1	H1	H1	H1	H1	H1	H1	H1	H1	FluB	H3	H3	H3	H3	-23.554493825883085	1.2631248983805308	-11.37518687513679	0.225429078490082	5669202.2	2737183.70873092
sequential	H1	H1	H1	H1	H1	H1	H1	H1	H1	H1	FluB	FluB	FluB	H3	H3	H3	-23.580498543153595	1.4239277379682307	-11.903515205877074	0.21518606455928688	1150778.6	568420.05457451
sequential	FluB	FluB	FluB	H1	H1	H1	H1	H1	H1	H1	H3	H3	H3	H3	H3	H3	-23.903377228357787	0.24340164779823148	-10.608781616531868	0.15966715246974653	0.0	0.0
sequential	H1	H1	H1	H1	H1	H1	H1	H1	H1	H1	H1	FluB	FluB	H3	H3	H3	-23.9903229208339	1.718462418547227	-11.850322478873926	0.21789098896488987	3558133.9	1894835.4041194567
sequential	H1	H1	H3	H3	H3	H3	H3	H3	H3	H3	H3	H3	H3	H3	H3	FluB	-24.0263485935295	0.6028836460217761	-10.53718496835717	0.2121770430098918	0.0	0.0
sequential	H1	H1	H1	H1	H1	H1	H1	H1	H3	H3	FluB	FluB	FluB	FluB	FluB	FluB	-24.039459401285367	2.782875941781065	-12.333525260095533	0.2740838423252067	17179.3	34765.12451053977
sequential	H1	H1	H1	H1	H1	H1	FluB	FluB	FluB	H3	H3	H3	H3	H3	H3	H3	-24.057595806802027	0.8796234627786965	-10.709137359153539	0.23528377884517623	0.0	0.0
sequential	H1	H1	H1	H1	H1	H1	H1	H1	FluB	FluB	FluB	FluB	FluB	H3	H3	H3	-24.086695166043242	1.1514092705210757	-12.005594141122108	0.211964534442314	73181.6	25738.58774162509
sequential	H1	H1	H1	H1	H1	H1	H1	H1	H1	H1	H1	H3	FluB	FluB	FluB	FluB	-24.09411262971201	1.2381491990505176	-12.438009683114286	0.27778262464273945	1676139.0	820745.7558996778
sequential	H1	H1	H1	H3	H3	H3	H3	H3	H3	H3	FluB	FluB	FluB	FluB	FluB	FluB	-24.15955686143622	1.0497340997925735	-11.951365824317687	0.2453613533704896	0.0	0.0
sequential	FluB	FluB	H1	H1	H1	H1	H1	H1	H1	H1	H1	H1	H3	H3	H3	H3	-24.1760611187537	0.1982473467782589	-11.258350823592007	0.15716547964576177	0.0	0.0
sequential	H1	H1	H1	H1	H1	H1	H1	H1	H1	H1	H1	H1	FluB	FluB	H3	H3	-24.176672482353823	1.3641442623963291	-12.334353933611295	0.2223516140223559	8440868.8	2373505.451557103
sequential	H1	H1	H1	H1	H1	H1	H1	H1	H1	H1	H1	FluB	FluB	FluB	FluB	H3	-24.26995849446716	1.7829542200390958	-12.746961938595982	0.2162893926182588	1582461.7	709277.8692275764
sequential	H1	H1	H1	FluB	FluB	FluB	H3	H3	H3	H3	H3	H3	H3	H3	H3	H3	-24.37069033010905	0.46637767483073667	-10.66033994939686	0.2368888835290848	0.0	0.0
sequential	H1	H1	FluB	FluB	H3	H3	H3	H3	H3	H3	H3	H3	H3	H3	H3	H3	-24.375652666666735	0.6309896984364686	-10.9105158660303	0.22077989445157092	0.0	0.0
sequential	H1	H1	H3	H3	H3	H3	H3	H3	H3	H3	H3	H3	H3	H3	H3	H3	-24.375652666666735	0.6309896984364686	-10.9105158660303	0.22077989445157092	0.0	0.0
sequential	H1	H1	FluB	H3	H3	H3	H3	H3	H3	H3	H3	H3	H3	H3	H3	H3	-24.375652666666735	0.6309896984364686	-10.9105158660303	0.22077989445157092	0.0	0.0
sequential	H1	H1	H1	H1	H1	H1	H1	FluB	FluB	FluB	FluB	FluB	H3	H3	H3	H3	-24.49085001459143	1.2243024017351016	-11.58267684668781	0.21619426554789242	0.0	0.0
sequential	H1	H1	H1	H1	H1	H1	H1	H1	H1	H1	FluB	FluB	FluB	FluB	FluB	H3	-24.517928206284317	2.0678028715587002	-12.803224981867428	0.21436440996617626	295691.7	153089.983542759
sequential	H1	H1	H1	H1	H1	H1	H1	H1	H1	H1	H1	H1	FluB	FluB	FluB	H3	-24.65561190772328	1.4344445524311897	-12.701800245186494	0.21502441860460453	6913565.8	2766382.7155590267
sequential	H1	H1	H1	H1	H1	H1	H1	H1	H1	FluB	FluB	FluB	FluB	FluB	FluB	H3	-24.67078634622894	1.503716886879075	-12.860924619505886	0.21339255369310994	80698.6	45164.08140251868
sequential	H1	H1	H1	H1	H1	H1	H1	H1	H1	H1	H1	H1	FluB	H3	H3	H3	-24.71314874403043	1.4302415447124703	-11.807955578141593	0.21535076013146376	10112785.6	3512042.826369772
sequential	FluB	FluB	FluB	H1	H1	H1	H3	H3	H3	H3	H3	H3	H3	H3	H3	H3	-24.733775682885756	0.3064867708625321	-10.79840793435668	0.17834163453043383	0.0	0.0
sequential	H1	H1	H1	H1	H1	H1	H1	H1	H1	H1	H1	H1	H3	FluB	FluB	FluB	-24.908621497885555	1.3234060885560923	-12.288694761505274	0.2778922947740699	6927049.7	4456733.350057343
sequential	FluB	H1	H1	H3	H3	H3	H3	H3	H3	H3	H3	H3	H3	H3	H3	H3	-24.935256582744262	0.3537771025460179	-11.281943039625263	0.22005538541236455	0.0	0.0
sequential	H1	H1	H1	H1	H1	H1	H1	FluB	FluB	FluB	FluB	H3	H3	H3	H3	H3	-24.937020413067568	2.2867050303847494	-11.189320164031212	0.22306564585942026	0.0	0.0
sequential	H1	H1	H3	H3	H3	H3	H3	H3	H3	H3	H3	FluB	FluB	FluB	FluB	FluB	-24.957756892278713	0.5632286448338176	-11.699872067017075	0.23152996930940828	0.0	0.0
sequential	H1	H1	H1	H1	H1	H1	H1	H1	H1	H1	H1	H1	H1	H3	H3	FluB	-24.965373488070643	1.119972400781863	-11.5336025987475	0.2563347657423928	41168751.8	13560630.579722086
sequential	H1	H1	H1	H1	H1	H3	H3	H3	H3	FluB	FluB	FluB	FluB	FluB	FluB	FluB	-24.967325181324615	1.618512376812073	-12.315804149361808	0.26281256668620895	1505.3	4760.176561851462
sequential	FluB	H1	H1	H1	H1	H1	H1	H1	H1	H1	H1	H1	H1	H3	H3	H3	-25.011329084042277	1.330355906436274	-12.13513724919229	0.20781999126978332	0.0	0.0
sequential	FluB	FluB	FluB	H1	H1	H1	H1	H1	H1	H1	H1	H3	H3	H3	H3	H3	-25.021593559483488	0.20965549694401694	-10.796096137615619	0.14918225852170175	0.0	0.0
sequential	H1	H1	H1	H1	H3	H3	H3	H3	H3	FluB	FluB	FluB	FluB	FluB	FluB	FluB	-25.055070708392197	1.8154727701845306	-12.388993925128773	0.2540989024597132	547.3	1730.714563410154
sequential	H1	H1	H1	H1	H1	H1	H1	FluB	FluB	FluB	H3	H3	H3	H3	H3	H3	-25.158493544321203	0.9552313456599759	-10.882155199925906	0.2291261717803113	0.0	0.0
sequential	H1	H1	H1	H1	H1	H1	H1	H1	H1	H1	H1	H1	H1	H3	H3	H3	-25.193646539699284	1.2653457673434492	-11.795366043619806	0.2174932144562871	54826532.0	16601708.452188568
sequential	FluB	FluB	H1	H1	H3	H3	H3	H3	H3	H3	H3	H3	H3	H3	H3	H3	-25.276207870371305	0.3572323238525566	-11.116415499728616	0.1882555970649667	0.0	0.0
sequential	H1	H1	H1	H1	H1	H1	H1	FluB	FluB	FluB	FluB	FluB	FluB	FluB	H3	H3	-25.47059573975164	1.8342720627406968	-12.584403895379065	0.21417706509389625	0.0	0.0
sequential	H1	H3	H3	H3	H3	H3	H3	H3	H3	H3	H3	H3	H3	FluB	FluB	FluB	-25.63659423875536	0.7068674137105038	-11.113429503569492	0.2562375147729451	0.0	0.0
sequential	H1	H1	H1	H1	H1	H1	H1	H1	H1	H1	H3	FluB	FluB	FluB	FluB	FluB	-25.665114911799165	1.6568667084821638	-12.622330496955454	0.2756324189971898	191712.6	133906.1157413407
sequential	FluB	FluB	H1	H1	H1	H1	H1	H1	H1	H1	H1	H1	H1	H3	H3	H3	-25.747308102032513	0.24452667405578096	-11.687605916448682	0.13705296132959285	0.0	0.0
sequential	H1	H1	H1	H1	H1	H1	H3	H3	H3	FluB	FluB	FluB	FluB	FluB	FluB	FluB	-25.86692576732339	2.0159797293544264	-12.404161667183118	0.26926807697505273	2539.5	8030.604117997599
sequential	H1	H3	H3	H3	H3	H3	H3	H3	H3	H3	H3	H3	FluB	FluB	FluB	FluB	-25.91161982561257	0.433812515968993	-11.5999229450347	0.25285304828314203	0.0	0.0
sequential	H1	H1	H1	H1	H1	H1	H1	H1	FluB	FluB	FluB	FluB	FluB	FluB	FluB	H3	-25.91192114093636	1.4465167459501318	-12.917800804335476	0.21017762984830338	11654.4	8477.061469374605
sequential	H1	H1	FluB	FluB	FluB	H3	H3	H3	H3	H3	H3	H3	H3	H3	H3	H3	-26.147119468020108	0.402650368363315	-10.918584774356193	0.22064152083293437	0.0	0.0
sequential	H1	H1	H1	H1	H1	H1	H1	H1	H1	H1	H1	H1	H1	H3	FluB	FluB	-26.221202584013543	1.2636320873477944	-12.188737246035112	0.2745317442691451	14799312.8	7558556.298685995
sequential	FluB	FluB	FluB	FluB	H1	H1	H1	H1	H1	H3	H3	H3	H3	H3	H3	H3	-26.257083304626953	0.23848910921789657	-10.527542614018483	0.1751380191281845	0.0	0.0
sequential	FluB	FluB	FluB	H1	H1	H1	H1	H1	H1	H1	H1	H1	H3	H3	H3	H3	-26.27980249624477	0.19514275398118275	-11.086983545421528	0.13213631358946315	0.0	0.0
sequential	FluB	FluB	FluB	FluB	H1	H1	H1	H1	H3	H3	H3	H3	H3	H3	H3	H3	-26.34142309643324	0.26367130214433093	-10.586150185595969	0.17895177846847624	0.0	0.0
sequential	H1	H1	H1	H1	H1	H1	H1	H1	H1	H3	FluB	FluB	FluB	FluB	FluB	FluB	-26.49392356686054	2.755863428287928	-12.819217014122234	0.2731306688618323	12574.1	28770.86323367985
sequential	H1	H1	H1	H1	FluB	FluB	FluB	FluB	H3	H3	H3	H3	H3	H3	H3	H3	-26.587089493695025	0.6892133218808421	-10.71657330673802	0.23285402459126492	0.0	0.0
sequential	H1	H1	H1	H1	H1	H1	H1	H1	H1	H1	H1	H1	H1	FluB	FluB	H3	-26.75606285335843	1.2699180730685882	-12.768762685742843	0.2123593068192637	14031626.8	6761252.967760846
sequential	FluB	FluB	FluB	FluB	H1	H1	H1	H1	H1	H1	H3	H3	H3	H3	H3	H3	-26.87410867065626	0.21672260118823283	-10.586693023567443	0.16676138449254277	0.0	0.0
sequential	H1	H1	H1	H1	H1	H1	H1	FluB	FluB	FluB	FluB	FluB	FluB	H3	H3	H3	-26.894185970071693	1.1047837660045063	-12.056664227616716	0.20971533164463002	0.0	0.0
sequential	H1	H1	H1	FluB	FluB	FluB	FluB	H3	H3	H3	H3	H3	H3	H3	H3	H3	-26.901710097038972	0.5066908489284095	-10.70912412330649	0.2350488116259388	0.0	0.0
sequential	FluB	FluB	FluB	H1	H1	H3	H3	H3	H3	H3	H3	H3	H3	H3	H3	H3	-26.911420541461556	0.35116519928290046	-11.102445800274362	0.1752039180500122	0.0	0.0
sequential	H1	H1	H1	H1	H1	FluB	FluB	FluB	FluB	H3	H3	H3	H3	H3	H3	H3	-26.9394255172956	0.7574972739377329	-10.782159312500353	0.22876195893550863	0.0	0.0
sequential	H1	H1	H1	H1	H1	H1	H1	H1	H1	H1	H1	H1	H1	FluB	H3	H3	-27.054963072354766	1.4113391381504479	-12.394878295639534	0.22187394401502103	11771670.8	3975500.3423227067
sequential	H1	H1	H1	H1	H1	H1	H1	H1	H1	H1	H1	H1	FluB	FluB	FluB	FluB	-27.076390245263894	1.242470838869506	-13.316519423268666	0.27143630140369607	1070061.7	518022.5305544259
sequential	FluB	FluB	FluB	FluB	H1	H1	H1	H3	H3	H3	H3	H3	H3	H3	H3	H3	-27.166355977352474	0.3113227880386154	-10.760193450545197	0.18034484183651475	0.0	0.0
sequential	FluB	H1	H1	H1	H1	H1	H1	H1	H1	H1	H1	H1	H1	H1	H3	H3	-27.18122377399359	1.5774860251589566	-12.821727002461694	0.19959740188308178	0.0	0.0
sequential	H1	H3	H3	H3	H3	H3	H3	H3	H3	H3	H3	H3	H3	H3	FluB	FluB	-27.233416470767846	0.8521298129606051	-10.887640581181119	0.2500544043569316	0.0	0.0
sequential	H1	H1	H1	H1	H1	H1	H1	H3	H3	FluB	FluB	FluB	FluB	FluB	FluB	FluB	-27.35233091627862	2.3328689072359916	-12.640433086003783	0.2692585625342676	2943.2	9307.215609407574
sequential	H1	H1	H1	H1	H1	H1	H1	H1	H1	H1	H1	H1	H1	H1	H3	FluB	-27.46405598019811	1.0995971133360554	-12.279581744963997	0.2522070682661639	28348655.4	8919433.904888026
mixed_average	average	average	average	average	average	average	average	average	average	average	average	average	average	average	average	average	-27.520609460692196	0.5658229782243711	-12.935292913411123	0.17911864040205114
sequential	H1	H1	H1	H1	H1	H1	FluB	FluB	FluB	FluB	FluB	FluB	H3	H3	H3	H3	-27.60223154533106	1.1267162656112508	-11.633975911716197	0.2158807476507079	0.0	0.0
sequential	FluB	FluB	H1	H1	H1	H1	H1	H1	H1	H1	H1	H1	H1	H1	H3	H3	-27.769007126573605	0.20206300695464421	-12.360875712904456	0.12144736448964996	0.0	0.0
sequential	H1	H1	H1	H1	H1	H1	H1	H1	H1	H1	H1	H1	H1	H1	H3	H3	-27.76923996760311	1.2275896826946553	-12.488880894932025	0.21901079900530088	37107153.3	11986278.738824222
sequential	FluB	FluB	FluB	H1	H1	H1	H1	H1	H1	H1	H1	H1	H1	H3	H3	H3	-27.78812958347454	0.21005259158438422	-11.502291042498095	0.10950626990193035	0.0	0.0
sequential	FluB	FluB	FluB	FluB	H1	H1	H1	H1	H1	H1	H1	H3	H3	H3	H3	H3	-27.841624521539977	0.1944758007471213	-10.746460789153346	0.15674240894489078	0.0	0.0
sequential	H1	H1	H1	H1	H1	H1	FluB	FluB	FluB	FluB	H3	H3	H3	H3	H3	H3	-27.845240734519322	0.9087862767071603	-10.939069961389155	0.22914414813270148	0.0	0.0
sequential	H3	H1	H1	H1	H1	H1	H1	H1	H1	H1	H1	H1	FluB	FluB	FluB	FluB	-27.916600861254743	1.9044752719039009	-13.691587221427346	0.20071288712053803	0.0	0.0
sequential	H1	H1	H1	H1	H3	H3	H3	H3	FluB	FluB	FluB	FluB	FluB	FluB	FluB	FluB	-27.944859964491137	2.860476239362574	-12.957273040494126	0.2520454745043088	0.0	0.0
sequential	H1	H1	H1	H1	H1	H3	H3	H3	FluB	FluB	FluB	FluB	FluB	FluB	FluB	FluB	-28.014047348000705	2.653240672737378	-12.897204541774459	0.26020694967641883	0.0	0.0
sequential	H1	H1	H1	H1	H1	H1	FluB	FluB	FluB	FluB	FluB	H3	H3	H3	H3	H3	-28.08762870983994	2.193689854492077	-11.243045313478438	0.2228786478781959	0.0	0.0
sequential	H1	H1	H3	H3	H3	H3	H3	H3	H3	H3	FluB	FluB	FluB	FluB	FluB	FluB	-28.35165382504812	1.1151885945443223	-12.294561703520806	0.2321043952560275	0.0	0.0
sequential	H1	H1	H1	H3	H3	H3	H3	H3	H3	FluB	FluB	FluB	FluB	FluB	FluB	FluB	-28.409743074652738	1.7321706579051572	-12.531080621433956	0.23851032771546335	0.0	0.0
sequential	H1	H1	H1	H1	H1	H1	H1	H1	H1	H1	H1	H1	H1	FluB	FluB	FluB	-28.432831913860277	1.2616180563735775	-13.281189892843715	0.2725596521527279	4026360.3	2899148.6480979226
sequential	H1	H1	H1	H1	H1	H1	H1	H1	H1	H1	H1	H1	H1	H1	FluB	H3	-28.500703948871603	1.3259368474664506	-12.997447668216749	0.2133639157801555	18946918.5	8767945.58525039
sequential	H1	H1	H1	H1	H1	H1	H1	FluB	FluB	FluB	FluB	FluB	FluB	FluB	FluB	H3	-28.505018142175278	1.47805809821299	-12.977190170940187	0.2077015929602728	0.0	0.0
sequential	H3	H1	H1	H1	H1	H1	H1	H1	H1	H1	H1	H1	H1	FluB	FluB	FluB	-28.510095394122644	1.5981000619836905	-13.655334257199648	0.19861343396003217	0.0	0.0
sequential	H1	H1	FluB	FluB	FluB	FluB	H3	H3	H3	H3	H3	H3	H3	H3	H3	H3	-28.522883646307356	0.4302630398782119	-10.940114386488005	0.21983652762335792	0.0	0.0
sequential	H1	H1	H1	H1	H1	H1	FluB	FluB	FluB	FluB	FluB	FluB	FluB	FluB	H3	H3	-28.640613954686653	1.6600099167588063	-12.635974996618689	0.21371411075548363	0.0	0.0
sequential	H3	H3	H1	H1	H1	H1	H1	H1	H1	H1	H1	H1	FluB	FluB	FluB	FluB	-28.643802865919625	0.5640340411338769	-13.283431917827645	0.123006919818991	0.0	0.0
sequential	H1	H3	H3	H3	H3	H3	H3	H3	H3	H3	H3	H3	H3	H3	H3	FluB	-28.76741753344865	0.49717018763326004	-10.823770191345547	0.21895463088624348	0.0	0.0
sequential	H1	H1	H1	H1	H1	H1	H1	H1	H1	H1	H1	FluB	FluB	FluB	FluB	FluB	-28.76972210808114	2.026148373279725	-13.374590876610926	0.2718639199503172	90184.8	90159.3996206472
sequential	FluB	FluB	FluB	FluB	H1	H1	H3	H3	H3	H3	H3	H3	H3	H3	H3	H3	-28.896339814327757	0.3184421455058505	-11.058101322028332	0.18044354681420835	0.0	0.0
sequential	FluB	FluB	FluB	FluB	H1	H1	H1	H1	H1	H1	H1	H1	H3	H3	H3	H3	-28.92921545703581	0.1938528577140385	-11.014061088562045	0.14122640834820746	0.0	0.0
sequential	H3	H1	H1	H1	H1	H1	H1	H1	H1	H1	H1	H1	H1	H1	FluB	FluB	-29.093432633580154	1.4393325466531652	-13.651997660279942	0.18688661757359754	0.0	0.0
sequential	H1	H3	H3	H3	H3	H3	H3	H3	H3	H3	H3	H3	H3	H3	H3	H3	-29.113956718880484	0.5176890690432288	-11.194104312966703	0.2076104068662876	0.0	0.0
sequential	H1	FluB	H3	H3	H3	H3	H3	H3	H3	H3	H3	H3	H3	H3	H3	H3	-29.113956718880484	0.5176890690432288	-11.194104312966703	0.2076104068662876	0.0	0.0
sequential	H1	FluB	FluB	FluB	H3	H3	H3	H3	H3	H3	H3	H3	H3	H3	H3	H3	-29.113956718880484	0.5176890690432288	-11.194104312966703	0.2076104068662876	0.0	0.0
sequential	H1	FluB	FluB	H3	H3	H3	H3	H3	H3	H3	H3	H3	H3	H3	H3	H3	-29.113956718880484	0.5176890690432288	-11.194104312966703	0.2076104068662876	0.0	0.0
sequential	H3	H3	H1	H1	H1	H1	H1	H1	H1	H1	H1	H1	H1	FluB	FluB	FluB	-29.197556968152824	0.4879776879616183	-13.237823394883506	0.12288799984759541	0.0	0.0
sequential	H1	H1	H1	H1	H1	H1	H1	H1	H3	FluB	FluB	FluB	FluB	FluB	FluB	FluB	-29.227183265130517	2.592800756672583	-13.013328850656492	0.26934551838054155	1454.7	4600.1653122469415
sequential	H1	H1	H1	H1	H1	H1	H1	H1	H1	H1	H1	H1	H1	H1	FluB	FluB	-29.385475748275866	1.0250491607735535	-13.273503811112707	0.27408093069357936	7048703.0	2987357.3416365096
sequential	FluB	H1	H3	H3	H3	H3	H3	H3	H3	H3	H3	H3	H3	H3	H3	H3	-29.50055257460211	0.38702801139783544	-11.691046048381441	0.19463746365852774	0.0	0.0
sequential	FluB	FluB	H1	H3	H3	H3	H3	H3	H3	H3	H3	H3	H3	H3	H3	H3	-29.533635917447125	0.39457475895243443	-11.48762212325306	0.1851545745290999	0.0	0.0
sequential	H3	H3	H1	H1	H1	H1	H1	H1	H1	H1	H1	H1	H1	H1	FluB	FluB	-29.545669656519557	0.31539107648120773	-13.22586392141246	0.10977909360656916	0.0	0.0
sequential	H1	H3	H3	H3	H3	H3	H3	H3	H3	H3	H3	FluB	FluB	FluB	FluB	FluB	-29.648456302543348	0.4513098440322539	-12.124187310988399	0.24542298622709474	0.0	0.0
sequential	H1	H1	H1	H1	H1	H1	H3	H3	FluB	FluB	FluB	FluB	FluB	FluB	FluB	FluB	-29.68999063295149	2.2743024806663774	-12.99044242413365	0.26605514157750715	0.0	0.0
sequential	FluB	FluB	FluB	H1	H1	H1	H1	H1	H1	H1	H1	H1	H1	H1	H3	H3	-29.84924347130382	0.21412673911203786	-12.168296286742713	0.09138345455353392	0.0	0.0
sequential	FluB	FluB	FluB	FluB	FluB	H1	H1	H1	H1	H3	H3	H3	H3	H3	H3	H3	-29.872173484595102	0.2543185412216087	-10.699701120372385	0.16916253381585342	0.0	0.0
sequential	H3	H1	H1	H1	H1	H1	H1	H1	H1	H1	H1	FluB	FluB	FluB	FluB	FluB	-29.88277145313579	1.6683184038861327	-13.753311114573405	0.19980118565464933	0.0	0.0
sequential	FluB	FluB	FluB	H1	H3	H3	H3	H3	H3	H3	H3	H3	H3	H3	H3	H3	-29.920600073895564	0.38458552508496896	-11.548413071540388	0.1749424122980044	0.0	0.0
sequential	H1	H1	H1	H1	H1	H1	H1	H1	H1	H1	FluB	FluB	FluB	FluB	FluB	FluB	-29.931047988994152	2.5405311275896048	-13.43380933897614	0.27025791297815793	7710.7	17242.36705875643
sequential	H1	H1	H1	H1	H1	H1	FluB	FluB	FluB	FluB	FluB	FluB	FluB	H3	H3	H3	-30.003840249467604	0.9324032955666153	-12.106903535686115	0.20913842336597574	0.0	0.0
sequential	H1	H1	H1	FluB	FluB	FluB	FluB	FluB	H3	H3	H3	H3	H3	H3	H3	H3	-30.019180342831127	0.49497717804007857	-10.799286102977357	0.23276123478537164	0.0	0.0
sequential	FluB	H1	H1	H1	H1	H1	H1	H1	H1	H1	H1	H1	H1	H1	H1	H3	-30.054585358688378	1.9445893360096946	-13.871983044241617	0.1659568522710422	0.0	0.0
sequential	H1	H1	H1	H1	FluB	FluB	FluB	FluB	FluB	H3	H3	H3	H3	H3	H3	H3	-30.096552031822842	0.6932013531077632	-10.869522828228524	0.22806014990692217	0.0	0.0
sequential	H3	H1	H1	H1	H1	H1	H1	H1	H1	H1	H1	H1	H1	H1	H1	FluB	-30.137974299006032	1.9800366159227338	-13.866464885654658	0.14986653779816872	0.0	0.0
sequential	FluB	FluB	FluB	FluB	FluB	H1	H1	H1	H1	H1	H3	H3	H3	H3	H3	H3	-30.182818184565164	0.23488354467555764	-10.699014769694262	0.16036420057615225	0.0	0.0
sequential	FluB	FluB	FluB	FluB	H1	H1	H1	H1	H1	H1	H1	H1	H1	H3	H3	H3	-30.298539717670852	0.19585235292762923	-11.412450024180067	0.11892420440973672	0.0	0.0
sequential	FluB	FluB	FluB	FluB	FluB	H1	H1	H1	H3	H3	H3	H3	H3	H3	H3	H3	-30.312650060166515	0.27149024601526683	-10.836203374577737	0.17331767167755954	0.0	0.0
sequential	FluB	FluB	H1	H1	H1	H1	H1	H1	H1	H1	H1	H1	H1	H1	H1	H3	-30.423356644923604	0.2378143642848885	-13.425453150944666	0.07438835059513868	0.0	0.0
sequential	H1	H1	H1	H1	H1	FluB	FluB	FluB	FluB	FluB	FluB	FluB	H3	H3	H3	H3	-30.443154741369543	0.9059759182223482	-11.69704594645145	0.2096445447520766	0.0	0.0
sequential	H3	H3	H3	H3	H3	H3	H3	H3	H3	H3	H3	H3	H3	FluB	FluB	H1	-30.594924765065468	1.1311055193361694	-11.848601868202106	0.17832994580254324	0.0	0.0
sequential	H3	H3	H1	H1	H1	H1	H1	H1	H1	H1	H1	H1	H1	H1	H1	FluB	-30.60626112204184	0.20045969728646099	-13.436444063118854	0.06603047157396073	0.0	0.0
sequential	H1	H1	H1	H1	H1	FluB	FluB	FluB	FluB	FluB	H3	H3	H3	H3	H3	H3	-30.732920922133875	0.7775194923174162	-11.008870455043477	0.22276501539819715	0.0	0.0
sequential	H1	FluB	FluB	FluB	FluB	H3	H3	H3	H3	H3	H3	H3	H3	H3	H3	H3	-30.774828219241627	0.3399899685863593	-11.199476231271257	0.20765331336280562	0.0	0.0
sequential	FluB	FluB	FluB	FluB	FluB	H1	H1	H1	H1	H1	H1	H3	H3	H3	H3	H3	-30.9414491026616	0.19885234640270308	-10.812719012379487	0.15008355825877728	0.0	0.0
sequential	H1	H1	FluB	FluB	FluB	FluB	FluB	H3	H3	H3	H3	H3	H3	H3	H3	H3	-31.014325008804523	0.48320843852082007	-10.98413230709186	0.21802681758534762	0.0	0.0
sequential	H3	H3	H1	H1	H1	H1	H1	H1	H1	H1	H1	FluB	FluB	FluB	FluB	FluB	-31.029365205001465	0.9063440886450134	-13.354049791259706	0.12383999014981693	0.0	0.0
sequential	H1	H1	H1	H1	H1	FluB	FluB	FluB	FluB	FluB	FluB	H3	H3	H3	H3	H3	-31.08821796042782	1.8366001579190592	-11.309298413279686	0.21666999008489127	0.0	0.0
sequential	H1	H1	H1	H1	H1	H1	H1	H1	H1	H1	H1	H1	H1	H1	H1	FluB	-31.103132979785364	1.1014559168430724	-13.485586868027275	0.252419503514535	13245834.1	4906223.176467877
sequential	H3	H1	H1	H1	H1	H1	H1	H1	H1	H1	FluB	FluB	FluB	FluB	FluB	FluB	-31.14899787521608	1.9317675324634458	-13.817029973410358	0.2000333574492603	0.0	0.0
sequential	H1	H1	H1	H1	H1	H1	H1	H1	H1	H1	H1	H1	H1	H1	H1	H3	-31.214385392348927	1.1227714787555014	-13.524724084105982	0.21367016057462718	20042878.5	6495316.323556575
sequential	H3	H3	H3	H3	H3	H3	H3	H3	H3	H3	H3	H3	H3	FluB	FluB	FluB	-31.266664331493722	0.5716291876072983	-12.186997019060772	0.14635024507199845	0.0	0.0
sequential	H3	H3	H3	H3	H3	H3	H3	H3	H3	H3	H3	H3	H3	H3	FluB	H1	-31.287135402781132	1.0061842954727067	-11.86160763443117	0.1433387819623137	0.0	0.0
sequential	H1	H1	H1	H3	H3	H3	H3	H3	FluB	FluB	FluB	FluB	FluB	FluB	FluB	FluB	-31.29566506896788	2.874999414465957	-13.084737255154007	0.23726713897290508	0.0	0.0
sequential	H3	H3	H3	H3	H3	H3	H3	H3	H3	H3	H3	H3	FluB	FluB	FluB	H1	-31.34905041616764	1.2661785684382	-12.367253684623444	0.1680292948503774	0.0	0.0
sequential	H1	H1	H1	H1	H1	H1	FluB	FluB	FluB	FluB	FluB	FluB	FluB	FluB	FluB	H3	-31.381908088825696	1.3677511496963362	-13.03450560196266	0.20710886866290432	0.0	0.0
sequential	H1	H1	H1	H1	H1	FluB	FluB	FluB	FluB	FluB	FluB	FluB	FluB	FluB	H3	H3	-31.430063346843312	1.7485036982153743	-12.694816719482402	0.20821956201723058	0.0	0.0
sequential	H3	H3	H3	H1	H1	H1	H1	H1	H1	H1	H1	H1	FluB	FluB	FluB	FluB	-31.431254763112165	0.5052128955271871	-13.138973555274841	0.11131180895168848	0.0	0.0
sequential	FluB	FluB	FluB	FluB	FluB	H1	H1	H3	H3	H3	H3	H3	H3	H3	H3	H3	-31.479644255319936	0.3067727192008763	-11.114999750636981	0.17504002536166485	0.0	0.0
sequential	FluB	FluB	FluB	FluB	H1	H3	H3	H3	H3	H3	H3	H3	H3	H3	H3	H3	-31.49005716997791	0.3599478727996918	-11.513917655156295	0.17493269896786146	0.0	0.0
sequential	H3	H3	H3	H3	H3	H3	H3	H3	H3	H3	H3	H3	FluB	FluB	FluB	FluB	-31.503537061474518	0.3700665431173932	-12.685153920365053	0.1440377400452399	0.0	0.0
sequential	H3	H3	H3	H1	H1	H1	H1	H1	H1	H1	H1	H1	H1	FluB	FluB	FluB	-31.5601340532415	0.5141516264260091	-13.08373887474409	0.1110230995201819	0.0	0.0
sequential	H3	H3	H3	H3	H3	H3	H3	H3	H3	H3	H3	H3	H3	H3	H1	FluB	-31.70109155991016	0.47207046646451517	-12.122008941198013	0.09200860591961689	0.0	0.0
sequential	H1	H1	H1	H1	H1	H1	H1	H1	H1	FluB	FluB	FluB	FluB	FluB	FluB	FluB	-31.74108394433911	2.577755435239569	-13.490973487117948	0.2687320615898495	1171.5	3704.6082788872563
sequential	H3	H3	H3	H3	H3	H3	H3	H3	H3	H3	H3	H3	H3	H1	FluB	FluB	-31.77660604832242	0.3715578399178471	-12.238511070822375	0.12110334225770401	0.0	0.0
sequential	H3	H3	H3	H1	H1	H1	H1	H1	H1	H1	H1	H1	H1	H1	FluB	FluB	-31.838685128601234	0.255172847450534	-13.068564603286418	0.10158922706485915	0.0	0.0
sequential	H1	H1	H1	H1	H1	H1	H1	H3	FluB	FluB	FluB	FluB	FluB	FluB	FluB	FluB	-31.86427036963652	1.9799958133913094	-13.221286350871434	0.2656022650889894	0.0	0.0
sequential	FluB	FluB	FluB	FluB	FluB	H1	H1	H1	H1	H1	H1	H1	H3	H3	H3	H3	-31.870876697594856	0.1821565393111694	-11.044818576460372	0.1343065542312636	0.0	0.0
sequential	H3	H3	H3	H3	H3	H3	H3	H3	H3	H3	H3	H3	H1	FluB	FluB	FluB	-32.010295896887996	0.35248023374733184	-12.62646195040141	0.14407651577854647	0.0	0.0
sequential	H3	H3	H3	H3	H3	H3	H3	H3	H3	H3	H3	H1	FluB	FluB	FluB	FluB	-32.11298898684042	0.3104345698462074	-13.079316677151741	0.12899566315904118	0.0	0.0
sequential	FluB	FluB	FluB	FluB	H1	H1	H1	H1	H1	H1	H1	H1	H1	H1	H3	H3	-32.18652467468127	0.15924535111541008	-12.068689205839869	0.09935692015863462	0.0	0.0
sequential	H3	H1	H1	H1	H1	H1	H1	H1	H1	FluB	FluB	FluB	FluB	FluB	FluB	FluB	-32.22222352390757	2.603259892236395	-13.883185582552017	0.19637993488219233	0.0	0.0
sequential	FluB	FluB	FluB	H3	H3	H3	H3	H3	H3	H3	H3	H3	H3	H3	H3	H1	-32.24584044993969	0.9844325364271597	-12.403688831009825	0.09592143981210832	0.0	0.0
sequential	FluB	FluB	FluB	FluB	H3	H3	H3	H3	H3	H3	H3	H3	H3	H3	H3	H1	-32.24584044993969	0.9844325364271597	-12.403688831009825	0.09592143981210832	0.0	0.0
sequential	FluB	H3	H3	H3	H3	H3	H3	H3	H3	H3	H3	H3	H3	H3	H3	H1	-32.24584044993969	0.9844325364271597	-12.403688831009825	0.09592143981210832	0.0	0.0
sequential	H3	H3	H3	H3	H3	H3	H3	H3	H3	H3	H3	H3	H3	H3	H3	H1	-32.24584044993969	0.9844325364271597	-12.403688831009825	0.09592143981210832	0.0	0.0
sequential	FluB	FluB	H3	H3	H3	H3	H3	H3	H3	H3	H3	H3	H3	H3	H3	H1	-32.24584044993969	0.9844325364271597	-12.403688831009825	0.09592143981210832	0.0	0.0
sequential	H1	H1	H3	H3	H3	H3	H3	H3	H3	FluB	FluB	FluB	FluB	FluB	FluB	FluB	-32.4858109724428	1.9774925178895706	-12.864660554207168	0.2259222002872701	0.0	0.0
sequential	FluB	FluB	FluB	H1	H1	H1	H1	H1	H1	H1	H1	H1	H1	H1	H1	H3	-32.54328483401224	0.19187049874151493	-13.238850425226099	0.0532902220176407	0.0	0.0
sequential	H3	H3	H3	H3	H3	H3	H3	H3	H3	H3	H3	H3	H3	H1	H1	FluB	-32.70079960785695	0.4978416194505827	-12.471667280693419	0.08179292265836167	0.0	0.0
sequential	H1	H1	H1	H1	H3	H3	H3	FluB	FluB	FluB	FluB	FluB	FluB	FluB	FluB	FluB	-32.70670007579516	2.789591841513749	-13.397609109020298	0.25202060318632774	0.0	0.0
sequential	H3	H3	H3	H1	H1	H1	H1	H1	H1	H1	H1	H1	H1	H1	H1	FluB	-32.73701493528758	0.2033878257453209	-13.280936392545195	0.06202700813548244	0.0	0.0
sequential	H3	H3	H3	H3	H3	H3	H3	H3	H3	H3	H3	H3	H3	FluB	H1	H1	-32.73739461464924	0.7998271038934008	-12.63088958889443	0.11604598667429822	0.0	0.0
sequential	H3	H3	H3	H3	H3	H3	H3	H3	H3	H3	H3	FluB	FluB	FluB	FluB	H1	-32.75800427300673	1.8762993884368429	-12.963467994995883	0.16214136199698032	0.0	0.0
sequential	H1	H1	H1	H1	H1	H3	H3	FluB	FluB	FluB	FluB	FluB	FluB	FluB	FluB	FluB	-32.760487765149385	2.5578470454835984	-13.348949312314314	0.25883108876533856	0.0	0.0
sequential	H1	H1	H1	H1	H1	FluB	FluB	FluB	FluB	FluB	FluB	FluB	FluB	H3	H3	H3	-32.822332190315834	0.8697981365937427	-12.166995593477045	0.20301224441721102	0.0	0.0
sequential	H3	H3	H3	H3	H3	H3	H3	H3	H3	H3	H3	H3	H1	H1	FluB	FluB	-32.86384595617585	0.23668056529116616	-12.66964244140632	0.12349578528385985	0.0	0.0
sequential	H3	H3	H1	H1	H1	H1	H1	H1	H1	H1	FluB	FluB	FluB	FluB	FluB	FluB	-32.87376535060566	2.0123263386642267	-13.43101592744978	0.12401578017382445	0.0	0.0
sequential	H3	H3	H3	H3	H3	H3	H3	H3	H3	H3	H3	H3	H3	H3	FluB	FluB	-32.874165359063944	0.7331105871439233	-11.940307016411793	0.12738651945530735	0.0	0.0
sequential	H1	FluB	FluB	FluB	FluB	FluB	H3	H3	H3	H3	H3	H3	H3	H3	H3	H3	-33.00969632317307	0.3169863690204129	-11.214773393675356	0.20744148160845324	0.0	0.0
sequential	H1	H3	H3	H3	H3	H3	H3	H3	H3	H3	FluB	FluB	FluB	FluB	FluB	FluB	-33.00978932493605	1.0946191541782386	-12.724888760245225	0.24581477206260002	0.0	0.0
sequential	FluB	FluB	FluB	FluB	FluB	H1	H1	H1	H1	H1	H1	H1	H1	H3	H3	H3	-33.107154654298554	0.18736917171641915	-11.416886664413061	0.11115975220267718	0.0	0.0
sequential	H3	H3	H3	H3	H3	H3	H3	H3	H3	H3	H3	H1	H1	FluB	FluB	FluB	-33.22614134655996	0.41854262449893676	-13.010415319211601	0.12727357259368083	0.0	0.0
sequential	FluB	FluB	FluB	FluB	H3	H3	H3	H3	H3	H3	H3	H3	H3	H3	H1	H1	-33.29164500919697	0.88535523112455	-12.926428372239586	0.1266823039895451	0.0	0.0
sequential	H3	H3	H3	H3	H3	H3	H3	H3	H3	H3	H3	H3	H3	H3	H1	H1	-33.29164500919697	0.88535523112455	-12.926428372239586	0.1266823039895451	0.0	0.0
sequential	FluB	H3	H3	H3	H3	H3	H3	H3	H3	H3	H3	H3	H3	H3	H1	H1	-33.29164500919697	0.88535523112455	-12.926428372239586	0.1266823039895451	0.0	0.0
sequential	FluB	FluB	FluB	H3	H3	H3	H3	H3	H3	H3	H3	H3	H3	H3	H1	H1	-33.29164500919697	0.88535523112455	-12.926428372239586	0.1266823039895451	0.0	0.0
sequential	FluB	FluB	H3	H3	H3	H3	H3	H3	H3	H3	H3	H3	H3	H3	H1	H1	-33.29164500919697	0.88535523112455	-12.926428372239586	0.1266823039895451	0.0	0.0
sequential	H3	H3	H3	H3	H3	H3	H3	H3	H3	H3	H3	H3	FluB	FluB	H1	H1	-33.41304331008577	1.0917376230560434	-12.983829938147943	0.1102532453449176	0.0	0.0
sequential	H1	H1	H1	FluB	FluB	FluB	FluB	FluB	FluB	H3	H3	H3	H3	H3	H3	H3	-33.48894612819976	0.498717769354733	-10.945901896388653	0.22745050636486377	0.0	0.0
sequential	H3	H3	H3	H3	H3	H3	H3	H3	H3	H3	H3	H3	H1	H1	H1	FluB	-33.50234470308615	0.6842197780596048	-12.889279428210143	0.07840293947767615	0.0	0.0
sequential	H3	H3	H3	H3	H3	H3	H3	H3	H3	H3	H1	H1	FluB	FluB	FluB	FluB	-33.55977907399527	0.39517236793432237	-13.437542960993508	0.12218104492835116	0.0	0.0
sequential	H3	H3	H3	H1	H1	H1	H1	H1	H1	H1	H1	FluB	FluB	FluB	FluB	FluB	-33.62819966851859	0.8761905423411076	-13.224952309997827	0.11232936730931364	0.0	0.0
mixed_random	random	random	random	random	random	random	random	random	random	random	random	random	random	random	random	random	-33.674253188241956	0.3522548181820052	-11.983194449082506	0.06129510115085266	11078.881	143187.42486889672
sequential	FluB	FluB	FluB	FluB	FluB	H1	H3	H3	H3	H3	H3	H3	H3	H3	H3	H3	-33.71445189411741	0.3272031800601462	-11.551864009733118	0.17525070183354155	0.0	0.0
sequential	FluB	FluB	FluB	FluB	FluB	FluB	H1	H1	H1	H1	H3	H3	H3	H3	H3	H3	-33.720175861891896	0.23431749007969324	-10.850548665068718	0.15689448387294158	0.0	0.0
sequential	FluB	FluB	FluB	FluB	FluB	FluB	H1	H1	H1	H3	H3	H3	H3	H3	H3	H3	-33.72773059210024	0.25623723949595384	-10.936025562581776	0.165031241961782	0.0	0.0
sequential	H3	H1	H1	H1	H1	H1	H1	H1	H1	H1	H1	H1	H1	H1	H1	H1	-33.77405378234895	1.7655426535413805	-15.268743889791425	0.1487281998546244	0.0	0.0
sequential	FluB	H1	H1	H1	H1	H1	H1	H1	H1	H1	H1	H1	H1	H1	H1	H1	-33.77405378234895	1.7655426535413805	-15.268743889791425	0.1487281998546244	0.0	0.0
sequential	H1	H1	H1	H1	FluB	FluB	FluB	FluB	FluB	FluB	FluB	FluB	H3	H3	H3	H3	-33.82574411968449	0.8111846411566666	-11.76877449440059	0.20891149526358618	0.0	0.0
sequential	FluB	FluB	H1	H1	H1	H1	H1	H1	H1	H1	H1	H1	H1	H1	H1	H1	-33.85692378773381	0.9961918738300923	-14.85148080331675	0.08915117748115813	0.0	0.0
sequential	FluB	H3	H1	H1	H1	H1	H1	H1	H1	H1	H1	H1	H1	H1	H1	H1	-33.85692378773381	0.9961918738300923	-14.85148080331675	0.08915117748115813	0.0	0.0
sequential	H3	H3	H1	H1	H1	H1	H1	H1	H1	H1	H1	H1	H1	H1	H1	H1	-33.85692378773381	0.9961918738300923	-14.85148080331675	0.08915117748115813	0.0	0.0
sequential	H3	FluB	H1	H1	H1	H1	H1	H1	H1	H1	H1	H1	H1	H1	H1	H1	-33.85692378773381	0.9961918738300923	-14.85148080331675	0.08915117748115813	0.0	0.0
sequential	H1	H1	H1	H1	FluB	FluB	FluB	FluB	FluB	FluB	H3	H3	H3	H3	H3	H3	-33.890465220127545	0.6968436914303975	-11.091100914606647	0.22217146838471805	0.0	0.0
sequential	H1	H1	FluB	FluB	FluB	FluB	FluB	FluB	H3	H3	H3	H3	H3	H3	H3	H3	-34.0981637967372	0.45898697022181834	-11.06744018536266	0.21586043885343745	0.0	0.0
sequential	H3	H3	H3	H3	H3	H3	H3	H3	H3	H3	H3	H1	H1	H1	FluB	FluB	-34.15319102305659	0.43533742116289265	-12.99123105579734	0.1111093722515024	0.0	0.0
sequential	H3	H3	H3	H3	H1	H1	H1	H1	H1	H1	H1	H1	H1	FluB	FluB	FluB	-34.178890900311174	0.3928238386876331	-13.03371877967099	0.11296785157667828	0.0	0.0
sequential	FluB	FluB	FluB	FluB	FluB	FluB	H1	H1	H1	H1	H1	H3	H3	H3	H3	H3	-34.21053231553945	0.20348590084299217	-10.901146218691306	0.14686652992547652	0.0	0.0
sequential	H3	H1	H1	H1	H1	H1	H1	H1	FluB	FluB	FluB	FluB	FluB	FluB	FluB	FluB	-34.248809961555395	2.950960670794624	-13.950992668548354	0.1938803348603693	0.0	0.0
sequential	H1	H1	H1	H1	H1	H1	H1	H1	FluB	FluB	FluB	FluB	FluB	FluB	FluB	FluB	-34.294190930579305	2.15163172946843	-13.545145228887383	0.26571596400367625	0.0	0.0
sequential	H3	H3	H3	H3	H1	H1	H1	H1	H1	H1	H1	H1	H1	H1	FluB	FluB	-34.32034501797048	0.22721413407495886	-13.009537957917084	0.1003093975838243	0.0	0.0
sequential	H1	H1	H1	H1	H1	FluB	FluB	FluB	FluB	FluB	FluB	FluB	FluB	FluB	FluB	H3	-34.34999315918014	1.182355847656282	-13.097586827932695	0.20095475679311658	0.0	0.0
sequential	H3	H3	H3	H3	H3	H3	H3	H3	H3	H3	H3	H3	H3	H3	H3	FluB	-34.40446288562297	0.3657635904452453	-11.852605179101614	0.09444173603752173	0.0	0.0
sequential	FluB	FluB	FluB	FluB	FluB	H3	H3	H3	H3	H3	H3	H3	H3	H3	H3	H1	-34.47838428128184	0.9686988230976374	-12.413101806159009	0.09579472278294916	0.0	0.0
sequential	H3	H3	H3	H3	H3	H3	H3	H3	H3	H3	H3	FluB	FluB	FluB	H1	H1	-34.50609003932169	1.3062265897917134	-13.495628346223478	0.10146534968578265	0.0	0.0
sequential	H1	H1	H1	H1	FluB	FluB	FluB	FluB	FluB	FluB	FluB	H3	H3	H3	H3	H3	-34.53238873690576	1.6449465667514456	-11.386272800289941	0.2160601846399993	0.0	0.0
sequential	H3	H3	H3	H3	H1	H1	H1	H1	H1	H1	H1	H1	FluB	FluB	FluB	FluB	-34.58885605092852	0.47128343589281346	-13.10266843328092	0.11334741629982058	0.0	0.0
sequential	FluB	FluB	FluB	FluB	FluB	FluB	H1	H1	H3	H3	H3	H3	H3	H3	H3	H3	-34.60444785834896	0.27148749978896675	-11.18465528728601	0.1689269706762447	0.0	0.0
sequential	FluB	FluB	FluB	FluB	H1	H1	H1	H1	H1	H1	H1	H1	H1	H1	H1	H3	-34.661478219619895	0.26167795143121403	-13.146974847489508	0.06103968511727634	0.0	0.0
sequential	FluB	FluB	H3	H3	H3	H3	H3	H3	H3	H3	H3	H3	H3	H3	H3	H3	-34.75125104418501	0.40288735800795233	-12.193441458204585	0.17245335183425617	0.0	0.0
sequential	FluB	FluB	FluB	FluB	H3	H3	H3	H3	H3	H3	H3	H3	H3	H3	H3	H3	-34.75125104418501	0.40288735800795233	-12.193441458204585	0.17245335183425617	0.0	0.0
sequential	FluB	FluB	FluB	H3	H3	H3	H3	H3	H3	H3	H3	H3	H3	H3	H3	H3	-34.75125104418501	0.40288735800795233	-12.193441458204585	0.17245335183425617	0.0	0.0
sequential	FluB	H3	H3	H3	H3	H3	H3	H3	H3	H3	H3	H3	H3	H3	H3	H3	-34.75125104418501	0.40288735800795233	-12.193441458204585	0.17245335183425617	0.0	0.0
H3_only	H3	H3	H3	H3	H3	H3	H3	H3	H3	H3	H3	H3	H3	H3	H3	H3	-34.75125104418501	0.40288735800795233	-12.193441458204585	0.17245335183425617	0.0	0.0
sequential	H1	H1	H1	H1	H1	H1	H3	FluB	FluB	FluB	FluB	FluB	FluB	FluB	FluB	FluB	-34.783166514083256	2.065942943640861	-13.424812323099303	0.2637614489226249	0.0	0.0
sequential	H1	H1	H1	H1	FluB	FluB	FluB	FluB	FluB	FluB	FluB	FluB	FluB	FluB	H3	H3	-34.81441832328725	1.6905855888986028	-12.76311440116046	0.20655662996608243	0.0	0.0
sequential	H3	H3	H3	H3	H3	H3	H3	H3	H3	H3	H1	H1	H1	FluB	FluB	FluB	-34.81691588440587	0.6102956309818989	-13.307340131749049	0.11695521668056762	0.0	0.0
sequential	H3	H3	H3	H3	H1	H1	H1	H1	H1	H1	H1	H1	H1	H1	H1	FluB	-34.85178716446724	0.2324397101440662	-13.210529352015763	0.05865563415958977	0.0	0.0
sequential	FluB	FluB	FluB	FluB	FluB	H1	H1	H1	H1	H1	H1	H1	H1	H1	H3	H3	-34.886726227954206	0.16432273942318254	-12.055393058553978	0.0913136922430594	0.0	0.0
sequential	FluB	FluB	FluB	FluB	FluB	FluB	H1	H1	H1	H1	H1	H1	H3	H3	H3	H3	-35.00048758122873	0.19342527602820478	-11.087529495199554	0.1315019468260074	0.0	0.0
sequential	H3	H3	H1	H1	H1	H1	H1	H1	H1	FluB	FluB	FluB	FluB	FluB	FluB	FluB	-35.09246763606887	1.8743601123688465	-13.515511398917313	0.12144957923273866	0.0	0.0
sequential	H1	H1	H3	H3	H3	H3	H3	H3	FluB	FluB	FluB	FluB	FluB	FluB	FluB	FluB	-35.21925519510233	2.988812293963343	-13.395673987856798	0.2241079092927847	0.0	0.0
sequential	H3	H3	H3	H3	H3	H3	H3	H3	H3	H3	H3	FluB	FluB	FluB	FluB	FluB	-35.253403718097815	0.36164298743699963	-13.2188842752307	0.134049330881221	0.0	0.0
sequential	H3	H3	H3	H3	H3	H3	H3	H3	H3	H3	FluB	FluB	FluB	FluB	FluB	H1	-35.27255369942335	1.0863486388878114	-13.651984899240036	0.14792150912501836	0.0	0.0
sequential	FluB	FluB	FluB	FluB	H3	H3	H3	H3	H3	H3	H3	H3	H3	H1	H1	H1	-35.370553588250836	0.8685410547800712	-13.42252888943531	0.1151272180548098	0.0	0.0
sequential	FluB	FluB	FluB	H3	H3	H3	H3	H3	H3	H3	H3	H3	H3	H1	H1	H1	-35.370553588250836	0.8685410547800712	-13.42252888943531	0.1151272180548098	0.0	0.0
sequential	H3	H3	H3	H3	H3	H3	H3	H3	H3	H3	H3	H3	H3	H1	H1	H1	-35.370553588250836	0.8685410547800712	-13.42252888943531	0.1151272180548098	0.0	0.0
sequential	FluB	FluB	H3	H3	H3	H3	H3	H3	H3	H3	H3	H3	H3	H1	H1	H1	-35.370553588250836	0.8685410547800712	-13.42252888943531	0.1151272180548098	0.0	0.0
sequential	FluB	H3	H3	H3	H3	H3	H3	H3	H3	H3	H3	H3	H3	H1	H1	H1	-35.370553588250836	0.8685410547800712	-13.42252888943531	0.1151272180548098	0.0	0.0
sequential	H1	FluB	FluB	FluB	FluB	FluB	FluB	H3	H3	H3	H3	H3	H3	H3	H3	H3	-35.44094563044446	0.3457733500498974	-11.24873325938725	0.20626574139853232	0.0	0.0
H1_only	H1	H1	H1	H1	H1	H1	H1	H1	H1	H1	H1	H1	H1	H1	H1	H1	-35.47516218646799	1.225842700314139	-14.900630952735805	0.2739444661102048	9583148.1	8661921.658719366
sequential	H3	H3	H3	H3	H3	H3	H3	H3	H3	H3	FluB	FluB	FluB	FluB	H1	H1	-35.52940120330939	1.627465462878165	-14.14270892886178	0.1007912089255834	0.0	0.0
sequential	H3	H3	H3	H3	H3	H3	H3	H3	H3	H3	H1	FluB	FluB	FluB	FluB	FluB	-35.806780500950765	0.8353510831432253	-13.634335008374132	0.12775613961793447	0.0	0.0
sequential	FluB	FluB	FluB	FluB	FluB	H3	H3	H3	H3	H3	H3	H3	H3	H3	H1	H1	-35.80889675418683	0.7831111662325645	-12.940173142892764	0.12635667852446833	0.0	0.0
sequential	H3	H3	H3	H1	H1	H1	H1	H1	H1	H1	FluB	FluB	FluB	FluB	FluB	FluB	-35.86303942990965	1.5792017936106129	-13.325022838284745	0.11187470260424943	0.0	0.0
sequential	FluB	FluB	FluB	H1	H1	H1	H1	H1	H1	H1	H1	H1	H1	H1	H1	H1	-35.999044782794904	0.7761632598781792	-14.693635045758827	0.11152954832084445	0.0	0.0
sequential	H3	FluB	FluB	H1	H1	H1	H1	H1	H1	H1	H1	H1	H1	H1	H1	H1	-35.999044782794904	0.7761632598781792	-14.693635045758827	0.11152954832084445	0.0	0.0
sequential	FluB	FluB	H3	H1	H1	H1	H1	H1	H1	H1	H1	H1	H1	H1	H1	H1	-35.999044782794904	0.7761632598781792	-14.693635045758827	0.11152954832084445	0.0	0.0
sequential	H3	H3	FluB	H1	H1	H1	H1	H1	H1	H1	H1	H1	H1	H1	H1	H1	-35.999044782794904	0.7761632598781792	-14.693635045758827	0.11152954832084445	0.0	0.0
sequential	FluB	H3	H3	H1	H1	H1	H1	H1	H1	H1	H1	H1	H1	H1	H1	H1	-35.999044782794904	0.7761632598781792	-14.693635045758827	0.11152954832084445	0.0	0.0
sequential	H3	H3	H3	H1	H1	H1	H1	H1	H1	H1	H1	H1	H1	H1	H1	H1	-35.999044782794904	0.7761632598781792	-14.693635045758827	0.11152954832084445	0.0	0.0
sequential	FluB	FluB	FluB	FluB	FluB	FluB	H1	H1	H1	H1	H1	H1	H1	H3	H3	H3	-36.107245096489514	0.20125559304274407	-11.429803002363238	0.10797651432480994	0.0	0.0
sequential	H1	H1	H1	H3	H3	H3	H3	FluB	FluB	FluB	FluB	FluB	FluB	FluB	FluB	FluB	-36.110078858079255	2.8210886805241815	-13.503067126297188	0.2384125350710953	0.0	0.0
sequential	FluB	FluB	FluB	FluB	FluB	FluB	H1	H3	H3	H3	H3	H3	H3	H3	H3	H3	-36.20073949411039	0.30532145859337473	-11.60350529363151	0.17031397016385297	0.0	0.0
sequential	H1	H1	H1	H1	FluB	FluB	FluB	FluB	FluB	FluB	FluB	FluB	FluB	H3	H3	H3	-36.222086508365784	0.8082740511107047	-12.235112282427794	0.2019776189545949	0.0	0.0
sequential	FluB	FluB	FluB	FluB	FluB	H3	H3	H3	H3	H3	H3	H3	H3	H3	H3	H3	-36.27942151278159	0.3873302995895273	-12.197497291266554	0.17218921156822192	0.0	0.0
sequential	H3	H3	H3	H3	H3	H3	H3	H3	H3	H3	H3	H1	H1	H1	H1	FluB	-36.356490817815455	0.5728044424010185	-13.190839860372748	0.0680260262927286	0.0	0.0
sequential	H3	H3	H3	H3	H3	H3	H3	H3	H3	H3	H1	H1	H1	H1	FluB	FluB	-36.40391145418869	0.6071544316389634	-13.23946569424102	0.10252118291421085	0.0	0.0
sequential	H3	H3	H3	H3	H3	H3	H3	H3	H3	H3	H3	H3	FluB	H1	H1	H1	-36.66254459458388	0.974857678055105	-13.498330843986311	0.1166555985278954	0.0	0.0
sequential	FluB	FluB	FluB	FluB	H3	H3	H3	H3	H3	H3	H3	H3	H1	H1	H1	H1	-36.68430617588868	0.927554482032741	-13.967213175265384	0.10568818628676342	0.0	0.0
sequential	FluB	FluB	FluB	H3	H3	H3	H3	H3	H3	H3	H3	H3	H1	H1	H1	H1	-36.68430617588868	0.927554482032741	-13.967213175265384	0.10568818628676342	0.0	0.0
sequential	FluB	FluB	H3	H3	H3	H3	H3	H3	H3	H3	H3	H3	H1	H1	H1	H1	-36.68430617588868	0.927554482032741	-13.967213175265384	0.10568818628676342	0.0	0.0
sequential	H3	H3	H3	H3	H3	H3	H3	H3	H3	H3	H3	H3	H1	H1	H1	H1	-36.68430617588868	0.927554482032741	-13.967213175265384	0.10568818628676342	0.0	0.0
sequential	FluB	H3	H3	H3	H3	H3	H3	H3	H3	H3	H3	H3	H1	H1	H1	H1	-36.68430617588868	0.927554482032741	-13.967213175265384	0.10568818628676342	0.0	0.0
sequential	H3	H3	H3	H3	H1	H1	H1	H1	H1	H1	H1	FluB	FluB	FluB	FluB	FluB	-36.73597715167963	0.9771555302239134	-13.20582973525745	0.1145561764547451	0.0	0.0
sequential	H3	H3	H3	H3	H3	H3	H3	H3	H3	H1	H1	H1	FluB	FluB	FluB	FluB	-36.827699155494415	0.4843323801785564	-13.53054117702385	0.11187200290001044	0.0	0.0
sequential	H1	H1	H1	H1	H1	H1	H1	FluB	FluB	FluB	FluB	FluB	FluB	FluB	FluB	FluB	-36.9132829056332	1.9579294616189868	-13.599363260135057	0.26372558544169744	0.0	0.0
sequential	H3	H3	H3	H3	H3	H1	H1	H1	H1	H1	H1	H1	H1	FluB	FluB	FluB	-37.11791896060163	0.37251976065660186	-13.065218646201275	0.10895043226874883	0.0	0.0
sequential	H1	H3	H3	H3	H3	H3	H3	H3	H3	FluB	FluB	FluB	FluB	FluB	FluB	FluB	-37.132300970363715	1.991379873296322	-13.276750415621878	0.2383251018596086	0.0	0.0
sequential	H3	H3	H3	H3	H3	H1	H1	H1	H1	H1	H1	H1	H1	H1	FluB	FluB	-37.13932736104983	0.2546153631885003	-13.029801637375224	0.09742997404303162	0.0	0.0
sequential	H1	H1	H1	FluB	FluB	FluB	FluB	FluB	FluB	FluB	FluB	FluB	H3	H3	H3	H3	-37.25200105520347	0.6305539966920939	-11.824491885508262	0.2056319196240885	0.0	0.0
sequential	H1	H1	H1	FluB	FluB	FluB	FluB	FluB	FluB	FluB	H3	H3	H3	H3	H3	H3	-37.25792127553187	0.5033734363799939	-11.16070231279421	0.2207066725364633	0.0	0.0
sequential	FluB	FluB	FluB	FluB	FluB	FluB	H3	H3	H3	H3	H3	H3	H3	H3	H3	H1	-37.26362381644129	0.993542918402503	-12.442916197164125	0.09567797252314685	0.0	0.0
sequential	H3	H1	H1	H1	H1	H1	H1	FluB	FluB	FluB	FluB	FluB	FluB	FluB	FluB	FluB	-37.2739515976184	2.977458404535219	-14.02484639150357	0.19052168442830728	0.0	0.0
sequential	H3	H3	H3	H3	H3	H3	H3	H3	H3	H3	H3	FluB	FluB	H1	H1	H1	-37.31801281021118	0.983424033217039	-13.919108273953743	0.1191927042785086	0.0	0.0
sequential	FluB	FluB	FluB	FluB	FluB	H1	H1	H1	H1	H1	H1	H1	H1	H1	H1	H3	-37.31975127236075	0.2365946927780235	-13.138092208072907	0.05082916146087158	0.0	0.0
sequential	H3	H3	H1	H1	H1	H1	H1	H1	FluB	FluB	FluB	FluB	FluB	FluB	FluB	FluB	-37.39345574158068	2.5135450741571566	-13.609838178216284	0.12003948586475173	0.0	0.0
sequential	H3	H3	H3	H3	H3	H1	H1	H1	H1	H1	H1	H1	H1	H1	H1	FluB	-37.48623335871967	0.21261049164675694	-13.219224669917136	0.05438533589340501	0.0	0.0
sequential	H1	H1	FluB	FluB	FluB	FluB	FluB	FluB	FluB	H3	H3	H3	H3	H3	H3	H3	-37.53119464208298	0.4415911307949491	-11.204741546262905	0.2107852384934916	0.0	0.0
sequential	FluB	FluB	FluB	FluB	FluB	FluB	FluB	H1	H1	H1	H3	H3	H3	H3	H3	H3	-37.60311876112364	0.2353482227099784	-11.079963858896782	0.15447301079563458	0.0	0.0
sequential	FluB	FluB	FluB	FluB	FluB	FluB	FluB	H1	H1	H1	H1	H3	H3	H3	H3	H3	-37.7835758185904	0.19792011924711087	-11.043858648009193	0.14516196562168088	0.0	0.0
sequential	H1	H1	H1	H1	FluB	FluB	FluB	FluB	FluB	FluB	FluB	FluB	FluB	FluB	FluB	H3	-37.79072684946568	0.8646467335183485	-13.175609528941687	0.19901353386547127	0.0	0.0
sequential	FluB	FluB	FluB	FluB	FluB	H3	H3	H3	H3	H3	H3	H3	H3	H1	H1	H1	-37.79963513172258	0.9456141361938858	-13.440388218064681	0.11514553965401671	0.0	0.0
sequential	FluB	FluB	FluB	FluB	FluB	FluB	H1	H1	H1	H1	H1	H1	H1	H1	H3	H3	-37.79963844111671	0.16304642379289827	-12.04970729368078	0.0876271665184733	0.0	0.0
sequential	H3	H3	H3	H3	H3	H1	H1	H1	H1	H1	H1	H1	FluB	FluB	FluB	FluB	-37.80125995071445	0.4725039305336009	-13.152564351511991	0.10957553191723965	0.0	0.0
sequential	H1	H1	H1	H1	H3	H3	FluB	FluB	FluB	FluB	FluB	FluB	FluB	FluB	FluB	FluB	-37.93555386322803	2.6205546754638664	-13.668241780348122	0.2511738961823949	0.0	0.0
sequential	FluB	FluB	FluB	FluB	H1	H1	H1	H1	H1	H1	H1	H1	H1	H1	H1	H1	-38.00144683545256	0.767314089294197	-14.63723560633102	0.10213403717313374	0.0	0.0
sequential	H3	H3	H3	H3	H1	H1	H1	H1	H1	H1	H1	H1	H1	H1	H1	H1	-38.00144683545256	0.767314089294197	-14.63723560633102	0.10213403717313374	0.0	0.0
sequential	FluB	FluB	H3	H3	H1	H1	H1	H1	H1	H1	H1	H1	H1	H1	H1	H1	-38.00144683545256	0.767314089294197	-14.63723560633102	0.10213403717313374	0.0	0.0
sequential	H3	H3	FluB	FluB	H1	H1	H1	H1	H1	H1	H1	H1	H1	H1	H1	H1	-38.00144683545256	0.767314089294197	-14.63723560633102	0.10213403717313374	0.0	0.0
sequential	H3	H3	H3	FluB	H1	H1	H1	H1	H1	H1	H1	H1	H1	H1	H1	H1	-38.00144683545256	0.767314089294197	-14.63723560633102	0.10213403717313374	0.0	0.0
sequential	FluB	H3	H3	H3	H1	H1	H1	H1	H1	H1	H1	H1	H1	H1	H1	H1	-38.00144683545256	0.767314089294197	-14.63723560633102	0.10213403717313374	0.0	0.0
sequential	H3	FluB	FluB	FluB	H1	H1	H1	H1	H1	H1	H1	H1	H1	H1	H1	H1	-38.00144683545256	0.767314089294197	-14.63723560633102	0.10213403717313374	0.0	0.0
sequential	FluB	FluB	FluB	H3	H1	H1	H1	H1	H1	H1	H1	H1	H1	H1	H1	H1	-38.00144683545256	0.767314089294197	-14.63723560633102	0.10213403717313374	0.0	0.0
sequential	FluB	FluB	FluB	FluB	FluB	FluB	FluB	H1	H1	H3	H3	H3	H3	H3	H3	H3	-38.01797235504771	0.24940819714216003	-11.28346273365038	0.16170476069926007	0.0	0.0
sequential	H1	H1	H1	FluB	FluB	FluB	FluB	FluB	FluB	FluB	FluB	H3	H3	H3	H3	H3	-38.07019315166251	1.291251606247469	-11.448989962034117	0.21364593162631576	0.0	0.0
sequential	H1	H1	H1	H1	H1	H3	FluB	FluB	FluB	FluB	FluB	FluB	FluB	FluB	FluB	FluB	-38.11228202049568	2.3629098374981736	-13.621839709834045	0.2568498043916407	0.0	0.0
sequential	H3	H3	H3	H3	H3	H3	H3	H3	H3	H1	H1	H1	H1	FluB	FluB	FluB	-38.13432105710585	0.35604014377859083	-13.360445118558554	0.10929522296598347	0.0	0.0
sequential	H3	H3	H3	H1	H1	H1	H1	H1	H1	FluB	FluB	FluB	FluB	FluB	FluB	FluB	-38.140236957308375	2.009763691837989	-13.440811706584336	0.11022597580639047	0.0	0.0
sequential	H1	H1	H1	FluB	FluB	FluB	FluB	FluB	FluB	FluB	FluB	FluB	FluB	FluB	H3	H3	-38.311423193693734	1.4712474837905254	-12.814444442068458	0.20287761501682153	0.0	0.0
sequential	FluB	FluB	FluB	FluB	FluB	FluB	FluB	H1	H1	H1	H1	H1	H3	H3	H3	H3	-38.330028727058846	0.18005103987420185	-11.1681085715051	0.13017037102078086	0.0	0.0
sequential	H3	H3	H3	H3	H3	H3	H3	H3	H3	H3	FluB	FluB	FluB	H1	H1	H1	-38.36636875262481	1.0271674244926585	-14.53417172253112	0.11211662728371898	0.0	0.0
sequential	FluB	FluB	FluB	FluB	FluB	FluB	H3	H3	H3	H3	H3	H3	H3	H3	H3	H3	-38.430574609388124	0.31527374060111496	-12.20981721738963	0.17147300597018333	0.0	0.0
sequential	H3	H3	H3	H3	H3	H3	H3	H3	H3	FluB	FluB	FluB	FluB	FluB	H1	H1	-38.43143722631563	1.1858468502852682	-14.78040672130047	0.09838208531365734	0.0	0.0
sequential	H1	FluB	FluB	FluB	FluB	FluB	FluB	FluB	H3	H3	H3	H3	H3	H3	H3	H3	-38.44013390140116	0.3141392738251147	-11.316633805768989	0.20484975784993847	0.0	0.0
sequential	H3	H3	H3	H3	H3	H3	H3	H3	H3	H1	H1	FluB	FluB	FluB	FluB	FluB	-38.45146271916469	1.1248180093399578	-13.779341849928208	0.1149238550113264	0.0	0.0
sequential	H3	H3	H3	H3	H3	H3	H3	H3	H3	H3	FluB	FluB	FluB	FluB	FluB	FluB	-38.592429950683595	1.1712907590736032	-13.816710330877983	0.13242583443108744	0.0	0.0
sequential	H3	H3	H3	H3	H3	H3	H3	H3	H3	H3	H3	FluB	H1	H1	H1	H1	-38.642991986392666	1.2303874980162566	-14.18340611174093	0.10297133542491567	0.0	0.0
sequential	H3	H3	H3	H3	H3	H3	H3	H3	H3	FluB	FluB	FluB	FluB	FluB	FluB	H1	-38.89955341389127	1.207058374643379	-14.301243553573501	0.14021770056806665	0.0	0.0
sequential	FluB	FluB	FluB	FluB	FluB	FluB	H3	H3	H3	H3	H3	H3	H3	H3	H1	H1	-38.95127712618128	0.6549210803241347	-12.983953627125983	0.12543232279171174	0.0	0.0
sequential	H3	H3	H3	H3	H3	H3	H3	H3	H3	H3	FluB	FluB	H1	H1	H1	H1	-38.99981063247828	1.2629840564399173	-14.661249249140218	0.10084205769405834	0.0	0.0
sequential	H3	H3	H3	H3	H3	H3	H3	H3	H3	H1	H1	H1	H1	H1	FluB	FluB	-39.17337063152489	0.3904153672890605	-13.267284202953052	0.09674909304178271	0.0	0.0
sequential	H3	H3	H3	H3	H1	H1	H1	H1	H1	H1	FluB	FluB	FluB	FluB	FluB	FluB	-39.199654407580674	1.5332202424268042	-13.329455388707208	0.11404738712940375	0.0	0.0
sequential	FluB	FluB	FluB	FluB	FluB	FluB	FluB	H1	H3	H3	H3	H3	H3	H3	H3	H3	-39.25664193858498	0.2712016678799339	-11.673615969364148	0.1660889585207359	0.0	0.0
sequential	FluB	FluB	FluB	FluB	FluB	FluB	FluB	H1	H1	H1	H1	H1	H1	H3	H3	H3	-39.2847525436506	0.18408189894729607	-11.468552689513869	0.10600993933727142	0.0	0.0
sequential	H3	H3	H3	H3	H3	H3	H3	H3	H3	H3	H3	H1	H1	H1	H1	H1	-39.30611708640423	0.8980752630605676	-14.443001783561204	0.10355329954062409	0.0	0.0
sequential	FluB	FluB	FluB	FluB	H3	H3	H3	H3	H3	H3	H3	H1	H1	H1	H1	H1	-39.30611708640423	0.8980752630605676	-14.443001783561204	0.10355329954062409	0.0	0.0
sequential	FluB	FluB	FluB	H3	H3	H3	H3	H3	H3	H3	H3	H1	H1	H1	H1	H1	-39.30611708640423	0.8980752630605676	-14.443001783561204	0.10355329954062409	0.0	0.0
sequential	FluB	FluB	H3	H3	H3	H3	H3	H3	H3	H3	H3	H1	H1	H1	H1	H1	-39.30611708640423	0.8980752630605676	-14.443001783561204	0.10355329954062409	0.0	0.0
sequential	FluB	H3	H3	H3	H3	H3	H3	H3	H3	H3	H3	H1	H1	H1	H1	H1	-39.30611708640423	0.8980752630605676	-14.443001783561204	0.10355329954062409	0.0	0.0
sequential	FluB	FluB	FluB	FluB	FluB	H3	H3	H3	H3	H3	H3	H3	H1	H1	H1	H1	-39.323714166921356	1.0042428497312488	-13.989979475305972	0.1056381467901992	0.0	0.0
sequential	H3	H3	H3	H3	H3	H3	H3	H3	FluB	FluB	FluB	FluB	FluB	FluB	H1	H1	-39.453564701152644	1.864474112660528	-15.340335652433689	0.10328130690172119	0.0	0.0
sequential	H1	H1	H1	FluB	FluB	FluB	FluB	FluB	FluB	FluB	FluB	FluB	FluB	H3	H3	H3	-39.52544719756285	0.731373494292267	-12.286051290622218	0.19672659488331573	0.0	0.0
sequential	H3	H3	H3	H3	H3	H3	H3	H3	H3	H3	H1	H1	H1	H1	H1	FluB	-39.56450035694832	0.8809348699971075	-13.41178307871886	0.05975411154402795	0.0	0.0
sequential	H1	H1	H1	H1	H1	H1	FluB	FluB	FluB	FluB	FluB	FluB	FluB	FluB	FluB	FluB	-39.68338707709807	1.9415885320084183	-13.656002699241816	0.2620437155199655	0.0	0.0
sequential	H1	H3	H3	H3	H3	H3	H3	H3	FluB	FluB	FluB	FluB	FluB	FluB	FluB	FluB	-39.8339629381756	2.9882417800417422	-13.753901858706685	0.2361339255135029	0.0	0.0
sequential	H3	H3	H3	H3	H3	H3	H3	H3	H3	H1	FluB	FluB	FluB	FluB	FluB	FluB	-39.860704932220415	1.5149671482483482	-14.053913088392157	0.11755460792617188	0.0	0.0
sequential	H3	H3	H3	H3	H3	H3	H3	H3	H1	H1	H1	H1	FluB	FluB	FluB	FluB	-39.90196730082686	0.4942685047581806	-13.441567208078377	0.10947635902604157	0.0	0.0
sequential	H3	H3	H3	H3	H3	H3	H1	H1	H1	H1	H1	H1	H1	H1	FluB	FluB	-39.959502353293296	0.23643743334511882	-13.055133507022655	0.09912874236955184	0.0	0.0
sequential	H3	H3	H3	H3	H3	H3	H1	H1	H1	H1	H1	H1	H1	FluB	FluB	FluB	-40.00832276508949	0.35850706078747224	-13.106069484976889	0.11182092698896515	0.0	0.0
sequential	H3	H3	H3	H3	H3	H1	H1	H1	H1	H1	H1	FluB	FluB	FluB	FluB	FluB	-40.060451017584576	0.9689552978136414	-13.27894467557909	0.11065512860912378	0.0	0.0
sequential	H1	H1	H3	H3	H3	H3	H3	FluB	FluB	FluB	FluB	FluB	FluB	FluB	FluB	FluB	-40.07113787510643	2.9667202382824924	-13.78185457379404	0.22251645690193708	0.0	0.0
sequential	FluB	FluB	FluB	FluB	FluB	FluB	H1	H1	H1	H1	H1	H1	H1	H1	H1	H3	-40.16648483367482	0.2138854759297992	-13.138927488796426	0.048634200853620524	0.0	0.0
sequential	H3	H3	H3	H3	H3	H3	H1	H1	H1	H1	H1	H1	H1	H1	H1	FluB	-40.32060150664394	0.2004730668928263	-13.234696179276863	0.05904420464145888	0.0	0.0
sequential	H3	H3	H3	H3	H3	H3	H3	H3	H3	FluB	FluB	FluB	FluB	H1	H1	H1	-40.43838989930901	1.4097649524481994	-15.160317031332552	0.1082393203774673	0.0	0.0
sequential	FluB	FluB	FluB	FluB	FluB	FluB	FluB	H3	H3	H3	H3	H3	H3	H3	H3	H1	-40.53145786025067	0.9519443767732779	-12.508633573151299	0.09509257992532737	0.0	0.0
sequential	H3	H3	H3	H1	H1	H1	H1	H1	FluB	FluB	FluB	FluB	FluB	FluB	FluB	FluB	-40.532399491807865	2.7287358585232973	-13.578202564354527	0.1091827332663768	0.0	0.0
sequential	H3	H3	H3	H3	H3	H3	H3	H3	H3	FluB	FluB	FluB	H1	H1	H1	H1	-40.54127746088244	2.0393582483596764	-15.205628580623781	0.09584738426530058	0.0	0.0
sequential	H3	H3	H3	H3	H3	H3	H3	H3	FluB	FluB	FluB	FluB	H1	H1	H1	H1	-40.633457273692734	2.0982217357725177	-15.652930338427957	0.10015774862237503	0.0	0.0
sequential	FluB	FluB	FluB	H3	H3	H1	H1	H1	H1	H1	H1	H1	H1	H1	H1	H1	-40.646744696578125	0.7237535238206412	-14.665100049422788	0.10329274901078446	0.0	0.0
sequential	FluB	H3	H3	H3	H3	H1	H1	H1	H1	H1	H1	H1	H1	H1	H1	H1	-40.646744696578125	0.7237535238206412	-14.665100049422788	0.10329274901078446	0.0	0.0
sequential	FluB	FluB	FluB	FluB	H3	H1	H1	H1	H1	H1	H1	H1	H1	H1	H1	H1	-40.646744696578125	0.7237535238206412	-14.665100049422788	0.10329274901078446	0.0	0.0
sequential	H3	H3	H3	H3	H3	H1	H1	H1	H1	H1	H1	H1	H1	H1	H1	H1	-40.646744696578125	0.7237535238206412	-14.665100049422788	0.10329274901078446	0.0	0.0
sequential	FluB	FluB	H3	H3	H3	H1	H1	H1	H1	H1	H1	H1	H1	H1	H1	H1	-40.646744696578125	0.7237535238206412	-14.665100049422788	0.10329274901078446	0.0	0.0
sequential	H3	H3	FluB	FluB	FluB	H1	H1	H1	H1	H1	H1	H1	H1	H1	H1	H1	-40.64674469677034	0.7237535238968479	-14.6661633961898	0.1032628731633767	0.0	0.0
sequential	H3	H3	H3	FluB	FluB	H1	H1	H1	H1	H1	H1	H1	H1	H1	H1	H1	-40.64674469677034	0.7237535238968479	-14.6661633961898	0.1032628731633767	0.0	0.0
sequential	FluB	FluB	FluB	FluB	FluB	H1	H1	H1	H1	H1	H1	H1	H1	H1	H1	H1	-40.64674469677034	0.7237535238968479	-14.6661633961898	0.1032628731633767	0.0	0.0
sequential	H3	FluB	FluB	FluB	FluB	H1	H1	H1	H1	H1	H1	H1	H1	H1	H1	H1	-40.64674469677034	0.7237535238968479	-14.6661633961898	0.1032628731633767	0.0	0.0
sequential	H3	H3	H3	H3	FluB	H1	H1	H1	H1	H1	H1	H1	H1	H1	H1	H1	-40.64674469677034	0.7237535238968479	-14.6661633961898	0.1032628731633767	0.0	0.0
sequential	H3	H1	H1	H1	H1	H1	FluB	FluB	FluB	FluB	FluB	FluB	FluB	FluB	FluB	FluB	-40.74583249314374	2.951047566949978	-14.109347133075355	0.18712139824712407	0.0	0.0
sequential	H3	H3	H3	H3	H3	H3	H3	H3	FluB	FluB	FluB	FluB	FluB	FluB	FluB	H1	-40.792133643359755	1.4314122539789214	-14.861702656453822	0.13300364250452731	0.0	0.0
sequential	FluB	FluB	FluB	FluB	FluB	FluB	FluB	H1	H1	H1	H1	H1	H1	H1	H3	H3	-40.80421520543884	0.14435315846792462	-12.062868862414343	0.08488259000654833	0.0	0.0
sequential	FluB	FluB	FluB	FluB	FluB	FluB	FluB	H3	H3	H3	H3	H3	H3	H3	H3	H3	-40.811708860216456	0.31079138040489107	-12.23909887406637	0.169537878004883	0.0	0.0
sequential	FluB	FluB	FluB	FluB	FluB	FluB	H3	H3	H3	H3	H3	H3	H3	H1	H1	H1	-40.923252010220544	0.8705904079877272	-13.497991995075845	0.11582726977830335	0.0	0.0
sequential	H3	H3	H1	H1	H1	H1	H1	FluB	FluB	FluB	FluB	FluB	FluB	FluB	FluB	FluB	-40.975397580058484	2.5288858256026097	-13.720335978147569	0.12014321865318191	0.0	0.0
sequential	H3	H3	H3	H3	H3	H3	H3	H3	FluB	FluB	FluB	FluB	FluB	H1	H1	H1	-41.02273189861359	1.40189261436523	-15.697895099493257	0.10909864103232028	0.0	0.0
sequential	H3	H3	H3	H3	H3	H3	H3	H3	H1	H1	H1	FluB	FluB	FluB	FluB	FluB	-41.03115755078476	1.279393538429464	-13.683458772268876	0.11132015885879461	0.0	0.0
sequential	H1	H1	H1	FluB	FluB	FluB	FluB	FluB	FluB	FluB	FluB	FluB	FluB	FluB	FluB	H3	-41.049903669477956	0.7673129515408937	-13.239342401418734	0.1911902488106106	0.0	0.0
sequential	H3	H3	H3	H3	H3	H3	H3	H3	H1	H1	H1	H1	H1	FluB	FluB	FluB	-41.11571686548938	0.616391305547193	-13.27350328264691	0.10783138396028025	0.0	0.0
sequential	H3	H3	H3	H3	H3	H3	H1	H1	H1	H1	H1	H1	FluB	FluB	FluB	FluB	-41.17385085538001	0.5185852018588171	-13.217857887492343	0.11228494142397495	0.0	0.0
sequential	H1	H1	FluB	FluB	FluB	FluB	FluB	FluB	FluB	FluB	FluB	FluB	H3	H3	H3	H3	-41.18921261254606	0.5482107313880664	-12.049011355663868	0.18804141597190535	0.0	0.0
sequential	H1	H1	FluB	FluB	FluB	FluB	FluB	FluB	FluB	FluB	H3	H3	H3	H3	H3	H3	-41.27916248805181	0.4208319498301743	-11.409047971134589	0.20426421142702736	0.0	0.0
sequential	H1	H1	H1	H3	H3	H3	FluB	FluB	FluB	FluB	FluB	FluB	FluB	FluB	FluB	FluB	-41.37200507805916	2.6795196189196737	-13.752469436678645	0.2389572403350122	0.0	0.0
sequential	FluB	FluB	FluB	FluB	FluB	FluB	FluB	FluB	H1	H1	H1	H3	H3	H3	H3	H3	-41.622836667964314	0.1972029334149228	-11.318936924402758	0.1428895638523327	0.0	0.0
sequential	H3	H3	H3	H3	H1	H1	H1	H1	H1	FluB	FluB	FluB	FluB	FluB	FluB	FluB	-41.76684288529493	1.975055960219122	-13.477408313149645	0.11230949258120376	0.0	0.0
sequential	H1	FluB	FluB	FluB	FluB	FluB	FluB	FluB	FluB	H3	H3	H3	H3	H3	H3	H3	-41.799821122900475	0.2986769269199513	-11.433670467234355	0.20109612077757427	0.0	0.0
sequential	FluB	FluB	FluB	FluB	FluB	FluB	FluB	FluB	H1	H1	H1	H1	H3	H3	H3	H3	-41.839525619513196	0.18650950253321724	-11.36216758149383	0.12846661374639326	0.0	0.0
sequential	FluB	FluB	FluB	FluB	FluB	FluB	FluB	FluB	H1	H1	H3	H3	H3	H3	H3	H3	-41.85415479287837	0.23278076580851778	-11.465141246830614	0.15205439893394013	0.0	0.0
sequential	FluB	FluB	FluB	FluB	FluB	H3	H3	H3	H3	H3	H3	H1	H1	H1	H1	H1	-42.0069519752943	0.996577370516403	-14.466512388210619	0.1035241783533858	0.0	0.0
sequential	H3	H3	H3	H3	H3	H3	H3	H3	H3	H1	H1	H1	H1	H1	H1	FluB	-42.01995682732911	0.5509719610494199	-13.420764267471291	0.05871848183556719	0.0	0.0
sequential	H3	H3	H3	H3	H3	H3	H3	H3	H1	H1	H1	H1	H1	H1	FluB	FluB	-42.086902675291924	0.40350249486409967	-13.184232193635188	0.09488453641019051	0.0	0.0
sequential	H1	H1	FluB	FluB	FluB	FluB	FluB	FluB	FluB	FluB	FluB	H3	H3	H3	H3	H3	-42.11213214499613	0.9553906455859045	-11.685913679469293	0.19679620023617145	0.0	0.0
sequential	H3	H3	H3	H3	H3	H3	H3	H3	H1	H1	FluB	FluB	FluB	FluB	FluB	FluB	-42.182582382811	1.5232592551771273	-13.990092430847108	0.11162783432827957	0.0	0.0
sequential	H1	H1	FluB	FluB	FluB	FluB	FluB	FluB	FluB	FluB	FluB	FluB	FluB	FluB	H3	H3	-42.2425032157535	1.5154118197411293	-13.033817308421526	0.18484730913462322	0.0	0.0
sequential	FluB	FluB	FluB	FluB	FluB	FluB	FluB	H3	H3	H3	H3	H3	H3	H3	H1	H1	-42.401092513487825	0.5984899667585986	-13.075924134557232	0.12309383762372746	0.0	0.0
sequential	H1	H1	H1	H1	H3	FluB	FluB	FluB	FluB	FluB	FluB	FluB	FluB	FluB	FluB	FluB	-42.49613549046535	2.5674325338625126	-13.772942256656048	0.2528032840152472	0.0	0.0
sequential	FluB	FluB	FluB	FluB	FluB	FluB	FluB	FluB	H1	H1	H1	H1	H1	H3	H3	H3	-42.50872037477097	0.18870185853348115	-11.608292912632246	0.10361769985602201	0.0	0.0
sequential	H1	H1	H1	H1	H1	FluB	FluB	FluB	FluB	FluB	FluB	FluB	FluB	FluB	FluB	FluB	-42.529746566456275	1.9260990084228864	-13.722057809123015	0.2574303033197646	0.0	0.0
sequential	FluB	FluB	FluB	FluB	FluB	FluB	FluB	FluB	H1	H3	H3	H3	H3	H3	H3	H3	-42.65594822371292	0.2473558717849133	-11.798943305360268	0.16008099328150774	0.0	0.0
sequential	H3	H3	H3	H3	H3	H3	H3	H3	H3	FluB	FluB	FluB	FluB	FluB	FluB	FluB	-42.66246836501541	2.1212228872677374	-14.356024417183948	0.12149858267824855	0.0	0.0
sequential	H3	H3	H3	H3	H3	H1	H1	H1	H1	H1	FluB	FluB	FluB	FluB	FluB	FluB	-42.75496182379232	1.53939473390663	-13.435546397976065	0.109942692550477	0.0	0.0
sequential	FluB	FluB	FluB	FluB	FluB	FluB	H3	H3	H3	H3	H3	H3	H1	H1	H1	H1	-42.77538650709267	0.9684828610457623	-14.063693769359855	0.10688943537115532	0.0	0.0
sequential	H3	H3	H3	H3	H3	H3	H3	H1	H1	H1	H1	H1	FluB	FluB	FluB	FluB	-42.84378927474078	0.7703287211024151	-13.307216427862405	0.10980995583569077	0.0	0.0
sequential	H3	H3	H3	H3	H3	H3	H3	H3	H3	H3	FluB	H1	H1	H1	H1	H1	-42.959229935232216	1.3626466231273622	-14.811361910081757	0.10124193591154419	0.0	0.0
sequential	H3	H3	H3	H3	H3	H3	H3	H1	H1	H1	H1	H1	H1	FluB	FluB	FluB	-42.998709183182044	0.3746688371935044	-13.166544041267198	0.10897179339675872	0.0	0.0
sequential	H3	H3	H3	H3	H3	H3	H3	H3	H3	H3	H1	H1	H1	H1	H1	H1	-43.02220323470938	0.9580299319215198	-14.794402658093203	0.1063499395151102	0.0	0.0
sequential	FluB	FluB	FluB	FluB	H3	H3	H3	H3	H3	H3	H1	H1	H1	H1	H1	H1	-43.02220323470938	0.9580299319215198	-14.794402658093203	0.1063499395151102	0.0	0.0
sequential	FluB	FluB	H3	H3	H3	H3	H3	H3	H3	H3	H1	H1	H1	H1	H1	H1	-43.02220323470938	0.9580299319215198	-14.794402658093203	0.1063499395151102	0.0	0.0
sequential	FluB	FluB	FluB	H3	H3	H3	H3	H3	H3	H3	H1	H1	H1	H1	H1	H1	-43.02220323470938	0.9580299319215198	-14.794402658093203	0.1063499395151102	0.0	0.0
sequential	FluB	H3	H3	H3	H3	H3	H3	H3	H3	H3	H1	H1	H1	H1	H1	H1	-43.02220323470938	0.9580299319215198	-14.794402658093203	0.1063499395151102	0.0	0.0
sequential	H3	H3	H3	H3	H3	H3	H3	H1	H1	H1	H1	H1	H1	H1	FluB	FluB	-43.045893278929654	0.21417614492672135	-13.096345463091499	0.0962820996800511	0.0	0.0
sequential	FluB	FluB	FluB	FluB	FluB	FluB	FluB	H1	H1	H1	H1	H1	H1	H1	H1	H3	-43.08668727676449	0.1629229042047802	-13.155373976455438	0.04801398037042451	0.0	0.0
sequential	H3	H3	H3	H3	H3	H3	H3	H1	H1	H1	H1	H1	H1	H1	H1	FluB	-43.23605908009511	0.13558486055245428	-13.259304544818288	0.0572449427338935	0.0	0.0
sequential	H1	H1	FluB	FluB	FluB	FluB	FluB	FluB	FluB	FluB	FluB	FluB	FluB	H3	H3	H3	-43.42970564775004	0.838535777006582	-12.502260994210502	0.17797538096583246	0.0	0.0
sequential	H3	H3	H3	H3	H3	H3	H1	H1	H1	H1	H1	H1	H1	H1	H1	H1	-43.529223210600996	0.7212693004468513	-14.704454581325315	0.10559555376728566	0.0	0.0
sequential	FluB	FluB	FluB	H3	H3	H3	H1	H1	H1	H1	H1	H1	H1	H1	H1	H1	-43.529223210600996	0.7212693004468513	-14.704454581325315	0.10559555376728566	0.0	0.0
sequential	FluB	H3	H3	H3	H3	H3	H1	H1	H1	H1	H1	H1	H1	H1	H1	H1	-43.529223210600996	0.7212693004468513	-14.704454581325315	0.10559555376728566	0.0	0.0
sequential	FluB	FluB	H3	H3	H3	H3	H1	H1	H1	H1	H1	H1	H1	H1	H1	H1	-43.529223210600996	0.7212693004468513	-14.704454581325315	0.10559555376728566	0.0	0.0
sequential	FluB	FluB	FluB	FluB	H3	H3	H1	H1	H1	H1	H1	H1	H1	H1	H1	H1	-43.529223210600996	0.7212693004468513	-14.704454581325315	0.10559555376728566	0.0	0.0
sequential	FluB	FluB	FluB	FluB	FluB	H3	H1	H1	H1	H1	H1	H1	H1	H1	H1	H1	-43.5292238570037	0.7212694561664216	-14.70633114194014	0.10561509320461022	0.0	0.0
sequential	H3	H3	H3	H3	H3	FluB	H1	H1	H1	H1	H1	H1	H1	H1	H1	H1	-43.529223903924866	0.7212694235284407	-14.710186409310445	0.10570387953056087	0.0	0.0
sequential	FluB	FluB	FluB	FluB	FluB	FluB	H1	H1	H1	H1	H1	H1	H1	H1	H1	H1	-43.52922391201872	0.7212694168848637	-14.711249023970398	0.10567822584782353	0.0	0.0
sequential	H3	H3	H3	H3	FluB	FluB	H1	H1	H1	H1	H1	H1	H1	H1	H1	H1	-43.52922391201872	0.7212694168848637	-14.711249023970398	0.10567822584782353	0.0	0.0
sequential	H3	H3	H3	FluB	FluB	FluB	H1	H1	H1	H1	H1	H1	H1	H1	H1	H1	-43.52922391201872	0.7212694168848637	-14.711249023970398	0.10567822584782353	0.0	0.0
sequential	H3	H3	FluB	FluB	FluB	FluB	H1	H1	H1	H1	H1	H1	H1	H1	H1	H1	-43.52922391201872	0.7212694168848637	-14.711249023970398	0.10567822584782353	0.0	0.0
sequential	H3	FluB	FluB	FluB	FluB	FluB	H1	H1	H1	H1	H1	H1	H1	H1	H1	H1	-43.52922391201872	0.7212694168848637	-14.711249023970398	0.10567822584782353	0.0	0.0
sequential	H3	H3	H3	H3	H3	H3	H1	H1	H1	H1	H1	FluB	FluB	FluB	FluB	FluB	-43.617882636498805	0.9881890121556546	-13.376618315173243	0.11344403004358061	0.0	0.0
sequential	H3	H3	H3	H3	H3	H3	H3	H3	H1	FluB	FluB	FluB	FluB	FluB	FluB	FluB	-43.699934513743855	2.3709842414723523	-14.366470256126624	0.11251771206885144	0.0	0.0
sequential	H3	H3	H3	H3	H3	H3	H3	H3	H3	FluB	FluB	H1	H1	H1	H1	H1	-43.723855432562544	2.048434211342944	-15.199169194408688	0.09859840291506716	0.0	0.0
sequential	FluB	FluB	FluB	FluB	FluB	FluB	FluB	FluB	H3	H3	H3	H3	H3	H3	H3	H3	-43.77198079100448	0.27840588701153957	-12.299894973718507	0.16695784345621834	0.0	0.0
sequential	FluB	FluB	FluB	FluB	FluB	FluB	FluB	FluB	H1	H1	H1	H1	H1	H1	H3	H3	-43.79757578171221	0.14121955512548062	-12.167415509651722	0.08199313966887786	0.0	0.0
sequential	H3	H3	H3	H3	H3	H3	H3	H3	FluB	FluB	FluB	H1	H1	H1	H1	H1	-43.893828601987146	1.7220024249080954	-15.489121097519217	0.1020559173126678	0.0	0.0
sequential	H3	H3	H3	H3	H3	H3	H3	H1	H1	H1	H1	FluB	FluB	FluB	FluB	FluB	-43.97506295563405	1.4876809020583714	-13.508033497316982	0.11107339606059834	0.0	0.0
sequential	FluB	FluB	FluB	FluB	FluB	FluB	FluB	FluB	H3	H3	H3	H3	H3	H3	H3	H1	-44.15647057974076	0.9008670489909226	-12.62455482056272	0.09358898994865107	0.0	0.0
sequential	H3	H3	H3	H3	H3	H3	H3	FluB	FluB	FluB	FluB	FluB	FluB	FluB	H1	H1	-44.31563308883148	1.738858708717087	-15.7161030497685	0.10648848933089466	0.0	0.0
sequential	H3	H3	H3	H1	H1	H1	H1	FluB	FluB	FluB	FluB	FluB	FluB	FluB	FluB	FluB	-44.35918161619555	2.7065253702844925	-13.749167079844367	0.10928016171036263	0.0	0.0
sequential	FluB	FluB	FluB	FluB	FluB	FluB	FluB	H3	H3	H3	H3	H3	H3	H1	H1	H1	-44.37710383255615	0.8696214348505223	-13.617317606130012	0.11576444396034981	0.0	0.0
sequential	H3	H3	H3	H3	H1	H1	H1	H1	FluB	FluB	FluB	FluB	FluB	FluB	FluB	FluB	-44.45108411250534	2.6545196801759574	-13.659843222176693	0.11064250346748529	0.0	0.0
sequential	H3	H1	H1	H1	H1	FluB	FluB	FluB	FluB	FluB	FluB	FluB	FluB	FluB	FluB	FluB	-44.50351424721119	2.8849974073198177	-14.213690243370582	0.17900731296791786	0.0	0.0
sequential	H1	H3	H3	H3	H3	H3	H3	FluB	FluB	FluB	FluB	FluB	FluB	FluB	FluB	FluB	-44.66978873862586	2.964053658790255	-14.068934935315275	0.23502273547641248	0.0	0.0
sequential	H3	H3	H1	H1	H1	H1	FluB	FluB	FluB	FluB	FluB	FluB	FluB	FluB	FluB	FluB	-44.89510014234077	2.4547906881618844	-13.856092726499003	0.12102007511334271	0.0	0.0
sequential	H3	H3	H3	H3	H3	H3	H3	H1	H1	H1	FluB	FluB	FluB	FluB	FluB	FluB	-44.914092200529375	1.5680669037648243	-13.768429807401873	0.11023183902783755	0.0	0.0
sequential	H3	H3	H3	H3	H3	H3	H3	H3	H1	H1	H1	H1	H1	H1	H1	FluB	-44.9345657103643	0.34196546618886026	-13.335401034444038	0.056839333534315306	0.0	0.0
sequential	H1	H1	FluB	FluB	FluB	FluB	FluB	FluB	FluB	FluB	FluB	FluB	FluB	FluB	FluB	H3	-45.195794572094165	0.5958879882007784	-13.480825586453129	0.17092297732930364	0.0	0.0
sequential	H3	H3	H3	H3	H3	H3	H3	H3	FluB	FluB	FluB	FluB	FluB	FluB	FluB	FluB	-45.299792324678236	3.0234612781899366	-14.800893448957376	0.11556651909753	0.0	0.0
sequential	H1	H1	H3	H3	H3	H3	FluB	FluB	FluB	FluB	FluB	FluB	FluB	FluB	FluB	FluB	-45.341430154775274	2.8803848452648646	-14.001439875621404	0.22107997805978286	0.0	0.0
sequential	H1	FluB	FluB	FluB	FluB	FluB	FluB	FluB	FluB	FluB	H3	H3	H3	H3	H3	H3	-45.51327494973105	0.2891490346553173	-11.61605401662852	0.1961451342203434	0.0	0.0
sequential	FluB	FluB	FluB	FluB	FluB	FluB	H3	H3	H3	H3	H3	H1	H1	H1	H1	H1	-45.530042130050205	1.008875673934231	-14.542228484865738	0.1045818059302692	0.0	0.0
sequential	H3	H3	H3	H3	H3	H3	H3	FluB	FluB	FluB	FluB	FluB	H1	H1	H1	H1	-45.60064329734818	1.9928203565014144	-15.932425631523738	0.10149076462166144	0.0	0.0
sequential	H1	FluB	FluB	FluB	FluB	FluB	FluB	FluB	FluB	FluB	FluB	FluB	H3	H3	H3	H3	-45.615646063031186	0.4887821997118869	-12.211105960619417	0.1852440265974496	0.0	0.0
sequential	H3	H3	H3	H3	H3	H3	H3	FluB	FluB	FluB	FluB	FluB	FluB	FluB	FluB	H1	-45.7087115330416	1.37681739597083	-15.229912579098484	0.12791096198225405	0.0	0.0
sequential	H3	H3	H3	H3	H3	H1	H1	H1	H1	FluB	FluB	FluB	FluB	FluB	FluB	FluB	-45.74947068778815	1.8008449938588507	-13.628979181198286	0.10853301432297358	0.0	0.0
sequential	H3	H3	H3	H3	H3	H3	H3	H1	H1	FluB	FluB	FluB	FluB	FluB	FluB	FluB	-45.7567852135213	2.500426704329214	-14.10482736051809	0.10936320095794484	0.0	0.0
sequential	FluB	FluB	FluB	FluB	FluB	FluB	FluB	FluB	FluB	H1	H1	H1	H3	H3	H3	H3	-45.844803946025685	0.17968028676501246	-11.683548220836318	0.12562611591387485	0.0	0.0
sequential	FluB	FluB	FluB	FluB	FluB	H3	H3	H3	H3	H3	H1	H1	H1	H1	H1	H1	-45.85527852473524	0.9907244566302117	-14.814885169575158	0.10624257815203686	0.0	0.0
sequential	H1	H1	H1	H1	FluB	FluB	FluB	FluB	FluB	FluB	FluB	FluB	FluB	FluB	FluB	FluB	-45.8823520972567	1.9054006154732681	-13.799290497775285	0.25288953707718653	0.0	0.0
sequential	H1	H1	H1	H3	H3	FluB	FluB	FluB	FluB	FluB	FluB	FluB	FluB	FluB	FluB	FluB	-45.951421063338934	2.6198770906705335	-13.846221460878986	0.24133683763696065	0.0	0.0
sequential	FluB	FluB	FluB	FluB	FluB	FluB	FluB	FluB	H1	H1	H1	H1	H1	H1	H1	H3	-45.97394408285435	0.14308076519463025	-13.25938348819619	0.04490180145459916	0.0	0.0
sequential	FluB	FluB	FluB	FluB	FluB	FluB	FluB	FluB	FluB	H1	H1	H3	H3	H3	H3	H3	-45.98789856454601	0.1962421841831235	-11.738563648729787	0.14029926820321634	0.0	0.0
sequential	FluB	FluB	FluB	FluB	FluB	FluB	FluB	FluB	H3	H3	H3	H3	H3	H3	H1	H1	-46.12551897449933	0.5932793559770866	-13.229760209548806	0.11910552594460534	0.0	0.0
sequential	FluB	FluB	FluB	H3	H3	H3	H3	H3	H3	H1	H1	H1	H1	H1	H1	H1	-46.13363571008367	0.7873325299031156	-14.894735417682107	0.10548003938275628	0.0	0.0
sequential	FluB	H3	H3	H3	H3	H3	H3	H3	H3	H1	H1	H1	H1	H1	H1	H1	-46.13363571008367	0.7873325299031156	-14.894735417682107	0.10548003938275628	0.0	0.0
sequential	FluB	FluB	H3	H3	H3	H3	H3	H3	H3	H1	H1	H1	H1	H1	H1	H1	-46.13363571008367	0.7873325299031156	-14.894735417682107	0.10548003938275628	0.0	0.0
sequential	FluB	FluB	FluB	FluB	H3	H3	H3	H3	H3	H1	H1	H1	H1	H1	H1	H1	-46.13363571008367	0.7873325299031156	-14.894735417682107	0.10548003938275628	0.0	0.0
sequential	H3	H3	H3	H3	H3	H3	H3	H3	H3	H1	H1	H1	H1	H1	H1	H1	-46.13363571008367	0.7873325299031156	-14.894735417682107	0.10548003938275628	0.0	0.0
sequential	H3	H3	H3	H3	H3	H3	H3	FluB	FluB	FluB	FluB	FluB	FluB	H1	H1	H1	-46.13729681982097	1.323721065550336	-16.04714695724674	0.10800794528221248	0.0	0.0
sequential	FluB	FluB	FluB	FluB	FluB	FluB	FluB	FluB	FluB	H1	H1	H1	H1	H3	H3	H3	-46.2722844175333	0.16695622313695138	-11.860961971160998	0.09963489547185862	0.0	0.0
sequential	H3	H3	H3	H3	H3	H3	H1	H1	H1	H1	FluB	FluB	FluB	FluB	FluB	FluB	-46.32680653839152	1.4252704060787498	-13.579664196241078	0.11236734572725589	0.0	0.0
sequential	H3	H3	H3	H3	H3	H3	H3	H3	H3	FluB	H1	H1	H1	H1	H1	H1	-46.36555377001252	1.5267601455810107	-15.070739486135771	0.10497689127678844	0.0	0.0
sequential	FluB	FluB	H3	H3	H3	H3	H3	H1	H1	H1	H1	H1	H1	H1	H1	H1	-46.42291682137084	0.6213140457089142	-14.74774686364537	0.10580064758909068	0.0	0.0
sequential	FluB	FluB	FluB	H3	H3	H3	H3	H1	H1	H1	H1	H1	H1	H1	H1	H1	-46.42291682137084	0.6213140457089142	-14.74774686364537	0.10580064758909068	0.0	0.0
sequential	H3	H3	H3	H3	H3	H3	H3	H1	H1	H1	H1	H1	H1	H1	H1	H1	-46.42291682137084	0.6213140457089142	-14.74774686364537	0.10580064758909068	0.0	0.0
sequential	FluB	H3	H3	H3	H3	H3	H3	H1	H1	H1	H1	H1	H1	H1	H1	H1	-46.42291682137084	0.6213140457089142	-14.74774686364537	0.10580064758909068	0.0	0.0
sequential	FluB	FluB	FluB	FluB	H3	H3	H3	H1	H1	H1	H1	H1	H1	H1	H1	H1	-46.42291682137084	0.6213140457089142	-14.74774686364537	0.10580064758909068	0.0	0.0
sequential	FluB	FluB	FluB	FluB	FluB	H3	H3	H1	H1	H1	H1	H1	H1	H1	H1	H1	-46.4238732204023	0.6213457422680669	-14.751325758224295	0.10575844554374043	0.0	0.0
sequential	H3	H3	H3	H3	H3	H3	FluB	H1	H1	H1	H1	H1	H1	H1	H1	H1	-46.42394209500036	0.6213080813377168	-14.769032207366571	0.10556036818455472	0.0	0.0
sequential	FluB	FluB	FluB	FluB	FluB	FluB	H3	H1	H1	H1	H1	H1	H1	H1	H1	H1	-46.42394831146205	0.6213065234749093	-14.761445853221797	0.10573093666053131	0.0	0.0
sequential	H3	H3	H3	H3	H3	FluB	FluB	H1	H1	H1	H1	H1	H1	H1	H1	H1	-46.42394973259513	0.6213058635092678	-14.775039610419851	0.10562580185613193	0.0	0.0
sequential	FluB	FluB	FluB	FluB	FluB	FluB	FluB	H1	H1	H1	H1	H1	H1	H1	H1	H1	-46.42394979133882	0.6213058410395956	-14.77616743787507	0.1055904658692598	0.0	0.0
sequential	H3	H3	FluB	FluB	FluB	FluB	FluB	H1	H1	H1	H1	H1	H1	H1	H1	H1	-46.42394979133882	0.6213058410395956	-14.77616743787507	0.1055904658692598	0.0	0.0
sequential	H3	H3	H3	H3	FluB	FluB	FluB	H1	H1	H1	H1	H1	H1	H1	H1	H1	-46.42394979133882	0.6213058410395956	-14.77616743787507	0.1055904658692598	0.0	0.0
sequential	H3	H3	H3	FluB	FluB	FluB	FluB	H1	H1	H1	H1	H1	H1	H1	H1	H1	-46.42394979133882	0.6213058410395956	-14.77616743787507	0.1055904658692598	0.0	0.0
sequential	H3	FluB	FluB	FluB	FluB	FluB	FluB	H1	H1	H1	H1	H1	H1	H1	H1	H1	-46.42394979133882	0.6213058410395956	-14.77616743787507	0.1055904658692598	0.0	0.0
sequential	FluB	FluB	FluB	FluB	FluB	FluB	FluB	FluB	FluB	H1	H3	H3	H3	H3	H3	H3	-46.457937109740406	0.2359110509656932	-11.994890577475582	0.15022684695851554	0.0	0.0
sequential	H1	FluB	FluB	FluB	FluB	FluB	FluB	FluB	FluB	FluB	FluB	H3	H3	H3	H3	H3	-46.48100215330547	1.0038919242131097	-11.870376417366925	0.19144311059950522	0.0	0.0
sequential	FluB	FluB	FluB	FluB	FluB	FluB	FluB	H3	H3	H3	H3	H3	H1	H1	H1	H1	-46.53879026013239	0.9709934587959366	-14.210596541278084	0.10716694068618221	0.0	0.0
sequential	H1	FluB	FluB	FluB	FluB	FluB	FluB	FluB	FluB	FluB	FluB	FluB	FluB	FluB	H3	H3	-46.75799445796405	1.388935652893819	-13.191687185710972	0.18188005144855526	0.0	0.0
sequential	H3	H3	H3	H3	H3	H3	H3	H1	FluB	FluB	FluB	FluB	FluB	FluB	FluB	FluB	-46.91324499863201	2.9938758675445785	-14.534051582086713	0.10836009118108338	0.0	0.0
sequential	FluB	FluB	FluB	FluB	FluB	FluB	FluB	FluB	FluB	H3	H3	H3	H3	H3	H3	H3	-47.1022936653231	0.25325677235078015	-12.407414094698634	0.16109667816483442	0.0	0.0
sequential	H3	H3	H3	H3	H3	H3	H3	H3	FluB	FluB	H1	H1	H1	H1	H1	H1	-47.20729391610214	1.8409607233257674	-15.27713829868784	0.10555174919493664	0.0	0.0
sequential	FluB	FluB	FluB	FluB	FluB	FluB	FluB	FluB	FluB	H1	H1	H1	H1	H1	H3	H3	-47.41307611564228	0.12630668169030235	-12.372351436700226	0.07826736854894822	0.0	0.0
sequential	H1	FluB	FluB	FluB	FluB	FluB	FluB	FluB	FluB	FluB	FluB	FluB	FluB	H3	H3	H3	-47.83461929296352	0.8439362478220486	-12.64899537202174	0.17840597435144454	0.0	0.0
sequential	FluB	FluB	FluB	FluB	FluB	FluB	FluB	FluB	FluB	H3	H3	H3	H3	H3	H3	H1	-48.014091236268264	0.849805111194016	-12.803978018964889	0.09219281522482825	0.0	0.0
sequential	FluB	FluB	FluB	FluB	FluB	FluB	FluB	FluB	H3	H3	H3	H3	H3	H1	H1	H1	-48.15183841363107	0.8228637599984595	-13.812835466708716	0.11411311354876444	0.0	0.0
sequential	H3	H3	H3	H3	H1	H1	H1	FluB	FluB	FluB	FluB	FluB	FluB	FluB	FluB	FluB	-48.50317072704643	2.610578443300504	-13.891953577319203	0.10980522686781544	0.0	0.0
sequential	H3	H1	H1	H1	FluB	FluB	FluB	FluB	FluB	FluB	FluB	FluB	FluB	FluB	FluB	FluB	-48.5662557329099	2.784098099648771	-14.344158753646273	0.16924719433126467	0.0	0.0
sequential	H3	H3	H3	H1	H1	H1	FluB	FluB	FluB	FluB	FluB	FluB	FluB	FluB	FluB	FluB	-48.60075030811749	2.586838763603842	-13.964623500992547	0.10875646402184097	0.0	0.0
sequential	H3	H3	H3	H3	H3	H3	H1	H1	H1	FluB	FluB	FluB	FluB	FluB	FluB	FluB	-48.62777812244809	1.7624734146982866	-13.837948327875258	0.11065653915173926	0.0	0.0
sequential	FluB	FluB	FluB	H3	H3	H3	H3	H3	H1	H1	H1	H1	H1	H1	H1	H1	-48.66678179866111	0.7959978203629469	-14.834499477264579	0.10516010494149491	0.0	0.0
sequential	FluB	FluB	H3	H3	H3	H3	H3	H3	H1	H1	H1	H1	H1	H1	H1	H1	-48.66678179866111	0.7959978203629469	-14.834499477264579	0.10516010494149491	0.0	0.0
sequential	H3	H3	H3	H3	H3	H3	H3	H3	H1	H1	H1	H1	H1	H1	H1	H1	-48.66678179866111	0.7959978203629469	-14.834499477264579	0.10516010494149491	0.0	0.0
sequential	FluB	FluB	FluB	FluB	H3	H3	H3	H3	H1	H1	H1	H1	H1	H1	H1	H1	-48.66678179866111	0.7959978203629469	-14.834499477264579	0.10516010494149491	0.0	0.0
sequential	FluB	H3	H3	H3	H3	H3	H3	H3	H1	H1	H1	H1	H1	H1	H1	H1	-48.66678179866111	0.7959978203629469	-14.834499477264579	0.10516010494149491	0.0	0.0
sequential	FluB	FluB	FluB	FluB	FluB	H3	H3	H3	H3	H1	H1	H1	H1	H1	H1	H1	-48.82592580972399	0.9569773994040557	-14.908318265031033	0.10549045897208309	0.0	0.0
sequential	H3	H3	H3	H3	H3	H3	H3	FluB	FluB	FluB	FluB	H1	H1	H1	H1	H1	-48.86248918375294	1.5855917773495773	-15.657104124358106	0.10224755490871831	0.0	0.0
sequential	H3	H3	H1	H1	H1	FluB	FluB	FluB	FluB	FluB	FluB	FluB	FluB	FluB	FluB	FluB	-48.94699421781088	2.4266908721782126	-14.038077068321462	0.11765159374887187	0.0	0.0
sequential	H3	H3	H3	H3	H3	H1	H1	H1	FluB	FluB	FluB	FluB	FluB	FluB	FluB	FluB	-48.96698514041968	2.3833050654906653	-13.874937895448989	0.10702543669148155	0.0	0.0
sequential	H1	H1	H1	H3	FluB	FluB	FluB	FluB	FluB	FluB	FluB	FluB	FluB	FluB	FluB	FluB	-49.23202598401862	2.0554144793395293	-13.869267355092974	0.2415586722889177	0.0	0.0
sequential	H1	H1	H1	FluB	FluB	FluB	FluB	FluB	FluB	FluB	FluB	FluB	FluB	FluB	FluB	FluB	-49.23202598401862	2.0554144793395293	-13.869267355092974	0.2415586722889177	0.0	0.0
sequential	FluB	FluB	FluB	FluB	FluB	H3	H3	H3	H1	H1	H1	H1	H1	H1	H1	H1	-49.28008268973597	0.5843596564906496	-14.841531186949599	0.10514186758878194	0.0	0.0
sequential	H3	H3	H3	H3	H3	H3	H3	FluB	H1	H1	H1	H1	H1	H1	H1	H1	-49.328953966179974	0.5471018170427718	-14.895275379449968	0.10540875318777437	0.0	0.0
sequential	FluB	FluB	FluB	FluB	FluB	FluB	H3	H3	H1	H1	H1	H1	H1	H1	H1	H1	-49.3375003443173	0.5445259058840214	-14.862049714357513	0.10533874523899409	0.0	0.0
sequential	H3	H3	H3	H3	H3	H3	FluB	FluB	H1	H1	H1	H1	H1	H1	H1	H1	-49.33878194625385	0.5437677306098587	-14.919263579647533	0.10533978614581738	0.0	0.0
sequential	FluB	FluB	FluB	FluB	FluB	FluB	FluB	H3	H1	H1	H1	H1	H1	H1	H1	H1	-49.33883203976994	0.5437503566246328	-14.893624302798687	0.10546194928609412	0.0	0.0
sequential	H3	H3	H3	H3	H3	FluB	FluB	FluB	H1	H1	H1	H1	H1	H1	H1	H1	-49.33885619832223	0.5437308539204856	-14.926072190291416	0.10547162316725435	0.0	0.0
sequential	H3	H3	FluB	FluB	FluB	FluB	FluB	FluB	H1	H1	H1	H1	H1	H1	H1	H1	-49.33885667816172	0.5437306048275213	-14.927357422156977	0.10544296376590218	0.0	0.0
sequential	FluB	FluB	FluB	FluB	FluB	FluB	FluB	FluB	H1	H1	H1	H1	H1	H1	H1	H1	-49.33885667816172	0.5437306048275213	-14.927357422156977	0.10544296376590218	0.0	0.0
sequential	H3	FluB	FluB	FluB	FluB	FluB	FluB	FluB	H1	H1	H1	H1	H1	H1	H1	H1	-49.33885667816172	0.5437306048275213	-14.927357422156977	0.10544296376590218	0.0	0.0
sequential	H3	H3	H3	FluB	FluB	FluB	FluB	FluB	H1	H1	H1	H1	H1	H1	H1	H1	-49.33885667816172	0.5437306048275213	-14.927357422156977	0.10544296376590218	0.0	0.0
sequential	H3	H3	H3	H3	FluB	FluB	FluB	FluB	H1	H1	H1	H1	H1	H1	H1	H1	-49.33885667816172	0.5437306048275213	-14.927357422156977	0.10544296376590218	0.0	0.0
sequential	FluB	FluB	FluB	FluB	FluB	FluB	H3	H3	H3	H3	H1	H1	H1	H1	H1	H1	-49.37951124119679	0.9649722413399023	-14.878776196654007	0.10670094201622991	0.0	0.0
sequential	FluB	FluB	FluB	FluB	FluB	FluB	FluB	H3	H3	H3	H3	H1	H1	H1	H1	H1	-49.39184949507434	1.0007456415302134	-14.687732871837	0.10477735959082089	0.0	0.0
sequential	H3	H3	H3	H3	H3	H3	FluB	FluB	FluB	FluB	FluB	FluB	FluB	FluB	H1	H1	-49.47415288652944	1.7772875476119137	-15.904017112772046	0.10739428029686236	0.0	0.0
sequential	FluB	FluB	FluB	FluB	FluB	FluB	FluB	FluB	FluB	H1	H1	H1	H1	H1	H1	H3	-49.499174837868914	0.10431635029178947	-13.45702670184425	0.04284859854184844	0.0	0.0
sequential	H1	FluB	FluB	FluB	FluB	FluB	FluB	FluB	FluB	FluB	FluB	FluB	FluB	FluB	FluB	H3	-49.61787454476323	0.6135557780369976	-13.689133437122516	0.1756592819817897	0.0	0.0
sequential	H1	H3	H3	H3	H3	H3	FluB	FluB	FluB	FluB	FluB	FluB	FluB	FluB	FluB	FluB	-49.946233908471676	2.874602338433329	-14.229012688791492	0.23488121803403128	0.0	0.0
sequential	H1	H1	H3	H3	H3	FluB	FluB	FluB	FluB	FluB	FluB	FluB	FluB	FluB	FluB	FluB	-50.043326140854695	2.8363627628642565	-14.081729141578526	0.22189306346718468	0.0	0.0
sequential	FluB	FluB	FluB	FluB	FluB	FluB	FluB	FluB	FluB	H3	H3	H3	H3	H3	H1	H1	-50.05933935887417	0.5977543680615272	-13.458723308199042	0.11538557414808999	0.0	0.0
sequential	H3	H3	H3	H3	H3	H3	H3	FluB	FluB	FluB	FluB	FluB	FluB	FluB	FluB	FluB	-50.12530557575777	3.0081848137521487	-15.076903165398182	0.109403971875761	0.0	0.0
sequential	FluB	FluB	FluB	FluB	FluB	FluB	FluB	FluB	FluB	FluB	H1	H1	H3	H3	H3	H3	-50.12925082731688	0.1641693243809058	-12.106036297091764	0.12353812857561929	0.0	0.0
sequential	FluB	FluB	FluB	FluB	FluB	FluB	FluB	FluB	FluB	FluB	H1	H3	H3	H3	H3	H3	-50.24317883937362	0.33491845632292966	-12.265414168295235	0.13977501039631968	0.0	0.0
sequential	FluB	FluB	FluB	FluB	FluB	FluB	FluB	FluB	FluB	FluB	H1	H1	H1	H3	H3	H3	-50.301113435649604	0.1680027718740097	-12.192513058717733	0.09571587171391276	0.0	0.0
sequential	H3	H3	H3	H3	H3	H3	H3	H3	FluB	H1	H1	H1	H1	H1	H1	H1	-50.480247620723524	0.7921001218928188	-15.051100494787994	0.10578491682401635	0.0	0.0
sequential	H3	H3	H3	H3	H3	H3	H1	H1	FluB	FluB	FluB	FluB	FluB	FluB	FluB	FluB	-50.48163557604049	2.6084274046718776	-14.173353485798243	0.10806629822885519	0.0	0.0
sequential	FluB	FluB	FluB	FluB	FluB	FluB	FluB	FluB	H3	H3	H3	H3	H1	H1	H1	H1	-50.56543985875342	0.9334865444723146	-14.440198091014192	0.1058242482954074	0.0	0.0
sequential	FluB	FluB	FluB	FluB	FluB	FluB	FluB	FluB	FluB	FluB	H3	H3	H3	H3	H3	H3	-50.768853963129615	0.25610711053703006	-12.57828768915126	0.1526181172134509	0.0	0.0
sequential	FluB	FluB	FluB	FluB	FluB	FluB	FluB	FluB	FluB	FluB	FluB	FluB	H1	H3	H3	H3	-50.7913986249924	0.9895392147833338	-13.112861534929007	0.10084647840511213	0.0	0.0
sequential	H3	H3	H3	H3	H3	H3	FluB	FluB	FluB	FluB	FluB	FluB	H1	H1	H1	H1	-50.874150927317764	2.0382904702567513	-16.057012869107442	0.1010842450639185	0.0	0.0
sequential	H3	H3	H3	H3	H3	H3	FluB	FluB	FluB	FluB	FluB	FluB	FluB	FluB	FluB	H1	-50.8782666110647	1.4605173073000022	-15.411500788659195	0.12391628827513848	0.0	0.0
sequential	FluB	FluB	FluB	FluB	FluB	FluB	FluB	FluB	FluB	FluB	FluB	FluB	H3	H3	H3	H3	-50.88546473756346	0.46296748776121077	-13.149108435730758	0.12804957199238756	0.0	0.0
sequential	FluB	FluB	FluB	FluB	FluB	FluB	FluB	FluB	FluB	FluB	FluB	H1	H3	H3	H3	H3	-51.06900441853424	0.5517425229506273	-12.62201862692793	0.12201039825574518	0.0	0.0
sequential	FluB	FluB	FluB	FluB	FluB	FluB	FluB	FluB	FluB	FluB	H1	H1	H1	H1	H3	H3	-51.16896163699003	0.13112002618690335	-12.633849812220221	0.07500216302133339	0.0	0.0
sequential	FluB	FluB	FluB	FluB	FluB	FluB	FluB	FluB	FluB	FluB	FluB	H3	H3	H3	H3	H1	-51.353971397115075	1.285199128148755	-13.396759699708118	0.08998526033540165	0.0	0.0
sequential	H3	H3	H3	H3	H3	H3	FluB	FluB	FluB	FluB	FluB	FluB	FluB	H1	H1	H1	-51.35413398183764	1.345456426050317	-16.214318203334667	0.10680444564697049	0.0	0.0
sequential	FluB	FluB	FluB	FluB	FluB	FluB	FluB	FluB	FluB	FluB	FluB	FluB	H3	H3	H3	H1	-51.53165969086425	1.2382426144350742	-13.838347608219124	0.0900641246065474	0.0	0.0
sequential	FluB	FluB	FluB	FluB	FluB	FluB	FluB	FluB	FluB	FluB	H3	H3	H3	H3	H3	H1	-51.73678028200082	0.8956860969569973	-13.057565114475898	0.09170747157467335	0.0	0.0
sequential	FluB	FluB	FluB	FluB	FluB	FluB	FluB	FluB	FluB	FluB	FluB	H3	H3	H3	H3	H3	-51.81059858998862	0.8137885483132823	-12.820463984855209	0.14231707372074853	0.0	0.0
sequential	FluB	FluB	FluB	FluB	FluB	FluB	H3	H3	H3	H1	H1	H1	H1	H1	H1	H1	-51.92266281128118	0.8070793457403149	-14.949308085411007	0.10583856765631572	0.0	0.0
sequential	FluB	FluB	FluB	FluB	FluB	FluB	FluB	FluB	FluB	FluB	FluB	FluB	FluB	FluB	H3	H3	-52.121842183420455	1.2413265023216167	-14.117897144500363	0.11555121050095106	0.0	0.0
sequential	FluB	FluB	FluB	FluB	FluB	FluB	FluB	FluB	FluB	H3	H3	H3	H3	H1	H1	H1	-52.1927080290161	0.8025741340437815	-14.099896930691212	0.11276608614526606	0.0	0.0
sequential	FluB	FluB	FluB	FluB	FluB	FluB	FluB	FluB	FluB	FluB	FluB	H1	H1	H3	H3	H3	-52.243251617565775	0.7880576870080259	-12.591978533232858	0.09473041515901645	0.0	0.0
sequential	H3	H3	H3	H3	H3	H3	H1	FluB	FluB	FluB	FluB	FluB	FluB	FluB	FluB	FluB	-52.26089177961775	2.951866149037082	-14.612507561094079	0.10647114505463044	0.0	0.0
sequential	H3	H3	H3	H3	H3	H3	H3	FluB	FluB	FluB	H1	H1	H1	H1	H1	H1	-52.29908989750329	1.8435766641043978	-15.39273503528453	0.10526192380855694	0.0	0.0
sequential	FluB	FluB	FluB	FluB	FluB	FluB	FluB	FluB	FluB	FluB	FluB	FluB	FluB	FluB	H1	H3	-52.43972333092942	1.733936766317252	-14.74070307965418	0.07993333926909613	0.0	0.0
sequential	H3	H3	H3	H3	H3	H1	H1	FluB	FluB	FluB	FluB	FluB	FluB	FluB	FluB	FluB	-52.755918319266705	2.663661217556055	-14.195680613494536	0.10678834867329294	0.0	0.0
sequential	H3	H3	H3	H3	H3	H3	H3	FluB	FluB	H1	H1	H1	H1	H1	H1	H1	-52.794672982725025	0.5516747921265371	-15.1274153012324	0.10560066661731013	0.0	0.0
sequential	FluB	FluB	FluB	FluB	FluB	FluB	FluB	H3	H3	H1	H1	H1	H1	H1	H1	H1	-52.84756721072781	0.5507051629741436	-15.01579577442433	0.10594706990757045	0.0	0.0
sequential	H3	H1	H1	FluB	FluB	FluB	FluB	FluB	FluB	FluB	FluB	FluB	FluB	FluB	FluB	FluB	-52.86460573132621	2.6515795730267158	-14.493367950695127	0.1530625313661152	0.0	0.0
sequential	H3	H3	H3	H3	H3	H3	FluB	FluB	FluB	H1	H1	H1	H1	H1	H1	H1	-52.88111657517429	0.5342129990516562	-15.157885206866931	0.1053628026720693	0.0	0.0
sequential	FluB	FluB	FluB	FluB	FluB	FluB	FluB	FluB	H3	H1	H1	H1	H1	H1	H1	H1	-52.88145404205447	0.534098185485018	-15.094717234474933	0.10571589212376137	0.0	0.0
sequential	H3	H3	H3	H3	H3	FluB	FluB	FluB	FluB	H1	H1	H1	H1	H1	H1	H1	-52.88192049048324	0.5338344983595993	-15.166554990997694	0.10547542014620406	0.0	0.0
sequential	FluB	FluB	FluB	FluB	FluB	FluB	FluB	FluB	FluB	H1	H1	H1	H1	H1	H1	H1	-52.88192620212471	0.5338316309780152	-15.168210089176482	0.10543177180793178	0.0	0.0
sequential	H3	H3	H3	H3	FluB	FluB	FluB	FluB	FluB	H1	H1	H1	H1	H1	H1	H1	-52.88192620212471	0.5338316309780152	-15.168210089176482	0.10543177180793178	0.0	0.0
sequential	H3	H3	H3	FluB	FluB	FluB	FluB	FluB	FluB	H1	H1	H1	H1	H1	H1	H1	-52.88192620212471	0.5338316309780152	-15.168210089176482	0.10543177180793178	0.0	0.0
sequential	H3	H3	FluB	FluB	FluB	FluB	FluB	FluB	FluB	H1	H1	H1	H1	H1	H1	H1	-52.88192620212471	0.5338316309780152	-15.168210089176482	0.10543177180793178	0.0	0.0
sequential	H3	FluB	FluB	FluB	FluB	FluB	FluB	FluB	FluB	H1	H1	H1	H1	H1	H1	H1	-52.88192620212471	0.5338316309780152	-15.168210089176482	0.10543177180793178	0.0	0.0
sequential	FluB	FluB	FluB	FluB	FluB	FluB	FluB	FluB	FluB	FluB	FluB	FluB	H1	H1	H3	H3	-52.93178589208272	1.726054567477845	-13.391395054316217	0.08004373970447591	0.0	0.0
sequential	H3	H3	H3	H3	H1	H1	FluB	FluB	FluB	FluB	FluB	FluB	FluB	FluB	FluB	FluB	-52.99159744321531	2.4905673459278126	-14.196362803834415	0.1087092556942825	0.0	0.0
sequential	FluB	FluB	FluB	FluB	FluB	FluB	FluB	H3	H3	H3	H1	H1	H1	H1	H1	H1	-53.06152766123164	0.9722110227178555	-14.991929721730324	0.10658897734252236	0.0	0.0
sequential	FluB	FluB	FluB	FluB	FluB	FluB	FluB	FluB	FluB	FluB	FluB	FluB	FluB	H3	H3	H3	-53.06181140689644	0.8572170630469197	-13.579055273583869	0.10621383351489355	0.0	0.0
sequential	H3	H3	H3	H1	H1	FluB	FluB	FluB	FluB	FluB	FluB	FluB	FluB	FluB	FluB	FluB	-53.06536880880793	2.4918077662596243	-14.25525461200835	0.10707195639296894	0.0	0.0
sequential	FluB	FluB	FluB	FluB	FluB	FluB	FluB	FluB	FluB	FluB	H1	H1	H1	H1	H1	H3	-53.09149323668919	0.07960650887794547	-13.702307193220777	0.04173410594539314	0.0	0.0
sequential	H3	H3	H1	H1	FluB	FluB	FluB	FluB	FluB	FluB	FluB	FluB	FluB	FluB	FluB	FluB	-53.2123431087555	2.405829097804605	-14.288387037421877	0.11961995135510102	0.0	0.0
sequential	FluB	FluB	FluB	FluB	FluB	FluB	FluB	FluB	FluB	FluB	FluB	FluB	FluB	H3	H3	H1	-53.22657630948827	1.6382451593319847	-14.42221278014905	0.09473528225032822	0.0	0.0
sequential	H1	H1	H3	H3	FluB	FluB	FluB	FluB	FluB	FluB	FluB	FluB	FluB	FluB	FluB	FluB	-53.26812658246441	2.1954505585624395	-14.100461499284062	0.221714297038481	0.0	0.0
sequential	H1	H1	FluB	FluB	FluB	FluB	FluB	FluB	FluB	FluB	FluB	FluB	FluB	FluB	FluB	FluB	-53.26812658246441	2.1954505585624395	-14.100461499284062	0.221714297038481	0.0	0.0
sequential	H1	H1	H3	FluB	FluB	FluB	FluB	FluB	FluB	FluB	FluB	FluB	FluB	FluB	FluB	FluB	-53.26812658246441	2.1954505585624395	-14.100461499284062	0.221714297038481	0.0	0.0
sequential	FluB	FluB	FluB	FluB	FluB	FluB	FluB	FluB	FluB	FluB	H3	H3	H3	H3	H1	H1	-53.411438453327676	0.7495727392879569	-13.773906819556139	0.11285930842178526	0.0	0.0
sequential	FluB	FluB	FluB	FluB	FluB	FluB	FluB	FluB	FluB	FluB	FluB	H3	H3	H3	H1	H1	-53.46705130591259	0.8574322806012772	-14.192194124461816	0.10884341950473458	0.0	0.0
sequential	FluB	FluB	FluB	FluB	FluB	FluB	FluB	FluB	FluB	FluB	FluB	FluB	H3	H3	H1	H1	-53.537735411341906	0.8836910032150602	-14.733713289448081	0.10891307640420125	0.0	0.0
sequential	FluB	FluB	FluB	FluB	FluB	FluB	FluB	FluB	H3	H3	H3	H1	H1	H1	H1	H1	-53.54462063265475	0.9878313021598767	-14.904112449091894	0.1038553327823354	0.0	0.0
sequential	FluB	FluB	FluB	FluB	FluB	FluB	FluB	FluB	FluB	FluB	FluB	FluB	FluB	H1	H3	H3	-53.71327450556204	0.849526723116116	-13.847783271898022	0.08227757957932785	0.0	0.0
sequential	H3	H3	H3	H3	H3	H3	FluB	FluB	FluB	FluB	FluB	H1	H1	H1	H1	H1	-54.12162087217443	1.6073527558170468	-15.726260046452538	0.10186144600681789	0.0	0.0
sequential	FluB	FluB	FluB	FluB	FluB	FluB	FluB	FluB	FluB	FluB	FluB	H1	H1	H1	H3	H3	-54.23322025834718	1.262979089085753	-12.914251384177923	0.07724288635284592	0.0	0.0
sequential	H3	H3	H3	H3	H3	FluB	FluB	FluB	FluB	FluB	FluB	FluB	FluB	FluB	H1	H1	-54.33806870126139	1.79833627214461	-15.963946826149298	0.1089986041129893	0.0	0.0
sequential	FluB	FluB	FluB	FluB	FluB	FluB	FluB	FluB	FluB	FluB	FluB	FluB	FluB	FluB	H3	H1	-54.39132167068145	1.422105666735789	-15.031414100977498	0.08888590681633045	0.0	0.0
sequential	FluB	FluB	FluB	FluB	FluB	FluB	FluB	FluB	FluB	FluB	FluB	FluB	H1	H1	H1	H3	-54.63115117753166	0.7869248177156232	-14.379855237048494	0.04089585516632445	0.0	0.0
sequential	H1	H3	H3	H3	H3	FluB	FluB	FluB	FluB	FluB	FluB	FluB	FluB	FluB	FluB	FluB	-54.647600431362676	2.814969562821382	-14.281914793799281	0.23573128883898065	0.0	0.0
sequential	FluB	FluB	FluB	FluB	FluB	FluB	FluB	FluB	FluB	FluB	FluB	FluB	FluB	H1	H1	H3	-54.81170396352838	1.0543066491096182	-14.709238779982822	0.04485658226423329	0.0	0.0
sequential	FluB	FluB	FluB	FluB	FluB	FluB	FluB	FluB	FluB	FluB	FluB	FluB	FluB	FluB	FluB	H3	-54.81706889547656	0.5653412254585259	-14.628436923497226	0.09549614740952983	0.0	0.0
sequential	FluB	FluB	FluB	FluB	FluB	FluB	FluB	FluB	FluB	H3	H3	H3	H1	H1	H1	H1	-54.81959485244395	0.9005076825703441	-14.761269598006933	0.10442269134727589	0.0	0.0
sequential	H3	H3	H3	H3	H3	H3	FluB	FluB	FluB	FluB	FluB	FluB	FluB	FluB	FluB	FluB	-55.4087050253865	2.93935472198575	-15.208372227016039	0.10544134994482428	0.0	0.0
sequential	H3	H3	H3	H3	H3	FluB	FluB	FluB	FluB	FluB	FluB	FluB	FluB	FluB	FluB	H1	-55.711155843319624	1.3867348944125055	-15.468582595211467	0.12453798791267268	0.0	0.0
sequential	H3	H3	H3	H3	H3	FluB	FluB	FluB	FluB	FluB	FluB	FluB	H1	H1	H1	H1	-55.77167709671651	2.0229554840609603	-16.093951976706585	0.10180296340542017	0.0	0.0
sequential	FluB	FluB	FluB	FluB	FluB	FluB	FluB	FluB	FluB	FluB	FluB	H3	H3	H1	H1	H1	-56.0583960554581	1.391245747427861	-14.99723679226569	0.10867525566168404	0.0	0.0
sequential	FluB	FluB	FluB	FluB	FluB	FluB	FluB	FluB	H3	H3	H1	H1	H1	H1	H1	H1	-56.061854644555126	0.7153339591789419	-15.143052224666343	0.10579481116999012	0.0	0.0
sequential	FluB	FluB	FluB	FluB	FluB	FluB	FluB	FluB	FluB	FluB	H3	H3	H3	H1	H1	H1	-56.114542857886	0.9113417757174515	-14.487270925024287	0.11200456466774468	0.0	0.0
sequential	H3	H3	H3	H3	H3	H3	FluB	FluB	FluB	FluB	H1	H1	H1	H1	H1	H1	-56.215046039728776	0.8708483087315209	-15.438430751040048	0.10478155227444966	0.0	0.0
sequential	H3	H3	H3	H3	H3	FluB	FluB	FluB	FluB	FluB	FluB	FluB	FluB	H1	H1	H1	-56.30972739667902	1.3479402255163457	-16.266139732706222	0.10746626517927824	0.0	0.0
sequential	FluB	FluB	FluB	FluB	FluB	FluB	FluB	FluB	FluB	FluB	FluB	FluB	H3	H1	H1	H1	-56.370062043777146	1.3545222572099578	-15.617205757916002	0.10986802342286556	0.0	0.0
sequential	FluB	FluB	FluB	FluB	FluB	FluB	FluB	FluB	FluB	FluB	FluB	FluB	FluB	H3	H1	H1	-56.3925838300195	1.1197696132864754	-15.425239136352614	0.1094065357162594	0.0	0.0
sequential	H3	H3	H3	H3	H3	H1	FluB	FluB	FluB	FluB	FluB	FluB	FluB	FluB	FluB	FluB	-56.425880676737094	2.808997904094205	-14.625747277872783	0.10586977897789573	0.0	0.0
sequential	FluB	FluB	FluB	FluB	FluB	FluB	FluB	FluB	FluB	FluB	FluB	H1	H1	H1	H1	H3	-56.481354171691926	0.20634563975102105	-13.957339437351864	0.04638204970154996	0.0	0.0
sequential	FluB	FluB	FluB	FluB	FluB	FluB	FluB	FluB	FluB	H3	H1	H1	H1	H1	H1	H1	-56.496232908408686	0.5382754348828409	-15.30969673011542	0.10512186500851141	0.0	0.0
sequential	H3	H3	H3	H3	H3	FluB	FluB	FluB	FluB	FluB	H1	H1	H1	H1	H1	H1	-56.50098481092164	0.5379059462958193	-15.451373765489354	0.10490717934462343	0.0	0.0
sequential	H3	H3	FluB	FluB	FluB	FluB	FluB	FluB	FluB	FluB	H1	H1	H1	H1	H1	H1	-56.503263846705686	0.5349463168886083	-15.453863886751739	0.10483752128296961	0.0	0.0
sequential	FluB	FluB	FluB	FluB	FluB	FluB	FluB	FluB	FluB	FluB	H1	H1	H1	H1	H1	H1	-56.503263846705686	0.5349463168886083	-15.453863886751739	0.10483752128296961	0.0	0.0
sequential	H3	H3	H3	H3	FluB	FluB	FluB	FluB	FluB	FluB	H1	H1	H1	H1	H1	H1	-56.503263846705686	0.5349463168886083	-15.453863886751739	0.10483752128296961	0.0	0.0
sequential	H3	H3	H3	FluB	FluB	FluB	FluB	FluB	FluB	FluB	H1	H1	H1	H1	H1	H1	-56.503263846705686	0.5349463168886083	-15.453863886751739	0.10483752128296961	0.0	0.0
sequential	H3	FluB	FluB	FluB	FluB	FluB	FluB	FluB	FluB	FluB	H1	H1	H1	H1	H1	H1	-56.503263846705686	0.5349463168886083	-15.453863886751739	0.10483752128296961	0.0	0.0
sequential	H3	FluB	FluB	FluB	FluB	FluB	FluB	FluB	FluB	FluB	FluB	FluB	FluB	FluB	H1	H1	-57.27343319350735	1.7447420307378108	-15.976469064422773	0.10869040561999507	0.0	0.0
sequential	H3	H3	H3	H3	FluB	FluB	FluB	FluB	FluB	FluB	FluB	FluB	FluB	FluB	H1	H1	-57.27343319350735	1.7447420307378108	-15.976469064422773	0.10869040561999507	0.0	0.0
sequential	FluB	FluB	FluB	FluB	FluB	FluB	FluB	FluB	FluB	FluB	FluB	FluB	FluB	FluB	H1	H1	-57.27343319350735	1.7447420307378108	-15.976469064422773	0.10869040561999507	0.0	0.0
sequential	H3	H3	FluB	FluB	FluB	FluB	FluB	FluB	FluB	FluB	FluB	FluB	FluB	FluB	H1	H1	-57.27343319350735	1.7447420307378108	-15.976469064422773	0.10869040561999507	0.0	0.0
sequential	H3	H3	H3	FluB	FluB	FluB	FluB	FluB	FluB	FluB	FluB	FluB	FluB	FluB	H1	H1	-57.27343319350735	1.7447420307378108	-15.976469064422773	0.10869040561999507	0.0	0.0
sequential	H3	H1	FluB	FluB	FluB	FluB	FluB	FluB	FluB	FluB	FluB	FluB	FluB	FluB	FluB	FluB	-57.68996210503533	2.5076806140858827	-14.842212316926847	0.13065601839122437	0.0	0.0
sequential	H1	FluB	FluB	FluB	FluB	FluB	FluB	FluB	FluB	FluB	FluB	FluB	FluB	FluB	FluB	FluB	-57.722211668078806	2.1359747081366227	-14.293414480546817	0.23576055333084123	0.0	0.0
sequential	H1	H3	H3	FluB	FluB	FluB	FluB	FluB	FluB	FluB	FluB	FluB	FluB	FluB	FluB	FluB	-57.722211668078806	2.1359747081366227	-14.293414480546817	0.23576055333084123	0.0	0.0
sequential	H1	H3	FluB	FluB	FluB	FluB	FluB	FluB	FluB	FluB	FluB	FluB	FluB	FluB	FluB	FluB	-57.722211668078806	2.1359747081366227	-14.293414480546817	0.23576055333084123	0.0	0.0
sequential	H1	H3	H3	H3	FluB	FluB	FluB	FluB	FluB	FluB	FluB	FluB	FluB	FluB	FluB	FluB	-57.722211668078806	2.1359747081366227	-14.293414480546817	0.23576055333084123	0.0	0.0
sequential	H3	H3	H1	FluB	FluB	FluB	FluB	FluB	FluB	FluB	FluB	FluB	FluB	FluB	FluB	FluB	-57.7649652122038	2.3687048788161866	-14.617620371630721	0.1160734198621045	0.0	0.0
sequential	H3	H3	H3	H3	H1	FluB	FluB	FluB	FluB	FluB	FluB	FluB	FluB	FluB	FluB	FluB	-57.76846904462381	2.389453408772712	-14.619484467932745	0.10584326289611352	0.0	0.0
sequential	FluB	FluB	FluB	FluB	FluB	FluB	FluB	FluB	FluB	H3	H3	H1	H1	H1	H1	H1	-57.82879529576929	0.9248557832281346	-15.182129501866152	0.10303711743530791	0.0	0.0
sequential	H3	H3	H3	H1	FluB	FluB	FluB	FluB	FluB	FluB	FluB	FluB	FluB	FluB	FluB	FluB	-57.85819923402107	2.3638571246308784	-14.663082918092485	0.10679269410741557	0.0	0.0
sequential	FluB	FluB	FluB	FluB	FluB	FluB	FluB	FluB	FluB	FluB	H3	H3	H1	H1	H1	H1	-57.89576423078861	1.1691852546963684	-15.169456103226516	0.10383819778056545	0.0	0.0
sequential	FluB	FluB	FluB	FluB	FluB	FluB	FluB	FluB	FluB	FluB	FluB	H3	H1	H1	H1	H1	-58.08415268887121	1.6023792979864668	-15.646844291670947	0.1013252925424145	0.0	0.0
sequential	FluB	FluB	FluB	FluB	FluB	FluB	FluB	FluB	FluB	FluB	FluB	FluB	FluB	FluB	FluB	H1	-58.66664476590866	1.3446392569696468	-15.480226823016654	0.12408002552265782	0.0	0.0
sequential	H3	H3	H3	FluB	FluB	FluB	FluB	FluB	FluB	FluB	FluB	FluB	FluB	FluB	FluB	H1	-58.66664476590866	1.3446392569696468	-15.480226823016654	0.12408002552265782	0.0	0.0
sequential	H3	H3	H3	H3	FluB	FluB	FluB	FluB	FluB	FluB	FluB	FluB	FluB	FluB	FluB	H1	-58.66664476590866	1.3446392569696468	-15.480226823016654	0.12408002552265782	0.0	0.0
sequential	H3	FluB	FluB	FluB	FluB	FluB	FluB	FluB	FluB	FluB	FluB	FluB	FluB	FluB	FluB	H1	-58.66664476590866	1.3446392569696468	-15.480226823016654	0.12408002552265782	0.0	0.0
sequential	H3	H3	FluB	FluB	FluB	FluB	FluB	FluB	FluB	FluB	FluB	FluB	FluB	FluB	FluB	H1	-58.66664476590866	1.3446392569696468	-15.480226823016654	0.12408002552265782	0.0	0.0
sequential	FluB	FluB	FluB	FluB	FluB	FluB	FluB	FluB	FluB	FluB	FluB	FluB	H1	H1	H1	H1	-58.70454483391255	1.918401800413569	-16.101256370137822	0.10163147799641592	0.0	0.0
sequential	H3	H3	H3	H3	FluB	FluB	FluB	FluB	FluB	FluB	FluB	FluB	H1	H1	H1	H1	-58.70454483391255	1.918401800413569	-16.101256370137822	0.10163147799641592	0.0	0.0
sequential	H3	FluB	FluB	FluB	FluB	FluB	FluB	FluB	FluB	FluB	FluB	FluB	H1	H1	H1	H1	-58.70454483391255	1.918401800413569	-16.101256370137822	0.10163147799641592	0.0	0.0
sequential	H3	H3	FluB	FluB	FluB	FluB	FluB	FluB	FluB	FluB	FluB	FluB	H1	H1	H1	H1	-58.70454483391255	1.918401800413569	-16.101256370137822	0.10163147799641592	0.0	0.0
sequential	H3	H3	H3	FluB	FluB	FluB	FluB	FluB	FluB	FluB	FluB	FluB	H1	H1	H1	H1	-58.70454483391255	1.918401800413569	-16.101256370137822	0.10163147799641592	0.0	0.0
sequential	H3	H3	H3	H3	H3	FluB	FluB	FluB	FluB	FluB	FluB	H1	H1	H1	H1	H1	-58.75599134790294	1.312732001732028	-15.746116863491729	0.10215354343870817	0.0	0.0
sequential	H3	FluB	FluB	FluB	FluB	FluB	FluB	FluB	FluB	FluB	FluB	FluB	FluB	H1	H1	H1	-59.224541147308145	1.282237958356055	-16.276612827941	0.10715444854876005	0.0	0.0
sequential	FluB	FluB	FluB	FluB	FluB	FluB	FluB	FluB	FluB	FluB	FluB	FluB	FluB	H1	H1	H1	-59.224541147308145	1.282237958356055	-16.276612827941	0.10715444854876005	0.0	0.0
sequential	H3	H3	H3	FluB	FluB	FluB	FluB	FluB	FluB	FluB	FluB	FluB	FluB	H1	H1	H1	-59.224541147308145	1.282237958356055	-16.276612827941	0.10715444854876005	0.0	0.0
sequential	H3	H3	H3	H3	FluB	FluB	FluB	FluB	FluB	FluB	FluB	FluB	FluB	H1	H1	H1	-59.224541147308145	1.282237958356055	-16.276612827941	0.10715444854876005	0.0	0.0
sequential	H3	H3	FluB	FluB	FluB	FluB	FluB	FluB	FluB	FluB	FluB	FluB	FluB	H1	H1	H1	-59.224541147308145	1.282237958356055	-16.276612827941	0.10715444854876005	0.0	0.0
sequential	FluB	FluB	FluB	FluB	FluB	FluB	FluB	FluB	FluB	FluB	H3	H1	H1	H1	H1	H1	-59.9613113654427	0.5776749055792361	-15.484688084757444	0.10274472000193657	0.0	0.0
sequential	H3	FluB	FluB	FluB	FluB	FluB	FluB	FluB	FluB	FluB	FluB	H1	H1	H1	H1	H1	-60.025533958252204	0.6156573815739581	-15.750003653040089	0.10204653046388244	0.0	0.0
sequential	H3	H3	H3	FluB	FluB	FluB	FluB	FluB	FluB	FluB	FluB	H1	H1	H1	H1	H1	-60.025533958252204	0.6156573815739581	-15.750003653040089	0.10204653046388244	0.0	0.0
sequential	H3	H3	FluB	FluB	FluB	FluB	FluB	FluB	FluB	FluB	FluB	H1	H1	H1	H1	H1	-60.025533958252204	0.6156573815739581	-15.750003653040089	0.10204653046388244	0.0	0.0
sequential	H3	H3	H3	H3	FluB	FluB	FluB	FluB	FluB	FluB	FluB	H1	H1	H1	H1	H1	-60.025533958252204	0.6156573815739581	-15.750003653040089	0.10204653046388244	0.0	0.0
sequential	FluB	FluB	FluB	FluB	FluB	FluB	FluB	FluB	FluB	FluB	FluB	H1	H1	H1	H1	H1	-60.025533958252204	0.6156573815739581	-15.750003653040089	0.10204653046388244	0.0	0.0
sequential	H3	H3	H3	H3	H3	FluB	FluB	FluB	FluB	FluB	FluB	FluB	FluB	FluB	FluB	FluB	-60.09475723932213	2.885302517606251	-15.248921841306045	0.10471237202422527	0.0	0.0
sequential	H3	H3	H3	H3	FluB	FluB	FluB	FluB	FluB	FluB	FluB	FluB	FluB	FluB	FluB	FluB	-62.866280656408954	2.301366566408945	-15.25727713296362	0.10444032917266301	0.0	0.0
FluB_only	FluB	FluB	FluB	FluB	FluB	FluB	FluB	FluB	FluB	FluB	FluB	FluB	FluB	FluB	FluB	FluB	-62.866280656408954	2.301366566408945	-15.25727713296362	0.10444032917266301	0.0	0.0
sequential	H3	H3	FluB	FluB	FluB	FluB	FluB	FluB	FluB	FluB	FluB	FluB	FluB	FluB	FluB	FluB	-62.866280656408954	2.301366566408945	-15.25727713296362	0.10444032917266301	0.0	0.0
sequential	H3	H3	H3	FluB	FluB	FluB	FluB	FluB	FluB	FluB	FluB	FluB	FluB	FluB	FluB	FluB	-62.866280656408954	2.301366566408945	-15.25727713296362	0.10444032917266301	0.0	0.0
sequential	H3	FluB	FluB	FluB	FluB	FluB	FluB	FluB	FluB	FluB	FluB	FluB	FluB	FluB	FluB	FluB	-62.866280656408954	2.301366566408945	-15.25727713296362	0.10444032917266301	0.0	0.0
