# Supplementary material for: Binding affinity landscapes constrain the evolution of broadly neutralizing anti-influenza antibodies
Source: eLife. 2021 Sep 7;10:e71393. doi: 10.7554/eLife.71393 (PMC8476123; doi:10.7554/eLife.71393)
Supplement: Figure 5—source data 2. — Mean and standard error across 10 bootstrap samples are reported for moderate, weak, and strong selection strengths. [file elife-71393-fig5-data2.csv]

ScenarioType	Ag1	Ag2	Ag3	Ag4	Ag5	Ag6	Ag7	Ag8	Ag9	Ag10	Ag11	MeanLogProb_Moderate	StdErrLogProb_Moderate	MeanLogProb_Weak	StdErrLogProb_Weak	MeanPaths_Strong	StdErrPaths_Strong
sequential	H1	H1	H1	H1	H9	H9	H9	H9	H9	H9	H9	-7.075327738385343	0.37212200636351944	-7.884101956452873	0.10198419127644393	135191.7	41300.0370434324
sequential	H1	H1	H1	H9	H9	H9	H9	H9	H9	H9	H9	-7.326466167553257	0.4084926633332063	-7.940729346167199	0.07567087040545212	107705.4	35781.42507937759
sequential	H1	H1	H1	H1	H1	H9	H9	H9	H9	H9	H9	-7.785895254409702	0.5584822177278783	-7.931012296200355	0.09387459972666766	162012.5	42229.55688259113
sequential	H1	H1	H1	H1	H1	H1	H9	H9	H9	H9	H9	-7.9764533020318025	0.4374565488778361	-8.065696901335066	0.06925649713130919	175671.8	40319.87839157146
sequential	H1	H1	H1	H1	H1	H1	H1	H9	H9	H9	H9	-8.563219859976407	0.6323070215976775	-8.320703081350732	0.07907932831019525	181928.8	39160.89970252357
sequential	H1	H1	H1	H1	H1	H1	H1	H1	H9	H9	H9	-9.73767356141361	0.40101830841144404	-8.688664130517337	0.06285405176960496	186372.7	35028.11928547946
sequential	H1	H1	H9	H9	H9	H9	H9	H9	H9	H9	H9	-9.974329957003087	0.7844624377863205	-8.509556141365207	0.059543364197389266	60248.9	22570.02671415738
mixed_average	average	average	average	average	average	average	average	average	average	average	average	-10.924601538677564	0.3426970704475223	-9.307377335985649	0.035549229523761335
sequential	H1	H1	H1	H1	H1	H1	H1	H1	H1	H9	H9	-11.082049303750585	0.3732521739441022	-9.187943699394221	0.04289740734003383	188468.9	47198.609118984285
mixed_random	random	random	random	random	random	random	random	random	random	random	random	-11.637743948953533	0.1773447055792974	-9.020335745378699	0.02386362033325975	118053.69769999999	11285.407949394455
sequential	H1	H1	H1	H1	H1	H1	H1	H1	H1	H1	H9	-12.2404439678838	0.4408714408400941	-9.802411198891077	0.08501951871536247	145324.1	44082.45918591404
sequential	H1	H9	H9	H9	H9	H9	H9	H9	H9	H9	H9	-12.695078004761697	0.9726469055423195	-9.237316622415058	0.07501655417712122	54340.2	28554.53051346571
H1_only	H1	H1	H1	H1	H1	H1	H1	H1	H1	H1	H1	-13.091651789111477	0.4183046402796841	-10.297139123038322	0.06338277552917056	83845.6	19001.208348710647
sequential	H9	H9	H9	H9	H9	H1	H1	H1	H1	H1	H1	-14.161227568901833	0.37960638235669375	-10.064661494555606	0.06831937512100951	107165.2	28944.558409329915
sequential	H9	H9	H9	H9	H1	H1	H1	H1	H1	H1	H1	-14.704847274182214	0.4121946617270331	-9.964515452797023	0.08408532974664833	107841.0	29542.791341073753
sequential	H9	H9	H9	H9	H9	H9	H1	H1	H1	H1	H1	-14.748610513231352	0.389452641372392	-10.233323181198761	0.07113945946123192	110838.8	27274.713567291183
sequential	H9	H9	H9	H9	H9	H9	H9	H9	H9	H1	H1	-14.80243807573822	0.34709393601025074	-9.773126652565654	0.07583400366598156	80776.4	16736.840131876746
sequential	H9	H9	H9	H9	H9	H9	H9	H9	H1	H1	H1	-15.131430145277342	0.3094294701823227	-9.99738606740723	0.06488596332420454	102222.8	18971.650972496365
sequential	H9	H9	H9	H9	H9	H9	H9	H1	H1	H1	H1	-15.179304690860642	0.337748836859344	-10.198451640948942	0.05933315640715003	101328.0	22053.85916342081
sequential	H9	H9	H9	H9	H9	H9	H9	H9	H9	H9	H1	-15.25467908453628	0.34908689341324994	-9.62202747512264	0.07954554544727985	58634.8	13014.615961380583
sequential	H9	H9	H9	H1	H1	H1	H1	H1	H1	H1	H1	-15.829039884343297	0.39688494510453576	-10.1197771280051	0.0645734870199856	89109.0	20943.48166428453
H9_only	H9	H9	H9	H9	H9	H9	H9	H9	H9	H9	H9	-16.55555964976943	0.82548848034947	-9.472064220447066	0.061769711885024774	54340.2	28554.53051346571
sequential	H9	H1	H1	H1	H1	H1	H1	H1	H1	H1	H1	-16.681197329178804	0.3692266485761543	-10.512129722997614	0.05644702567484578	83845.6	19001.208348710647
sequential	H9	H9	H1	H1	H1	H1	H1	H1	H1	H1	H1	-17.082928290449626	0.48234611894985974	-10.376998419512669	0.07024972371541886	60766.8	18936.599793345515
