# Supplementary material for: Binding affinity landscapes constrain the evolution of broadly neutralizing anti-influenza antibodies
Source: eLife journal article supplement (doi:10.7554/elife.71393), 2021-09-07

**A** CR9114: Mutation order under H1 moderate selection scenario

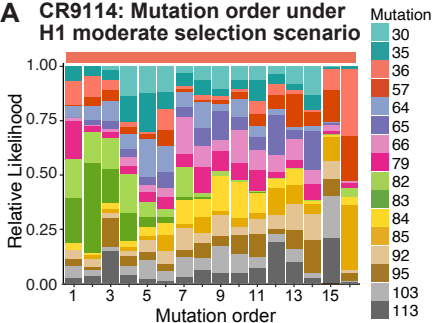

**C** CR6261: Mutation order under 'O' moderate selection scenario

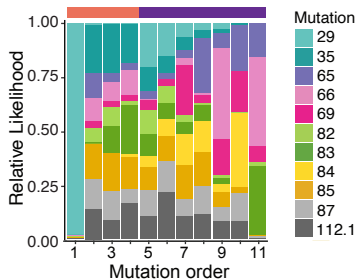

**B** CR9114: Mutation order under 'R' moderate selection scenario

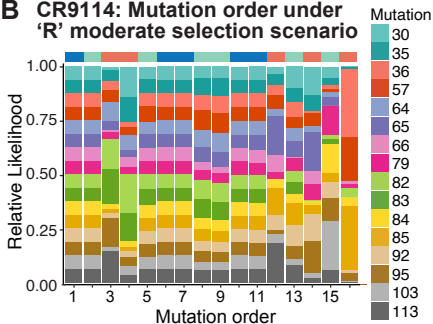

**D** CR6261: Mutation order under 'R' moderate selection scenario

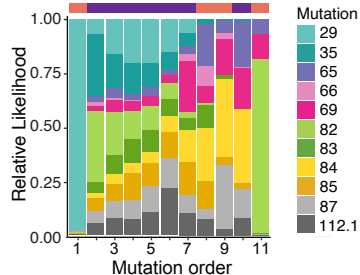

Supplement: supp [file elife-71393-supp-v1.zip]
