# Supplementary material for: Binding affinity landscapes constrain the evolution of broadly neutralizing anti-influenza antibodies
Source: eLife journal article supplement (doi:10.7554/elife.71393), 2021-09-07

1. Gate single cells

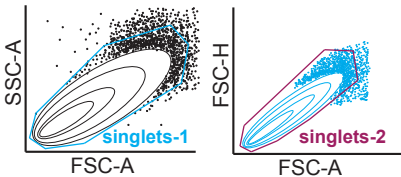

2A. Gate single cells by scFv expression

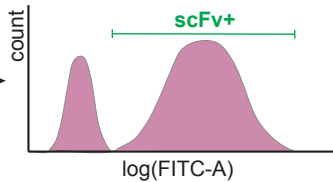

2B. Gate single cells by scFv expression

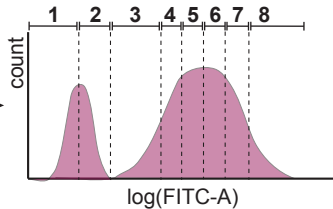

3A. Gate scFv+ cells by HA binding

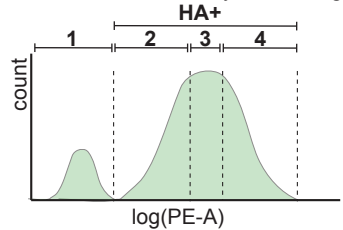

Supplement: supp [file elife-71393-supp-v1.zip]
