# Supplementary material for: Binding affinity landscapes constrain the evolution of broadly neutralizing anti-influenza antibodies
Source: eLife journal article supplement (doi:10.7554/elife.71393), 2021-09-07

**A CR9114 H1: interaction map of 30, 57, 65, 82, and 83**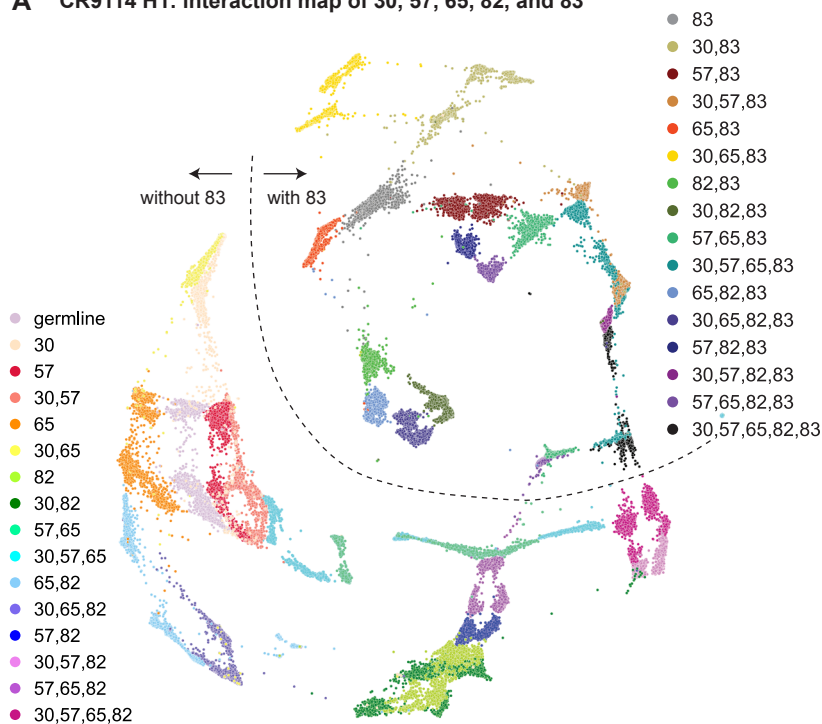**B CR9114 H1: interaction coefficients of 30, 57, 65, 82, and 83**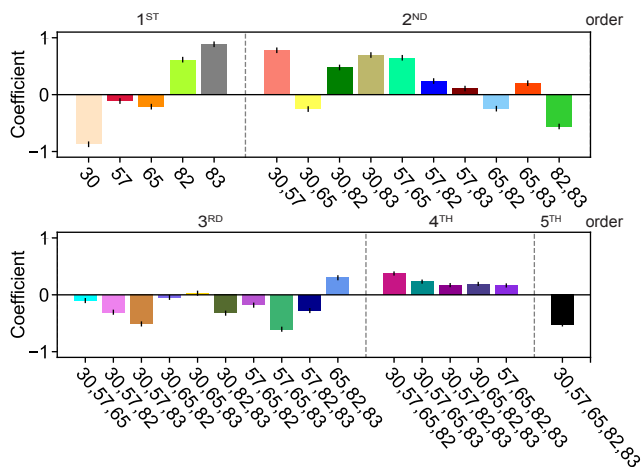**C CR9114 H1: distribution of significant coefficients in 5-mutation groups**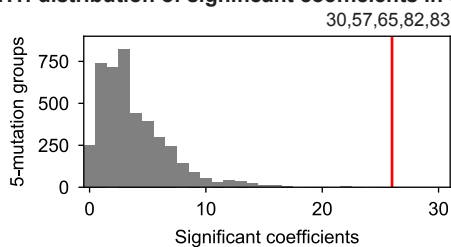

Supplement: supp [file elife-71393-supp-v1.zip]
