# Supplementary material for: Binding affinity landscapes constrain the evolution of broadly neutralizing anti-influenza antibodies
Source: eLife journal article supplement (doi:10.7554/elife.71393), 2021-09-07

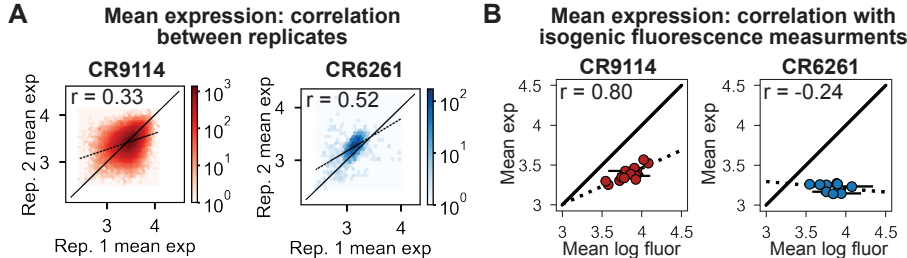

**C** Change in expression by number of mutations

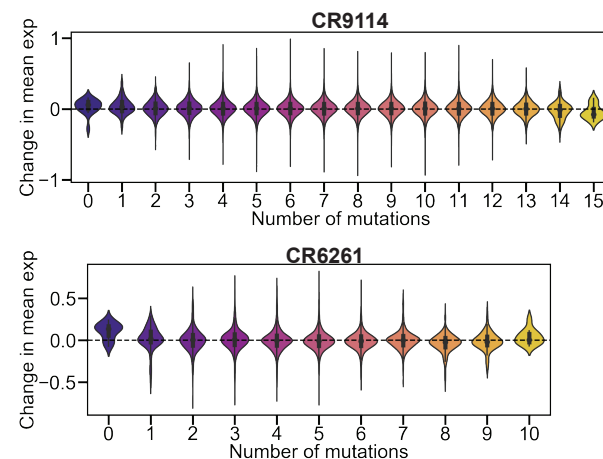

**D** Expression vs. binding affinity by variant

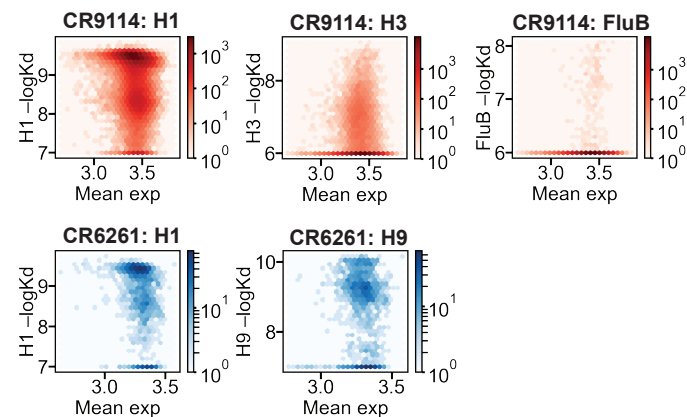

**E** Change in expression by mutation position

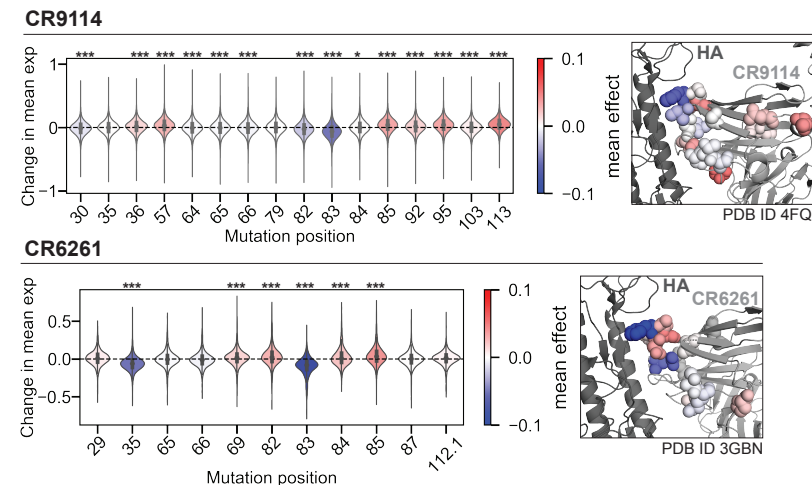

**F** Change in expression vs. change in binding affinity by mutation position

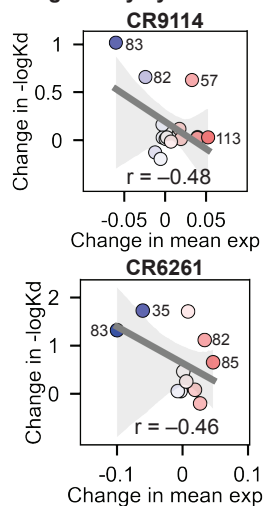

Supplement: supp [file elife-71393-supp-v1.zip]
