# Supplementary material for: Binding affinity landscapes constrain the evolution of broadly neutralizing anti-influenza antibodies
Source: eLife journal article supplement (doi:10.7554/elife.71393), 2021-09-07

**A** CR9114 Tite-seq mean bin  $K_D$  inference: correlation between biological replicates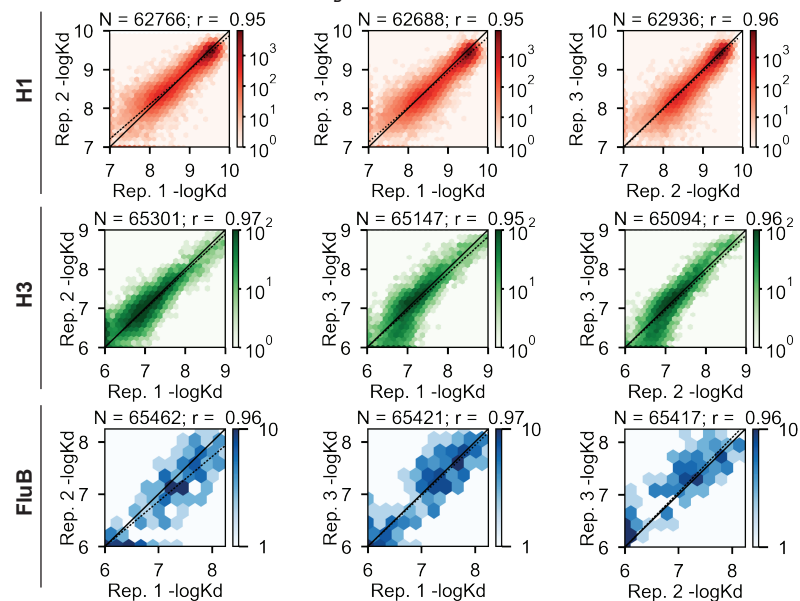**B** CR9114 Isogenic  $K_D$  vs. Tite-Seq mean bin  $K_D$ 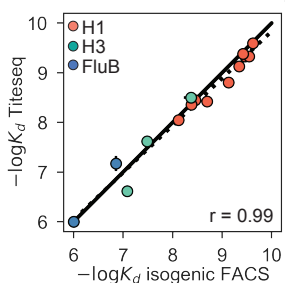**C** CR6261 Tite-seq mean bin  $K_D$  inference: correlation between biological replicates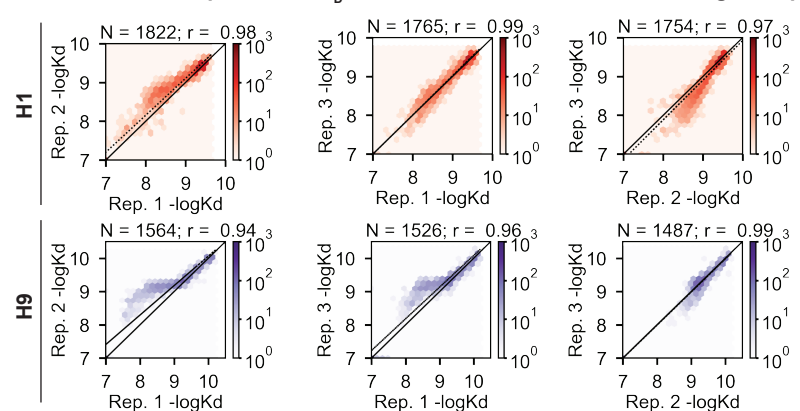**D** CR6261 Isogenic  $K_D$  vs. Tite-Seq mean bin  $K_D$ 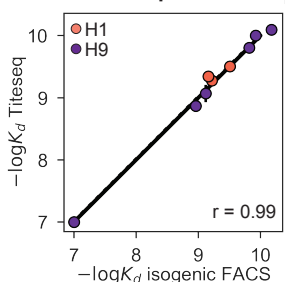

Supplement: supp [file elife-71393-supp-v1.zip]
