# Supplementary material for: Binding affinity landscapes constrain the evolution of broadly neutralizing anti-influenza antibodies
Source: eLife journal article supplement (doi:10.7554/elife.71393), 2021-09-07

## A Experimental design

| Antibody library | Antigen | Antigen % identity<br>(epitope % identity) |
|------------------|---------|--------------------------------------------|
|                  | ×3 rep. |                                            |

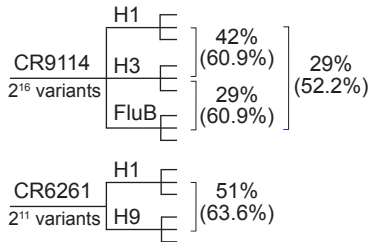

## B Tite-Seq workflow

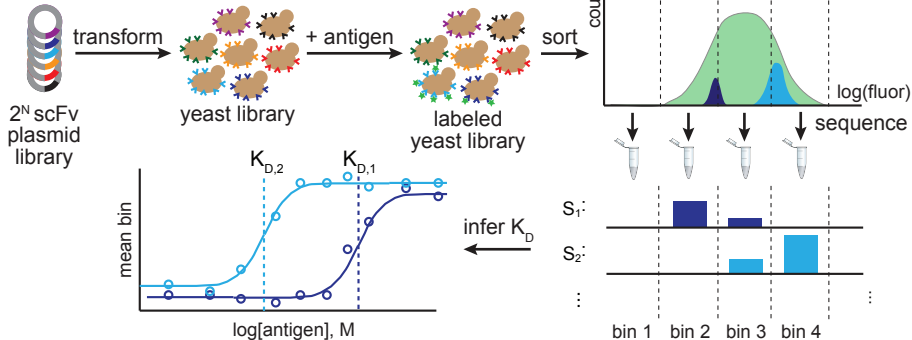

Supplement: supp [file elife-71393-supp-v1.zip]
