# Supplementary material for: Binding affinity landscapes constrain the evolution of broadly neutralizing anti-influenza antibodies
Source: eLife. 2021 Sep 7;10:e71393. doi: 10.7554/eLife.71393 (PMC8476123; doi:10.7554/eLife.71393)
Supplement: Supplementary file 1. [file elife-71393-supp1.xlsx]

## Sheet: CR9114_rnd1_PCR
Name	Overhang: Transposome sequence	Molecular BC	Row/col Index	Annealing to genomic (anneal at 66)	Final
col_1_9114F	TCGTCGGCAGCGTCAGATGTGTATAAGAGACAG	NNNNNNNN	TTGATCG	AAAGCCTCCGGTGGTAC	TCGTCGGCAGCGTCAGATGTGTATAAGAGACAGNNNNNNNNTTGATCGAAAGCCTCCGGTGGTAC
col_2_9114F	TCGTCGGCAGCGTCAGATGTGTATAAGAGACAG	NNNNNNNN	CATTCTCGAG	AAAGCCTCCGGTGGTAC	TCGTCGGCAGCGTCAGATGTGTATAAGAGACAGNNNNNNNNCATTCTCGAGAAAGCCTCCGGTGGTAC
col_3_9114F	TCGTCGGCAGCGTCAGATGTGTATAAGAGACAG	NNNNNNNN	CCTTAGTACTA	AAAGCCTCCGGTGGTAC	TCGTCGGCAGCGTCAGATGTGTATAAGAGACAGNNNNNNNNCCTTAGTACTAAAAGCCTCCGGTGGTAC
col_4_9114F	TCGTCGGCAGCGTCAGATGTGTATAAGAGACAG	NNNNNNNN	AGTGGAATACCT	AAAGCCTCCGGTGGTAC	TCGTCGGCAGCGTCAGATGTGTATAAGAGACAGNNNNNNNNAGTGGAATACCTAAAGCCTCCGGTGGTAC
col_5_9114F	TCGTCGGCAGCGTCAGATGTGTATAAGAGACAG	NNNNNNNN	GGTATCA	AAAGCCTCCGGTGGTAC	TCGTCGGCAGCGTCAGATGTGTATAAGAGACAGNNNNNNNNGGTATCAAAAGCCTCCGGTGGTAC
col_6_9114F	TCGTCGGCAGCGTCAGATGTGTATAAGAGACAG	NNNNNNNN	GATGTCCT	AAAGCCTCCGGTGGTAC	TCGTCGGCAGCGTCAGATGTGTATAAGAGACAGNNNNNNNNGATGTCCTAAAGCCTCCGGTGGTAC
col_7_9114F	TCGTCGGCAGCGTCAGATGTGTATAAGAGACAG	NNNNNNNN	CTCATCCAG	AAAGCCTCCGGTGGTAC	TCGTCGGCAGCGTCAGATGTGTATAAGAGACAGNNNNNNNNCTCATCCAGAAAGCCTCCGGTGGTAC
col_8_9114F	TCGTCGGCAGCGTCAGATGTGTATAAGAGACAG	NNNNNNNN	GACGGAACTC	AAAGCCTCCGGTGGTAC	TCGTCGGCAGCGTCAGATGTGTATAAGAGACAGNNNNNNNNGACGGAACTCAAAGCCTCCGGTGGTAC
col_9_9114F	TCGTCGGCAGCGTCAGATGTGTATAAGAGACAG	NNNNNNNN	ATCGCAGGCAT	AAAGCCTCCGGTGGTAC	TCGTCGGCAGCGTCAGATGTGTATAAGAGACAGNNNNNNNNATCGCAGGCATAAAGCCTCCGGTGGTAC
col_10_9114F	TCGTCGGCAGCGTCAGATGTGTATAAGAGACAG	NNNNNNNN	TCACGACTAGTA	AAAGCCTCCGGTGGTAC	TCGTCGGCAGCGTCAGATGTGTATAAGAGACAGNNNNNNNNTCACGACTAGTAAAAGCCTCCGGTGGTAC
row_1_9114R	GTCTCGTGGGCTCGGAGATGTGTATAAGAGACAG	NNNNNNNN	TACCTGA	GACCCCAGACATCCATACC	GTCTCGTGGGCTCGGAGATGTGTATAAGAGACAGNNNNNNNNTACCTGAGACCCCAGACATCCATACC
row_2_9114R	GTCTCGTGGGCTCGGAGATGTGTATAAGAGACAG	NNNNNNNN	AGAACCAT	GACCCCAGACATCCATACC	GTCTCGTGGGCTCGGAGATGTGTATAAGAGACAGNNNNNNNNAGAACCATGACCCCAGACATCCATACC
row_3_9114R	GTCTCGTGGGCTCGGAGATGTGTATAAGAGACAG	NNNNNNNN	ACCGTTGAC	GACCCCAGACATCCATACC	GTCTCGTGGGCTCGGAGATGTGTATAAGAGACAGNNNNNNNNACCGTTGACGACCCCAGACATCCATACC
row_4_9114R	GTCTCGTGGGCTCGGAGATGTGTATAAGAGACAG	NNNNNNNN	GCAAGCTGTT	GACCCCAGACATCCATACC	GTCTCGTGGGCTCGGAGATGTGTATAAGAGACAGNNNNNNNNGCAAGCTGTTGACCCCAGACATCCATACC
row_5_9114R	GTCTCGTGGGCTCGGAGATGTGTATAAGAGACAG	NNNNNNNN	TCGGTGGTACG	GACCCCAGACATCCATACC	GTCTCGTGGGCTCGGAGATGTGTATAAGAGACAGNNNNNNNNTCGGTGGTACGGACCCCAGACATCCATACC
row_6_9114R	GTCTCGTGGGCTCGGAGATGTGTATAAGAGACAG	NNNNNNNN	GTTCAACCGATT	GACCCCAGACATCCATACC	GTCTCGTGGGCTCGGAGATGTGTATAAGAGACAGNNNNNNNNGTTCAACCGATTGACCCCAGACATCCATACC
row_7_9114R	GTCTCGTGGGCTCGGAGATGTGTATAAGAGACAG	NNNNNNNN	CGTACAA	GACCCCAGACATCCATACC	GTCTCGTGGGCTCGGAGATGTGTATAAGAGACAGNNNNNNNNCGTACAAGACCCCAGACATCCATACC
row_8_9114R	GTCTCGTGGGCTCGGAGATGTGTATAAGAGACAG	NNNNNNNN	GAGATCAC	GACCCCAGACATCCATACC	GTCTCGTGGGCTCGGAGATGTGTATAAGAGACAGNNNNNNNNGAGATCACGACCCCAGACATCCATACC

## Sheet: CR6261_rnd1_PCR
Name	Overhang: Transposome sequence	Molecular BC	Row/col Index	Annealing to genomic (anneal at 66)	Final
col_1_6261F	TCGTCGGCAGCGTCAGATGTGTATAAGAGACAG	NNNNNNNN	TTGATCG	CTTGTAAGGCCAGCGGG	TCGTCGGCAGCGTCAGATGTGTATAAGAGACAGNNNNNNNNTTGATCGCTTGTAAGGCCAGCGGG
col_2_6261F	TCGTCGGCAGCGTCAGATGTGTATAAGAGACAG	NNNNNNNN	CATTCTCGAG	CTTGTAAGGCCAGCGGG	TCGTCGGCAGCGTCAGATGTGTATAAGAGACAGNNNNNNNNCATTCTCGAGCTTGTAAGGCCAGCGGG
col_3_6261F	TCGTCGGCAGCGTCAGATGTGTATAAGAGACAG	NNNNNNNN	CCTTAGTACTA	CTTGTAAGGCCAGCGGG	TCGTCGGCAGCGTCAGATGTGTATAAGAGACAGNNNNNNNNCCTTAGTACTACTTGTAAGGCCAGCGGG
col_4_6261F	TCGTCGGCAGCGTCAGATGTGTATAAGAGACAG	NNNNNNNN	AGTGGAATACCT	CTTGTAAGGCCAGCGGG	TCGTCGGCAGCGTCAGATGTGTATAAGAGACAGNNNNNNNNAGTGGAATACCTCTTGTAAGGCCAGCGGG
col_5_6261F	TCGTCGGCAGCGTCAGATGTGTATAAGAGACAG	NNNNNNNN	GGTATCA	CTTGTAAGGCCAGCGGG	TCGTCGGCAGCGTCAGATGTGTATAAGAGACAGNNNNNNNNGGTATCACTTGTAAGGCCAGCGGG
col_6_6261F	TCGTCGGCAGCGTCAGATGTGTATAAGAGACAG	NNNNNNNN	GATGTCCT	CTTGTAAGGCCAGCGGG	TCGTCGGCAGCGTCAGATGTGTATAAGAGACAGNNNNNNNNGATGTCCTCTTGTAAGGCCAGCGGG
col_7_6261F	TCGTCGGCAGCGTCAGATGTGTATAAGAGACAG	NNNNNNNN	CTCATCCAG	CTTGTAAGGCCAGCGGG	TCGTCGGCAGCGTCAGATGTGTATAAGAGACAGNNNNNNNNCTCATCCAGCTTGTAAGGCCAGCGGG
col_8_6261F	TCGTCGGCAGCGTCAGATGTGTATAAGAGACAG	NNNNNNNN	GACGGAACTC	CTTGTAAGGCCAGCGGG	TCGTCGGCAGCGTCAGATGTGTATAAGAGACAGNNNNNNNNGACGGAACTCCTTGTAAGGCCAGCGGG
col_9_6261F	TCGTCGGCAGCGTCAGATGTGTATAAGAGACAG	NNNNNNNN	ATCGCAGGCAT	CTTGTAAGGCCAGCGGG	TCGTCGGCAGCGTCAGATGTGTATAAGAGACAGNNNNNNNNATCGCAGGCATCTTGTAAGGCCAGCGGG
col_10_6261F	TCGTCGGCAGCGTCAGATGTGTATAAGAGACAG	NNNNNNNN	TCACGACTAGTA	CTTGTAAGGCCAGCGGG	TCGTCGGCAGCGTCAGATGTGTATAAGAGACAGNNNNNNNNTCACGACTAGTACTTGTAAGGCCAGCGGG
row_1_6261R	GTCTCGTGGGCTCGGAGATGTGTATAAGAGACAG	NNNNNNNN	TACCTGA	ccagacatccatCGTCTC	GTCTCGTGGGCTCGGAGATGTGTATAAGAGACAGNNNNNNNNTACCTGAccagacatccatCGTCTC
row_2_6261R	GTCTCGTGGGCTCGGAGATGTGTATAAGAGACAG	NNNNNNNN	AGAACCAT	ccagacatccatCGTCTC	GTCTCGTGGGCTCGGAGATGTGTATAAGAGACAGNNNNNNNNAGAACCATccagacatccatCGTCTC
row_3_6261R	GTCTCGTGGGCTCGGAGATGTGTATAAGAGACAG	NNNNNNNN	ACCGTTGAC	ccagacatccatCGTCTC	GTCTCGTGGGCTCGGAGATGTGTATAAGAGACAGNNNNNNNNACCGTTGACccagacatccatCGTCTC
row_4_6261R	GTCTCGTGGGCTCGGAGATGTGTATAAGAGACAG	NNNNNNNN	GCAAGCTGTT	ccagacatccatCGTCTC	GTCTCGTGGGCTCGGAGATGTGTATAAGAGACAGNNNNNNNNGCAAGCTGTTccagacatccatCGTCTC
row_5_6261R	GTCTCGTGGGCTCGGAGATGTGTATAAGAGACAG	NNNNNNNN	TCGGTGGTACG	ccagacatccatCGTCTC	GTCTCGTGGGCTCGGAGATGTGTATAAGAGACAGNNNNNNNNTCGGTGGTACGccagacatccatCGTCTC
row_6_6261R	GTCTCGTGGGCTCGGAGATGTGTATAAGAGACAG	NNNNNNNN	GTTCAACCGATT	ccagacatccatCGTCTC	GTCTCGTGGGCTCGGAGATGTGTATAAGAGACAGNNNNNNNNGTTCAACCGATTccagacatccatCGTCTC
row_7_6261R	GTCTCGTGGGCTCGGAGATGTGTATAAGAGACAG	NNNNNNNN	CGTACAA	ccagacatccatCGTCTC	GTCTCGTGGGCTCGGAGATGTGTATAAGAGACAGNNNNNNNNCGTACAAccagacatccatCGTCTC
row_8_6261R	GTCTCGTGGGCTCGGAGATGTGTATAAGAGACAG	NNNNNNNN	GAGATCAC	ccagacatccatCGTCTC	GTCTCGTGGGCTCGGAGATGTGTATAAGAGACAGNNNNNNNNGAGATCACccagacatccatCGTCTC

## Sheet: rnd2_PCR
Name	Sequence	Index	Index RC
S501	AATGATACGGCGACCACCGAGATCTACACTAGATCGCTCGTCGGCAGCGTC	TAGATCGC	GCGATCTA
S502	AATGATACGGCGACCACCGAGATCTACACCTCTCTATTCGTCGGCAGCGTC	CTCTCTAT	ATAGAGAG
S503	AATGATACGGCGACCACCGAGATCTACACTATCCTCTTCGTCGGCAGCGTC	TATCCTCT	AGAGGATA
S504	AATGATACGGCGACCACCGAGATCTACACAGAGTAGATCGTCGGCAGCGTC	AGAGTAGA	TCTACTCT
S505	AATGATACGGCGACCACCGAGATCTACACGTAAGGAGTCGTCGGCAGCGTC	GTAAGGAG	CTCCTTAC
S506	AATGATACGGCGACCACCGAGATCTACACACTGCATATCGTCGGCAGCGTC	ACTGCATA	TATGCAGT
S507	AATGATACGGCGACCACCGAGATCTACACAAGGAGTATCGTCGGCAGCGTC	AAGGAGTA	TACTCCTT
S508	AATGATACGGCGACCACCGAGATCTACACCTAAGCCTTCGTCGGCAGCGTC	CTAAGCCT	AGGCTTAG
S509	AATGATACGGCGACCACCGAGATCTACACGGCTACTCTCGTCGGCAGCGTC	GGCTACTC	GAGTAGCC
S510	AATGATACGGCGACCACCGAGATCTACACCCTCAGACTCGTCGGCAGCGTC	CCTCAGAC	GTCTGAGG
S511	AATGATACGGCGACCACCGAGATCTACACTCCTTACGTCGTCGGCAGCGTC	TCCTTACG	CGTAAGGA
S512	AATGATACGGCGACCACCGAGATCTACACACGCGTGGTCGTCGGCAGCGTC	ACGCGTGG	CCACGCGT
S513	AATGATACGGCGACCACCGAGATCTACACGGAACTCCTCGTCGGCAGCGTC	GGAACTCC	GGAGTTCC
S514	AATGATACGGCGACCACCGAGATCTACACTGGCCATGTCGTCGGCAGCGTC	TGGCCATG	CATGGCCA
S515	AATGATACGGCGACCACCGAGATCTACACGAGAGATTTCGTCGGCAGCGTC	GAGAGATT	AATCTCTC
S516	AATGATACGGCGACCACCGAGATCTACACCGCGGTTATCGTCGGCAGCGTC	CGCGGTTA	TAACCGCG
S517	AATGATACGGCGACCACCGAGATCTACACGACCGCCATCGTCGGCAGCGTC	GACCGCCA	TGGCGGTC
S518	AATGATACGGCGACCACCGAGATCTACACTAAGATGGTCGTCGGCAGCGTC	TAAGATGG	CCATCTTA
S519	AATGATACGGCGACCACCGAGATCTACACATTGACATTCGTCGGCAGCGTC	ATTGACAT	ATGTCAAT
S520	AATGATACGGCGACCACCGAGATCTACACAGCCAACTTCGTCGGCAGCGTC	AGCCAACT	AGTTGGCT
S521	AATGATACGGCGACCACCGAGATCTACACTACTAGGTTCGTCGGCAGCGTC	TACTAGGT	ACCTAGTA
S522	AATGATACGGCGACCACCGAGATCTACACTCACGGTTTCGTCGGCAGCGTC	TCACGGTT	AACCGTGA
S523	AATGATACGGCGACCACCGAGATCTACACTGTAATGATCGTCGGCAGCGTC	TGTAATGA	TCATTACA
S524	AATGATACGGCGACCACCGAGATCTACACCACGTCAGTCGTCGGCAGCGTC	CACGTCAG	CTGACGTG
S525	AATGATACGGCGACCACCGAGATCTACACCTGAATTCTCGTCGGCAGCGTC	CTGAATTC	GAATTCAG
S526	AATGATACGGCGACCACCGAGATCTACACCGTACCGGTCGTCGGCAGCGTC	CGTACCGG	CCGGTACG
S527	AATGATACGGCGACCACCGAGATCTACACGATGACGGTCGTCGGCAGCGTC	GATGACGG	CCGTCATC
S528	AATGATACGGCGACCACCGAGATCTACACTATAGACGTCGTCGGCAGCGTC	TATAGACG	CGTCTATA
S529	AATGATACGGCGACCACCGAGATCTACACGTCATTGATCGTCGGCAGCGTC	GTCATTGA	TCAATGAC
S530	AATGATACGGCGACCACCGAGATCTACACGCATCGTTTCGTCGGCAGCGTC	GCATCGTT	AACGATGC
S531	AATGATACGGCGACCACCGAGATCTACACAGGTTGACTCGTCGGCAGCGTC	AGGTTGAC	GTCAACCT
S532	AATGATACGGCGACCACCGAGATCTACACTGAAACTGTCGTCGGCAGCGTC	TGAAACTG	CAGTTTCA
S533	AATGATACGGCGACCACCGAGATCTACACCAATCACATCGTCGGCAGCGTC	CAATCACA	TGTGATTG
S534	AATGATACGGCGACCACCGAGATCTACACACATGCAATCGTCGGCAGCGTC	ACATGCAA	TTGCATGT
S535	AATGATACGGCGACCACCGAGATCTACACATCGCGCCTCGTCGGCAGCGTC	ATCGCGCC	GGCGCGAT
S536	AATGATACGGCGACCACCGAGATCTACACTCGGTTAATCGTCGGCAGCGTC	TCGGTTAA	TTAACCGA
N701	CAAGCAGAAGACGGCATACGAGATTCGCCTTAGTCTCGTGGGCTCGG	TCGCCTTA	TAAGGCGA
N702	CAAGCAGAAGACGGCATACGAGATCTAGTACGGTCTCGTGGGCTCGG	CTAGTACG	CGTACTAG
N703	CAAGCAGAAGACGGCATACGAGATTTCTGCCTGTCTCGTGGGCTCGG	TTCTGCCT	AGGCAGAA
N704	CAAGCAGAAGACGGCATACGAGATGCTCAGGAGTCTCGTGGGCTCGG	GCTCAGGA	TCCTGAGC
N705	CAAGCAGAAGACGGCATACGAGATAGGAGTCCGTCTCGTGGGCTCGG	AGGAGTCC	GGACTCCT
N706	CAAGCAGAAGACGGCATACGAGATCATGCCTAGTCTCGTGGGCTCGG	CATGCCTA	TAGGCATG
N707	CAAGCAGAAGACGGCATACGAGATGTAGAGAGGTCTCGTGGGCTCGG	GTAGAGAG	CTCTCTAC
N708	CAAGCAGAAGACGGCATACGAGATCCTCTCTGGTCTCGTGGGCTCGG	CCTCTCTG	CAGAGAGG
N709	CAAGCAGAAGACGGCATACGAGATAGCGTAGCGTCTCGTGGGCTCGG	AGCGTAGC	GCTACGCT
N710	CAAGCAGAAGACGGCATACGAGATCAGCCTCGGTCTCGTGGGCTCGG	CAGCCTCG	CGAGGCTG
N711	CAAGCAGAAGACGGCATACGAGATTGCCTCTTGTCTCGTGGGCTCGG	TGCCTCTT	AAGAGGCA
N712	CAAGCAGAAGACGGCATACGAGATTCCTCTACGTCTCGTGGGCTCGG	TCCTCTAC	GTAGAGGA
N713	CAAGCAGAAGACGGCATACGAGATATTACAATGTCTCGTGGGCTCGG	ATTACAAT	ATTGTAAT
N714	CAAGCAGAAGACGGCATACGAGATGAATGATCGTCTCGTGGGCTCGG	GAATGATC	GATCATTC
N715	CAAGCAGAAGACGGCATACGAGATCGATCGGTGTCTCGTGGGCTCGG	CGATCGGT	ACCGATCG
N716	CAAGCAGAAGACGGCATACGAGATAATAACGGGTCTCGTGGGCTCGG	AATAACGG	CCGTTATT
N717	CAAGCAGAAGACGGCATACGAGATTAGAAGAAGTCTCGTGGGCTCGG	TAGAAGAA	TTCTTCTA
N718	CAAGCAGAAGACGGCATACGAGATGTCAGGTAGTCTCGTGGGCTCGG	GTCAGGTA	TACCTGAC
N719	CAAGCAGAAGACGGCATACGAGATGCGGTCCTGTCTCGTGGGCTCGG	GCGGTCCT	AGGACCGC
N720	CAAGCAGAAGACGGCATACGAGATAATCGGACGTCTCGTGGGCTCGG	AATCGGAC	GTCCGATT
N721	CAAGCAGAAGACGGCATACGAGATAACTCGTGGTCTCGTGGGCTCGG	AACTCGTG	CACGAGTT
N722	CAAGCAGAAGACGGCATACGAGATGGCCGTGGGTCTCGTGGGCTCGG	GGCCGTGG	CCACGGCC
N723	CAAGCAGAAGACGGCATACGAGATTTACATGTGTCTCGTGGGCTCGG	TTACATGT	ACATGTAA
N724	CAAGCAGAAGACGGCATACGAGATAGTTAACAGTCTCGTGGGCTCGG	AGTTAACA	TGTTAACT
