# Supplementary material for: Binding affinity landscapes constrain the evolution of broadly neutralizing anti-influenza antibodies
Source: eLife. 2021 Sep 7;10:e71393. doi: 10.7554/eLife.71393 (PMC8476123; doi:10.7554/eLife.71393)
Supplement: Supplementary file 2. [file elife-71393-supp2.xlsx]

## Sheet: CR9114_library_duplexes
Well	Duplex Name	Sense Sequence Name	Sense Sequence	Antisense Name	Antisense sequence
A1	f1	f1	ATCGACGGTCTCCGGTACCTTTTCTTCCTACGCCATAAGCTGGGTAAGGCAGGCCCCGGGGCAGGGTGAGACCAGTAGC	f1_rc	GCTACTGGTCTCACCCTGCCCCGGGGCCTGCCTTACCCAGCTTATGGCGTAGGAAGAAAAGGTACCGGAGACCGTCGAT
A2	f2	f2	ATCGACGGTCTCGAGGGCTTGGAGTGGATGGGCGGCATCATCCCCATATTCGGCACCGCGAATTATGCACAgCGAGACCAGTAGC	f2_rc	GCTACTGGTCTCGcTGTGCATAATTCGCGGTGCCGAATATGGGGATGATGCCGCCCATCCACTCCAAGCCCTCGAGACCGTCGAT													A10	A11	A12
A3	f2_T57S_A58T	f2_T57S_A58T	ATCGACGGTCTCGAGGGCTTGGAGTGGATGGGCGGCATCATCCCCATATTCGGCtctacaAATTATGCACAgCGAGACCAGTAGC	f2_T57S_A58T_rc	GCTACTGGTCTCGcTGTGCATAATTtgtagaGCCGAATATGGGGATGATGCCGCCCATCCACTCCAAGCCCTCGAGACCGTCGAT													B10	B11	B12
A4	f3	f3	ATCGACGGTCTCGACAgAAATTTCAAGGGAGAGTAACGATCACCGCGGACAAGAGCACTTCCACAGCTTCGAGACCAGTAGC	f3_rc	GCTACTGGTCTCGAAGCTGTGGAAGTGCTCTTGTCCGCGGTGATCGTTACTCTCCCTTGAAATTTcTGTCGAGACCGTCGAT												C9	C10	C11	C12
A5	f3_T71S_T76S	f3_T71S_T76S	ATCGACGGTCTCGACAgAAATTTCAAGGGAGAGTAACGATCtctGCGGACAAGAGCtccTCCACAGCTTCGAGACCAGTAGC	f3_T71S_T76S_rc	GCTACTGGTCTCGAAGCTGTGGAggaGCTCTTGTCCGCagaGATCGTTACTCTCCCTTGAAATTTcTGTCGAGACCGTCGAT												D9	D10	D11	D12
A6	f3_T71S_K74I_S75F	f3_T71S_K74I_S75F	ATCGACGGTCTCGACAgAAATTTCAAGGGAGAGTAACGATCtctGCGGACatatttACTTCCACAGCTTCGAGACCAGTAGC	f3_T71S_K74I_S75F_rc	GCTACTGGTCTCGAAGCTGTGGAAGTaaatatGTCCGCagaGATCGTTACTCTCCCTTGAAATTTcTGTCGAGACCGTCGAT												E9	E10	E11	E12
A7	f3_K74I_T76S_S77N	f3_K74I_T76S_S77N	ATCGACGGTCTCGACAgAAATTTCAAGGGAGAGTAACGATCACCGCGGACataAGCtccaatACAGCTTCGAGACCAGTAGC	f3_K74I_T76S_S77N_rc	GCTACTGGTCTCGAAGCTGTattggaGCTtatGTCCGCGGTGATCGTTACTCTCCCTTGAAATTTcTGTCGAGACCGTCGAT												F9	F10	F11	F12
A8	f4	f4	ATCGACGGTCTCCGCTTACATGGAACTGAGCAGTCTGAGATCTGAAGATACAGCAGTCTACTACTGTGCACGACGAGACCAGTAGC	f4_rc	GCTACTGGTCTCGTCGTGCACAGTAGTAGACTGCTGTATCTTCAGATCTCAGACTGCTCAGTTCCATGTAAGCGGAGACCGTCGAT												G9	G10	G11	G12
A9	f5	f5	ATCGACGGTCTCCACGACACGGTaacTACTACTACTATTACGGtATGGATGTCTGGGGtCAAGGCACCGAGACCAGTAGC	f5_rc	GCTACTGGTCTCGGTGCCTTGaCCCCAGACATCCATaCCGTAATAGTAGTAGTAgttACCGTGTCGTGGAGACCGTCGAT												H9	H10	H11	H12
B1	f1_F29S	f1_F29S	ATCGACGGTCTCCGGTACCagtTCTTCCTACGCCATAAGCTGGGTAAGGCAGGCCCCGGGGCAGGGTGAGACCAGTAGC	f1_F29S_rc	GCTACTGGTCTCACCCTGCCCCGGGGCCTGCCTTACCCAGCTTATGGCGTAGGAAGAactGGTACCGGAGACCGTCGAT
B2	f2_I52S	f2_I52S	ATCGACGGTCTCGAGGGCTTGGAGTGGATGGGCGGCATCagtCCCATATTCGGCACCGCGAATTATGCACAgCGAGACCAGTAGC	f2_I52S_rc	GCTACTGGTCTCGcTGTGCATAATTCGCGGTGCCGAATATGGGactGATGCCGCCCATCCACTCCAAGCCCTCGAGACCGTCGAT
B3	f2_T57S_N59A	f2_T57S_N59A	ATCGACGGTCTCGAGGGCTTGGAGTGGATGGGCGGCATCATCCCCATATTCGGCtctGCGgctTATGCACAgCGAGACCAGTAGC	f2_T57S_N59A_rc	GCTACTGGTCTCGcTGTGCATAagcCGCagaGCCGAATATGGGGATGATGCCGCCCATCCACTCCAAGCCCTCGAGACCGTCGAT
B4	f3_T71S	f3_T71S	ATCGACGGTCTCGACAgAAATTTCAAGGGAGAGTAACGATCtctGCGGACAAGAGCACTTCCACAGCTTCGAGACCAGTAGC	f3_T71S_rc	GCTACTGGTCTCGAAGCTGTGGAAGTGCTCTTGTCCGCagaGATCGTTACTCTCCCTTGAAATTTcTGTCGAGACCGTCGAT
B5	f3_T71S_S77N	f3_T71S_S77N	ATCGACGGTCTCGACAgAAATTTCAAGGGAGAGTAACGATCtctGCGGACAAGAGCACTaatACAGCTTCGAGACCAGTAGC	f3_T71S_S77N_rc	GCTACTGGTCTCGAAGCTGTattAGTGCTCTTGTCCGCagaGATCGTTACTCTCCCTTGAAATTTcTGTCGAGACCGTCGAT
B6	f3_T71S_K74I_T76S	f3_T71S_K74I_T76S	ATCGACGGTCTCGACAgAAATTTCAAGGGAGAGTAACGATCtctGCGGACataAGCtccTCCACAGCTTCGAGACCAGTAGC	f3_T71S_K74I_T76S_rc	GCTACTGGTCTCGAAGCTGTGGAggaGCTtatGTCCGCagaGATCGTTACTCTCCCTTGAAATTTcTGTCGAGACCGTCGAT
B7	f3_S75F_T76S_S77N	f3_S75F_T76S_S77N	ATCGACGGTCTCGACAgAAATTTCAAGGGAGAGTAACGATCACCGCGGACAAGttttccaatACAGCTTCGAGACCAGTAGC	f3_S75F_T76S_S77N_rc	GCTACTGGTCTCGAAGCTGTattggaaaaCTTGTCCGCGGTGATCGTTACTCTCCCTTGAAATTTcTGTCGAGACCGTCGAT
B8	f4_S84N	f4_S84N	ATCGACGGTCTCCGCTTACATGGAACTGaatAGTCTGAGATCTGAAGATACAGCAGTCTACTACTGTGCACGACGAGACCAGTAGC	f4_S84N_rc	GCTACTGGTCTCGTCGTGCACAGTAGTAGACTGCTGTATCTTCAGATCTCAGACTattCAGTTCCATGTAAGCGGAGACCGTCGAT
B9	f5_Y106S	f5_Y106S	ATCGACGGTCTCCACGACACGGTaacTACTACTACTATagcGGtATGGATGTCTGGGGtCAAGGCACCGAGACCAGTAGC	f5_Y106S_rc	GCTACTGGTCTCGGTGCCTTGaCCCCAGACATCCATaCCgctATAGTAGTAGTAgttACCGTGTCGTGGAGACCGTCGAT
C1	f1_S30N	f1_S30N	ATCGACGGTCTCCGGTACCTTTaacTCCTACGCCATAAGCTGGGTAAGGCAGGCCCCGGGGCAGGGTGAGACCAGTAGC	f1_S30N_rc	GCTACTGGTCTCACCCTGCCCCGGGGCCTGCCTTACCCAGCTTATGGCGTAGGAgttAAAGGTACCGGAGACCGTCGAT
C2	f2_T57S	f2_T57S	ATCGACGGTCTCGAGGGCTTGGAGTGGATGGGCGGCATCATCCCCATATTCGGCtctGCGAATTATGCACAgCGAGACCAGTAGC	f2_T57S_rc	GCTACTGGTCTCGcTGTGCATAATTCGCagaGCCGAATATGGGGATGATGCCGCCCATCCACTCCAAGCCCTCGAGACCGTCGAT
C3	f2_A58T_N59A	f2_A58T_N59A	ATCGACGGTCTCGAGGGCTTGGAGTGGATGGGCGGCATCATCCCCATATTCGGCACCacagctTATGCACAgCGAGACCAGTAGC	f2_A58T_N59A_rc	GCTACTGGTCTCGcTGTGCATAagctgtGGTGCCGAATATGGGGATGATGCCGCCCATCCACTCCAAGCCCTCGAGACCGTCGAT
C4	f3_K74I	f3_K74I	ATCGACGGTCTCGACAgAAATTTCAAGGGAGAGTAACGATCACCGCGGACataAGCACTTCCACAGCTTCGAGACCAGTAGC	f3_K74I_rc	GCTACTGGTCTCGAAGCTGTGGAAGTGCTtatGTCCGCGGTGATCGTTACTCTCCCTTGAAATTTcTGTCGAGACCGTCGAT
C5	f3_K74I_S75F	f3_K74I_S75F	ATCGACGGTCTCGACAgAAATTTCAAGGGAGAGTAACGATCACCGCGGACatatttACTTCCACAGCTTCGAGACCAGTAGC	f3_K74I_S75F_rc	GCTACTGGTCTCGAAGCTGTGGAAGTaaatatGTCCGCGGTGATCGTTACTCTCCCTTGAAATTTcTGTCGAGACCGTCGAT
C6	f3_T71S_K74I_S77N	f3_T71S_K74I_S77N	ATCGACGGTCTCGACAgAAATTTCAAGGGAGAGTAACGATCtctGCGGACataAGCACTaatACAGCTTCGAGACCAGTAGC	f3_T71S_K74I_S77N_rc	GCTACTGGTCTCGAAGCTGTattAGTGCTtatGTCCGCagaGATCGTTACTCTCCCTTGAAATTTcTGTCGAGACCGTCGAT
C7	f3_T71S_K74I_S75F_T76S	f3_T71S_K74I_S75F_T76S	ATCGACGGTCTCGACAgAAATTTCAAGGGAGAGTAACGATCtctGCGGACatattttccTCCACAGCTTCGAGACCAGTAGC	f3_T71S_K74I_S75F_T76S_rc	GCTACTGGTCTCGAAGCTGTGGAggaaaatatGTCCGCagaGATCGTTACTCTCCCTTGAAATTTcTGTCGAGACCGTCGAT
C8	f4_R87T	f4_R87T	ATCGACGGTCTCCGCTTACATGGAACTGAGCAGTCTGactTCTGAAGATACAGCAGTCTACTACTGTGCACGACGAGACCAGTAGC	f4_R87T_rc	GCTACTGGTCTCGTCGTGCACAGTAGTAGACTGCTGTATCTTCAGAagtCAGACTGCTCAGTTCCATGTAAGCGGAGACCGTCGAT
D1	f1_S31N	f1_S31N	ATCGACGGTCTCCGGTACCTTTTCTaacTACGCCATAAGCTGGGTAAGGCAGGCCCCGGGGCAGGGTGAGACCAGTAGC	f1_S31N_rc	GCTACTGGTCTCACCCTGCCCCGGGGCCTGCCTTACCCAGCTTATGGCGTAgttAGAAAAGGTACCGGAGACCGTCGAT
D2	f2_A58T	f2_A58T	ATCGACGGTCTCGAGGGCTTGGAGTGGATGGGCGGCATCATCCCCATATTCGGCACCacaAATTATGCACAgCGAGACCAGTAGC	f2_A58T_rc	GCTACTGGTCTCGcTGTGCATAATTtgtGGTGCCGAATATGGGGATGATGCCGCCCATCCACTCCAAGCCCTCGAGACCGTCGAT
D3	f2_I52S_T57S_A58T	f2_I52S_T57S_A58T	ATCGACGGTCTCGAGGGCTTGGAGTGGATGGGCGGCATCagtCCCATATTCGGCtctacaAATTATGCACAgCGAGACCAGTAGC	f2_I52S_T57S_A58T_rc	GCTACTGGTCTCGcTGTGCATAATTtgtagaGCCGAATATGGGactGATGCCGCCCATCCACTCCAAGCCCTCGAGACCGTCGAT
D4	f3_S75F	f3_S75F	ATCGACGGTCTCGACAgAAATTTCAAGGGAGAGTAACGATCACCGCGGACAAGtttACTTCCACAGCTTCGAGACCAGTAGC	f3_S75F_rc	GCTACTGGTCTCGAAGCTGTGGAAGTaaaCTTGTCCGCGGTGATCGTTACTCTCCCTTGAAATTTcTGTCGAGACCGTCGAT
D5	f3_K74_T76S	f3_K74_T76S	ATCGACGGTCTCGACAgAAATTTCAAGGGAGAGTAACGATCACCGCGGACataAGCtccTCCACAGCTTCGAGACCAGTAGC	f3_K74_T76S_rc	GCTACTGGTCTCGAAGCTGTGGAggaGCTtatGTCCGCGGTGATCGTTACTCTCCCTTGAAATTTcTGTCGAGACCGTCGAT
D6	f3_T71S_S75F_T76S	f3_T71S_S75F_T76S	ATCGACGGTCTCGACAgAAATTTCAAGGGAGAGTAACGATCtctGCGGACAAGttttccTCCACAGCTTCGAGACCAGTAGC	f3_T71S_S75F_T76S_rc	GCTACTGGTCTCGAAGCTGTGGAggaaaaCTTGTCCGCagaGATCGTTACTCTCCCTTGAAATTTcTGTCGAGACCGTCGAT
D7	f3_T71S_K74I_S75F_S77N	f3_T71S_K74I_S75F_S77N	ATCGACGGTCTCGACAgAAATTTCAAGGGAGAGTAACGATCtctGCGGACatatttACTaatACAGCTTCGAGACCAGTAGC	f3_T71S_K74I_S75F_S77N_rc	GCTACTGGTCTCGAAGCTGTattAGTaaatatGTCCGCagaGATCGTTACTCTCCCTTGAAATTTcTGTCGAGACCGTCGAT
D8	f4_Y95F	f4_Y95F	ATCGACGGTCTCCGCTTACATGGAACTGAGCAGTCTGAGATCTGAAGATACAGCAGTCTACtttTGTGCACGACGAGACCAGTAGC	f4_Y95F_rc	GCTACTGGTCTCGTCGTGCACAaaaGTAGACTGCTGTATCTTCAGATCTCAGACTGCTCAGTTCCATGTAAGCGGAGACCGTCGAT
E1	f1_F29S_S30N	f1_F29S_S30N	ATCGACGGTCTCCGGTACCagtaacTCCTACGCCATAAGCTGGGTAAGGCAGGCCCCGGGGCAGGGTGAGACCAGTAGC	f1_F29S_S30N_rc	GCTACTGGTCTCACCCTGCCCCGGGGCCTGCCTTACCCAGCTTATGGCGTAGGAgttactGGTACCGGAGACCGTCGAT
E2	f2_N59A	f2_N59A	ATCGACGGTCTCGAGGGCTTGGAGTGGATGGGCGGCATCATCCCCATATTCGGCACCGCGgctTATGCACAgCGAGACCAGTAGC	f2_N59A_rc	GCTACTGGTCTCGcTGTGCATAagcCGCGGTGCCGAATATGGGGATGATGCCGCCCATCCACTCCAAGCCCTCGAGACCGTCGAT
E3	f2_I52S_T57S_N59A	f2_I52S_T57S_N59A	ATCGACGGTCTCGAGGGCTTGGAGTGGATGGGCGGCATCagtCCCATATTCGGCtctGCGgctTATGCACAgCGAGACCAGTAGC	f2_I52S_T57S_N59A_rc	GCTACTGGTCTCGcTGTGCATAagcCGCagaGCCGAATATGGGactGATGCCGCCCATCCACTCCAAGCCCTCGAGACCGTCGAT
E4	f3_T76S	f3_T76S	ATCGACGGTCTCGACAgAAATTTCAAGGGAGAGTAACGATCACCGCGGACAAGAGCtccTCCACAGCTTCGAGACCAGTAGC	f3_T76S_rc	GCTACTGGTCTCGAAGCTGTGGAggaGCTCTTGTCCGCGGTGATCGTTACTCTCCCTTGAAATTTcTGTCGAGACCGTCGAT
E5	f3_K74I_S77N	f3_K74I_S77N	ATCGACGGTCTCGACAgAAATTTCAAGGGAGAGTAACGATCACCGCGGACataAGCACTaatACAGCTTCGAGACCAGTAGC	f3_K74I_S77N_rc	GCTACTGGTCTCGAAGCTGTattAGTGCTtatGTCCGCGGTGATCGTTACTCTCCCTTGAAATTTcTGTCGAGACCGTCGAT
E6	f3_T71S_S75F_S77N	f3_T71S_S75F_S77N	ATCGACGGTCTCGACAgAAATTTCAAGGGAGAGTAACGATCtctGCGGACAAGtttACTaatACAGCTTCGAGACCAGTAGC	f3_T71S_S75F_S77N_rc	GCTACTGGTCTCGAAGCTGTattAGTaaaCTTGTCCGCagaGATCGTTACTCTCCCTTGAAATTTcTGTCGAGACCGTCGAT
E7	f3_T71S_K74I_T76S_S77N	f3_T71S_K74I_T76S_S77N	ATCGACGGTCTCGACAgAAATTTCAAGGGAGAGTAACGATCtctGCGGACataAGCtccaatACAGCTTCGAGACCAGTAGC	f3_T71S_K74I_T76S_S77N_rc	GCTACTGGTCTCGAAGCTGTattggaGCTtatGTCCGCagaGATCGTTACTCTCCCTTGAAATTTcTGTCGAGACCGTCGAT
E8	f4_S84N_R87T	f4_S84N_R87T	ATCGACGGTCTCCGCTTACATGGAACTGaatAGTCTGactTCTGAAGATACAGCAGTCTACTACTGTGCACGACGAGACCAGTAGC	f4_S84N_R87T_rc	GCTACTGGTCTCGTCGTGCACAGTAGTAGACTGCTGTATCTTCAGAagtCAGACTattCAGTTCCATGTAAGCGGAGACCGTCGAT
F1	f1_F29S_S31N	f1_F29S_S31N	ATCGACGGTCTCCGGTACCagtTCTaacTACGCCATAAGCTGGGTAAGGCAGGCCCCGGGGCAGGGTGAGACCAGTAGC	f1_F29S_S31N_rc	GCTACTGGTCTCACCCTGCCCCGGGGCCTGCCTTACCCAGCTTATGGCGTAgttAGAactGGTACCGGAGACCGTCGAT
F2	f2_I52S_T57S	f2_I52S_T57S	ATCGACGGTCTCGAGGGCTTGGAGTGGATGGGCGGCATCagtCCCATATTCGGCtctGCGAATTATGCACAgCGAGACCAGTAGC	f2_I52S_T57S_rc	GCTACTGGTCTCGcTGTGCATAATTCGCagaGCCGAATATGGGactGATGCCGCCCATCCACTCCAAGCCCTCGAGACCGTCGAT
F3	f2_I52S_A58T_N59A	f2_I52S_A58T_N59A	ATCGACGGTCTCGAGGGCTTGGAGTGGATGGGCGGCATCagtCCCATATTCGGCACCacagctTATGCACAgCGAGACCAGTAGC	f2_I52S_A58T_N59A_rc	GCTACTGGTCTCGcTGTGCATAagctgtGGTGCCGAATATGGGactGATGCCGCCCATCCACTCCAAGCCCTCGAGACCGTCGAT
F4	f3_S77N	f3_S77N	ATCGACGGTCTCGACAgAAATTTCAAGGGAGAGTAACGATCACCGCGGACAAGAGCACTaatACAGCTTCGAGACCAGTAGC	f3_S77N_rc	GCTACTGGTCTCGAAGCTGTattAGTGCTCTTGTCCGCGGTGATCGTTACTCTCCCTTGAAATTTcTGTCGAGACCGTCGAT
F5	f3_S75F_T76S	f3_S75F_T76S	ATCGACGGTCTCGACAgAAATTTCAAGGGAGAGTAACGATCACCGCGGACAAGttttccTCCACAGCTTCGAGACCAGTAGC	f3_S75F_T76S_rc	GCTACTGGTCTCGAAGCTGTGGAggaaaaCTTGTCCGCGGTGATCGTTACTCTCCCTTGAAATTTcTGTCGAGACCGTCGAT
F6	f3_T71S_T76S_S77N	f3_T71S_T76S_S77N	ATCGACGGTCTCGACAgAAATTTCAAGGGAGAGTAACGATCtctGCGGACAAGAGCtccaatACAGCTTCGAGACCAGTAGC	f3_T71S_T76S_S77N_rc	GCTACTGGTCTCGAAGCTGTattggaGCTCTTGTCCGCagaGATCGTTACTCTCCCTTGAAATTTcTGTCGAGACCGTCGAT
F7	f3_T71S_S75F_T76S_S77N	f3_T71S_S75F_T76S_S77N	ATCGACGGTCTCGACAgAAATTTCAAGGGAGAGTAACGATCtctGCGGACAAGttttccaatACAGCTTCGAGACCAGTAGC	f3_T71S_S75F_T76S_S77N_rc	GCTACTGGTCTCGAAGCTGTattggaaaaCTTGTCCGCagaGATCGTTACTCTCCCTTGAAATTTcTGTCGAGACCGTCGAT
F8	f4_S84N_Y95F	f4_S84N_Y95F	ATCGACGGTCTCCGCTTACATGGAACTGaatAGTCTGAGATCTGAAGATACAGCAGTCTACtttTGTGCACGACGAGACCAGTAGC	f4_S84N_Y95F_rc	GCTACTGGTCTCGTCGTGCACAaaaGTAGACTGCTGTATCTTCAGATCTCAGACTattCAGTTCCATGTAAGCGGAGACCGTCGAT
G1	f1_S30N_S31N	f1_S30N_S31N	ATCGACGGTCTCCGGTACCTTTaacaacTACGCCATAAGCTGGGTAAGGCAGGCCCCGGGGCAGGGTGAGACCAGTAGC	f1_S30N_S31N_rc	GCTACTGGTCTCACCCTGCCCCGGGGCCTGCCTTACCCAGCTTATGGCGTAgttgttAAAGGTACCGGAGACCGTCGAT
G2	f2_I52S_A58T	f2_I52S_A58T	ATCGACGGTCTCGAGGGCTTGGAGTGGATGGGCGGCATCagtCCCATATTCGGCACCacaAATTATGCACAgCGAGACCAGTAGC	f2_I52S_A58T_rc	GCTACTGGTCTCGcTGTGCATAATTtgtGGTGCCGAATATGGGactGATGCCGCCCATCCACTCCAAGCCCTCGAGACCGTCGAT
G3	f2_T57S_A58T_N59A	f2_T57S_A58T_N59A	ATCGACGGTCTCGAGGGCTTGGAGTGGATGGGCGGCATCATCCCCATATTCGGCtctacagctTATGCACAgCGAGACCAGTAGC	f2_T57S_A58T_N59A_rc	GCTACTGGTCTCGcTGTGCATAagctgtagaGCCGAATATGGGGATGATGCCGCCCATCCACTCCAAGCCCTCGAGACCGTCGAT
G4	f3_T71S_K74I	f3_T71S_K74I	ATCGACGGTCTCGACAgAAATTTCAAGGGAGAGTAACGATCtctGCGGACataAGCACTTCCACAGCTTCGAGACCAGTAGC	f3_T71S_K74I_rc	GCTACTGGTCTCGAAGCTGTGGAAGTGCTtatGTCCGCagaGATCGTTACTCTCCCTTGAAATTTcTGTCGAGACCGTCGAT
G5	f3_S75F_S77N	f3_S75F_S77N	ATCGACGGTCTCGACAgAAATTTCAAGGGAGAGTAACGATCACCGCGGACAAGtttACTaatACAGCTTCGAGACCAGTAGC	f3_S75F_S77N_rc	GCTACTGGTCTCGAAGCTGTattAGTaaaCTTGTCCGCGGTGATCGTTACTCTCCCTTGAAATTTcTGTCGAGACCGTCGAT
G6	f3_K74I_S75F_T76S	f3_K74I_S75F_T76S	ATCGACGGTCTCGACAgAAATTTCAAGGGAGAGTAACGATCACCGCGGACatattttccTCCACAGCTTCGAGACCAGTAGC	f3_K74I_S75F_T76S_rc	GCTACTGGTCTCGAAGCTGTGGAggaaaatatGTCCGCGGTGATCGTTACTCTCCCTTGAAATTTcTGTCGAGACCGTCGAT
G7	f3_K74I_S75F_T76S_S77N	f3_K74I_S75F_T76S_S77N	ATCGACGGTCTCGACAgAAATTTCAAGGGAGAGTAACGATCACCGCGGACatattttccaatACAGCTTCGAGACCAGTAGC	f3_K74I_S75F_T76S_S77N_rc	GCTACTGGTCTCGAAGCTGTattggaaaatatGTCCGCGGTGATCGTTACTCTCCCTTGAAATTTcTGTCGAGACCGTCGAT
G8	f4_R87T_Y95F	f4_R87T_Y95F	ATCGACGGTCTCCGCTTACATGGAACTGAGCAGTCTGactTCTGAAGATACAGCAGTCTACtttTGTGCACGACGAGACCAGTAGC	f4_R87T_Y95F_rc	GCTACTGGTCTCGTCGTGCACAaaaGTAGACTGCTGTATCTTCAGAagtCAGACTGCTCAGTTCCATGTAAGCGGAGACCGTCGAT
H1	f1_F29S_S30N_S31N	f1_F29S_S30N_S31N	ATCGACGGTCTCCGGTACCagtaacaacTACGCCATAAGCTGGGTAAGGCAGGCCCCGGGGCAGGGTGAGACCAGTAGC	f1_F29S_S30N_S31N_rc	GCTACTGGTCTCACCCTGCCCCGGGGCCTGCCTTACCCAGCTTATGGCGTAgttgttactGGTACCGGAGACCGTCGAT
H2	f2_I52S_N59A	f2_I52S_N59A	ATCGACGGTCTCGAGGGCTTGGAGTGGATGGGCGGCATCagtCCCATATTCGGCACCGCGgctTATGCACAgCGAGACCAGTAGC	f2_I52S_N59A_rc	GCTACTGGTCTCGcTGTGCATAagcCGCGGTGCCGAATATGGGactGATGCCGCCCATCCACTCCAAGCCCTCGAGACCGTCGAT
H3	f2_I52S_T57S_A58T_N59A	f2_I52S_T57S_A58T_N59A	ATCGACGGTCTCGAGGGCTTGGAGTGGATGGGCGGCATCagtCCCATATTCGGCtctacagctTATGCACAgCGAGACCAGTAGC	f2_I52S_T57S_A58T_N59A_rc	GCTACTGGTCTCGcTGTGCATAagctgtagaGCCGAATATGGGactGATGCCGCCCATCCACTCCAAGCCCTCGAGACCGTCGAT
H4	f3_T71S_S75F	f3_T71S_S75F	ATCGACGGTCTCGACAgAAATTTCAAGGGAGAGTAACGATCtctGCGGACAAGtttACTTCCACAGCTTCGAGACCAGTAGC	f3_T71S_S75F_rc	GCTACTGGTCTCGAAGCTGTGGAAGTaaaCTTGTCCGCagaGATCGTTACTCTCCCTTGAAATTTcTGTCGAGACCGTCGAT
H5	f3_T76S_S77N	f3_T76S_S77N	ATCGACGGTCTCGACAgAAATTTCAAGGGAGAGTAACGATCACCGCGGACAAGAGCtccaatACAGCTTCGAGACCAGTAGC	f3_T76S_S77N_rc	GCTACTGGTCTCGAAGCTGTattggaGCTCTTGTCCGCGGTGATCGTTACTCTCCCTTGAAATTTcTGTCGAGACCGTCGAT
H6	f3_K74I_S75F_S77N	f3_K74I_S75F_S77N	ATCGACGGTCTCGACAgAAATTTCAAGGGAGAGTAACGATCACCGCGGACatatttACTaatACAGCTTCGAGACCAGTAGC	f3_K74I_S75F_S77N_rc	GCTACTGGTCTCGAAGCTGTattAGTaaatatGTCCGCGGTGATCGTTACTCTCCCTTGAAATTTcTGTCGAGACCGTCGAT
H7	f3_T71S_K74I_S75F_T76S_S77N	f3_T71S_K74I_S75F_T76S_S77N	ATCGACGGTCTCGACAgAAATTTCAAGGGAGAGTAACGATCtctGCGGACatattttccaatACAGCTTCGAGACCAGTAGC	f3_T71S_K74I_S75F_T76S_S77N_rc	GCTACTGGTCTCGAAGCTGTattggaaaatatGTCCGCagaGATCGTTACTCTCCCTTGAAATTTcTGTCGAGACCGTCGAT
H8	f4_S84N_R87T_Y95F	f4_S84N_R87T_Y95F	ATCGACGGTCTCCGCTTACATGGAACTGaatAGTCTGactTCTGAAGATACAGCAGTCTACtttTGTGCACGACGAGACCAGTAGC	f4_S84N_R87T_Y95F_rc	GCTACTGGTCTCGTCGTGCACAaaaGTAGACTGCTGTATCTTCAGAagtCAGACTattCAGTTCCATGTAAGCGGAGACCGTCGAT
