# Supplementary material for: Binding affinity landscapes constrain the evolution of broadly neutralizing anti-influenza antibodies
Source: eLife. 2021 Sep 7;10:e71393. doi: 10.7554/eLife.71393 (PMC8476123; doi:10.7554/eLife.71393)
Supplement: Supplementary file 3. [file elife-71393-supp3.xlsx]

## Sheet: CR6261_library_primers
NO	PRIMER NAME	SEQUENCE
1	f1_for_T28P_S30R	GTATCCGGTCTCGGGGACCTTTTCGTTCCTACGCCATTTCTTGGGTG
2	f1_for_S30R	GTATCCGGTCTCGGGGAACGTTTCGTTCCTACGCCA
3	f1_for_T28P_S30R	GTATCCGGTCTCGGGGACCTTTTTCTTCCTACGCCA
4	f1_for	GTATCCGGTCTCGGGGAACGTTTTCTTCCTACGCCA
5	f1_rev_A58T_N59K	GTATCCGGTCTCGGCGTACTTAGTGGTGCCAAATATGGG
6	f1_rev_N59K	GTATCCGGTCTCGGCGTACTTCGCGGTGCCAAATAT
7	f1_rev_A58T	GTATCCGGTCTCGGCGTAATTAGTGGTGCCAAATATGGG
8	f1_rev	GTATCCGGTCTCGGCGTAATTCGCGGTGCCAAATAT
9	f2_for_Q62P	GTATCCGGTCTCGACGCTCCTAAGTTCCAGGGGAGGGT
10	f2_for	GTATCCGGTCTCGACGCTCAGAAGTTCCAGG
11	f2_rev_K74D_S75F_S77G	GTATCCGGTCTCGGTgcCAGTGAAATCATCCGCGGTAATCGTAAC
12	f2_rev_S75F_S77G	GTATCCGGTCTCGGTgcCAGTGAATTTATCCGCGGTAATCGTAAC
13	f2_rev_K74D_S77G	GTATCCGGTCTCGGTgcCAGTGCTATCATCCGCGGTAATCGTAAC
14	f2_rev_S77G	GTATCCGGTCTCGGTgcCAGTGCTTTTATCCGCGGTAATCG
15	f2_rev_K74D_S75F_T76A_S77G	GTATCCGGTCTCGGTgcCGGCGAAATCATCCGCGGTAATCGTAAC
16	f2_rev_S75F_T76A_S77G	GTATCCGGTCTCGGTgcCGGCGAATTTATCCGCGGTAATCGTAAC
17	f2_rev_K74D_T76A_S77G	GTATCCGGTCTCGGTgcCGGCGCTATCATCCGCGGTAATCGTAAC
18	f2_rev_T76A_S77G	GTATCCGGTCTCGGTgcCGGCGCTTTTATCCGCGGTAATCG
19	f2_rev_K74D_S75F	GTATCCGGTCTCGGTgcTAGTGAAATCATCCGCGGTAATCGTAAC
20	f2_rev_S75F	GTATCCGGTCTCGGTgcTAGTGAATTTATCCGCGGTAATCGTAAC
21	f2_rev_K74D	GTATCCGGTCTCGGTgcTAGTGCTATCATCCGCGGTAATCGTAAC
22	f2_rev	GTATCCGGTCTCGGTgcTAGTGCTTTTATCCGCGGTAATCG
23	f2_rev_K74D_S75F_T76A	GTATCCGGTCTCGGTgcTGGCGAAATCATCCGCGGTAATCGTAAC
24	f2_rev_S75F_T76A	GTATCCGGTCTCGGTgcTGGCGAATTTATCCGCGGTAATCGTAAC
25	f2_rev_K74D_T76A	GTATCCGGTCTCGGTgcTGGCGCTATCATCCGCGGTAATCGTAAC
26	f2_rev_T76A	GTATCCGGTCTCGGTgcTGGCGCTTTTATCCGCGGTAATCG
27	f3_for_A79V	GTATCCGGTCTCGgcACGGTTTATATGGAATTAAGCAGTCTAAGATCAGAA
28	f3_for	GTATCCGGTCTCGgcACGGCCTATATGGAATTAAGCAGTCTAAGATCAGAA
29	f3_revL104_V	GTATCCGGTCTCGCTCTGACTTGATAGCCCATATGCTTAGCACAATAG
30	f3_rev	GTATCCGGTCTCGCTCTAAGTTGATAGCCCATATGCTTAGCAC
31	bb_for	GTATCCGGTCTCGAGAGAGACGatggatgtctgg
32	bb_rev	GTATCCGGTCTCGTCCCCCGCTGGCCTTACAAGA
