# Supplementary figures and images for: Binding affinity landscapes constrain the evolution of broadly neutralizing anti-influenza antibodies
Source: eLife journal article supplement (doi:10.7554/elife.71393), 2021-09-07

# **A First order effects vs. HA contact surface area**

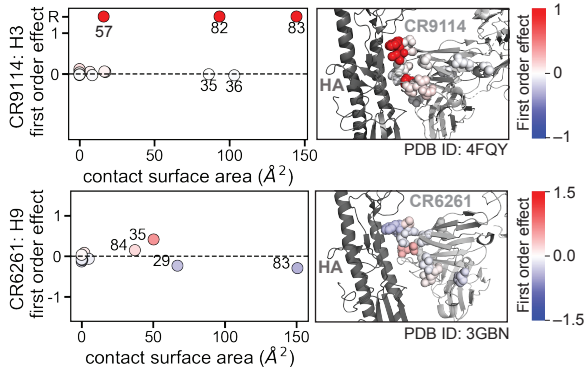

# **B Second order effects vs. distance**

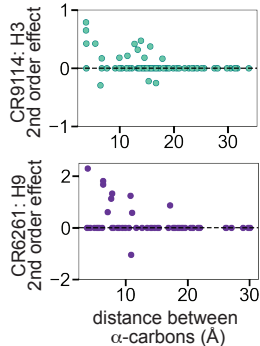

Supplement: supp [file elife-71393-supp-v1.zip]

## A Selection models

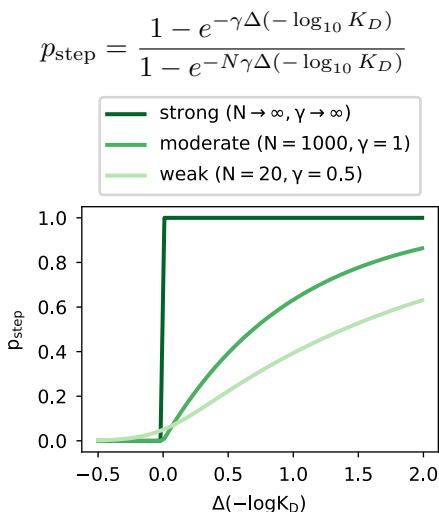

## B CR9114 alternative selection models

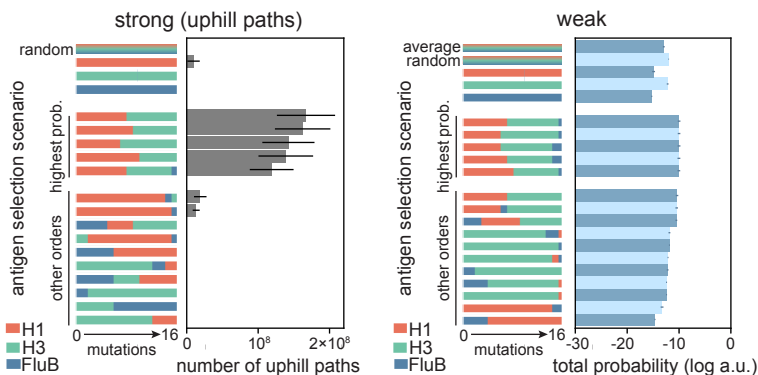

## C CR6261 alternative selection models

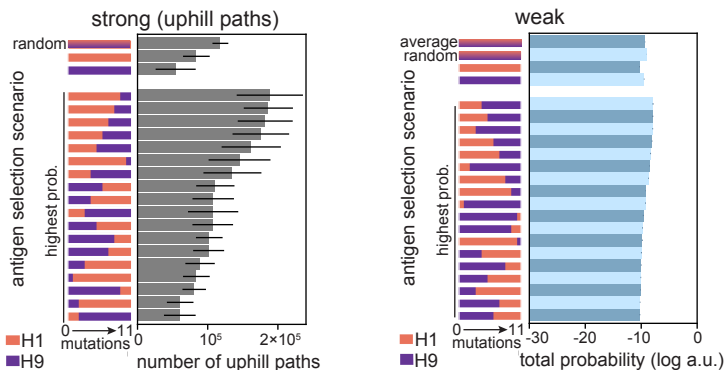

Supplement: supp [file elife-71393-supp-v1.zip]

**A** CR9114: Variant probability  
under 'O' moderate selection scenario

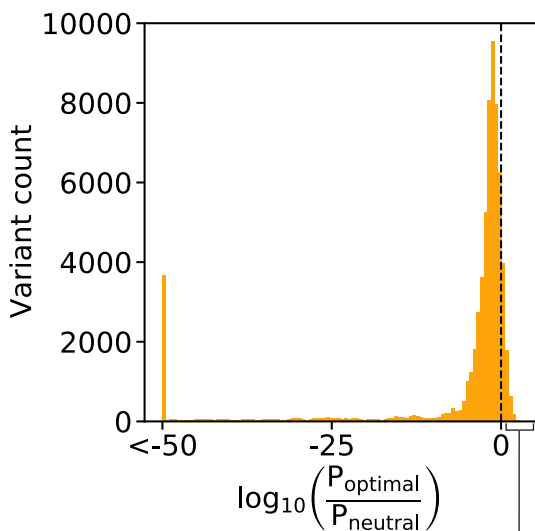

**B** CR9114: Variant probability map

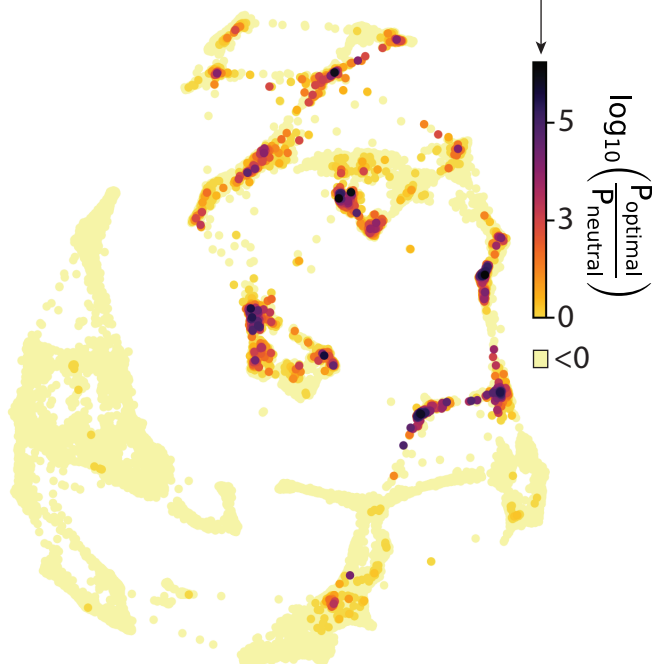

Supplement: supp [file elife-71393-supp-v1.zip]

**A CR9114 somatic reversions**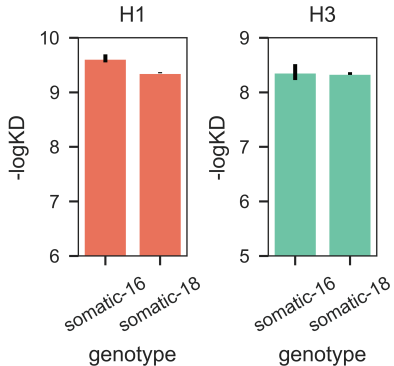**B CR6261 somatic reversions**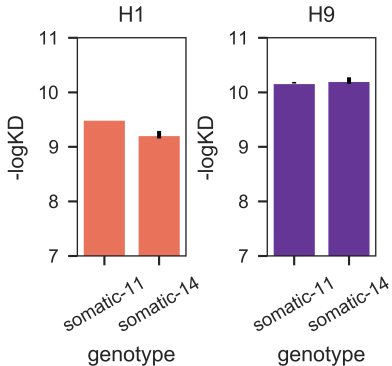

Supplement: supp [file elife-71393-supp-v1.zip]

**A** CR9114 binds HA2 stem epitope

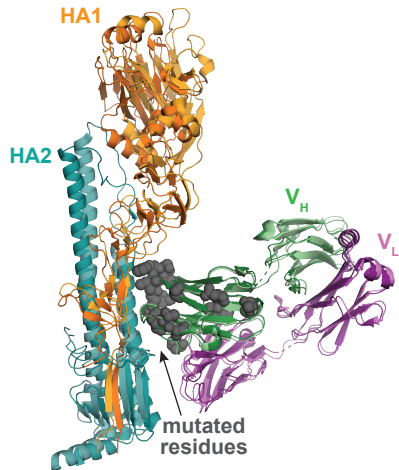

**B** CR6261 binds HA2 stem epitope

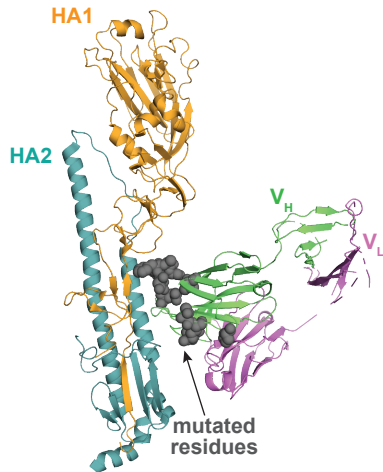

Supplement: supp [file elife-71393-supp-v1.zip]

**A** CR6261 H1: interaction map of 29, 35, 82, and 83

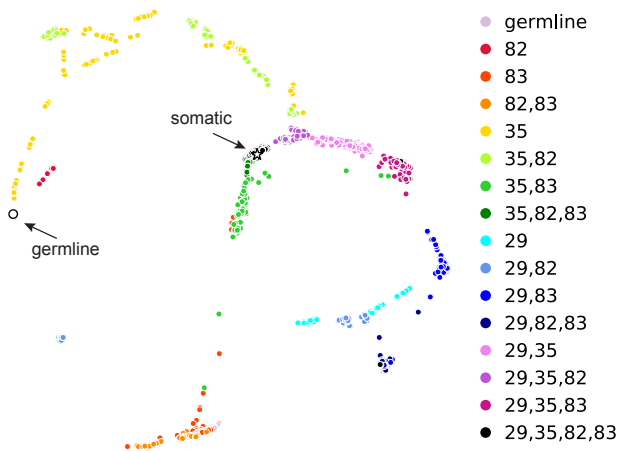

**B** CR6261 H1: interaction coefficients

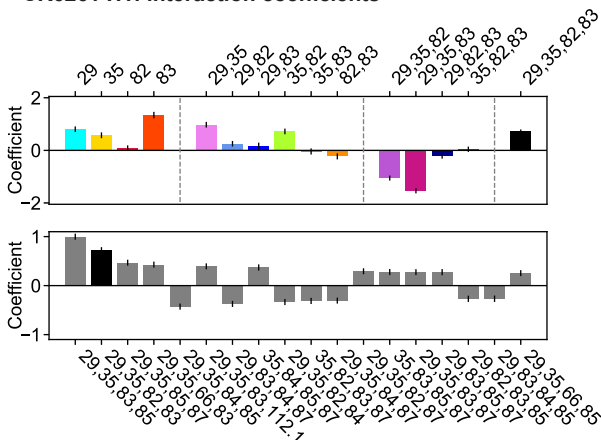

**C** CR6261 H1: interaction map of 65, 66, 69, and 112.1

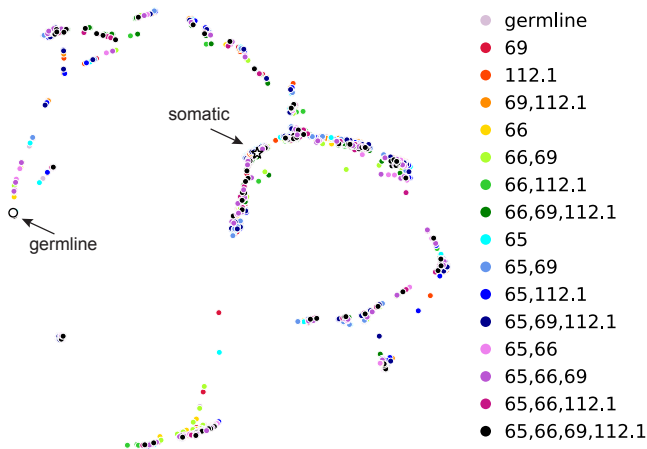

Supplement: supp [file elife-71393-supp-v1.zip]

**A** CR9114 H1: interaction map of 35, 36, 64, 66, and 85

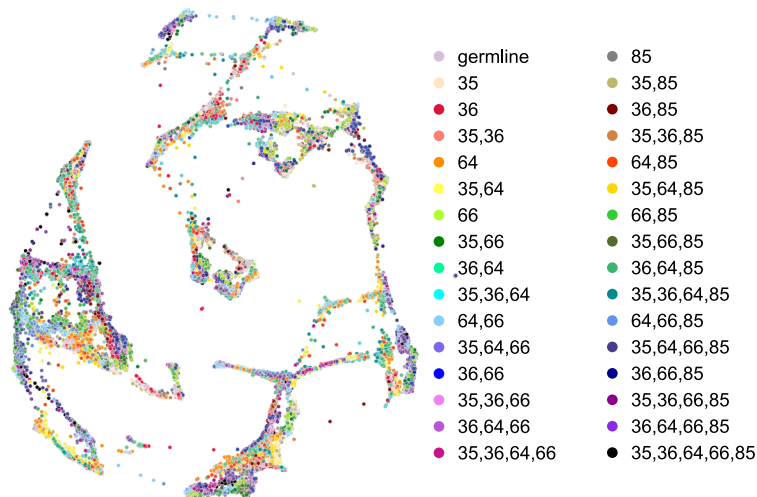

**B** CR9114 H1: interaction map of 79, 84, 92, 95, and 103

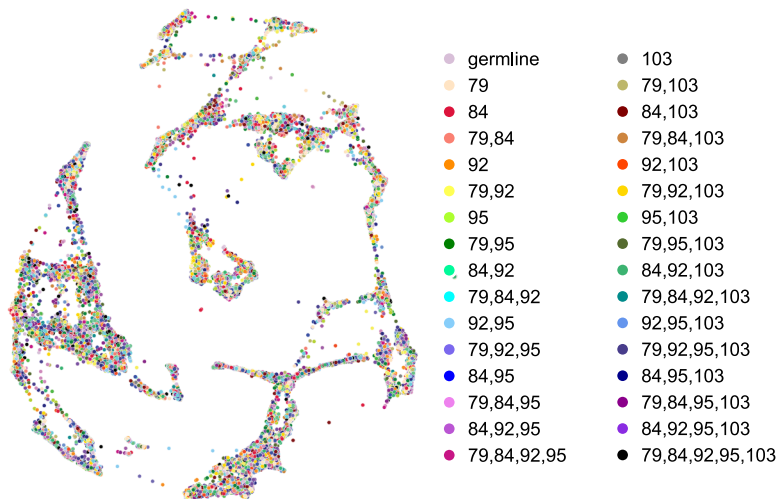

Supplement: supp [file elife-71393-supp-v1.zip]

# A CR9114 H3: 3<sup>rd</sup> – 4<sup>th</sup> order effects

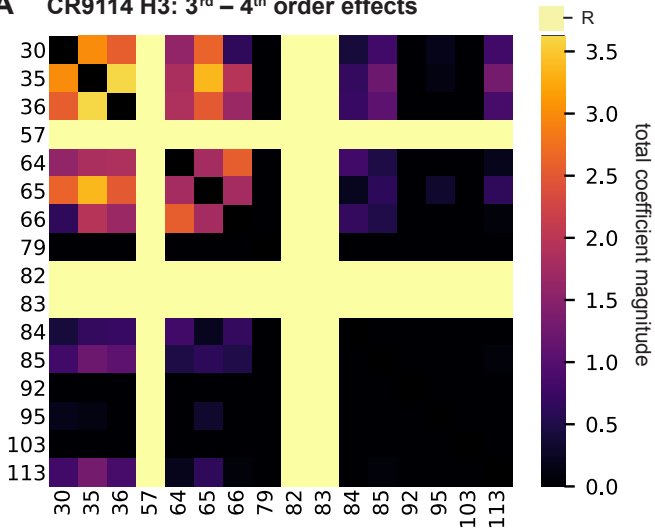

Supplement: supp [file elife-71393-supp-v1.zip]

**A** CR6261 force-directed graph: H1  $-\log K_D$

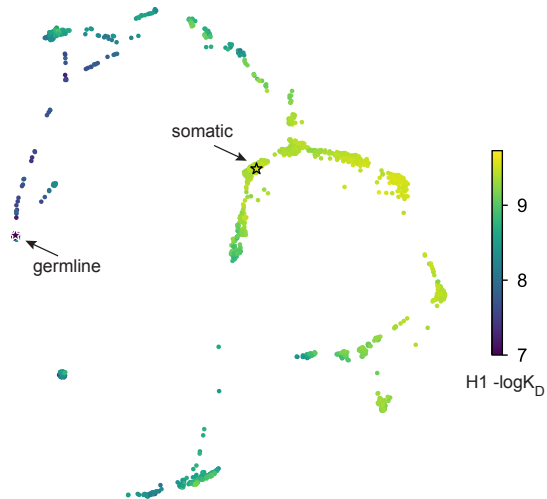

**B** CR6261 force-directed graph: H9  $-\log K_D$

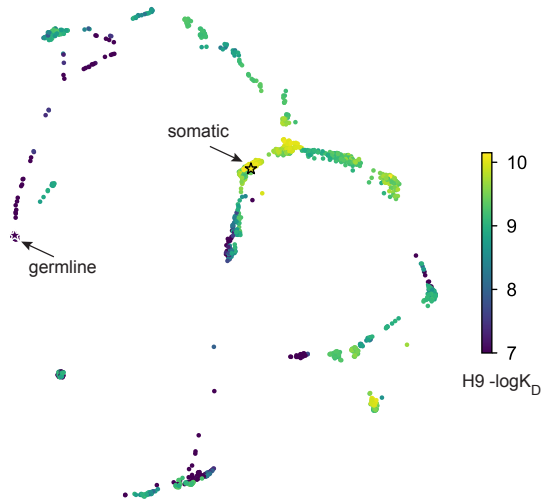

Supplement: supp [file elife-71393-supp-v1.zip]

**A** CR6261 H9: 3<sup>rd</sup> - 4<sup>th</sup> order effects

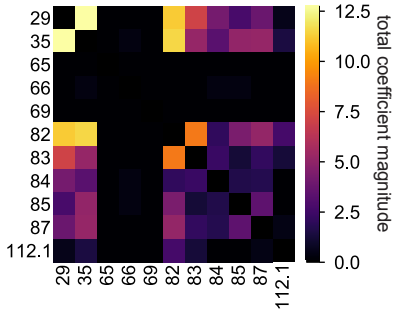

**B** CR6261 H1 vs H9 significant coefficients

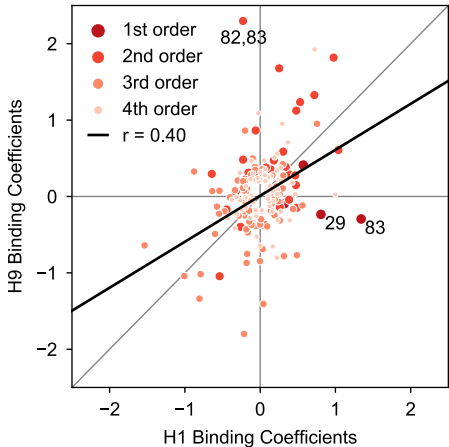

Supplement: supp [file elife-71393-supp-v1.zip]
